# Supplementary material
Source: PubMed Central journal article supplement (PMC4390261)
Supplement: supp_M114.045922_mcp.M114.045922-3.pdf [file supp_M114.045922_mcp.M114.045922-3.pdf]

**Table S2. Comparison of *M. tuberculosis* H37Rv succinylome with other succinylomes. BLAST alignments were performed by using two-directional BlastP software with BLOSUM62 matrix; the best-scoring homologous protein was selected if the corresponding BLAST E values were lower than 1E-5.**

| <i>M. tuberculosis</i> H37Rv | Synonym | Description                                                                                                                                                                                                                                                                                              | Prokaryote                      |                               | Eukaryote                       |                       |                        |                                |
|------------------------------|---------|----------------------------------------------------------------------------------------------------------------------------------------------------------------------------------------------------------------------------------------------------------------------------------------------------------|---------------------------------|-------------------------------|---------------------------------|-----------------------|------------------------|--------------------------------|
|                              |         |                                                                                                                                                                                                                                                                                                          | <i>Escherichia coli</i> BW25113 | <i>Escherichia coli</i> DH10B | <i>Saccharomyces cerevisiae</i> | <i>Homo sapiens</i>   | <i>Mus musculus</i>    | <i>Drosophila melanogaster</i> |
| gi 15607151                  | Rv0009  | Probable iron-regulated peptidyl-prolyl cis-trans isomerase A PpiA (PPIase A) (rotamase A)                                                                                                                                                                                                               | sp P23869 PPIB_ECOLI            | gi 170080108                  | Not found                       | sp P23284 PPIB_HUMAN  | tr Q9DCY1 Q9DCY1_MOUSE | Not found                      |
| gi 15607195                  | Rv0053  | 30S ribosomal protein S6 RpsF                                                                                                                                                                                                                                                                            | sp P02358 RS6_ECOLI             | gi 170083646                  | Not found                       | Not found             | Not found              | Not found                      |
| gi 15607196                  | Rv0054  | Single-strand binding protein Ssb (helix-destabilizing protein)                                                                                                                                                                                                                                          | Not found                       | gi 170083515                  | Not found                       | Not found             | Not found              | Not found                      |
| gi 15607261                  | Rv0119  | Probable fatty-acid-CoA ligase FadD7 (fatty-acid-CoA synthetase) (fatty-acid-CoA synthase)                                                                                                                                                                                                               | Not found                       | Not found                     | YBR222C                         | Not found             | Not found              | Not found                      |
| gi 15607330                  | Rv0189c | Probable dihydroxy-acid dehydratase llvD (dad)                                                                                                                                                                                                                                                           | sp P05791 LLVD_ECOLI            | Not found                     | YJR016C                         | Not found             | Not found              | Not found                      |
| gi 15607364                  | Rv0223c | Probable aldehyde dehydrogenase                                                                                                                                                                                                                                                                          | sp P25553 ALDA_ECOLI            | gi 170079935                  | YER073W                         | Not found             | Not found              | Not found                      |
| gi 15607388                  | Rv0247c | Probable succinate dehydrogenase [iron-sulfur subunit] (succinic dehydrogenase)                                                                                                                                                                                                                          | sp P0AC47 FRDB_ECOLI            | Not found                     | Not found                       | sp P21912 DHSB_HUMAN  | sp Q9CQA3 DHSB_MOUSE   | Not found                      |
| gi 15607475                  | Rv0334  | Alpha-D-glucose-1-phosphate thymidyltransferase RmlA (dTDP-glucose synthase) (dTDP-glucose pyrophosphorylase)                                                                                                                                                                                            | sp P37744 RMLA1_ECOLI           | gi 170081669                  | Not found                       | Not found             | Not found              | Not found                      |
| gi 15607491                  | Rv0350  | Probable chaperone protein DnaK (heat shock protein 70) (heat shock 70 kDa protein) (HSP70)                                                                                                                                                                                                              | Not found                       | Not found                     | YJR045C                         | Not found             | Not found              | Not found                      |
| gi 15607498                  | Rv0357c | Probable adenylosuccinate synthetase PurA (imp--aspartate ligase) (ADSS) (ampsase)                                                                                                                                                                                                                       | sp P0A7D4 PURA_ECOLI            | gi 170083623                  | Not found                       | Not found             | Not found              | Not found                      |
| gi 15607504                  | Rv0363c | Probable fructose-bisphosphate aldolase Fba                                                                                                                                                                                                                                                              | sp P0AB71 ALF_ECOLI             | gi 170082482                  | YKL060C                         | Not found             | Not found              | Not found                      |
| gi 15607541                  | Rv0400c | Acyl-CoA dehydrogenase FadE7                                                                                                                                                                                                                                                                             | Not found                       | Not found                     | Not found                       | Not found             | sp Q60759 GCDH_MOUSE   | Not found                      |
| gi 15607549                  | Rv0408  | Probable phosphate acetyltransferase Pta (phosphotransacetylase)                                                                                                                                                                                                                                         | sp P0A9M8 PTA_ECOLI             | gi 170081913                  | Not found                       | Not found             | Not found              | Not found                      |
| gi 15607563                  | Rv0422c | Probable phosphomethylpyrimidine kinase ThiD (HMP-phosphate kinase) (HMP-P kinase)                                                                                                                                                                                                                       | Not found                       | gi 170082027                  | Not found                       | Not found             | Not found              | Not found                      |
| gi 15607564                  | Rv0423c | Probable thiamine biosynthesis protein ThiC                                                                                                                                                                                                                                                              | sp P30136 THIC_ECOLI            | Not found                     | Not found                       | Not found             | Not found              | Not found                      |
| gi 15607573                  | Rv0432  | Periplasmic superoxide dismutase [Cu-Zn] SodC                                                                                                                                                                                                                                                            | Not found                       | Not found                     | Not found                       | sp P00441 SODC_HUMAN  | sp P08228 SODC_MOUSE   | Not found                      |
| gi 15607581                  | Rv0440  | 60 kDa chaperonin 2 GroEL2 (protein CPN60-2) (GroEL protein 2) (65 kDa antigen) (heat shock protein 65) (cell wall protein A) (antigen A)                                                                                                                                                                | sp P0A6F5 CH60_ECOLI            | gi 170083592                  | YLR259C                         | sp P10809 CH60_HUMAN  | sp P63038 CH60_MOUSE   | Not found                      |
| gi 15607603                  | Rv0462  | Dihydrolipoamide dehydrogenase LpdC (lipoamide reductase (NADH)) (lipoyl dehydrogenase) (dihydrolipoyl dehydrogenase) (diaphorase)                                                                                                                                                                       | sp P0A9P0 DLDH_ECOLI            | gi 170079753                  | YFL018C                         | Not found             | sp O08749 DLDH_MOUSE   | tr Q9VVL7 Q9VVL7_DROME         |
| gi 15607609                  | Rv0468  | (BHBD)                                                                                                                                                                                                                                                                                                   | Not found                       | Not found                     | Not found                       | Not found             | sp Q61425 HCDH_MOUSE   | Not found                      |
| gi 15607651                  | Rv0510  | Probable porphobilinogen deaminase HemC (PBG) (hydroxymethylbilane synthase) (HMBS) (pre-uroporphyrinogen synthase)                                                                                                                                                                                      | sp P06983 HEM3_ECOLI            | gi 170083288                  | Not found                       | Not found             | Not found              | Not found                      |
| gi 15607688                  | Rv0548c | Naphthoate synthase MenB (dihydroxynaphthoic acid synthetase) (DHNA synthetase)                                                                                                                                                                                                                          | sp P0ABU0 MENB_ECOLI            | gi 170081881                  | Not found                       | Not found             | Not found              | Not found                      |
| gi 15607706                  | Rv0566c | hypothetical protein                                                                                                                                                                                                                                                                                     | sp P0A8E7 YAJQ_ECOLI            | gi 170080012                  | Not found                       | Not found             | Not found              | Not found                      |
| gi 15607780                  | Rv0640  | 50S ribosomal protein L11 RplK                                                                                                                                                                                                                                                                           | sp P0A7J7 RL11_ECOLI            | gi 170083443                  | Not found                       | Not found             | Not found              | Not found                      |
| gi 15607784                  | Rv0644c | Methoxy mycolic acid synthase 2 MmaA2 (methyl mycolic acid synthase 2) (MMA2) (hydroxy mycolic acid synthase)                                                                                                                                                                                            | sp P0A9H7 CFA_ECOLI             | Not found                     | Not found                       | Not found             | Not found              | Not found                      |
| gi 15607807                  | Rv0667  | DNA-directed RNA polymerase (beta chain) RpoB (transcriptase beta chain) (RNA polymerase beta subunit)                                                                                                                                                                                                   | sp P0A8V2 RPOB_ECOLI            | gi 170083447                  | Not found                       | Not found             | Not found              | Not found                      |
| gi 15607808                  | Rv0668  | DNA-directed RNA polymerase (beta' chain) RpoC (transcriptase beta' chain) (RNA polymerase beta' subunit)                                                                                                                                                                                                | sp P0A8T7 RPOC_ECOLI            | gi 170083448                  | YDL140C                         | Not found             | Not found              | Not found                      |
| gi 15607823                  | Rv0683  | 30S ribosomal protein S7 RpsG                                                                                                                                                                                                                                                                            | sp P02359 RS7_ECOLI             | gi 170082859                  | Not found                       | sp Q9Y2R9 RT07_HUMAN  | Not found              | Not found                      |
| gi 15607825                  | Rv0685  | Probable iron-regulated elongation factor TU Tuf (EF-TU)                                                                                                                                                                                                                                                 | Not found                       | Not found                     | Not found                       | sp P49411 EFTU_HUMAN  | Not found              | Not found                      |
| gi 15607840                  | Rv0700  | 30S ribosomal protein S10 RpsJ (transcription antitermination factor NusE)                                                                                                                                                                                                                               | sp P0A7R5 RS10_ECOLI            | gi 170082840                  | Not found                       | Not found             | Not found              | Not found                      |
| gi 15607841                  | Rv0701  | 50S ribosomal protein L3 RplC                                                                                                                                                                                                                                                                            | sp P60438 RL3_ECOLI             | gi 170082839                  | Not found                       | Not found             | Not found              | Not found                      |
| gi 15607842                  | Rv0702  | 50S ribosomal protein L4 RplD                                                                                                                                                                                                                                                                            | sp P60723 RL4_ECOLI             | gi 170082838                  | Not found                       | Not found             | Not found              | Not found                      |
| gi 15607846                  | Rv0706  | 50S ribosomal protein L22 RplV                                                                                                                                                                                                                                                                           | sp P61175 RL22_ECOLI            | gi 170082834                  | Not found                       | Not found             | Not found              | Not found                      |
| gi 15607847                  | Rv0707  | 30S ribosomal protein S3 RpsC                                                                                                                                                                                                                                                                            | sp P0A7V3 RS3_ECOLI             | Not found                     | Not found                       | Not found             | Not found              | Not found                      |
| gi 15607854                  | Rv0714  | 50S ribosomal protein L14 RplN                                                                                                                                                                                                                                                                           | sp P0ADY3 RL14_ECOLI            | gi 170082830                  | Not found                       | Not found             | Not found              | sp P48159 RL23_DROME           |
| gi 15607855                  | Rv0715  | 50S ribosomal protein L24 RplX                                                                                                                                                                                                                                                                           | sp P60624 RL24_ECOLI            | gi 170082829                  | Not found                       | Not found             | sp Q9CQ06 RM24_MOUSE   | Not found                      |
| gi 15607856                  | Rv0716  | 50S ribosomal protein L5 RplE                                                                                                                                                                                                                                                                            | sp P62399 RL5_ECOLI             | gi 170082828                  | YPR102C                         | Not found             | Not found              | Not found                      |
| gi 15607858                  | Rv0718  | 30S ribosomal protein S8 RpsH                                                                                                                                                                                                                                                                            | sp P0A7W7 RS8_ECOLI             | gi 170082826                  | YJL190C                         | Not found             | Not found              | Not found                      |
| gi 15607859                  | Rv0719  | 50S ribosomal protein L6 RplF                                                                                                                                                                                                                                                                            | Not found                       | Not found                     | YNL067W                         | Not found             | Not found              | Not found                      |
| gi 15607862                  | Rv0722  | 50S ribosomal protein L30 RplM                                                                                                                                                                                                                                                                           | sp P0AG51 RL30_ECOLI            | gi 170082822                  | Not found                       | Not found             | Not found              | Not found                      |
| gi 15607873                  | Rv0733  | Adenylate kinase Adk (ATP-AMP transphosphorylase)                                                                                                                                                                                                                                                        | sp P69441 KAD_ECOLI             | gi 170080059                  | YDR226W                         | Not found             | sp Q9WTP7 KAD3_MOUSE   | Not found                      |
| gi 15607893                  | Rv0753c | Probable methylmalonate-semialdehyde dehydrogenase MmsA (methylmalonic acid semialdehyde dehydrogenase) (MMSDH)                                                                                                                                                                                          | Not found                       | Not found                     | Not found                       | sp Q02252 MMSA_HUMAN  | sp Q9EQ20 MMSA_MOUSE   | Not found                      |
| gi 15607913                  | Rv0773c | Probable bifunctional acylase GgtA: cephalosporin acylase (GL-7ACA acylase) + gamma-glutamyltranspeptidase (GGT)                                                                                                                                                                                         | sp P18956 GGT_ECOLI             | Not found                     | Not found                       | Not found             | Not found              | Not found                      |
| gi 15607961                  | Rv0821c | Probable phosphate-transport system transcriptional regulatory protein PhoY2                                                                                                                                                                                                                             | sp P0A9K7 PHOU_ECOLI            | Not found                     | Not found                       | Not found             | Not found              | Not found                      |
| gi 15607998                  | Rv0858c | Probable N-succinyl-diaminopimelate aminotransferase DapC (DAP-at)                                                                                                                                                                                                                                       | sp P77806 YBDL_ECOLI            | Not found                     | Not found                       | Not found             | sp Q8BGT5 ALAT2_MOUSE  | Not found                      |
| gi 15608000                  | Rv0860  | Probable fatty oxidation protein FadB                                                                                                                                                                                                                                                                    | sp P77399 FADJ_ECOLI            | Not found                     | Not found                       | Not found             | Not found              | tr Q8IPE8 Q8IPE8_DROME         |
| gi 15608013                  | Rv0873  | Probable acyl-CoA dehydrogenase FadE10                                                                                                                                                                                                                                                                   | Not found                       | Not found                     | Not found                       | Not found             | sp Q8JZN5 ACAD9_MOUSE  | tr A1ZBJ2 A1ZBJ2_DROME         |
| gi 15608036                  | Rv0896  | Probable citrate synthase I GltA2                                                                                                                                                                                                                                                                        | sp P0ABH7 CISY_ECOLI            | gi 170080387                  | YNR001C                         | Not found             | sp Q9CZU6 CISY_MOUSE   | Not found                      |
| gi 15608086                  | Rv0946c | Probable glucose-6-phosphate isomerase Pgi (GPI) (phosphoglucose isomerase) (phosphohexose isomerase) (phi)                                                                                                                                                                                              | sp P0A6T1 G6PI_ECOLI            | gi 170083482                  | YBR196C                         | sp P06744 G6PI_HUMAN  | sp P06745 G6PI_MOUSE   | Not found                      |
| gi 15608097                  | Rv0957  | Probable bifunctional purine biosynthesis protein PurH: phosphoribosylaminoimidazolecarboxamide formyltransferase (AICAR transformylase) (5'-phosphoribosyl-5-aminoimidazole-4-carboxamide formyltransferase) + inosinemonophosphate cyclodiolase (imp cyclodiolase) (inosinase) (imp synthetase) (ATIC) | sp P15639 PUR9_ECOLI            | gi 170083467                  | Not found                       | Not found             | Not found              | Not found                      |
| gi 15608154                  | Rv1014c | Probable peptidyl-tRNA hydrolase Pth                                                                                                                                                                                                                                                                     | sp P0A7D1 PTH_ECOLI             | gi 170080832                  | Not found                       | Not found             | Not found              | Not found                      |
| gi 15608157                  | Rv1017c | Probable ribose-phosphate pyrophosphokinase PrsA (phosphoribosyl pyrophosphate synthetase) (PRPP synthetase)                                                                                                                                                                                             | sp P0A717 KPRS_ECOLI            | gi 170080835                  | YHL011C                         | Not found             | Not found              | Not found                      |
| gi 15608158                  | Rv1018c | Probable UDP-N-acetylglucosamine pyrophosphorylase GlmU                                                                                                                                                                                                                                                  | sp P0ACC7 GLMU_ECOLI            | gi 170083231                  | Not found                       | Not found             | Not found              | Not found                      |
| gi 15608163                  | Rv1023  | Probable enolase Eno                                                                                                                                                                                                                                                                                     | sp P0A6P9 ENO_ECOLI             | gi 170082351                  | YGR254W                         | sp P06733 ENOA_HUMAN  | Not found              | Not found                      |
| gi 15608210                  | Rv1070c | (crotonase)                                                                                                                                                                                                                                                                                              | Not found                       | Not found                     | Not found                       | Not found             | sp Q8BH95 ECHM_MOUSE   | Not found                      |
| gi 15608211                  | Rv1071c | (crotonase)                                                                                                                                                                                                                                                                                              | Not found                       | Not found                     | Not found                       | Not found             | sp Q8QZS1 HIBCH_MOUSE  | Not found                      |
| gi 15608219                  | Rv1079  | Cystathionine gamma-synthase MetB (CGS) (O-succinylhomoserine [thiol]-lyase)                                                                                                                                                                                                                             | sp P00935 METB_ECOLI            | gi 170083409                  | YAL012W                         | Not found             | Not found              | Not found                      |
| gi 15608238                  | Rv1098c | Probable fumarase Fum (fumarate hydratase)                                                                                                                                                                                                                                                               | Not found                       | Not found                     | YPL262W                         | Not found             | Not found              | Not found                      |
| gi 15608262                  | Rv1122  | Probable 6-phosphogluconate dehydrogenase, decarboxylating Gnd2                                                                                                                                                                                                                                          | sp P00350 PGD_ECOLI             | gi 170081660                  | YHR183W                         | sp P31937 3HIDH_HUMAN | sp Q9DCD0 6PGD_MOUSE   | Not found                      |
| gi 15608385                  | Rv1245c | Probable short-chain type dehydrogenase/reductase                                                                                                                                                                                                                                                        | Not found                       | Not found                     | Not found                       | Not found             | sp Q9EQ06 DHB11_MOUSE  | Not found                      |

|             |         |                                                                                                                                                       |                       |              |           |                        |                       |                      |
|-------------|---------|-------------------------------------------------------------------------------------------------------------------------------------------------------|-----------------------|--------------|-----------|------------------------|-----------------------|----------------------|
| gi 15608416 | Rv1276c | hypothetical protein                                                                                                                                  | sp P76502 SIXA_ECOLI  | Not found    | Not found | Not found              | Not found             | Not found            |
| gi 15608432 | Rv1292  | Probable arginyl-tRNA synthetase ArgS (ARGRS) (arginine--tRNA ligase)                                                                                 | Not found             | Not found    | YDR341C   | Not found              | Not found             | Not found            |
| gi 15608437 | Rv1297  | Probable transcription termination factor Rho homolog                                                                                                 | sp P0AG30 RHO_ECOLI   | gi 170083270 | Not found | Not found              | Not found             | Not found            |
| gi 15608448 | Rv1308  | Probable ATP synthase alpha chain AtpA                                                                                                                | Not found             | Not found    | Not found | Not found              | sp Q03265 ATPA_MOUSE  | sp P35381 ATPA_DROME |
| gi 15608455 | Rv1315  | Probable UDP-N-acetylglucosamine 1-carboxyvinyltransferase MurA                                                                                       | sp P0A749 MURA_ECOLI  | Not found    | Not found | Not found              | Not found             | Not found            |
| gi 15608468 | Rv1328  | Probable glycogen phosphorylase GlgP                                                                                                                  | sp P0AC86 PHSG_ECOLI  | Not found    | Not found | Not found              | Not found             | Not found            |
| gi 15608523 | Rv1383  | Probable carbamoyl-phosphate synthase small chain CarA (carbamoyl-phosphate synthetase glutamine chain)                                               | sp P0A6F1 CARA_ECOLI  | gi 170079695 | Not found | Not found              | Not found             | Not found            |
| gi 15608531 | Rv1392  | Probable S-adenosylmethionine synthetase MetK (mat) (AdoMet synthetase) (methionine adenosyltransferase)                                              | sp P0A817 METK_ECOLI  | gi 170082496 | YDR502C   | Not found              | sp Q91X83 METK1_MOUSE | Not found            |
| gi 15608542 | Rv1404  | Probable transcriptional regulatory protein                                                                                                           | sp P27245 MARR_ECOLI  | Not found    | Not found | Not found              | Not found             | Not found            |
| gi 15608574 | Rv1436  | Probable glyceraldehyde 3-phosphate dehydrogenase Gap (GAPDH)                                                                                         | sp P0A9B2 G3P1_ECOLI  | gi 170081435 | YGR192C   | sp P04406 G3P_HUMAN    | Not found             | Not found            |
| gi 15608576 | Rv1438  | Probable triosephosphate isomerase Tpi (TIM)                                                                                                          | Not found             | Not found    | YDR050C   | Not found              | sp P17751 TPIS_MOUSE  | Not found            |
| gi 15608586 | Rv1448c | Probable transaldolase Tal                                                                                                                            | sp P0A867 TALA_ECOLI  | gi 170079671 | YLR354C   | Not found              | sp Q93092 TALDO_MOUSE | Not found            |
| gi 15608587 | Rv1449c | Transketolase Tkt (TK)                                                                                                                                | sp P33570 TKT2_ECOLI  | gi 170082489 | Not found | Not found              | Not found             | Not found            |
| gi 15608613 | Rv1475c | Probable iron-regulated aconitate hydratase Acn (citrate hydro-lyase) (aconitase)                                                                     | sp P25516 ACON1_ECOLI | gi 170080955 | YLR304C   | Not found              | sp Q99KI0 ACON_MOUSE  | Not found            |
| gi 15608621 | Rv1483  | 3-oxoacyl-[acyl-carrier protein] reductase FabG1 (3-ketoacyl-acyl carrier protein reductase) (mycolic acid biosynthesis a protein)                    | sp P0AEK2 FABG_ECOLI  | gi 170080744 | Not found | Not found              | Not found             | Not found            |
| gi 15608622 | Rv1484  | reductase)                                                                                                                                            | sp P0AEK4 FABI_ECOLI  | gi 170080967 | Not found | Not found              | Not found             | Not found            |
| gi 15608626 | Rv1488  | Possible exported conserved protein                                                                                                                   | sp P0ABC7 HFLK_ECOLI  | Not found    | Not found | Not found              | Not found             | Not found            |
| gi 15608682 | Rv1544  | Possible ketoacyl reductase                                                                                                                           | sp P39831 YDFG_ECOLI  | gi 170081206 | Not found | Not found              | sp O70503 DHB12_MOUSE | Not found            |
| gi 15608741 | Rv1603  | Probable phosphoribosylformimino-5-aminoimidazole carboxamide ribotide isomerase HisA                                                                 | Not found             | gi 170081656 | Not found | Not found              | Not found             | Not found            |
| gi 15608755 | Rv1617  | Probable pyruvate kinase PykA                                                                                                                         | sp P0AD61 KPYK1_ECOLI | gi 170081336 | YAL038W   | Not found              | Not found             | Not found            |
| gi 15608767 | Rv1629  | Probable DNA polymerase I PolA                                                                                                                        | sp P00582 DPO1_ECOLI  | gi 170083336 | Not found | Not found              | Not found             | Not found            |
| gi 15608779 | Rv1641  | Probable initiation factor if-3 InfC                                                                                                                  | sp P0A707 IF3_ECOLI   | Not found    | Not found | Not found              | Not found             | Not found            |
| gi 15608788 | Rv1650  | Probable phenylalanyl-tRNA synthetase, beta chain PheT                                                                                                | Not found             | Not found    | Not found | Not found              | sp Q9WUA2 SYFB_MOUSE  | Not found            |
| gi 15608792 | Rv1654  | Probable acetylglutamate kinase ArgB                                                                                                                  | Not found             | Not found    | YER069W   | Not found              | Not found             | Not found            |
| gi 15608793 | Rv1655  | Probable acetylornithine aminotransferase ArgD                                                                                                        | sp P18335 ARGD_ECOLI  | Not found    | Not found | Not found              | sp P29758 OAT_MOUSE   | Not found            |
| gi 15608794 | Rv1656  | Probable ornithine carbamoyltransferase, anabolic ArgF                                                                                                | sp P04391 OTC1_ECOLI  | Not found    | Not found | Not found              | Not found             | Not found            |
| gi 15608837 | Rv1699  | Probable CTP synthase PyrG                                                                                                                            | sp P0A7E5 PYRG_ECOLI  | gi 170082352 | Not found | Not found              | Not found             | Not found            |
| gi 15608980 | Rv1843c | (IMPD)                                                                                                                                                | sp P0ADG7 IMDH_ECOLI  | gi 170082118 | YLR432W   | Not found              | Not found             | Not found            |
| gi 15609006 | Rv1869c | Probable reductase                                                                                                                                    | Not found             | gi 170082883 | Not found | Not found              | Not found             | Not found            |
| gi 15609009 | Rv1872c | Possible L-lactate dehydrogenase (cytochrome) LldD2                                                                                                   | Not found             | Not found    | Not found | Not found              | sp Q9WU19 HAOX1_MOUSE | Not found            |
| gi 15609013 | Rv1876  | Probable bacterioferritin BfrA                                                                                                                        | sp P0ABD3 BFR_ECOLI   | Not found    | Not found | Not found              | Not found             | Not found            |
| gi 15609045 | Rv1908c | Catalase-peroxidase-peroxynitritase T KatG                                                                                                            | sp P13029 KATG_ECOLI  | gi 170083412 | Not found | Not found              | Not found             | Not found            |
| gi 15609065 | Rv1928c | Probable short-chain type dehydrogenase/reductase                                                                                                     | Not found             | Not found    | Not found | Not found              | sp Q9WV68 DECR2_MOUSE | Not found            |
| gi 15609069 | Rv1932  | Probable thiol peroxidase Tpx                                                                                                                         | sp P0A862 TPX_ECOLI   | gi 170081002 | Not found | Not found              | Not found             | Not found            |
| gi 15609166 | Rv2029c | 6-phosphofructokinase PfkB (phosphohexokinase) (phosphofructokinase)                                                                                  | Not found             | gi 170081380 | Not found | Not found              | Not found             | Not found            |
| gi 15609258 | Rv2121c | ATP phosphoribosyltransferase HisG                                                                                                                    | sp P60757 HIS1_ECOLI  | gi 170081650 | Not found | Not found              | Not found             | Not found            |
| gi 15609324 | Rv2187  | synthase)                                                                                                                                             | Not found             | Not found    | YOR317W   | Not found              | sp Q8JZR0 ACSL5_MOUSE | Not found            |
| gi 15609352 | Rv2215  | DlaT, dihydrolipoamide acyltransferase, E2 component of pyruvate dehydrogenase                                                                        | Not found             | Not found    | YDR148C   | Not found              | Not found             | Not found            |
| gi 15609357 | Rv2220  | Glutamine synthetase GlnA1 (glutamine synthase) (GS-I)                                                                                                | sp P0A9C5 GLNA_ECOLI  | gi 170083342 | Not found | Not found              | Not found             | Not found            |
| gi 15609359 | Rv2222c | Probable glutamine synthetase GlnA2 (glutamine synthase) (GS-II)                                                                                      | Not found             | Not found    | YPR035W   | Not found              | sp P15105 GLNA_MOUSE  | Not found            |
| gi 15609382 | Rv2245  | 3-oxoacyl-[acyl-carrier protein] synthase 1 KasA (beta-ketoacyl-ACP synthase) (KAS I)                                                                 | sp P0A953 FABB_ECOLI  | gi 170080746 | Not found | Not found              | Not found             | Not found            |
| gi 15609417 | Rv2280  | Probable dehydrogenase                                                                                                                                | sp P77748 YDIJ_ECOLI  | Not found    | Not found | Not found              | Not found             | Not found            |
| gi 15609435 | Rv2298  | hypothetical protein                                                                                                                                  | sp P77735 YAJ0_ECOLI  | gi 170082402 | YOR120W   | Not found              | Not found             | Not found            |
| gi 15609436 | Rv2299c | Probable chaperone protein HtpG (heat shock protein) (HSP90 family protein) (high temperature protein G)                                              | Not found             | Not found    | Not found | sp P08238 HS90B_HUMAN  | Not found             | Not found            |
| gi 15609494 | Rv2357c | Probable glycyl-tRNA synthetase GlyS (glycine--tRNA ligase) (GLYRS)                                                                                   | Not found             | Not found    | YBR121C   | sp P41250 SYG_HUMAN    | Not found             | Not found            |
| gi 15609541 | Rv2404c | Probable GTP-binding protein LepA (GTP-binding elongation factor)                                                                                     | sp P60785 LEPA_ECOLI  | gi 170082178 | Not found | Not found              | Not found             | Not found            |
| gi 15609549 | Rv2412  | 30S ribosomal protein S20 RpsT                                                                                                                        | sp P0A7U7 RS20_ECOLI  | gi 170079686 | Not found | Not found              | Not found             | Not found            |
| gi 15609556 | Rv2419c | Glucosyl-3-phosphoglycerate phosphatase GpgP                                                                                                          | sp P0A7A2 GPMB_ECOLI  | gi 170083781 | Not found | Not found              | Not found             | Not found            |
| gi 15609565 | Rv2428  | Alkyl hydroperoxide reductase C protein AhpC (alkyl hydroperoxidase C)                                                                                | sp P0AE08 AHP_C_ECOLI | gi 170080187 | YML028W   | tr Q53HC2 Q53HC2_HUMAN | sp P35700 PRDX1_MOUSE | Not found            |
| gi 15609579 | Rv2442c | 50S ribosomal protein L21 RplU                                                                                                                        | sp P0AG48 RL21_ECOLI  | gi 170082721 | Not found | Not found              | Not found             | Not found            |
| gi 15609585 | Rv2448c | Probable valyl-tRNA synthase protein ValS (valyl-tRNA synthetase) (valine--tRNA ligase) (valine transase)                                             | sp P07118 SYV_ECOLI   | gi 170083697 | Not found | Not found              | Not found             | Not found            |
| gi 15609591 | Rv2454c | Probable oxidoreductase (beta subunit)                                                                                                                | sp P52647 NIFJ_ECOLI  | Not found    | Not found | Not found              | Not found             | Not found            |
| gi 15609599 | Rv2462c | Probable trigger factor (TF) protein Tig                                                                                                              | sp P0A850 TIG_ECOLI   | gi 170080022 | Not found | Not found              | Not found             | Not found            |
| gi 15609614 | Rv2477c | Probable macrolide-transport ATP-binding protein ABC transporter                                                                                      | sp P0A9W3 YJJK_ECOLI  | gi 170083777 | Not found | sp P61221 ABCE1_HUMAN  | sp P61222 ABCE1_MOUSE | Not found            |
| gi 15609638 | Rv2501c | Probable acetyl-/propionyl-coenzyme A carboxylase alpha chain (alpha subunit) AccA1: biotin carboxylase + biotin carboxyl carrier protein (BCCP)      | sp P24182 ACCC_ECOLI  | gi 170082784 | Not found | Not found              | sp Q99MR8 MCCA_MOUSE  | Not found            |
| gi 15609648 | Rv2511  | Oligoribonuclease Orn                                                                                                                                 | sp P0A784 ORN_ECOLI   | gi 170083611 | Not found | Not found              | Not found             | Not found            |
| gi 15609658 | Rv2521  | Probable bacterioferritin comigratory protein Bcp                                                                                                     | sp P0AE52 BCP_ECOLI   | gi 170082090 | Not found | Not found              | Not found             | Not found            |
| gi 15609659 | Rv2522c | hypothetical protein                                                                                                                                  | Not found             | Not found    | YFR044C   | Not found              | Not found             | Not found            |
| gi 15609661 | Rv2524c | Probable fatty acid synthase Fas (fatty acid synthetase)                                                                                              | Not found             | Not found    | YPL231W   | Not found              | Not found             | Not found            |
| gi 15609671 | Rv2534c | Probable elongation factor P Efp                                                                                                                      | sp P0A6N4 EFP_ECOLI   | gi 170083595 | Not found | Not found              | Not found             | Not found            |
| gi 15609675 | Rv2538c | 3-dehydroquinate synthase AroB                                                                                                                        | sp P07639 AROB_ECOLI  | gi 170082906 | Not found | Not found              | Not found             | Not found            |
| gi 15609677 | Rv2540c | Probable chorismate synthase AroF (5-enolpyruvylshikimate-3-phosphate phospholyase)                                                                   | sp P12008 AROC_ECOLI  | gi 170081945 | YGL148W   | Not found              | Not found             | Not found            |
| gi 15609709 | Rv2572c | translase)                                                                                                                                            | sp P21889 SYD_ECOLI   | gi 170081522 | Not found | Not found              | Not found             | Not found            |
| gi 15609718 | Rv2581c | Possible glyoxalase II (hydroxyacylglutathione hydrolase) (GLX II)                                                                                    | sp P75849 YCBL_ECOLI  | Not found    | Not found | sp O95571 ETHE1_HUMAN  | sp Q9DCM0 ETHE1_MOUSE | Not found            |
| gi 15609751 | Rv2614c | ligase)                                                                                                                                               | sp P0A8M3 SYT_ECOLI   | gi 170081377 | YIL078W   | Not found              | Not found             | Not found            |
| gi 15609840 | Rv2703  | RNA polymerase sigma factor SigA (sigma-A)                                                                                                            | sp P00579 RPOD_ECOLI  | Not found    | Not found | Not found              | Not found             | Not found            |
| gi 15609850 | Rv2713  | Probable soluble pyridine nucleotide transhydrogenase SthA (STH) (NAD(P)(+)-transhydrogenase [B-specific]) (nicotinamide nucleotide transhydrogenase) | sp P27306 STHA_ECOLI  | Not found    | Not found | Not found              | Not found             | Not found            |
| gi 15609890 | Rv2753c | Probable dihydrodipicolinate synthase DapA (DHDPS) (dihydrodipicolinate synthetase)                                                                   | sp P0A6L2 DAPA_ECOLI  | gi 170082088 | Not found | Not found              | Not found             | Not found            |
| gi 15609902 | Rv2765  | Probable alanine rich hydrolase                                                                                                                       | sp P56262 DLHH_ECOLI  | Not found    | Not found | Not found              | Not found             | Not found            |

|              |         |                                                                                                                                                                                                                                                             |                       |              |           |                        |                        |                        |
|--------------|---------|-------------------------------------------------------------------------------------------------------------------------------------------------------------------------------------------------------------------------------------------------------------|-----------------------|--------------|-----------|------------------------|------------------------|------------------------|
| gi 15609920  | Rv2783c | Bifunctional protein polyribonucleotide nucleotidyltransferase GpsI: guanosine pentaphosphate synthetase + polyribonucleotide nucleotidyltransferase (polynucleotide phosphorylase) (pnase)                                                                 | sp P05055 PNP_ECOLI   | gi 170082701 | Not found | Not found              | sp Q8K1R3 PNPT1_MOUSE  | Not found              |
| gi 15609922  | Rv2785c | 30S ribosomal protein S15 RpsO                                                                                                                                                                                                                              | sp P0ADZ4 RS15_ECOLI  | gi 170082702 | Not found | Not found              | Not found              | Not found              |
| gi 15610026  | Rv2889c | Probable elongation factor Tsf (EF-ts)                                                                                                                                                                                                                      | sp P0A6P1 EFTS_ECOLI  | gi 170079806 | Not found | Not found              | Not found              | Not found              |
| gi 15610027  | Rv2890c | 30S ribosomal protein S2 RpsB                                                                                                                                                                                                                               | sp P0A7V0 RS2_ECOLI   | gi 170079805 | Not found | Not found              | Not found              | Not found              |
| gi 15610041  | Rv2904c | 50S ribosomal protein L19 RplS                                                                                                                                                                                                                              | sp P0A7K6 RL19_ECOLI  | gi 170082210 | Not found | Not found              | Not found              | Not found              |
| gi 15610056  | Rv2919c | Probable nitrogen regulatory protein P-II GlnB                                                                                                                                                                                                              | sp P0A9Z1 GLNB_ECOLI  | gi 170080036 | Not found | Not found              | Not found              | Not found              |
| gi 15610072  | Rv2935  | Phenolphthiocerol synthesis type-I polyketide synthase PpsE                                                                                                                                                                                                 | sp P0AA19 FABD_ECOLI  | Not found    | Not found | Not found              | Not found              | Not found              |
| gi 15610102  | Rv2965c | Probable phosphopantetheine adenyltransferase KdtB (pantetheine-phosphate adenyltransferase) (PPAT) (dephospho-CoA pyrophosphorylase)                                                                                                                       | sp P0A6I6 COAD_ECOLI  | Not found    | Not found | Not found              | Not found              | Not found              |
| gi 15610123  | Rv2986c | binding protein)                                                                                                                                                                                                                                            | sp P0ACF0 DBHA_ECOLI  | gi 170083461 | Not found | Not found              | Not found              | Not found              |
| gi 15610139  | Rv3002c | (ALS)                                                                                                                                                                                                                                                       | sp P00894 ILVH_ECOLI  | Not found    | Not found | Not found              | Not found              | Not found              |
| gi 15610147  | Rv3010c | Probable 6-phosphofructokinase PfkA (phosphohexokinase) (phosphofructokinase)                                                                                                                                                                               | sp P0A796 K6PF1_ECOLI | gi 170083386 | YGR240C   | Not found              | Not found              | Not found              |
| gi 15610165  | Rv3028c | Probable electron transfer flavoprotein (alpha-subunit) FixB (alpha-ETF) (electron transfer flavoprotein large subunit) (ETFLS)                                                                                                                             | Not found             | Not found    | Not found | Not found              | sp Q99LC5 ETFA_MOUSE   | Not found              |
| gi 15610166  | Rv3029c | Probable electron transfer flavoprotein (beta-subunit) FixA (beta-ETF) (electron transfer flavoprotein small subunit) (ETFSS)                                                                                                                               | Not found             | Not found    | Not found | Not found              | sp Q9DCW4 ETFB_MOUSE   | Not found              |
| gi 15610182  | Rv3045  | Probable NADP-dependent alcohol dehydrogenase AdhC                                                                                                                                                                                                          | sp P75691 YAHK_ECOLI  | Not found    | YMR318C   | Not found              | Not found              | Not found              |
| gi 15610188  | Rv3051c | Ribonucleoside-diphosphate reductase (alpha chain) NrdE (ribonucleotide reductase small subunit) (RIF protein)                                                                                                                                              | sp P00452 RIR1_ECOLI  | gi 170081852 | Not found | Not found              | Not found              | Not found              |
| gi 15610226  | Rv3089  | Probable chain-fatty-acid-CoA ligase FadD13 (fatty-acyl-CoA synthetase)                                                                                                                                                                                     | Not found             | Not found    | Not found | Not found              | sp Q8VCW8 ACSF2_MOUSE  | Not found              |
| gi 15610269  | Rv3133c | Two component transcriptional regulatory protein DevR (probably LuxR/UhpA-family)                                                                                                                                                                           | sp P52106 CSGD_ECOLI  | Not found    | Not found | Not found              | Not found              | Not found              |
| gi 15610285  | Rv3149  | Probable NADH dehydrogenase I (chain E) NuoE (NADH-ubiquinone oxidoreductase chain E)                                                                                                                                                                       | sp P0AFD1 NUOE_ECOLI  | gi 170081902 | Not found | Not found              | sp Q9D6J6 NDUV2_MOUSE  | Not found              |
| gi 15610351  | Rv3215  | biosynthesis)                                                                                                                                                                                                                                               | Not found             | gi 170080174 | Not found | Not found              | Not found              | Not found              |
| gi 15610382  | Rv3246c | Two component sensory transduction transcriptional regulatory protein MtrA                                                                                                                                                                                  | sp P0AA16 OMPR_ECOLI  | Not found    | Not found | Not found              | Not found              | Not found              |
| gi 15610382  | Rv3246c | Two component sensory transduction transcriptional regulatory protein MtrA                                                                                                                                                                                  | Not found             | gi 170082922 | Not found | Not found              | Not found              | Not found              |
| gi 15610384  | Rv3248c | Probable adenosylhomocysteinase SahH (S-adenosyl-L-homocysteine hydrolase) (adohcysase)                                                                                                                                                                     | Not found             | Not found    | Not found | Not found              | sp P50247 SAHH_MOUSE   | Not found              |
| gi 15610410  | Rv3274c | Probable acyl-CoA dehydrogenase FadE25                                                                                                                                                                                                                      | Not found             | Not found    | Not found | Not found              | sp Q07417 ACADS_MOUSE  | Not found              |
| gi 15610454  | Rv3318  | Probable succinate dehydrogenase (flavoprotein subunit) SdhA (succinic dehydrogenase) (fumarate reductase) (fumarate dehydrogenase) (fumaric hydrogenase)                                                                                                   | sp P0AC41 DHSA_ECOLI  | gi 170080390 | Not found | Not found              | Not found              | Not found              |
| gi 15610472  | Rv3336c | translase)                                                                                                                                                                                                                                                  | sp P00954 SYW_ECOLI   | gi 170082901 | Not found | Not found              | Not found              | Not found              |
| gi 15610475  | Rv3339c | Probable isocitrate dehydrogenase [NADP] IcdI (oxalosuccinate decarboxylase) (IDH) (NADP+-specific ICDH) (IDP)                                                                                                                                              | Not found             | Not found    | YDL066W   | Not found              | sp P54071 IDHP_MOUSE   | Not found              |
| gi 15610476  | Rv3340  | Probable O-acetylhomoserine sulfhydrylase MetC (homocysteine synthase) (O-acetylhomoserine (thiol)-lyase) (OAH sulfhydrylase) (O-acetyl-L-homoserine sulfhydrylase)                                                                                         | Not found             | Not found    | YLR303W   | Not found              | Not found              | Not found              |
| gi 15610492  | Rv3356c | Probable bifunctional protein FolD: methylenetetrahydrofolate dehydrogenase + methylenetetrahydrofolate cyclohydrolase                                                                                                                                      | sp P24186 FOLD_ECOLI  | gi 170080112 | YBR084W   | sp Q6UB35 C1TM_HUMAN   | Not found              | Not found              |
| gi 15610532  | Rv3396c | synthetase)                                                                                                                                                                                                                                                 | sp P04079 GUA_ECOLI   | gi 170082117 | YMR217W   | Not found              | Not found              | Not found              |
| gi 15610554  | Rv3418c | kDa antigen)                                                                                                                                                                                                                                                | sp P0A6F9 CH10_ECOLI  | gi 170083591 | YOR020C   | tr Q9UNM1 Q9UNM1_HUMAN | sp Q64433 CH10_MOUSE   | Not found              |
| gi 15610568  | Rv3432c | Probable glutamate decarboxylase GadB                                                                                                                                                                                                                       | sp P69910 DCEB_ECOLI  | Not found    | Not found | Not found              | Not found              | Not found              |
| gi 15610572  | Rv3436c | Probable glucosamine--fructose-6-phosphate aminotransferase [isomerizing] GlmS (hexosephosphate aminotransferase) (D-fructose-6-phosphate amidotransferase) (GFAT) (L-glutamine-D-fructose-6-phosphate amidotransferase) (glucosamine-6-phosphate synthase) | sp P17169 GLMS_ECOLI  | gi 170081928 | YKL104C   | Not found              | Not found              | Not found              |
| gi 15610579  | Rv3443c | 50S ribosomal protein L13 RplM                                                                                                                                                                                                                              | sp P0AA10 RL13_ECOLI  | gi 170082763 | YNL069C   | Not found              | Not found              | Not found              |
| gi 15610593  | Rv3457c | Probable DNA-directed RNA polymerase (alpha chain) RpoA (transcriptase alpha chain) (RNA polymerase alpha subunit) (DNA-directed RNA nucleotidyltransferase)                                                                                                | sp P0A7Z4 RPOA_ECOLI  | gi 170082815 | Not found | Not found              | Not found              | Not found              |
| gi 15610594  | Rv3458c | 30S ribosomal protein S4 RpsD                                                                                                                                                                                                                               | sp P0A7V8 RS4_ECOLI   | gi 170082816 | Not found | Not found              | Not found              | Not found              |
| gi 15610595  | Rv3459c | 30S ribosomal protein S11 RpsK                                                                                                                                                                                                                              | sp P0A7R9 RS11_ECOLI  | gi 170082817 | Not found | sp P62263 RS14_HUMAN   | tr O70569 O70569_MOUSE | Not found              |
| gi 15610734  | Rv3598c | Lysyl-tRNA synthetase 1 LysS (lysine--tRNA ligase 1) (LysRS 1) (lysine translase)                                                                                                                                                                           | sp P0A8N3 SYK1_ECOLI  | gi 170082451 | YDR037W   | Not found              | Not found              | Not found              |
| gi 15610745  | Rv3609c | GTP cyclohydrolase I FolE (GTP-ch-I)                                                                                                                                                                                                                        | sp P0A6T5 GCHI_ECOLI  | gi 170081775 | Not found | Not found              | Not found              | Not found              |
| gi 15610764  | Rv3628  | Inorganic pyrophosphatase Ppa (pyrophosphate phospho-hydrolase) (PPASE) (inorganic diphosphatase) (diphosphate phospho-hydrolase)                                                                                                                           | sp P0A7A9 IPYR_ECOLI  | gi 170083670 | YBR011C   | sp Q15181 IPYR_HUMAN   | Not found              | Not found              |
| gi 15610784  | Rv3648c | Probable cold shock protein A CspA                                                                                                                                                                                                                          | sp P0A972 CSPE_ECOLI  | gi 170080204 | Not found | Not found              | Not found              | Not found              |
| gi 15610803  | Rv3667  | Acetyl-coenzyme A synthetase Acs (acetate--CoA ligase) (acetyl-CoA synthetase) (acetyl-CoA synthase) (acyl-activating enzyme) (acetate thiokinase) (acetyl-activating enzyme) (acetate--coenzyme A ligase) (acetyl-coenzyme A synthase)                     | sp P27550 ACSA_ECOLI  | Not found    | Not found | Not found              | sp Q8BGA8 ACSM5_MOUSE  | Not found              |
| gi 15610812  | Rv3676  | Transcriptional regulatory protein Crp (Crp/Fnr-family)                                                                                                                                                                                                     | sp P0ACJ8 CRP_ECOLI   | gi 170082875 | Not found | Not found              | Not found              | Not found              |
| gi 15610910  | Rv3774  | (crotonase)                                                                                                                                                                                                                                                 | Not found             | Not found    | Not found | Not found              | sp O35459 ECH1_MOUSE   | tr Q9W5W8 Q9W5W8_DROME |
| gi 15610913  | Rv3777  | Probable oxidoreductase                                                                                                                                                                                                                                     | Not found             | Not found    | Not found | Not found              | sp P47199 QOR_MOUSE    | Not found              |
| gi 15610926  | Rv3790  | Decaprenylphosphoryl-beta-D-ribose 2'-oxidase                                                                                                                                                                                                               | Not found             | Not found    | Not found | Not found              | sp P58710 GGLO_MOUSE   | Not found              |
| gi 15610936  | Rv3800c | Polyketide synthase Pks13                                                                                                                                                                                                                                   | Not found             | Not found    | Not found | sp P49327 FAS_HUMAN    | sp P19096 FAS_MOUSE    | Not found              |
| gi 15610974  | Rv3838c | Prephenate dehydratase PheA                                                                                                                                                                                                                                 | sp P0A9J8 PHEA_ECOLI  | gi 170082203 | Not found | Not found              | Not found              | Not found              |
| gi 15610982  | Rv3846  | Superoxide dismutase [FE] SodA                                                                                                                                                                                                                              | sp P00448 SODM_ECOLI  | gi 170083379 | Not found | Not found              | sp P09671 SODM_MOUSE   | Not found              |
| gi 15611050  | Rv3914  | Thioredoxin TrxC (TRX) (MPT46)                                                                                                                                                                                                                              | sp P0AA25 THIO_ECOLI  | gi 170083268 | YGR209C   | sp Q99757 THIOM_HUMAN  | sp P10639 THIO_MOUSE   | Not found              |
| gi 161352467 | Rv1248c | Multifunctional alpha-ketoglutarate metabolic enzyme                                                                                                                                                                                                        | sp P0AFG3 ODO1_ECOLI  | gi 170080392 | YIL125W   | Not found              | Not found              | Not found              |
| gi 448824735 | Rv0005  | DNA gyrase (subunit B) GyrB (DNA topoisomerase (ATP-hydrolysing)) (DNA topoisomerase II) (type II DNA topoisomerase)                                                                                                                                        | sp P0AES6 GYRB_ECOLI  | Not found    | Not found | Not found              | Not found              | Not found              |
| gi 448824753 | Rv1093  | Serine hydroxymethyltransferase 1 GlyA1                                                                                                                                                                                                                     | sp P0A825 GLYA_ECOLI  | gi 170082161 | YBR263W   | Not found              | tr Q9CZN7 Q9CZN7_MOUSE | Not found              |
| gi 448824754 | Rv1099c | Fructose 1,6-bisphosphatase GlpX                                                                                                                                                                                                                            | Not found             | gi 170083395 | Not found | Not found              | Not found              | Not found              |
| gi 448824757 | Rv1416  | Probable riboflavin synthase beta chain RibH (6,7-dimethyl-8-ribityllumazine synthase) (DMRL synthase) (lumazine synthase)                                                                                                                                  | sp P61714 RISB_ECOLI  | gi 170080001 | Not found | Not found              | Not found              | Not found              |
| gi 448824761 | Rv1649  | Probable phenylalanyl-tRNA synthetase, alpha chain PheS                                                                                                                                                                                                     | Not found             | Not found    | YFL022C   | sp O95363 SYFM_HUMAN   | Not found              | Not found              |
| gi 448824781 | Rv2241  | Pyruvate dehydrogenase E1 component AceE (pyruvate decarboxylase) (pyruvate dehydrogenase) (pyruvic dehydrogenase)                                                                                                                                          | sp P0AFG8 ODP1_ECOLI  | gi 170079751 | Not found | Not found              | Not found              | Not found              |
| gi 448824790 | Rv2790c | Probable lipid-transfer protein Ltp1                                                                                                                                                                                                                        | Not found             | Not found    | Not found | Not found              | sp P32020 NLTP_MOUSE   | Not found              |
| gi 448824795 | Rv2993c | Possible 2-hydroxyhepta-2,4-diene-1,7-dioate isomerase (HHDD isomerase)                                                                                                                                                                                     | Not found             | gi 170080808 | YNL168C   | Not found              | sp Q3TC72 FAHD2_MOUSE  | Not found              |

|              |         |                                                                                                                                                 |                      |              |           |                      |                       |           |
|--------------|---------|-------------------------------------------------------------------------------------------------------------------------------------------------|----------------------|--------------|-----------|----------------------|-----------------------|-----------|
| gi 448824796 | Rv3001c | Probable KETOL-acid reductoisomerase IlvC (acetohydroxy-acid isomeroreductase) (alpha-keto-beta-hydroxylacil reductoisomerase)                  | sp P05793 ILVC_ECOLI | gi 170083263 | Not found | Not found            | Not found             | Not found |
| gi 57116686  | Rv0055  | 30S ribosomal protein S18-1 RpsR1                                                                                                               | sp P0A7T7 RS18_ECOLI | gi 170083647 | Not found | Not found            | sp Q8R2L5 RT18C_MOUSE | Not found |
| gi 57116724  | Rv0352  | Probable chaperone protein DnaJ1                                                                                                                | sp P08622 DNAJ_ECOLI | gi 170079678 | Not found | Not found            | Not found             | Not found |
| gi 57116734  | Rv0467  | Isocitrate lyase Icl (isocitrate) (isocitratase)                                                                                                | sp P0A9G6 ACEA_ECOLI | gi 170083472 | Not found | Not found            | Not found             | Not found |
| gi 57116739  | Rv0489  | PGAM)                                                                                                                                           | sp P62707 GPMA_ECOLI | gi 170080415 | YKL152C   | Not found            | sp Q9DBJ1 PGAM1_MOUSE | Not found |
| gi 57116747  | Rv0511  | Probable uroporphyrin-III C-methyltransferase HemD (uroporphyrinogen III methylase) (urogen III methylase) (SUMT) (urogen III methylase) (UROM) | Not found            | gi 170082886 | Not found | Not found            | Not found             | Not found |
| gi 57116764  | Rv0634B | 50S ribosomal protein L33 RpmG2                                                                                                                 | Not found            | gi 170083144 | Not found | Not found            | Not found             | Not found |
| gi 57116768  | Rv0684  | Probable elongation factor G FusA1 (EF-G)                                                                                                       | sp P0A6M8 EFG_ECOLI  | gi 170082858 | YOR133W   | Not found            | sp Q8K0D5 EFGM_MOUSE  | Not found |
| gi 57116779  | Rv0761c | Possible zinc-containing alcohol dehydrogenase NAD dependent AdhB                                                                               | Not found            | gi 170079947 | Not found | sp P11766 ADHX_HUMAN | Not found             | Not found |
| gi 57116800  | Rv0932c | Periplasmic phosphate-binding lipoprotein PstS2 (PBP-2) (PstS2)                                                                                 | sp P0AG82 PSTS_ECOLI | Not found    | Not found | Not found            | Not found             | Not found |
| gi 57116829  | Rv1110  | Probable LYTb-related protein LytB2                                                                                                             | sp P62623 ISPH_ECOLI | Not found    | Not found | Not found            | Not found             | Not found |
| gi 57116832  | Rv1121  | Probable glucose-6-phosphate 1-dehydrogenase Zwf1 (G6PD)                                                                                        | sp P0AC53 G6PD_ECOLI | gi 170081508 | YNL241C   | Not found            | Not found             | Not found |
| gi 57116856  | Rv1384  | Probable carbamoyl-phosphate synthase large chain CarB (carbamoyl-phosphate synthetase ammonia chain)                                           | sp P00968 CARB_ECOLI | gi 170079696 | Not found | Not found            | Not found             | Not found |
| gi 57116994  | Rv2467  | Probable aminopeptidase N PepN (Lysyl aminopeptidase) (LYS-AP) (alanine aminopeptidase)                                                         | sp P04825 AMPN_ECOLI | gi 170080590 | YKL157W   | Not found            | Not found             | Not found |
| gi 57117031  | Rv2861c | Methionine aminopeptidase MapB (map) (peptidase M)                                                                                              | sp P0AE18 MAP1_ECOLI | gi 170079804 | YLR244C   | Not found            | Not found             | Not found |
| gi 57117037  | Rv2922A | Probable acylphosphatase AcyP (acylphosphate phosphohydrolase)                                                                                  | sp P0AB65 ACYP_ECOLI | Not found    | Not found | Not found            | Not found             | Not found |
| gi 57117042  | Rv2996c | Probable D-3-phosphoglycerate dehydrogenase SerA1 (PGDH)                                                                                        | Not found            | Not found    | Not found | Not found            | sp Q61753 SERA_MOUSE  | Not found |
| gi 57117044  | Rv3003c | Acetolactate synthase (large subunit) IlvB1 (acetohydroxy-acid synthase)                                                                        | sp P00893 ILV1_ECOLI | Not found    | Not found | Not found            | Not found             | Not found |
| gi 57117051  | Rv3048c | Ribonucleoside-diphosphate reductase (beta chain) NrdF2 (ribonucleotide reductase small subunit) (R2F protein)                                  | sp P69924 RIR2_ECOLI | gi 170081853 | YJL026W   | Not found            | Not found             | Not found |
| gi 57117168  | Rv3907c | Probable poly(A) polymerase PcnA (polynucleotide adenyllyltransferase) (NTP polymerase) (RNA adenylating enzyme) (poly(A) polymerase)           | sp P0ABF1 PCNB_ECOLI | gi 170079780 | Not found | Not found            | Not found             | Not found |
