# Supplementary material
Source: PubMed Central journal article supplement (PMC4390261)
Supplement: supp_M114.045922_mcp.M114.045922-4.pdf [file supp_M114.045922_mcp.M114.045922-4.pdf]

**Table S3A. Classification of succinylated proteins according to their GO function.**

| Protein_ID  | Type               | GO_Term                                                                                    | GO_ID      |
|-------------|--------------------|--------------------------------------------------------------------------------------------|------------|
| gi 15607148 | biological_process | ATP catabolic process                                                                      | GO:0006200 |
| gi 15607148 | biological_process | DNA topological change                                                                     | GO:0006265 |
| gi 15607151 | biological_process | response to iron ion                                                                       | GO:0010039 |
| gi 15607196 | biological_process | cellular response to DNA damage stimulus                                                   | GO:0006974 |
| gi 15607196 | biological_process | response to antibiotic                                                                     | GO:0046677 |
| gi 15607196 | biological_process | protein homotetramerization                                                                | GO:0051289 |
| gi 15607208 | biological_process | glyoxylate cycle                                                                           | GO:0006097 |
| gi 15607208 | biological_process | tricarboxylic acid cycle                                                                   | GO:0006099 |
| gi 15607208 | biological_process | isocitrate metabolic process                                                               | GO:0006102 |
| gi 15607269 | biological_process | growth                                                                                     | GO:0040007 |
| gi 15607279 | biological_process | response to oxidative stress                                                               | GO:0006979 |
| gi 15607279 | biological_process | response to nitrosative stress                                                             | GO:0051409 |
| gi 15607330 | biological_process | branched-chain amino acid biosynthetic process                                             | GO:0009082 |
| gi 15607330 | biological_process | growth                                                                                     | GO:0040007 |
| gi 15607331 | biological_process | negative regulation of transcription, DNA-templated                                        | GO:0045892 |
| gi 15607331 | biological_process | response to copper ion                                                                     | GO:0046688 |
| gi 15607352 | biological_process | cellular response to iron ion starvation                                                   | GO:0010106 |
| gi 15607352 | biological_process | response to host immune response                                                           | GO:0052572 |
| gi 15607382 | biological_process | fatty acid metabolic process                                                               | GO:0006631 |
| gi 15607382 | biological_process | fatty acid biosynthetic process                                                            | GO:0006633 |
| gi 15607383 | biological_process | long-chain fatty-acyl-CoA metabolic process                                                | GO:0035336 |
| gi 15607383 | biological_process | short-chain fatty acid metabolic process                                                   | GO:0046459 |
| gi 15607383 | biological_process | response to antibiotic                                                                     | GO:0046677 |
| gi 15607384 | biological_process | growth of symbiont in host cell                                                            | GO:0044119 |
| gi 15607385 | biological_process | response to host immune response                                                           | GO:0052572 |
| gi 15607475 | biological_process | glucose metabolic process                                                                  | GO:0006006 |
| gi 15607475 | biological_process | dTDP-rhamnose biosynthetic process                                                         | GO:0019305 |
| gi 15607475 | biological_process | growth                                                                                     | GO:0040007 |
| gi 15607475 | biological_process | dTTP metabolic process                                                                     | GO:0046075 |
| gi 15607488 | biological_process | growth                                                                                     | GO:0040007 |
| gi 15607491 | biological_process | response to heat                                                                           | GO:0009408 |
| gi 15607491 | biological_process | growth                                                                                     | GO:0040007 |
| gi 15607491 | biological_process | response to antibiotic                                                                     | GO:0046677 |
| gi 15607491 | biological_process | response to copper ion                                                                     | GO:0046688 |
| gi 15607491 | biological_process | protein autophosphorylation                                                                | GO:0046777 |
| gi 15607491 | biological_process | cellular response to superoxide                                                            | GO:0071451 |
| gi 15607492 | biological_process | cellular response to starvation                                                            | GO:0009267 |
| gi 15607492 | biological_process | growth                                                                                     | GO:0040007 |
| gi 15607498 | biological_process | growth                                                                                     | GO:0040007 |
| gi 15607504 | biological_process | glycolysis                                                                                 | GO:0006096 |
| gi 15607504 | biological_process | protein homotetramerization                                                                | GO:0051289 |
| gi 15607506 | biological_process | growth of symbiont in host cell                                                            | GO:0044119 |
| gi 15607525 | biological_process | growth                                                                                     | GO:0040007 |
| gi 15607541 | biological_process | growth                                                                                     | GO:0040007 |
| gi 15607548 | biological_process | oxidation-reduction process                                                                | GO:0055114 |
| gi 15607551 | biological_process | negative regulation of cytolysis by symbiont of host cells                                 | GO:0001899 |
| gi 15607551 | biological_process | glutamate catabolic process                                                                | GO:0006538 |
| gi 15607551 | biological_process | glutamine catabolic process                                                                | GO:0006543 |
| gi 15607551 | biological_process | pathogenesis                                                                               | GO:0009405 |
| gi 15607551 | biological_process | growth                                                                                     | GO:0040007 |
| gi 15607551 | biological_process | avoidance of host defenses                                                                 | GO:0044413 |
| gi 15607551 | biological_process | protein autophosphorylation                                                                | GO:0046777 |
| gi 15607551 | biological_process | modulation by symbiont of host signal transduction pathway                                 | GO:0052027 |
| gi 15607551 | biological_process | modulation by symbiont of host phagocytosis                                                | GO:0052190 |
| gi 15607551 | biological_process | positive regulation by symbiont of defense-related host reactive oxygen species production | GO:0052369 |
| gi 15607563 | biological_process | growth                                                                                     | GO:0040007 |
| gi 15607564 | biological_process | growth                                                                                     | GO:0040007 |
| gi 15607573 | biological_process | response to oxidative stress                                                               | GO:0006979 |
| gi 15607573 | biological_process | response to hydroperoxide                                                                  | GO:0033194 |
| gi 15607573 | biological_process | cell redox homeostasis                                                                     | GO:0045454 |
| gi 15607573 | biological_process | evasion or tolerance by symbiont of host-produced reactive oxygen species                  | GO:0052059 |
| gi 15607573 | biological_process | evasion or tolerance by symbiont of host-produced nitric oxide                             | GO:0052060 |
| gi 15607573 | biological_process | response to host                                                                           | GO:0075136 |
| gi 15607581 | biological_process | response to hypoxia                                                                        | GO:0001666 |
| gi 15607581 | biological_process | response to heat                                                                           | GO:0009408 |
| gi 15607581 | biological_process | growth                                                                                     | GO:0040007 |
| gi 15607581 | biological_process | adhesion to host                                                                           | GO:0044406 |
| gi 15607586 | biological_process | regulation of gene expression                                                              | GO:0010468 |
| gi 15607586 | biological_process | regulation of fatty acid metabolic process                                                 | GO:0019217 |
| gi 15607603 | biological_process | growth                                                                                     | GO:0040007 |
| gi 15607603 | biological_process | cell redox homeostasis                                                                     | GO:0045454 |
| gi 15607603 | biological_process | oxidation-reduction process                                                                | GO:0055114 |

|             |                    |                                                                       |            |
|-------------|--------------------|-----------------------------------------------------------------------|------------|
| gi 15607609 | biological_process | fatty acid beta-oxidation                                             | GO:0006635 |
| gi 15607609 | biological_process | fatty acid elongation                                                 | GO:0030497 |
| gi 15607609 | biological_process | response to host immune response                                      | GO:0052572 |
| gi 15607616 | biological_process | heterophilic cell-cell adhesion                                       | GO:0007157 |
| gi 15607616 | biological_process | positive regulation by symbiont of host receptor-mediated endocytosis | GO:0044078 |
| gi 15607641 | biological_process | proline biosynthetic process                                          | GO:0006561 |
| gi 15607641 | biological_process | growth                                                                | GO:0040007 |
| gi 15607641 | biological_process | protein homooligomerization                                           | GO:0051260 |
| gi 15607644 | biological_process | response to hypoxia                                                   | GO:0001666 |
| gi 15607644 | biological_process | S-adenosylmethionine metabolic process                                | GO:0046500 |
| gi 15607644 | biological_process | modulation by symbiont of host innate immune response                 | GO:0052167 |
| gi 15607644 | biological_process | Actinobacterium-type cell wall biogenesis                             | GO:0071766 |
| gi 15607644 | biological_process | mycolic acid biosynthetic process                                     | GO:0071768 |
| gi 15607644 | biological_process | mycolate cell wall layer assembly                                     | GO:0071769 |
| gi 15607651 | biological_process | growth                                                                | GO:0040007 |
| gi 15607688 | biological_process | menaquinone biosynthetic process                                      | GO:0009234 |
| gi 15607688 | biological_process | protein hexamerization                                                | GO:0034214 |
| gi 15607688 | biological_process | protein homooligomerization                                           | GO:0051260 |
| gi 15607776 | biological_process | fatty acid biosynthetic process                                       | GO:0006633 |
| gi 15607776 | biological_process | growth                                                                | GO:0040007 |
| gi 15607776 | biological_process | mycolic acid biosynthetic process                                     | GO:0071768 |
| gi 15607780 | biological_process | growth                                                                | GO:0040007 |
| gi 15607782 | biological_process | mycolic acid biosynthetic process                                     | GO:0071768 |
| gi 15607784 | biological_process | mycolic acid biosynthetic process                                     | GO:0071768 |
| gi 15607791 | biological_process | growth                                                                | GO:0040007 |
| gi 15607792 | biological_process | growth                                                                | GO:0040007 |
| gi 15607795 | biological_process | cholesterol import                                                    | GO:0070508 |
| gi 15607807 | biological_process | growth                                                                | GO:0040007 |
| gi 15607808 | biological_process | growth                                                                | GO:0040007 |
| gi 15607823 | biological_process | growth                                                                | GO:0040007 |
| gi 15607825 | biological_process | response to hypoxia                                                   | GO:0001666 |
| gi 15607825 | biological_process | response to iron ion                                                  | GO:0010039 |
| gi 15607825 | biological_process | growth                                                                | GO:0040007 |
| gi 15607840 | biological_process | growth                                                                | GO:0040007 |
| gi 15607841 | biological_process | growth                                                                | GO:0040007 |
| gi 15607842 | biological_process | growth                                                                | GO:0040007 |
| gi 15607844 | biological_process | growth                                                                | GO:0040007 |
| gi 15607845 | biological_process | growth                                                                | GO:0040007 |
| gi 15607846 | biological_process | growth                                                                | GO:0040007 |
| gi 15607847 | biological_process | growth                                                                | GO:0040007 |
| gi 15607854 | biological_process | growth                                                                | GO:0040007 |
| gi 15607855 | biological_process | growth                                                                | GO:0040007 |
| gi 15607856 | biological_process | growth                                                                | GO:0040007 |
| gi 15607858 | biological_process | growth                                                                | GO:0040007 |
| gi 15607859 | biological_process | growth                                                                | GO:0040007 |
| gi 15607862 | biological_process | growth                                                                | GO:0040007 |
| gi 15607873 | biological_process | purine nucleobase metabolic process                                   | GO:0006144 |
| gi 15607873 | biological_process | nucleoside monophosphate metabolic process                            | GO:0009123 |
| gi 15607873 | biological_process | nucleoside diphosphate metabolic process                              | GO:0009132 |
| gi 15607873 | biological_process | nucleoside triphosphate metabolic process                             | GO:0009141 |
| gi 15607873 | biological_process | AMP salvage                                                           | GO:0044209 |
| gi 15607912 | biological_process | growth                                                                | GO:0040007 |
| gi 15607913 | biological_process | glutathione catabolic process                                         | GO:0006751 |
| gi 15607938 | biological_process | growth                                                                | GO:0040007 |
| gi 15607951 | biological_process | growth                                                                | GO:0040007 |
| gi 15607961 | biological_process | dormancy process                                                      | GO:0022611 |
| gi 15608024 | biological_process | growth                                                                | GO:0040007 |
| gi 15608043 | biological_process | growth involved in symbiotic interaction                              | GO:0044110 |
| gi 15608043 | biological_process | response to host immune response                                      | GO:0052572 |
| gi 15608050 | biological_process | negative regulation of growth                                         | GO:0045926 |
| gi 15608067 | biological_process | positive regulation by symbiont of host immune response               | GO:0052556 |
| gi 15608071 | biological_process | pathogenesis                                                          | GO:0009405 |
| gi 15608071 | biological_process | cellular response to phosphate starvation                             | GO:0016036 |
| gi 15608071 | biological_process | negative regulation of protein binding                                | GO:0032091 |
| gi 15608071 | biological_process | positive regulation of catalytic activity                             | GO:0043085 |
| gi 15608071 | biological_process | negative regulation of catalytic activity                             | GO:0043086 |
| gi 15608071 | biological_process | negative regulation of fatty acid biosynthetic process                | GO:0045717 |
| gi 15608086 | biological_process | glycolysis                                                            | GO:0006096 |
| gi 15608086 | biological_process | growth                                                                | GO:0040007 |
| gi 15608091 | biological_process | growth                                                                | GO:0040007 |
| gi 15608092 | biological_process | growth                                                                | GO:0040007 |
| gi 15608097 | biological_process | growth                                                                | GO:0040007 |
| gi 15608112 | biological_process | oxidation-reduction process                                           | GO:0055114 |
| gi 15608114 | biological_process | mycolic acid biosynthetic process                                     | GO:0071768 |
| gi 15608154 | biological_process | growth                                                                | GO:0040007 |

|             |                    |                                                                       |            |
|-------------|--------------------|-----------------------------------------------------------------------|------------|
| gi 15608157 | biological_process | 5-phosphoribose 1-diphosphate biosynthetic process                    | GO:0006015 |
| gi 15608157 | biological_process | ATP catabolic process                                                 | GO:0006200 |
| gi 15608157 | biological_process | growth                                                                | GO:0040007 |
| gi 15608157 | biological_process | protein homooligomerization                                           | GO:0051260 |
| gi 15608158 | biological_process | growth                                                                | GO:0040007 |
| gi 15608158 | biological_process | protein homotrimerization                                             | GO:0070207 |
| gi 15608163 | biological_process | growth                                                                | GO:0040007 |
| gi 15608165 | biological_process | growth                                                                | GO:0040007 |
| gi 15608219 | biological_process | L-methionine biosynthetic process from L-homoserine via cystathionine | GO:0019279 |
| gi 15608219 | biological_process | cysteine biosynthetic process via cystathionine                       | GO:0019343 |
| gi 15608234 | biological_process | growth                                                                | GO:0040007 |
| gi 15608238 | biological_process | growth                                                                | GO:0040007 |
| gi 15608262 | biological_process | growth                                                                | GO:0040007 |
| gi 15608273 | biological_process | growth                                                                | GO:0040007 |
| gi 15608283 | biological_process | acyl-CoA metabolic process                                            | GO:0006637 |
| gi 15608295 | biological_process | vitamin B6 metabolic process                                          | GO:0042816 |
| gi 15608313 | biological_process | coenzyme biosynthetic process                                         | GO:0009108 |
| gi 15608313 | biological_process | response to nitrosative stress                                        | GO:0051409 |
| gi 15608341 | biological_process | growth                                                                | GO:0040007 |
| gi 15608341 | biological_process | protein homooligomerization                                           | GO:0051260 |
| gi 15608341 | biological_process | protein homotrimerization                                             | GO:0070207 |
| gi 15608372 | biological_process | growth                                                                | GO:0040007 |
| gi 15608379 | biological_process | protein homooligomerization                                           | GO:0051260 |
| gi 15608380 | biological_process | carbohydrate metabolic process                                        | GO:0005975 |
| gi 15608380 | biological_process | tricarboxylic acid cycle                                              | GO:0006099 |
| gi 15608386 | biological_process | RNA catabolic process                                                 | GO:0006401 |
| gi 15608386 | biological_process | negative regulation of growth                                         | GO:0045926 |
| gi 15608386 | biological_process | regulation of growth                                                  | GO:0040008 |
| gi 15608399 | biological_process | base-excision repair                                                  | GO:0006284 |
| gi 15608424 | biological_process | growth                                                                | GO:0040007 |
| gi 15608432 | biological_process | growth                                                                | GO:0040007 |
| gi 15608435 | biological_process | threonine biosynthetic process                                        | GO:0009088 |
| gi 15608435 | biological_process | growth                                                                | GO:0040007 |
| gi 15608437 | biological_process | termination of RNA polymerase I transcription                         | GO:0006363 |
| gi 15608437 | biological_process | growth                                                                | GO:0040007 |
| gi 15608437 | biological_process | protein homooligomerization                                           | GO:0051260 |
| gi 15608446 | biological_process | growth                                                                | GO:0040007 |
| gi 15608447 | biological_process | growth                                                                | GO:0040007 |
| gi 15608448 | biological_process | growth                                                                | GO:0040007 |
| gi 15608449 | biological_process | growth                                                                | GO:0040007 |
| gi 15608450 | biological_process | growth                                                                | GO:0040007 |
| gi 15608451 | biological_process | growth                                                                | GO:0040007 |
| gi 15608455 | biological_process | growth                                                                | GO:0040007 |
| gi 15608463 | biological_process | response to host immune response                                      | GO:0052572 |
| gi 15608474 | biological_process | cysteine biosynthetic process                                         | GO:0019344 |
| gi 15608486 | biological_process | siderophore biosynthetic process from catechol                        | GO:0019540 |
| gi 15608490 | biological_process | growth                                                                | GO:0040007 |
| gi 15608520 | biological_process | growth                                                                | GO:0040007 |
| gi 15608523 | biological_process | growth                                                                | GO:0040007 |
| gi 15608527 | biological_process | growth                                                                | GO:0040007 |
| gi 15608530 | biological_process | coenzyme A biosynthetic process                                       | GO:0015937 |
| gi 15608530 | biological_process | growth                                                                | GO:0040007 |
| gi 15608531 | biological_process | growth                                                                | GO:0040007 |
| gi 15608574 | biological_process | growth                                                                | GO:0040007 |
| gi 15608575 | biological_process | growth                                                                | GO:0040007 |
| gi 15608576 | biological_process | gluconeogenesis                                                       | GO:0006094 |
| gi 15608576 | biological_process | glycolysis                                                            | GO:0006096 |
| gi 15608576 | biological_process | growth                                                                | GO:0040007 |
| gi 15608586 | biological_process | growth                                                                | GO:0040007 |
| gi 15608587 | biological_process | growth                                                                | GO:0040007 |
| gi 15608613 | biological_process | response to iron ion                                                  | GO:0010039 |
| gi 15608613 | biological_process | growth                                                                | GO:0040007 |
| gi 15608621 | biological_process | short-chain fatty acid metabolic process                              | GO:0046459 |
| gi 15608621 | biological_process | protein homotetramerization                                           | GO:0051289 |
| gi 15608621 | biological_process | oxidation-reduction process                                           | GO:0055114 |
| gi 15608621 | biological_process | mycolic acid biosynthetic process                                     | GO:0071768 |
| gi 15608622 | biological_process | fatty acid elongation                                                 | GO:0030497 |
| gi 15608622 | biological_process | mycolic acid biosynthetic process                                     | GO:0071768 |
| gi 15608630 | biological_process | propionate metabolic process, methylmalonyl pathway                   | GO:0019678 |
| gi 15608631 | biological_process | propionate metabolic process, methylmalonyl pathway                   | GO:0019678 |
| gi 15608674 | biological_process | isoleucyl-tRNA aminoacylation                                         | GO:0006428 |
| gi 15608682 | biological_process | active evasion of host immune response                                | GO:0042783 |
| gi 15608734 | biological_process | NAD biosynthetic process                                              | GO:0009435 |
| gi 15608739 | biological_process | growth                                                                | GO:0040007 |
| gi 15608741 | biological_process | histidine biosynthetic process                                        | GO:0000105 |

|             |                    |                                                         |            |
|-------------|--------------------|---------------------------------------------------------|------------|
| gi 15608741 | biological_process | tryptophan biosynthetic process                         | GO:0000162 |
| gi 15608741 | biological_process | growth                                                  | GO:0040007 |
| gi 15608749 | biological_process | tryptophan biosynthetic process                         | GO:0000162 |
| gi 15608749 | biological_process | growth                                                  | GO:0040007 |
| gi 15608749 | biological_process | 5-phosphoribose 1-diphosphate metabolic process         | GO:0046391 |
| gi 15608755 | biological_process | growth                                                  | GO:0040007 |
| gi 15608767 | biological_process | growth                                                  | GO:0040007 |
| gi 15608768 | biological_process | growth                                                  | GO:0040007 |
| gi 15608769 | biological_process | coenzyme A biosynthetic process                         | GO:0015937 |
| gi 15608769 | biological_process | growth                                                  | GO:0040007 |
| gi 15608774 | biological_process | response to antibiotic                                  | GO:0046677 |
| gi 15608776 | biological_process | cellular response to DNA damage stimulus                | GO:0006974 |
| gi 15608776 | biological_process | response to host immune response                        | GO:0052572 |
| gi 15608776 | biological_process | negative regulation of strand invasion                  | GO:0060543 |
| gi 15608779 | biological_process | growth                                                  | GO:0040007 |
| gi 15608788 | biological_process | growth                                                  | GO:0040007 |
| gi 15608792 | biological_process | growth                                                  | GO:0040007 |
| gi 15608793 | biological_process | growth                                                  | GO:0040007 |
| gi 15608794 | biological_process | arginine biosynthetic process                           | GO:0006526 |
| gi 15608794 | biological_process | growth                                                  | GO:0040007 |
| gi 15608794 | biological_process | protein homotrimerization                               | GO:0070207 |
| gi 15608821 | biological_process | growth                                                  | GO:0040007 |
| gi 15608833 | biological_process | NADP biosynthetic process                               | GO:0006741 |
| gi 15608833 | biological_process | polyphosphate metabolic process                         | GO:0006797 |
| gi 15608833 | biological_process | phosphorylation                                         | GO:0016310 |
| gi 15608833 | biological_process | growth                                                  | GO:0040007 |
| gi 15608833 | biological_process | protein homotetramerization                             | GO:0051289 |
| gi 15608837 | biological_process | growth                                                  | GO:0040007 |
| gi 15608876 | biological_process | growth                                                  | GO:0040007 |
| gi 15608876 | biological_process | response to host immune response                        | GO:0052572 |
| gi 15608958 | biological_process | pathogenesis                                            | GO:0009405 |
| gi 15608958 | biological_process | protein transport by the Sec complex                    | GO:0043952 |
| gi 15608958 | biological_process | growth of symbiont in host cell                         | GO:0044119 |
| gi 15608958 | biological_process | modulation by symbiont of host immune response          | GO:0052553 |
| gi 15608964 | biological_process | regulation of cellular respiration                      | GO:0043457 |
| gi 15608964 | biological_process | negative regulation of glycolysis                       | GO:0045820 |
| gi 15608964 | biological_process | protein autophosphorylation                             | GO:0046777 |
| gi 15608969 | biological_process | growth                                                  | GO:0040007 |
| gi 15608974 | biological_process | glyoxylate cycle                                        | GO:0006097 |
| gi 15608974 | biological_process | coenzyme A metabolic process                            | GO:0015936 |
| gi 15609013 | biological_process | response to iron ion                                    | GO:0010039 |
| gi 15609045 | biological_process | response to oxidative stress                            | GO:0006979 |
| gi 15609045 | biological_process | hydrogen peroxide catabolic process                     | GO:0042744 |
| gi 15609069 | biological_process | response to oxidative stress                            | GO:0006979 |
| gi 15609069 | biological_process | pathogenesis                                            | GO:0009405 |
| gi 15609069 | biological_process | cell redox homeostasis                                  | GO:0045454 |
| gi 15609069 | biological_process | response to nitrosative stress                          | GO:0051409 |
| gi 15609069 | biological_process | oxidation-reduction process                             | GO:0055114 |
| gi 15609117 | biological_process | cellular response to starvation                         | GO:0009267 |
| gi 15609133 | biological_process | cellular response to nitrosative stress                 | GO:0071500 |
| gi 15609139 | biological_process | steroid metabolic process                               | GO:0008202 |
| gi 15609142 | biological_process | response to hypoxia                                     | GO:0001666 |
| gi 15609142 | biological_process | cellular response to nitrosative stress                 | GO:0071500 |
| gi 15609168 | biological_process | response to hypoxia                                     | GO:0001666 |
| gi 15609168 | biological_process | protein folding                                         | GO:0006457 |
| gi 15609168 | biological_process | cellular response to starvation                         | GO:0009267 |
| gi 15609168 | biological_process | response to heat                                        | GO:0009408 |
| gi 15609168 | biological_process | response to iron ion                                    | GO:0010039 |
| gi 15609168 | biological_process | growth of symbiont in host organelle                    | GO:0044121 |
| gi 15609168 | biological_process | negative regulation of growth                           | GO:0045926 |
| gi 15609168 | biological_process | protein autophosphorylation                             | GO:0046777 |
| gi 15609168 | biological_process | protein homooligomerization                             | GO:0051260 |
| gi 15609168 | biological_process | response to nitrosative stress                          | GO:0051409 |
| gi 15609168 | biological_process | response to host immune response                        | GO:0052572 |
| gi 15609168 | biological_process | cellular response to hypoxia                            | GO:0071456 |
| gi 15609168 | biological_process | cellular response to nitrosative stress                 | GO:0071500 |
| gi 15609168 | biological_process | response to host                                        | GO:0075136 |
| gi 15609169 | biological_process | response to hypoxia                                     | GO:0001666 |
| gi 15609169 | biological_process | response to host immune response                        | GO:0052572 |
| gi 15609211 | biological_process | positive regulation by symbiont of host immune response | GO:0052556 |
| gi 15609229 | biological_process | growth                                                  | GO:0040007 |
| gi 15609229 | biological_process | growth                                                  | GO:0040007 |
| gi 15609234 | biological_process | proteasomal protein catabolic process                   | GO:0010498 |
| gi 15609234 | biological_process | response to nitrosative stress                          | GO:0051409 |
| gi 15609234 | biological_process | protein pupylation                                      | GO:0070490 |

|             |                    |                                                            |            |
|-------------|--------------------|------------------------------------------------------------|------------|
| gi 15609246 | biological_process | pathogenesis                                               | GO:0009405 |
| gi 15609246 | biological_process | growth                                                     | GO:0040007 |
| gi 15609246 | biological_process | proteolysis involved in cellular protein catabolic process | GO:0051603 |
| gi 15609249 | biological_process | proteasomal protein catabolic process                      | GO:0010498 |
| gi 15609249 | biological_process | modification-dependent protein catabolic process           | GO:0019941 |
| gi 15609249 | biological_process | protein pupylation                                         | GO:0070490 |
| gi 15609258 | biological_process | growth                                                     | GO:0040007 |
| gi 15609258 | biological_process | protein homooligomerization                                | GO:0051260 |
| gi 15609258 | biological_process | growth                                                     | GO:0040007 |
| gi 15609277 | biological_process | negative regulation of growth                              | GO:0045926 |
| gi 15609282 | biological_process | regulation of cell shape                                   | GO:0008360 |
| gi 15609282 | biological_process | peptidoglycan-based cell wall biogenesis                   | GO:0009273 |
| gi 15609282 | biological_process | growth                                                     | GO:0040007 |
| gi 15609282 | biological_process | protein stabilization                                      | GO:0050821 |
| gi 15609298 | biological_process | growth                                                     | GO:0040007 |
| gi 15609315 | biological_process | growth                                                     | GO:0040007 |
| gi 15609315 | biological_process | protein homooligomerization                                | GO:0051260 |
| gi 15609315 | biological_process | growth                                                     | GO:0040007 |
| gi 15609315 | biological_process | glycolipid biosynthetic process                            | GO:0009247 |
| gi 15609322 | biological_process | long-chain fatty acid metabolic process                    | GO:0001676 |
| gi 15609324 | biological_process | glycolipid biosynthetic process                            | GO:0009247 |
| gi 15609332 | biological_process | growth                                                     | GO:0040007 |
| gi 15609332 | biological_process | growth                                                     | GO:0040007 |
| gi 15609337 | biological_process | growth                                                     | GO:0040007 |
| gi 15609337 | biological_process | growth of symbiont in host organelle                       | GO:0044121 |
| gi 15609347 | biological_process | growth                                                     | GO:0040007 |
| gi 15609347 | biological_process | L-methionine salvage                                       | GO:0071267 |
| gi 15609347 | biological_process | growth                                                     | GO:0040007 |
| gi 15609348 | biological_process | cAMP biosynthetic process                                  | GO:0006171 |
| gi 15609352 | biological_process | pathogenesis                                               | GO:0009405 |
| gi 15609352 | biological_process | growth                                                     | GO:0040007 |
| gi 15609352 | biological_process | cell redox homeostasis                                     | GO:0045454 |
| gi 15609357 | biological_process | glutamine biosynthetic process                             | GO:0006542 |
| gi 15609357 | biological_process | pathogenesis                                               | GO:0009405 |
| gi 15609357 | biological_process | evasion or tolerance of host immune response               | GO:0020012 |
| gi 15609357 | biological_process | growth                                                     | GO:0040007 |
| gi 15609357 | biological_process | protein homooligomerization                                | GO:0051260 |
| gi 15609359 | biological_process | protein homooligomerization                                | GO:0051260 |
| gi 15609381 | biological_process | acyl-CoA metabolic process                                 | GO:0006637 |
| gi 15609381 | biological_process | growth                                                     | GO:0040007 |
| gi 15609382 | biological_process | fatty acid elongation, saturated fatty acid                | GO:0019367 |
| gi 15609382 | biological_process | fatty acid elongation                                      | GO:0030497 |
| gi 15609382 | biological_process | growth                                                     | GO:0040007 |
| gi 15609395 | biological_process | cellular response to hypoxia                               | GO:0071456 |
| gi 15609422 | biological_process | glycerolipid biosynthetic process                          | GO:0045017 |
| gi 15609436 | biological_process | cellular response to superoxide                            | GO:0071451 |
| gi 15609494 | biological_process | growth                                                     | GO:0040007 |
| gi 15609495 | biological_process | response to zinc ion                                       | GO:0010043 |
| gi 15609510 | biological_process | growth                                                     | GO:0040007 |
| gi 15609510 | biological_process | regulation of gene expression                              | GO:0010468 |
| gi 15609521 | biological_process | cellular response to iron ion starvation                   | GO:0010106 |
| gi 15609521 | biological_process | siderophore biosynthetic process from catechol             | GO:0019540 |
| gi 15609528 | biological_process | sulfate assimilation                                       | GO:0000103 |
| gi 15609528 | biological_process | growth                                                     | GO:0040007 |
| gi 15609549 | biological_process | growth                                                     | GO:0040007 |
| gi 15609565 | biological_process | cell redox homeostasis                                     | GO:0045454 |
| gi 15609565 | biological_process | protein homooligomerization                                | GO:0051260 |
| gi 15609565 | biological_process | response to nitrosative stress                             | GO:0051409 |
| gi 15609565 | biological_process | oxidation-reduction process                                | GO:0055114 |
| gi 15609566 | biological_process | cell redox homeostasis                                     | GO:0045454 |
| gi 15609566 | biological_process | protein homotrimerization                                  | GO:0070207 |
| gi 15609579 | biological_process | growth                                                     | GO:0040007 |
| gi 15609581 | biological_process | growth                                                     | GO:0040007 |
| gi 15609585 | biological_process | growth                                                     | GO:0040007 |
| gi 15609591 | biological_process | tricarboxylic acid cycle                                   | GO:0006099 |
| gi 15609599 | biological_process | cellular response to starvation                            | GO:0009267 |
| gi 15609599 | biological_process | response to antibiotic                                     | GO:0046677 |
| gi 15609614 | biological_process | growth                                                     | GO:0040007 |
| gi 15609635 | biological_process | oxaloacetate metabolic process                             | GO:0006107 |
| gi 15609637 | biological_process | growth                                                     | GO:0040007 |
| gi 15609639 | biological_process | acyl-CoA biosynthetic process                              | GO:0071616 |
| gi 15609640 | biological_process | response to hypoxia                                        | GO:0001666 |
| gi 15609648 | biological_process | growth                                                     | GO:0040007 |
| gi 15609661 | biological_process | growth                                                     | GO:0040007 |
| gi 15609664 | biological_process | regulation of growth                                       | GO:0040008 |

|             |                    |                                                         |            |
|-------------|--------------------|---------------------------------------------------------|------------|
| gi 15609670 | biological_process | growth                                                  | GO:0040007 |
| gi 15609671 | biological_process | growth                                                  | GO:0040007 |
| gi 15609674 | biological_process | growth                                                  | GO:0040007 |
| gi 15609674 | biological_process | protein homooligomerization                             | GO:0051260 |
| gi 15609675 | biological_process | aromatic amino acid family biosynthetic process         | GO:0009073 |
| gi 15609675 | biological_process | growth                                                  | GO:0040007 |
| gi 15609677 | biological_process | growth                                                  | GO:0040007 |
| gi 15609692 | biological_process | growth                                                  | GO:0040007 |
| gi 15609743 | biological_process | growth                                                  | GO:0040007 |
| gi 15609743 | biological_process | pyridoxal phosphate biosynthetic process                | GO:0042823 |
| gi 15609751 | biological_process | growth                                                  | GO:0040007 |
| gi 15609760 | biological_process | response to hypoxia                                     | GO:0001666 |
| gi 15609760 | biological_process | growth                                                  | GO:0040007 |
| gi 15609760 | biological_process | regulation of growth                                    | GO:0040008 |
| gi 15609760 | biological_process | cellular response to nitrosative stress                 | GO:0071500 |
| gi 15609760 | biological_process | dormancy entry of symbiont in host                      | GO:0085014 |
| gi 15609761 | biological_process | cellular response to nitrosative stress                 | GO:0071500 |
| gi 15609778 | biological_process | response to cadmium ion                                 | GO:0046686 |
| gi 15609834 | biological_process | growth                                                  | GO:0040007 |
| gi 15609834 | biological_process | dUTP metabolic process                                  | GO:0046080 |
| gi 15609840 | biological_process | pathogenesis                                            | GO:0009405 |
| gi 15609840 | biological_process | response to water                                       | GO:0009415 |
| gi 15609840 | biological_process | growth                                                  | GO:0040007 |
| gi 15609840 | biological_process | response to host immune response                        | GO:0052572 |
| gi 15609848 | biological_process | regulation of transcription, DNA-templated              | GO:0006355 |
| gi 15609848 | biological_process | response to oxidative stress                            | GO:0006979 |
| gi 15609848 | biological_process | siderophore biosynthetic process from catechol          | GO:0019540 |
| gi 15609848 | biological_process | growth                                                  | GO:0040007 |
| gi 15609848 | biological_process | negative regulation of transcription, DNA-templated     | GO:0045892 |
| gi 15609863 | biological_process | lysine biosynthetic process via diaminopimelate         | GO:0009089 |
| gi 15609863 | biological_process | growth                                                  | GO:0040007 |
| gi 15609890 | biological_process | lysine biosynthetic process via diaminopimelate         | GO:0009089 |
| gi 15609890 | biological_process | growth                                                  | GO:0040007 |
| gi 15609890 | biological_process | protein homotetramerization                             | GO:0051289 |
| gi 15609910 | biological_process | lysine biosynthetic process via diaminopimelate         | GO:0009089 |
| gi 15609910 | biological_process | diaminopimelate biosynthetic process                    | GO:0019877 |
| gi 15609910 | biological_process | protein homooligomerization                             | GO:0051260 |
| gi 15609910 | biological_process | protein homotetramerization                             | GO:0051289 |
| gi 15609917 | biological_process | response to hypoxia                                     | GO:0001666 |
| gi 15609917 | biological_process | alanine catabolic process                               | GO:0006524 |
| gi 15609917 | biological_process | protein homooligomerization                             | GO:0051260 |
| gi 15609923 | biological_process | growth                                                  | GO:0040007 |
| gi 15609976 | biological_process | growth                                                  | GO:0040007 |
| gi 15609982 | biological_process | growth                                                  | GO:0040007 |
| gi 15610019 | biological_process | translational termination                               | GO:0006415 |
| gi 15610019 | biological_process | growth                                                  | GO:0040007 |
| gi 15610026 | biological_process | growth                                                  | GO:0040007 |
| gi 15610027 | biological_process | growth                                                  | GO:0040007 |
| gi 15610032 | biological_process | cellular response to iron ion starvation                | GO:0010106 |
| gi 15610032 | biological_process | siderophore transport                                   | GO:0015891 |
| gi 15610041 | biological_process | growth                                                  | GO:0040007 |
| gi 15610056 | biological_process | growth of symbiont in host cell                         | GO:0044119 |
| gi 15610056 | biological_process | protein homotrimerization                               | GO:0070207 |
| gi 15610064 | biological_process | growth                                                  | GO:0040007 |
| gi 15610065 | biological_process | lipid biosynthetic process                              | GO:0008610 |
| gi 15610065 | biological_process | negative regulation by symbiont of host immune response | GO:0052562 |
| gi 15610065 | biological_process | DIM/DIP cell wall layer assembly                        | GO:0071770 |
| gi 15610072 | biological_process | fatty acid biosynthetic process                         | GO:0006633 |
| gi 15610072 | biological_process | DIM/DIP cell wall layer assembly                        | GO:0071770 |
| gi 15610077 | biological_process | L-methylmalonyl-CoA metabolic process                   | GO:0046491 |
| gi 15610077 | biological_process | DIM/DIP cell wall layer assembly                        | GO:0071770 |
| gi 15610077 | biological_process | methyl-branched fatty acid metabolic process            | GO:0097089 |
| gi 15610090 | biological_process | glycolipid biosynthetic process                         | GO:0009247 |
| gi 15610090 | biological_process | DIM/DIP cell wall layer assembly                        | GO:0071770 |
| gi 15610102 | biological_process | coenzyme A biosynthetic process                         | GO:0015937 |
| gi 15610102 | biological_process | protein hexamerization                                  | GO:0034214 |
| gi 15610104 | biological_process | growth                                                  | GO:0040007 |
| gi 15610106 | biological_process | growth                                                  | GO:0040007 |
| gi 15610121 | biological_process | response to hypoxia                                     | GO:0001666 |
| gi 15610121 | biological_process | response to oxidative stress                            | GO:0006979 |
| gi 15610121 | biological_process | pathogenesis                                            | GO:0009405 |
| gi 15610121 | biological_process | stringent response                                      | GO:0015968 |
| gi 15610121 | biological_process | phosphorylation                                         | GO:0016310 |
| gi 15610121 | biological_process | growth                                                  | GO:0040007 |
| gi 15610121 | biological_process | protein autophosphorylation                             | GO:0046777 |

|             |                    |                                                         |            |
|-------------|--------------------|---------------------------------------------------------|------------|
| gi 15610123 | biological_process | cellular response to iron ion starvation                | GO:0010106 |
| gi 15610123 | biological_process | growth                                                  | GO:0040007 |
| gi 15610123 | biological_process | DNA protection                                          | GO:0042262 |
| gi 15610123 | biological_process | nucleoid organization                                   | GO:0090143 |
| gi 15610132 | biological_process | growth                                                  | GO:0040007 |
| gi 15610139 | biological_process | growth                                                  | GO:0040007 |
| gi 15610146 | biological_process | growth                                                  | GO:0040007 |
| gi 15610166 | biological_process | growth                                                  | GO:0040007 |
| gi 15610188 | biological_process | DNA replication                                         | GO:0006260 |
| gi 15610188 | biological_process | deoxyribonucleotide biosynthetic process                | GO:0009263 |
| gi 15610188 | biological_process | growth                                                  | GO:0040007 |
| gi 15610188 | biological_process | oxidation-reduction process                             | GO:0055114 |
| gi 15610223 | biological_process | response to acid                                        | GO:0001101 |
| gi 15610223 | biological_process | growth of symbiont in host cell                         | GO:0044119 |
| gi 15610224 | biological_process | response to acid                                        | GO:0001101 |
| gi 15610224 | biological_process | growth of symbiont in host cell                         | GO:0044119 |
| gi 15610224 | biological_process | negative regulation by symbiont of host immune response | GO:0052562 |
| gi 15610225 | biological_process | response to acid                                        | GO:0001101 |
| gi 15610225 | biological_process | triglyceride biosynthetic process                       | GO:0019432 |
| gi 15610225 | biological_process | growth of symbiont in host cell                         | GO:0044119 |
| gi 15610225 | biological_process | glycerolipid biosynthetic process                       | GO:0045017 |
| gi 15610225 | biological_process | response to nitric oxide                                | GO:0071731 |
| gi 15610226 | biological_process | response to acid                                        | GO:0001101 |
| gi 15610226 | biological_process | growth of symbiont in host cell                         | GO:0044119 |
| gi 15610242 | biological_process | growth                                                  | GO:0040007 |
| gi 15610269 | biological_process | response to hypoxia                                     | GO:0001666 |
| gi 15610269 | biological_process | pathogenesis                                            | GO:0009405 |
| gi 15610269 | biological_process | regulation of fatty acid metabolic process              | GO:0019217 |
| gi 15610269 | biological_process | dormancy process                                        | GO:0022611 |
| gi 15610269 | biological_process | positive regulation of transcription, DNA-templated     | GO:0045893 |
| gi 15610269 | biological_process | cellular response to nitrosative stress                 | GO:0071500 |
| gi 15610269 | biological_process | regulation of response to stress                        | GO:0080134 |
| gi 15610275 | biological_process | growth                                                  | GO:0040007 |
| gi 15610276 | biological_process | growth                                                  | GO:0040007 |
| gi 15610359 | biological_process | regulation of transcription, DNA-templated              | GO:0006355 |
| gi 15610359 | biological_process | response to stress                                      | GO:0006950 |
| gi 15610359 | biological_process | response to oxidative stress                            | GO:0006979 |
| gi 15610359 | biological_process | response to heat                                        | GO:0009408 |
| gi 15610359 | biological_process | cellular response to heat                               | GO:0034605 |
| gi 15610359 | biological_process | response to nitrosative stress                          | GO:0051409 |
| gi 15610359 | biological_process | response to host immune response                        | GO:0052572 |
| gi 15610360 | biological_process | response to iron ion                                    | GO:0010039 |
| gi 15610363 | biological_process | chorismate biosynthetic process                         | GO:0009423 |
| gi 15610382 | biological_process | protein phosphorylation                                 | GO:0006468 |
| gi 15610382 | biological_process | growth of symbiont in host                              | GO:0044117 |
| gi 15610382 | biological_process | positive regulation of transcription, DNA-templated     | GO:0045893 |
| gi 15610384 | biological_process | methionine catabolic process                            | GO:0009087 |
| gi 15610384 | biological_process | growth                                                  | GO:0040007 |
| gi 15610384 | biological_process | adenosine metabolic process                             | GO:0046085 |
| gi 15610384 | biological_process | protein homotetramerization                             | GO:0051289 |
| gi 15610391 | biological_process | growth                                                  | GO:0040007 |
| gi 15610411 | biological_process | growth                                                  | GO:0040007 |
| gi 15610416 | biological_process | carbon fixation                                         | GO:0015977 |
| gi 15610417 | biological_process | carbon fixation                                         | GO:0015977 |
| gi 15610417 | biological_process | growth                                                  | GO:0040007 |
| gi 15610421 | biological_process | carbon fixation                                         | GO:0015977 |
| gi 15610421 | biological_process | growth                                                  | GO:0040007 |
| gi 15610472 | biological_process | growth                                                  | GO:0040007 |
| gi 15610475 | biological_process | glyoxylate cycle                                        | GO:0006097 |
| gi 15610475 | biological_process | tricarboxylic acid cycle                                | GO:0006099 |
| gi 15610475 | biological_process | isocitrate metabolic process                            | GO:0006102 |
| gi 15610492 | biological_process | growth                                                  | GO:0040007 |
| gi 15610525 | biological_process | fatty acid biosynthetic process                         | GO:0006633 |
| gi 15610528 | biological_process | S-adenosylmethionine metabolic process                  | GO:0046500 |
| gi 15610528 | biological_process | mycolic acid biosynthetic process                       | GO:0071768 |
| gi 15610532 | biological_process | growth                                                  | GO:0040007 |
| gi 15610553 | biological_process | response to heat                                        | GO:0009408 |
| gi 15610553 | biological_process | growth                                                  | GO:0040007 |
| gi 15610553 | biological_process | DNA protection                                          | GO:0042262 |
| gi 15610553 | biological_process | protein homooligomerization                             | GO:0051260 |
| gi 15610553 | biological_process | nucleoid organization                                   | GO:0090143 |
| gi 15610554 | biological_process | regulation of transcription, DNA-templated              | GO:0006355 |
| gi 15610554 | biological_process | response to heat                                        | GO:0009408 |
| gi 15610554 | biological_process | cellular response to heat                               | GO:0034605 |
| gi 15610554 | biological_process | growth                                                  | GO:0040007 |

|             |                    |                                                                         |            |
|-------------|--------------------|-------------------------------------------------------------------------|------------|
| gi 15610554 | biological_process | response to antibiotic                                                  | GO:0046677 |
| gi 15610554 | biological_process | protein homooligomerization                                             | GO:0051260 |
| gi 15610572 | biological_process | growth                                                                  | GO:0040007 |
| gi 15610579 | biological_process | growth                                                                  | GO:0040007 |
| gi 15610593 | biological_process | growth                                                                  | GO:0040007 |
| gi 15610594 | biological_process | growth                                                                  | GO:0040007 |
| gi 15610595 | biological_process | growth                                                                  | GO:0040007 |
| gi 15610652 | biological_process | response to host immune response                                        | GO:0052572 |
| gi 15610678 | biological_process | growth of symbiont in host                                              | GO:0044117 |
| gi 15610692 | biological_process | response to host immune response                                        | GO:0052572 |
| gi 15610704 | biological_process | cholesterol catabolic process                                           | GO:0006707 |
| gi 15610704 | biological_process | pathogenesis                                                            | GO:0009405 |
| gi 15610704 | biological_process | response to cholesterol                                                 | GO:0070723 |
| gi 15610705 | biological_process | growth of symbiont in host                                              | GO:0044117 |
| gi 15610706 | biological_process | cholesterol catabolic process                                           | GO:0006707 |
| gi 15610706 | biological_process | growth of symbiont in host                                              | GO:0044117 |
| gi 15610706 | biological_process | protein homooligomerization                                             | GO:0051260 |
| gi 15610717 | biological_process | growth                                                                  | GO:0040007 |
| gi 15610717 | biological_process | terpenoid biosynthetic process, mevalonate-independent                  | GO:0051483 |
| gi 15610719 | biological_process | pathogenesis                                                            | GO:0009405 |
| gi 15610719 | biological_process | stringent response                                                      | GO:0015968 |
| gi 15610719 | biological_process | growth                                                                  | GO:0040007 |
| gi 15610728 | biological_process | heme catabolic process                                                  | GO:0042167 |
| gi 15610733 | biological_process | regulation of transcription, DNA-templated                              | GO:0006355 |
| gi 15610733 | biological_process | response to iron ion                                                    | GO:0010039 |
| gi 15610733 | biological_process | growth                                                                  | GO:0040007 |
| gi 15610733 | biological_process | DNA protection                                                          | GO:0042262 |
| gi 15610733 | biological_process | response to hydrogen peroxide                                           | GO:0042542 |
| gi 15610733 | biological_process | protein homooligomerization                                             | GO:0051260 |
| gi 15610734 | biological_process | growth                                                                  | GO:0040007 |
| gi 15610745 | biological_process | growth                                                                  | GO:0040007 |
| gi 15610764 | biological_process | phosphate-containing compound metabolic process                         | GO:0006796 |
| gi 15610782 | biological_process | growth                                                                  | GO:0040007 |
| gi 15610782 | biological_process | negative regulation of ribonuclease activity                            | GO:0060701 |
| gi 15610784 | biological_process | growth                                                                  | GO:0040007 |
| gi 15610805 | biological_process | growth                                                                  | GO:0040007 |
| gi 15610812 | biological_process | regulation of transcription, DNA-templated                              | GO:0006355 |
| gi 15610812 | biological_process | growth                                                                  | GO:0040007 |
| gi 15610812 | biological_process | negative regulation of transcription, DNA-templated                     | GO:0045892 |
| gi 15610812 | biological_process | positive regulation of transcription, DNA-templated                     | GO:0045893 |
| gi 15610814 | biological_process | regulation of fatty acid metabolic process                              | GO:0019217 |
| gi 15610814 | biological_process | regulation of chaperone-mediated protein complex assembly               | GO:0090034 |
| gi 15610870 | biological_process | response to hypoxia                                                     | GO:0001666 |
| gi 15610870 | biological_process | triglyceride biosynthetic process                                       | GO:0019432 |
| gi 15610870 | biological_process | glycerolipid biosynthetic process                                       | GO:0045017 |
| gi 15610870 | biological_process | response to nitric oxide                                                | GO:0071731 |
| gi 15610897 | biological_process | active evasion of host immune response                                  | GO:0042783 |
| gi 15610926 | biological_process | arabinan biosynthetic process                                           | GO:0035884 |
| gi 15610926 | biological_process | growth                                                                  | GO:0040007 |
| gi 15610926 | biological_process | cell wall polysaccharide biosynthetic process                           | GO:0070592 |
| gi 15610927 | biological_process | arabinan biosynthetic process                                           | GO:0035884 |
| gi 15610927 | biological_process | growth                                                                  | GO:0040007 |
| gi 15610927 | biological_process | cell wall polysaccharide biosynthetic process                           | GO:0070592 |
| gi 15610936 | biological_process | fatty acid elongation, saturated fatty acid                             | GO:0019367 |
| gi 15610936 | biological_process | growth                                                                  | GO:0040007 |
| gi 15610936 | biological_process | protein homooligomerization                                             | GO:0051260 |
| gi 15610936 | biological_process | mycolic acid biosynthetic process                                       | GO:0071768 |
| gi 15610936 | biological_process | mycolate cell wall layer assembly                                       | GO:0071769 |
| gi 15610937 | biological_process | growth                                                                  | GO:0040007 |
| gi 15610937 | biological_process | mycolate cell wall layer assembly                                       | GO:0071769 |
| gi 15610945 | biological_process | Actinobacterium-type cell wall biogenesis                               | GO:0071766 |
| gi 15610961 | biological_process | fatty acid biosynthetic process                                         | GO:0006633 |
| gi 15610961 | biological_process | cellular response to iron ion starvation                                | GO:0010106 |
| gi 15610961 | biological_process | response to host immune response                                        | GO:0052572 |
| gi 15610974 | biological_process | L-phenylalanine biosynthetic process from chorismate via phenylpyruvate | GO:0033585 |
| gi 15610974 | biological_process | protein homotetramerization                                             | GO:0051289 |
| gi 15610982 | biological_process | response to oxidative stress                                            | GO:0006979 |
| gi 15610982 | biological_process | pathogenesis                                                            | GO:0009405 |
| gi 15610982 | biological_process | protein homotetramerization                                             | GO:0051289 |
| gi 15610985 | biological_process | regulation of transcription, DNA-templated                              | GO:0006355 |
| gi 15610985 | biological_process | regulation of protein secretion                                         | GO:0050708 |
| gi 15610985 | biological_process | response to host immune response                                        | GO:0052572 |
| gi 15610988 | biological_process | regulation of transcription, DNA-templated                              | GO:0006355 |
| gi 15610994 | biological_process | growth                                                                  | GO:0040007 |
| gi 15610995 | biological_process | growth                                                                  | GO:0040007 |



|              |                    |                                                                                   |            |
|--------------|--------------------|-----------------------------------------------------------------------------------|------------|
| gi 15611000  | biological_process | growth of symbiont in host                                                        | GO:0044117 |
| gi 15611016  | biological_process | negative regulation by symbiont of host innate immune response                    | GO:0052170 |
| gi 15611017  | biological_process | pathogenesis                                                                      | GO:0009405 |
| gi 15611017  | biological_process | protein secretion by the type VII secretion system                                | GO:0044315 |
| gi 15611050  | biological_process | cell redox homeostasis                                                            | GO:0045454 |
| gi 161352467 | biological_process | tricarboxylic acid cycle                                                          | GO:0006099 |
| gi 161352467 | biological_process | 2-oxoglutarate metabolic process                                                  | GO:0006103 |
| gi 161352467 | biological_process | growth                                                                            | GO:0040007 |
| gi 161352467 | biological_process | oxidation-reduction process                                                       | GO:0055114 |
| gi 345462027 | biological_process | leucine biosynthetic process                                                      | GO:0009098 |
| gi 345462027 | biological_process | growth                                                                            | GO:0040007 |
| gi 448824735 | biological_process | growth                                                                            | GO:0040007 |
| gi 448824753 | biological_process | glycine metabolic process                                                         | GO:0006544 |
| gi 448824753 | biological_process | L-serine metabolic process                                                        | GO:0006563 |
| gi 448824753 | biological_process | active evasion of host immune response                                            | GO:0042783 |
| gi 448824754 | biological_process | gluconeogenesis                                                                   | GO:0006094 |
| gi 448824757 | biological_process | growth                                                                            | GO:0040007 |
| gi 448824761 | biological_process | growth                                                                            | GO:0040007 |
| gi 448824781 | biological_process | oxidation-reduction process                                                       | GO:0055114 |
| gi 448824785 | biological_process | trehalose catabolic process                                                       | GO:0005993 |
| gi 448824796 | biological_process | growth                                                                            | GO:0040007 |
| gi 448824797 | biological_process | growth                                                                            | GO:0040007 |
| gi 448824799 | biological_process | growth                                                                            | GO:0040007 |
| gi 448824799 | biological_process | cellular response to nitrosative stress                                           | GO:0071500 |
| gi 57116704  | biological_process | tricarboxylic acid cycle                                                          | GO:0006099 |
| gi 57116724  | biological_process | regulation of gene expression                                                     | GO:0010468 |
| gi 57116724  | biological_process | growth                                                                            | GO:0040007 |
| gi 57116734  | biological_process | response to acid                                                                  | GO:0001101 |
| gi 57116734  | biological_process | glyoxylate cycle                                                                  | GO:0006097 |
| gi 57116734  | biological_process | isocitrate metabolic process                                                      | GO:0006102 |
| gi 57116734  | biological_process | pathogenesis                                                                      | GO:0009405 |
| gi 57116734  | biological_process | response to acetate                                                               | GO:0010034 |
| gi 57116734  | biological_process | response to host immune response                                                  | GO:0052572 |
| gi 57116734  | biological_process | response to fatty acid                                                            | GO:0070542 |
| gi 57116734  | biological_process | cellular response to hypoxia                                                      | GO:0071456 |
| gi 57116734  | biological_process | maintenance of symbiont tolerance to host environment                             | GO:0075141 |
| gi 57116735  | biological_process | mycolic acid biosynthetic process                                                 | GO:0071768 |
| gi 57116747  | biological_process | growth                                                                            | GO:0040007 |
| gi 57116767  | biological_process | growth                                                                            | GO:0040007 |
| gi 57116768  | biological_process | growth                                                                            | GO:0040007 |
| gi 57116786  | biological_process | growth                                                                            | GO:0040007 |
| gi 57116786  | biological_process | response to host immune response                                                  | GO:0052572 |
| gi 57116800  | biological_process | phosphate ion transport                                                           | GO:0006817 |
| gi 57116903  | biological_process | tricarboxylic acid cycle                                                          | GO:0006099 |
| gi 57116972  | biological_process | cysteine biosynthetic process from serine                                         | GO:0006535 |
| gi 57116987  | biological_process | aminoglycoside antibiotic catabolic process                                       | GO:0030649 |
| gi 57116987  | biological_process | growth of symbiont in host cell                                                   | GO:0044119 |
| gi 57116987  | biological_process | growth of symbiont in host organelle                                              | GO:0044121 |
| gi 57116987  | biological_process | positive regulation by symbiont of host inflammatory response                     | GO:0052035 |
| gi 57116987  | biological_process | modulation by symbiont of host programmed cell death                              | GO:0052040 |
| gi 57116987  | biological_process | modulation by symbiont of defense-related host reactive oxygen species production | GO:0052164 |
| gi 57116987  | biological_process | modulation by symbiont of host innate immune response                             | GO:0052167 |
| gi 57116990  | biological_process | NAD biosynthetic process                                                          | GO:0009435 |
| gi 57116990  | biological_process | growth                                                                            | GO:0040007 |
| gi 57116993  | biological_process | pentose-phosphate shunt, non-oxidative branch                                     | GO:0009052 |
| gi 57117031  | biological_process | methionine metabolic process                                                      | GO:0006555 |
| gi 57117031  | biological_process | protein initiator methionine removal involved in protein maturation               | GO:0035551 |
| gi 57117041  | biological_process | growth                                                                            | GO:0040007 |
| gi 57117042  | biological_process | L-serine biosynthetic process                                                     | GO:0006564 |
| gi 57117042  | biological_process | growth                                                                            | GO:0040007 |
| gi 57117042  | biological_process | protein homotetramerization                                                       | GO:0051289 |
| gi 57117044  | biological_process | branched-chain amino acid biosynthetic process                                    | GO:0009082 |
| gi 57117044  | biological_process | isoleucine biosynthetic process                                                   | GO:0009097 |
| gi 57117044  | biological_process | valine biosynthetic process                                                       | GO:0009099 |
| gi 57117044  | biological_process | growth                                                                            | GO:0040007 |
| gi 57117051  | biological_process | DNA replication                                                                   | GO:0006260 |
| gi 57117051  | biological_process | deoxyribonucleotide biosynthetic process                                          | GO:0009263 |
| gi 57117051  | biological_process | growth                                                                            | GO:0040007 |
| gi 57117081  | biological_process | mannose biosynthetic process                                                      | GO:0019307 |
| gi 57117081  | biological_process | growth                                                                            | GO:0040007 |
| gi 57117081  | biological_process | GDP metabolic process                                                             | GO:0046710 |
| gi 57117128  | biological_process | growth                                                                            | GO:0040007 |
| gi 57117131  | biological_process | growth                                                                            | GO:0040007 |
| gi 57117137  | biological_process | growth                                                                            | GO:0040007 |
| gi 57117147  | biological_process | growth                                                                            | GO:0040007 |

|             |                    |                                       |            |
|-------------|--------------------|---------------------------------------|------------|
| gi 57117168 | biological_process | growth                                | GO:0040007 |
| gi 15607144 | cellular_component | extracellular region                  | GO:0005576 |
| gi 15607144 | cellular_component | cell wall                             | GO:0005618 |
| gi 15607148 | cellular_component | cell wall                             | GO:0005618 |
| gi 15607148 | cellular_component | plasma membrane                       | GO:0005886 |
| gi 15607151 | cellular_component | extracellular region                  | GO:0005576 |
| gi 15607151 | cellular_component | cell wall                             | GO:0005618 |
| gi 15607151 | cellular_component | cytosol                               | GO:0005829 |
| gi 15607151 | cellular_component | plasma membrane                       | GO:0005886 |
| gi 15607186 | cellular_component | plasma membrane                       | GO:0005886 |
| gi 15607195 | cellular_component | cell wall                             | GO:0005618 |
| gi 15607195 | cellular_component | plasma membrane                       | GO:0005886 |
| gi 15607196 | cellular_component | extracellular region                  | GO:0005576 |
| gi 15607196 | cellular_component | plasma membrane                       | GO:0005886 |
| gi 15607198 | cellular_component | cell wall                             | GO:0005618 |
| gi 15607198 | cellular_component | cytosol                               | GO:0005829 |
| gi 15607198 | cellular_component | plasma membrane                       | GO:0005886 |
| gi 15607208 | cellular_component | extracellular region                  | GO:0005576 |
| gi 15607208 | cellular_component | cell wall                             | GO:0005618 |
| gi 15607208 | cellular_component | cytosol                               | GO:0005829 |
| gi 15607208 | cellular_component | plasma membrane                       | GO:0005886 |
| gi 15607223 | cellular_component | plasma membrane                       | GO:0005886 |
| gi 15607230 | cellular_component | cell wall                             | GO:0005618 |
| gi 15607230 | cellular_component | plasma membrane                       | GO:0005886 |
| gi 15607269 | cellular_component | cytosol                               | GO:0005829 |
| gi 15607269 | cellular_component | plasma membrane                       | GO:0005886 |
| gi 15607273 | cellular_component | cytosol                               | GO:0005829 |
| gi 15607290 | cellular_component | cell wall                             | GO:0005618 |
| gi 15607290 | cellular_component | plasma membrane                       | GO:0005886 |
| gi 15607291 | cellular_component | plasma membrane                       | GO:0005886 |
| gi 15607296 | cellular_component | plasma membrane                       | GO:0005886 |
| gi 15607297 | cellular_component | plasma membrane                       | GO:0005886 |
| gi 15607321 | cellular_component | cell wall                             | GO:0005618 |
| gi 15607321 | cellular_component | plasma membrane                       | GO:0005886 |
| gi 15607321 | cellular_component | integral component of plasma membrane | GO:0005887 |
| gi 15607330 | cellular_component | plasma membrane                       | GO:0005886 |
| gi 15607352 | cellular_component | extracellular region                  | GO:0005576 |
| gi 15607352 | cellular_component | cell wall                             | GO:0005618 |
| gi 15607352 | cellular_component | cytosol                               | GO:0005829 |
| gi 15607352 | cellular_component | plasma membrane                       | GO:0005886 |
| gi 15607357 | cellular_component | plasma membrane                       | GO:0005886 |
| gi 15607362 | cellular_component | plasma membrane                       | GO:0005886 |
| gi 15607364 | cellular_component | plasma membrane                       | GO:0005886 |
| gi 15607372 | cellular_component | plasma membrane                       | GO:0005886 |
| gi 15607382 | cellular_component | plasma membrane                       | GO:0005886 |
| gi 15607383 | cellular_component | extracellular region                  | GO:0005576 |
| gi 15607383 | cellular_component | cell wall                             | GO:0005618 |
| gi 15607383 | cellular_component | cytosol                               | GO:0005829 |
| gi 15607383 | cellular_component | plasma membrane                       | GO:0005886 |
| gi 15607384 | cellular_component | cell wall                             | GO:0005618 |
| gi 15607384 | cellular_component | cytosol                               | GO:0005829 |
| gi 15607384 | cellular_component | plasma membrane                       | GO:0005886 |
| gi 15607385 | cellular_component | extracellular region                  | GO:0005576 |
| gi 15607385 | cellular_component | plasma membrane                       | GO:0005886 |
| gi 15607388 | cellular_component | cell wall                             | GO:0005618 |
| gi 15607388 | cellular_component | plasma membrane                       | GO:0005886 |
| gi 15607389 | cellular_component | cell wall                             | GO:0005618 |
| gi 15607389 | cellular_component | plasma membrane                       | GO:0005886 |
| gi 15607407 | cellular_component | plasma membrane                       | GO:0005886 |
| gi 15607411 | cellular_component | cell wall                             | GO:0005618 |
| gi 15607411 | cellular_component | plasma membrane                       | GO:0005886 |
| gi 15607412 | cellular_component | cell wall                             | GO:0005618 |
| gi 15607412 | cellular_component | plasma membrane                       | GO:0005886 |
| gi 15607456 | cellular_component | extracellular region                  | GO:0005576 |
| gi 15607473 | cellular_component | plasma membrane                       | GO:0005886 |
| gi 15607475 | cellular_component | cell wall                             | GO:0005618 |
| gi 15607475 | cellular_component | plasma membrane                       | GO:0005886 |
| gi 15607488 | cellular_component | cell wall                             | GO:0005618 |
| gi 15607491 | cellular_component | extracellular region                  | GO:0005576 |
| gi 15607491 | cellular_component | cell wall                             | GO:0005618 |
| gi 15607491 | cellular_component | cytosol                               | GO:0005829 |
| gi 15607491 | cellular_component | plasma membrane                       | GO:0005886 |
| gi 15607492 | cellular_component | cell wall                             | GO:0005618 |
| gi 15607504 | cellular_component | extracellular region                  | GO:0005576 |
| gi 15607504 | cellular_component | cell wall                             | GO:0005618 |

|             |                    |                                |            |
|-------------|--------------------|--------------------------------|------------|
| gi 15607504 | cellular_component | plasma membrane                | GO:0005886 |
| gi 15607506 | cellular_component | plasma membrane                | GO:0005886 |
| gi 15607525 | cellular_component | cell wall                      | GO:0005618 |
| gi 15607525 | cellular_component | plasma membrane                | GO:0005886 |
| gi 15607530 | cellular_component | cytosol                        | GO:0005829 |
| gi 15607548 | cellular_component | cell wall                      | GO:0005618 |
| gi 15607548 | cellular_component | plasma membrane                | GO:0005886 |
| gi 15607549 | cellular_component | extracellular region           | GO:0005576 |
| gi 15607551 | cellular_component | cytosol                        | GO:0005829 |
| gi 15607551 | cellular_component | plasma membrane                | GO:0005886 |
| gi 15607564 | cellular_component | cytosol                        | GO:0005829 |
| gi 15607564 | cellular_component | plasma membrane                | GO:0005886 |
| gi 15607573 | cellular_component | extracellular region           | GO:0005576 |
| gi 15607573 | cellular_component | cell wall                      | GO:0005618 |
| gi 15607573 | cellular_component | plasma membrane                | GO:0005886 |
| gi 15607580 | cellular_component | plasma membrane                | GO:0005886 |
| gi 15607581 | cellular_component | cell wall                      | GO:0005618 |
| gi 15607581 | cellular_component | cytosol                        | GO:0005829 |
| gi 15607581 | cellular_component | plasma membrane                | GO:0005886 |
| gi 15607586 | cellular_component | cell wall                      | GO:0005618 |
| gi 15607586 | cellular_component | plasma membrane                | GO:0005886 |
| gi 15607598 | cellular_component | plasma membrane                | GO:0005886 |
| gi 15607603 | cellular_component | extracellular region           | GO:0005576 |
| gi 15607603 | cellular_component | cytosol                        | GO:0005829 |
| gi 15607603 | cellular_component | plasma membrane                | GO:0005886 |
| gi 15607603 | cellular_component | pyruvate dehydrogenase complex | GO:0045254 |
| gi 15607609 | cellular_component | cell wall                      | GO:0005618 |
| gi 15607609 | cellular_component | cytosol                        | GO:0005829 |
| gi 15607609 | cellular_component | plasma membrane                | GO:0005886 |
| gi 15607616 | cellular_component | cell wall                      | GO:0005618 |
| gi 15607616 | cellular_component | cytosol                        | GO:0005829 |
| gi 15607616 | cellular_component | plasma membrane                | GO:0005886 |
| gi 15607616 | cellular_component | cell surface                   | GO:0009986 |
| gi 15607641 | cellular_component | plasma membrane                | GO:0005886 |
| gi 15607644 | cellular_component | cytosol                        | GO:0005829 |
| gi 15607644 | cellular_component | plasma membrane                | GO:0005886 |
| gi 15607651 | cellular_component | plasma membrane                | GO:0005886 |
| gi 15607688 | cellular_component | plasma membrane                | GO:0005886 |
| gi 15607691 | cellular_component | plasma membrane                | GO:0005886 |
| gi 15607706 | cellular_component | cytosol                        | GO:0005829 |
| gi 15607706 | cellular_component | plasma membrane                | GO:0005886 |
| gi 15607711 | cellular_component | cell wall                      | GO:0005618 |
| gi 15607711 | cellular_component | cytosol                        | GO:0005829 |
| gi 15607717 | cellular_component | plasma membrane                | GO:0005886 |
| gi 15607720 | cellular_component | cell wall                      | GO:0005618 |
| gi 15607720 | cellular_component | plasma membrane                | GO:0005886 |
| gi 15607744 | cellular_component | plasma membrane                | GO:0005886 |
| gi 15607771 | cellular_component | extracellular region           | GO:0005576 |
| gi 15607771 | cellular_component | cell wall                      | GO:0005618 |
| gi 15607771 | cellular_component | plasma membrane                | GO:0005886 |
| gi 15607772 | cellular_component | cytosol                        | GO:0005829 |
| gi 15607772 | cellular_component | plasma membrane                | GO:0005886 |
| gi 15607776 | cellular_component | cell wall                      | GO:0005618 |
| gi 15607779 | cellular_component | cell wall                      | GO:0005618 |
| gi 15607779 | cellular_component | plasma membrane                | GO:0005886 |
| gi 15607780 | cellular_component | cell wall                      | GO:0005618 |
| gi 15607781 | cellular_component | cell wall                      | GO:0005618 |
| gi 15607781 | cellular_component | cytosol                        | GO:0005829 |
| gi 15607781 | cellular_component | plasma membrane                | GO:0005886 |
| gi 15607782 | cellular_component | cell wall                      | GO:0005618 |
| gi 15607782 | cellular_component | plasma membrane                | GO:0005886 |
| gi 15607784 | cellular_component | cell wall                      | GO:0005618 |
| gi 15607784 | cellular_component | plasma membrane                | GO:0005886 |
| gi 15607787 | cellular_component | cell wall                      | GO:0005618 |
| gi 15607787 | cellular_component | cytosol                        | GO:0005829 |
| gi 15607787 | cellular_component | plasma membrane                | GO:0005886 |
| gi 15607791 | cellular_component | cell wall                      | GO:0005618 |
| gi 15607791 | cellular_component | plasma membrane                | GO:0005886 |
| gi 15607792 | cellular_component | cell wall                      | GO:0005618 |
| gi 15607792 | cellular_component | cytosol                        | GO:0005829 |
| gi 15607792 | cellular_component | plasma membrane                | GO:0005886 |
| gi 15607795 | cellular_component | cell wall                      | GO:0005618 |
| gi 15607795 | cellular_component | plasma membrane                | GO:0005886 |
| gi 15607807 | cellular_component | cell wall                      | GO:0005618 |
| gi 15607807 | cellular_component | cytosol                        | GO:0005829 |









|             |                    |                                       |            |
|-------------|--------------------|---------------------------------------|------------|
| gi 15609234 | cellular_component | plasma membrane                       | GO:0005886 |
| gi 15609234 | cellular_component | cell wall                             | GO:0005618 |
| gi 15609234 | cellular_component | plasma membrane                       | GO:0005886 |
| gi 15609234 | cellular_component | cell wall                             | GO:0005618 |
| gi 15609246 | cellular_component | extracellular region                  | GO:0005576 |
| gi 15609246 | cellular_component | plasma membrane                       | GO:0005886 |
| gi 15609249 | cellular_component | extracellular region                  | GO:0005576 |
| gi 15609249 | cellular_component | integral component of plasma membrane | GO:0005887 |
| gi 15609249 | cellular_component | cytosol                               | GO:0005829 |
| gi 15609258 | cellular_component | plasma membrane                       | GO:0005886 |
| gi 15609258 | cellular_component | cell wall                             | GO:0005618 |
| gi 15609282 | cellular_component | cell pole                             | GO:0060187 |
| gi 15609282 | cellular_component | extracellular region                  | GO:0005576 |
| gi 15609282 | cellular_component | plasma membrane                       | GO:0005886 |
| gi 15609282 | cellular_component | cell wall                             | GO:0005618 |
| gi 15609296 | cellular_component | extracellular region                  | GO:0005576 |
| gi 15609303 | cellular_component | cell wall                             | GO:0005618 |
| gi 15609315 | cellular_component | plasma membrane                       | GO:0005886 |
| gi 15609319 | cellular_component | cell wall                             | GO:0005618 |
| gi 15609319 | cellular_component | plasma membrane                       | GO:0005886 |
| gi 15609322 | cellular_component | cell wall                             | GO:0005618 |
| gi 15609324 | cellular_component | plasma membrane                       | GO:0005886 |
| gi 15609324 | cellular_component | plasma membrane                       | GO:0005886 |
| gi 15609332 | cellular_component | plasma membrane                       | GO:0005886 |
| gi 15609332 | cellular_component | integral component of plasma membrane | GO:0005887 |
| gi 15609333 | cellular_component | cell wall                             | GO:0005618 |
| gi 15609333 | cellular_component | integral component of plasma membrane | GO:0005887 |
| gi 15609333 | cellular_component | extracellular region                  | GO:0005576 |
| gi 15609337 | cellular_component | extracellular region                  | GO:0005576 |
| gi 15609337 | cellular_component | cytosol                               | GO:0005829 |
| gi 15609337 | cellular_component | plasma membrane                       | GO:0005886 |
| gi 15609339 | cellular_component | plasma membrane                       | GO:0005886 |
| gi 15609339 | cellular_component | extracellular region                  | GO:0005576 |
| gi 15609339 | cellular_component | plasma membrane                       | GO:0005886 |
| gi 15609339 | cellular_component | cell wall                             | GO:0005618 |
| gi 15609347 | cellular_component | cell wall                             | GO:0005618 |
| gi 15609350 | cellular_component | cytosol                               | GO:0005829 |
| gi 15609350 | cellular_component | plasma membrane                       | GO:0005886 |
| gi 15609352 | cellular_component | cytosol                               | GO:0005829 |
| gi 15609352 | cellular_component | plasma membrane                       | GO:0005886 |
| gi 15609352 | cellular_component | pyruvate dehydrogenase complex        | GO:0045254 |
| gi 15609357 | cellular_component | extracellular region                  | GO:0005576 |
| gi 15609357 | cellular_component | cell wall                             | GO:0005618 |
| gi 15609357 | cellular_component | cytosol                               | GO:0005829 |
| gi 15609357 | cellular_component | plasma membrane                       | GO:0005886 |
| gi 15609359 | cellular_component | plasma membrane                       | GO:0005886 |
| gi 15609381 | cellular_component | cell wall                             | GO:0005618 |
| gi 15609381 | cellular_component | cytosol                               | GO:0005829 |
| gi 15609381 | cellular_component | plasma membrane                       | GO:0005886 |
| gi 15609382 | cellular_component | cell wall                             | GO:0005618 |
| gi 15609382 | cellular_component | cytosol                               | GO:0005829 |
| gi 15609382 | cellular_component | plasma membrane                       | GO:0005886 |
| gi 15609395 | cellular_component | cell wall                             | GO:0005618 |
| gi 15609395 | cellular_component | plasma membrane                       | GO:0005886 |
| gi 15609417 | cellular_component | cell wall                             | GO:0005618 |
| gi 15609417 | cellular_component | plasma membrane                       | GO:0005886 |
| gi 15609433 | cellular_component | cell wall                             | GO:0005618 |
| gi 15609433 | cellular_component | plasma membrane                       | GO:0005886 |
| gi 15609435 | cellular_component | cell wall                             | GO:0005618 |
| gi 15609435 | cellular_component | plasma membrane                       | GO:0005886 |
| gi 15609436 | cellular_component | extracellular region                  | GO:0005576 |
| gi 15609436 | cellular_component | cell wall                             | GO:0005618 |
| gi 15609436 | cellular_component | plasma membrane                       | GO:0005886 |
| gi 15609451 | cellular_component | extracellular region                  | GO:0005576 |
| gi 15609451 | cellular_component | cell wall                             | GO:0005618 |
| gi 15609494 | cellular_component | plasma membrane                       | GO:0005886 |
| gi 15609510 | cellular_component | cell wall                             | GO:0005618 |
| gi 15609528 | cellular_component | cell wall                             | GO:0005618 |
| gi 15609541 | cellular_component | cell wall                             | GO:0005618 |
| gi 15609541 | cellular_component | cytosol                               | GO:0005829 |
| gi 15609542 | cellular_component | plasma membrane                       | GO:0005886 |
| gi 15609546 | cellular_component | plasma membrane                       | GO:0005886 |
| gi 15609549 | cellular_component | cytosol                               | GO:0005829 |
| gi 15609565 | cellular_component | cell wall                             | GO:0005618 |
| gi 15609565 | cellular_component | plasma membrane                       | GO:0005886 |





|             |                    |                                              |            |
|-------------|--------------------|----------------------------------------------|------------|
| gi 15609982 | cellular_component | plasma membrane                              | GO:0005886 |
| gi 15610005 | cellular_component | cell wall                                    | GO:0005618 |
| gi 15610005 | cellular_component | plasma membrane                              | GO:0005886 |
| gi 15610019 | cellular_component | cell wall                                    | GO:0005618 |
| gi 15610019 | cellular_component | plasma membrane                              | GO:0005886 |
| gi 15610026 | cellular_component | cell wall                                    | GO:0005618 |
| gi 15610026 | cellular_component | cytosol                                      | GO:0005829 |
| gi 15610026 | cellular_component | plasma membrane                              | GO:0005886 |
| gi 15610027 | cellular_component | cell wall                                    | GO:0005618 |
| gi 15610027 | cellular_component | plasma membrane                              | GO:0005886 |
| gi 15610032 | cellular_component | plasma membrane                              | GO:0005886 |
| gi 15610038 | cellular_component | plasma membrane                              | GO:0005886 |
| gi 15610041 | cellular_component | plasma membrane                              | GO:0005886 |
| gi 15610046 | cellular_component | plasma membrane                              | GO:0005886 |
| gi 15610056 | cellular_component | plasma membrane                              | GO:0005886 |
| gi 15610065 | cellular_component | plasma membrane                              | GO:0005886 |
| gi 15610072 | cellular_component | cell wall                                    | GO:0005618 |
| gi 15610072 | cellular_component | plasma membrane                              | GO:0005886 |
| gi 15610077 | cellular_component | cell wall                                    | GO:0005618 |
| gi 15610077 | cellular_component | plasma membrane                              | GO:0005886 |
| gi 15610088 | cellular_component | cytosol                                      | GO:0005829 |
| gi 15610088 | cellular_component | plasma membrane                              | GO:0005886 |
| gi 15610090 | cellular_component | cell wall                                    | GO:0005618 |
| gi 15610090 | cellular_component | plasma membrane                              | GO:0005886 |
| gi 15610104 | cellular_component | cell wall                                    | GO:0005618 |
| gi 15610104 | cellular_component | plasma membrane                              | GO:0005886 |
| gi 15610106 | cellular_component | cell wall                                    | GO:0005618 |
| gi 15610106 | cellular_component | plasma membrane                              | GO:0005886 |
| gi 15610106 | cellular_component | cell surface                                 | GO:0009986 |
| gi 15610121 | cellular_component | plasma membrane                              | GO:0005886 |
| gi 15610123 | cellular_component | cell wall                                    | GO:0005618 |
| gi 15610123 | cellular_component | plasma membrane                              | GO:0005886 |
| gi 15610139 | cellular_component | cell wall                                    | GO:0005618 |
| gi 15610139 | cellular_component | plasma membrane                              | GO:0005886 |
| gi 15610146 | cellular_component | plasma membrane                              | GO:0005886 |
| gi 15610147 | cellular_component | cell wall                                    | GO:0005618 |
| gi 15610147 | cellular_component | plasma membrane                              | GO:0005886 |
| gi 15610165 | cellular_component | cell wall                                    | GO:0005618 |
| gi 15610165 | cellular_component | cytosol                                      | GO:0005829 |
| gi 15610165 | cellular_component | plasma membrane                              | GO:0005886 |
| gi 15610166 | cellular_component | cell wall                                    | GO:0005618 |
| gi 15610166 | cellular_component | cytosol                                      | GO:0005829 |
| gi 15610166 | cellular_component | plasma membrane                              | GO:0005886 |
| gi 15610182 | cellular_component | cell wall                                    | GO:0005618 |
| gi 15610182 | cellular_component | cytosol                                      | GO:0005829 |
| gi 15610182 | cellular_component | plasma membrane                              | GO:0005886 |
| gi 15610187 | cellular_component | cell wall                                    | GO:0005618 |
| gi 15610188 | cellular_component | plasma membrane                              | GO:0005886 |
| gi 15610188 | cellular_component | ribonucleoside-diphosphate reductase complex | GO:0005971 |
| gi 15610198 | cellular_component | cell wall                                    | GO:0005618 |
| gi 15610212 | cellular_component | cell wall                                    | GO:0005618 |
| gi 15610212 | cellular_component | plasma membrane                              | GO:0005886 |
| gi 15610223 | cellular_component | cell wall                                    | GO:0005618 |
| gi 15610226 | cellular_component | cell wall                                    | GO:0005618 |
| gi 15610226 | cellular_component | cytosol                                      | GO:0005829 |
| gi 15610236 | cellular_component | cell wall                                    | GO:0005618 |
| gi 15610236 | cellular_component | plasma membrane                              | GO:0005886 |
| gi 15610242 | cellular_component | cell wall                                    | GO:0005618 |
| gi 15610269 | cellular_component | extracellular space                          | GO:0005615 |
| gi 15610269 | cellular_component | cell wall                                    | GO:0005618 |
| gi 15610269 | cellular_component | cytosol                                      | GO:0005829 |
| gi 15610269 | cellular_component | plasma membrane                              | GO:0005886 |
| gi 15610269 | cellular_component | host cell endosome lumen                     | GO:0072493 |
| gi 15610275 | cellular_component | cell wall                                    | GO:0005618 |
| gi 15610275 | cellular_component | plasma membrane                              | GO:0005886 |
| gi 15610276 | cellular_component | cell wall                                    | GO:0005618 |
| gi 15610276 | cellular_component | plasma membrane                              | GO:0005886 |
| gi 15610305 | cellular_component | plasma membrane                              | GO:0005886 |
| gi 15610336 | cellular_component | cytosol                                      | GO:0005829 |
| gi 15610336 | cellular_component | integral component of plasma membrane        | GO:0005887 |
| gi 15610359 | cellular_component | cell wall                                    | GO:0005618 |
| gi 15610360 | cellular_component | cell wall                                    | GO:0005618 |
| gi 15610360 | cellular_component | cytosol                                      | GO:0005829 |
| gi 15610360 | cellular_component | plasma membrane                              | GO:0005886 |
| gi 15610363 | cellular_component | plasma membrane                              | GO:0005886 |

|             |                    |                                |            |
|-------------|--------------------|--------------------------------|------------|
| gi 15610382 | cellular_component | plasma membrane                | GO:0005886 |
| gi 15610384 | cellular_component | extracellular region           | GO:0005576 |
| gi 15610384 | cellular_component | cell wall                      | GO:0005618 |
| gi 15610384 | cellular_component | cytosol                        | GO:0005829 |
| gi 15610384 | cellular_component | plasma membrane                | GO:0005886 |
| gi 15610391 | cellular_component | cytosol                        | GO:0005829 |
| gi 15610391 | cellular_component | plasma membrane                | GO:0005886 |
| gi 15610405 | cellular_component | cell wall                      | GO:0005618 |
| gi 15610405 | cellular_component | plasma membrane                | GO:0005886 |
| gi 15610406 | cellular_component | extracellular region           | GO:0005576 |
| gi 15610406 | cellular_component | plasma membrane                | GO:0005886 |
| gi 15610410 | cellular_component | cell wall                      | GO:0005618 |
| gi 15610410 | cellular_component | cytosol                        | GO:0005829 |
| gi 15610410 | cellular_component | plasma membrane                | GO:0005886 |
| gi 15610412 | cellular_component | plasma membrane                | GO:0005886 |
| gi 15610416 | cellular_component | cell wall                      | GO:0005618 |
| gi 15610416 | cellular_component | plasma membrane                | GO:0005886 |
| gi 15610416 | cellular_component | acetyl-CoA carboxylase complex | GO:0009317 |
| gi 15610416 | cellular_component | protein complex                | GO:0043234 |
| gi 15610417 | cellular_component | cell wall                      | GO:0005618 |
| gi 15610417 | cellular_component | acetyl-CoA carboxylase complex | GO:0009317 |
| gi 15610417 | cellular_component | protein complex                | GO:0043234 |
| gi 15610419 | cellular_component | cell wall                      | GO:0005618 |
| gi 15610419 | cellular_component | cytosol                        | GO:0005829 |
| gi 15610419 | cellular_component | plasma membrane                | GO:0005886 |
| gi 15610421 | cellular_component | cell wall                      | GO:0005618 |
| gi 15610421 | cellular_component | plasma membrane                | GO:0005886 |
| gi 15610421 | cellular_component | acetyl-CoA carboxylase complex | GO:0009317 |
| gi 15610438 | cellular_component | plasma membrane                | GO:0005886 |
| gi 15610454 | cellular_component | cytosol                        | GO:0005829 |
| gi 15610454 | cellular_component | plasma membrane                | GO:0005886 |
| gi 15610472 | cellular_component | plasma membrane                | GO:0005886 |
| gi 15610475 | cellular_component | plasma membrane                | GO:0005886 |
| gi 15610492 | cellular_component | extracellular region           | GO:0005576 |
| gi 15610492 | cellular_component | plasma membrane                | GO:0005886 |
| gi 15610525 | cellular_component | cell wall                      | GO:0005618 |
| gi 15610525 | cellular_component | cytosol                        | GO:0005829 |
| gi 15610525 | cellular_component | plasma membrane                | GO:0005886 |
| gi 15610528 | cellular_component | plasma membrane                | GO:0005886 |
| gi 15610532 | cellular_component | cell wall                      | GO:0005618 |
| gi 15610537 | cellular_component | plasma membrane                | GO:0005886 |
| gi 15610546 | cellular_component | plasma membrane                | GO:0005886 |
| gi 15610553 | cellular_component | cell wall                      | GO:0005618 |
| gi 15610553 | cellular_component | plasma membrane                | GO:0005886 |
| gi 15610553 | cellular_component | bacterial nucleoid             | GO:0043590 |
| gi 15610554 | cellular_component | extracellular region           | GO:0005576 |
| gi 15610554 | cellular_component | cell wall                      | GO:0005618 |
| gi 15610554 | cellular_component | cytosol                        | GO:0005829 |
| gi 15610554 | cellular_component | plasma membrane                | GO:0005886 |
| gi 15610572 | cellular_component | plasma membrane                | GO:0005886 |
| gi 15610578 | cellular_component | plasma membrane                | GO:0005886 |
| gi 15610579 | cellular_component | cell wall                      | GO:0005618 |
| gi 15610579 | cellular_component | cytosol                        | GO:0005829 |
| gi 15610579 | cellular_component | plasma membrane                | GO:0005886 |
| gi 15610593 | cellular_component | cell wall                      | GO:0005618 |
| gi 15610593 | cellular_component | cytosol                        | GO:0005829 |
| gi 15610593 | cellular_component | plasma membrane                | GO:0005886 |
| gi 15610594 | cellular_component | cell wall                      | GO:0005618 |
| gi 15610594 | cellular_component | cytosol                        | GO:0005829 |
| gi 15610594 | cellular_component | plasma membrane                | GO:0005886 |
| gi 15610595 | cellular_component | plasma membrane                | GO:0005886 |
| gi 15610655 | cellular_component | plasma membrane                | GO:0005886 |
| gi 15610656 | cellular_component | cell wall                      | GO:0005618 |
| gi 15610656 | cellular_component | plasma membrane                | GO:0005886 |
| gi 15610705 | cellular_component | cell wall                      | GO:0005618 |
| gi 15610705 | cellular_component | plasma membrane                | GO:0005886 |
| gi 15610706 | cellular_component | plasma membrane                | GO:0005886 |
| gi 15610728 | cellular_component | cell wall                      | GO:0005618 |
| gi 15610728 | cellular_component | plasma membrane                | GO:0005886 |
| gi 15610733 | cellular_component | cell wall                      | GO:0005618 |
| gi 15610733 | cellular_component | cytosol                        | GO:0005829 |
| gi 15610733 | cellular_component | plasma membrane                | GO:0005886 |
| gi 15610736 | cellular_component | plasma membrane                | GO:0005886 |
| gi 15610764 | cellular_component | cytosol                        | GO:0005829 |
| gi 15610764 | cellular_component | plasma membrane                | GO:0005886 |

|              |                    |                                       |            |
|--------------|--------------------|---------------------------------------|------------|
| gi 15610782  | cellular_component | cell wall                             | GO:0005618 |
| gi 15610782  | cellular_component | cytosol                               | GO:0005829 |
| gi 15610782  | cellular_component | plasma membrane                       | GO:0005886 |
| gi 15610784  | cellular_component | cell wall                             | GO:0005618 |
| gi 15610803  | cellular_component | cell wall                             | GO:0005618 |
| gi 15610803  | cellular_component | plasma membrane                       | GO:0005886 |
| gi 15610805  | cellular_component | integral component of plasma membrane | GO:0005887 |
| gi 15610812  | cellular_component | cell wall                             | GO:0005618 |
| gi 15610812  | cellular_component | plasma membrane                       | GO:0005886 |
| gi 15610835  | cellular_component | cell wall                             | GO:0005618 |
| gi 15610852  | cellular_component | plasma membrane                       | GO:0005886 |
| gi 15610862  | cellular_component | plasma membrane                       | GO:0005886 |
| gi 15610870  | cellular_component | plasma membrane                       | GO:0005886 |
| gi 15610897  | cellular_component | plasma membrane                       | GO:0005886 |
| gi 15610910  | cellular_component | plasma membrane                       | GO:0005886 |
| gi 15610913  | cellular_component | plasma membrane                       | GO:0005886 |
| gi 15610926  | cellular_component | plasma membrane                       | GO:0005886 |
| gi 15610927  | cellular_component | plasma membrane                       | GO:0005886 |
| gi 15610936  | cellular_component | cell wall                             | GO:0005618 |
| gi 15610936  | cellular_component | cytosol                               | GO:0005829 |
| gi 15610936  | cellular_component | plasma membrane                       | GO:0005886 |
| gi 15610936  | cellular_component | polyketide synthase complex           | GO:0034081 |
| gi 15610937  | cellular_component | cell wall                             | GO:0005618 |
| gi 15610937  | cellular_component | plasma membrane                       | GO:0005886 |
| gi 15610945  | cellular_component | cell wall                             | GO:0005618 |
| gi 15610945  | cellular_component | plasma membrane                       | GO:0005886 |
| gi 15610950  | cellular_component | plasma membrane                       | GO:0005886 |
| gi 15610961  | cellular_component | cell wall                             | GO:0005618 |
| gi 15610961  | cellular_component | cytosol                               | GO:0005829 |
| gi 15610961  | cellular_component | plasma membrane                       | GO:0005886 |
| gi 15610982  | cellular_component | extracellular region                  | GO:0005576 |
| gi 15610982  | cellular_component | cytosol                               | GO:0005829 |
| gi 15610982  | cellular_component | plasma membrane                       | GO:0005886 |
| gi 15610985  | cellular_component | extracellular region                  | GO:0005576 |
| gi 15610985  | cellular_component | cell wall                             | GO:0005618 |
| gi 15610985  | cellular_component | cytosol                               | GO:0005829 |
| gi 15610985  | cellular_component | plasma membrane                       | GO:0005886 |
| gi 15610986  | cellular_component | plasma membrane                       | GO:0005886 |
| gi 15610988  | cellular_component | cell wall                             | GO:0005618 |
| gi 15610988  | cellular_component | integral component of plasma membrane | GO:0005887 |
| gi 15610994  | cellular_component | cytosol                               | GO:0005829 |
| gi 15610994  | cellular_component | plasma membrane                       | GO:0005886 |
| gi 15610995  | cellular_component | cytosol                               | GO:0005829 |
| gi 15610995  | cellular_component | plasma membrane                       | GO:0005886 |
| gi 15611016  | cellular_component | cell wall                             | GO:0005618 |
| gi 15611016  | cellular_component | plasma membrane                       | GO:0005886 |
| gi 15611017  | cellular_component | extracellular region                  | GO:0005576 |
| gi 15611050  | cellular_component | extracellular region                  | GO:0005576 |
| gi 15611050  | cellular_component | cell wall                             | GO:0005618 |
| gi 15611050  | cellular_component | cytosol                               | GO:0005829 |
| gi 15611050  | cellular_component | plasma membrane                       | GO:0005886 |
| gi 161352467 | cellular_component | cell wall                             | GO:0005618 |
| gi 161352467 | cellular_component | plasma membrane                       | GO:0005886 |
| gi 161352467 | cellular_component | pyruvate dehydrogenase complex        | GO:0045254 |
| gi 345462027 | cellular_component | extracellular region                  | GO:0005576 |
| gi 345462027 | cellular_component | plasma membrane                       | GO:0005886 |
| gi 448824735 | cellular_component | cell wall                             | GO:0005618 |
| gi 448824735 | cellular_component | plasma membrane                       | GO:0005886 |
| gi 448824753 | cellular_component | cell wall                             | GO:0005618 |
| gi 448824753 | cellular_component | plasma membrane                       | GO:0005886 |
| gi 448824754 | cellular_component | cytosol                               | GO:0005829 |
| gi 448824761 | cellular_component | plasma membrane                       | GO:0005886 |
| gi 448824762 | cellular_component | cell wall                             | GO:0005618 |
| gi 448824762 | cellular_component | plasma membrane                       | GO:0005886 |
| gi 448824769 | cellular_component | cell wall                             | GO:0005618 |
| gi 448824769 | cellular_component | plasma membrane                       | GO:0005886 |
| gi 448824781 | cellular_component | extracellular region                  | GO:0005576 |
| gi 448824781 | cellular_component | cell wall                             | GO:0005618 |
| gi 448824781 | cellular_component | plasma membrane                       | GO:0005886 |
| gi 448824781 | cellular_component | pyruvate dehydrogenase complex        | GO:0045254 |
| gi 448824785 | cellular_component | plasma membrane                       | GO:0005886 |
| gi 448824790 | cellular_component | cell wall                             | GO:0005618 |
| gi 448824796 | cellular_component | cytosol                               | GO:0005829 |
| gi 448824796 | cellular_component | plasma membrane                       | GO:0005886 |
| gi 448824799 | cellular_component | cytosol                               | GO:0005829 |

|              |                    |                                                              |            |
|--------------|--------------------|--------------------------------------------------------------|------------|
| gi 448824799 | cellular_component | plasma membrane                                              | GO:0005886 |
| gi 448824818 | cellular_component | cell wall                                                    | GO:0005618 |
| gi 448824818 | cellular_component | plasma membrane                                              | GO:0005886 |
| gi 57116682  | cellular_component | plasma membrane                                              | GO:0005886 |
| gi 57116704  | cellular_component | plasma membrane                                              | GO:0005886 |
| gi 57116724  | cellular_component | cell wall                                                    | GO:0005618 |
| gi 57116724  | cellular_component | plasma membrane                                              | GO:0005886 |
| gi 57116727  | cellular_component | cell wall                                                    | GO:0005618 |
| gi 57116727  | cellular_component | plasma membrane                                              | GO:0005886 |
| gi 57116734  | cellular_component | cytosol                                                      | GO:0005829 |
| gi 57116734  | cellular_component | plasma membrane                                              | GO:0005886 |
| gi 57116735  | cellular_component | plasma membrane                                              | GO:0005886 |
| gi 57116739  | cellular_component | plasma membrane                                              | GO:0005886 |
| gi 57116747  | cellular_component | plasma membrane                                              | GO:0005886 |
| gi 57116768  | cellular_component | cell wall                                                    | GO:0005618 |
| gi 57116768  | cellular_component | plasma membrane                                              | GO:0005886 |
| gi 57116779  | cellular_component | plasma membrane                                              | GO:0005886 |
| gi 57116786  | cellular_component | cell wall                                                    | GO:0005618 |
| gi 57116786  | cellular_component | cytosol                                                      | GO:0005829 |
| gi 57116786  | cellular_component | plasma membrane                                              | GO:0005886 |
| gi 57116800  | cellular_component | extracellular region                                         | GO:0005576 |
| gi 57116800  | cellular_component | plasma membrane                                              | GO:0005886 |
| gi 57116810  | cellular_component | cytosol                                                      | GO:0005829 |
| gi 57116810  | cellular_component | plasma membrane                                              | GO:0005886 |
| gi 57116820  | cellular_component | extracellular region                                         | GO:0005576 |
| gi 57116820  | cellular_component | cell wall                                                    | GO:0005618 |
| gi 57116820  | cellular_component | plasma membrane                                              | GO:0005886 |
| gi 57116832  | cellular_component | plasma membrane                                              | GO:0005886 |
| gi 57116856  | cellular_component | plasma membrane                                              | GO:0005886 |
| gi 57116903  | cellular_component | plasma membrane                                              | GO:0005886 |
| gi 57116972  | cellular_component | extracellular region                                         | GO:0005576 |
| gi 57116990  | cellular_component | cell wall                                                    | GO:0005618 |
| gi 57116990  | cellular_component | plasma membrane                                              | GO:0005886 |
| gi 57116993  | cellular_component | extracellular region                                         | GO:0005576 |
| gi 57116994  | cellular_component | plasma membrane                                              | GO:0005886 |
| gi 57117015  | cellular_component | cell wall                                                    | GO:0005618 |
| gi 57117015  | cellular_component | plasma membrane                                              | GO:0005886 |
| gi 57117016  | cellular_component | plasma membrane                                              | GO:0005886 |
| gi 57117019  | cellular_component | cell wall                                                    | GO:0005618 |
| gi 57117019  | cellular_component | plasma membrane                                              | GO:0005886 |
| gi 57117036  | cellular_component | cell wall                                                    | GO:0005618 |
| gi 57117036  | cellular_component | cytosol                                                      | GO:0005829 |
| gi 57117036  | cellular_component | plasma membrane                                              | GO:0005886 |
| gi 57117041  | cellular_component | plasma membrane                                              | GO:0005886 |
| gi 57117042  | cellular_component | cell wall                                                    | GO:0005618 |
| gi 57117042  | cellular_component | plasma membrane                                              | GO:0005886 |
| gi 57117044  | cellular_component | cell wall                                                    | GO:0005618 |
| gi 57117051  | cellular_component | ribonucleoside-diphosphate reductase complex                 | GO:0005971 |
| gi 57117081  | cellular_component | plasma membrane                                              | GO:0005886 |
| gi 57117125  | cellular_component | plasma membrane                                              | GO:0005886 |
| gi 57117128  | cellular_component | cytosol                                                      | GO:0005829 |
| gi 57117131  | cellular_component | cell wall                                                    | GO:0005618 |
| gi 57117131  | cellular_component | cytosol                                                      | GO:0005829 |
| gi 57117131  | cellular_component | plasma membrane                                              | GO:0005886 |
| gi 57117137  | cellular_component | plasma membrane                                              | GO:0005886 |
| gi 57117147  | cellular_component | extracellular region                                         | GO:0005576 |
| gi 57117168  | cellular_component | cell wall                                                    | GO:0005618 |
| gi 57117168  | cellular_component | plasma membrane                                              | GO:0005886 |
| gi 15607148  | molecular_function | magnesium ion binding                                        | GO:0000287 |
| gi 15607148  | molecular_function | DNA topoisomerase type II (ATP-hydrolyzing) activity         | GO:0003918 |
| gi 15607148  | molecular_function | protein binding                                              | GO:0005515 |
| gi 15607148  | molecular_function | ATP binding                                                  | GO:0005524 |
| gi 15607148  | molecular_function | protein heterodimerization activity                          | GO:0046982 |
| gi 15607151  | molecular_function | peptidyl-prolyl cis-trans isomerase activity                 | GO:0003755 |
| gi 15607196  | molecular_function | single-stranded DNA binding                                  | GO:0003697 |
| gi 15607208  | molecular_function | magnesium ion binding                                        | GO:0000287 |
| gi 15607208  | molecular_function | isocitrate dehydrogenase activity                            | GO:0004448 |
| gi 15607208  | molecular_function | protein homodimerization activity                            | GO:0042803 |
| gi 15607279  | molecular_function | peptide-methionine (S)-S-oxide reductase activity            | GO:0008113 |
| gi 15607279  | molecular_function | L-methionine:thioredoxin-disulfide S-oxidoreductase activity | GO:0033744 |
| gi 15607330  | molecular_function | dihydroxy-acid dehydratase activity                          | GO:0004160 |
| gi 15607330  | molecular_function | protein homodimerization activity                            | GO:0042803 |
| gi 15607364  | molecular_function | ATP binding                                                  | GO:0005524 |
| gi 15607364  | molecular_function | AMP binding                                                  | GO:0016208 |
| gi 15607364  | molecular_function | ADP binding                                                  | GO:0043531 |

|             |                    |                                                                                     |            |
|-------------|--------------------|-------------------------------------------------------------------------------------|------------|
| gi 15607364 | molecular_function | NAD binding                                                                         | GO:0051287 |
| gi 15607364 | molecular_function | NADH binding                                                                        | GO:0070404 |
| gi 15607364 | molecular_function | FAD binding                                                                         | GO:0071949 |
| gi 15607382 | molecular_function | 3-hydroxyacyl-CoA dehydratase activity                                              | GO:0018812 |
| gi 15607382 | molecular_function | 3-hydroxyacyl-[acyl-carrier-protein] dehydratase activity                           | GO:0019171 |
| gi 15607383 | molecular_function | 3-oxoacyl-[acyl-carrier-protein] reductase (NADPH) activity                         | GO:0004316 |
| gi 15607475 | molecular_function | glucose-1-phosphate thymidyltransferase activity                                    | GO:0008879 |
| gi 15607504 | molecular_function | fructose-bisphosphate aldolase activity                                             | GO:0004332 |
| gi 15607504 | molecular_function | zinc ion binding                                                                    | GO:0008270 |
| gi 15607548 | molecular_function | oxidoreductase activity, acting on CH-OH group of donors                            | GO:0016614 |
| gi 15607548 | molecular_function | coenzyme F420 binding                                                               | GO:0070967 |
| gi 15607551 | molecular_function | protein serine/threonine kinase activity                                            | GO:0004674 |
| gi 15607551 | molecular_function | protein binding                                                                     | GO:0005515 |
| gi 15607573 | molecular_function | superoxide dismutase activity                                                       | GO:0004784 |
| gi 15607573 | molecular_function | metal ion binding                                                                   | GO:0046872 |
| gi 15607581 | molecular_function | protein binding                                                                     | GO:0005515 |
| gi 15607581 | molecular_function | protein homodimerization activity                                                   | GO:0042803 |
| gi 15607586 | molecular_function | protein binding                                                                     | GO:0005515 |
| gi 15607603 | molecular_function | dihydrolipoyl dehydrogenase activity                                                | GO:0004148 |
| gi 15607603 | molecular_function | protein binding                                                                     | GO:0005515 |
| gi 15607603 | molecular_function | disulfide oxidoreductase activity                                                   | GO:0015036 |
| gi 15607603 | molecular_function | oxidoreductase activity, acting on NAD(P)H, quinone or similar compound as acceptor | GO:0016655 |
| gi 15607603 | molecular_function | protein homodimerization activity                                                   | GO:0042803 |
| gi 15607603 | molecular_function | flavin adenine dinucleotide binding                                                 | GO:0050660 |
| gi 15607603 | molecular_function | NADH binding                                                                        | GO:0070404 |
| gi 15607603 | molecular_function | oxoglutarate dehydrogenase (succinyl-transferring) activity                         | GO:0004591 |
| gi 15607609 | molecular_function | 3-hydroxybutyryl-CoA dehydrogenase activity                                         | GO:0008691 |
| gi 15607616 | molecular_function | protein binding                                                                     | GO:0005515 |
| gi 15607616 | molecular_function | heparin binding                                                                     | GO:0008201 |
| gi 15607616 | molecular_function | protein homodimerization activity                                                   | GO:0042803 |
| gi 15607641 | molecular_function | magnesium ion binding                                                               | GO:0000287 |
| gi 15607641 | molecular_function | pyrroline-5-carboxylate reductase activity                                          | GO:0004735 |
| gi 15607641 | molecular_function | manganese ion binding                                                               | GO:0030145 |
| gi 15607644 | molecular_function | cyclopropane-fatty-acyl-phospholipid synthase activity                              | GO:0008825 |
| gi 15607688 | molecular_function | 1,4-dihydroxy-2-naphthoyl-CoA synthase activity                                     | GO:0008935 |
| gi 15607739 | molecular_function | toxin-antitoxin pair type II binding                                                | GO:0097351 |
| gi 15607776 | molecular_function | protein binding                                                                     | GO:0005515 |
| gi 15607776 | molecular_function | 3-hydroxyacyl-[acyl-carrier-protein] dehydratase activity                           | GO:0019171 |
| gi 15607782 | molecular_function | protein binding                                                                     | GO:0005515 |
| gi 15607782 | molecular_function | S-adenosylmethionine-dependent methyltransferase activity                           | GO:0008757 |
| gi 15607784 | molecular_function | protein binding                                                                     | GO:0005515 |
| gi 15607825 | molecular_function | protein binding                                                                     | GO:0005515 |
| gi 15607840 | molecular_function | protein binding                                                                     | GO:0005515 |
| gi 15607873 | molecular_function | adenylate kinase activity                                                           | GO:0004017 |
| gi 15607873 | molecular_function | nucleoside diphosphate kinase activity                                              | GO:0004550 |
| gi 15607873 | molecular_function | ATP binding                                                                         | GO:0005524 |
| gi 15607900 | molecular_function | sterol binding                                                                      | GO:0032934 |
| gi 15607900 | molecular_function | protein homodimerization activity                                                   | GO:0042803 |
| gi 15607913 | molecular_function | gamma-glutamyltransferase activity                                                  | GO:0003840 |
| gi 15607998 | molecular_function | protein homodimerization activity                                                   | GO:0042803 |
| gi 15608043 | molecular_function | magnesium ion binding                                                               | GO:0000287 |
| gi 15608043 | molecular_function | calcium ion binding                                                                 | GO:0005509 |
| gi 15608050 | molecular_function | ribonuclease activity                                                               | GO:0004540 |
| gi 15608071 | molecular_function | protein kinase activity                                                             | GO:0004672 |
| gi 15608071 | molecular_function | protein serine/threonine kinase activity                                            | GO:0004674 |
| gi 15608071 | molecular_function | manganese ion binding                                                               | GO:0030145 |
| gi 15608071 | molecular_function | protein homodimerization activity                                                   | GO:0042803 |
| gi 15608086 | molecular_function | glucose-6-phosphate isomerase activity                                              | GO:0004347 |
| gi 15608112 | molecular_function | acyl-CoA dehydrogenase activity                                                     | GO:0003995 |
| gi 15608154 | molecular_function | aminoacyl-tRNA hydrolase activity                                                   | GO:0004045 |
| gi 15608157 | molecular_function | magnesium ion binding                                                               | GO:0000287 |
| gi 15608157 | molecular_function | ribose phosphate diphosphokinase activity                                           | GO:0004749 |
| gi 15608157 | molecular_function | manganese ion binding                                                               | GO:0030145 |
| gi 15608158 | molecular_function | magnesium ion binding                                                               | GO:0000287 |
| gi 15608158 | molecular_function | UDP-N-acetylglucosamine diphosphorylase activity                                    | GO:0003977 |
| gi 15608158 | molecular_function | glucosamine-1-phosphate N-acetyltransferase activity                                | GO:0019134 |
| gi 15608158 | molecular_function | uridylyltransferase activity                                                        | GO:0070569 |
| gi 15608219 | molecular_function | cystathionine gamma-synthase activity                                               | GO:0003962 |
| gi 15608219 | molecular_function | cystathionine gamma-lyase activity                                                  | GO:0004123 |
| gi 15608234 | molecular_function | protein homodimerization activity                                                   | GO:0042803 |
| gi 15608234 | molecular_function | metal ion binding                                                                   | GO:0046872 |
| gi 15608283 | molecular_function | alpha-methylacyl-CoA racemase activity                                              | GO:0008111 |
| gi 15608283 | molecular_function | protein homodimerization activity                                                   | GO:0042803 |
| gi 15608295 | molecular_function | FMN binding                                                                         | GO:0010181 |
| gi 15608295 | molecular_function | pyridoxal phosphate binding                                                         | GO:0030170 |

|             |                    |                                                                                          |            |
|-------------|--------------------|------------------------------------------------------------------------------------------|------------|
| gi 15608295 | molecular_function | protein homodimerization activity                                                        | GO:0042803 |
| gi 15608341 | molecular_function | magnesium ion binding                                                                    | GO:0000287 |
| gi 15608341 | molecular_function | 2,3,4,5-tetrahydropyridine-2,6-dicarboxylate N-succinyltransferase activity              | GO:0008666 |
| gi 15608341 | molecular_function | sodium ion binding                                                                       | GO:0031402 |
| gi 15608341 | molecular_function | coenzyme binding                                                                         | GO:0050662 |
| gi 15608379 | molecular_function | magnesium ion binding                                                                    | GO:0000287 |
| gi 15608379 | molecular_function | cobalt ion binding                                                                       | GO:0050897 |
| gi 15608380 | molecular_function | L-malate dehydrogenase activity                                                          | GO:0030060 |
| gi 15608386 | molecular_function | endonuclease activity                                                                    | GO:0004519 |
| gi 15608399 | molecular_function | uracil DNA N-glycosylase activity                                                        | GO:0004844 |
| gi 15608399 | molecular_function | DNA-deoxyinosine glycosylase activity                                                    | GO:0033958 |
| gi 15608399 | molecular_function | iron-sulfur cluster binding                                                              | GO:0051536 |
| gi 15608424 | molecular_function | carbonate dehydratase activity                                                           | GO:0004089 |
| gi 15608424 | molecular_function | zinc ion binding                                                                         | GO:0008270 |
| gi 15608424 | molecular_function | protein homodimerization activity                                                        | GO:0042803 |
| gi 15608435 | molecular_function | threonine synthase activity                                                              | GO:0004795 |
| gi 15608435 | molecular_function | pyridoxal phosphate binding                                                              | GO:0030170 |
| gi 15608435 | molecular_function | protein homodimerization activity                                                        | GO:0042803 |
| gi 15608474 | molecular_function | metalloexopeptidase activity                                                             | GO:0008235 |
| gi 15608474 | molecular_function | zinc ion binding                                                                         | GO:0008270 |
| gi 15608486 | molecular_function | enoyl-[acyl-carrier-protein] reductase activity                                          | GO:0016631 |
| gi 15608530 | molecular_function | phosphopantothenoylcysteine decarboxylase activity                                       | GO:0004633 |
| gi 15608576 | molecular_function | triose-phosphate isomerase activity                                                      | GO:0004807 |
| gi 15608576 | molecular_function | protein homodimerization activity                                                        | GO:0042803 |
| gi 15608613 | molecular_function | aconitate hydratase activity                                                             | GO:0003994 |
| gi 15608613 | molecular_function | iron-responsive element binding                                                          | GO:0030350 |
| gi 15608621 | molecular_function | 3-oxoacyl-[acyl-carrier-protein] reductase (NADPH) activity                              | GO:0004316 |
| gi 15608621 | molecular_function | acetoacetyl-CoA reductase activity                                                       | GO:0018454 |
| gi 15608621 | molecular_function | protein homodimerization activity                                                        | GO:0042803 |
| gi 15608622 | molecular_function | enoyl-[acyl-carrier-protein] reductase (NADH) activity                                   | GO:0004318 |
| gi 15608622 | molecular_function | fatty acid binding                                                                       | GO:0005504 |
| gi 15608622 | molecular_function | NAD+ binding                                                                             | GO:0070403 |
| gi 15608674 | molecular_function | isoleucine-tRNA ligase activity                                                          | GO:0004822 |
| gi 15608734 | molecular_function | nicotinate-nucleotide diphosphorylase (carboxylating) activity                           | GO:0004514 |
| gi 15608749 | molecular_function | magnesium ion binding                                                                    | GO:0000287 |
| gi 15608749 | molecular_function | indole-3-glycerol-phosphate synthase activity                                            | GO:0004425 |
| gi 15608769 | molecular_function | CTP binding                                                                              | GO:0002135 |
| gi 15608769 | molecular_function | dephospho-CoA kinase activity                                                            | GO:0004140 |
| gi 15608769 | molecular_function | dATP binding                                                                             | GO:0032564 |
| gi 15608776 | molecular_function | protein binding                                                                          | GO:0005515 |
| gi 15608794 | molecular_function | ornithine carbamoyltransferase activity                                                  | GO:0004585 |
| gi 15608833 | molecular_function | NAD+ kinase activity                                                                     | GO:0003951 |
| gi 15608958 | molecular_function | ATPase activity                                                                          | GO:0016887 |
| gi 15608964 | molecular_function | protein binding                                                                          | GO:0005515 |
| gi 15608974 | molecular_function | magnesium ion binding                                                                    | GO:0000287 |
| gi 15608974 | molecular_function | malate synthase activity                                                                 | GO:0004474 |
| gi 15608974 | molecular_function | protein binding                                                                          | GO:0005515 |
| gi 15608974 | molecular_function | manganese ion binding                                                                    | GO:0030145 |
| gi 15608974 | molecular_function | protein homodimerization activity                                                        | GO:0042803 |
| gi 15608980 | molecular_function | IMP dehydrogenase activity                                                               | GO:0003938 |
| gi 15609045 | molecular_function | catalase activity                                                                        | GO:0004096 |
| gi 15609045 | molecular_function | peroxidase activity                                                                      | GO:0004601 |
| gi 15609045 | molecular_function | oxidoreductase activity, acting on a heme group of donors, nitrogenous group as acceptor | GO:0016677 |
| gi 15609045 | molecular_function | heme binding                                                                             | GO:0020037 |
| gi 15609045 | molecular_function | protein homodimerization activity                                                        | GO:0042803 |
| gi 15609045 | molecular_function | NADPH binding                                                                            | GO:0070402 |
| gi 15609045 | molecular_function | NADH binding                                                                             | GO:0070404 |
| gi 15609069 | molecular_function | peroxidase activity                                                                      | GO:0004601 |
| gi 15609069 | molecular_function | protein disulfide isomerase activity                                                     | GO:0006467 |
| gi 15609069 | molecular_function | disulfide oxidoreductase activity                                                        | GO:0015036 |
| gi 15609069 | molecular_function | protein homodimerization activity                                                        | GO:0042803 |
| gi 15609069 | molecular_function | peroxiredoxin activity                                                                   | GO:0051920 |
| gi 15609139 | molecular_function | androstan-3-alpha,17-beta-diol dehydrogenase activity                                    | GO:0047044 |
| gi 15609168 | molecular_function | protein binding involved in protein folding                                              | GO:0044183 |
| gi 15609204 | molecular_function | beta-lactamase activity                                                                  | GO:0008800 |
| gi 15609220 | molecular_function | nickel cation binding                                                                    | GO:0016151 |
| gi 15609234 | molecular_function | acid-amino acid ligase activity                                                          | GO:0016881 |
| gi 15609246 | molecular_function | protein binding                                                                          | GO:0005515 |
| gi 15609249 | molecular_function | hydrolase activity, acting on carbon-nitrogen (but not peptide) bonds, in linear amides  | GO:0016811 |
| gi 15609258 | molecular_function | ATP binding                                                                              | GO:0005524 |
| gi 15609258 | molecular_function | AMP binding                                                                              | GO:0016208 |
| gi 15609258 | molecular_function | protein homodimerization activity                                                        | GO:0042803 |
| gi 15609258 | molecular_function | magnesium ion binding                                                                    | GO:0000287 |
| gi 15609277 | molecular_function | toxin-antitoxin pair type II binding                                                     | GO:0097351 |
| gi 15609296 | molecular_function | protein binding                                                                          | GO:0005515 |

|             |                    |                                                                                            |            |
|-------------|--------------------|--------------------------------------------------------------------------------------------|------------|
| gi 15609315 | molecular_function | manganese ion binding                                                                      | GO:0030145 |
| gi 15609315 | molecular_function | alpha-1,2-mannosyltransferase activity                                                     | GO:0000026 |
| gi 15609322 | molecular_function | long-chain fatty acid-CoA ligase activity                                                  | GO:0004467 |
| gi 15609324 | molecular_function | mannosyltransferase activity                                                               | GO:0000030 |
| gi 15609339 | molecular_function | GTP binding                                                                                | GO:0005525 |
| gi 15609339 | molecular_function | dGTP binding                                                                               | GO:0032567 |
| gi 15609339 | molecular_function | protein homodimerization activity                                                          | GO:0042803 |
| gi 15609347 | molecular_function | protein homodimerization activity                                                          | GO:0042803 |
| gi 15609347 | molecular_function | adenylate cyclase activity                                                                 | GO:0004016 |
| gi 15609348 | molecular_function | fatty acid binding                                                                         | GO:0005504 |
| gi 15609352 | molecular_function | lipoic acid binding                                                                        | GO:0031405 |
| gi 15609352 | molecular_function | oxoglutarate dehydrogenase (succinyl-transferring) activity                                | GO:0004591 |
| gi 15609357 | molecular_function | magnesium ion binding                                                                      | GO:0000287 |
| gi 15609357 | molecular_function | glutamate-ammonia ligase activity                                                          | GO:0004356 |
| gi 15609357 | molecular_function | ATP binding                                                                                | GO:0005524 |
| gi 15609357 | molecular_function | GTP binding                                                                                | GO:0005525 |
| gi 15609357 | molecular_function | GDP binding                                                                                | GO:0019003 |
| gi 15609357 | molecular_function | manganese ion binding                                                                      | GO:0030145 |
| gi 15609357 | molecular_function | ADP binding                                                                                | GO:0043531 |
| gi 15609357 | molecular_function | cobalt ion binding                                                                         | GO:0050897 |
| gi 15609359 | molecular_function | D-glutaminase activity                                                                     | GO:0050001 |
| gi 15609381 | molecular_function | acyl binding                                                                               | GO:0000035 |
| gi 15609381 | molecular_function | ACP phosphopantetheine attachment site binding involved in fatty acid biosynthetic process | GO:0000036 |
| gi 15609381 | molecular_function | protein binding                                                                            | GO:0005515 |
| gi 15609382 | molecular_function | 3-oxoacyl-[acyl-carrier-protein] synthase activity                                         | GO:0004315 |
| gi 15609382 | molecular_function | protein binding                                                                            | GO:0005515 |
| gi 15609422 | molecular_function | diacylglycerol O-acyltransferase activity                                                  | GO:0004144 |
| gi 15609521 | molecular_function | (2,3-dihydroxybenzoyl)adenylate synthase activity                                          | GO:0008668 |
| gi 15609521 | molecular_function | acid-amino acid ligase activity                                                            | GO:0016881 |
| gi 15609528 | molecular_function | sulfite reductase activity                                                                 | GO:0016002 |
| gi 15609528 | molecular_function | 4 iron, 4 sulfur cluster binding                                                           | GO:0051539 |
| gi 15609565 | molecular_function | peroxidase activity                                                                        | GO:0004601 |
| gi 15609565 | molecular_function | protein binding                                                                            | GO:0005515 |
| gi 15609565 | molecular_function | alkyl hydroperoxide reductase activity                                                     | GO:0008785 |
| gi 15609565 | molecular_function | oxidoreductase activity                                                                    | GO:0016491 |
| gi 15609565 | molecular_function | hydroperoxide reductase activity                                                           | GO:0032843 |
| gi 15609565 | molecular_function | peroxiredoxin activity                                                                     | GO:0051920 |
| gi 15609566 | molecular_function | protein binding                                                                            | GO:0005515 |
| gi 15609566 | molecular_function | disulfide oxidoreductase activity                                                          | GO:0015036 |
| gi 15609566 | molecular_function | hydroperoxide reductase activity                                                           | GO:0032843 |
| gi 15609566 | molecular_function | protein homodimerization activity                                                          | GO:0042803 |
| gi 15609591 | molecular_function | magnesium ion binding                                                                      | GO:0000287 |
| gi 15609591 | molecular_function | 2-oxoglutarate synthase activity                                                           | GO:0047553 |
| gi 15609613 | molecular_function | protein binding                                                                            | GO:0005515 |
| gi 15609632 | molecular_function | pyruvate dehydrogenase (acetyl-transferring) activity                                      | GO:0004739 |
| gi 15609635 | molecular_function | magnesium ion binding                                                                      | GO:0000287 |
| gi 15609639 | molecular_function | carboxyl- or carbamoyltransferase activity                                                 | GO:0016743 |
| gi 15609670 | molecular_function | protein binding                                                                            | GO:0005515 |
| gi 15609670 | molecular_function | protein homodimerization activity                                                          | GO:0042803 |
| gi 15609674 | molecular_function | 3-dehydroquinate dehydratase activity                                                      | GO:0003855 |
| gi 15609675 | molecular_function | 3-dehydroquinate synthase activity                                                         | GO:0003856 |
| gi 15609675 | molecular_function | copper ion binding                                                                         | GO:0005507 |
| gi 15609675 | molecular_function | zinc ion binding                                                                           | GO:0008270 |
| gi 15609677 | molecular_function | chorismate synthase activity                                                               | GO:0004107 |
| gi 15609677 | molecular_function | FMN binding                                                                                | GO:0010181 |
| gi 15609677 | molecular_function | oxidoreductase activity, acting on NAD(P)H                                                 | GO:0016651 |
| gi 15609677 | molecular_function | NAD binding                                                                                | GO:0051287 |
| gi 15609743 | molecular_function | amine-lyase activity                                                                       | GO:0016843 |
| gi 15609760 | molecular_function | ATP binding                                                                                | GO:0005524 |
| gi 15609834 | molecular_function | magnesium ion binding                                                                      | GO:0000287 |
| gi 15609834 | molecular_function | dUTP diphosphatase activity                                                                | GO:0004170 |
| gi 15609840 | molecular_function | DNA binding                                                                                | GO:0003677 |
| gi 15609840 | molecular_function | protein binding                                                                            | GO:0005515 |
| gi 15609840 | molecular_function | sigma factor activity                                                                      | GO:0016987 |
| gi 15609848 | molecular_function | DNA binding                                                                                | GO:0003677 |
| gi 15609848 | molecular_function | iron ion binding                                                                           | GO:0005506 |
| gi 15609848 | molecular_function | ferrous iron binding                                                                       | GO:0008198 |
| gi 15609848 | molecular_function | zinc ion binding                                                                           | GO:0008270 |
| gi 15609848 | molecular_function | nickel cation binding                                                                      | GO:0016151 |
| gi 15609848 | molecular_function | manganese ion binding                                                                      | GO:0030145 |
| gi 15609848 | molecular_function | protein homodimerization activity                                                          | GO:0042803 |
| gi 15609848 | molecular_function | cadmium ion binding                                                                        | GO:0046870 |
| gi 15609848 | molecular_function | cobalt ion binding                                                                         | GO:0050897 |
| gi 15609863 | molecular_function | diaminopimelate epimerase activity                                                         | GO:0008837 |
| gi 15609890 | molecular_function | 4-hydroxy-tetrahydrodipicolinate synthase                                                  | GO:0008840 |



|             |                    |                                                                                                                                                                                             |            |
|-------------|--------------------|---------------------------------------------------------------------------------------------------------------------------------------------------------------------------------------------|------------|
| gi 15609910 | molecular_function | 4-hydroxy-tetrahydrodipicolinate reductase                                                                                                                                                  | GO:0008839 |
| gi 15609910 | molecular_function | NADPH binding                                                                                                                                                                               | GO:0070402 |
| gi 15609910 | molecular_function | NADH binding                                                                                                                                                                                | GO:0070404 |
| gi 15609917 | molecular_function | alanine dehydrogenase activity                                                                                                                                                              | GO:0000286 |
| gi 15610019 | molecular_function | translation termination factor activity                                                                                                                                                     | GO:0008079 |
| gi 15610056 | molecular_function | ATP binding                                                                                                                                                                                 | GO:0005524 |
| gi 15610056 | molecular_function | ADP binding                                                                                                                                                                                 | GO:0043531 |
| gi 15610072 | molecular_function | 3-oxoacyl-[acyl-carrier-protein] synthase activity                                                                                                                                          | GO:0004315 |
| gi 15610077 | molecular_function | protein binding                                                                                                                                                                             | GO:0005515 |
| gi 15610077 | molecular_function | transferase activity, transferring acyl groups other than amino-acyl groups                                                                                                                 | GO:0016747 |
| gi 15610102 | molecular_function | pantetheine-phosphate adenylyltransferase activity                                                                                                                                          | GO:0004595 |
| gi 15610121 | molecular_function | magnesium ion binding                                                                                                                                                                       | GO:0000287 |
| gi 15610121 | molecular_function | polyphosphate kinase activity                                                                                                                                                               | GO:0008976 |
| gi 15610121 | molecular_function | protein homodimerization activity                                                                                                                                                           | GO:0042803 |
| gi 15610123 | molecular_function | damaged DNA binding                                                                                                                                                                         | GO:0003684 |
| gi 15610123 | molecular_function | double-stranded DNA binding                                                                                                                                                                 | GO:0003690 |
| gi 15610123 | molecular_function | protein binding                                                                                                                                                                             | GO:0005515 |
| gi 15610123 | molecular_function | supercoiled DNA binding                                                                                                                                                                     | GO:0097100 |
| gi 15610132 | molecular_function | 3-isopropylmalate dehydrogenase activity                                                                                                                                                    | GO:0003862 |
| gi 15610132 | molecular_function | protein homodimerization activity                                                                                                                                                           | GO:0042803 |
| gi 15610188 | molecular_function | ribonucleoside-diphosphate reductase activity, thioredoxin disulfide as acceptor                                                                                                            | GO:0004748 |
| gi 15610188 | molecular_function | protein binding                                                                                                                                                                             | GO:0005515 |
| gi 15610188 | molecular_function | ATP binding                                                                                                                                                                                 | GO:0005524 |
| gi 15610188 | molecular_function | CDP reductase activity                                                                                                                                                                      | GO:0051063 |
| gi 15610225 | molecular_function | diacylglycerol O-acyltransferase activity                                                                                                                                                   | GO:0004144 |
| gi 15610226 | molecular_function | fatty-acyl-CoA synthase activity                                                                                                                                                            | GO:0004321 |
| gi 15610226 | molecular_function | protein homodimerization activity                                                                                                                                                           | GO:0042803 |
| gi 15610269 | molecular_function | DNA binding                                                                                                                                                                                 | GO:0003677 |
| gi 15610269 | molecular_function | sequence-specific DNA binding transcription factor activity                                                                                                                                 | GO:0003700 |
| gi 15610359 | molecular_function | protein binding                                                                                                                                                                             | GO:0005515 |
| gi 15610363 | molecular_function | 3-phosphoshikimate 1-carboxyvinyltransferase activity                                                                                                                                       | GO:0003866 |
| gi 15610384 | molecular_function | adenosylhomocysteinase activity                                                                                                                                                             | GO:0004013 |
| gi 15610384 | molecular_function | NAD+ binding                                                                                                                                                                                | GO:0070403 |
| gi 15610416 | molecular_function | acetyl-CoA carboxylase activity                                                                                                                                                             | GO:0003989 |
| gi 15610416 | molecular_function | propionyl-CoA carboxylase activity                                                                                                                                                          | GO:0004658 |
| gi 15610416 | molecular_function | protein binding                                                                                                                                                                             | GO:0005515 |
| gi 15610417 | molecular_function | acetyl-CoA carboxylase activity                                                                                                                                                             | GO:0003989 |
| gi 15610417 | molecular_function | propionyl-CoA carboxylase activity                                                                                                                                                          | GO:0004658 |
| gi 15610417 | molecular_function | protein binding                                                                                                                                                                             | GO:0005515 |
| gi 15610421 | molecular_function | acetyl-CoA carboxylase activity                                                                                                                                                             | GO:0003989 |
| gi 15610421 | molecular_function | propionyl-CoA carboxylase activity                                                                                                                                                          | GO:0004658 |
| gi 15610421 | molecular_function | protein binding                                                                                                                                                                             | GO:0005515 |
| gi 15610475 | molecular_function | magnesium ion binding                                                                                                                                                                       | GO:0000287 |
| gi 15610475 | molecular_function | isocitrate dehydrogenase (NADP+) activity                                                                                                                                                   | GO:0004450 |
| gi 15610475 | molecular_function | zinc ion binding                                                                                                                                                                            | GO:0008270 |
| gi 15610475 | molecular_function | protein homodimerization activity                                                                                                                                                           | GO:0042803 |
| gi 15610525 | molecular_function | long-chain-enoyl-CoA hydratase activity                                                                                                                                                     | GO:0016508 |
| gi 15610525 | molecular_function | 3-hydroxyacyl-[acyl-carrier-protein] dehydratase activity                                                                                                                                   | GO:0019171 |
| gi 15610528 | molecular_function | cyclopropane-fatty-acyl-phospholipid synthase activity                                                                                                                                      | GO:0008825 |
| gi 15610546 | molecular_function | IMP dehydrogenase activity                                                                                                                                                                  | GO:0003938 |
| gi 15610553 | molecular_function | single-stranded DNA binding                                                                                                                                                                 | GO:0003697 |
| gi 15610554 | molecular_function | metal ion binding                                                                                                                                                                           | GO:0046872 |
| gi 15610704 | molecular_function | iron ion binding                                                                                                                                                                            | GO:0005506 |
| gi 15610704 | molecular_function | 3,4-dihydroxy-9,10-secoandrosta-1,3,5(10)-triene-9,17-dione 4,5-dioxygenase activity                                                                                                        | GO:0047071 |
| gi 15610705 | molecular_function | 4,9-DSHA hydrolase activity                                                                                                                                                                 | GO:0034820 |
| gi 15610705 | molecular_function | protein homodimerization activity                                                                                                                                                           | GO:0042803 |
| gi 15610706 | molecular_function | oxidoreductase activity, acting on paired donors, with incorporation or reduction of molecular oxygen, reduced flavin or flavoprotein as one donor, and incorporation of one atom of oxygen | GO:0016712 |
| gi 15610717 | molecular_function | 2-C-methyl-D-erythritol 2,4-cyclodiphosphate synthase activity                                                                                                                              | GO:0008685 |
| gi 15610728 | molecular_function | heme binding                                                                                                                                                                                | GO:0020037 |
| gi 15610733 | molecular_function | DNA binding                                                                                                                                                                                 | GO:0003677 |
| gi 15610736 | molecular_function | pantothenate kinase activity                                                                                                                                                                | GO:0004594 |
| gi 15610764 | molecular_function | magnesium ion binding                                                                                                                                                                       | GO:0000287 |
| gi 15610764 | molecular_function | inorganic diphosphatase activity                                                                                                                                                            | GO:0004427 |
| gi 15610782 | molecular_function | magnesium ion binding                                                                                                                                                                       | GO:0000287 |
| gi 15610782 | molecular_function | DNA topoisomerase type I activity                                                                                                                                                           | GO:0003917 |
| gi 15610812 | molecular_function | DNA binding                                                                                                                                                                                 | GO:0003677 |
| gi 15610812 | molecular_function | sequence-specific DNA binding transcription factor activity                                                                                                                                 | GO:0003700 |
| gi 15610812 | molecular_function | cAMP binding                                                                                                                                                                                | GO:0030552 |
| gi 15610812 | molecular_function | protein homodimerization activity                                                                                                                                                           | GO:0042803 |
| gi 15610814 | molecular_function | DNA binding                                                                                                                                                                                 | GO:0003677 |
| gi 15610870 | molecular_function | diacylglycerol O-acyltransferase activity                                                                                                                                                   | GO:0004144 |
| gi 15610936 | molecular_function | protein binding                                                                                                                                                                             | GO:0005515 |
| gi 15610936 | molecular_function | transferase activity, transferring acyl groups other than amino-acyl groups                                                                                                                 | GO:0016747 |
| gi 15610937 | molecular_function | adenylyltransferase activity                                                                                                                                                                | GO:0070566 |

|              |                    |                                                             |            |
|--------------|--------------------|-------------------------------------------------------------|------------|
| gi 15610945  | molecular_function | UDP-galactopyranose mutase activity                         | GO:0008767 |
| gi 15610974  | molecular_function | prephenate dehydratase activity                             | GO:0004664 |
| gi 15610974  | molecular_function | amino acid binding                                          | GO:0016597 |
| gi 15610974  | molecular_function | protein homodimerization activity                           | GO:0042803 |
| gi 15610974  | molecular_function | chorismate mutase activity                                  | GO:0004106 |
| gi 15610982  | molecular_function | superoxide dismutase activity                               | GO:0004784 |
| gi 15610982  | molecular_function | iron ion binding                                            | GO:0005506 |
| gi 15610982  | molecular_function | protein homodimerization activity                           | GO:0042803 |
| gi 15610985  | molecular_function | DNA binding                                                 | GO:0003677 |
| gi 15610988  | molecular_function | DNA binding                                                 | GO:0003677 |
| gi 15610988  | molecular_function | protein homodimerization activity                           | GO:0042803 |
| gi 15610995  | molecular_function | protein binding                                             | GO:0005515 |
| gi 15611017  | molecular_function | protein binding                                             | GO:0005515 |
| gi 15611050  | molecular_function | protein disulfide isomerase activity                        | GO:0006467 |
| gi 15611050  | molecular_function | electron carrier activity                                   | GO:0009055 |
| gi 15611050  | molecular_function | protein disulfide oxidoreductase activity                   | GO:0015035 |
| gi 15611050  | molecular_function | disulfide oxidoreductase activity                           | GO:0015036 |
| gi 15611050  | molecular_function | glutathione disulfide oxidoreductase activity               | GO:0015038 |
| gi 15611050  | molecular_function | S-nitrosoglutathione reductase activity                     | GO:0080007 |
| gi 161352467 | molecular_function | magnesium ion binding                                       | GO:0000287 |
| gi 161352467 | molecular_function | protein binding                                             | GO:0005515 |
| gi 161352467 | molecular_function | 2-oxoglutarate decarboxylase activity                       | GO:0008683 |
| gi 161352467 | molecular_function | electron carrier activity                                   | GO:0009055 |
| gi 161352467 | molecular_function | 2-hydroxy-3-oxoadipate synthase activity                    | GO:0050439 |
| gi 161352467 | molecular_function | oxoglutarate dehydrogenase (succinyl-transferring) activity | GO:0004591 |
| gi 345462027 | molecular_function | magnesium ion binding                                       | GO:0000287 |
| gi 345462027 | molecular_function | 2-isopropylmalate synthase activity                         | GO:0003852 |
| gi 345462027 | molecular_function | zinc ion binding                                            | GO:0008270 |
| gi 345462027 | molecular_function | manganese ion binding                                       | GO:0030145 |
| gi 345462027 | molecular_function | potassium ion binding                                       | GO:0030955 |
| gi 345462027 | molecular_function | protein homodimerization activity                           | GO:0042803 |
| gi 448824735 | molecular_function | magnesium ion binding                                       | GO:0000287 |
| gi 448824735 | molecular_function | DNA topoisomerase type II (ATP-hydrolyzing) activity        | GO:0003918 |
| gi 448824735 | molecular_function | ATP binding                                                 | GO:0005524 |
| gi 448824735 | molecular_function | protein heterodimerization activity                         | GO:0046982 |
| gi 448824753 | molecular_function | glycine hydroxymethyltransferase activity                   | GO:0004372 |
| gi 448824753 | molecular_function | pyridoxal phosphate binding                                 | GO:0030170 |
| gi 448824753 | molecular_function | protein homodimerization activity                           | GO:0042803 |
| gi 448824754 | molecular_function | fructose 1,6-bisphosphate 1-phosphatase activity            | GO:0042132 |
| gi 448824781 | molecular_function | magnesium ion binding                                       | GO:0000287 |
| gi 448824781 | molecular_function | pyruvate dehydrogenase (acetyl-transferring) activity       | GO:0004739 |
| gi 448824785 | molecular_function | trehalase activity                                          | GO:0015927 |
| gi 448824785 | molecular_function | magnesium ion binding                                       | GO:0000287 |
| gi 57116704  | molecular_function | succinate-semialdehyde dehydrogenase [NAD(P)+] activity     | GO:0009013 |
| gi 57116734  | molecular_function | isocitrate lyase activity                                   | GO:0004451 |
| gi 57116734  | molecular_function | methylisocitrate lyase activity                             | GO:0046421 |
| gi 57116903  | molecular_function | succinate-semialdehyde dehydrogenase [NAD(P)+] activity     | GO:0009013 |
| gi 57116956  | molecular_function | pyridoxal phosphate binding                                 | GO:0030170 |
| gi 57116972  | molecular_function | cysteine synthase activity                                  | GO:0004124 |
| gi 57116972  | molecular_function | protein binding                                             | GO:0005515 |
| gi 57116972  | molecular_function | pyridoxal phosphate binding                                 | GO:0030170 |
| gi 57116972  | molecular_function | protein homodimerization activity                           | GO:0042803 |
| gi 57116987  | molecular_function | aminoglycoside N-acetyltransferase activity                 | GO:0034069 |
| gi 57116990  | molecular_function | NAD+ synthase (glutamine-hydrolyzing) activity              | GO:0003952 |
| gi 57116993  | molecular_function | ribose-5-phosphate isomerase activity                       | GO:0004751 |
| gi 57116993  | molecular_function | protein homodimerization activity                           | GO:0042803 |
| gi 57117031  | molecular_function | iron ion binding                                            | GO:0005506 |
| gi 57117031  | molecular_function | nickel cation binding                                       | GO:0016151 |
| gi 57117031  | molecular_function | manganese ion binding                                       | GO:0030145 |
| gi 57117031  | molecular_function | cobalt ion binding                                          | GO:0050897 |
| gi 57117031  | molecular_function | metalloaminopeptidase activity                              | GO:0070006 |
| gi 57117042  | molecular_function | phosphoglycerate dehydrogenase activity                     | GO:0004617 |
| gi 57117044  | molecular_function | magnesium ion binding                                       | GO:0000287 |
| gi 57117044  | molecular_function | acetolactate synthase activity                              | GO:0003984 |
| gi 57117044  | molecular_function | thiamine pyrophosphate binding                              | GO:0030976 |
| gi 57117051  | molecular_function | protein binding                                             | GO:0005515 |
| gi 57117081  | molecular_function | mannose-1-phosphate guanylyltransferase (GDP) activity      | GO:0008928 |
| gi 57117125  | molecular_function | arylamine N-acetyltransferase activity                      | GO:0004060 |
| gi 57117131  | molecular_function | protein binding                                             | GO:0005515 |
| gi 57117131  | molecular_function | ATPase activity                                             | GO:0016887 |
| gi 57117131  | molecular_function | protein homodimerization activity                           | GO:0042803 |
| gi 57117131  | molecular_function | protein binding involved in protein folding                 | GO:0044183 |
