# Supplementary material
Source: PubMed Central journal article supplement (PMC4390261)
Supplement: supp_M114.045922_mcp.M114.045922-5.pdf [file supp_M114.045922_mcp.M114.045922-5.pdf]

**Table S4A. Complete list of GO terms enriched in the *M. tuberculosis* H37Rv succinylome.**

| GO-ID | Description                                          | Term              | p-value  | corr p-value | x   | n    | X   | N    | Genes in test set                                                                                                                                                                                                                                                                                                                                                                                                                                                                                                                                                                                                                                                                                                                                                                                                                                                                                                                                                                                                                                                                                                                                                                                                                                                                                                                                                                                                                                                                                                                                                                                                                                                                                                                                                                                                                                                                                                                                                                                                                                                                                                                                                                                                                                                                                                                                                                                                                                                                                                                                                                                                                                                                                                                                                                                                                                                                                                                                                                                                                                                                                                                                                                                                                                                                                                                                                                                                                                                                                                                                                                                                                            |
|-------|------------------------------------------------------|-------------------|----------|--------------|-----|------|-----|------|----------------------------------------------------------------------------------------------------------------------------------------------------------------------------------------------------------------------------------------------------------------------------------------------------------------------------------------------------------------------------------------------------------------------------------------------------------------------------------------------------------------------------------------------------------------------------------------------------------------------------------------------------------------------------------------------------------------------------------------------------------------------------------------------------------------------------------------------------------------------------------------------------------------------------------------------------------------------------------------------------------------------------------------------------------------------------------------------------------------------------------------------------------------------------------------------------------------------------------------------------------------------------------------------------------------------------------------------------------------------------------------------------------------------------------------------------------------------------------------------------------------------------------------------------------------------------------------------------------------------------------------------------------------------------------------------------------------------------------------------------------------------------------------------------------------------------------------------------------------------------------------------------------------------------------------------------------------------------------------------------------------------------------------------------------------------------------------------------------------------------------------------------------------------------------------------------------------------------------------------------------------------------------------------------------------------------------------------------------------------------------------------------------------------------------------------------------------------------------------------------------------------------------------------------------------------------------------------------------------------------------------------------------------------------------------------------------------------------------------------------------------------------------------------------------------------------------------------------------------------------------------------------------------------------------------------------------------------------------------------------------------------------------------------------------------------------------------------------------------------------------------------------------------------------------------------------------------------------------------------------------------------------------------------------------------------------------------------------------------------------------------------------------------------------------------------------------------------------------------------------------------------------------------------------------------------------------------------------------------------------------------------|
| 40007 | growth                                               | BiologicalProcess | 9.86E-15 | 1.32E-12     | 224 | 705  | 531 | 2477 | 15611000, 15610139, 448824799, 448824796, 448824797, 15610805, 15610678, 15610041, 15608523, 15610532, 15608520, 15607541, 15610936, 15607492, 15608527, 15610146, 15607491, 15610937, 15607938, 345462027, 15607498, 57116724, 15609282, 15608530, 15608531, 15607551, 57117131, 15607847, 15607651, 15607846, 15610019, 15607384, 15607845, 161352467, 15609494, 57117128, 15607951, 15607854, 15609298, 15607855, 15610553, 15610554, 15610572, 15610166, 15607563, 15607564, 15607856, 57116747, 15607859, 15610027, 15607858, 15608613, 15610026, 15607862, 15609890, 15609751, 448824757, 15608767, 15608768, 15610705, 15608234, 15608372, 15610706, 15608238, 15607776, 15607269, 15609614, 57116768, 57116767, 15607641, 15610106, 15610104, 15608779, 448824761, 15609760, 15609381, 15609382, 15609246, 15608769, 15607780, 15607488, 15610411, 15610926, 15608741, 15610927, 15610417, 15609258, 15608739, 15609352, 15607506, 15610121, 15607792, 15607791, 15607603, 15609357, 15607330, 15607421, 15607475, 15607912, 57116786, 15607912, 57116786, 15610123, 15607525, 15608755, 15610719, 15609229, 15610717, 15608749, 15610132, 15608341, 15610812, 15610745, 57117044, 57117042, 15609848, 57117041, 15610226, 15609661, 15610225, 15610224, 15610223, 15608086, 15608154, 57117051, 15608837, 15610733, 15609923, 15610734, 15608157, 15609315, 15608158, 15608091, 15608092, 15609510, 15608097, 15609863, 15608165, 15608163, 15608969, 15608586, 15608262, 15608587, 15609347, 15609549, 15609834, 15608788, 15608833, 15609648, 15609332, 15608273, 15609337, 15608958, 15610242, 15609528, 15608490, 15609840, 448824735, 15608794, 15608821, 15608793, 15608792, 15609743, 15609637, 15610275, 57116990, 15609168, 15607840, 15610784, 57117137, 57117081, 15610782, 15607844, 15608424, 15607842, 15607841, 57117147, 15610472, 57116987, 15608043, 15608576, 15608575, 15608574, 15608432, 15610595, 15608437, 15608435, 15607823, 15607825, 15607581, 15609692, 15610188, 15608447, 15608446, 15608449, 15610064, 15608448, 15609976, 15610391, 15609585, 57117168, 15608876, 15610593, 15610594, 15609581, 15610056, 15608024, 15610492, 15608451, 15608450, 15610384, 15610579, 15610382, 15609982, 15608455, 15609675, 15610995, 15609674, 15609677, 15607807, 15607808, 15610994, 15609579, 15610276, 15609671, 15609670                                                                                                                                                                                                                                                                                                                                                                                                                                                                                                                                                                                                                                                                                                                                                                                                                                                                                                                                                                                                                                                                                                                                                                                                                                                                                   |
| 42180 | cellular ketone metabolic process                    | BiologicalProcess | 3.60E-09 | 2.73E-07     | 55  | 124  | 531 | 2477 | 15608621, 15609890, 15608622, 15609910, 448824754, 15609322, 448824753, 57117044, 57116734, 57117042, 57116735, 15607776, 15610936, 15607644, 15608630, 15608631, 15608576, 15610363, 15607641, 15607688, 15608219, 345462027, 15608474, 15608435, 15607208, 15607782, 15609382, 15607784, 15610974, 15609863, 15608674, 15609917, 15607551, 15607382, 15608741, 15608114, 15607383, 161352467, 15609347, 15610961, 15608974, 15609357, 15607609, 15607330, 15610475, 57117031, 15610384, 15610072, 15609675, 15610525, 15608749, 15608794, 57116972, 15609635, 15610528                                                                                                                                                                                                                                                                                                                                                                                                                                                                                                                                                                                                                                                                                                                                                                                                                                                                                                                                                                                                                                                                                                                                                                                                                                                                                                                                                                                                                                                                                                                                                                                                                                                                                                                                                                                                                                                                                                                                                                                                                                                                                                                                                                                                                                                                                                                                                                                                                                                                                                                                                                                                                                                                                                                                                                                                                                                                                                                                                                                                                                                                     |
| 19752 | carboxylic acid metabolic process                    | BiologicalProcess | 3.86E-09 | 2.73E-07     | 54  | 121  | 531 | 2477 | 15608621, 15609890, 15608622, 15609910, 448824754, 15609322, 448824753, 57117044, 57116734, 57117042, 57116735, 15607776, 15610936, 15607644, 15608630, 15608631, 15608576, 15610363, 15607641, 15608219, 345462027, 15608474, 15608435, 15607208, 15607782, 15609382, 15607784, 15610974, 15609863, 15608674, 15609917, 15607551, 15607382, 15608741, 15608114, 15607383, 161352467, 15609347, 15610961, 15608974, 15609357, 15607609, 15607330, 15610475, 57117031, 15610384, 15610072, 15609675, 15610525, 15608749, 15608794, 57116972, 15610528, 15609635                                                                                                                                                                                                                                                                                                                                                                                                                                                                                                                                                                                                                                                                                                                                                                                                                                                                                                                                                                                                                                                                                                                                                                                                                                                                                                                                                                                                                                                                                                                                                                                                                                                                                                                                                                                                                                                                                                                                                                                                                                                                                                                                                                                                                                                                                                                                                                                                                                                                                                                                                                                                                                                                                                                                                                                                                                                                                                                                                                                                                                                                               |
| 43436 | oxoacid metabolic process                            | BiologicalProcess | 3.86E-09 | 2.73E-07     | 54  | 121  | 531 | 2477 | 15608621, 15609890, 15608622, 15609910, 448824754, 15609322, 448824753, 57117044, 57116734, 57117042, 57116735, 15607776, 15610936, 15607644, 15608630, 15608631, 15608576, 15610363, 15607641, 15608219, 345462027, 15608474, 15608435, 15607208, 15607782, 15609382, 15607784, 15610974, 15609863, 15608674, 15609917, 15607551, 15607382, 15608741, 15608114, 15607383, 161352467, 15609347, 15610961, 15608974, 15609357, 15607609, 15607330, 15610475, 57117031, 15610384, 15610072, 15609675, 15610525, 15608749, 15608794, 57116972, 15610528, 15609635                                                                                                                                                                                                                                                                                                                                                                                                                                                                                                                                                                                                                                                                                                                                                                                                                                                                                                                                                                                                                                                                                                                                                                                                                                                                                                                                                                                                                                                                                                                                                                                                                                                                                                                                                                                                                                                                                                                                                                                                                                                                                                                                                                                                                                                                                                                                                                                                                                                                                                                                                                                                                                                                                                                                                                                                                                                                                                                                                                                                                                                                               |
| 6082  | organic acid metabolic process                       | BiologicalProcess | 3.86E-09 | 2.73E-07     | 54  | 121  | 531 | 2477 | 15608621, 15609890, 15608622, 15609910, 448824754, 15609322, 448824753, 57117044, 57116734, 57117042, 57116735, 15607776, 15610936, 15607644, 15608630, 15608631, 15608576, 15610363, 15607641, 15608219, 345462027, 15608474, 15608435, 15607208, 15607782, 15609382, 15607784, 15610974, 15609863, 15608674, 15609917, 15607551, 15607382, 15608741, 15608114, 15607383, 161352467, 15609347, 15610961, 15608974, 15609357, 15607609, 15607330, 15610475, 57117031, 15610384, 15610072, 15609675, 15610525, 15608749, 15608794, 57116972, 15610528, 15609635                                                                                                                                                                                                                                                                                                                                                                                                                                                                                                                                                                                                                                                                                                                                                                                                                                                                                                                                                                                                                                                                                                                                                                                                                                                                                                                                                                                                                                                                                                                                                                                                                                                                                                                                                                                                                                                                                                                                                                                                                                                                                                                                                                                                                                                                                                                                                                                                                                                                                                                                                                                                                                                                                                                                                                                                                                                                                                                                                                                                                                                                               |
| 8150  | biological_process                                   | BiologicalProcess | 3.08E-08 | 2.06E-06     | 351 | 1381 | 531 | 2477 | 15611000, 15610945, 448824799, 15610139, 448824796, 448824797, 57116734, 57116735, 15609277, 15610805, 15610678, 15610041, 15607873, 15608523, 15610532, 15608520, 15610936, 15607541, 15607492, 15608734, 15607491, 15610146, 15608527, 15610937, 15607688, 15610692, 15607938, 15607498, 345462027, 57116724, 15607208, 15609282, 15608530, 15608531, 15609591, 15607551, 15607382, 57117131, 15607383, 15608114, 15607847, 15607384, 15610019, 15607846, 15607651, 15607385, 15608112, 15607845, 15609599, 161352467, 15609494, 15610961, 15609495, 57117128, 15608313, 15610652, 15607951, 15607854, 15609298, 15607855, 15611016, 15609395, 15610553, 15607548, 15611017, 15610554, 15610572, 15610166, 15607563, 15607564, 15607856, 57116747, 15607859, 15610027, 15607858, 15608613, 15610026, 15610032, 15607961, 15607862, 15609890, 15609751, 15608621, 15608622, 448824757, 15608767, 15608768, 448824754, 448824753, 15610705, 15608234, 15610704, 15608372, 15610706, 15609234, 15608238, 15607776, 15607269, 15608399, 15608379, 15607644, 15608630, 15609614, 15608631, 15607352, 57116768, 57116767, 15607641, 15608776, 15608219, 15610106, 15610104, 15608779, 15609761, 15610102, 15609760, 448824761, 15608774, 15608386, 15609249, 15607782, 15609382, 15607784, 15608769, 15609246, 15608380, 15607151, 15607780, 15609778, 15607488, 15610411, 15608741, 15610416, 15610926, 15610417, 15610927, 15608739, 15607148, 15609258, 15610728, 15609352, 15607506, 15607795, 15610121, 15607504, 15607792, 15607791, 15609211, 15609359, 15607603, 15609357, 15607609, 15610421, 15607330, 15607913, 15607475, 15607912, 57116786, 57116903, 15607525, 15610123, 448824785, 15608755, 15607331, 15610525, 15610719, 15609229, 15608749, 15610717, 15610132, 448824781, 15608341, 15610814, 15607279, 15607616, 15610812, 15610528, 15610745, 15609910, 15609324, 15608283, 15609322, 57117044, 15609848, 57117042, 15608463, 57117041, 15609661, 15610226, 15610225, 15609521, 15610224, 15608086, 15610223, 15609664, 57117051, 15608154, 15608837, 15610363, 15609923, 15610733, 15610360, 15610734, 15609117, 15610870, 15608295, 15609315, 15608474, 15608157, 15609013, 15608091, 15608158, 15608092, 15609510, 15608097, 15609863, 15608674, 15609917, 15610359, 15609639, 15610764, 15608486, 15608165, 15608163, 15609142, 15607196, 15608586, 15608969, 15608587, 15608262, 15609348, 15609347, 15608067, 15609549, 15608682, 15608788, 15609834, 15609640, 15608974, 15608833, 15609648, 15609332, 15609436, 15609133, 57117031, 15608273, 15609337, 15608958, 15609528, 15609139, 15610242, 15608490, 15609840, 15608794, 448824735, 15608964, 15608071, 15608821, 15608793, 15609635, 15608792, 15609637, 15609743, 57116993, 15610275, 57116990, 15609168, 15609169, 15607840, 15610784, 15609069, 57117081, 57117137, 15610782, 15607844, 15608424, 15609422, 15607841, 15610982, 57116800, 57117147, 15610985, 15607573, 15610269, 15609566, 15609565, 15610988, 15610472, 57116987, 57116704, 15608043, 15608576, 15608575, 15608574, 15610090, 15608432, 15610595, 15608437, 15608435, 15607823, 15607825, 15610974, 15607581, 15607586, 15609692, 15608050, 15610188, 15609045, 15608447, 15608446, 15610065, 15608449, 15610064, 15608448, 15609976, 15610391, 15609585, 57117168, 15610593, 15608876, 15610594, 15609581, 15610056, 15608024, 15610492, 15608451, 15608450, 15610475, 15610897, 15610579, 15610384, 15610077, 15610382, 15609982, 15608455, 15610072, 15609675, 15610995, 15609674, 15609677, 15607807, 15607808, 15610994, 15609579, 57116972, 15611050, 15610276, 15609671, 15609670 |
| 44281 | small molecule metabolic process                     | BiologicalProcess | 3.56E-08 | 2.26E-06     | 83  | 228  | 531 | 2477 | 57116993, 15609890, 15608621, 57116990, 15609910, 15608622, 57117081, 15609322, 448824754, 57117044, 448824753, 15609848, 57117042, 57116734, 57116735, 15610225, 15609521, 15610704, 15607873, 15610706, 15607776, 15608086, 15610936, 15607644, 15608630, 57117051, 15608631, 15608734, 15608576, 15610363, 15607641, 15607688, 15608219, 15610870, 15608295, 345462027, 15610102, 15608474, 15608157, 15608435, 15607208, 15607782, 15609382, 15607784, 15610974, 15608769, 15609863, 15608674, 15610188, 15609917, 15608530, 15608486, 15607551, 15608741, 15607382, 15607383, 15608114, 15609348, 15609347, 161352467, 15610961, 15607148, 15609834, 15608974, 15607504, 15608833, 15609357, 15607609, 15607913, 15607330, 15610475, 15607475, 57117031, 15610384, 15610072, 15609675, 15610525, 15608794, 15608749, 57116972, 15609635, 15610528, 15609743                                                                                                                                                                                                                                                                                                                                                                                                                                                                                                                                                                                                                                                                                                                                                                                                                                                                                                                                                                                                                                                                                                                                                                                                                                                                                                                                                                                                                                                                                                                                                                                                                                                                                                                                                                                                                                                                                                                                                                                                                                                                                                                                                                                                                                                                                                                                                                                                                                                                                                                                                                                                                                                                                                                                                                             |
| 9987  | cellular process                                     | BiologicalProcess | 3.46E-07 | 2.08E-05     | 151 | 506  | 531 | 2477 | 15610945, 448824799, 15609910, 15609324, 15608283, 15609322, 57117044, 15609848, 57117042, 57116734, 57116735, 15610225, 15609521, 15607873, 15608086, 15610936, 57117051, 15607492, 15608734, 15610363, 15607491, 15610733, 15610937, 15607688, 15609117, 15610870, 15608295, 345462027, 15609315, 15608474, 15608157, 15607208, 15609282, 15609863, 15608674, 15609917, 15608530, 15610359, 15609639, 15610764, 15608486, 15609591, 15609142, 15607551, 15607196, 15607382, 15607383, 15608114, 15610019, 15609348, 15609347, 15609599, 161352467, 15610961, 15608313, 15609834, 15608974, 15608833, 15609395, 15610553, 15611017, 15610554, 15609436, 15609133, 57117031, 15609528, 15610032, 15608794, 15608964, 15608071, 15609635, 15609743, 57116993, 15609890, 15608621, 57116990, 15609168, 15608622, 15609069, 57117081, 448824754, 448824753, 15609422, 15609234, 15607776, 15607573, 15610269, 15609566, 15609565, 57116987, 57116704, 15608399, 15607644, 15608630, 15608631, 15607352, 15608576, 15607641, 15610090, 15608219, 15608776, 15610102, 15609761, 15608437, 15609760, 15608435, 15608386, 15609249, 15609381, 15607782, 15609382, 15607784, 15610974, 15609246, 15608769, 15608380, 15610188, 15609045, 15610926, 15608741, 15610065, 15610927, 15607148, 15610728, 15609352, 15607795, 15610121, 15607504, 15607603, 15609357, 15607609, 15607330, 15607913, 15610475, 15607475, 15610384, 57116903, 15610077, 15610382, 448824785, 15610123, 15610072, 15609675, 15610525, 15610719, 15608749, 15610717, 57116972, 15611050, 15607616, 15610528                                                                                                                                                                                                                                                                                                                                                                                                                                                                                                                                                                                                                                                                                                                                                                                                                                                                                                                                                                                                                                                                                                                                                                                                                                                                                                                                                                                                                                                                                                                                                                                                                                                                                                                                                                                                                                                                                                                                                                                                                                                                   |
| 6519  | cellular amino acid and derivative metabolic process | BiologicalProcess | 6.32E-07 | 3.62E-05     | 28  | 54   | 531 | 2477 | 15609890, 15609910, 15607551, 15608741, 448824753, 57117044, 15609347, 57117042, 15609357, 15607330, 15607913, 15607644, 15607641, 15608219, 57117031, 15610384, 345462027, 15608474, 15608435, 15609675, 15608749, 15608794, 15610974, 15609863, 57116972, 15608674, 15609917, 15610528                                                                                                                                                                                                                                                                                                                                                                                                                                                                                                                                                                                                                                                                                                                                                                                                                                                                                                                                                                                                                                                                                                                                                                                                                                                                                                                                                                                                                                                                                                                                                                                                                                                                                                                                                                                                                                                                                                                                                                                                                                                                                                                                                                                                                                                                                                                                                                                                                                                                                                                                                                                                                                                                                                                                                                                                                                                                                                                                                                                                                                                                                                                                                                                                                                                                                                                                                     |
| 6520  | cellular amino acid metabolic process                | BiologicalProcess | 1.39E-06 | 7.25E-05     | 25  | 47   | 531 | 2477 | 15609890, 15609910, 15607551, 15608741, 448824753, 57117044, 15609347, 57117042, 15609357, 15607330, 15607641, 15608219, 57117031, 15610384, 345462027, 15608474, 15608435, 15609675, 15608749, 15608794, 15610974, 15609863, 57116972, 15608674, 15609917                                                                                                                                                                                                                                                                                                                                                                                                                                                                                                                                                                                                                                                                                                                                                                                                                                                                                                                                                                                                                                                                                                                                                                                                                                                                                                                                                                                                                                                                                                                                                                                                                                                                                                                                                                                                                                                                                                                                                                                                                                                                                                                                                                                                                                                                                                                                                                                                                                                                                                                                                                                                                                                                                                                                                                                                                                                                                                                                                                                                                                                                                                                                                                                                                                                                                                                                                                                   |
| 43933 | macromolecular complex subunit organization          | BiologicalProcess | 1.48E-06 | 7.42E-05     | 35  | 77   | 531 | 2477 | 15609890, 15608621, 15609168, 15609910, 15607196, 15610019, 57117042, 15610982, 15609258, 15610706, 15610056, 15607504, 15608833, 15609566, 15609565, 15609359, 15609357, 15608379, 15610553, 15610554                                                                                                                                                                                                                                                                                                                                                                                                                                                                                                                                                                                                                                                                                                                                                                                                                                                                                                                                                                                                                                                                                                                                                                                                                                                                                                                                                                                                                                                                                                                                                                                                                                                                                                                                                                                                                                                                                                                                                                                                                                                                                                                                                                                                                                                                                                                                                                                                                                                                                                                                                                                                                                                                                                                                                                                                                                                                                                                                                                                                                                                                                                                                                                                                                                                                                                                                                                                                                                       |

|       |                                                |                   |          |          |     |     |     |      |                                                                                                                                                                                                                                                                                                                                                                                                                                                                                                                                                                                                                                                                                                                                                                                                                                                                                                                                                                                                                                                                                                                                                                                                                                                                                                                                                                              |
|-------|------------------------------------------------|-------------------|----------|----------|-----|-----|-----|------|------------------------------------------------------------------------------------------------------------------------------------------------------------------------------------------------------------------------------------------------------------------------------------------------------------------------------------------------------------------------------------------------------------------------------------------------------------------------------------------------------------------------------------------------------------------------------------------------------------------------------------------------------------------------------------------------------------------------------------------------------------------------------------------------------------------------------------------------------------------------------------------------------------------------------------------------------------------------------------------------------------------------------------------------------------------------------------------------------------------------------------------------------------------------------------------------------------------------------------------------------------------------------------------------------------------------------------------------------------------------------|
| 51259 | protein oligomerization                        | BiologicalProcess | 2.27E-06 | 1.01E-04 | 34  | 75  | 531 | 2477 | 15608621, 15609890, 15609168, 15609910, 15607196, 57117042, 15610982, 15609258, 15610706, 15610056, 15607504, 15608833, 15609566, 15609565, 15609359, 15609357, 15608379, 15610553, 15610554, 15610936, 15607641, 15610733, 15607688, 15610384, 15610102, 15608437, 15608157, 15609315, 15608158, 15609674, 15608794, 15610974, 15608341, 15609917                                                                                                                                                                                                                                                                                                                                                                                                                                                                                                                                                                                                                                                                                                                                                                                                                                                                                                                                                                                                                           |
| 44237 | cellular metabolic process                     | BiologicalProcess | 2.80E-06 | 1.20E-04 | 120 | 394 | 531 | 2477 | 15609910, 15608283, 15609324, 15609322, 57117044, 57116734, 57117042, 15609848, 57116735, 15610225, 15609521, 15607873, 15608086, 15610936, 57117051, 15608734, 15607491, 15610363, 15610733, 15607688, 345462027, 15608295, 15610870, 15608157, 15608474, 15609315, 15607208, 15609863, 15608674, 15608530, 15609917, 15610764, 15609639, 15608486, 15609591, 15607551, 15607382, 15608114, 15607383, 15610019, 15609348, 15609347, 161352467, 15610961, 15608313, 15609834, 15608974, 15608833, 15610553, 57117031, 15609528, 15608794, 15608964, 15609635, 15609743, 57116993, 15609890, 15608621, 57116990, 15609168, 15608622, 15609069, 57117081, 448824754, 448824753, 15609422, 15609234, 15607776, 57116987, 57116704, 15608399, 15607644, 15608630, 15608631, 15608576, 15607641, 15610090, 15608219, 15610102, 15608437, 15608435, 15609249, 15608386, 15609381, 15607782, 15609382, 15607784, 15610974, 15609246, 15608769, 15608380, 15610188, 15609045, 15610926, 15608741, 15610927, 15607148, 15610728, 15610121, 15607504, 15609357, 15607609, 15607913, 15607330, 15610475, 15607475, 15610384, 57116903, 15610077, 15610382, 448824785, 15610123, 15610072, 15609675, 15610525, 15610717, 15608749, 57116972, 15611050, 15610528                                                                                                                          |
| 6461  | protein complex assembly                       | BiologicalProcess | 3.29E-06 | 1.28E-04 | 34  | 76  | 531 | 2477 | 15608621, 15609890, 15609168, 15609910, 15607196, 57117042, 15610982, 15609258, 15610706, 15610056, 15607504, 15608833, 15609566, 15609565, 15609359, 15609357, 15608379, 15610553, 15610554, 15610936, 15607641, 15610733, 15607688, 15610384, 15610102, 15608437, 15608157, 15609315, 15608158, 15609674, 15608794, 15610974, 15608341, 15609917                                                                                                                                                                                                                                                                                                                                                                                                                                                                                                                                                                                                                                                                                                                                                                                                                                                                                                                                                                                                                           |
| 70271 | protein complex biogenesis                     | BiologicalProcess | 3.29E-06 | 1.28E-04 | 34  | 76  | 531 | 2477 | 15608621, 15609890, 15609168, 15609910, 15607196, 57117042, 15610982, 15609258, 15610706, 15610056, 15607504, 15608833, 15609566, 15609565, 15609359, 15609357, 15608379, 15610553, 15610554, 15610936, 15607641, 15610733, 15607688, 15610384, 15610102, 15608437, 15608157, 15609315, 15608158, 15609674, 15608794, 15610974, 15608341, 15609917                                                                                                                                                                                                                                                                                                                                                                                                                                                                                                                                                                                                                                                                                                                                                                                                                                                                                                                                                                                                                           |
| 65003 | macromolecular complex assembly                | BiologicalProcess | 3.29E-06 | 1.28E-04 | 34  | 76  | 531 | 2477 | 15608621, 15609890, 15609168, 15609910, 15607196, 57117042, 15610982, 15609258, 15610706, 15610056, 15607504, 15608833, 15609566, 15609565, 15609359, 15609357, 15608379, 15610553, 15610554, 15610936, 15607641, 15610733, 15607688, 15610384, 15610102, 15608437, 15608157, 15609315, 15608158, 15609674, 15608794, 15610974, 15608341, 15609917                                                                                                                                                                                                                                                                                                                                                                                                                                                                                                                                                                                                                                                                                                                                                                                                                                                                                                                                                                                                                           |
| 44283 | small molecule biosynthetic process            | BiologicalProcess | 4.11E-06 | 1.55E-04 | 50  | 130 | 531 | 2477 | 15608621, 15609890, 57116990, 15608622, 15609910, 57117081, 448824754, 57117044, 57117042, 57116735, 15607873, 15607776, 15610936, 15607644, 57117051, 15608734, 15610363, 15608576, 15607641, 15607688, 15608219, 345462027, 15608157, 15608474, 15608435, 15607782, 15609382, 15607784, 15610974, 15609863, 15610188, 15609348, 15609347, 15610961, 15608833, 15609357, 15607609, 15607330, 15607475, 15610072, 15609675, 15610525, 15608749, 15608794, 57116972, 15610528, 15609743                                                                                                                                                                                                                                                                                                                                                                                                                                                                                                                                                                                                                                                                                                                                                                                                                                                                                       |
| 51260 | protein homooligomerization                    | BiologicalProcess | 5.03E-06 | 1.83E-04 | 33  | 74  | 531 | 2477 | 15608621, 15609890, 15609168, 15609910, 15607196, 57117042, 15610982, 15609258, 15610706, 15610056, 15607504, 15608833, 15609566, 15609565, 15609359, 15609357, 15608379, 15610553, 15610554, 15610936, 15607641, 15610733, 15607688, 15610384, 15608437, 15608157, 15609315, 15608158, 15609674, 15608794, 15610974, 15608341, 15609917                                                                                                                                                                                                                                                                                                                                                                                                                                                                                                                                                                                                                                                                                                                                                                                                                                                                                                                                                                                                                                     |
| 6732  | coenzyme metabolic process                     | BiologicalProcess | 5.86E-06 | 2.07E-04 | 24  | 47  | 531 | 2477 | 15607913, 57116993, 15609639, 57116990, 15610475, 15608734, 15609591, 15607688, 57116903, 15607383, 15608283, 15610077, 15610102, 161352467, 15607208, 15608313, 15609381, 15608769, 15608380, 15608974, 15608833, 15608530, 57116704, 15609743                                                                                                                                                                                                                                                                                                                                                                                                                                                                                                                                                                                                                                                                                                                                                                                                                                                                                                                                                                                                                                                                                                                              |
| 44106 | cellular amine metabolic process               | BiologicalProcess | 6.09E-06 | 2.09E-04 | 25  | 50  | 531 | 2477 | 15609890, 15609910, 15607551, 15608741, 448824753, 57117044, 15609347, 57117042, 15609357, 15607330, 15607641, 15608219, 57117031, 15610384, 345462027, 15608474, 15608435, 15609675, 15608749, 15608794, 15610974, 15609863, 57116972, 15608674, 15609917                                                                                                                                                                                                                                                                                                                                                                                                                                                                                                                                                                                                                                                                                                                                                                                                                                                                                                                                                                                                                                                                                                                   |
| 51187 | cofactor catabolic process                     | BiologicalProcess | 7.34E-06 | 2.45E-04 | 9   | 10  | 531 | 2477 | 15607913, 15610728, 15610475, 15609591, 15608380, 57116903, 161352467, 57116704, 15607208                                                                                                                                                                                                                                                                                                                                                                                                                                                                                                                                                                                                                                                                                                                                                                                                                                                                                                                                                                                                                                                                                                                                                                                                                                                                                    |
| 8152  | metabolic process                              | BiologicalProcess | 9.79E-06 | 3.14E-04 | 132 | 452 | 531 | 2477 | 15609910, 15608283, 15609324, 15609322, 57117044, 57116734, 57117042, 15609848, 57116735, 15610225, 15609521, 15607873, 15608086, 15610936, 57117051, 15608734, 15610363, 15607491, 15610733, 15607688, 15610870, 345462027, 15608295, 15609315, 15608474, 15608157, 15607208, 15609863, 15608674, 15609917, 15608530, 15609639, 15610764, 15608486, 15609591, 15607551, 15607382, 15607383, 15608114, 15610019, 15609348, 15608112, 15609347, 161352467, 15610961, 15608313, 15609834, 15608974, 15608833, 15610553, 15607548, 57117031, 15609528, 15609139, 15608794, 15608964, 15609635, 15609743, 57116993, 15609890, 15608621, 57116990, 15609168, 15608622, 15609069, 57117081, 448824754, 448824753, 15609422, 15610704, 15610706, 15609234, 15607776, 15609565, 57116987, 57116704, 15608399, 15607644, 15608630, 15608631, 15608576, 15607641, 15610090, 15608219, 15610102, 15608437, 15608435, 15609249, 15608386, 15609381, 15607782, 15609382, 15607784, 15610974, 15609246, 15608769, 15608380, 15610188, 15609045, 15610926, 15610416, 15608741, 15610065, 15610927, 15610417, 15607148, 15610728, 15610121, 15607504, 15607603, 15609357, 15607609, 15607913, 15607330, 15610421, 15610475, 15607475, 15610384, 57116903, 15610077, 15610382, 448824785, 15610123, 15610072, 15609675, 15610525, 15610717, 15608749, 448824781, 57116972, 15611050, 15610528 |
| 44085 | cellular component biogenesis                  | BiologicalProcess | 9.92E-06 | 3.14E-04 | 51  | 137 | 531 | 2477 | 15610945, 15608621, 15609890, 15608622, 15609910, 15609168, 57117042, 57116735, 15610982, 15610706, 15607776, 15609566, 15609565, 15608379, 15610936, 15607644, 15607641, 15610733, 15610937, 15610090, 15607688, 15610102, 15608157, 15609315, 15608437, 15608158, 15607782, 15607784, 15609282, 15610974, 15609917, 15610926, 15607196, 15608114, 15610927, 15610065, 15609258, 15610056, 15607504, 15608833, 15609359, 15609357, 15610553, 15610554, 15610384, 15610077, 15610072, 15609674, 15608794, 15608341, 15610528                                                                                                                                                                                                                                                                                                                                                                                                                                                                                                                                                                                                                                                                                                                                                                                                                                                 |
| 6099  | tricarboxylic acid cycle                       | BiologicalProcess | 2.02E-05 | 5.78E-04 | 7   | 7   | 531 | 2477 | 15610475, 15609591, 15608380, 57116903, 161352467, 57116704, 15607208                                                                                                                                                                                                                                                                                                                                                                                                                                                                                                                                                                                                                                                                                                                                                                                                                                                                                                                                                                                                                                                                                                                                                                                                                                                                                                        |
| 6084  | acetyl-CoA metabolic process                   | BiologicalProcess | 2.02E-05 | 5.78E-04 | 7   | 7   | 531 | 2477 | 15610475, 15609591, 15608380, 57116903, 161352467, 57116704, 15607208                                                                                                                                                                                                                                                                                                                                                                                                                                                                                                                                                                                                                                                                                                                                                                                                                                                                                                                                                                                                                                                                                                                                                                                                                                                                                                        |
| 46356 | acetyl-CoA catabolic process                   | BiologicalProcess | 2.02E-05 | 5.78E-04 | 7   | 7   | 531 | 2477 | 15610475, 15609591, 15608380, 57116903, 161352467, 57116704, 15607208                                                                                                                                                                                                                                                                                                                                                                                                                                                                                                                                                                                                                                                                                                                                                                                                                                                                                                                                                                                                                                                                                                                                                                                                                                                                                                        |
| 16043 | cellular component organization                | BiologicalProcess | 2.41E-05 | 6.74E-04 | 42  | 109 | 531 | 2477 | 15609890, 15608621, 15609168, 15609910, 15607196, 15610065, 15610019, 57117042, 15610982, 15609258, 15610706, 15610056, 15607504, 15608833, 15609566, 15609565, 15609359, 15609357, 15608379, 15610553, 15610554, 15610936, 15607644, 15610733, 15607641, 15610090, 15610937, 15607688, 15610384, 15610077, 15610123, 15610102, 15608437, 15609315, 15608157, 15608158, 15610072, 15609674, 15608794, 15610974, 15608341, 15609917                                                                                                                                                                                                                                                                                                                                                                                                                                                                                                                                                                                                                                                                                                                                                                                                                                                                                                                                           |
| 8652  | cellular amino acid biosynthetic process       | BiologicalProcess | 3.10E-05 | 8.00E-04 | 19  | 36  | 531 | 2477 | 15607330, 15609890, 15607641, 15609910, 15608219, 15608741, 15609347, 345462027, 57117044, 15608474, 57117042, 15608435, 15609675, 15608794, 15608749, 15610974, 15609863, 57116972, 15609357                                                                                                                                                                                                                                                                                                                                                                                                                                                                                                                                                                                                                                                                                                                                                                                                                                                                                                                                                                                                                                                                                                                                                                                |
| 9309  | amine biosynthetic process                     | BiologicalProcess | 3.10E-05 | 8.00E-04 | 19  | 36  | 531 | 2477 | 15607330, 15609890, 15607641, 15609910, 15608219, 15608741, 15609347, 345462027, 57117044, 15608474, 57117042, 15608435, 15609675, 15608794, 15608749, 15610974, 15609863, 57116972, 15609357                                                                                                                                                                                                                                                                                                                                                                                                                                                                                                                                                                                                                                                                                                                                                                                                                                                                                                                                                                                                                                                                                                                                                                                |
| 9109  | coenzyme catabolic process                     | BiologicalProcess | 3.13E-05 | 8.00E-04 | 8   | 9   | 531 | 2477 | 15607913, 15610475, 15609591, 15608380, 57116903, 161352467, 57116704, 15607208                                                                                                                                                                                                                                                                                                                                                                                                                                                                                                                                                                                                                                                                                                                                                                                                                                                                                                                                                                                                                                                                                                                                                                                                                                                                                              |
| 22607 | cellular component assembly                    | BiologicalProcess | 8.51E-05 | 2.01E-03 | 40  | 107 | 531 | 2477 | 15609890, 15608621, 15609168, 15609910, 15607196, 15610065, 57117042, 15610982, 15609258, 15610706, 15610056, 15607504, 15608833, 15609566, 15609565, 15609359, 15609357, 15608379, 15610553, 15610554, 15610936, 15607644, 15607641, 15610733, 15610090, 15610937, 15607688, 15610384, 15610077, 15610102, 15608437, 15608157, 15609315, 15608158, 15610072, 15609674, 15608794, 15610974, 15608341, 15609917                                                                                                                                                                                                                                                                                                                                                                                                                                                                                                                                                                                                                                                                                                                                                                                                                                                                                                                                                               |
| 9060  | aerobic respiration                            | BiologicalProcess | 1.31E-04 | 2.86E-03 | 7   | 8   | 531 | 2477 | 15610475, 15609591, 15608380, 57116903, 161352467, 57116704, 15607208                                                                                                                                                                                                                                                                                                                                                                                                                                                                                                                                                                                                                                                                                                                                                                                                                                                                                                                                                                                                                                                                                                                                                                                                                                                                                                        |
| 45333 | cellular respiration                           | BiologicalProcess | 1.31E-04 | 2.86E-03 | 7   | 8   | 531 | 2477 | 15610475, 15609591, 15608380, 57116903, 161352467, 57116704, 15607208                                                                                                                                                                                                                                                                                                                                                                                                                                                                                                                                                                                                                                                                                                                                                                                                                                                                                                                                                                                                                                                                                                                                                                                                                                                                                                        |
| 10039 | response to iron ion                           | BiologicalProcess | 1.31E-04 | 2.86E-03 | 7   | 8   | 531 | 2477 | 15607825, 15609168, 15610733, 15610360, 15608613, 15609013, 15607151                                                                                                                                                                                                                                                                                                                                                                                                                                                                                                                                                                                                                                                                                                                                                                                                                                                                                                                                                                                                                                                                                                                                                                                                                                                                                                         |
| 9308  | amine metabolic process                        | BiologicalProcess | 1.33E-04 | 2.86E-03 | 26  | 61  | 531 | 2477 | 15609890, 15609910, 15607551, 15608741, 448824753, 57117044, 15609347, 57117042, 57116987, 15609357, 15607330, 15607641, 15608219, 57117031, 15610384, 345462027, 15608474, 15608435, 15609675, 15608749, 15608794, 15610974, 15609863, 57116972, 15608674, 15609917                                                                                                                                                                                                                                                                                                                                                                                                                                                                                                                                                                                                                                                                                                                                                                                                                                                                                                                                                                                                                                                                                                         |
| 71767 | mycolic acid metabolic process                 | BiologicalProcess | 1.99E-04 | 3.93E-03 | 10  | 15  | 531 | 2477 | 15610936, 15607782, 15607644, 15608621, 15607784, 15607776, 15608622, 15608114, 15610528, 57116735                                                                                                                                                                                                                                                                                                                                                                                                                                                                                                                                                                                                                                                                                                                                                                                                                                                                                                                                                                                                                                                                                                                                                                                                                                                                           |
| 71768 | mycolic acid biosynthetic process              | BiologicalProcess | 1.99E-04 | 3.93E-03 | 10  | 15  | 531 | 2477 | 15610936, 15607782, 15607644, 15608621, 15607784, 15607776, 15608622, 15608114, 15610528, 57116735                                                                                                                                                                                                                                                                                                                                                                                                                                                                                                                                                                                                                                                                                                                                                                                                                                                                                                                                                                                                                                                                                                                                                                                                                                                                           |
| 51186 | cofactor metabolic process                     | BiologicalProcess | 2.74E-04 | 5.33E-03 | 28  | 70  | 531 | 2477 | 57116993, 57116990, 15609639, 15608486, 15609591, 15608283, 15607383, 161352467, 15609848, 15608313, 15610728, 15609521, 15608974, 15608833, 57116704, 15607913, 15610475, 15608734, 15607688, 57116903, 15610077, 15610102, 15607208, 15609381, 15608769, 15608380, 15608530, 15609743                                                                                                                                                                                                                                                                                                                                                                                                                                                                                                                                                                                                                                                                                                                                                                                                                                                                                                                                                                                                                                                                                      |
| 32787 | monocarboxylic acid metabolic process          | BiologicalProcess | 7.87E-04 | 1.46E-02 | 26  | 67  | 531 | 2477 | 15608621, 15608622, 15607382, 15608114, 15607383, 448824754, 15609322, 15610961, 57116734, 57116735, 15608974, 15607776, 15607609, 15610936, 15607644, 15608630, 15610475, 15608631, 15608576, 15610072, 15607208, 15610525, 15607782, 15609382, 15607784, 15610528                                                                                                                                                                                                                                                                                                                                                                                                                                                                                                                                                                                                                                                                                                                                                                                                                                                                                                                                                                                                                                                                                                          |
| 6091  | generation of precursor metabolites and energy | BiologicalProcess | 8.45E-04 | 1.54E-02 | 10  | 17  | 531 | 2477 | 15610475, 15609591, 15608576, 15608380, 15607504, 15608086, 57116903, 161352467, 57116704, 15607208                                                                                                                                                                                                                                                                                                                                                                                                                                                                                                                                                                                                                                                                                                                                                                                                                                                                                                                                                                                                                                                                                                                                                                                                                                                                          |

|       |                                                                                       |                   |          |          |     |     |     |      |                                                                                                                                                                                                                                                                                                                                                                                                                                                                                                                                                                                                                                                                                                                                                                                                                                                                                                                                                                                                                                                                                                                                                                                                                                                                                                                                                                                                                                                                                                                                                                                                                                                                                                                                                                                                                                                                                                                       |
|-------|---------------------------------------------------------------------------------------|-------------------|----------|----------|-----|-----|-----|------|-----------------------------------------------------------------------------------------------------------------------------------------------------------------------------------------------------------------------------------------------------------------------------------------------------------------------------------------------------------------------------------------------------------------------------------------------------------------------------------------------------------------------------------------------------------------------------------------------------------------------------------------------------------------------------------------------------------------------------------------------------------------------------------------------------------------------------------------------------------------------------------------------------------------------------------------------------------------------------------------------------------------------------------------------------------------------------------------------------------------------------------------------------------------------------------------------------------------------------------------------------------------------------------------------------------------------------------------------------------------------------------------------------------------------------------------------------------------------------------------------------------------------------------------------------------------------------------------------------------------------------------------------------------------------------------------------------------------------------------------------------------------------------------------------------------------------------------------------------------------------------------------------------------------------|
| 44249 | cellular biosynthetic process                                                         | BiologicalProcess | 1.12E-03 | 1.95E-02 | 70  | 236 | 531 | 2477 | 15608621, 15609890, 57116990, 15608622, 15609910, 15609324, 57117081, 448824754, 57117044, 57117042, 15609848, 15609422, 57116735, 15610225, 15609521, 15607873, 15607776, 15610936, 15607644, 57117051, 15608734, 15608576, 15610363, 15607641, 15610090, 15607688, 15608219, 15610870, 345462027, 15610102, 15608437, 15609315, 15608474, 15608157, 15608435, 15607782, 15609382, 15607784, 15610974, 15608769, 15609863, 15608674, 15610188, 15608530, 15609639, 15608486, 15607382, 15610926, 15608741, 15608114, 15610927, 15610019, 15609348, 15609347, 15610961, 15608313, 15608833, 15609357, 15607609, 15607330, 15607475, 15610072, 15609675, 15610525, 15608794, 15610717, 15608749, 57116972, 15610528, 15609743                                                                                                                                                                                                                                                                                                                                                                                                                                                                                                                                                                                                                                                                                                                                                                                                                                                                                                                                                                                                                                                                                                                                                                                          |
| 44238 | primary metabolic process                                                             | BiologicalProcess | 1.19E-03 | 2.05E-02 | 101 | 364 | 531 | 2477 | 15609910, 15609324, 15609322, 57117044, 57116734, 57117042, 57116735, 15610225, 15607873, 15608086, 15610936, 57117051, 15608734, 15607491, 15610733, 345462027, 15610870, 15608157, 15608474, 15609315, 15607208, 15609863, 15608674, 15608530, 15609917, 15607551, 15607382, 15608114, 15607383, 15610019, 15609348, 15609347, 15610961, 15609834, 15608974, 15608833, 15610553, 57117031, 15609139, 15608794, 15608964, 15608621, 15609890, 57116993, 57116990, 15608622, 15609168, 57117081, 15609069, 448824754, 448824753, 15609422, 15610704, 15610706, 15609234, 15607776, 57116987, 15608399, 15607644, 15608576, 15607641, 15610090, 15608219, 15610102, 15608437, 15608435, 15609249, 15608386, 15607782, 15609382, 15607784, 15609246, 15608769, 15610974, 15608380, 15610188, 15610926, 15608741, 15610065, 15610927, 15607148, 15610121, 15607504, 15609357, 15607609, 15607913, 15607330, 15610475, 15607475, 15610384, 15610382, 448824785, 15610123, 15610072, 15609675, 15610525, 15610717, 15608749, 57116972, 15611050, 15610528                                                                                                                                                                                                                                                                                                                                                                                                                                                                                                                                                                                                                                                                                                                                                                                                                                                                  |
| 70589 | cellular component macromolecule biosynthetic process                                 | BiologicalProcess | 1.76E-03 | 2.90E-02 | 12  | 24  | 531 | 2477 | 15610936, 15607782, 15607644, 15608621, 15607784, 15607776, 15608622, 15610926, 15610927, 15608114, 15610528, 57116735                                                                                                                                                                                                                                                                                                                                                                                                                                                                                                                                                                                                                                                                                                                                                                                                                                                                                                                                                                                                                                                                                                                                                                                                                                                                                                                                                                                                                                                                                                                                                                                                                                                                                                                                                                                                |
| 10382 | cellular cell wall macromolecule metabolic process                                    | BiologicalProcess | 1.76E-03 | 2.90E-02 | 12  | 24  | 531 | 2477 | 15610936, 15607782, 15607644, 15608621, 15607784, 15607776, 15608622, 15610926, 15610927, 15608114, 15610528, 57116735                                                                                                                                                                                                                                                                                                                                                                                                                                                                                                                                                                                                                                                                                                                                                                                                                                                                                                                                                                                                                                                                                                                                                                                                                                                                                                                                                                                                                                                                                                                                                                                                                                                                                                                                                                                                |
| 44038 | cell wall macromolecule biosynthetic process                                          | BiologicalProcess | 1.76E-03 | 2.90E-02 | 12  | 24  | 531 | 2477 | 15610936, 15607782, 15607644, 15608621, 15607784, 15607776, 15608622, 15610926, 15610927, 15608114, 15610528, 57116735                                                                                                                                                                                                                                                                                                                                                                                                                                                                                                                                                                                                                                                                                                                                                                                                                                                                                                                                                                                                                                                                                                                                                                                                                                                                                                                                                                                                                                                                                                                                                                                                                                                                                                                                                                                                |
| 9066  | aspartate family amino acid metabolic process                                         | BiologicalProcess | 1.95E-03 | 3.17E-02 | 8   | 13  | 531 | 2477 | 15609890, 15609863, 15609910, 57117031, 15608219, 15610384, 15609347, 15608435                                                                                                                                                                                                                                                                                                                                                                                                                                                                                                                                                                                                                                                                                                                                                                                                                                                                                                                                                                                                                                                                                                                                                                                                                                                                                                                                                                                                                                                                                                                                                                                                                                                                                                                                                                                                                                        |
| 9059  | macromolecule biosynthetic process                                                    | BiologicalProcess | 2.03E-03 | 3.19E-02 | 17  | 40  | 531 | 2477 | 15610936, 15608621, 15607644, 57117051, 15608622, 15610926, 15608114, 15610927, 15610019, 15608437, 57116735, 15607782, 15607784, 15607776, 15608674, 15610188, 15610528                                                                                                                                                                                                                                                                                                                                                                                                                                                                                                                                                                                                                                                                                                                                                                                                                                                                                                                                                                                                                                                                                                                                                                                                                                                                                                                                                                                                                                                                                                                                                                                                                                                                                                                                              |
| 34645 | cellular macromolecule biosynthetic process                                           | BiologicalProcess | 2.03E-03 | 3.19E-02 | 17  | 40  | 531 | 2477 | 15610936, 15608621, 15607644, 57117051, 15608622, 15610926, 15608114, 15610927, 15610019, 15608437, 57116735, 15607782, 15607784, 15607776, 15608674, 15610188, 15610528                                                                                                                                                                                                                                                                                                                                                                                                                                                                                                                                                                                                                                                                                                                                                                                                                                                                                                                                                                                                                                                                                                                                                                                                                                                                                                                                                                                                                                                                                                                                                                                                                                                                                                                                              |
| 9058  | biosynthetic process                                                                  | BiologicalProcess | 2.07E-03 | 3.19E-02 | 71  | 245 | 531 | 2477 | 15608621, 15609890, 57116990, 15608622, 15609910, 15609324, 57117081, 448824754, 57117044, 57117042, 15609848, 15609422, 57116735, 15610225, 15609521, 15607873, 15607776, 15610936, 15607644, 57117051, 15608734, 15608576, 15610363, 15607641, 15610090, 15607688, 15608219, 15610870, 345462027, 15610102, 15608437, 15609315, 15608474, 15608157, 15608435, 15607782, 15609382, 15607784, 15610974, 15608769, 15609863, 15608674, 15610188, 15608530, 15609639, 15608486, 15607382, 15610926, 15608741, 15610065, 15608114, 15610927, 15610019, 15609348, 15609347, 15610961, 15608313, 15608833, 15609357, 15607609, 15607330, 15607475, 15610072, 15609675, 15610525, 15608794, 15610717, 15608749, 57116972, 15610528, 15609743                                                                                                                                                                                                                                                                                                                                                                                                                                                                                                                                                                                                                                                                                                                                                                                                                                                                                                                                                                                                                                                                                                                                                                                |
| 10035 | response to inorganic substance                                                       | BiologicalProcess | 2.38E-03 | 3.43E-02 | 15  | 34  | 531 | 2477 | 15609045, 15609778, 15607491, 15609436, 15609168, 15610360, 15610733, 15608613, 15610870, 15609013, 15609495, 15607331, 15610225, 15607825, 15607151                                                                                                                                                                                                                                                                                                                                                                                                                                                                                                                                                                                                                                                                                                                                                                                                                                                                                                                                                                                                                                                                                                                                                                                                                                                                                                                                                                                                                                                                                                                                                                                                                                                                                                                                                                  |
| 9116  | nucleoside metabolic process                                                          | BiologicalProcess | 2.39E-03 | 3.43E-02 | 9   | 16  | 531 | 2477 | 15607644, 15607475, 15609834, 15608769, 15608974, 15610384, 15610102, 15608530, 15610528                                                                                                                                                                                                                                                                                                                                                                                                                                                                                                                                                                                                                                                                                                                                                                                                                                                                                                                                                                                                                                                                                                                                                                                                                                                                                                                                                                                                                                                                                                                                                                                                                                                                                                                                                                                                                              |
| 34641 | cellular nitrogen compound metabolic process                                          | BiologicalProcess | 2.40E-03 | 3.43E-02 | 51  | 166 | 531 | 2477 | 15609890, 57116993, 57116990, 15609910, 57117081, 448824753, 57117044, 57117042, 15607873, 15608399, 15607644, 57117051, 15608734, 15607641, 15610733, 15608219, 15610102, 345462027, 15608157, 15608474, 15608437, 15608435, 15608386, 15608769, 15610974, 15609863, 15608674, 15610188, 15608530, 15609917, 15607551, 15608741, 15609348, 15609347, 15607148, 15610728, 15609834, 15608974, 15608833, 15609357, 15610553, 15607330, 15607475, 57117031, 15610384, 15610123, 15609675, 15608749, 15608794, 57116972, 15610528                                                                                                                                                                                                                                                                                                                                                                                                                                                                                                                                                                                                                                                                                                                                                                                                                                                                                                                                                                                                                                                                                                                                                                                                                                                                                                                                                                                        |
| 43648 | dicarboxylic acid metabolic process                                                   | BiologicalProcess | 2.64E-03 | 3.74E-02 | 10  | 19  | 531 | 2477 | 15609675, 15609890, 15608749, 15610974, 15610363, 15609863, 15609910, 15608741, 161352467, 15609635                                                                                                                                                                                                                                                                                                                                                                                                                                                                                                                                                                                                                                                                                                                                                                                                                                                                                                                                                                                                                                                                                                                                                                                                                                                                                                                                                                                                                                                                                                                                                                                                                                                                                                                                                                                                                   |
| 44036 | cell wall macromolecule metabolic process                                             | BiologicalProcess | 2.74E-03 | 3.79E-02 | 12  | 25  | 531 | 2477 | 15610936, 15607782, 15607644, 15608621, 15607784, 15607776, 15608622, 15610926, 15610927, 15608114, 15610528, 57116735                                                                                                                                                                                                                                                                                                                                                                                                                                                                                                                                                                                                                                                                                                                                                                                                                                                                                                                                                                                                                                                                                                                                                                                                                                                                                                                                                                                                                                                                                                                                                                                                                                                                                                                                                                                                |
| 15980 | energy derivation by oxidation of organic compounds                                   | BiologicalProcess | 2.94E-03 | 3.93E-02 | 7   | 11  | 531 | 2477 | 15610475, 15609591, 15608380, 57116903, 161352467, 57116704, 15607208                                                                                                                                                                                                                                                                                                                                                                                                                                                                                                                                                                                                                                                                                                                                                                                                                                                                                                                                                                                                                                                                                                                                                                                                                                                                                                                                                                                                                                                                                                                                                                                                                                                                                                                                                                                                                                                 |
| 46128 | purine ribonucleoside metabolic process                                               | BiologicalProcess | 2.94E-03 | 3.93E-02 | 7   | 11  | 531 | 2477 | 15607644, 15608769, 15608974, 15610384, 15610102, 15608530, 15610528                                                                                                                                                                                                                                                                                                                                                                                                                                                                                                                                                                                                                                                                                                                                                                                                                                                                                                                                                                                                                                                                                                                                                                                                                                                                                                                                                                                                                                                                                                                                                                                                                                                                                                                                                                                                                                                  |
| 42278 | purine nucleoside metabolic process                                                   | BiologicalProcess | 2.94E-03 | 3.93E-02 | 7   | 11  | 531 | 2477 | 15607644, 15608769, 15608974, 15610384, 15610102, 15608530, 15610528                                                                                                                                                                                                                                                                                                                                                                                                                                                                                                                                                                                                                                                                                                                                                                                                                                                                                                                                                                                                                                                                                                                                                                                                                                                                                                                                                                                                                                                                                                                                                                                                                                                                                                                                                                                                                                                  |
| 6631  | fatty acid metabolic process                                                          | BiologicalProcess | 3.40E-03 | 4.49E-02 | 18  | 45  | 531 | 2477 | 15610936, 15608621, 15607644, 15608622, 15607382, 15607383, 15608114, 15609322, 15610961, 15610072, 57116735, 15610525, 15607782, 15609382, 15607784, 15607776, 15610528, 15607609                                                                                                                                                                                                                                                                                                                                                                                                                                                                                                                                                                                                                                                                                                                                                                                                                                                                                                                                                                                                                                                                                                                                                                                                                                                                                                                                                                                                                                                                                                                                                                                                                                                                                                                                    |
| 3674  | molecular_function                                                                    | MolecularFunction | 2.57E-05 | 7.02E-04 | 181 | 668 | 531 | 2477 | 15610945, 15609910, 15609324, 15608283, 15609322, 57117044, 15609848, 57117042, 57116734, 15610226, 15610225, 15609521, 15607873, 15608086, 15610936, 57117051, 15608154, 15608734, 15610363, 15610733, 15610937, 15607688, 15610736, 15610937, 15607688, 15610736, 15610870, 15608295, 345462027, 15609315, 15608474, 15608157, 15608158, 15607208, 15609863, 15608674, 15609917, 15610546, 15608530, 15610359, 15609639, 15610764, 15608486, 15609591, 15607551, 15607196, 15607382, 57117131, 15607383, 15610019, 15609348, 15608112, 15609347, 57116956, 161352467, 15609834, 15608974, 15609296, 15608833, 15610553, 15607548, 15611017, 15610554, 57117031, 15609339, 15608958, 15608613, 15609528, 15609139, 57117125, 15609840, 15608794, 448824735, 15608964, 15608071, 15609632, 15609635, 15609743, 57116993, 15609890, 15608621, 57116990, 15609168, 15608622, 15607840, 15607364, 15609069, 57117081, 15610782, 448824754, 448824753, 15608424, 15609422, 15610982, 15610705, 15608234, 15610704, 15610706, 15609234, 15607776, 15610985, 15607573, 15610269, 15609566, 15609565, 15610988, 57116987, 15608399, 57116704, 15608379, 15608043, 15607644, 15609613, 15608576, 15607641, 15608219, 15608776, 15610102, 15609760, 15608435, 15608386, 15609249, 15607782, 15609381, 15609382, 15607825, 15608980, 15607784, 15609204, 15610974, 15608769, 15609246, 15608380, 15607581, 15607586, 15608050, 15610188, 15607151, 15609045, 15607900, 15610416, 15610417, 15607148, 15609258, 15610728, 15609352, 15610056, 15610121, 15607504, 15609359, 15607603, 15609357, 15607609, 15610421, 15607330, 15607913, 15607475, 15610475, 15607998, 57116903, 15610384, 15610077, 15610123, 448824785, 15610072, 15609675, 15610995, 15610525, 15609674, 15609677, 15608749, 15610717, 15610132, 448824781, 15608341, 15610814, 15609220, 15607279, 57116972, 15611050, 15607616, 15610812, 15609670, 15610528 |
| 3824  | catalytic activity                                                                    | MolecularFunction | 1.08E-05 | 3.32E-04 | 134 | 461 | 531 | 2477 | 15610945, 15609910, 15608283, 15609324, 15609322, 57117044, 57116734, 57117042, 15610226, 15610225, 15609521, 15607873, 15608086, 15610936, 15608154, 15608734, 15610363, 15610937, 15607688, 15610736, 15610870, 345462027, 15609315, 15608474, 15608157, 15608158, 15607208, 15609863, 15608674, 15609917, 15610546, 15608530, 15609639, 15610764, 15608486, 15609591, 15607551, 15607382, 57117131, 15607383, 15608112, 15609347, 161352467, 15609834, 15608974, 15608833, 15607548, 57117031, 15608958, 15608613, 15609528, 15609139, 57117125, 15608794, 448824735, 15608071, 15609632, 15609743, 57116993, 15609890, 15608621, 57116990, 15608622, 15609069, 57117081, 15610782, 448824754, 448824753, 15608424, 15609422, 15610982, 15610705, 15610704, 15610706, 15609234, 15607776, 15607573, 15609566, 15609565, 57116987, 57116704, 15608399, 15607641, 15608219, 15610102, 15608435, 15609249, 15608386, 15607782, 15608980, 15609382, 15609204, 15610974, 15608769, 15608380, 15608050, 15610188, 15607151, 15609045, 15610416, 15610417, 15607148, 15609352, 15610121, 15607504, 15609359, 15607603, 15609357, 15607609, 15607913, 15607330, 15610421, 15610475, 15607475, 15610384, 57116903, 15610077, 448824785, 15610072, 15609675, 15610525, 15609674, 15609677, 15610717, 15608749, 15610132, 448824781, 15608341, 57116972, 15607279, 15611050, 15610528                                                                                                                                                                                                                                                                                                                                                                                                                                                                                                                                         |
| 5488  | binding                                                                               | MolecularFunction | 7.25E-05 | 1.74E-03 | 118 | 410 | 531 | 2477 | 15609910, 15608283, 57117044, 15609848, 15610226, 15607873, 15610936, 57117051, 15610733, 345462027, 15608295, 15608157, 15608474, 15609315, 15608158, 15607208, 15610359, 15610764, 15609591, 15607551, 57117131, 15607383, 15608112, 15609347, 161352467, 15609834, 15608974, 15608833, 15607548, 57117031, 15608958, 15608613, 15609528, 15609139, 57117125, 15608794, 448824735, 15608071, 15609632, 15609743, 57116993, 15609890, 15608621, 57116990, 15608622, 15609069, 57117081, 15610782, 448824754, 448824753, 15608424, 15609422, 15610982, 15610705, 15610704, 15610706, 15609234, 15607776, 15607573, 15609566, 15609565, 57116987, 57116704, 15608399, 15607641, 15608219, 15610102, 15608435, 15609249, 15608386, 15607782, 15608980, 15609382, 15609204, 15610974, 15608769, 15608380, 15608050, 15610188, 15607151, 15609045, 15610416, 15610417, 15607148, 15609352, 15610121, 15607504, 15609359, 15607603, 15609357, 15607609, 15607913, 15607330, 15610421, 15610475, 15607475, 15610384, 57116903, 15610077, 448824785, 15610123, 15609675, 15610995, 15609677, 15608749, 15610132, 448824781, 15608341, 57116972, 15609220, 15610814, 15610812, 15607616, 15609670                                                                                                                                                                                                                                                                                                                                                                                                                                                                                                                                                                                                                                                                                                                             |
| 16491 | oxidoreductase activity                                                               | MolecularFunction | 8.15E-07 | 4.45E-05 | 39  | 88  | 531 | 2477 | 15609045, 15608621, 15608486, 15609591, 15608622, 15609910, 15607383, 15609069, 15608112, 161352467, 57117042, 15610982, 15609352, 15610704, 15610706, 15607573, 15609566, 15609565, 15607603, 57116704, 15607609, 15607548, 15610475, 15607641, 57116903, 15609528, 15609139, 15607208, 15609677, 15608980, 15610132, 448824781, 15608380, 15607279, 15609632, 15611050, 15610188, 15609917, 15610546                                                                                                                                                                                                                                                                                                                                                                                                                                                                                                                                                                                                                                                                                                                                                                                                                                                                                                                                                                                                                                                                                                                                                                                                                                                                                                                                                                                                                                                                                                                |
| 16614 | oxidoreductase activity, acting on CH-OH group of donors                              | MolecularFunction | 4.35E-05 | 1.09E-03 | 12  | 18  | 531 | 2477 | 15608621, 15610475, 15608980, 15610132, 15608380, 15607383, 15610546, 15609139, 15607609, 57117042, 15607548, 15607208                                                                                                                                                                                                                                                                                                                                                                                                                                                                                                                                                                                                                                                                                                                                                                                                                                                                                                                                                                                                                                                                                                                                                                                                                                                                                                                                                                                                                                                                                                                                                                                                                                                                                                                                                                                                |
| 16616 | oxidoreductase activity, acting on the CH-OH group of donors, NAD or NADP as acceptor | MolecularFunction | 1.39E-04 | 2.93E-03 | 11  | 17  | 531 | 2477 | 15608621, 15610475, 15608980, 15610132, 15608380, 15607383, 15610546, 15609139, 15607609, 57117042, 15607208                                                                                                                                                                                                                                                                                                                                                                                                                                                                                                                                                                                                                                                                                                                                                                                                                                                                                                                                                                                                                                                                                                                                                                                                                                                                                                                                                                                                                                                                                                                                                                                                                                                                                                                                                                                                          |

|       |                                                                        |                   |          |          |     |      |     |      |                                                                                                                                                                                                                                                                                                                                                                                                                                                                                                                                                                                                                                                                                                                                                                                                                                                                                                                                                                                                                                                                                                                                                                                                                                                                                                                                                                                                                                                                                                                                                                                                                                                                                                                                                                                                                                                                                                                                                                                                                                                                                                                                                                                                                                                                                                                                                                                                                                                                                                                                                                                                                                                                                                                                                                                                                                                                                                                                                                                                                                                                                                                                                                                                                                                                                                                                                                                                                                                                                                                                                                                                                                                                                                                                                                                                                                                                                                                                                                                                                                                                                                                                                                                                                                                                                                                                                                                                                                                                                                                                                                                                                                                                                                                                                                |
|-------|------------------------------------------------------------------------|-------------------|----------|----------|-----|------|-----|------|----------------------------------------------------------------------------------------------------------------------------------------------------------------------------------------------------------------------------------------------------------------------------------------------------------------------------------------------------------------------------------------------------------------------------------------------------------------------------------------------------------------------------------------------------------------------------------------------------------------------------------------------------------------------------------------------------------------------------------------------------------------------------------------------------------------------------------------------------------------------------------------------------------------------------------------------------------------------------------------------------------------------------------------------------------------------------------------------------------------------------------------------------------------------------------------------------------------------------------------------------------------------------------------------------------------------------------------------------------------------------------------------------------------------------------------------------------------------------------------------------------------------------------------------------------------------------------------------------------------------------------------------------------------------------------------------------------------------------------------------------------------------------------------------------------------------------------------------------------------------------------------------------------------------------------------------------------------------------------------------------------------------------------------------------------------------------------------------------------------------------------------------------------------------------------------------------------------------------------------------------------------------------------------------------------------------------------------------------------------------------------------------------------------------------------------------------------------------------------------------------------------------------------------------------------------------------------------------------------------------------------------------------------------------------------------------------------------------------------------------------------------------------------------------------------------------------------------------------------------------------------------------------------------------------------------------------------------------------------------------------------------------------------------------------------------------------------------------------------------------------------------------------------------------------------------------------------------------------------------------------------------------------------------------------------------------------------------------------------------------------------------------------------------------------------------------------------------------------------------------------------------------------------------------------------------------------------------------------------------------------------------------------------------------------------------------------------------------------------------------------------------------------------------------------------------------------------------------------------------------------------------------------------------------------------------------------------------------------------------------------------------------------------------------------------------------------------------------------------------------------------------------------------------------------------------------------------------------------------------------------------------------------------------------------------------------------------------------------------------------------------------------------------------------------------------------------------------------------------------------------------------------------------------------------------------------------------------------------------------------------------------------------------------------------------------------------------------------------------------------------------------|
| 16829 | lyase activity                                                         | MolecularFunction | 1.15E-04 | 2.67E-03 | 23  | 51   | 531 | 2477 | 15607330, 15609890, 15607382, 15607688, 15608219, 15608613, 15609347, 161352467, 15608424, 57116734, 15608435, 15609675, 15610525, 15609674, 15609677, 15608749, 15610717, 15610974, 15607776, 15607504, 57116972, 15608530, 15609743                                                                                                                                                                                                                                                                                                                                                                                                                                                                                                                                                                                                                                                                                                                                                                                                                                                                                                                                                                                                                                                                                                                                                                                                                                                                                                                                                                                                                                                                                                                                                                                                                                                                                                                                                                                                                                                                                                                                                                                                                                                                                                                                                                                                                                                                                                                                                                                                                                                                                                                                                                                                                                                                                                                                                                                                                                                                                                                                                                                                                                                                                                                                                                                                                                                                                                                                                                                                                                                                                                                                                                                                                                                                                                                                                                                                                                                                                                                                                                                                                                                                                                                                                                                                                                                                                                                                                                                                                                                                                                                          |
| 16835 | carbon-oxygen lyase activity                                           | MolecularFunction | 4.17E-04 | 7.96E-03 | 13  | 24   | 531 | 2477 | 15607330, 15609890, 15607382, 15608613, 15608424, 15608435, 15610525, 15609675, 15609674, 15609677, 15610974, 15607776, 57116972                                                                                                                                                                                                                                                                                                                                                                                                                                                                                                                                                                                                                                                                                                                                                                                                                                                                                                                                                                                                                                                                                                                                                                                                                                                                                                                                                                                                                                                                                                                                                                                                                                                                                                                                                                                                                                                                                                                                                                                                                                                                                                                                                                                                                                                                                                                                                                                                                                                                                                                                                                                                                                                                                                                                                                                                                                                                                                                                                                                                                                                                                                                                                                                                                                                                                                                                                                                                                                                                                                                                                                                                                                                                                                                                                                                                                                                                                                                                                                                                                                                                                                                                                                                                                                                                                                                                                                                                                                                                                                                                                                                                                               |
| 16903 | oxidoreductase activity, acting on the aldehyde or oxo group of donors | MolecularFunction | 9.23E-04 | 1.66E-02 | 8   | 12   | 531 | 2477 | 15609352, 15609591, 448824781, 57116903, 15609632, 15607603, 161352467, 57116704                                                                                                                                                                                                                                                                                                                                                                                                                                                                                                                                                                                                                                                                                                                                                                                                                                                                                                                                                                                                                                                                                                                                                                                                                                                                                                                                                                                                                                                                                                                                                                                                                                                                                                                                                                                                                                                                                                                                                                                                                                                                                                                                                                                                                                                                                                                                                                                                                                                                                                                                                                                                                                                                                                                                                                                                                                                                                                                                                                                                                                                                                                                                                                                                                                                                                                                                                                                                                                                                                                                                                                                                                                                                                                                                                                                                                                                                                                                                                                                                                                                                                                                                                                                                                                                                                                                                                                                                                                                                                                                                                                                                                                                                               |
| 42802 | identical protein binding                                              | MolecularFunction | 1.78E-04 | 3.62E-03 | 38  | 103  | 531 | 2477 | 15609045, 15607900, 57116993, 15608621, 57117131, 15608283, 15609069, 448824753, 15609347, 15608424, 15609848, 15610982, 15610226, 15609258, 15610705, 15608234, 15608974, 15610121, 15609566, 15610988, 15607603, 15607330, 15610475, 15608576, 15607998, 15609339, 15608295, 345462027, 15608435, 15607208, 15610132, 15610974, 15608071, 15607581, 57116972, 15610812, 15607616, 15609670                                                                                                                                                                                                                                                                                                                                                                                                                                                                                                                                                                                                                                                                                                                                                                                                                                                                                                                                                                                                                                                                                                                                                                                                                                                                                                                                                                                                                                                                                                                                                                                                                                                                                                                                                                                                                                                                                                                                                                                                                                                                                                                                                                                                                                                                                                                                                                                                                                                                                                                                                                                                                                                                                                                                                                                                                                                                                                                                                                                                                                                                                                                                                                                                                                                                                                                                                                                                                                                                                                                                                                                                                                                                                                                                                                                                                                                                                                                                                                                                                                                                                                                                                                                                                                                                                                                                                                   |
| 42803 | protein homodimerization activity                                      | MolecularFunction | 1.78E-04 | 3.62E-03 | 38  | 103  | 531 | 2477 | 15609045, 15607900, 57116993, 15608621, 57117131, 15608283, 15609069, 448824753, 15609347, 15608424, 15609848, 15610982, 15610226, 15609258, 15610705, 15608234, 15608974, 15610121, 15609566, 15610988, 15607603, 15607330, 15610475, 15608576, 15607998, 15609339, 15608295, 345462027, 15608435, 15607208, 15610132, 15610974, 15608071, 15607581, 57116972, 15610812, 15607616, 15609670                                                                                                                                                                                                                                                                                                                                                                                                                                                                                                                                                                                                                                                                                                                                                                                                                                                                                                                                                                                                                                                                                                                                                                                                                                                                                                                                                                                                                                                                                                                                                                                                                                                                                                                                                                                                                                                                                                                                                                                                                                                                                                                                                                                                                                                                                                                                                                                                                                                                                                                                                                                                                                                                                                                                                                                                                                                                                                                                                                                                                                                                                                                                                                                                                                                                                                                                                                                                                                                                                                                                                                                                                                                                                                                                                                                                                                                                                                                                                                                                                                                                                                                                                                                                                                                                                                                                                                   |
| 43167 | ion binding                                                            | MolecularFunction | 2.74E-03 | 3.79E-02 | 41  | 128  | 531 | 2477 | 15609045, 15610764, 15609591, 15610782, 57117044, 161352467, 15608424, 15609848, 15610982, 15609258, 15607148, 15610728, 15608234, 15610704, 15609834, 15608974, 15610121, 15607504, 15607573, 15609357, 15608379, 15608043, 15610554, 15610475, 15607641, 57117031, 448824785, 345462027, 15609315, 15608474, 15608157, 15608158, 15607208, 15609675, 448824735, 15608749, 15608071, 448824781, 15608341, 15609220, 15609635                                                                                                                                                                                                                                                                                                                                                                                                                                                                                                                                                                                                                                                                                                                                                                                                                                                                                                                                                                                                                                                                                                                                                                                                                                                                                                                                                                                                                                                                                                                                                                                                                                                                                                                                                                                                                                                                                                                                                                                                                                                                                                                                                                                                                                                                                                                                                                                                                                                                                                                                                                                                                                                                                                                                                                                                                                                                                                                                                                                                                                                                                                                                                                                                                                                                                                                                                                                                                                                                                                                                                                                                                                                                                                                                                                                                                                                                                                                                                                                                                                                                                                                                                                                                                                                                                                                                  |
| 43169 | cation binding                                                         | MolecularFunction | 2.32E-03 | 3.43E-02 | 41  | 127  | 531 | 2477 | 15609045, 15610764, 15609591, 15610782, 57117044, 161352467, 15608424, 15609848, 15610982, 15609258, 15607148, 15610728, 15608234, 15610704, 15609834, 15608974, 15610121, 15607504, 15607573, 15609357, 15608379, 15608043, 15610554, 15610475, 15607641, 57117031, 448824785, 345462027, 15609315, 15608474, 15608157, 15608158, 15607208, 15609675, 448824735, 15608749, 15608071, 448824781, 15608341, 15609220, 15609635                                                                                                                                                                                                                                                                                                                                                                                                                                                                                                                                                                                                                                                                                                                                                                                                                                                                                                                                                                                                                                                                                                                                                                                                                                                                                                                                                                                                                                                                                                                                                                                                                                                                                                                                                                                                                                                                                                                                                                                                                                                                                                                                                                                                                                                                                                                                                                                                                                                                                                                                                                                                                                                                                                                                                                                                                                                                                                                                                                                                                                                                                                                                                                                                                                                                                                                                                                                                                                                                                                                                                                                                                                                                                                                                                                                                                                                                                                                                                                                                                                                                                                                                                                                                                                                                                                                                  |
| 46872 | metal ion binding                                                      | MolecularFunction | 2.32E-03 | 3.43E-02 | 41  | 127  | 531 | 2477 | 15609045, 15610764, 15609591, 15610782, 57117044, 161352467, 15608424, 15609848, 15610982, 15609258, 15607148, 15610728, 15608234, 15610704, 15609834, 15608974, 15610121, 15607504, 15607573, 15609357, 15608379, 15608043, 15610554, 15610475, 15607641, 57117031, 448824785, 345462027, 15609315, 15608474, 15608157, 15608158, 15607208, 15609675, 448824735, 15608749, 15608071, 448824781, 15608341, 15609220, 15609635                                                                                                                                                                                                                                                                                                                                                                                                                                                                                                                                                                                                                                                                                                                                                                                                                                                                                                                                                                                                                                                                                                                                                                                                                                                                                                                                                                                                                                                                                                                                                                                                                                                                                                                                                                                                                                                                                                                                                                                                                                                                                                                                                                                                                                                                                                                                                                                                                                                                                                                                                                                                                                                                                                                                                                                                                                                                                                                                                                                                                                                                                                                                                                                                                                                                                                                                                                                                                                                                                                                                                                                                                                                                                                                                                                                                                                                                                                                                                                                                                                                                                                                                                                                                                                                                                                                                  |
| 46983 | protein dimerization activity                                          | MolecularFunction | 5.16E-05 | 1.27E-03 | 40  | 105  | 531 | 2477 | 15609045, 15607900, 57116993, 15608621, 57117131, 15608283, 15609069, 15609347, 448824753, 15608424, 15609848, 15610982, 15610226, 15609258, 15607148, 15610705, 15608234, 15608974, 15610121, 15609566, 15610988, 15607603, 15607330, 15610475, 15608576, 15607998, 15609339, 15608295, 345462027, 15608435, 15607208, 448824735, 15610132, 15610974, 15608071, 15607581, 57116972, 15610812, 15607616, 15609670                                                                                                                                                                                                                                                                                                                                                                                                                                                                                                                                                                                                                                                                                                                                                                                                                                                                                                                                                                                                                                                                                                                                                                                                                                                                                                                                                                                                                                                                                                                                                                                                                                                                                                                                                                                                                                                                                                                                                                                                                                                                                                                                                                                                                                                                                                                                                                                                                                                                                                                                                                                                                                                                                                                                                                                                                                                                                                                                                                                                                                                                                                                                                                                                                                                                                                                                                                                                                                                                                                                                                                                                                                                                                                                                                                                                                                                                                                                                                                                                                                                                                                                                                                                                                                                                                                                                              |
| 48037 | cofactor binding                                                       | MolecularFunction | 1.07E-03 | 1.90E-02 | 16  | 35   | 531 | 2477 | 15609045, 15608622, 15609910, 15607364, 15610384, 448824753, 15608295, 57116956, 57117044, 15608435, 15609677, 15609352, 15608341, 57116972, 15607603, 15607548                                                                                                                                                                                                                                                                                                                                                                                                                                                                                                                                                                                                                                                                                                                                                                                                                                                                                                                                                                                                                                                                                                                                                                                                                                                                                                                                                                                                                                                                                                                                                                                                                                                                                                                                                                                                                                                                                                                                                                                                                                                                                                                                                                                                                                                                                                                                                                                                                                                                                                                                                                                                                                                                                                                                                                                                                                                                                                                                                                                                                                                                                                                                                                                                                                                                                                                                                                                                                                                                                                                                                                                                                                                                                                                                                                                                                                                                                                                                                                                                                                                                                                                                                                                                                                                                                                                                                                                                                                                                                                                                                                                                |
| 51287 | NAD or NADH binding                                                    | MolecularFunction | 4.82E-04 | 9.06E-03 | 7   | 9    | 531 | 2477 | 15609045, 15609677, 15609910, 15608622, 15610384, 15607364, 15607603                                                                                                                                                                                                                                                                                                                                                                                                                                                                                                                                                                                                                                                                                                                                                                                                                                                                                                                                                                                                                                                                                                                                                                                                                                                                                                                                                                                                                                                                                                                                                                                                                                                                                                                                                                                                                                                                                                                                                                                                                                                                                                                                                                                                                                                                                                                                                                                                                                                                                                                                                                                                                                                                                                                                                                                                                                                                                                                                                                                                                                                                                                                                                                                                                                                                                                                                                                                                                                                                                                                                                                                                                                                                                                                                                                                                                                                                                                                                                                                                                                                                                                                                                                                                                                                                                                                                                                                                                                                                                                                                                                                                                                                                                           |
| 70404 | NADH binding                                                           | MolecularFunction | 2.09E-03 | 3.19E-02 | 4   | 4    | 531 | 2477 | 15609045, 15609910, 15607364, 15607603                                                                                                                                                                                                                                                                                                                                                                                                                                                                                                                                                                                                                                                                                                                                                                                                                                                                                                                                                                                                                                                                                                                                                                                                                                                                                                                                                                                                                                                                                                                                                                                                                                                                                                                                                                                                                                                                                                                                                                                                                                                                                                                                                                                                                                                                                                                                                                                                                                                                                                                                                                                                                                                                                                                                                                                                                                                                                                                                                                                                                                                                                                                                                                                                                                                                                                                                                                                                                                                                                                                                                                                                                                                                                                                                                                                                                                                                                                                                                                                                                                                                                                                                                                                                                                                                                                                                                                                                                                                                                                                                                                                                                                                                                                                         |
| 5575  | cellular_component                                                     | CellularComponent | 4.11E-14 | 4.12E-12 | 459 | 1849 | 531 | 2477 | 448824799, 448824796, 15607925, 15607223, 448824790, 15607492, 15607491, 15607938, 15607208, 15607940, 15609282, 15609591, 15609592, 15607388, 15607389, 57117131, 15607382, 15607383, 15607384, 15607385, 15607949, 15609599, 15609494, 57117128, 15607951, 15609296, 15611016, 15609395, 15611017, 15607372, 15607955, 57117125, 15607230, 15607362, 15607364, 448824754, 448824753, 57117015, 15609234, 15607269, 15607456, 15607352, 448824769, 448824762, 448824761, 15607357, 15609249, 15609381, 15608385, 15609382, 15609204, 15609246, 15608380, 15607151, 15607488, 15607148, 15609258, 15609352, 15607144, 15609350, 15609211, 15609359, 15609357, 15607330, 15607475, 448824785, 15607473, 15609229, 448824781, 15607273, 15608284, 15610226, 15607321, 15610223, 15608086, 15608154, 15608155, 15608837, 15610363, 15610360, 15607407, 15608157, 15608091, 15608092, 15610212, 15608097, 15607412, 15610359, 15607411, 15608163, 15608969, 15608262, 15608067, 15608974, 15608273, 15608958, 15610242, 15608964, 15608071, 15608966, 15610236, 15608821, 15610336, 57116993, 15610275, 57116990, 15607840, 15607844, 15607842, 15607841, 57116800, 15610269, 15610472, 57116704, 15608045, 15608992, 15608043, 15610454, 15610595, 15607823, 15608980, 15607825, 57116856, 15608889, 57116810, 57116994, 15607720, 15610391, 57116820, 15608876, 15610593, 15608029, 15610594, 15608024, 15610492, 15607717, 15610475, 15607711, 15610384, 15610579, 15610578, 15610382, 15607807, 57116832, 15607808, 15608036, 57116972, 15610276, 15611050, 15607706, 15610945, 15607530, 15610139, 57116739, 15608519, 15610038, 57116734, 57116735, 15610537, 15610805, 15610041, 15607873, 15610803, 15610532, 15608520, 15610936, 57116727, 15608734, 15610147, 15608527, 15610146, 15608731, 15610406, 15610405, 15610937, 15609191, 15607688, 15610046, 345462027, 15608318, 57116724, 15609198, 15608321, 15608530, 15610546, 15608531, 15607744, 15608111, 15607551, 15608013, 15607847, 15607846, 15610019, 15607651, 15608112, 15607845, 161352467, 15610961, 15608405, 15608313, 15608210, , 15607854, 15610655, 15608401, 15607855, 15610656, 15608214, 15610553, 15608211, 15607548, 15610554, 15610165, 15607549, 15610572, 15610166, 15607564, 15607856, 57116747, 15607859, 15610027, 15608000, 15608613, 15610950, 15610026, 15610032, 15607863, 15607864, 15608605, 15609890, 15609751, 15608621, 57116779, 15608622, 15608767, 15608768, 15608765, 15610438, 15608900, 57116682, 15610705, 15608234, 15607772, 15608372, 15607771, 15610706, 15608238, 15607776, 15608379, 15607644, 15608630, 15609614, 15608631, 15609613, 57116768, 15610005, 15607641, 15610106, 15608219, 15607779, 15608776, 15610104, 15608779, 15609761, 15610305, 15609760, 15608774, 15607782, 15607784, 15607787, 15608769, 15608908, 15608626, 15610835, 15607781, 15607780, 15610410, 15610412, 15609603, 15610926, 15610416, 15610927, 15610417, 15610419, 15610728, 15607795, 15607506, 15610121, 15607504, 15607792, 15607791, 15607893, 15607603, 15607609, 15610421, 15610910, 57116786, 57116903, 15610123, 15607525, 15610913, 15608755, 15610525, 15608749, 15608341, 15610812, 15607616, 15610528, 15608464, 15608659, 15609706, 15608468, 15609910, 15609709, 15609324, 15609322, 57117044, 57117042, 15609848, 57117041, 15608463, 15609661, 15609319, 15609850, 15609665, 57117051, 15609920, 15610733, 15609922, 15609451, 15610736, 15609117, 15610870, 15607186, 15609315, 15609013, 15609115, 15609510, 15609863, 15608674, 15609658, 15609659, 15609917, 15609009, 15610764, 15609639, 15609638, 15608581, 15609006, 15609727, 15609726, 15609142, 15607196, 15610862, 15607195, 15608586, 15607198, 15608587, 15609347, 15608480, 57117019, 15609549, 57117016, 15609546, 15608682, 15609542, 15609541, 15609926, 15609332, 15609436, 15608592, 15609133, 15609337, 15609339, 15610852, 15609139, 15609333, 15609528, 57117036, 15609840, 448824735, 15609632, 15608792, 15608697, 15608696, 15609743, 15610187, 15610182, 15609168, 15609169, 15609167, 15610784, 15609069, 57117081, 57117137, 15610782, 15610088, 15608424, 15610982, 15610986, 57117147, 15610985, 15607573, 15609813, 15609566, 15609565, 15610988, 15610198, 15608576, 15609056, 15608575, 15608574, 15610090, 15607971, 15608432, 15609417, 15608437, 15608435, 15607580, 15607581, 15607586, 448824818, 15609692, 15610188, 15609045, 15608542, 15609303, 15608447, 15608446, 15610065, 15608449, 15608448, 15609976, 15609585, 15607291, 15607290, 57117168, 15609581, 15607999, 15607297, 15610056, 15607296, 15607691, 15607598, 15608451, 15608450, 15610897, 15607998, 15610077, 15607994, 15609982, 15609038, 15610072, 15609675, 15610995, 15610994, 15609579 |
| 5618  | cell wall                                                              | CellularComponent | 1.04E-22 | 2.51E-20 | 252 | 737  | 531 | 2477 | 15610945, 15610139, 15608519, 15607873, 15610803, 15610532, 448824790, 15608520, 15610936, 57116727, 15607492, 15608734, 15610147, 15608527, 15607491, 15608731, 15610405, 15610937, 15607938, 57116724, 15607208, 15609198, 15608321, 15609282, 15608531, 15609591, 15609592, 15607388, 15608013, 15607389, 57117131, 15607847, 15607383, 15607384, 15610019, 15607846, 15609599, 161352467, 15610961, 15608405, 15608210, 15608401, 15607855, 15610656, 15611016, 15609395, 15608214, 15610553, 15607548, 15610554, 15610165, 15610166, 15607859, 15607955, 15610027, 15608000, 15608613, 15610026, 15607864, 15608605, 15607230, 15608622, 15608767, 15608768, 15608765, 448824753, 15610705, 15608234, 15607771, 57117015, 15609234, 15608238, 15607776, 15608630, 15609614, 15609613, 15607352, 57116768, 448824769, 15610005, 15610106, 15607779, 15608776, 15610104, 448824762, 15609760, 15608774, 15608385, 15609381, 15607782, 15609382, 15607784, 15607787, 15608380, 15608626, 15607151, 15610835, 15607781, 15607780, 15607488, 15610410, 15609603, 15610416, 15610417, 15610419, 15607148, 15609258, 15610728, 15607144, 15607795, 15607504, 15607792, 15607791, 15609357, 15607609, 15610421, 15607475, 57116786, 15610123, 15607525, 15610525, 15608749, 448824781, 15608341, 15610812, 15607616, 15608464, 15609910, 15609709, 15609322, 57117044, 15608284, 57117042, 15609848, 15610226, 15609661, 15609319, 15607321, 15609850, 15610223, 15609665, 15609920, 15610360, 15610733, 15609451, 15609117, 15608157, 15608091, 15608092, 15609510, 15610212, 15607412, 15608674, 15609917, 15610359, 15607411, 15609009, 15608163, 15609142, 15608969, 15607195, 15607198, 15608587, 15609347, 57117019, 15608682, 15608788, 15608974, 15609541, 15609926, 15609433, 15609435, 15609436, 15608592, 15609133, 15608273, 15609339, 15608958, 15609528, 15609333, 15610242, 57117036, 15609840, 448824735, 15608964, 15608071, 15608966, 15610236, 15609632, 15608792, 15608696, 15610187, 15610275, 57116990, 15610182, 15609168, 15609169, 15607840, 15609167, 15610784, 15609069, 15610782, 15610985, 15607573, 15610269, 15609565, 15610988, 15608045, 15610198, 15609056, 15608574, 15610090, 15607971, 15609417, 15608437, 15607823, 15607825, 15607581, 15607586, 448824818, 15609692, 15609045, 15609303, 15607290, 15608447, 15608446, 15608449, 15608448, 15609976, 15609585, 15607290, 57117168, 57116820, 15610593, 15610594, 15609581, 15607999, 15608451, 15608450, 15607711, 15607998, 15610384, 15610579, 15610077, 15607994, 15609982, 15610072, 15609675, 15607807, 15607808, 15610276, 15611050                                                                                                                                                                                                                                                                                                                                                                                                                                                                                                                                                                                                                                                                                                                                                                                                                                                                                                                                                                                                                                                                                                                                                                                                                                                                                                                                                                                                                                                                                                                                                                                                                                                                                                                                                                                                                                                                                                                                                                                                                                                                                                                                 |

|      |                 |                   |          |          |     |      |     |      |                                                                                                                                                                                                                                                                                                                                                                                                                                                                                                                                                                                                                                                                                                                                                                                                                                                                                                                                                                                                                                                                                                                                                                                                                                                                                                                                                                                                                                                                                                                                                                                                                                                                                                                                                                                                                                                                                                                                                                                                                                                                                                                                                                                                                                                                                                                                                                                                                                                                                                                                                                                                                                                                                                                                                                                                                                                                                                                                                                                                                                                                                                                                                                                                                                                                                                                                                                                                                                                                                                                                                                                                                                                                                                                                                                                                                                                                                                                                                                                                                                                                                                                                                                                                                                                                                                                                                                                                                                                                                                                                                                                                           |
|------|-----------------|-------------------|----------|----------|-----|------|-----|------|-----------------------------------------------------------------------------------------------------------------------------------------------------------------------------------------------------------------------------------------------------------------------------------------------------------------------------------------------------------------------------------------------------------------------------------------------------------------------------------------------------------------------------------------------------------------------------------------------------------------------------------------------------------------------------------------------------------------------------------------------------------------------------------------------------------------------------------------------------------------------------------------------------------------------------------------------------------------------------------------------------------------------------------------------------------------------------------------------------------------------------------------------------------------------------------------------------------------------------------------------------------------------------------------------------------------------------------------------------------------------------------------------------------------------------------------------------------------------------------------------------------------------------------------------------------------------------------------------------------------------------------------------------------------------------------------------------------------------------------------------------------------------------------------------------------------------------------------------------------------------------------------------------------------------------------------------------------------------------------------------------------------------------------------------------------------------------------------------------------------------------------------------------------------------------------------------------------------------------------------------------------------------------------------------------------------------------------------------------------------------------------------------------------------------------------------------------------------------------------------------------------------------------------------------------------------------------------------------------------------------------------------------------------------------------------------------------------------------------------------------------------------------------------------------------------------------------------------------------------------------------------------------------------------------------------------------------------------------------------------------------------------------------------------------------------------------------------------------------------------------------------------------------------------------------------------------------------------------------------------------------------------------------------------------------------------------------------------------------------------------------------------------------------------------------------------------------------------------------------------------------------------------------------------------------------------------------------------------------------------------------------------------------------------------------------------------------------------------------------------------------------------------------------------------------------------------------------------------------------------------------------------------------------------------------------------------------------------------------------------------------------------------------------------------------------------------------------------------------------------------------------------------------------------------------------------------------------------------------------------------------------------------------------------------------------------------------------------------------------------------------------------------------------------------------------------------------------------------------------------------------------------------------------------------------------------------------------------------------------|
| 5622 | intracellular   | CellularComponent | 2.37E-14 | 2.59E-12 | 145 | 397  | 531 | 2477 | 15607530, 448824799, 15608468, 448824796, 57116734, 15609661, 15610226, 15607873, 15609850, 15608520, 15610936, 57117051, 15608155, 15609920, 15607491, 15608527, 15610733, 15610360, 15609191, 15608091, 15608092, 15607208, 15607940, 15609198, 15609658, 15609917, 15608531, 15610764, 15609591, 15609727, 15608013, 15607551, 57117131, 15608586, 15607383, 15608587, 15607198, 15607384, 15609599, 161352467, 15610961, 15609549, 57117128, 15608974, 15609541, 15610553, 15608211, 15610554, 15610165, 15610166, 15607564, 15608273, 15609337, 15607955, 15608000, 15608613, 15610026, 57117036, 15608071, 15610336, 15610182, 15609168, 15609169, 15607840, 15609167, 15608768, 15610782, 448824754, 15610088, 15607842, 15607841, 15610982, 15608234, 15607772, 15608238, 15610985, 15610269, 15607269, 15608043, 15607644, 15608630, 15609614, 15609613, 15607352, 15608576, 15610454, 15608574, 15608776, 15607971, 15608432, 15609760, 15608435, 15607823, 15609249, 15609381, 15608980, 15607825, 15609382, 15607787, 15608769, 15608889, 57116810, 15608380, 15607581, 15609692, 15610188, 15607151, 15607781, 15609045, 15610410, 15610416, 15610417, 15610419, 15610391, 15609585, 15610593, 15608876, 15609352, 15610594, 15608029, 15609581, 15609350, 15607792, 15609211, 15607603, 15609357, 15607609, 15610421, 15608450, 57116786, 15607711, 15610579, 15610384, 15608755, 15610995, 15610525, 15609229, 15607807, 15608036, 448824781, 15610994, 15607273, 15611050, 15607616, 15607706                                                                                                                                                                                                                                                                                                                                                                                                                                                                                                                                                                                                                                                                                                                                                                                                                                                                                                                                                                                                                                                                                                                                                                                                                                                                                                                                                                                                                                                                                                                                                                                                                                                                                                                                                                                                                                                                                                                                                                                                                                                                                                                                                                                                                                                                                                                                                                                                                                                                                                                                                                                                                                                                                                                                                                                                                                                                                                                                                                                                                                                                                             |
| 5623 | cell            | CellularComponent | 2.87E-23 | 8.64E-21 | 452 | 1696 | 531 | 2477 | 448824799, 448824796, 15607925, 15607223, 448824790, 15607492, 15607491, 15607938, 15607208, 15607940, 15609282, 15609591, 15609592, 15607388, 15607389, 57117131, 15607382, 15607383, 15607384, 15607385, 15607949, 15609599, 15609494, 57117128, 15607951, 15611016, 15609395, 15607372, 15607955, 57117125, 15607230, 15607362, 15607364, 448824754, 448824753, 57117015, 15609234, 15607269, 15607352, 448824769, 448824762, 448824761, 15607357, 15609249, 15609381, 15608385, 15609382, 15609204, 15609246, 15608380, 15607151, 15607488, 15607148, 15609258, 15609352, 15607144, 15609350, 15609211, 15609359, 15609357, 15607330, 15607475, 448824785, 15607473, 15609229, 448824781, 15607273, 15608284, 15610226, 15607321, 15610223, 15608086, 15608154, 15608155, 15608837, 15610363, 15610360, 15607407, 15608157, 15608091, 15608092, 15610212, 15608097, 15607412, 15610359, 15607411, 15608163, 15608969, 15608262, 15608067, 15608974, 15608273, 15608958, 15610242, 15608071, 15608964, 15608966, 15610236, 15608821, 15610336, 15610275, 57116990, 15607840, 15607844, 15607842, 15607841, 57116800, 15610269, 15610472, 57116704, 15608045, 15608992, 15608043, 15610454, 15610595, 15607823, 15608890, 15607825, 57116856, 15608889, 57116810, 156116994, 15607720, 15610391, 57116820, 15608876, 15610593, 15608029, 15610594, 15608024, 15610492, 15607717, 15610475, 15607711, 15610384, 15610579, 15610578, 15610382, 15607807, 57116832, 15607808, 15608036, 15610276, 15611050, 15607706, 15610945, 15607530, 15610139, 57116739, 15608519, 15610038, 57116734, 57116735, 15610537, 15610805, 15610041, 15607873, 15610803, 15610532, 15608520, 15610936, 57116727, 15608734, 15610147, 15608527, 15610146, 15608731, 15610406, 15610405, 15610937, 15609191, 15607688, 15610046, 345462027, 15608318, 57116724, 15609198, 15608321, 15608530, 15610546, 15608531, 15607744, 15608111, 15607551, 15608013, 15607847, 15607651, 15607846, 15610019, 15607845, 15608112, 161352467, 15610961, 15608405, 15608313, 15608210, , 15607854, 15610655, 15608401, 15607855, 15610656, 15608214, 15610553, 15608211, 15607548, 15610554, 15610165, 15610572, 15610166, 15607564, 15607856, 57116747, 15607859, 15610027, 15608000, 15608613, 15610950, 15610026, 15610032, 15607863, 15607864, 15608605, 15609890, 15609751, 15608621, 57116779, 15608622, 15608767, 15608768, 15608765, 15610438, 15608900, 57116682, 15610705, 15608234, 15607772, 15608372, 15607771, 15610706, 15608238, 15607776, 15608379, 15607644, 15608630, 15609614, 15608631, 15609613, 57116768, 15610005, 15607641, 15610106, 15608219, 15607779, 15608776, 15610104, 15608779, 15609761, 15610305, 15609760, 15608774, 15607782, 15607784, 15607787, 15608769, 15608908, 15608626, 15610835, 15607781, 15607780, 15610410, 15610412, 15609603, 15610926, 15610416, 15610927, 15610417, 15610419, 15610728, 15607795, 15607506, 15610121, 15607795, 15607791, 15607792, 15607791, 15607893, 15607603, 15607609, 15610421, 15610910, 57116786, 15610913, 15608755, 15610525, 15608749, 15608341, 15610812, 15607616, 15610528, 15608464, 15608659, 15609706, 15608468, 15609910, 15609709, 15609324, 15609322, 57117044, 57117042, 15609848, 57117041, 15608463, 15609661, 15609319, 15609850, 15609665, 57117051, 15609920, 15610733, 15609922, 15609451, 15610736, 15609117, 15610870, 15607186, 15609315, 15609013, 15609115, 15609510, 15609863, 15608674, 15609658, 15609659, 15609917, 15609009, 15610764, 15609639, 15609638, 15608581, 15609006, 15609727, 15609726, 15609142, 15607196, 15610862, 15607195, 15607198, 15608587, 15608480, 57117019, 57117016, 15609546, 15608682, 15608682, 15608788, 15609542, 15609433, 15609332, 15609435, 15609436, 15608592, 15609133, 15609337, 15609339, 15610852, 15609139, 15609333, 57117036, 15609840, 448824735, 15609632, 15608697, 15608792, 15608696, 15609743, 15610182, 15609168, 15609169, 15609167, 57117137, 57117081, 15610782, 15610088, 15608424, 15610982, 15610986, 15610985, 15609813, 15607573, 15609566, 15610988, 15609565, 15608576, 15608575, 15609056, 15610090, 15608574, 15607971, 15608432, 15609417, 15608437, 15608435, 15607580, 15607581, 15607586, 448824818, 15609692, 15610188, 15609045, 15608542, 15609303, 15608447, 15608446, 15610065, 15608449, 15608448, 15609976, 15609585, 15607291, 15607290, 57117168, 15609581, 15607999, 15607297, 15610056, 15607296, 15607691, 15607598, 15608451, 15608450, 15610897, 15607998, 15610077, 15607994, 15609982, 15609038, 15610072, 15609675, 15610995, 15610994, 15609579 |
| 5737 | cytoplasm       | CellularComponent | 6.11E-15 | 9.18E-13 | 144 | 388  | 531 | 2477 | 15607530, 448824799, 15608468, 448824796, 57116734, 15609661, 15610226, 15607873, 15609850, 15608520, 15610936, 57117051, 15608155, 15609920, 15607491, 15608527, 15610733, 15610360, 15609191, 15608091, 15608092, 15607208, 15607940, 15609198, 15609658, 15609917, 15608531, 15610764, 15609591, 15609727, 15608013, 15607551, 57117131, 15608586, 15607383, 15608587, 15607198, 15607384, 15609599, 161352467, 15610961, 15609549, 57117128, 15608974, 15609541, 15608211, 15610554, 15610165, 15610166, 15607564, 15608273, 15609337, 15607955, 15608000, 15608613, 15610026, 57117036, 15608071, 15610336, 15610182, 15609168, 15609169, 15607840, 15609167, 15608768, 15610782, 448824754, 15610088, 15607842, 15607841, 15610982, 15608234, 15607772, 15608238, 15610985, 15610269, 15607269, 15608043, 15607644, 15608630, 15609614, 15609613, 15607352, 15608576, 15610454, 15608574, 15608776, 15607971, 15608432, 15609760, 15608435, 15607823, 15609249, 15609381, 15608980, 15607825, 15609382, 15607787, 15608769, 15608889, 57116810, 15608380, 15607581, 15609692, 15610188, 15607151, 15607781, 15609045, 15610410, 15610416, 15610417, 15610419, 15610391, 15609585, 15610593, 15608876, 15609352, 15610594, 15608029, 15609581, 15609350, 15607792, 15609211, 15607603, 15609357, 15607609, 15610421, 15608450, 57116786, 15607711, 15610579, 15610384, 15608755, 15610995, 15610525, 15609229, 15607807, 15608036, 448824781, 15610994, 15607273, 15611050, 15607616, 15607706                                                                                                                                                                                                                                                                                                                                                                                                                                                                                                                                                                                                                                                                                                                                                                                                                                                                                                                                                                                                                                                                                                                                                                                                                                                                                                                                                                                                                                                                                                                                                                                                                                                                                                                                                                                                                                                                                                                                                                                                                                                                                                                                                                                                                                                                                                                                                                                                                                                                                                                                                                                                                                                                                                                                                                                                                                                                                                                                                                                                                                                                                                       |
| 5829 | cytosol         | CellularComponent | 5.95E-14 | 5.50E-12 | 137 | 371  | 531 | 2477 | 15607530, 448824799, 15608468, 448824796, 57116734, 15609661, 15610226, 15607873, 15609850, 15608520, 15610936, 15608155, 15609920, 15607491, 15608527, 15610733, 15610360, 15609191, 15608091, 15608092, 15607208, 15607940, 15609198, 15609658, 15609917, 15608531, 15610764, 15609591, 15609727, 15608013, 15607551, 57117131, 15608586, 15607383, 15608587, 15607198, 15607384, 15609599, 15610961, 15609549, 57117128, 15608974, 15609541, 15608211, 15610554, 15610165, 15610166, 15607564, 15608273, 15609337, 15607955, 15608000, 15608613, 15610026, 57117036, 15608071, 15610336, 15610182, 15609168, 15609169, 15607840, 15609167, 15608768, 15610782, 448824754, 15610088, 15607842, 15607841, 15610982, 15608234, 15607772, 15608238, 15610985, 15610269, 15607269, 15608043, 15607644, 15608630, 15609614, 15609613, 15607352, 15608576, 15610454, 15608574, 15608776, 15607971, 15608432, 15609760, 15608435, 15607823, 15609249, 15609381, 15608980, 15607825, 15609382, 15607787, 15608769, 15608889, 57116810, 15608380, 15607581, 15609692, 15610188, 15607151, 15607781, 15609045, 15610410, 15610416, 15610417, 15610419, 15610391, 15609585, 15610593, 15608876, 15609352, 15610594, 15608029, 15609581, 15609350, 15607792, 15609211, 15607603, 15609357, 15607609, 15608450, 57116786, 15607711, 15610579, 15610384, 15608755, 15610995, 15610525, 15609229, 15607807, 15608036, 448824781, 15610994, 15607273, 15611050, 15607616, 15607706                                                                                                                                                                                                                                                                                                                                                                                                                                                                                                                                                                                                                                                                                                                                                                                                                                                                                                                                                                                                                                                                                                                                                                                                                                                                                                                                                                                                                                                                                                                                                                                                                                                                                                                                                                                                                                                                                                                                                                                                                                                                                                                                                                                                                                                                                                                                                                                                                                                                                                                                                                                                                                                                                                                                                                                                                                                                                                                                                                                                                                                                                                                                      |
| 5886 | plasma membrane | CellularComponent | 3.73E-33 | 3.67E-30 | 402 | 1323 | 531 | 2477 | 448824799, 448824796, 15607925, 15607223, 15607491, 15607938, 15607208, 15607940, 15609282, 15609592, 15607388, 15607389, 57117131, 15607382, 15607383, 15607384, 15607385, 15607949, 15609599, 15609494, 15607951, 15611016, 15609395, 15607372, 57117125, 15607230, 15607362, 15607364, 448824753, 57117015, 15609234, 15607269, 15607352, 448824769, 448824762, 448824761, 15607357, 15609249, 15609381, 15608385, 15609382, 15609204, 15609246, 15608380, 15607151, 15609258, 15607148, 15609352, 15609350, 15609359, 15609357, 15607330, 15607475, 448824785, 15607473, 448824781, 15608284, 15607321, 15608086, 15608154, 15608837, 15610363, 15610360, 15607407, 15608157, 15608092, 15610212, 15608097, 15607412, 15607411, 15608163, 15608969, 15608262, 15608067, 15608974, 15608273, 15608958, 15608071, 15608964, 15610236, 15608821, 15610336, 57116990, 15610275, 15607840, 15607844, 15607842, 15607841, 57116800, 15610269, 15610472, 57116704, 15608045, 15608992, 15608043, 15609614, 15609613, 15607352, 15608576, 15610454, 15607823, 15608980, 15607825, 57116856, 15608889, 57116810, 156116994, 15607720, 15610391, 57116820, 15608876, 15610593, 15610594, 15608024, 15610492, 15607717, 15610475, 15610384, 15610579, 15610578, 15610382, 15607807, 57116832, 15607808, 15608036, 15610276, 15611050, 15607706, 15610945, 15610139, 57116739, 15610038, 57116734, 57116735, 15610537, 15610805, 15610041, 15607873, 15610803, 15608520, 15610936, 57116727, 15608734, 15610147, 15608527, 15610146, 15608731, 15610406, 15610405, 15610937, 15609191, 15607688, 15610046, 345462027, 15608318, 57116724, 15609198, 15608321, 15608530, 15610546, 15608531, 15607744, 15608111, 15607551, 15608013, 15607847, 15607651, 15610019, 15607845, 15608112, 161352467, 15610961, 15608405, 15608313, 15608210, , 15607854, 15610655, 15610656, 15608214, 15607548, 15610553, 15610165, 15610554, 15610572, 15610166, 15607564, 15607856, 15607859, 57116747, 15608613, 15608000, 15610027, 15610950, 15610026, 15610032, 15607863, 15607864, 15608605, 15609890, 15609751, 15608621, 57116779, 15608622, 15608767, 15608768, 15608765, 15610438, 15608900, 57116682, 15610705, 15608234, 15607772, 15608372, 15607771, 15610706, 15608238, 15608379, 15607644, 15608630, 15609614, 15608631, 15609613, 57116768, 15610005, 15607641, 15610106, 15608219, 15607779, 15608776, 15610104, 15608779, 15609761, 15610305, 15609760, 15608774, 15607782, 15607784, 15607787, 15608908, 15608626, 15607781, 15610410, 15610412, 15610926, 15610416, 15610927, 15610419, 15610728, 15607795, 15607795, 15607791, 15607792, 15607791, 15607893, 15607603, 15607609, 15610421, 15610910, 57116786, 15610913, 15608755, 15610525, 15608749, 15608341, 15610812, 15607616, 15610528, 15608464, 15608659, 15609706, 15608468, 15609910, 15609324, 57117042, 15609848, 57117041, 15608463, 15609661, 15609319, 15609850, 15609665, 15609920, 15610733, 15609922, 15610736, 15610870, 15607186, 15609315, 15609013, 15609115, 15609863, 15608674, 15609658, 15609659, 15609917, 15609009, 15610764, 15609639, 15609638, 15608581, 15609006, 15609727, 15609726, 15609142, 15607196, 15610862, 15607195, 15607198, 1                                                                                                                                                                                                                                                                                                                                                                                                                                                                                                                                                                                                                                                                                                                                                                                                                                                                                                                                                                                                                                                                                                                                                                                                                                                                                                                                                                                    |



|       |                                  |                   |          |          |     |      |     |      |                                                                                                                                                                                                                                                                                                                                                                                                                                                                                                                                                                                                                                                                                                                                                                                                                                                                                                                                                                                                                                                                                                                                                                                                                                                                                                                                                                                                                                                                                                                                                                                                                                                                                                                                                                                                                                                                                                                                                                                                                                                                                                                                                                                                                                                                                                                                                                                                                                                                                                                                                                                                                                                                                                                                                                                                                                                                                                                                                                                                                                                                                                                                                                                                                                                                                                                                                                                                                                                                                                                                                                                                                                                                                                                                                                                                                                                                                                                                                                                                                                                                                                                                                                                       |
|-------|----------------------------------|-------------------|----------|----------|-----|------|-----|------|---------------------------------------------------------------------------------------------------------------------------------------------------------------------------------------------------------------------------------------------------------------------------------------------------------------------------------------------------------------------------------------------------------------------------------------------------------------------------------------------------------------------------------------------------------------------------------------------------------------------------------------------------------------------------------------------------------------------------------------------------------------------------------------------------------------------------------------------------------------------------------------------------------------------------------------------------------------------------------------------------------------------------------------------------------------------------------------------------------------------------------------------------------------------------------------------------------------------------------------------------------------------------------------------------------------------------------------------------------------------------------------------------------------------------------------------------------------------------------------------------------------------------------------------------------------------------------------------------------------------------------------------------------------------------------------------------------------------------------------------------------------------------------------------------------------------------------------------------------------------------------------------------------------------------------------------------------------------------------------------------------------------------------------------------------------------------------------------------------------------------------------------------------------------------------------------------------------------------------------------------------------------------------------------------------------------------------------------------------------------------------------------------------------------------------------------------------------------------------------------------------------------------------------------------------------------------------------------------------------------------------------------------------------------------------------------------------------------------------------------------------------------------------------------------------------------------------------------------------------------------------------------------------------------------------------------------------------------------------------------------------------------------------------------------------------------------------------------------------------------------------------------------------------------------------------------------------------------------------------------------------------------------------------------------------------------------------------------------------------------------------------------------------------------------------------------------------------------------------------------------------------------------------------------------------------------------------------------------------------------------------------------------------------------------------------------------------------------------------------------------------------------------------------------------------------------------------------------------------------------------------------------------------------------------------------------------------------------------------------------------------------------------------------------------------------------------------------------------------------------------------------------------------------------------------------|
| 16020 | membrane                         | CellularComponent | 6.10E-33 | 3.67E-30 | 402 | 1325 | 531 | 2477 | 448824799, 448824796, 15607925, 15607223, 15607491, 15607938, 15607208, 15607940, 15609282, 15609592, 15607388, 15607389, 57117131, 15607382, 15607383, 15607384, 15607385, 15607949, 15609599, 15609494, 15607951, 15611016, 15609395, 15607955, 15607372, 57117125, 15607230, 15607362, 15607364, 448824753, 57117015, 15609234, 15607269, 15607352, 448824762, 448824761, 15607357, 15609249, 15609381, 15608385, 15609382, 15609204, 15609246, 15608380, 15607151, 15609258, 15607148, 15609352, 15609350, 15609359, 15609357, 15607330, 15607475, 448824785, 15607473, 448824781, 15608284, 15607321, 15608086, 15608154, 15608837, 15610363, 15610360, 15607407, 15608157, 15608092, 15610212, 15608097, 15607412, 15607411, 15608163, 15608969, 15608262, 15608067, 15608974, 15608273, 15608958, 15608071, 15608964, 15610236, 15608966, 15608821, 15610336, 57116990, 15610275, 15607840, 15607844, 15607842, 15607841, 57116800, 15610269, 15610472, 57116704, 15608045, 15608043, 15608992, 15610454, 15610595, 15607823, 15608980, 15607825, 57116856, 15608889, 57116810, 57116994, 15607720, 15610391, 57116820, 15608876, 15610593, 15610594, 15608024, 15610492, 15607717, 15610475, 15610384, 15610579, 15610578, 15610382, 15607807, 57116832, 15607808, 15608036, 15610276, 15611050, 15607706, 15610945, 15610139, 57116739, 15610038, 57116734, 57116735, 15610537, 15610805, 15610041, 15607873, 15610803, 15608520, 15610936, 57116727, 15608734, 15610147, 15608527, 15610146, 15608731, 15610406, 15610405, 15610937, 15609191, 15607688, 15610046, 345462027, 15608318, 57116724, 15609198, 15608321, 15608530, 15610546, 15608531, 15607744, 15608111, 15607551, 15608013, 15607847, 15607651, 15610019, 15607845, 15608112, 161352467, 15610961, 15608210, 15608313, 15608405, , 15607854, 15608401, 15610655, 15610656, 15608214, 15607548, 15610553, 15610165, 15610554, 15610572, 15610166, 15607564, 15607856, 15607859, 57116747, 15608613, 15608000, 15610027, 15610950, 15610026, 15610032, 15607863, 15607864, 15608605, 15609890, 15609751, 15608621, 57116779, 15608622, 15608767, 15608768, 15608765, 15610438, 15608900, 57116682, 15610705, 15608234, 15607772, 15608372, 15607771, 15610706, 15608238, 15608379, 15607644, 15608630, 15609614, 15608631, 15609613, 57116768, 15610005, 15607641, 15610106, 15608219, 15607779, 15608776, 15610104, 15608779, 15609761, 15610305, 15609760, 15608774, 15607782, 15607784, 15607787, 15608908, 15608626, 15607781, 15610410, 15610412, 15610926, 15610416, 15610927, 15610419, 15610728, 15607795, 15607506, 15610121, 15607504, 15607792, 15607791, 15607893, 15607603, 15607609, 15610421, 15610910, 57116786, 57116903, 15610123, 15607525, 15610913, 15608755, 15610525, 15608749, 15608341, 15610812, 15607616, 15610528, 15608464, 15608659, 15609706, 15608468, 15609910, 15609324, 57117042, 15609848, 57117041, 15608463, 15609661, 15609319, 15609850, 15609665, 15609922, 15610733, 15609922, 15610736, 15610870, 15607186, 15609315, 15609013, 15609115, 15609863, 15608674, 15609658, 15609659, 15609917, 15609009, 15610764, 15609639, 15609638, 15608581, 15609006, 15609727, 15609726, 15609142, 15607196, 15610862, 15607195, 15607198, 15608587, 15608480, 57117019, 57117016, 15609546, 15608682, 15608788, 15609542, 15609433, 15609332, 15609435, 15609436, 15608592, 15609133, 15609337, 15609339, 15610852, 15609139, 15609333, 57117036, 15609840, 448824735, 15609632, 15608697, 15608792, 15608696, 15609743, 15610182, 15609168, 15609169, 15609167, 57117137, 57117081, 15610782, 15610088, 15608424, 15610982, 15610986, 15610985, 15609813, 15607573, 15609566, 15610988, 15609565, 15608576, 15608575, 15609056, 15610090, 15608574, 15607971, 15608432, 15609417, 15608437, 15608435, 15607580, 15607581, 448824818, 15607586, 15609692, 15610188, 15608542, 15609045, 15608447, 15610065, 15608446, 15608449, 15609976, 15608448, 15607291, 15609585, 57117168, 15607290, 15609581, 15607999, 15607297, 15610056, 15607296, 15607691, 15607598, 15608451, 15608450, 15610897, 15610077, 15609982, 15609038, 15610072, 15609675, 15610995, 15610994, 15609579 |
| 30312 | external encapsulating structure | CellularComponent | 2.17E-22 | 4.35E-20 | 252 | 740  | 531 | 2477 | 15610945, 15610139, 15608519, 15607873, 15610803, 15610532, 448824790, 15608520, 15610936, 57116727, 15607492, 15608734, 15610147, 15608527, 15607491, 15608731, 15610405, 15610937, 15607938, 57116724, 15607208, 15609198, 15608321, 15609282, 15608531, 15609591, 15609592, 15607388, 15608013, 15607389, 57117131, 15607847, 15607383, 15607384, 15610019, 15607846, 15609599, 161352467, 15610961, 15608405, 15608210, 15608401, 15607855, 15610656, 15611016, 15609395, 15608214, 15610553, 15607548, 15610554, 15610165, 15610166, 15607859, 15607955, 15610027, 15608000, 15608613, 15610026, 15607864, 15608605, 15607230, 15608622, 15608767, 15608768, 15608765, 448824753, 15610705, 15608234, 15607771, 57117015, 15609234, 15608238, 15607776, 15608630, 15609614, 15609613, 15607352, 57116768, 448824769, 15610005, 15610106, 15607779, 15608776, 15610104, 448824762, 15609760, 15608774, 15608385, 15609381, 15607782, 15609382, 15607784, 15607787, 15608380, 15608626, 15607151, 15610835, 15607781, 15607780, 15607488, 15610410, 15609603, 15610416, 15610417, 15610419, 15607148, 15609258, 15610728, 15607144, 15607795, 15607504, 15607792, 15607791, 15609357, 15607609, 15610421, 15607475, 57116786, 15610223, 15609661, 15609319, 15607321, 15609850, 15610223, 15609665, 15609920, 15610360, 15610733, 15609451, 15609117, 15608157, 15608091, 15608092, 15609510, 15610212, 15607412, 15608674, 15609917, 15610359, 15607411, 15609009, 15608163, 15609142, 15608969, 15607195, 15607198, 15608587, 15609347, 57117019, 15608682, 15608788, 15608974, 15609541, 15609926, 15609433, 15609435, 15609436, 15608592, 15609133, 15608273, 15609339, 15608958, 15609528, 15609333, 15610242, 57117036, 15609840, 448824735, 15608964, 15608071, 15608966, 15610236, 15609632, 15608792, 15608696, 15610187, 15610275, 57116990, 15610182, 15609168, 15609169, 15607840, 15609167, 15610784, 15609069, 15610782, 15610985, 15607573, 15610269, 15609565, 15610988, 15608045, 15610198, 15609056, 15608574, 15610090, 15607971, 15609417, 15608437, 15607823, 15607825, 15607581, 15607586, 448824818, 15609692, 15609045, 15609303, 15607720, 15608447, 15608446, 15608449, 15608448, 15609976, 15609585, 15607290, 57117168, 57116820, 15610593, 15610594, 15609581, 15607999, 15608451, 15608450, 15607711, 15607998, 15610384, 15610579, 15610077, 15607994, 15609982, 15610072, 15609675, 15607807, 15607808, 15610276, 15611050                                                                                                                                                                                                                                                                                                                                                                                                                                                                                                                                                                                                                                                                                                                                                                                                                                                                                                                                                                                                                                                                                                                                                                                                                                                                                                                                                                                                                                                                                                                                                                                                                                                                                                                         |
| 44424 | intracellular part               | CellularComponent | 2.37E-14 | 2.59E-12 | 145 | 397  | 531 | 2477 | 15607530, 448824799, 15608468, 448824796, 57116734, 15609661, 15610226, 15607873, 15609850, 15608520, 15610936, 57117051, 15608155, 15609920, 15607491, 15608527, 15610733, 15610360, 15609191, 15608091, 15608092, 15607208, 15607940, 15609198, 15609658, 15609917, 15608531, 15610764, 15609591, 15609727, 15608013, 15607551, 57117131, 15608586, 15607383, 15608587, 15607198, 15607384, 15609599, 161352467, 15610961, 15609549, 57117128, 15608974, 15609541, 15610553, 15608211, 15610554, 15610165, 15610166, 15607564, 15608273, 15609337, 15607955, 15608000, 15608613, 15610026, 57117036, 15608071, 15610336, 15610182, 15609168, 15609169, 15607840, 15609167, 15608768, 15610782, 448824754, 15610088, 15607842, 15607841, 15610982, 15608234, 15607772, 15608238, 15610985, 15610269, 15607269, 15608043, 15607644, 15608630, 15609614, 15609613, 15607352, 15608576, 15610454, 15608574, 15608776, 15607971, 15608432, 15609760, 15608435, 15607823, 15609249, 15609381, 15608980, 15607825, 15609382, 15607787, 15608769, 15608889, 57116810, 15608380, 15607581, 15609692, 15610188, 15607151, 15607781, 15609045, 15610410, 15610416, 15610417, 15610419, 15610391, 15609585, 15610593, 15608876, 15609352, 15610594, 15608029, 15609581, 15609350, 15607792, 15609211, 15607603, 15609357, 15607609, 15610421, 15608450, 57116786, 15607711, 15610579, 15610384, 15608755, 15610995, 15610525, 15609229, 15607807, 15608036, 448824781, 15610994, 15607273, 15611050, 15607616, 15607706                                                                                                                                                                                                                                                                                                                                                                                                                                                                                                                                                                                                                                                                                                                                                                                                                                                                                                                                                                                                                                                                                                                                                                                                                                                                                                                                                                                                                                                                                                                                                                                                                                                                                                                                                                                                                                                                                                                                                                                                                                                                                                                                                                                                                                                                                                                                                                                                                                                                                                                                                                                                                                                                         |
| 44444 | cytoplasmic part                 | CellularComponent | 3.61E-15 | 6.21E-13 | 144 | 386  | 531 | 2477 | 15607530, 448824799, 15608468, 448824796, 57116734, 15609661, 15610226, 15607873, 15609850, 15608520, 15610936, 57117051, 15608155, 15609920, 15607491, 15608527, 15610733, 15610360, 15609191, 15608091, 15608092, 15607208, 15607940, 15609198, 15609658, 15609917, 15608531, 15610764, 15609591, 15609727, 15608013, 15607551, 57117131, 15608586, 15607383, 15608587, 15607198, 15607384, 15609599, 161352467, 15610961, 15609549, 57117128, 15608974, 15609541, 15608211, 15610554, 15610165, 15610166, 15607564, 15608273, 15609337, 15607955, 15608000, 15608613, 15610026, 57117036, 15608071, 15610336, 15610182, 15609168, 15609169, 15607840, 15609167, 15608768, 15610782, 448824754, 15610088, 15607842, 15607841, 15610982, 15608234, 15607772, 15608238, 15610985, 15610269, 15607269, 15608043, 15607644, 15608630, 15609614, 15609613, 15607352, 15608576, 15610454, 15608574, 15608776, 15607971, 15608432, 15609760, 15608435, 15607823, 15609249, 15609381, 15608980, 15607825, 15609382, 15607787, 15608769, 15608889, 57116810, 15608380, 15607581, 15609692, 15610188, 15607151, 15607781, 15609045, 15610410, 15610416, 15610417, 15610419, 15610391, 15609585, 15610593, 15608876, 15609352, 15610594, 15608029, 15609581, 15609350, 15607792, 15609211, 15607603, 15609357, 15607609, 15610421, 15608450, 57116786, 15607711, 15610579, 15610384, 15608755, 15610995, 15610525, 15609229, 15607807, 15608036, 448824781, 15610994, 15607273, 15611050, 15607616, 15607706                                                                                                                                                                                                                                                                                                                                                                                                                                                                                                                                                                                                                                                                                                                                                                                                                                                                                                                                                                                                                                                                                                                                                                                                                                                                                                                                                                                                                                                                                                                                                                                                                                                                                                                                                                                                                                                                                                                                                                                                                                                                                                                                                                                                                                                                                                                                                                                                                                                                                                                                                                                                                                                                                   |

|       |                                |                   |          |          |     |      |     |      |                                                                                                                                                                                                                                                                                                                                                                                                                                                                                                                                                                                                                                                                                                                                                                                                                                                                                                                                                                                                                                                                                                                                                                                                                                                                                                                                                                                                                                                                                                                                                                                                                                                                                                                                                                                                                                                                                                                                                                                                                                                                                                                                                                                                                                                                                                                                                                                                                                                                                                                                                                                                                                                                                                                                                                                                                                                                                                                                                                                                                                                                                                                                                                                                                                                                                                                                                                                                                                                                                                                                                                                                                                                                                                                                                                                                                                                                                                                                                                                                                                                                                                                                                                                                                                                                                                                                                                                                                                                                                                                                                                                                                                                                                                                        |
|-------|--------------------------------|-------------------|----------|----------|-----|------|-----|------|------------------------------------------------------------------------------------------------------------------------------------------------------------------------------------------------------------------------------------------------------------------------------------------------------------------------------------------------------------------------------------------------------------------------------------------------------------------------------------------------------------------------------------------------------------------------------------------------------------------------------------------------------------------------------------------------------------------------------------------------------------------------------------------------------------------------------------------------------------------------------------------------------------------------------------------------------------------------------------------------------------------------------------------------------------------------------------------------------------------------------------------------------------------------------------------------------------------------------------------------------------------------------------------------------------------------------------------------------------------------------------------------------------------------------------------------------------------------------------------------------------------------------------------------------------------------------------------------------------------------------------------------------------------------------------------------------------------------------------------------------------------------------------------------------------------------------------------------------------------------------------------------------------------------------------------------------------------------------------------------------------------------------------------------------------------------------------------------------------------------------------------------------------------------------------------------------------------------------------------------------------------------------------------------------------------------------------------------------------------------------------------------------------------------------------------------------------------------------------------------------------------------------------------------------------------------------------------------------------------------------------------------------------------------------------------------------------------------------------------------------------------------------------------------------------------------------------------------------------------------------------------------------------------------------------------------------------------------------------------------------------------------------------------------------------------------------------------------------------------------------------------------------------------------------------------------------------------------------------------------------------------------------------------------------------------------------------------------------------------------------------------------------------------------------------------------------------------------------------------------------------------------------------------------------------------------------------------------------------------------------------------------------------------------------------------------------------------------------------------------------------------------------------------------------------------------------------------------------------------------------------------------------------------------------------------------------------------------------------------------------------------------------------------------------------------------------------------------------------------------------------------------------------------------------------------------------------------------------------------------------------------------------------------------------------------------------------------------------------------------------------------------------------------------------------------------------------------------------------------------------------------------------------------------------------------------------------------------------------------------------------------------------------------------------------------------------------------------|
| 44464 | cell part                      | CellularComponent | 2.87E-23 | 8.64E-21 | 452 | 1696 | 531 | 2477 | 448824799, 448824796, 15607925, 15607223, 448824790, 15607492, 15607491, 15607938, 15607208, 15607940, 15609282, 15609591, 15609592, 15607388, 15607389, 57117131, 15607382, 15607383, 15607384, 15607385, 15607949, 15609599, 15609494, 57117128, 15607951, 15611016, 15609395, 15607372, 15607955, 57117125, 15607230, 15607362, 15607364, 448824754, 448824753, 57117015, 15609234, 15607269, 15607352, 448824769, 448824762, 448824761, 15607357, 15609249, 15609381, 15608385, 15609382, 15609204, 15609246, 15608380, 15607151, 15607488, 15607148, 15609258, 15609352, 15607144, 15609350, 15609211, 15609359, 15609357, 15607330, 15607475, 448824785, 15607473, 15609229, 448824781, 15607273, 15608284, 15610226, 15607321, 15610223, 15608086, 15608154, 15608155, 15608837, 15610363, 15610360, 15607407, 15608157, 15608091, 15608092, 15610212, 15608097, 15607412, 15610359, 15607411, 15608163, 15608969, 15608262, 15608067, 15608974, 15608273, 15608958, 15610242, 15608071, 15608964, 15608966, 15610236, 15608821, 15610336, 15610275, 57116990, 15607840, 15607844, 15607842, 15607841, 57116800, 15610269, 15610472, 57116704, 15608045, 15608992, 15608043, 15610454, 15610595, 15607823, 15608980, 15607825, 57116856, 15608889, 57116810, 57116994, 15607720, 15610391, 57116820, 15608876, 15610593, 15608029, 15610594, 15608024, 15610492, 15607717, 15610475, 15607711, 15610384, 15610579, 15610578, 15610382, 15607807, 57116832, 15607808, 15608036, 15610276, 15611050, 15607706, 15610945, 15607530, 15610139, 57116739, 15608519, 15610038, 57116734, 57116735, 15610537, 15610805, 15610041, 15607873, 15610803, 15610532, 15608520, 15610936, 57116727, 15608734, 15610147, 15608527, 15610146, 15608731, 15610406, 15610405, 15610937, 15609191, 15607688, 15610046, 345462027, 15608318, 57116724, 15609198, 15608321, 15608530, 15610546, 15608531, 15607744, 15608111, 15607551, 15608013, 15607847, 15607651, 15607846, 15610019, 15607845, 15608112, 161352467, 15610961, 15608405, 15608313, 15608210, , 15607854, 15610655, 15608401, 15607855, 15610656, 15608214, 15610553, 15608211, 15607548, 15610554, 15610165, 15610572, 15610166, 15607564, 15607856, 57116747, 15607859, 15610027, 15608000, 15608613, 15610950, 15610026, 15610032, 15607863, 15607864, 15608605, 15609890, 15609751, 15608621, 57116779, 15608622, 15608767, 15608768, 15608765, 15610438, 15608900, 57116682, 15610705, 15608234, 15607772, 15608372, 15607771, 15610706, 15608238, 15607776, 15608379, 15607644, 15608630, 15609614, 15608631, 15609613, 57116768, 15610005, 15607641, 15610106, 15608219, 15607779, 15608776, 15610104, 15608779, 15609761, 15610305, 15609760, 15608774, 15607782, 15607784, 15607787, 15608769, 15608908, 15608626, 15610835, 15607781, 15607780, 15610410, 15610412, 15609603, 15610926, 15610416, 15610927, 15610417, 15610419, 15610728, 15607795, 15607506, 15610121, 15607504, 15607792, 15607791, 15607893, 15607603, 15607609, 15610421, 15610910, 57116786, 57116903, 15610123, 15607525, 15610913, 15608755, 15610525, 15608749, 15608341, 15610812, 15607616, 15610528, 15608464, 15608659, 15609706, 15608468, 15609910, 15609709, 15609324, 15609322, 57117044, 57117042, 15609848, 57117041, 15608463, 15609661, 15609319, 15609850, 15609665, 57117051, 15609920, 15610733, 15609922, 15609451, 15610736, 15609117, 15610870, 15607186, 15609315, 15609013, 15609115, 15609510, 15609863, 15608674, 15609658, 15609659, 15609917, 15609009, 15610764, 15609639, 15609638, 15608581, 15609006, 15609727, 15609726, 15609142, 15607196, 15610862, 15607195, 15608586, 15607198, 15608587, 15609347, 15608480, 57117019, 15609549, 57117016, 15609546, 15608682, 15608788, 15609542, 15609541, 15609926, 15609433, 15609332, 15609435, 15609436, 15608592, 15609133, 15609337, 15609339, 15610852, 15609139, 15609333, 15609528, 57117036, 15609840, 448824735, 15609632, 15608697, 15608792, 15608696, 15609743, 15610187, 15610182, 15609168, 15609169, 15609167, 15610784, 15609069, 57117081, 57117137, 15610782, 15610088, 15608424, 15610982, 15610986, 15610985, 15607573, 15609813, 15609566, 15609565, 15610988, 15610198, 15608576, 15609056, 15608575, 15608574, 15610090, 15607971, 15608432, 15609417, 15608437, 15608435, 15607580, 15607581, 15607586, 448824818, 15609692, 15610188, 15609045, 15608542, 15609303, 15608447, 15608446, 15610065, 15608449, 15608448, 15609976, 15609585, 15607291, 15607290, 57117168, 15609581, 15607999, 15607297, 15610056, 15607296, 15607691, 15607598, 15608451, 15608450, 15610897, 15607998, 15610077, 15607994, 15609982, 15609038, 15610072, 15609675, 15610995, 15610994, 15609579 |
| 45254 | pyruvate dehydrogenase complex | CellularComponent | 2.09E-03 | 3.19E-02 | 4   | 4    | 531 | 2477 | 15609352, 448824781, 15607603, 161352467                                                                                                                                                                                                                                                                                                                                                                                                                                                                                                                                                                                                                                                                                                                                                                                                                                                                                                                                                                                                                                                                                                                                                                                                                                                                                                                                                                                                                                                                                                                                                                                                                                                                                                                                                                                                                                                                                                                                                                                                                                                                                                                                                                                                                                                                                                                                                                                                                                                                                                                                                                                                                                                                                                                                                                                                                                                                                                                                                                                                                                                                                                                                                                                                                                                                                                                                                                                                                                                                                                                                                                                                                                                                                                                                                                                                                                                                                                                                                                                                                                                                                                                                                                                                                                                                                                                                                                                                                                                                                                                                                                                                                                                                               |

Table S4B. Complete list of PFAM domain and KEGG pathway enriched in the *M. tuberculosis* H37Rv succinylome.

| Category     | ID       | Term                                                | Fold Enrichment | PValue  | Count | %    | Genes                                                                                                                                                                                                                                                                                                                | List Total | Pop Hits | Pop Total | Bonferroni | Benjamini | FDR    |
|--------------|----------|-----------------------------------------------------|-----------------|---------|-------|------|----------------------------------------------------------------------------------------------------------------------------------------------------------------------------------------------------------------------------------------------------------------------------------------------------------------------|------------|----------|-----------|------------|-----------|--------|
| PFAM         | PF00107  | ADH_zinc_N                                          | 2.700904159     | 0.01005 | 10    | 1.65 | 15607291, 15608321, 15610182, 57116779, 15608592, 15610223, 15610862, 15610077, 15610913, 15610961                                                                                                                                                                                                                   | 553        | 50       | 7468      | 0.9999657  | 0.6808538 | 14.777 |
| PFAM         | PF08240  | ADH_N                                               | 2.700904159     | 0.01005 | 10    | 1.65 | 15607291, 15608321, 15610182, 57116779, 15608592, 15610223, 15610862, 15610077, 15610913, 15610961                                                                                                                                                                                                                   | 553        | 50       | 7468      | 0.9999657  | 0.6808538 | 14.777 |
| PFAM         | PF00378  | Enoyl-CoA hydratase/isomerase family                | 4.501506932     | 0.00132 | 8     | 1.32 | 15610910, 15610652, 15607772, 57116767, 15607363, 15609816, 15607688, 15608211                                                                                                                                                                                                                                       | 553        | 24       | 7468      | 0.7401245  | 0.1550215 | 2.0744 |
| PFAM         | PF02771  | Acyl-CoA dehydrogenase, N-terminal domain           | 3.858434513     | 0.00076 | 10    | 1.65 | 15607541, 15610275, 15610410, 15610699, 15607273, 15607296, 15608013, 15608112, 15609926, 15610640                                                                                                                                                                                                                   | 553        | 35       | 7468      | 0.5401269  | 0.1050363 | 1.2011 |
| PFAM         | PF00378  | ECH                                                 | 3.307229583     | 0.00071 | 12    | 1.98 | 15610910, 15608210, 15610652, 15607772, 15608111, 57116767, 15607363, 15609816, 15607688, 15608000, 15608045, 15608211                                                                                                                                                                                               | 553        | 49       | 7468      | 0.5169596  | 0.1142104 | 1.1255 |
| PFAM         | PF02771  | Acyl-CoA_dh_N                                       | 3.259711916     | 0.00024 | 14    | 2.31 | 15607541, 15610410, 15610198, 15610275, 15608013, 15608112, 15610699, 15607273, 15607296, 15607412, 15607892, 15609926, 15610640, 15609637                                                                                                                                                                           | 553        | 58       | 7468      | 0.2195113  | 0.0483586 | 0.3848 |
| PFAM         | PF00441  | Acyl-CoA dehydrogenase, C-terminal domain           | 4.309953445     | 4.3E-06 | 15    | 2.48 | 15607541, 15610275, 15610410, 15610933, 15608486, 15608013, 15607372, 15608112, 15607385, 15610699, 15607273, 15607296, 15610276, 15609926, 15610640                                                                                                                                                                 | 553        | 47       | 7468      | 0.0043656  | 0.0010932 | 0.0068 |
| PFAM         | PF00441  | Acyl-CoA_dh_I                                       | 3.751255777     | 6.8E-07 | 20    | 3.3  | 15607541, 15610275, 15610410, 15610198, 15610933, 15608486, 15608013, 15607372, 15607385, 15608112, 15610699, 15608605, 15607296, 15607273, 15607412, 15610276, 15607892, 15609926, 15610640, 15609637                                                                                                               | 553        | 72       | 7468      | 0.0006943  | 0.0002315 | 0.0011 |
| PFAM         | PF02770  | Acyl-CoA dehydrogenase, middle domain               | 4.801607394     | 3.8E-07 | 16    | 2.64 | 15607541, 15610275, 15610410, 15610198, 15610933, 15608486, 15608013, 15607372, 15608112, 15607385, 15607273, 15607296, 15607412, 15610276, 15609926, 15610640                                                                                                                                                       | 553        | 45       | 7468      | 0.0003894  | 0.0001947 | 0.0006 |
| PFAM         | PF02770  | Acyl-CoA_dh_M                                       | 4.110071547     | 6.3E-08 | 21    | 3.47 | 15607541, 15610275, 15610410, 15610198, 15610933, 15608486, 15608013, 15607372, 15607385, 15608112, 15610231, 15610706, 15608605, 15607296, 15607273, 15607412, 15610276, 15607892, 15609926, 15610640, 15609637                                                                                                     | 553        | 69       | 7468      | 6.43E-05   | 6.43E-05  | 0.0001 |
| KEGG_PATHWAY | mtu00630 | Glyoxylate and dicarboxylate metabolism             | 3.423762376     | 0.01021 | 7     | 1.16 | 15608029, 15608036, 15608380, 15608974, 15608613, 15610492, 57116734                                                                                                                                                                                                                                                 | 303        | 15       | 2223      | 0.9386489  | 0.0564905 | 12.635 |
| KEGG_PATHWAY | mtu00400 | Phenylalanine, tyrosine and tryptophan biosynthesis | 3.260726073     | 0.00664 | 8     | 1.32 | 15609675, 15609674, 15609677, 15608749, 15610974, 15610363, 15608741, 15609315                                                                                                                                                                                                                                       | 303        | 18       | 2223      | 0.8366639  | 0.0378184 | 8.3953 |
| KEGG_PATHWAY | mtu00770 | Pantothenate and CoA biosynthesis                   | 3.260726073     | 0.00664 | 8     | 1.32 | 15607330, 15610139, 15608769, 15610736, 57117044, 15610102, 15609347, 15608530                                                                                                                                                                                                                                       | 303        | 18       | 2223      | 0.8366639  | 0.0378184 | 8.3953 |
| KEGG_PATHWAY | mtu00072 | Synthesis and degradation of ketone bodies          | 4.27970297      | 0.0027  | 7     | 1.16 | 15607999, 15609640, 15610692, 15607384, 15609641, 15608214, 15608463                                                                                                                                                                                                                                                 | 303        | 12       | 2223      | 0.5200882  | 0.0165469 | 3.4905 |
| KEGG_PATHWAY | mtu00240 | Pyrimidine metabolism                               | 2.445544554     | 0.00262 | 14    | 2.31 | 57117051, 15608837, 15608519, 15609920, 15608767, 15610593, 15607807, 15607808, 57116856, 15607144, 15609834, 15608523, 15610188, 15608520                                                                                                                                                                           | 303        | 42       | 2223      | 0.5099383  | 0.0164498 | 3.3927 |
| KEGG_PATHWAY | mtu00190 | Oxidative phosphorylation                           | 2.392380542     | 0.00216 | 15    | 2.48 | 15608451, 15608450, 15609332, 15610764, 15610286, 15610454, 15610285, 15607388, 15607389, 15608447, 15608446, 15609337, 15608449, 15608448, 15609333, 15610121                                                                                                                                                       | 303        | 46       | 2223      | 0.4445445  | 0.0142383 | 2.8053 |
| KEGG_PATHWAY | mtu00480 | Glutathione metabolism                              | 4.192362093     | 0.00117 | 8     | 1.32 | 15607913, 57116832, 15610475, 15609350, 15607407, 15608262, 57116994, 15607208                                                                                                                                                                                                                                       | 303        | 14       | 2223      | 0.2717346  | 0.0080975 | 1.5228 |
| KEGG_PATHWAY | mtu00624 | 1- and 2-Methylnaphthalene degradation              | 2.559290813     | 0.00104 | 15    | 2.48 | 15610275, 15610410, 15610897, 15608486, 57116779, 15608013, 15607364, 15607385, 15608112, 15610699, 15608605, 15607412, 15607892, 15609926, 15610640                                                                                                                                                                 | 303        | 43       | 2223      | 0.2457393  | 0.007394  | 1.3555 |
| KEGG_PATHWAY | mtu00930 | Caprolactam degradation                             | 3.076652827     | 0.0004  | 13    | 2.15 | 15610910, 15608111, 15610182, 57116767, 15607363, 15609816, 15608000, 15608284, 15608210, 15610652, 15607772, 15608045, 15608211                                                                                                                                                                                     | 303        | 31       | 2223      | 0.10341    | 0.0030275 | 0.5269 |
| KEGG_PATHWAY | mtu00632 | Benzoate degradation via CoA ligation               | 2.33921653      | 0.00018 | 22    | 3.63 | 15607541, 15610910, 15608111, 57116767, 15610454, 15609816, 15607363, 15607388, 15607389, 15610692, 15610065, 15607384, 15608000, 57117037, 15608463, 15608210, 15607772, 15610652, 15607999, 15607609, 15608045, 15608214, 15608211                                                                                 | 303        | 69       | 2223      | 0.0466492  | 0.0014918 | 0.2309 |
| KEGG_PATHWAY | mtu00030 | Pentose phosphate pathway                           | 4.247524752     | 5.5E-05 | 11    | 1.82 | 57116993, 57116832, 15610147, 15608086, 15607504, 15609166, 15608586, 15608262, 15608587, 57117081, 15608157                                                                                                                                                                                                         | 303        | 19       | 2223      | 0.0149003  | 0.0005003 | 0.0726 |
| KEGG_PATHWAY | mtu00230 | Purine metabolism                                   | 2.603321622     | 3E-05   | 22    | 3.63 | 15607530, 57117051, 15610411, 15607912, 15610412, 15609920, 15608767, 15609339, 15607949, 15607498, 15608157, 15608755, 15607807, 15610593, 15608980, 15607808, 15607144, 15607873, 15608097, 15610532, 15610546, 15610188                                                                                           | 303        | 62       | 2223      | 0.0080752  | 0.0002795 | 0.0392 |
| KEGG_PATHWAY | mtu03018 | RNA degradation                                     | 6.521452145     | 2.3E-05 | 8     | 1.32 | 57117168, 15609581, 15609920, 15607491, 15608163, 15610121, 15607581, 15608437, 15610553                                                                                                                                                                                                                             | 303        | 9        | 2223      | 0.0061268  | 0.0002276 | 0.0297 |
| KEGG_PATHWAY | mtu00310 | Lysine degradation                                  | 2.965873183     | 1.7E-05 | 19    | 3.14 | 15607541, 15610910, 15608111, 57116767, 15609816, 15607363, 15610692, 15607384, 15608000, 15608284, 15608463, 15608210, 15607772, 15610652, 15609352, 15607999, 15608045, 15608214, 15608211                                                                                                                         | 303        | 47       | 2223      | 0.0045245  | 0.0001814 | 0.0219 |
| KEGG_PATHWAY | mtu00620 | Pyruvate metabolism                                 | 3.220961121     | 8.2E-06 | 18    | 2.97 | 15609009, 15607352, 15610692, 15610104, 15607384, 15610671, 15608755, 57117037, 15608463, 15607999, 15610803, 15608974, 15608380, 15609632, 15607603, 57116784, 15608214, 15607549                                                                                                                                   | 303        | 41       | 2223      | 0.0022331  | 0.0001016 | 0.0108 |
| KEGG_PATHWAY | mtu00410 | beta-Alanine metabolism                             | 3.370885737     | 8E-06   | 17    | 2.81 | 15610910, 15608111, 57116767, 15607363, 15609816, 15609726, 15607372, 15608000, 15608210, 15607772, 15610652, 15607296, 15607273, 15610568, 15610276, 15608045, 15608211                                                                                                                                             | 303        | 37       | 2223      | 0.0021677  | 0.0001033 | 0.0105 |
| KEGG_PATHWAY | mtu00380 | Tryptophan metabolism                               | 3.056930693     | 5.4E-06 | 20    | 3.3  | 15609045, 15607541, 15610910, 15608111, 57116767, 15609816, 15607363, 15610692, 15607384, 15608000, 15608284, 15608463, 15608210, 15607772, 15610652, 15607999, 15610472, 15608045, 15608214, 15608211                                                                                                               | 303        | 48       | 2223      | 0.0014723  | 7.367E-05 | 0.0071 |
| KEGG_PATHWAY | mtu00970 | Aminoacyl-tRNA biosynthesis                         | 4.465777012     | 1.3E-06 | 14    | 2.31 | 15609751, 15610146, 15609709, 15610734, 15608432, 15609982, 15609494, 57117041, 15609585, 57117128, 15608788, 15609692, 15610472, 15608674                                                                                                                                                                           | 303        | 23       | 2223      | 0.0003656  | 2.285E-05 | 0.0018 |
| KEGG_PATHWAY | mtu00250 | Alanine, aspartate and glutamate metabolism         | 4.401980198     | 6E-07   | 15    | 2.48 | 15610572, 15609613, 15609726, 57116903, 15607498, 15610995, 57116856, 15610994, 15610568, 15608523, 15609359, 15609917, 57116704, 15609357, 15608520                                                                                                                                                                 | 303        | 25       | 2223      | 0.0001631  | 1.165E-05 | 0.0008 |
| KEGG_PATHWAY | mtu00010 | Glycolysis / Gluconeogenesis                        | 3.872112211     | 1.4E-07 | 19    | 3.14 | 57116739, 15610147, 15607352, 15608576, 15610182, 15608163, 57116779, 15608575, 15608574, 15609166, 57117081, 15608755, 15610803, 15607504, 15608086, 15609632, 15609556, 15607603, 57116784                                                                                                                         | 303        | 36       | 2223      | 3.766E-05  | 3.138E-06 | 0.0002 |
| KEGG_PATHWAY | mtu00071 | Fatty acid metabolism                               | 3.386138614     | 4.5E-08 | 24    | 3.96 | 15607541, 15610910, 15608111, 57116767, 15609816, 15607363, 57116779, 15610692, 15609324, 15607384, 15607372, 15608000, 15608284, 15608463, 15608210, 15607772, 15610652, 15607999, 15607296, 15607273, 15610276, 15608045, 15608214, 15608211                                                                       | 303        | 52       | 2223      | 1.211E-05  | 1.101E-06 | 6E-05  |
| KEGG_PATHWAY | mtu00281 | Geraniol degradation                                | 3.233092801     | 3.2E-08 | 26    | 4.29 | 15610410, 15610275, 15608486, 15608111, 15607363, 15608013, 15607364, 15608112, 15607385, 15608284, 15608210, 15607772, 15610652, 15610699, 15607892, 15609926, 15608045, 15608211, 15610910, 15610897, 57116767, 15609816, 15608000, 15608605, 15607412, 15610640                                                   | 303        | 59       | 2223      | 8.779E-06  | 8.779E-07 | 4E-05  |
| KEGG_PATHWAY | mtu00650 | Butanoate metabolism                                | 3.236750146     | 2E-09   | 30    | 4.95 | 15610139, 15608111, 15607388, 15607363, 15609726, 15607389, 15607384, 57117044, 15608284, 15608463, 15608210, 15607772, 15610652, 15607999, 15609640, 15610223, 15609641, 57116704, 15608045, 15607609, 15608214, 15608211, 15610910, 57116767, 15610454, 15609816, 15610692, 57116903, 15608000, 15610671, 15610568 | 303        | 68       | 2223      | 5.32E-07   | 5.912E-08 | 3E-06  |
| KEGG_PATHWAY | mtu00020 | Citrate cycle (TCA cycle)                           | 4.531450204     | 5.9E-10 | 21    | 3.47 | 15610475, 15607352, 15609591, 15609592, 15610454, 15607388, 15607389, 15610104, 15608613, 15608091, 15608092, 15607208, 15609352, 15608029, 15610212, 15608036, 15608380, 15608238, 15609632, 15607603, 15609635, 57116784                                                                                           | 303        | 34       | 2223      | 1.609E-07  | 2.011E-08 | 8E-07  |



|              |          |                                            |             |         |    |      |                                                                                                                                                                                                                                                                                                                                                                        |     |    |      |           |           |       |
|--------------|----------|--------------------------------------------|-------------|---------|----|------|------------------------------------------------------------------------------------------------------------------------------------------------------------------------------------------------------------------------------------------------------------------------------------------------------------------------------------------------------------------------|-----|----|------|-----------|-----------|-------|
| KEGG_PATHWAY | mtu00640 | Propanoate metabolism                      | 3.445994599 | 1.5E-10 | 31 | 5.12 | 15609639, 15608111, 15607363, 15609726, 15610416, 15608114, 15607384, 15608463, 15608210, 15607772, 15610652, 15607999, 15610803, 15607296, 15607893, 15608045, 15608214, 15608211, 15607549, 15610910, 15608630, 15608631, 57116767, 15609816, 15610692, 15607372, 15608000, 15608091, 15608092, 15607273, 15610276                                                   | 303 | 66 | 2223 | 3.953E-08 | 5.647E-09 | 2E-07 |
| KEGG_PATHWAY | mtu00280 | Valine, leucine and isoleucine degradation | 3.912871287 | 9.3E-13 | 32 | 5.28 | 15609639, 15608111, 15607363, 15610416, 15608114, 15607384, 15609347, 15608284, 15608463, 15608210, 15607772, 15610652, 15607999, 15609640, 15607296, 15609641, 15607893, 15607603, 15608045, 15608214, 57116784, 15608211, 15610910, 15608630, 15608631, 57116767, 15609816, 15610692, 15607372, 15608000, 15607273, 15610276                                         | 303 | 60 | 2223 | 2.531E-10 | 5.062E-11 | 1E-09 |
| KEGG_PATHWAY | mtu03010 | Ribosome                                   | 4.802160216 | 2.8E-18 | 36 | 5.94 | 15607840, 15607847, 15608768, 15607195, 15607198, 15607846, 15607845, 15607844, 15607842, 15607841, 15609549, 15610594, 15610041, 15607854, 15607855, 15607792, 15607791, 57116808, 57116764, 15608155, 15609922, 15610579, 15607856, 15610046, 15607859, 15610578, 15607858, 15610595, 15610027, 15607823, 57116686, 15607862, 15607863, 15609579, 15607781, 15607780 | 303 | 55 | 2223 | 7.695E-16 | 3.847E-16 | 4E-15 |
