# Supplementary material
Source: PubMed Central journal article supplement (PMC4390261)
Supplement: supp_M114.045922_mcp.M114.045922-6.pdf [file supp_M114.045922_mcp.M114.045922-6.pdf]

Table S5A. Detailed information about motif analysis with motif-X.

| Genbank Accession | Gene Description                                                                                                                                                                             | Extract Sequence (13 aa) | Motif Pattern |
|-------------------|----------------------------------------------------------------------------------------------------------------------------------------------------------------------------------------------|--------------------------|---------------|
| gi 15607372       | Probable acyl-CoA dehydrogenase FadE4                                                                                                                                                        | AAKGVEKDTFFET            | ....EK.....   |
| gi 57116786       | Probable acyl-[acyl-carrier protein] desaturase DesA1 (acyl-[ACP] desaturase) (stearoyl-ACP desaturase) (protein Des)                                                                        | LEPVVEKYLNRHL            | ....EK.....   |
| gi 15611017       | Secreted ESX-1 substrate protein B, EspB. Conserved alanine and glycine rich protein                                                                                                         | YQQRSEKVLTEYN            | ....EK.....   |
| gi 15609324       | Long-chain-fatty-acid-CoA ligase FadD15 (fatty-acid-CoA synthetase) (fatty-acid-CoA synthase)                                                                                                | VPRVFEKVYNTAE            | ....EK.....   |
| gi 15608889       | Probable oxidoreductase                                                                                                                                                                      | QVTLLEKHGDFLR            | ....EK.....   |
| gi 15607581       | 60 kDa chaperonin 2 GroEL2 (protein CPN60-2) (GroEL protein 2) (65 kDa antigen) (heat shock protein 65) (cell wall protein A) (antigen A)                                                    | DKPEKEKASVPGG            | ....EK.....   |
| gi 15609234       | Proteasome accessory factor a PafA                                                                                                                                                           | PHADAEKYRRLHV            | ....EK.....   |
| gi 15610554       | 10 kDa chaperonin GroES (protein CPN10) (protein GroES) (BCG-a heat shock protein) (10 kDa antigen)                                                                                          | WDEDGEKRIPLDV            | ....EK.....   |
| gi 15607352       | Probable iron-regulated phosphoenolpyruvate carboxykinase [GTP] PckA (phosphoenolpyruvate carboxylase) (PEPCK)(pep carboxykinase)                                                            | GKAALEKMGDDGF            | ....EK.....   |
| gi 15607807       | DNA-directed RNA polymerase (beta chain) RpoB (transcriptase beta chain) (RNA polymerase beta subunit)                                                                                       | MRSTLEKDNVTGT            | ....EK.....   |
| gi 15610231       | Conserved hypothetical protein                                                                                                                                                               | IEILAELKIARWAR           | ....EK.....   |
| gi 15608045       | Possible enoyl-CoA hydratase EchA6 (enoyl hydratase) (unsaturated acyl-CoA hydratase) (crotonase)                                                                                            | MLLSAEKLTAEIA            | ....EK.....   |
| gi 15607581       | 60 kDa chaperonin 2 GroEL2 (protein CPN60-2) (GroEL protein 2) (65 kDa antigen) (heat shock protein 65) (cell wall protein A) (antigen A)                                                    | IEKAVEKVTTLL             | ....EK.....   |
| gi 15607296       | Probable acyl-CoA dehydrogenase FadE2                                                                                                                                                        | ARLLCEKAAWTID            | ....EK.....   |
| gi 57117125       | Arylamine N-acetyltransferase Nat (arylamine acetylase)                                                                                                                                      | RAGGTEKIRLADA            | ....EK.....   |
| gi 15609920       | Bifunctional protein polyribonucleotide nucleotidyltransferase GpsI: guanosine pentaphosphate synthetase + polyribonucleotide nucleotidyltransferase (polynucleotide phosphorylase) (pnpase) | TYEGREKEVGAAL            | ....EK.....   |
| gi 15607504       | Probable fructose-bisphosphate aldolase Fba                                                                                                                                                  | SPEDFEKTIEALG            | ....EK.....   |
| gi 15608630       | Probable methylmalonyl-CoA mutase small subunit MutA (MCM)                                                                                                                                   | YLAGEPEKALGDAA           | ....EK.....   |
| gi 15609013       | Probable bacterioferritin BfrA                                                                                                                                                               | IVMCREKQDTTSA            | ....EK.....   |
| gi 15610706       | Possible oxidoreductase. Possible 3-hydroxy-9,10-seconandrost-1,3,5(10)-triene-9,17-dione hydroxylase                                                                                        | AAFAGEKAKDDPF            | ....EK.....   |
| gi 15609417       | Probable dehydrogenase                                                                                                                                                                       | LIEAREKAFWAAK            | ....EK.....   |
| gi 15609282       | Diviva family protein Wag31                                                                                                                                                                  | LRQAQEKADALQA            | ....EK.....   |
| gi 57116786       | Probable acyl-[acyl-carrier protein] desaturase DesA1 (acyl-[ACP] desaturase) (stearoyl-ACP desaturase) (protein Des)                                                                        | DPVELEKLRLEVV            | ....EK.....   |
| gi 15607808       | DNA-directed RNA polymerase (beta' chain) RpoC (transcriptase beta' chain) (RNA polymerase beta' subunit)                                                                                    | RADKVEKQFQGA             | ....EK.....   |
| gi 15609585       | Probable valyl-tRNA synthase protein ValS (valyl-tRNA synthetase) (valine--tRNA ligase) (valine transase)                                                                                    | GRVVEEKRPYLHS            | ....EK.....   |
| gi 15607781       | 50S ribosomal protein L1 RplA                                                                                                                                                                | VFAVGEKADAAVA            | ....EK.....   |
| gi 15610286       | Probable NADH dehydrogenase I (chain F) NuoF (NADH-ubiquinone oxidoreductase chain F)                                                                                                        | RSMGSEKSPGFTL            | ....EK.....   |
| gi 15608765       | Probable nonspecific lipid-transfer protein                                                                                                                                                  | SKSFTEKHLGSA             | ....EK.....   |
| gi 15607581       | 60 kDa chaperonin 2 GroEL2 (protein CPN60-2) (GroEL protein 2) (65 kDa antigen) (heat shock protein 65) (cell wall protein A) (antigen A)                                                    | LEDPYEKIGAEV             | ....EK.....   |
| gi 15610728       | Possible heme degrading protein MhuD                                                                                                                                                         | AGPELEKRFHRA             | ....EK.....   |
| gi 15607581       | 60 kDa chaperonin 2 GroEL2 (protein CPN60-2) (GroEL protein 2) (65 kDa antigen) (heat shock protein 65) (cell wall protein A) (antigen A)                                                    | PGVVAEKVRNLPA            | ....EK.....   |
| gi 15610416       | Probable propionyl-CoA carboxylase beta chain 5 AccD5 (pccase) (propanoyl-CoA:carbon dioxide ligase)                                                                                         | NFNLGEKRPLGDG            | ....EK.....   |
| gi 15609848       | Iron-dependent repressor and activator IdeR                                                                                                                                                  | HLELTKERLALAI            | ....EK.....   |
| gi 15607581       | 60 kDa chaperonin 2 GroEL2 (protein CPN60-2) (GroEL protein 2) (65 kDa antigen) (heat shock protein 65) (cell wall protein A) (antigen A)                                                    | RNVVLEKKWGAPT            | ....EK.....   |
| gi 57116903       | Possible succinate-semialdehyde dehydrogenase [NADP+] dependent (SSDH) GabD2                                                                                                                 | ERIVVEKDIAEEF            | ....EK.....   |
| gi 161352467      | Multifunctional alpha-ketoglutarate metabolic enzyme                                                                                                                                         | VQPVLEKRREMY             | ....EK.....   |
| gi 15608992       | Possible oxidoreductase                                                                                                                                                                      | YGTGVEKLFPSVI            | ....EK.....   |
| gi 15610305       | Conserved protein                                                                                                                                                                            | GMWKGKFFVVRT             | ....EK.....   |
| gi 448824790      | Probable lipid-transfer protein Ltp1                                                                                                                                                         | GMTKFEKPGRRRG            | ....EK.....   |
| gi 15610026       | Probable elongation factor Tsf (EF-ts)                                                                                                                                                       | SAKIGEKLELRRV            | ....EK.....   |
| gi 15610417       | Probable bifunctional protein acetyl-/propionyl-coenzyme A carboxylase (epsilon chain) AccE5                                                                                                 | PAPVTEKPLHPHE            | ....EK.....   |
| gi 15608767       | Probable DNA polymerase I PolA                                                                                                                                                               | PEAVVEKYGLTPR            | ....EK.....   |
| gi 15610936       | Polyketide synthase Pks13                                                                                                                                                                    | PRDVVEKEPEPEP            | ....EK.....   |
| gi 15607823       | 30S ribosomal protein S7 RpsG                                                                                                                                                                | SRQRREKTMIERL            | ....EK.....   |
| gi 15609976       | Probable translation initiation factor if-2 InfB                                                                                                                                             | ASLRREKDDVTEV            | ....EK.....   |
| gi 15607208       | Probable isocitrate dehydrogenase [NADP] Icd2 (oxalosuccinate decarboxylase) (IDH) (NADP+-specific ICDH) (IDP)                                                                               | PKTDQEKAIKERY            | ....EK.....   |
| gi 15607491       | Probable chaperone protein DnaK (heat shock protein 70) (heat shock 70 kDa protein) (HSP70)                                                                                                  | GLDKGEKEQRILV            | ....EK.....   |
| gi 15610166       | Probable electron transfer flavoprotein (beta-subunit) FixA (beta-ETF) (electron transfer flavoprotein small subunit) (ETFSS)                                                                | AKTAGEKVTDEGE            | ....EK.....   |
| gi 15610937       | Fatty-acid-AMP ligase FadD32 (fatty-acid-AMP synthetase) (fatty-acid-AMP synthase). Also shown to have acyl-ACP ligase activity                                                              | LVRHVEKWAKVRG            | ....EK.....   |
| gi 57117131       | Probable ATP-dependent protease ATP-binding subunit ClpC1                                                                                                                                    | PVIGREKEIERVM            | ....EK.....   |
| gi 15607808       | DNA-directed RNA polymerase (beta' chain) RpoC (transcriptase beta' chain) (RNA polymerase beta' subunit)                                                                                    | RTLKPEKDGLFCE            | ....EK.....   |
| gi 15608626       | Possible exported conserved protein                                                                                                                                                          | QAKAIEKTFAAIK            | ....EK.....   |
| gi 15608000       | Probable fatty oxidation protein FadB                                                                                                                                                        | AEAIVVEKMIELGR           | ....EK.....   |
| gi 15608468       | Probable glycogen phosphorylase GlgP                                                                                                                                                         | AYTAVEKLTPEEV            | ....EK.....   |
| gi 15607525       | Probable endopeptidase ATP binding protein (chain B) ClpB (ClpB protein) (heat shock protein F84.1)                                                                                          | RIPEVEKKLDAAL            | ....EK.....   |
| gi 15609298       | Conserved protein                                                                                                                                                                            | GLYVPEKTHVPIS            | ....EK.....   |
| gi 57116686       | 30S ribosomal protein S18-1 RpsR1                                                                                                                                                            | RRPAPEKPVKTRK            | ....EK.....   |
| gi 15609638       | Probable acetyl-/propionyl-coenzyme A carboxylase alpha chain (alpha subunit) AccA1: biotin carboxylase + biotin carboxyl carrier protein (BCCP)                                             | RVGAGEKLGFAQN            | ....EK.....   |
| gi 15607873       | Adenylate kinase Adk (ATP-AMP transphosphorylase)                                                                                                                                            | AVKLAELKGIPIQI           | ....EK.....   |
| gi 15607548       | F420-dependent glucose-6-phosphate dehydrogenase Fgd1                                                                                                                                        | EELYTEKLMPAVR            | ....EK.....   |
| gi 15608531       | Probable S-adenosylmethionine synthetase MetK (mat) (AdoMet synthetase) (methionine adenosyltransferase)                                                                                     | ADIDLEKTLDPDI            | ....EK.....   |
| gi 15608000       | Probable fatty oxidation protein FadB                                                                                                                                                        | EIKGKETSDEAL             | ....EK.....   |
| gi 15610019       | Ribosome recycling factor Frr (ribosome releasing factor) (RRF)                                                                                                                              | EVGRAEKDLDKTT            | ....EK.....   |
| gi 15608833       | Inorganic polyphosphate/ATP-NAD kinase PpnK (poly(P)/ATP NAD kinase)                                                                                                                         | TARRVEKVLGDNK            | ....EK.....   |
| gi 15609031       | Conserved hypothetical protein                                                                                                                                                               | QFTKVEKTATVIE            | ....EK.....   |
| gi 15607795       | Possible ribonucleotide-transport ATP-binding protein ABC transporter Mkl                                                                                                                    | GLGGDEKPKFPGEI           | ....EK.....   |
| gi 57116735       | Possible mycolic acid synthase UmaA                                                                                                                                                          | ADFSVEKVQLLQQ            | ....EK.....   |
| gi 15609658       | Probable bacterioferritin comigratory protein Bcp                                                                                                                                            | SPDKPEKLATFRD            | ....EK.....   |
| gi 15608000       | Probable fatty oxidation protein FadB                                                                                                                                                        | GKGYSEKLEAKAL            | ....EK.....   |
| gi 15610421       | (BCCP)                                                                                                                                                                                       | RIANGEKLDITED            | ....EK.....   |
| gi 15608262       | Probable 6-phosphogluconate dehydrogenase,decarboxylating Gnd2                                                                                                                               | DDLREKLLFKKG             | ....EK.....   |
| gi 15608876       | Conserved protein                                                                                                                                                                            | RLRWREKELVGVG            | ....EK.....   |
| gi 15607581       | 60 kDa chaperonin 2 GroEL2 (protein CPN60-2) (GroEL protein 2) (65 kDa antigen) (heat shock protein 65) (cell wall protein A) (antigen A)                                                    | SDYDREKLERLA             | ....EK.....   |
| gi 15608029       | Probable citrate synthase II CitA                                                                                                                                                            | ILDRGEKLMGFGH            | ....EK.....   |
| gi 15607581       | 60 kDa chaperonin 2 GroEL2 (protein CPN60-2) (GroEL protein 2) (65 kDa antigen) (heat shock protein 65) (cell wall protein A) (antigen A)                                                    | LKRGIEKAVEKVT            | ....EK.....   |
| gi 15609277       | Conserved protein TB18.6                                                                                                                                                                     | HAVKVEKLDLPED            | ....EK.....   |
| gi 15610198       | Probable acyl-CoA dehydrogenase FadE22                                                                                                                                                       | IERFVEKALRQQE            | ....EK.....   |
| gi 15610554       | 10 kDa chaperonin GroES (protein CPN10) (protein GroES) (BCG-a heat shock protein) (10 kDa antigen)                                                                                          | PDTAKEKPOEGTV            | ....EK.....   |
| gi 15608586       | Probable transaldolase Tal                                                                                                                                                                   | LAHETEKTIQQAI            | ....EK.....   |
| gi 15607491       | Probable chaperone protein DnaK (heat shock protein 70) (heat shock 70 kDa protein) (HSP70)                                                                                                  | LVYQTEKVFKEQR            | ....EK.....   |
| gi 15607411       | Probable fatty-acid-CoA ligase FadD2 (fatty-acid-CoA synthetase) (fatty-acid-CoA synthase)                                                                                                   | ILDQLEKTEPKPD            | ....EK.....   |
| gi 15608451       | Probable ATP synthase epsilon chain AtpC                                                                                                                                                     | VEREGEKDLRIAV            | ....EK.....   |
| gi 15610166       | Probable electron transfer flavoprotein (beta-subunit) FixA (beta-ETF) (electron transfer flavoprotein small subunit) (ETFSS)                                                                | ALQIREKEAADGI            | ....EK.....   |
| gi 15608234       | Possible acyl-[acyl-carrier protein] desaturase DesA2 (acyl-[ACP] desaturase) (stearoyl-ACP desaturase)                                                                                      | KGYRAEKYTQVET            | ....EK.....   |
| gi 15607384       | Probable acetyl-CoA acyltransferase FadA2 (3-ketoacyl-CoA thiolase) (beta-ketothiolase)                                                                                                      | PNSSVEKLATLRP            | ....EK.....   |
| gi 15610410       | Probable acyl-CoA dehydrogenase FadE25                                                                                                                                                       | AAEVDEKARFPEE            | ....EK.....   |
| gi 15610416       | Probable propionyl-CoA carboxylase beta chain 5 AccD5 (pccase) (propanoyl-CoA:carbon dioxide ligase)                                                                                         | GEDAVEKVHAKGK            | ....EK.....   |
| gi 15610447       | Conserved protein                                                                                                                                                                            | AVREWEKLERFVE            | ....EK.....   |
| gi 15609751       | Probable threonyl-tRNA synthetase ThrS (threonine-tRNA synthetase)(ThrRS) (threonine-tRNA ligase)                                                                                            | TVYRYEKSGVVHG            | ....EK.....   |
| gi 15610985       | ESX-1 transcriptional regulatory protein EspR                                                                                                                                                | DDEYYEKLDKELQ            | ....EK.....   |
| gi 15609357       | Glutamine synthetase GlnA1 (glutamine synthase) (GS-I)                                                                                                                                       | KLAKDEKVEYVDV            | ....EK.....   |
| gi 15607776       | (3R)-hydroxyacyl-ACP dehydratase subunit HadB                                                                                                                                                | GDQLPEKTYPLTR            | ....EK.....   |
| gi 15610553       | 60 kDa chaperonin 1 GroEL1 (protein CPN60-1) (GroEL protein 1)                                                                                                                               | SDWDREKLGGERLA           | ....EK.....   |
| gi 15608531       | Probable S-adenosylmethionine synthetase MetK (mat) (AdoMet synthetase) (methionine adenosyltransferase)                                                                                     | DPDIREKVLNTVL            | ....EK.....   |
| gi 57117019       | Conserved 35 kDa alanine rich protein                                                                                                                                                        | QLADIEKLVQNVNR           | ....EK.....   |
| gi 15610384       | Probable adenosylhomocysteinase SahH (S-adenosyl-L-homocysteine hydrolase) (adohcayase)                                                                                                      | PKHLDEKVARIIHV           | ....EK.....   |
| gi 15609902       | Probable alanine rich hydrolase                                                                                                                                                              | TADHAEKLDKAFS            | ....EK.....   |

|             |                                                                                                                                          |                |             |
|-------------|------------------------------------------------------------------------------------------------------------------------------------------|----------------|-------------|
| gi 15609692 | Probable alanyl-tRNA synthetase AlaS (alanine--tRNA ligase) (alanine transase) (ALARS)                                                   | RLRAAEKELERVR  | ....EK..... |
| gi 15608000 | Probable fatty oxidation protein FadB                                                                                                    | DRLVAEKDSITGV  | ....EK..... |
| gi 15608432 | Probable arginyl-tRNA synthetase ArgS (ARGRS) (arginine--tRNA ligase)                                                                    | TGNIYEKDGATWL  | ....EK..... |
| gi 15610269 | Two component transcriptional regulatory protein DevR (probably LuxR/UhpA-family)                                                        | RMFLAEKTVKNYV  | ....EK..... |
| gi 15607603 | Dihydrolipoamide dehydrogenase LpdC (lipoamide reductase (NADH)) (lipoyl dehydrogenase) (dihydrolipoyl dehydrogenase) (diaphorase)       | VSKEIEKQFKKLG  | ....EK..... |
| gi 57117051 | Ribonucleoside-diphosphate reductase (beta chain) NrdF2 (ribonucleotide reductase small subunit) (R2F protein)                           | NRLQDEKDAEVWD  | ....EK..... |
| gi 15608111 | Probable enoyl-CoA hydratase EchA7 (enoyl hydratase) (unsaturated acyl-CoA hydratase) (crotonase)                                        | YYLTGEEKFGAREA | ....EK..... |
| gi 15608450 | Probable ATP synthase beta chain AtpD                                                                                                    | MTTTAEKTRPGK   | ....EK..... |
| gi 15610913 | Probable oxidoreductase                                                                                                                  | TAGSPEKLELCRD  | ....EK..... |
| gi 15609613 | Probable NAD-dependent glutamate dehydrogenase Gdh (NAD-Gdh) (NAD-dependent glutamic dehydrogenase)                                      | EALPSEKEIARRS  | ....EK..... |
| gi 15608519 | Probable pyrimidine operon regulatory protein PyrR                                                                                       | AHQIIEKTALDDP  | ....EK..... |
| gi 15607525 | Probable endopeptidase ATP binding protein (chain B) ClpB (ClpB protein) (heat shock protein F84.1)                                      | YRKHIEKDAALER  | ....EK..... |
| gi 15607955 | Probable thiosulfate sulfurtransferase CysA2 (rhodanese-like protein) (thiosulfate cyanide transsulfurase) (thiosulfate thiotransferase) | KLYGHEKVKLLDG  | ....EK..... |
| gi 15609045 | Catalase-peroxidase-peroxynitritase T KatG                                                                                               | GCAAIEKAAKAAG  | ....EK..... |
| gi 15609359 | Probable glutamine synthetase GlnA2 (glutamine synthase) (GS-II)                                                                         | GLRGVEKGYVLGP  | ....EK..... |
| gi 15610410 | Probable acyl-CoA dehydrogenase FadE25                                                                                                   | IRALAEKEIAPHA  | ....EK..... |
| gi 15609348 | Probable aminomethyltransferase GcvT (glycine cleavage system T protein)                                                                 | AALLAEKAAGPRR  | ....EK..... |
| gi 15608613 | Probable iron-regulated aconitate hydratase Acn (citrate hydro-lyase) (aconitase)                                                        | TLKVGESYQIYR   | ....EK..... |
| gi 15610188 | Ribonucleoside-diphosphate reductase (alpha chain) NrdE (ribonucleotide reductase small subunit) (R1F protein)                           | RENADEKIRIKTL  | ....EK..... |
| gi 15608974 | Malate synthase G GlcB                                                                                                                   | KARAAEKPAASDR  | ....EK..... |
| gi 15607412 | Probable acyl-CoA dehydrogenase FadE6                                                                                                    | LDPSTEKLRQIR   | ....EK..... |
| gi 15609220 | Conserved hypothetical protein                                                                                                           | EGSGQEKPVKRL   | ....EK..... |
| gi 15607195 | 30S ribosomal protein S6 RpsF                                                                                                            | DGGKVEKVDIWGK  | ....EK..... |
| gi 15607383 | Probable 3-oxoacyl-[acyl-carrier protein] reductase FabG4 (3-ketoacyl-acyl carrier protein reductase)                                    | LRAALEKDYDLVG  | ....EK..... |
| gi 15608203 | Conserved hypothetical protein                                                                                                           | GILRAEKILDAVR  | ....EK..... |
| gi 15608613 | Probable iron-regulated aconitate hydratase Acn (citrate hydro-lyase) (aconitase)                                                        | ARNAVEKGLTSKP  | ....EK..... |
| gi 15607845 | 30S ribosomal protein S19 RpsS                                                                                                           | VDVQNEKNTKQVI  | ....EK..... |
| gi 15608092 | Probable succinyl-CoA synthetase (alpha chain) SucD (SCS-alpha)                                                                          | VAEAMEKTGADVS  | ....EK..... |
| gi 15608527 | Putative integration host factor MihF                                                                                                    | RAAALEKAAAARR  | ....EK..... |
| gi 15609614 | Probable macrolide-transport ATP-binding protein ABC transporter                                                                         | YSTYLEKKAERLA  | ....EK..... |
| gi 15610692 | Probable acetyl-CoA acetyltransferase FadA6 (acetoacetyl-CoA thiolase)                                                                   | SELIAEKWNLSRE  | ....EK..... |
| gi 15608450 | Probable ATP synthase beta chain AtpD                                                                                                    | EPGYGEKFEHWSI  | ....EK..... |
| gi 15608621 | 3-oxoacyl-[acyl-carrier protein] reductase FabG1 (3-ketoacyl-acyl carrier protein reductase) (mycolic acid biosynthesis a protein)       | MRMTEKFEKVIN   | ....EK..... |

Parameters for this run:

fgtype = 'prealigned'  
fgcentralres = 'K'  
width = '13'  
occurrences = '20'  
significance = '0.000001'  
bgdb = 'uploaded'  
bgfile = 'K.out'  
bgtype = 'prealigned'  
bgcentralres = 'K'

| Motif       | Motif Score | Foreground Size | Background Mat | Background Size | Fold Increase |
|-------------|-------------|-----------------|----------------|-----------------|---------------|
| ....EK..... | 7.26        | 1500            | 1357           | 25575           | 1.63          |

Table S5B. The list of succinylated protein surface accessibility and secondary structure predictions.

| Class assignment - B for buried or E for Exposed - Threshold: 25% exposure, but not based on RSA | Amino acid | Sequence name | Amino acid number | Relative Surface Accessibility - RSA | Absolute Surface Accessibility | Z-fit score for RSA prediction | Probability for Alpha-Helix | Probability for Beta-strand | Probability for Coil |
|--------------------------------------------------------------------------------------------------|------------|---------------|-------------------|--------------------------------------|--------------------------------|--------------------------------|-----------------------------|-----------------------------|----------------------|
| E                                                                                                | K          | gii15607144   | 96                | 0.503                                | 103.405                        | -0.379                         | 0.004                       | 0.085                       | 0.91                 |
| B                                                                                                | K          | gii15607144   | 247               | 0.153                                | 31.472                         | 0.354                          | 0.001                       | 0.9                         | 0.099                |
| E                                                                                                | K          | gii15607144   | 260               | 0.551                                | 113.258                        | 1.331                          | 0.053                       | 0.043                       | 0.903                |
| E                                                                                                | K          | gii15607144   | 236               | 0.431                                | 88.616                         | -0.913                         | 0.004                       | 0.514                       | 0.481                |
| E                                                                                                | K          | gii15607144   | 216               | 0.499                                | 102.603                        | 1.449                          | 0.923                       | 0.002                       | 0.076                |
| E                                                                                                | K          | gii15607148   | 325               | 0.651                                | 133.993                        | 1.362                          | 0.97                        | 0.001                       | 0.03                 |
| E                                                                                                | K          | gii15607148   | 49                | 0.329                                | 67.696                         | 0.78                           | 0.113                       | 0.043                       | 0.844                |
| E                                                                                                | K          | gii15607148   | 224               | 0.398                                | 81.827                         | -0.687                         | 0.053                       | 0.043                       | 0.903                |
| E                                                                                                | K          | gii15607148   | 245               | 0.602                                | 123.893                        | 0.053                          | 0.169                       | 0.612                       | 0.219                |
| B                                                                                                | K          | gii15607151   | 27                | 0.209                                | 43.032                         | 1.837                          | 0.001                       | 0.959                       | 0.04                 |
| E                                                                                                | K          | gii15607151   | 37                | 0.33                                 | 67.943                         | 1.2                            | 0.717                       | 0.014                       | 0.269                |
| E                                                                                                | K          | gii15607186   | 152               | 0.545                                | 112.024                        | 0.257                          | 0.005                       | 0.262                       | 0.733                |
| E                                                                                                | K          | gii15607186   | 118               | 0.308                                | 63.417                         | -0.321                         | 0.053                       | 0.005                       | 0.942                |
| E                                                                                                | K          | gii15607195   | 39                | 0.545                                | 112.004                        | 1.478                          | 0.001                       | 0.959                       | 0.04                 |
| E                                                                                                | K          | gii15607195   | 66                | 0.391                                | 80.49                          | 0.848                          | 0.002                       | 0.816                       | 0.182                |
| E                                                                                                | K          | gii15607196   | 116               | 0.561                                | 115.357                        | -0.67                          | 0.113                       | 0.043                       | 0.844                |
| E                                                                                                | K          | gii15607198   | 106               | 0.754                                | 155.077                        | 1.836                          | 0.923                       | 0.002                       | 0.076                |
| E                                                                                                | K          | gii15607201   | 6                 | 0.463                                | 95.177                         | 0.478                          | 0.02                        | 0.205                       | 0.775                |
| E                                                                                                | K          | gii15607208   | 38                | 0.525                                | 107.972                        | 0.861                          | 0.021                       | 0.756                       | 0.223                |
| E                                                                                                | K          | gii15607208   | 630               | 0.365                                | 75.122                         | 1.923                          | 0.938                       | 0.007                       | 0.055                |
| E                                                                                                | K          | gii15607208   | 634               | 0.491                                | 101.06                         | 1.729                          | 0.97                        | 0.001                       | 0.03                 |
| E                                                                                                | K          | gii15607208   | 262               | 0.302                                | 62.183                         | 0.233                          | 0.074                       | 0.484                       | 0.442                |
| E                                                                                                | K          | gii15607208   | 474               | 0.42                                 | 86.332                         | 1.607                          | 0.975                       | 0.003                       | 0.022                |
| E                                                                                                | K          | gii15607208   | 117               | 0.63                                 | 129.55                         | 0.371                          | 0.109                       | 0.005                       | 0.886                |
| E                                                                                                | K          | gii15607208   | 122               | 0.484                                | 99.518                         | 0.806                          | 0.923                       | 0.002                       | 0.076                |
| E                                                                                                | K          | gii15607208   | 594               | 0.407                                | 83.72                          | 1.225                          | 0.938                       | 0.007                       | 0.055                |
| E                                                                                                | K          | gii15607208   | 278               | 0.406                                | 83.535                         | 1.773                          | 0.97                        | 0.001                       | 0.03                 |
| E                                                                                                | K          | gii15607208   | 653               | 0.509                                | 104.701                        | 0.079                          | 0.113                       | 0.087                       | 0.8                  |
| E                                                                                                | K          | gii15607208   | 506               | 0.388                                | 79.894                         | 1.71                           | 0.97                        | 0.001                       | 0.03                 |
| E                                                                                                | K          | gii15607208   | 510               | 0.646                                | 132.882                        | 1.441                          | 0.502                       | 0.002                       | 0.495                |
| E                                                                                                | K          | gii15607208   | 648               | 0.4                                  | 82.239                         | -0.065                         | 0.018                       | 0.019                       | 0.964                |
| E                                                                                                | K          | gii15607208   | 100               | 0.483                                | 99.394                         | 1.711                          | 0.97                        | 0.001                       | 0.03                 |
| E                                                                                                | K          | gii15607208   | 205               | 0.717                                | 147.405                        | 0.228                          | 0.005                       | 0.045                       | 0.951                |
| E                                                                                                | K          | gii15607208   | 208               | 0.555                                | 114.143                        | 0.923                          | 0.021                       | 0.279                       | 0.699                |
| E                                                                                                | K          | gii15607208   | 591               | 0.504                                | 103.693                        | 0.659                          | 0.782                       | 0.003                       | 0.216                |
| E                                                                                                | K          | gii15607208   | 371               | 0.585                                | 120.396                        | 0.795                          | 0.053                       | 0.043                       | 0.903                |
| E                                                                                                | K          | gii15607223   | 15                | 0.387                                | 79.544                         | 1.423                          | 0.879                       | 0.01                        | 0.111                |
| E                                                                                                | K          | gii15607230   | 115               | 0.62                                 | 127.596                        | -0.084                         | 0.021                       | 0.279                       | 0.699                |
| E                                                                                                | K          | gii15607230   | 147               | 0.399                                | 82.074                         | 1.498                          | 0.005                       | 0.262                       | 0.733                |
| E                                                                                                | K          | gii15607261   | 509               | 0.392                                | 80.696                         | -1.564                         | 0.257                       | 0.016                       | 0.727                |
| E                                                                                                | K          | gii15607269   | 34                | 0.377                                | 77.569                         | 1.421                          | 0.001                       | 0.959                       | 0.04                 |
| B                                                                                                | K          | gii15607273   | 352               | 0.039                                | 7.94                           | 0.268                          | 0.97                        | 0.001                       | 0.03                 |
| B                                                                                                | K          | gii15607279   | 104               | 0.202                                | 41.593                         | 1.815                          | 0.97                        | 0.001                       | 0.03                 |
| E                                                                                                | K          | gii15607283   | 50                | 0.608                                | 125.127                        | 0.695                          | 0.923                       | 0.002                       | 0.076                |
| E                                                                                                | K          | gii15607290   | 110               | 0.627                                | 128.974                        | 1.301                          | 0.053                       | 0.043                       | 0.903                |
| E                                                                                                | K          | gii15607290   | 184               | 0.658                                | 135.371                        | 0.745                          | 0.109                       | 0.005                       | 0.886                |
| E                                                                                                | K          | gii15607290   | 259               | 0.691                                | 142.036                        | -0.891                         | 0.005                       | 0.015                       | 0.979                |
| E                                                                                                | K          | gii15607291   | 247               | 0.314                                | 64.672                         | 0.157                          | 0.181                       | 0.016                       | 0.803                |
| E                                                                                                | K          | gii15607296   | 323               | 0.544                                | 111.88                         | 0.239                          | 0.115                       | 0.016                       | 0.868                |
| E                                                                                                | K          | gii15607296   | 124               | 0.456                                | 93.82                          | 0.136                          | 0.191                       | 0.086                       | 0.723                |
| B                                                                                                | K          | gii15607296   | 312               | 0.183                                | 37.664                         | 1.067                          | 0.97                        | 0.001                       | 0.03                 |
| E                                                                                                | K          | gii15607297   | 29                | 0.677                                | 139.259                        | 1.06                           | 0.858                       | 0.002                       | 0.139                |
| E                                                                                                | K          | gii15607321   | 18                | 0.445                                | 91.557                         | 1.795                          | 0.97                        | 0.001                       | 0.03                 |
| E                                                                                                | K          | gii15607330   | 480               | 0.495                                | 101.78                         | 0.337                          | 0.018                       | 0.047                       | 0.935                |
| E                                                                                                | K          | gii15607331   | 82                | 0.248                                | 50.931                         | 1.618                          | 0.97                        | 0.001                       | 0.03                 |
| E                                                                                                | K          | gii15607352   | 169               | 0.427                                | 87.772                         | 1.584                          | 0.879                       | 0.01                        | 0.111                |
| E                                                                                                | K          | gii15607352   | 192               | 0.546                                | 112.312                        | -1.168                         | 0.019                       | 0.141                       | 0.84                 |
| E                                                                                                | K          | gii15607352   | 304               | 0.705                                | 145.08                         | -0.557                         | 0.018                       | 0.019                       | 0.964                |
| E                                                                                                | K          | gii15607352   | 492               | 0.433                                | 89.171                         | -0.002                         | 0.018                       | 0.019                       | 0.964                |
| E                                                                                                | K          | gii15607352   | 67                | 0.564                                | 116.077                        | -0.434                         | 0.018                       | 0.019                       | 0.964                |
| E                                                                                                | K          | gii15607352   | 422               | 0.42                                 | 86.332                         | -0.837                         | 0.018                       | 0.019                       | 0.964                |
| E                                                                                                | K          | gii15607352   | 602               | 0.396                                | 81.457                         | 1.399                          | 0.923                       | 0.002                       | 0.076                |
| E                                                                                                | K          | gii15607352   | 164               | 0.248                                | 51.014                         | 0.734                          | 0.858                       | 0.002                       | 0.139                |
| E                                                                                                | K          | gii15607352   | 113               | 0.375                                | 77.137                         | 1.516                          | 0.923                       | 0.002                       | 0.076                |
| B                                                                                                | K          | gii15607357   | 89                | 0.061                                | 12.63                          | -1.324                         | 0.021                       | 0.756                       | 0.223                |
| E                                                                                                | K          | gii15607362   | 249               | 0.352                                | 72.406                         | 2.083                          | 0.97                        | 0.001                       | 0.03                 |
| E                                                                                                | K          | gii15607363   | 33                | 0.3                                  | 61.772                         | 0.876                          | 0.181                       | 0.016                       | 0.803                |
| B                                                                                                | K          | gii15607363   | 138               | 0.23                                 | 47.352                         | -0.429                         | 0.199                       | 0.152                       | 0.649                |
| E                                                                                                | K          | gii15607363   | 31                | 0.644                                | 132.533                        | 0.621                          | 0.246                       | 0.004                       | 0.75                 |
| E                                                                                                | K          | gii15607364   | 10                | 0.323                                | 66.421                         | 0.889                          | 0.056                       | 0.142                       | 0.802                |
| E                                                                                                | K          | gii15607372   | 355               | 0.299                                | 61.504                         | 0.314                          | 0.181                       | 0.016                       | 0.803                |
| E                                                                                                | K          | gii15607372   | 424               | 0.393                                | 80.861                         | 0.152                          | 0.148                       | 0.418                       | 0.435                |
| B                                                                                                | K          | gii15607382   | 240               | 0.278                                | 57.102                         | -0.62                          | 0.004                       | 0.42                        | 0.576                |
| E                                                                                                | K          | gii15607382   | 268               | 0.655                                | 134.754                        | 0.233                          | 0.005                       | 0.015                       | 0.979                |
| E                                                                                                | K          | gii15607382   | 158               | 0.55                                 | 113.053                        | -0.482                         | 0.053                       | 0.043                       | 0.903                |
| E                                                                                                | K          | gii15607383   | 66                | 0.473                                | 97.214                         | 0.801                          | 0.782                       | 0.003                       | 0.216                |
| E                                                                                                | K          | gii15607383   | 288               | 0.328                                | 67.408                         | 1.21                           | 0.004                       | 0.085                       | 0.91                 |
| E                                                                                                | K          | gii15607383   | 302               | 0.302                                | 62.039                         | 0.297                          | 0.115                       | 0.016                       | 0.868                |
| E                                                                                                | K          | gii15607384   | 245               | 0.416                                | 85.633                         | 0.402                          | 0.802                       | 0.014                       | 0.185                |
| E                                                                                                | K          | gii15607384   | 415               | 0.366                                | 75.307                         | -0.349                         | 0.113                       | 0.087                       | 0.8                  |
| B                                                                                                | K          | gii15607384   | 378               | 0.179                                | 36.882                         | 0.455                          | 0.022                       | 0.359                       | 0.619                |
| E                                                                                                | K          | gii15607384   | 192               | 0.664                                | 136.503                        | 1.043                          | 0.923                       | 0.002                       | 0.076                |
| E                                                                                                | K          | gii15607384   | 146               | 0.517                                | 106.388                        | -0.927                         | 0.622                       | 0.015                       | 0.363                |
| E                                                                                                | K          | gii15607385   | 466               | 0.504                                | 103.714                        | -0.753                         | 0.406                       | 0.004                       | 0.59                 |
| E                                                                                                | K          | gii15607385   | 394               | 0.466                                | 95.815                         | 0.009                          | 0.522                       | 0.016                       | 0.462                |
| E                                                                                                | K          | gii15607385   | 179               | 0.356                                | 73.209                         | 1.561                          | 0.011                       | 0.918                       | 0.071                |
| E                                                                                                | K          | gii15607385   | 338               | 0.51                                 | 104.948                        | -1.383                         | 0.115                       | 0.016                       | 0.868                |
| E                                                                                                | K          | gii15607388   | 121               | 0.517                                | 106.326                        | -1.05                          | 0.052                       | 0.084                       | 0.864                |
| E                                                                                                | K          | gii15607389   | 68                | 0.48                                 | 98.818                         | 0.943                          | 0.97                        | 0.001                       | 0.03                 |
| B                                                                                                | K          | gii15607389   | 276               | 0.038                                | 7.899                          | 0.185                          | 0.001                       | 0.9                         | 0.099                |
| E                                                                                                | K          | gii15607389   | 79                | 0.44                                 | 90.529                         | -0.47                          | 0.176                       | 0.004                       | 0.82                 |
| E                                                                                                | K          | gii15607389   | 33                | 0.425                                | 87.402                         | 2.288                          | 0.005                       | 0.336                       | 0.66                 |
| E                                                                                                | K          | gii15607389   | 217               | 0.314                                | 64.61                          | -0.707                         | 0.113                       | 0.087                       | 0.8                  |
| B                                                                                                | K          | gii15607389   | 147               | 0.194                                | 39.803                         | 0.895                          | 0.97                        | 0.001                       | 0.03                 |
| E                                                                                                | K          | gii15607391   | 25                | 0.363                                | 74.71                          | 0.476                          | 0.879                       | 0.01                        | 0.111                |
| B                                                                                                | K          | gii15607407   | 887               | 0.183                                | 37.602                         | 1.396                          | 0.97                        | 0.001                       | 0.03                 |

|   |   |             |     |       |         |        |       |       |       |
|---|---|-------------|-----|-------|---------|--------|-------|-------|-------|
| E | K | gii15607411 | 295 | 0.466 | 95.877  | 1.4    | 0.003 | 0.003 | 0.994 |
| E | K | gii15607411 | 327 | 0.374 | 76.891  | -0.847 | 0.115 | 0.016 | 0.868 |
| E | K | gii15607412 | 384 | 0.671 | 138.107 | 0.904  | 0.053 | 0.005 | 0.942 |
| B | K | gii15607412 | 638 | 0.096 | 19.644  | 0.418  | 0.97  | 0.001 | 0.03  |
| B | K | gii15607412 | 695 | 0.249 | 51.24   | 0.368  | 0.858 | 0.002 | 0.139 |
| E | K | gii15607412 | 544 | 0.392 | 80.573  | 0.696  | 0.022 | 0.359 | 0.619 |
| B | K | gii15607412 | 431 | 0.105 | 21.598  | -2     | 0.257 | 0.016 | 0.727 |
| E | K | gii15607412 | 371 | 0.389 | 80.017  | -0.27  | 0.257 | 0.016 | 0.727 |
| B | K | gii15607413 | 275 | 0.18  | 37.005  | 0.038  | 0.135 | 0.317 | 0.548 |
| E | K | gii15607434 | 363 | 0.645 | 132.759 | 2.052  | 0.923 | 0.002 | 0.076 |
| B | K | gii15607456 | 85  | 0.255 | 52.433  | -2.247 | 0.018 | 0.088 | 0.893 |
| E | K | gii15607473 | 216 | 0.499 | 102.583 | 1.059  | 0.018 | 0.088 | 0.893 |
| E | K | gii15607473 | 80  | 0.554 | 113.958 | -0.524 | 0.115 | 0.016 | 0.868 |
| E | K | gii15607474 | 75  | 0.461 | 94.848  | -0.031 | 0.023 | 0.655 | 0.322 |
| E | K | gii15607475 | 274 | 0.618 | 127.04  | -0.842 | 0.018 | 0.088 | 0.893 |
| E | K | gii15607475 | 246 | 0.461 | 94.787  | 0.743  | 0.004 | 0.514 | 0.481 |
| B | K | gii15607488 | 97  | 0.19  | 39.062  | 1.209  | 0.97  | 0.001 | 0.03  |
| E | K | gii15607491 | 564 | 0.432 | 88.945  | 2.059  | 0.97  | 0.001 | 0.03  |
| E | K | gii15607491 | 465 | 0.418 | 86.065  | 0.075  | 0.021 | 0.451 | 0.528 |
| E | K | gii15607491 | 469 | 0.419 | 86.229  | -0.745 | 0.004 | 0.616 | 0.381 |
| E | K | gii15607491 | 228 | 0.521 | 107.211 | -0.474 | 0.923 | 0.002 | 0.076 |
| E | K | gii15607491 | 535 | 0.383 | 78.824  | 0.07   | 0.058 | 0.017 | 0.925 |
| E | K | gii15607491 | 543 | 0.432 | 88.883  | 2.408  | 0.97  | 0.001 | 0.03  |
| E | K | gii15607491 | 333 | 0.476 | 97.81   | -0.638 | 0.018 | 0.047 | 0.935 |
| E | K | gii15607491 | 337 | 0.414 | 85.119  | -0.813 | 0.004 | 0.197 | 0.799 |
| E | K | gii15607491 | 217 | 0.428 | 88.019  | 0.438  | 0.858 | 0.002 | 0.139 |
| E | K | gii15607491 | 226 | 0.508 | 104.578 | -0.924 | 0.181 | 0.016 | 0.803 |
| E | K | gii15607491 | 525 | 0.563 | 115.891 | 0.855  | 0.694 | 0.003 | 0.303 |
| E | K | gii15607491 | 84  | 0.45  | 92.668  | -0.057 | 0.021 | 0.451 | 0.528 |
| E | K | gii15607491 | 85  | 0.521 | 107.211 | -0.117 | 0.004 | 0.616 | 0.381 |
| E | K | gii15607491 | 98  | 0.283 | 58.193  | 1.997  | 0.988 | 0     | 0.012 |
| E | K | gii15607491 | 483 | 0.468 | 96.37   | -0.522 | 0.858 | 0.002 | 0.139 |
| E | K | gii15607491 | 159 | 0.468 | 96.309  | -0.276 | 0.181 | 0.016 | 0.803 |
| E | K | gii15607491 | 162 | 0.367 | 75.451  | -0.594 | 0.018 | 0.088 | 0.893 |
| E | K | gii15607491 | 491 | 0.567 | 116.55  | 1.145  | 0.923 | 0.002 | 0.076 |
| E | K | gii15607491 | 327 | 0.364 | 74.978  | 1.037  | 0.97  | 0.001 | 0.03  |
| B | K | gii15607491 | 55  | 0.223 | 45.789  | 1.138  | 0.975 | 0.003 | 0.022 |
| E | K | gii15607491 | 522 | 0.617 | 126.896 | 1.382  | 0.923 | 0.002 | 0.076 |
| E | K | gii15607491 | 131 | 0.259 | 53.194  | 1.315  | 0.97  | 0.001 | 0.03  |
| E | K | gii15607491 | 215 | 0.464 | 95.527  | 1.522  | 0.97  | 0.001 | 0.03  |
| B | K | gii15607492 | 88  | 0.102 | 21.043  | 0.057  | 0.97  | 0.001 | 0.03  |
| E | K | gii15607492 | 107 | 0.692 | 142.324 | 1.01   | 0.782 | 0.003 | 0.216 |
| E | K | gii15607492 | 7   | 0.649 | 133.438 | 0.925  | 0.115 | 0.016 | 0.868 |
| B | K | gii15607498 | 198 | 0.198 | 40.626  | 1.189  | 0.782 | 0.003 | 0.216 |
| E | K | gii15607498 | 393 | 0.383 | 78.886  | 1.454  | 0.97  | 0.001 | 0.03  |
| E | K | gii15607498 | 174 | 0.613 | 126.094 | 0.678  | 0.694 | 0.003 | 0.303 |
| B | K | gii15607498 | 168 | 0.096 | 19.747  | 0.769  | 0.923 | 0.002 | 0.076 |
| E | K | gii15607504 | 101 | 0.604 | 124.222 | -1.108 | 0.321 | 0.003 | 0.675 |
| E | K | gii15607504 | 149 | 0.575 | 118.38  | 1.905  | 0.97  | 0.001 | 0.03  |
| E | K | gii15607504 | 319 | 0.358 | 73.62   | 1.49   | 0.97  | 0.001 | 0.03  |
| E | K | gii15607504 | 309 | 0.494 | 101.534 | -0.531 | 0.191 | 0.086 | 0.723 |
| E | K | gii15607504 | 245 | 0.304 | 62.615  | -0.435 | 0.053 | 0.043 | 0.903 |
| E | K | gii15607504 | 259 | 0.499 | 102.685 | 0.438  | 0.923 | 0.002 | 0.076 |
| E | K | gii15607504 | 189 | 0.498 | 102.377 | 2.075  | 0.988 | 0     | 0.012 |
| B | K | gii15607504 | 201 | 0.153 | 31.534  | 0.575  | 0.113 | 0.043 | 0.844 |
| E | K | gii15607504 | 216 | 0.518 | 106.553 | 0.511  | 0.018 | 0.047 | 0.935 |
| E | K | gii15607504 | 221 | 0.592 | 121.795 | 0.692  | 0.019 | 0.141 | 0.84  |
| E | K | gii15607504 | 119 | 0.471 | 96.802  | 1.618  | 0.923 | 0.002 | 0.076 |
| E | K | gii15607504 | 99  | 0.417 | 85.859  | -0.505 | 0.053 | 0.005 | 0.942 |
| E | K | gii15607506 | 169 | 0.411 | 84.563  | 1.39   | 0.6   | 0.003 | 0.397 |
| E | K | gii15607525 | 740 | 0.474 | 97.564  | 1.325  | 0.016 | 0.005 | 0.979 |
| E | K | gii15607525 | 326 | 0.462 | 94.951  | 0.495  | 0.622 | 0.015 | 0.363 |
| E | K | gii15607525 | 512 | 0.671 | 138.107 | 1.4    | 0.97  | 0.001 | 0.03  |
| E | K | gii15607525 | 774 | 0.634 | 130.496 | 1.441  | 0.97  | 0.001 | 0.03  |
| B | K | gii15607525 | 790 | 0.08  | 16.477  | 1.205  | 0.975 | 0.003 | 0.022 |
| E | K | gii15607525 | 618 | 0.302 | 62.183  | 1.466  | 0.988 | 0     | 0.012 |
| E | K | gii15607525 | 576 | 0.707 | 145.471 | 1.195  | 0.858 | 0.002 | 0.139 |
| E | K | gii15607530 | 281 | 0.603 | 123.975 | 1.627  | 0.923 | 0.002 | 0.076 |
| E | K | gii15607532 | 311 | 0.33  | 67.963  | 1.122  | 0.938 | 0.007 | 0.055 |
| E | K | gii15607535 | 134 | 0.609 | 125.292 | -0.12  | 0.321 | 0.003 | 0.675 |
| E | K | gii15607541 | 340 | 0.344 | 70.781  | 1.915  | 0.988 | 0     | 0.012 |
| E | K | gii15607548 | 198 | 0.303 | 62.409  | -1.654 | 0.018 | 0.019 | 0.964 |
| E | K | gii15607548 | 206 | 0.458 | 94.272  | 1.156  | 0.97  | 0.001 | 0.03  |
| E | K | gii15607548 | 183 | 0.345 | 70.905  | 1.44   | 0.97  | 0.001 | 0.03  |
| E | K | gii15607549 | 454 | 0.466 | 95.774  | 0.245  | 0.053 | 0.005 | 0.942 |
| E | K | gii15607549 | 452 | 0.679 | 139.67  | 0.646  | 0.694 | 0.003 | 0.303 |
| E | K | gii15607551 | 520 | 0.509 | 104.722 | 0.402  | 0.522 | 0.016 | 0.462 |
| E | K | gii15607551 | 524 | 0.266 | 54.696  | 0.629  | 0.717 | 0.014 | 0.269 |
| E | K | gii15607563 | 163 | 0.456 | 93.881  | 2.275  | 0.97  | 0.001 | 0.03  |
| E | K | gii15607564 | 211 | 0.641 | 131.874 | 0.313  | 0.321 | 0.003 | 0.675 |
| B | K | gii15607573 | 230 | 0.269 | 55.374  | -0.016 | 0.018 | 0.088 | 0.893 |
| B | K | gii15607580 | 206 | 0.215 | 44.287  | 0.017  | 0.005 | 0.015 | 0.979 |
| E | K | gii15607580 | 291 | 0.585 | 120.396 | 1.129  | 0.923 | 0.002 | 0.076 |
| E | K | gii15607581 | 388 | 0.504 | 103.57  | 1.117  | 0.97  | 0.001 | 0.03  |
| E | K | gii15607581 | 391 | 0.265 | 54.593  | 0.924  | 0.97  | 0.001 | 0.03  |
| E | K | gii15607581 | 3   | 0.557 | 114.493 | 0.282  | 0.502 | 0.102 | 0.396 |
| E | K | gii15607581 | 125 | 0.269 | 55.23   | 1.338  | 0.97  | 0.001 | 0.03  |
| E | K | gii15607581 | 132 | 0.671 | 138.004 | 1.093  | 0.879 | 0.01  | 0.111 |
| E | K | gii15607581 | 67  | 0.419 | 86.147  | -0.037 | 0.923 | 0.002 | 0.076 |
| B | K | gii15607581 | 74  | 0.173 | 35.504  | 1.106  | 0.988 | 0     | 0.012 |
| E | K | gii15607581 | 526 | 0.694 | 142.735 | 0.582  | 0.058 | 0.017 | 0.925 |
| B | K | gii15607581 | 362 | 0.205 | 42.21   | 1.615  | 0.011 | 0.918 | 0.071 |
| E | K | gii15607581 | 78  | 0.479 | 98.53   | 1.071  | 0.923 | 0.002 | 0.076 |
| E | K | gii15607581 | 79  | 0.382 | 78.495  | 0.54   | 0.802 | 0.014 | 0.185 |
| E | K | gii15607581 | 140 | 0.432 | 88.78   | 0.589  | 0.923 | 0.002 | 0.076 |
| E | K | gii15607581 | 195 | 0.452 | 92.894  | -0.581 | 0.022 | 0.359 | 0.619 |
| E | K | gii15607581 | 224 | 0.55  | 113.156 | -0.556 | 0.022 | 0.359 | 0.619 |
| E | K | gii15607581 | 121 | 0.331 | 68.128  | 1.89   | 0.97  | 0.001 | 0.03  |
| E | K | gii15607581 | 27  | 0.379 | 78.001  | 0.8    | 0.879 | 0.01  | 0.111 |
| E | K | gii15607581 | 33  | 0.473 | 97.255  | -0.454 | 0.058 | 0.017 | 0.925 |
| E | K | gii15607581 | 41  | 0.376 | 77.425  | 0.845  | 0.021 | 0.279 | 0.699 |

|   |   |             |      |       |         |        |       |       |       |
|---|---|-------------|------|-------|---------|--------|-------|-------|-------|
| E | K | gii15607581 | 42   | 0.631 | 129.714 | -1.249 | 0.018 | 0.019 | 0.964 |
| E | K | gii15607581 | 270  | 0.378 | 77.816  | 0.702  | 0.018 | 0.088 | 0.893 |
| E | K | gii15607581 | 275  | 0.286 | 58.768  | -0.02  | 0.004 | 0.616 | 0.381 |
| E | K | gii15607581 | 229  | 0.509 | 104.701 | -0.729 | 0.184 | 0.043 | 0.773 |
| E | K | gii15607581 | 284  | 0.329 | 67.716  | 0.367  | 0.858 | 0.002 | 0.139 |
| E | K | gii15607581 | 320  | 0.33  | 67.819  | -0.595 | 0.004 | 0.616 | 0.381 |
| E | K | gii15607581 | 325  | 0.507 | 104.187 | -0.914 | 0.02  | 0.205 | 0.775 |
| E | K | gii15607581 | 57   | 0.422 | 86.826  | 1.377  | 0.779 | 0.1   | 0.12  |
| B | K | gii15607581 | 378  | 0.093 | 19.11   | 0.152  | 0.001 | 0.959 | 0.04  |
| E | K | gii15607581 | 369  | 0.621 | 127.637 | -0.858 | 0.004 | 0.197 | 0.799 |
| B | K | gii15607581 | 441  | 0.073 | 15.016  | 0.116  | 0.988 | 0     | 0.012 |
| E | K | gii15607581 | 449  | 0.285 | 58.686  | 0.785  | 0.97  | 0.001 | 0.03  |
| B | K | gii15607581 | 402  | 0.227 | 46.756  | 1.187  | 0.988 | 0     | 0.012 |
| E | K | gii15607581 | 495  | 0.293 | 60.332  | 1.017  | 0.97  | 0.001 | 0.03  |
| B | K | gii15607581 | 116  | 0.141 | 29.086  | 0.633  | 0.975 | 0.003 | 0.022 |
| E | K | gii15607581 | 465  | 0.372 | 76.5    | 2.111  | 0.97  | 0.001 | 0.03  |
| E | K | gii15607581 | 521  | 0.29  | 59.632  | 1.285  | 0.191 | 0.086 | 0.723 |
| E | K | gii15607581 | 243  | 0.416 | 85.653  | 0.905  | 0.43  | 0.016 | 0.555 |
| E | K | gii15607581 | 264  | 0.285 | 58.707  | 0.87   | 0.923 | 0.002 | 0.076 |
| E | K | gii15607586 | 135  | 0.604 | 124.243 | 1.473  | 0.694 | 0.003 | 0.303 |
| E | K | gii15607598 | 33   | 0.581 | 119.491 | 1.694  | 0.97  | 0.001 | 0.03  |
| E | K | gii15607603 | 216  | 0.55  | 113.217 | 2.005  | 0.97  | 0.001 | 0.03  |
| E | K | gii15607603 | 220  | 0.582 | 119.697 | 2.006  | 0.97  | 0.001 | 0.03  |
| E | K | gii15607603 | 259  | 0.515 | 106.038 | 1.561  | 0.001 | 0.9   | 0.099 |
| E | K | gii15607603 | 224  | 0.782 | 160.837 | 1.433  | 0.782 | 0.003 | 0.216 |
| B | K | gii15607603 | 289  | 0.152 | 31.308  | -1.58  | 0.004 | 0.085 | 0.91  |
| E | K | gii15607603 | 402  | 0.765 | 157.463 | 0.895  | 0.005 | 0.015 | 0.979 |
| E | K | gii15607603 | 64   | 0.587 | 120.684 | 0.855  | 0.858 | 0.002 | 0.139 |
| E | K | gii15607603 | 376  | 0.412 | 84.769  | 0.924  | 0.001 | 0.959 | 0.04  |
| E | K | gii15607603 | 102  | 0.721 | 148.227 | 1.555  | 0.858 | 0.002 | 0.139 |
| E | K | gii15607603 | 251  | 0.436 | 89.603  | 0.326  | 0.004 | 0.514 | 0.481 |
| E | K | gii15607603 | 280  | 0.572 | 117.743 | 0.724  | 0.066 | 0.296 | 0.638 |
| E | K | gii15607607 | 154  | 0.424 | 87.155  | 0.188  | 0.115 | 0.016 | 0.868 |
| E | K | gii15607609 | 60   | 0.514 | 105.771 | 0.112  | 0.016 | 0.005 | 0.979 |
| E | K | gii15607609 | 50   | 0.588 | 120.869 | 1.522  | 0.97  | 0.001 | 0.03  |
| E | K | gii15607609 | 277  | 0.463 | 95.26   | 0.679  | 0.113 | 0.087 | 0.8   |
| E | K | gii15607609 | 180  | 0.298 | 61.381  | 1.129  | 0.004 | 0.138 | 0.858 |
| E | K | gii15607609 | 134  | 0.676 | 139.053 | 0.486  | 0.053 | 0.005 | 0.942 |
| E | K | gii15607616 | 180  | 0.535 | 110.111 | 0.013  | 0.717 | 0.014 | 0.269 |
| E | K | gii15607623 | 308  | 0.442 | 90.981  | 0.712  | 0.053 | 0.043 | 0.903 |
| B | K | gii15607634 | 185  | 0.256 | 52.577  | 0.225  | 0.135 | 0.317 | 0.548 |
| B | K | gii15607641 | 142  | 0.071 | 14.564  | -1.143 | 0.002 | 0.816 | 0.182 |
| B | K | gii15607641 | 284  | 0.168 | 34.455  | 0.629  | 0.97  | 0.001 | 0.03  |
| E | K | gii15607641 | 32   | 0.47  | 96.741  | -0.484 | 0.004 | 0.138 | 0.858 |
| B | K | gii15607644 | 26   | 0.181 | 37.314  | 0.094  | 0.257 | 0.016 | 0.727 |
| E | K | gii15607651 | 150  | 0.346 | 71.172  | 1.484  | 0.802 | 0.014 | 0.185 |
| E | K | gii15607654 | 134  | 0.372 | 76.541  | 0.705  | 0.021 | 0.756 | 0.223 |
| B | K | gii15607688 | 182  | 0.06  | 12.445  | -0.526 | 0.021 | 0.451 | 0.528 |
| E | K | gii15607691 | 552  | 0.36  | 74.052  | 0.707  | 0.622 | 0.015 | 0.363 |
| E | K | gii15607706 | 123  | 0.482 | 99.168  | 0.621  | 0.021 | 0.756 | 0.223 |
| E | K | gii15607711 | 100  | 0.493 | 101.348 | 1.597  | 0.97  | 0.001 | 0.03  |
| E | K | gii15607716 | 218  | 0.45  | 92.462  | 0.877  | 0.6   | 0.003 | 0.397 |
| B | K | gii15607717 | 256  | 0.092 | 18.863  | -0.069 | 0.004 | 0.616 | 0.381 |
| E | K | gii15607720 | 151  | 0.331 | 68.169  | 0.513  | 0.004 | 0.514 | 0.481 |
| E | K | gii15607739 | 15   | 0.459 | 94.313  | 0.312  | 0.354 | 0.048 | 0.598 |
| E | K | gii15607744 | 70   | 0.295 | 60.64   | 1.026  | 0.001 | 0.959 | 0.04  |
| E | K | gii15607771 | 807  | 0.367 | 75.574  | 1.147  | 0.858 | 0.002 | 0.139 |
| E | K | gii15607772 | 10   | 0.565 | 116.138 | 0.245  | 0.004 | 0.42  | 0.576 |
| E | K | gii15607776 | 10   | 0.539 | 110.852 | 1.3    | 0.064 | 0.216 | 0.721 |
| E | K | gii15607776 | 18   | 0.277 | 57.02   | 0.35   | 0.022 | 0.359 | 0.619 |
| E | K | gii15607776 | 98   | 0.374 | 77.035  | -0.329 | 0.004 | 0.085 | 0.91  |
| E | K | gii15607776 | 109  | 0.378 | 77.857  | 0.695  | 0.001 | 0.959 | 0.04  |
| E | K | gii15607779 | 45   | 0.657 | 135.104 | -0.628 | 0.058 | 0.017 | 0.925 |
| E | K | gii15607780 | 6    | 0.606 | 124.675 | 0.764  | 0.056 | 0.142 | 0.802 |
| B | K | gii15607780 | 115  | 0.243 | 49.985  | 0.552  | 0.406 | 0.004 | 0.59  |
| E | K | gii15607780 | 83   | 0.49  | 100.793 | 1.21   | 0.97  | 0.001 | 0.03  |
| E | K | gii15607781 | 141  | 0.344 | 70.679  | -0.333 | 0.053 | 0.043 | 0.903 |
| E | K | gii15607781 | 83   | 0.381 | 78.392  | 1.219  | 0.694 | 0.003 | 0.303 |
| E | K | gii15607781 | 167  | 0.59  | 121.342 | -0.236 | 0.004 | 0.085 | 0.91  |
| B | K | gii15607782 | 273  | 0.129 | 26.535  | 1.169  | 0.988 | 0     | 0.012 |
| E | K | gii15607784 | 97   | 0.525 | 107.931 | 1.18   | 0.923 | 0.002 | 0.076 |
| B | K | gii15607784 | 271  | 0.135 | 27.687  | -1.214 | 0.97  | 0.001 | 0.03  |
| B | K | gii15607784 | 264  | 0.133 | 27.338  | 1.411  | 0.988 | 0     | 0.012 |
| E | K | gii15607787 | 298  | 0.739 | 151.93  | 0.244  | 0.246 | 0.004 | 0.75  |
| E | K | gii15607791 | 94   | 0.264 | 54.305  | 1.346  | 0.988 | 0     | 0.012 |
| E | K | gii15607791 | 18   | 0.646 | 132.944 | 1.677  | 0.802 | 0.014 | 0.185 |
| E | K | gii15607791 | 101  | 0.668 | 137.51  | 0.057  | 0.058 | 0.017 | 0.925 |
| E | K | gii15607791 | 135  | 0.306 | 62.944  | 1.337  | 0.988 | 0     | 0.012 |
| E | K | gii15607792 | 130  | 0.754 | 155.139 | 1.389  | 0.005 | 0.015 | 0.979 |
| E | K | gii15607792 | 3    | 0.645 | 132.779 | 0.754  | 0.176 | 0.004 | 0.82  |
| E | K | gii15607792 | 102  | 0.463 | 95.177  | 1.074  | 0.622 | 0.015 | 0.363 |
| E | K | gii15607792 | 110  | 0.504 | 103.57  | 1.301  | 0.858 | 0.002 | 0.139 |
| E | K | gii15607792 | 94   | 0.304 | 62.43   | 1.247  | 0.97  | 0.001 | 0.03  |
| E | K | gii15607792 | 91   | 0.455 | 93.676  | 1.094  | 0.879 | 0.01  | 0.111 |
| E | K | gii15607792 | 79   | 0.417 | 85.88   | 1.351  | 0.975 | 0.003 | 0.022 |
| E | K | gii15607792 | 74   | 0.328 | 67.408  | 1.316  | 0.354 | 0.048 | 0.598 |
| E | K | gii15607795 | 158  | 0.712 | 146.458 | 0.053  | 0.339 | 0.016 | 0.645 |
| E | K | gii15607807 | 757  | 0.694 | 142.653 | -1.103 | 0.052 | 0.084 | 0.864 |
| E | K | gii15607807 | 832  | 0.437 | 89.829  | 0.239  | 0.001 | 0.9   | 0.099 |
| B | K | gii15607807 | 840  | 0.152 | 31.205  | 1.838  | 0.001 | 0.959 | 0.04  |
| E | K | gii15607807 | 296  | 0.418 | 85.983  | -0.264 | 0.113 | 0.043 | 0.844 |
| E | K | gii15607807 | 212  | 0.571 | 117.372 | -0.863 | 0.005 | 0.336 | 0.66  |
| E | K | gii15607807 | 191  | 0.366 | 75.348  | 0.367  | 0.003 | 0.718 | 0.279 |
| E | K | gii15607807 | 258  | 0.548 | 112.621 | -0.45  | 0.502 | 0.002 | 0.495 |
| E | K | gii15607807 | 944  | 0.461 | 94.745  | -0.6   | 0.354 | 0.048 | 0.598 |
| B | K | gii15607807 | 1095 | 0.067 | 13.782  | 0.8    | 0.018 | 0.846 | 0.136 |
| E | K | gii15607807 | 803  | 0.422 | 86.723  | -0.545 | 0.052 | 0.084 | 0.864 |
| E | K | gii15607807 | 870  | 0.475 | 97.707  | 0.521  | 0.522 | 0.016 | 0.462 |
| E | K | gii15607808 | 758  | 0.557 | 114.554 | 1.243  | 0.97  | 0.001 | 0.03  |
| E | K | gii15607808 | 176  | 0.412 | 84.851  | 0.168  | 0.478 | 0.309 | 0.214 |
| E | K | gii15607808 | 228  | 0.509 | 104.619 | -0.72  | 0.184 | 0.043 | 0.773 |

|   |   |             |      |       |         |        |       |       |       |
|---|---|-------------|------|-------|---------|--------|-------|-------|-------|
| E | K | gii15607808 | 232  | 0.499 | 102.624 | -0.373 | 0.184 | 0.043 | 0.773 |
| E | K | gii15607808 | 961  | 0.358 | 73.579  | -0.785 | 0.231 | 0.33  | 0.439 |
| E | K | gii15607808 | 400  | 0.467 | 96.144  | 0.203  | 0.321 | 0.252 | 0.427 |
| E | K | gii15607808 | 1079 | 0.344 | 70.72   | -0.408 | 0.002 | 0.816 | 0.182 |
| E | K | gii15607808 | 691  | 0.548 | 112.621 | -1.152 | 0.257 | 0.016 | 0.727 |
| E | K | gii15607808 | 123  | 0.476 | 97.851  | 0.843  | 0.751 | 0.05  | 0.199 |
| E | K | gii15607808 | 470  | 0.53  | 109.083 | 0.011  | 0.115 | 0.016 | 0.868 |
| E | K | gii15607808 | 108  | 0.399 | 81.992  | 0.014  | 0.522 | 0.016 | 0.462 |
| E | K | gii15607808 | 437  | 0.397 | 81.622  | 0.481  | 0.018 | 0.088 | 0.893 |
| E | K | gii15607808 | 40   | 0.377 | 77.508  | 0.533  | 0.018 | 0.088 | 0.893 |
| E | K | gii15607808 | 43   | 0.593 | 122.042 | -0.561 | 0.052 | 0.084 | 0.864 |
| E | K | gii15607808 | 1090 | 0.511 | 105.113 | -0.12  | 0.003 | 0.718 | 0.279 |
| E | K | gii15607810 | 181  | 0.419 | 86.25   | 1.478  | 0.923 | 0.002 | 0.076 |
| E | K | gii15607810 | 108  | 0.404 | 83.021  | 1.981  | 0.97  | 0.001 | 0.03  |
| E | K | gii15607810 | 115  | 0.489 | 100.505 | 1.816  | 0.97  | 0.001 | 0.03  |
| E | K | gii15607810 | 240  | 0.458 | 94.19   | 1.085  | 0.858 | 0.002 | 0.139 |
| E | K | gii15607810 | 76   | 0.539 | 110.79  | 2.071  | 0.97  | 0.001 | 0.03  |
| E | K | gii15607823 | 70   | 0.322 | 66.256  | 0.648  | 0.052 | 0.084 | 0.864 |
| B | K | gii15607823 | 63   | 0.255 | 52.412  | 1.051  | 0.988 | 0     | 0.012 |
| E | K | gii15607823 | 143  | 0.437 | 89.809  | 1.183  | 0.938 | 0.007 | 0.055 |
| E | K | gii15607823 | 114  | 0.417 | 85.797  | 0.323  | 0.058 | 0.017 | 0.925 |
| E | K | gii15607823 | 136  | 0.51  | 104.989 | 0.912  | 0.578 | 0.229 | 0.194 |
| E | K | gii15607825 | 185  | 0.532 | 109.412 | -1.044 | 0.109 | 0.005 | 0.886 |
| E | K | gii15607825 | 210  | 0.296 | 60.887  | 0.29   | 0.018 | 0.019 | 0.964 |
| B | K | gii15607825 | 297  | 0.251 | 51.631  | 0.171  | 0.005 | 0.336 | 0.66  |
| E | K | gii15607825 | 316  | 0.336 | 69.136  | -0.455 | 0.069 | 0.386 | 0.545 |
| E | K | gii15607825 | 285  | 0.534 | 109.823 | 0.572  | 0.018 | 0.088 | 0.893 |
| E | K | gii15607825 | 10   | 0.288 | 59.303  | 0.955  | 0.018 | 0.019 | 0.964 |
| E | K | gii15607825 | 364  | 0.339 | 69.732  | 2.224  | 0.001 | 0.959 | 0.04  |
| E | K | gii15607825 | 34   | 0.417 | 85.839  | 0.419  | 0.923 | 0.002 | 0.076 |
| E | K | gii15607825 | 39   | 0.274 | 56.382  | -0.137 | 0.43  | 0.016 | 0.555 |
| E | K | gii15607825 | 47   | 0.334 | 68.704  | -0.169 | 0.802 | 0.014 | 0.185 |
| E | K | gii15607825 | 178  | 0.336 | 69.156  | 0.797  | 0.113 | 0.087 | 0.8   |
| E | K | gii15607825 | 393  | 0.455 | 93.655  | 1.383  | 0.011 | 0.918 | 0.071 |
| B | K | gii15607840 | 24   | 0.221 | 45.521  | 1.674  | 0.988 | 0     | 0.012 |
| E | K | gii15607840 | 82   | 0.62  | 127.493 | 1.351  | 0.97  | 0.001 | 0.03  |
| B | K | gii15607841 | 30   | 0.223 | 45.953  | 0.706  | 0.001 | 0.959 | 0.04  |
| E | K | gii15607842 | 7    | 0.508 | 104.454 | 0.391  | 0.021 | 0.451 | 0.528 |
| E | K | gii15607842 | 10   | 0.581 | 119.512 | 1.521  | 0.002 | 0.816 | 0.182 |
| B | K | gii15607842 | 14   | 0.255 | 52.351  | 1.314  | 0.001 | 0.9   | 0.099 |
| E | K | gii15607842 | 158  | 0.519 | 106.758 | 0.436  | 0.005 | 0.015 | 0.979 |
| E | K | gii15607842 | 173  | 0.265 | 54.593  | 1.577  | 0.911 | 0.033 | 0.057 |
| E | K | gii15607845 | 56   | 0.522 | 107.437 | 0.692  | 0.004 | 0.616 | 0.381 |
| E | K | gii15607845 | 25   | 0.627 | 129.036 | -1.966 | 0.176 | 0.004 | 0.82  |
| E | K | gii15607845 | 32   | 0.243 | 50.067  | 0.874  | 0.011 | 0.918 | 0.071 |
| E | K | gii15607845 | 81   | 0.435 | 89.438  | -0.083 | 0.069 | 0.386 | 0.545 |
| E | K | gii15607846 | 123  | 0.535 | 110.091 | -0.04  | 0.455 | 0.046 | 0.498 |
| E | K | gii15607847 | 135  | 0.333 | 68.478  | 1.419  | 0.988 | 0     | 0.012 |
| E | K | gii15607847 | 147  | 0.279 | 57.473  | 0.612  | 0.005 | 0.336 | 0.66  |
| B | K | gii15607854 | 113  | 0.286 | 58.912  | 0.475  | 0.231 | 0.33  | 0.439 |
| B | K | gii15607854 | 9    | 0.253 | 51.98   | 1.37   | 0.001 | 0.9   | 0.099 |
| E | K | gii15607854 | 17   | 0.313 | 64.322  | 1.084  | 0.023 | 0.655 | 0.322 |
| E | K | gii15607855 | 22   | 0.424 | 87.114  | 2.148  | 0.001 | 0.959 | 0.04  |
| E | K | gii15607855 | 5    | 0.518 | 106.635 | 0.572  | 0.005 | 0.336 | 0.66  |
| E | K | gii15607856 | 185  | 0.5   | 102.85  | 0.757  | 0.018 | 0.088 | 0.893 |
| E | K | gii15607856 | 55   | 0.487 | 100.176 | 0.665  | 0.858 | 0.002 | 0.139 |
| E | K | gii15607856 | 25   | 0.635 | 130.64  | 0.821  | 0.858 | 0.002 | 0.139 |
| E | K | gii15607856 | 85   | 0.43  | 88.369  | -0.019 | 0.125 | 0.227 | 0.648 |
| E | K | gii15607858 | 41   | 0.353 | 72.653  | 1.079  | 0.923 | 0.002 | 0.076 |
| E | K | gii15607858 | 58   | 0.252 | 51.939  | 0.301  | 0.004 | 0.616 | 0.381 |
| E | K | gii15607859 | 30   | 0.542 | 111.428 | -0.334 | 0.005 | 0.045 | 0.951 |
| E | K | gii15607859 | 42   | 0.362 | 74.422  | 0.496  | 0.001 | 0.9   | 0.099 |
| E | K | gii15607859 | 141  | 0.265 | 54.531  | 1.601  | 0.879 | 0.01  | 0.111 |
| E | K | gii15607862 | 5    | 0.401 | 82.424  | 1.845  | 0.001 | 0.959 | 0.04  |
| E | K | gii15607863 | 100  | 0.308 | 63.438  | 0.479  | 0.113 | 0.087 | 0.8   |
| E | K | gii15607863 | 120  | 0.342 | 70.37   | 1.12   | 0.002 | 0.816 | 0.182 |
| E | K | gii15607863 | 4    | 0.438 | 90.076  | 1.739  | 0.022 | 0.552 | 0.426 |
| E | K | gii15607863 | 116  | 0.613 | 126.197 | 1.196  | 0.004 | 0.42  | 0.576 |
| E | K | gii15607864 | 549  | 0.326 | 67.099  | 1.18   | 0.97  | 0.001 | 0.03  |
| B | K | gii15607873 | 160  | 0.173 | 35.648  | 1.703  | 0.001 | 0.959 | 0.04  |
| E | K | gii15607873 | 19   | 0.28  | 57.596  | 1.581  | 0.988 | 0     | 0.012 |
| E | K | gii15607873 | 23   | 0.43  | 88.43   | 1.207  | 0.858 | 0.002 | 0.139 |
| E | K | gii15607873 | 94   | 0.446 | 91.763  | 1.338  | 0.97  | 0.001 | 0.03  |
| B | K | gii15607873 | 13   | 0.18  | 36.985  | 0.052  | 0.6   | 0.003 | 0.397 |
| B | K | gii15607878 | 155  | 0.211 | 43.464  | -1.525 | 0.018 | 0.088 | 0.893 |
| E | K | gii15607892 | 146  | 0.552 | 113.505 | -0.806 | 0.004 | 0.138 | 0.858 |
| E | K | gii15607892 | 21   | 0.651 | 133.972 | 1.935  | 0.858 | 0.002 | 0.139 |
| E | K | gii15607893 | 319  | 0.584 | 120.149 | -0.239 | 0.058 | 0.017 | 0.925 |
| E | K | gii15607900 | 117  | 0.66  | 135.7   | -1.33  | 0.018 | 0.019 | 0.964 |
| E | K | gii15607912 | 94   | 0.286 | 58.892  | -0.057 | 0.923 | 0.002 | 0.076 |
| E | K | gii15607912 | 156  | 0.424 | 87.196  | 0.442  | 0.021 | 0.279 | 0.699 |
| E | K | gii15607913 | 167  | 0.517 | 106.306 | 0.6    | 0.018 | 0.088 | 0.893 |
| E | K | gii15607913 | 319  | 0.675 | 138.889 | -0.857 | 0.115 | 0.016 | 0.868 |
| E | K | gii15607925 | 260  | 0.38  | 78.166  | -1.083 | 0.019 | 0.141 | 0.84  |
| E | K | gii15607931 | 225  | 0.327 | 67.243  | 1.279  | 0.938 | 0.007 | 0.055 |
| E | K | gii15607938 | 110  | 0.403 | 82.856  | 1.997  | 0.988 | 0     | 0.012 |
| E | K | gii15607938 | 59   | 0.691 | 142.118 | -0.145 | 0.118 | 0.15  | 0.732 |
| E | K | gii15607940 | 46   | 0.588 | 120.931 | -0.136 | 0.018 | 0.047 | 0.935 |
| E | K | gii15607941 | 4    | 0.331 | 68.169  | 1.436  | 0.002 | 0.816 | 0.182 |
| E | K | gii15607941 | 53   | 0.255 | 52.351  | 0.434  | 0.003 | 0.718 | 0.279 |
| E | K | gii15607941 | 71   | 0.638 | 131.257 | 1.112  | 0.018 | 0.047 | 0.935 |
| E | K | gii15607949 | 37   | 0.324 | 66.626  | 1.921  | 0.97  | 0.001 | 0.03  |
| E | K | gii15607949 | 356  | 0.305 | 62.759  | 1.754  | 0.001 | 0.959 | 0.04  |
| E | K | gii15607949 | 347  | 0.588 | 120.869 | 0.762  | 0.004 | 0.514 | 0.481 |
| E | K | gii15607949 | 209  | 0.4   | 82.321  | 0.484  | 0.782 | 0.003 | 0.216 |
| E | K | gii15607951 | 321  | 0.335 | 68.91   | 1.907  | 0.004 | 0.42  | 0.576 |
| B | K | gii15607955 | 209  | 0.251 | 51.548  | 0.576  | 0.005 | 0.045 | 0.951 |
| E | K | gii15607955 | 216  | 0.566 | 116.529 | 1.616  | 0.97  | 0.001 | 0.03  |
| E | K | gii15607955 | 158  | 0.333 | 68.498  | -0.466 | 0.064 | 0.216 | 0.721 |
| E | K | gii15607955 | 67   | 0.53  | 109.062 | 1.282  | 0.97  | 0.001 | 0.03  |
| E | K | gii15607955 | 227  | 0.275 | 56.609  | 1.139  | 0.005 | 0.015 | 0.979 |

|   |   |             |     |       |         |        |       |       |       |
|---|---|-------------|-----|-------|---------|--------|-------|-------|-------|
| E | K | gii15607955 | 105 | 0.348 | 71.604  | 0.008  | 0.019 | 0.141 | 0.84  |
| B | K | gii15607955 | 107 | 0.167 | 34.414  | -0.27  | 0.087 | 0.683 | 0.23  |
| E | K | gii15607955 | 172 | 0.48  | 98.818  | -0.786 | 0.066 | 0.296 | 0.638 |
| E | K | gii15607955 | 56  | 0.386 | 79.441  | -1.056 | 0.113 | 0.043 | 0.844 |
| E | K | gii15607961 | 102 | 0.454 | 93.347  | 1.898  | 0.97  | 0.001 | 0.03  |
| E | K | gii15607971 | 89  | 0.246 | 50.52   | 0.877  | 0.004 | 0.616 | 0.381 |
| B | K | gii15607971 | 40  | 0.154 | 31.698  | 0.878  | 0.97  | 0.001 | 0.03  |
| E | K | gii15607994 | 126 | 0.55  | 113.176 | 1.311  | 0.923 | 0.002 | 0.076 |
| E | K | gii15607994 | 92  | 0.33  | 67.799  | 1.144  | 0.001 | 0.959 | 0.04  |
| B | K | gii15607998 | 376 | 0.276 | 56.732  | 1.215  | 0.005 | 0.045 | 0.951 |
| E | K | gii15607999 | 189 | 0.547 | 112.456 | -0.17  | 0.019 | 0.141 | 0.84  |
| E | K | gii15607999 | 215 | 0.342 | 70.37   | -0.093 | 0.858 | 0.002 | 0.139 |
| E | K | gii15607999 | 220 | 0.567 | 116.735 | 0.18   | 0.257 | 0.016 | 0.727 |
| E | K | gii15607999 | 222 | 0.38  | 78.145  | 1.07   | 0.268 | 0.043 | 0.689 |
| E | K | gii15607999 | 19  | 0.477 | 98.139  | -0.673 | 0.018 | 0.047 | 0.935 |
| B | K | gii15607999 | 177 | 0.224 | 46.159  | 0.929  | 0.97  | 0.001 | 0.03  |
| B | K | gii15608000 | 354 | 0.148 | 30.526  | 1.659  | 0.001 | 0.959 | 0.04  |
| E | K | gii15608000 | 363 | 0.479 | 98.551  | 2.047  | 0.923 | 0.002 | 0.076 |
| E | K | gii15608000 | 182 | 0.343 | 70.576  | 1.097  | 0.858 | 0.002 | 0.139 |
| E | K | gii15608000 | 223 | 0.511 | 105.01  | -0.609 | 0.717 | 0.014 | 0.269 |
| E | K | gii15608000 | 224 | 0.456 | 93.881  | -0.304 | 0.622 | 0.015 | 0.363 |
| E | K | gii15608000 | 210 | 0.752 | 154.645 | 0.652  | 0.502 | 0.002 | 0.495 |
| E | K | gii15608000 | 624 | 0.548 | 112.621 | -0.177 | 0.43  | 0.016 | 0.555 |
| E | K | gii15608000 | 177 | 0.442 | 90.94   | 1.67   | 0.018 | 0.019 | 0.964 |
| E | K | gii15608000 | 180 | 0.386 | 79.4    | 1.491  | 0.923 | 0.002 | 0.076 |
| E | K | gii15608000 | 611 | 0.611 | 125.662 | 0.041  | 0.018 | 0.019 | 0.964 |
| E | K | gii15608000 | 480 | 0.56  | 115.13  | -0.347 | 0.005 | 0.015 | 0.979 |
| E | K | gii15608000 | 370 | 0.548 | 112.621 | 1.355  | 0.97  | 0.001 | 0.03  |
| E | K | gii15608000 | 374 | 0.469 | 96.453  | 1.206  | 0.97  | 0.001 | 0.03  |
| E | K | gii15608000 | 227 | 0.535 | 109.967 | -0.85  | 0.43  | 0.016 | 0.555 |
| E | K | gii15608000 | 133 | 0.406 | 83.596  | -0.856 | 0.018 | 0.019 | 0.964 |
| E | K | gii15608000 | 403 | 0.469 | 96.535  | 1.085  | 0.113 | 0.043 | 0.844 |
| E | K | gii15608000 | 569 | 0.666 | 136.914 | 1.247  | 0.923 | 0.002 | 0.076 |
| E | K | gii15608000 | 589 | 0.408 | 83.967  | 1.897  | 0.97  | 0.001 | 0.03  |
| E | K | gii15608000 | 62  | 0.495 | 101.842 | -0.164 | 0.018 | 0.019 | 0.964 |
| E | K | gii15608000 | 71  | 0.462 | 94.931  | 1.536  | 0.782 | 0.003 | 0.216 |
| E | K | gii15608000 | 600 | 0.451 | 92.832  | -0.677 | 0.052 | 0.084 | 0.864 |
| E | K | gii15608000 | 49  | 0.592 | 121.816 | -0.182 | 0.018 | 0.019 | 0.964 |
| E | K | gii15608000 | 322 | 0.422 | 86.888  | -0.472 | 0.184 | 0.043 | 0.773 |
| E | K | gii15608000 | 469 | 0.252 | 51.898  | -0.027 | 0.113 | 0.043 | 0.844 |
| E | K | gii15608005 | 106 | 0.608 | 124.983 | -1.287 | 0.053 | 0.043 | 0.903 |
| E | K | gii15608013 | 451 | 0.512 | 105.421 | -0.379 | 0.6   | 0.003 | 0.397 |
| E | K | gii15608013 | 281 | 0.355 | 72.941  | 1.314  | 0.97  | 0.001 | 0.03  |
| E | K | gii15608013 | 26  | 0.381 | 78.372  | -1.375 | 0.339 | 0.016 | 0.645 |
| B | K | gii15608013 | 153 | 0.14  | 28.901  | 1.161  | 0.97  | 0.001 | 0.03  |
| E | K | gii15608013 | 248 | 0.593 | 121.96  | -0.206 | 0.052 | 0.084 | 0.864 |
| B | K | gii15608013 | 63  | 0.263 | 54.037  | 1.785  | 0.97  | 0.001 | 0.03  |
| E | K | gii15608013 | 269 | 0.483 | 99.291  | 0.155  | 0.053 | 0.043 | 0.903 |
| E | K | gii15608024 | 55  | 0.274 | 56.259  | 1.532  | 0.97  | 0.001 | 0.03  |
| B | K | gii15608024 | 111 | 0.223 | 45.933  | 1.33   | 0.923 | 0.002 | 0.076 |
| E | K | gii15608024 | 328 | 0.483 | 99.291  | 1.779  | 0.97  | 0.001 | 0.03  |
| E | K | gii15608029 | 244 | 0.37  | 76.047  | 0.777  | 0.005 | 0.262 | 0.733 |
| E | K | gii15608029 | 344 | 0.453 | 93.203  | 0.415  | 0.018 | 0.088 | 0.893 |
| E | K | gii15608029 | 27  | 0.442 | 91.022  | -0.644 | 0.019 | 0.141 | 0.84  |
| E | K | gii15608036 | 303 | 0.387 | 79.585  | 0.619  | 0.022 | 0.359 | 0.619 |
| E | K | gii15608036 | 409 | 0.285 | 58.624  | 0.64   | 0.004 | 0.085 | 0.91  |
| E | K | gii15608036 | 328 | 0.597 | 122.721 | 1.996  | 0.923 | 0.002 | 0.076 |
| E | K | gii15608036 | 332 | 0.687 | 141.275 | 0.136  | 0.502 | 0.002 | 0.495 |
| E | K | gii15608036 | 121 | 0.24  | 49.45   | 1.3    | 0.97  | 0.001 | 0.03  |
| B | K | gii15608036 | 323 | 0.211 | 43.464  | 1.606  | 0.97  | 0.001 | 0.03  |
| E | K | gii15608036 | 360 | 0.443 | 91.105  | -0.342 | 0.018 | 0.019 | 0.964 |
| B | K | gii15608036 | 170 | 0.134 | 27.667  | 0.328  | 0.923 | 0.002 | 0.076 |
| E | K | gii15608036 | 56  | 0.298 | 61.216  | 0.384  | 0.021 | 0.756 | 0.223 |
| E | K | gii15608036 | 313 | 0.545 | 112.004 | 0.703  | 0.004 | 0.085 | 0.91  |
| E | K | gii15608036 | 39  | 0.623 | 128.233 | -0.357 | 0.278 | 0.093 | 0.628 |
| E | K | gii15608043 | 178 | 0.524 | 107.684 | 0.391  | 0.053 | 0.005 | 0.942 |
| E | K | gii15608043 | 123 | 0.346 | 71.152  | 1.457  | 0.988 | 0     | 0.012 |
| E | K | gii15608045 | 156 | 0.469 | 96.514  | 0.57   | 0.019 | 0.141 | 0.84  |
| B | K | gii15608045 | 125 | 0.212 | 43.67   | -0.237 | 0.307 | 0.165 | 0.527 |
| B | K | gii15608050 | 94  | 0.267 | 54.922  | 0.737  | 0.001 | 0.959 | 0.04  |
| B | K | gii15608050 | 90  | 0.282 | 57.966  | 0.426  | 0.001 | 0.959 | 0.04  |
| E | K | gii15608065 | 230 | 0.398 | 81.91   | -0.616 | 0.43  | 0.016 | 0.555 |
| B | K | gii15608067 | 164 | 0.11  | 22.709  | 0.539  | 0.923 | 0.002 | 0.076 |
| E | K | gii15608071 | 105 | 0.609 | 125.354 | 1.742  | 0.858 | 0.002 | 0.139 |
| B | K | gii15608071 | 44  | 0.137 | 28.222  | 1.136  | 0.018 | 0.846 | 0.136 |
| E | K | gii15608086 | 249 | 0.407 | 83.761  | -0.62  | 0.502 | 0.002 | 0.495 |
| E | K | gii15608086 | 147 | 0.547 | 112.6   | 0.731  | 0.018 | 0.047 | 0.935 |
| E | K | gii15608086 | 461 | 0.477 | 98.139  | 0.539  | 0.278 | 0.093 | 0.628 |
| E | K | gii15608086 | 518 | 0.383 | 78.763  | 1.38   | 0.97  | 0.001 | 0.03  |
| B | K | gii15608091 | 60  | 0.152 | 31.287  | 1.394  | 0.001 | 0.959 | 0.04  |
| E | K | gii15608091 | 73  | 0.352 | 72.448  | 1.929  | 0.97  | 0.001 | 0.03  |
| E | K | gii15608091 | 238 | 0.538 | 110.687 | 0.132  | 0.522 | 0.016 | 0.462 |
| E | K | gii15608091 | 14  | 0.587 | 120.787 | 1.423  | 0.923 | 0.002 | 0.076 |
| E | K | gii15608091 | 138 | 0.39  | 80.285  | -0.091 | 0.021 | 0.451 | 0.528 |
| E | K | gii15608091 | 145 | 0.496 | 102.109 | 0.093  | 0.43  | 0.016 | 0.555 |
| E | K | gii15608091 | 81  | 0.586 | 120.581 | -0.649 | 0.321 | 0.003 | 0.675 |
| E | K | gii15608091 | 200 | 0.334 | 68.745  | 1.112  | 0.005 | 0.336 | 0.66  |
| E | K | gii15608091 | 32  | 0.262 | 53.935  | 1.688  | 0.97  | 0.001 | 0.03  |
| E | K | gii15608092 | 235 | 0.567 | 116.714 | 1.221  | 0.923 | 0.002 | 0.076 |
| E | K | gii15608092 | 56  | 0.538 | 110.769 | -0.176 | 0.018 | 0.047 | 0.935 |
| B | K | gii15608092 | 13  | 0.203 | 41.695  | 1.176  | 0.004 | 0.616 | 0.381 |
| E | K | gii15608092 | 75  | 0.617 | 126.896 | 0.116  | 0.321 | 0.003 | 0.675 |
| B | K | gii15608092 | 284 | 0.258 | 53.029  | 1.02   | 0.004 | 0.514 | 0.481 |
| E | K | gii15608092 | 287 | 0.572 | 117.619 | 0.084  | 0.004 | 0.085 | 0.91  |
| B | K | gii15608093 | 238 | 0.102 | 20.899  | 0.132  | 0.002 | 0.816 | 0.182 |
| E | K | gii15608097 | 143 | 0.379 | 78.001  | 0.797  | 0.522 | 0.016 | 0.462 |
| B | K | gii15608097 | 283 | 0.129 | 26.494  | 0.721  | 0.018 | 0.846 | 0.136 |
| E | K | gii15608111 | 171 | 0.433 | 89.006  | 0.27   | 0.019 | 0.141 | 0.84  |
| E | K | gii15608112 | 268 | 0.47  | 96.617  | 1.227  | 0.858 | 0.002 | 0.139 |
| E | K | gii15608114 | 41  | 0.613 | 126.156 | 1.338  | 0.938 | 0.007 | 0.055 |
| E | K | gii15608154 | 128 | 0.692 | 142.283 | 0.127  | 0.018 | 0.019 | 0.964 |

|   |   |             |      |       |         |        |       |       |       |
|---|---|-------------|------|-------|---------|--------|-------|-------|-------|
| E | K | gii15608155 | 30   | 0.306 | 62.944  | 1.244  | 0.005 | 0.045 | 0.951 |
| E | K | gii15608155 | 72   | 0.616 | 126.773 | 1.132  | 0.005 | 0.336 | 0.66  |
| E | K | gii15608157 | 29   | 0.66  | 135.824 | 1.567  | 0.97  | 0.001 | 0.03  |
| E | K | gii15608157 | 10   | 0.474 | 97.584  | 0.432  | 0.005 | 0.045 | 0.951 |
| B | K | gii15608157 | 202  | 0.152 | 31.246  | 0.221  | 0.004 | 0.616 | 0.381 |
| E | K | gii15608158 | 362  | 0.399 | 82.013  | 0.989  | 0.022 | 0.552 | 0.426 |
| E | K | gii15608163 | 65   | 0.406 | 83.432  | 1.633  | 0.938 | 0.007 | 0.055 |
| E | K | gii15608163 | 194  | 0.749 | 154.152 | 0.418  | 0.694 | 0.003 | 0.303 |
| B | K | gii15608163 | 189  | 0.274 | 56.362  | 1.196  | 0.988 | 0     | 0.012 |
| E | K | gii15608163 | 61   | 0.448 | 92.133  | 0.061  | 0.181 | 0.016 | 0.803 |
| B | K | gii15608165 | 112  | 0.199 | 40.955  | 1.353  | 0.701 | 0.107 | 0.192 |
| E | K | gii15608203 | 99   | 0.3   | 61.607  | 1.604  | 0.923 | 0.002 | 0.076 |
| E | K | gii15608203 | 74   | 0.413 | 84.954  | 1.43   | 0.938 | 0.007 | 0.055 |
| B | K | gii15608210 | 133  | 0.219 | 44.966  | -0.238 | 0.307 | 0.165 | 0.527 |
| E | K | gii15608211 | 278  | 0.751 | 154.522 | 1.204  | 0.053 | 0.005 | 0.942 |
| E | K | gii15608211 | 313  | 0.34  | 69.876  | 0.962  | 0.018 | 0.088 | 0.893 |
| E | K | gii15608211 | 134  | 0.28  | 57.637  | 1.364  | 0.074 | 0.484 | 0.442 |
| E | K | gii15608214 | 206  | 0.601 | 123.729 | 0.315  | 0.802 | 0.014 | 0.185 |
| E | K | gii15608214 | 277  | 0.631 | 129.756 | 1.217  | 0.858 | 0.002 | 0.139 |
| E | K | gii15608214 | 19   | 0.677 | 139.238 | -0.957 | 0.018 | 0.019 | 0.964 |
| E | K | gii15608214 | 125  | 0.301 | 61.936  | -1.532 | 0.053 | 0.043 | 0.903 |
| E | K | gii15608214 | 164  | 0.358 | 73.62   | -1.769 | 0.257 | 0.016 | 0.727 |
| E | K | gii15608214 | 244  | 0.446 | 91.68   | 0.912  | 0.053 | 0.043 | 0.903 |
| E | K | gii15608219 | 327  | 0.354 | 72.736  | 0.515  | 0.694 | 0.003 | 0.303 |
| E | K | gii15608219 | 120  | 0.416 | 85.53   | 0.924  | 0.923 | 0.002 | 0.076 |
| E | K | gii15608234 | 145  | 0.478 | 98.242  | -0.604 | 0.018 | 0.019 | 0.964 |
| E | K | gii15608234 | 247  | 0.27  | 55.457  | -0.247 | 0.406 | 0.004 | 0.59  |
| E | K | gii15608234 | 270  | 0.507 | 104.228 | 0.212  | 0.622 | 0.015 | 0.363 |
| E | K | gii15608234 | 139  | 0.548 | 112.662 | -0.144 | 0.246 | 0.004 | 0.75  |
| B | K | gii15608238 | 374  | 0.235 | 48.422  | 0.32   | 0.97  | 0.001 | 0.03  |
| E | K | gii15608238 | 25   | 0.636 | 130.846 | -0.211 | 0.354 | 0.048 | 0.598 |
| E | K | gii15608262 | 107  | 0.584 | 120.17  | 1.905  | 0.97  | 0.001 | 0.03  |
| E | K | gii15608262 | 112  | 0.349 | 71.81   | 1.829  | 0.321 | 0.003 | 0.675 |
| E | K | gii15608262 | 329  | 0.613 | 126.053 | -0.109 | 0.622 | 0.015 | 0.363 |
| E | K | gii15608262 | 337  | 0.521 | 107.17  | 1.041  | 0.022 | 0.359 | 0.619 |
| E | K | gii15608262 | 21   | 0.67  | 137.881 | 1.343  | 0.782 | 0.003 | 0.216 |
| E | K | gii15608273 | 735  | 0.4   | 82.198  | -0.331 | 0.005 | 0.015 | 0.979 |
| E | K | gii15608273 | 149  | 0.435 | 89.5    | 1.68   | 0.97  | 0.001 | 0.03  |
| E | K | gii15608283 | 62   | 0.484 | 99.641  | 1.302  | 0.005 | 0.015 | 0.979 |
| E | K | gii15608284 | 177  | 0.412 | 84.79   | 0.629  | 0.058 | 0.017 | 0.925 |
| E | K | gii15608284 | 127  | 0.617 | 126.958 | 1.097  | 0.858 | 0.002 | 0.139 |
| E | K | gii15608284 | 4    | 0.595 | 122.371 | 1.457  | 0.004 | 0.138 | 0.858 |
| E | K | gii15608288 | 160  | 0.283 | 58.234  | 1.502  | 0.97  | 0.001 | 0.03  |
| E | K | gii15608295 | 44   | 0.522 | 107.314 | -0.19  | 0.005 | 0.045 | 0.951 |
| E | K | gii15608296 | 120  | 0.265 | 54.531  | 0.24   | 0.858 | 0.002 | 0.139 |
| E | K | gii15608313 | 89   | 0.298 | 61.196  | -1.429 | 0.022 | 0.359 | 0.619 |
| E | K | gii15608318 | 170  | 0.416 | 85.489  | 2.355  | 0.97  | 0.001 | 0.03  |
| E | K | gii15608321 | 1176 | 0.478 | 98.283  | 1.263  | 0.923 | 0.002 | 0.076 |
| E | K | gii15608331 | 271  | 0.459 | 94.416  | 2.026  | 0.003 | 0.718 | 0.279 |
| B | K | gii15608341 | 147  | 0.229 | 47.105  | 0.171  | 0.307 | 0.165 | 0.527 |
| E | K | gii15608341 | 277  | 0.328 | 67.408  | 1.206  | 0.018 | 0.846 | 0.136 |
| B | K | gii15608372 | 56   | 0.237 | 48.689  | 0.871  | 0.001 | 0.9   | 0.099 |
| E | K | gii15608379 | 255  | 0.463 | 95.239  | -1.033 | 0.246 | 0.004 | 0.75  |
| E | K | gii15608380 | 311  | 0.491 | 101.06  | 2.138  | 0.97  | 0.001 | 0.03  |
| B | K | gii15608380 | 181  | 0.2   | 41.078  | 0.611  | 0.003 | 0.718 | 0.279 |
| E | K | gii15608380 | 226  | 0.577 | 118.689 | 0.76   | 0.858 | 0.002 | 0.139 |
| E | K | gii15608380 | 115  | 0.504 | 103.693 | 1.871  | 0.988 | 0     | 0.012 |
| E | K | gii15608385 | 51   | 0.529 | 108.836 | 1.812  | 0.923 | 0.002 | 0.076 |
| E | K | gii15608386 | 47   | 0.391 | 80.47   | 0.411  | 0.113 | 0.087 | 0.8   |
| E | K | gii15608399 | 125  | 0.522 | 107.293 | -0.796 | 0.018 | 0.019 | 0.964 |
| E | K | gii15608401 | 87   | 0.297 | 61.134  | 1.187  | 0.561 | 0.047 | 0.393 |
| E | K | gii15608405 | 166  | 0.469 | 96.494  | -0.041 | 0.257 | 0.016 | 0.727 |
| E | K | gii15608416 | 5    | 0.49  | 100.731 | 0.393  | 0.064 | 0.216 | 0.721 |
| E | K | gii15608424 | 142  | 0.726 | 149.318 | 0.603  | 0.053 | 0.043 | 0.903 |
| E | K | gii15608424 | 49   | 0.492 | 101.122 | -0.012 | 0.018 | 0.019 | 0.964 |
| E | K | gii15608432 | 280  | 0.493 | 101.369 | -0.696 | 0.021 | 0.451 | 0.528 |
| E | K | gii15608432 | 122  | 0.318 | 65.454  | 1.49   | 0.003 | 0.718 | 0.279 |
| E | K | gii15608432 | 462  | 0.318 | 65.454  | -0.042 | 0.622 | 0.015 | 0.363 |
| E | K | gii15608432 | 295  | 0.308 | 63.294  | -0.195 | 0.018 | 0.047 | 0.935 |
| B | K | gii15608435 | 124  | 0.115 | 23.676  | 0.723  | 0.97  | 0.001 | 0.03  |
| B | K | gii15608435 | 269  | 0.155 | 31.781  | 0.2    | 0.018 | 0.019 | 0.964 |
| E | K | gii15608437 | 313  | 0.561 | 115.439 | -1.004 | 0.056 | 0.142 | 0.802 |
| B | K | gii15608437 | 433  | 0.196 | 40.276  | 0.591  | 0.005 | 0.015 | 0.979 |
| E | K | gii15608446 | 134  | 0.533 | 109.576 | 1.93   | 0.97  | 0.001 | 0.03  |
| E | K | gii15608447 | 66   | 0.424 | 87.299  | 1.787  | 0.97  | 0.001 | 0.03  |
| E | K | gii15608447 | 99   | 0.308 | 63.273  | 1.562  | 0.97  | 0.001 | 0.03  |
| E | K | gii15608447 | 244  | 0.538 | 110.749 | 0.819  | 0.339 | 0.016 | 0.645 |
| E | K | gii15608448 | 387  | 0.29  | 59.674  | 0.641  | 0.97  | 0.001 | 0.03  |
| E | K | gii15608448 | 491  | 0.523 | 107.622 | 0.795  | 0.181 | 0.016 | 0.803 |
| E | K | gii15608448 | 499  | 0.381 | 78.372  | 2.159  | 0.97  | 0.001 | 0.03  |
| E | K | gii15608448 | 505  | 0.518 | 106.594 | 2.154  | 0.97  | 0.001 | 0.03  |
| E | K | gii15608448 | 509  | 0.675 | 138.889 | 1.591  | 0.923 | 0.002 | 0.076 |
| E | K | gii15608448 | 146  | 0.701 | 144.216 | -1.619 | 0.053 | 0.043 | 0.903 |
| E | K | gii15608448 | 384  | 0.655 | 134.651 | 0.726  | 0.923 | 0.002 | 0.076 |
| E | K | gii15608449 | 112  | 0.463 | 95.342  | 0.42   | 0.005 | 0.015 | 0.979 |
| E | K | gii15608450 | 125  | 0.314 | 64.672  | -1.729 | 0.02  | 0.205 | 0.775 |
| B | K | gii15608450 | 177  | 0.233 | 48.01   | -0.707 | 0.115 | 0.016 | 0.868 |
| E | K | gii15608450 | 485  | 0.637 | 130.969 | 0.7    | 0.406 | 0.004 | 0.59  |
| E | K | gii15608450 | 13   | 0.594 | 122.145 | -0.21  | 0.113 | 0.087 | 0.8   |
| E | K | gii15608450 | 7    | 0.338 | 69.485  | 0.646  | 0.938 | 0.007 | 0.055 |
| E | K | gii15608451 | 59   | 0.561 | 115.418 | 1.54   | 0.004 | 0.42  | 0.576 |
| B | K | gii15608455 | 23   | 0.205 | 42.251  | 0.339  | 0.502 | 0.002 | 0.495 |
| E | K | gii15608463 | 229  | 0.462 | 95.116  | 0.571  | 0.018 | 0.047 | 0.935 |
| E | K | gii15608463 | 12   | 0.382 | 78.536  | 0.338  | 0.113 | 0.087 | 0.8   |
| E | K | gii15608464 | 95   | 0.391 | 80.47   | 1.829  | 0.005 | 0.262 | 0.733 |
| E | K | gii15608468 | 276  | 0.538 | 110.769 | 0.387  | 0.058 | 0.017 | 0.925 |
| B | K | gii15608468 | 677  | 0.238 | 48.957  | 0.422  | 0.782 | 0.003 | 0.216 |
| E | K | gii15608468 | 704  | 0.402 | 82.63   | -0.054 | 0.181 | 0.016 | 0.803 |
| B | K | gii15608468 | 255  | 0.095 | 19.459  | 1.159  | 0.87  | 0.077 | 0.053 |
| B | K | gii15608468 | 375  | 0.162 | 33.426  | -0.001 | 0.056 | 0.142 | 0.802 |
| E | K | gii15608474 | 103  | 0.45  | 92.668  | 0.988  | 0.858 | 0.002 | 0.139 |



|   |   |             |     |       |         |        |       |       |       |
|---|---|-------------|-----|-------|---------|--------|-------|-------|-------|
| E | K | gii15608480 | 54  | 0.676 | 139.135 | -0.736 | 0.053 | 0.043 | 0.903 |
| E | K | gii15608486 | 98  | 0.291 | 59.838  | 1.022  | 0.005 | 0.015 | 0.979 |
| E | K | gii15608490 | 171 | 0.244 | 50.191  | 1.23   | 0.97  | 0.001 | 0.03  |
| B | K | gii15608490 | 204 | 0.072 | 14.749  | 0.285  | 0.97  | 0.001 | 0.03  |
| B | K | gii15608519 | 166 | 0.174 | 35.812  | 0.459  | 0.002 | 0.816 | 0.182 |
| E | K | gii15608519 | 36  | 0.4   | 82.301  | 0.97   | 0.782 | 0.003 | 0.216 |
| E | K | gii15608520 | 85  | 0.539 | 110.852 | 0.125  | 0.052 | 0.084 | 0.864 |
| E | K | gii15608523 | 3   | 0.457 | 94.046  | 1.621  | 0.021 | 0.451 | 0.528 |
| E | K | gii15608527 | 102 | 0.424 | 87.114  | 1.342  | 0.97  | 0.001 | 0.03  |
| E | K | gii15608527 | 139 | 0.376 | 77.302  | 0.624  | 0.802 | 0.014 | 0.185 |
| B | K | gii15608527 | 141 | 0.27  | 55.621  | 1.273  | 0.831 | 0.044 | 0.125 |
| E | K | gii15608527 | 129 | 0.622 | 127.925 | 1.28   | 0.782 | 0.003 | 0.216 |
| E | K | gii15608527 | 186 | 0.364 | 74.937  | 0.913  | 0.923 | 0.002 | 0.076 |
| E | K | gii15608527 | 151 | 0.637 | 131.051 | -1.33  | 0.053 | 0.005 | 0.942 |
| E | K | gii15608527 | 156 | 0.321 | 65.947  | 1.392  | 0.879 | 0.01  | 0.111 |
| B | K | gii15608530 | 295 | 0.161 | 33.097  | -0.376 | 0.118 | 0.15  | 0.732 |
| E | K | gii15608530 | 358 | 0.378 | 77.734  | 0.426  | 0.246 | 0.004 | 0.75  |
| E | K | gii15608530 | 220 | 0.34  | 70.041  | 0.592  | 0.782 | 0.003 | 0.216 |
| E | K | gii15608531 | 222 | 0.256 | 52.618  | 1.709  | 0.97  | 0.001 | 0.03  |
| E | K | gii15608531 | 213 | 0.569 | 117.126 | 0.175  | 0.802 | 0.014 | 0.185 |
| E | K | gii15608531 | 250 | 0.355 | 73.003  | 0.357  | 0.02  | 0.205 | 0.775 |
| E | K | gii15608542 | 107 | 0.729 | 149.914 | 1.209  | 0.879 | 0.01  | 0.111 |
| E | K | gii15608560 | 121 | 0.572 | 117.681 | 1.098  | 0.005 | 0.045 | 0.951 |
| E | K | gii15608574 | 220 | 0.44  | 90.487  | 0.991  | 0.717 | 0.014 | 0.269 |
| E | K | gii15608574 | 232 | 0.38  | 78.207  | 0.329  | 0.005 | 0.262 | 0.733 |
| E | K | gii15608574 | 51  | 0.353 | 72.55   | 0.575  | 0.386 | 0.097 | 0.517 |
| E | K | gii15608574 | 268 | 0.407 | 83.823  | 1.354  | 0.97  | 0.001 | 0.03  |
| B | K | gii15608574 | 280 | 0.182 | 37.376  | -0.455 | 0.023 | 0.655 | 0.322 |
| E | K | gii15608574 | 199 | 0.573 | 117.907 | -0.488 | 0.053 | 0.043 | 0.903 |
| E | K | gii15608574 | 79  | 0.242 | 49.759  | 1.45   | 0.006 | 0.962 | 0.032 |
| E | K | gii15608574 | 337 | 0.672 | 138.148 | 1.073  | 0.782 | 0.003 | 0.216 |
| E | K | gii15608575 | 140 | 0.496 | 102.048 | 1.172  | 0.97  | 0.001 | 0.03  |
| E | K | gii15608575 | 49  | 0.357 | 73.373  | 2.349  | 0.988 | 0     | 0.012 |
| E | K | gii15608575 | 7   | 0.53  | 109.042 | 0.934  | 0.018 | 0.088 | 0.893 |
| B | K | gii15608575 | 212 | 0.185 | 38.034  | 0.582  | 0.879 | 0.01  | 0.111 |
| E | K | gii15608575 | 68  | 0.596 | 122.597 | 0.126  | 0.058 | 0.017 | 0.925 |
| E | K | gii15608576 | 123 | 0.757 | 155.653 | 0.97   | 0.782 | 0.003 | 0.216 |
| E | K | gii15608576 | 34  | 0.455 | 93.676  | -0.559 | 0.115 | 0.016 | 0.868 |
| E | K | gii15608576 | 197 | 0.533 | 109.638 | 1.486  | 0.988 | 0     | 0.012 |
| E | K | gii15608576 | 90  | 0.62  | 127.555 | -0.177 | 0.879 | 0.01  | 0.111 |
| B | K | gii15608581 | 117 | 0.246 | 50.664  | 0.691  | 0.005 | 0.262 | 0.733 |
| B | K | gii15608586 | 143 | 0.056 | 11.519  | 0.572  | 0.001 | 0.959 | 0.04  |
| E | K | gii15608586 | 352 | 0.363 | 74.71   | 1.942  | 0.97  | 0.001 | 0.03  |
| E | K | gii15608586 | 123 | 0.338 | 69.588  | 1.811  | 0.97  | 0.001 | 0.03  |
| E | K | gii15608586 | 133 | 0.566 | 116.364 | 1.278  | 0.923 | 0.002 | 0.076 |
| E | K | gii15608586 | 198 | 0.51  | 104.845 | 0.16   | 0.115 | 0.016 | 0.868 |
| B | K | gii15608586 | 259 | 0.162 | 33.365  | -0.38  | 0.97  | 0.001 | 0.03  |
| E | K | gii15608586 | 216 | 0.597 | 122.762 | 0.166  | 0.622 | 0.015 | 0.363 |
| E | K | gii15608587 | 305 | 0.458 | 94.169  | -0.278 | 0.058 | 0.017 | 0.925 |
| B | K | gii15608587 | 346 | 0.138 | 28.428  | -0.339 | 0.858 | 0.002 | 0.139 |
| E | K | gii15608587 | 297 | 0.699 | 143.825 | 1.53   | 0.923 | 0.002 | 0.076 |
| E | K | gii15608587 | 356 | 0.605 | 124.346 | 0.187  | 0.115 | 0.016 | 0.868 |
| E | K | gii15608587 | 373 | 0.661 | 136.009 | -0.448 | 0.115 | 0.016 | 0.868 |
| E | K | gii15608587 | 411 | 0.526 | 108.28  | -0.228 | 0.118 | 0.15  | 0.732 |
| E | K | gii15608587 | 115 | 0.427 | 87.793  | -0.817 | 0.005 | 0.015 | 0.979 |
| E | K | gii15608587 | 677 | 0.685 | 140.843 | 1.499  | 0.97  | 0.001 | 0.03  |
| B | K | gii15608592 | 134 | 0.203 | 41.819  | 0.759  | 0.923 | 0.002 | 0.076 |
| E | K | gii15608592 | 140 | 0.504 | 103.735 | 1.477  | 0.058 | 0.017 | 0.925 |
| B | K | gii15608592 | 125 | 0.092 | 18.842  | -0.508 | 0.97  | 0.001 | 0.03  |
| E | K | gii15608605 | 179 | 0.365 | 75.039  | 1.541  | 0.011 | 0.918 | 0.071 |
| E | K | gii15608613 | 624 | 0.508 | 104.475 | 0.13   | 0.018 | 0.047 | 0.935 |
| E | K | gii15608613 | 114 | 0.358 | 73.558  | 0.626  | 0.056 | 0.142 | 0.802 |
| B | K | gii15608613 | 372 | 0.315 | 64.734  | -1.288 | 0.005 | 0.015 | 0.979 |
| E | K | gii15608613 | 384 | 0.358 | 73.702  | 0.435  | 0.455 | 0.046 | 0.498 |
| E | K | gii15608613 | 746 | 0.519 | 106.697 | -0.406 | 0.113 | 0.087 | 0.8   |
| E | K | gii15608613 | 697 | 0.525 | 107.89  | -1.001 | 0.053 | 0.043 | 0.903 |
| E | K | gii15608613 | 35  | 0.475 | 97.646  | 0.831  | 0.058 | 0.017 | 0.925 |
| E | K | gii15608613 | 501 | 0.616 | 126.793 | 0.777  | 0.176 | 0.004 | 0.82  |
| E | K | gii15608613 | 58  | 0.353 | 72.53   | 0.09   | 0.923 | 0.002 | 0.076 |
| E | K | gii15608613 | 941 | 0.695 | 142.982 | 1.042  | 0.694 | 0.003 | 0.303 |
| E | K | gii15608613 | 660 | 0.595 | 122.289 | -0.204 | 0.113 | 0.087 | 0.8   |
| B | K | gii15608613 | 277 | 0.099 | 20.323  | 1.031  | 0.001 | 0.9   | 0.099 |
| E | K | gii15608613 | 892 | 0.474 | 97.564  | -0.569 | 0.018 | 0.088 | 0.893 |
| B | K | gii15608613 | 895 | 0.265 | 54.552  | -0.07  | 0.004 | 0.42  | 0.576 |
| E | K | gii15608613 | 16  | 0.578 | 118.874 | 1.179  | 0.018 | 0.846 | 0.136 |
| E | K | gii15608613 | 20  | 0.485 | 99.662  | 0.479  | 0.005 | 0.262 | 0.733 |
| E | K | gii15608613 | 4   | 0.603 | 124.037 | -1.481 | 0.018 | 0.088 | 0.893 |
| E | K | gii15608613 | 729 | 0.323 | 66.482  | -0.159 | 0.113 | 0.043 | 0.844 |
| E | K | gii15608621 | 173 | 0.605 | 124.387 | 0.742  | 0.176 | 0.004 | 0.82  |
| E | K | gii15608621 | 104 | 0.268 | 55.045  | 1.283  | 0.923 | 0.002 | 0.076 |
| B | K | gii15608622 | 233 | 0.079 | 16.333  | -0.701 | 0.018 | 0.019 | 0.964 |
| E | K | gii15608626 | 255 | 0.494 | 101.719 | 0.781  | 0.858 | 0.002 | 0.139 |
| E | K | gii15608626 | 259 | 0.449 | 92.442  | 0.723  | 0.97  | 0.001 | 0.03  |
| E | K | gii15608626 | 204 | 0.423 | 86.949  | 0.654  | 0.97  | 0.001 | 0.03  |
| E | K | gii15608626 | 210 | 0.396 | 81.56   | 0.689  | 0.97  | 0.001 | 0.03  |
| E | K | gii15608626 | 313 | 0.492 | 101.163 | 0.347  | 0.43  | 0.016 | 0.555 |
| E | K | gii15608630 | 583 | 0.537 | 110.481 | -1.208 | 0.018 | 0.019 | 0.964 |
| E | K | gii15608631 | 337 | 0.508 | 104.516 | -0.112 | 0.058 | 0.017 | 0.925 |
| E | K | gii15608659 | 313 | 0.493 | 101.451 | 1.912  | 0.97  | 0.001 | 0.03  |
| E | K | gii15608667 | 314 | 0.507 | 104.249 | 1.856  | 0.97  | 0.001 | 0.03  |
| E | K | gii15608670 | 117 | 0.44  | 90.446  | 0.028  | 0.004 | 0.138 | 0.858 |
| E | K | gii15608671 | 45  | 0.577 | 118.668 | 0      | 0.97  | 0.001 | 0.03  |
| B | K | gii15608671 | 281 | 0.231 | 47.578  | 0.354  | 0.053 | 0.043 | 0.903 |
| E | K | gii15608674 | 388 | 0.478 | 98.242  | 1.505  | 0.923 | 0.002 | 0.076 |
| E | K | gii15608682 | 133 | 0.775 | 159.335 | 1.106  | 0.782 | 0.003 | 0.216 |
| B | K | gii15608696 | 36  | 0.142 | 29.127  | -0.285 | 0.005 | 0.045 | 0.951 |
| E | K | gii15608697 | 116 | 0.598 | 122.967 | -0.137 | 0.018 | 0.019 | 0.964 |
| E | K | gii15608731 | 147 | 0.456 | 93.799  | 0.738  | 0.321 | 0.003 | 0.675 |
| B | K | gii15608734 | 150 | 0.192 | 39.433  | -0.083 | 0.923 | 0.002 | 0.076 |
| E | K | gii15608734 | 140 | 0.322 | 66.235  | -0.028 | 0.053 | 0.043 | 0.903 |
| E | K | gii15608736 | 34  | 0.295 | 60.743  | 0.116  | 0.455 | 0.046 | 0.498 |

|   |   |             |     |       |         |        |       |       |       |
|---|---|-------------|-----|-------|---------|--------|-------|-------|-------|
| E | K | gii15608736 | 78  | 0.523 | 107.581 | -0.979 | 0.058 | 0.017 | 0.925 |
| B | K | gii15608739 | 184 | 0.197 | 40.523  | 1.041  | 0.988 | 0     | 0.012 |
| B | K | gii15608741 | 227 | 0.171 | 35.195  | 0.504  | 0.831 | 0.044 | 0.125 |
| E | K | gii15608749 | 269 | 0.426 | 87.566  | -0.372 | 0.005 | 0.015 | 0.979 |
| E | K | gii15608749 | 59  | 0.26  | 53.503  | 1.254  | 0.004 | 0.514 | 0.481 |
| E | K | gii15608755 | 317 | 0.542 | 111.489 | 0.78   | 0.058 | 0.017 | 0.925 |
| E | K | gii15608755 | 72  | 0.534 | 109.823 | -0.626 | 0.005 | 0.336 | 0.66  |
| E | K | gii15608755 | 368 | 0.33  | 67.778  | 1.217  | 0.005 | 0.262 | 0.733 |
| E | K | gii15608755 | 45  | 0.333 | 68.539  | 1.696  | 0.97  | 0.001 | 0.03  |
| E | K | gii15608755 | 431 | 0.518 | 106.614 | 1.819  | 0.97  | 0.001 | 0.03  |
| E | K | gii15608755 | 110 | 0.624 | 128.439 | 0.9    | 0.502 | 0.002 | 0.495 |
| E | K | gii15608765 | 231 | 0.77  | 158.286 | 1.63   | 0.858 | 0.002 | 0.139 |
| E | K | gii15608767 | 182 | 0.572 | 117.558 | 1.082  | 0.782 | 0.003 | 0.216 |
| E | K | gii15608767 | 786 | 0.689 | 141.666 | 0.473  | 0.694 | 0.003 | 0.303 |
| E | K | gii15608768 | 167 | 0.439 | 90.323  | 0.543  | 0.231 | 0.33  | 0.439 |
| E | K | gii15608768 | 104 | 0.282 | 58.007  | -0.064 | 0.074 | 0.484 | 0.442 |
| E | K | gii15608768 | 303 | 0.448 | 92.154  | 0.091  | 0.002 | 0.816 | 0.182 |
| E | K | gii15608769 | 238 | 0.354 | 72.736  | 0.376  | 0.018 | 0.088 | 0.893 |
| E | K | gii15608774 | 54  | 0.463 | 95.219  | -0.41  | 0.058 | 0.017 | 0.925 |
| E | K | gii15608774 | 83  | 0.55  | 113.032 | 0.615  | 0.004 | 0.085 | 0.91  |
| E | K | gii15608774 | 137 | 0.675 | 138.889 | 0.96   | 0.018 | 0.047 | 0.935 |
| E | K | gii15608774 | 5   | 0.441 | 90.734  | 0.965  | 0.019 | 0.141 | 0.84  |
| E | K | gii15608774 | 74  | 0.256 | 52.7    | 1.502  | 0.97  | 0.001 | 0.03  |
| E | K | gii15608776 | 475 | 0.604 | 124.243 | 1.481  | 0.97  | 0.001 | 0.03  |
| E | K | gii15608776 | 211 | 0.508 | 104.578 | 0.519  | 0.052 | 0.084 | 0.864 |
| E | K | gii15608779 | 190 | 0.658 | 135.248 | 0.952  | 0.115 | 0.016 | 0.868 |
| E | K | gii15608788 | 65  | 0.652 | 134.096 | 0.168  | 0.018 | 0.047 | 0.935 |
| E | K | gii15608788 | 66  | 0.374 | 76.994  | 0.664  | 0.004 | 0.138 | 0.858 |
| E | K | gii15608792 | 24  | 0.467 | 96.124  | 1.215  | 0.858 | 0.002 | 0.139 |
| B | K | gii15608792 | 34  | 0.07  | 14.502  | 0.17   | 0.001 | 0.959 | 0.04  |
| E | K | gii15608793 | 314 | 0.603 | 124.017 | 1.903  | 0.97  | 0.001 | 0.03  |
| E | K | gii15608793 | 348 | 0.427 | 87.834  | 1.561  | 0.923 | 0.002 | 0.076 |
| E | K | gii15608794 | 48  | 0.256 | 52.741  | -0.197 | 0.019 | 0.141 | 0.84  |
| E | K | gii15608794 | 240 | 0.595 | 122.453 | 0.97   | 0.938 | 0.007 | 0.055 |
| E | K | gii15608821 | 964 | 0.542 | 111.531 | 0.872  | 0.181 | 0.016 | 0.803 |
| E | K | gii15608833 | 27  | 0.531 | 109.165 | 2.239  | 0.988 | 0     | 0.012 |
| E | K | gii15608837 | 309 | 0.265 | 54.49   | 0.348  | 0.02  | 0.205 | 0.775 |
| B | K | gii15608837 | 130 | 0.223 | 45.809  | 1.474  | 0.988 | 0     | 0.012 |
| E | K | gii15608870 | 180 | 0.398 | 81.91   | 0.957  | 0.003 | 0.718 | 0.279 |
| E | K | gii15608876 | 72  | 0.316 | 65.022  | 0.964  | 0.97  | 0.001 | 0.03  |
| E | K | gii15608876 | 37  | 0.521 | 107.149 | -0.018 | 0.052 | 0.084 | 0.864 |
| E | K | gii15608876 | 76  | 0.513 | 105.586 | 1.084  | 0.923 | 0.002 | 0.076 |
| E | K | gii15608889 | 83  | 0.411 | 84.44   | 0.563  | 0.004 | 0.138 | 0.858 |
| B | K | gii15608889 | 315 | 0.225 | 46.262  | -0.601 | 0.022 | 0.552 | 0.426 |
| B | K | gii15608889 | 320 | 0.28  | 57.514  | -0.434 | 0.118 | 0.15  | 0.732 |
| E | K | gii15608889 | 175 | 0.583 | 119.861 | 0.106  | 0.005 | 0.015 | 0.979 |
| E | K | gii15608900 | 126 | 0.49  | 100.834 | 0.079  | 0.02  | 0.205 | 0.775 |
| E | K | gii15608908 | 305 | 0.317 | 65.145  | 0.121  | 0.246 | 0.004 | 0.75  |
| E | K | gii15608912 | 96  | 0.504 | 103.776 | 0.245  | 0.005 | 0.015 | 0.979 |
| E | K | gii15608958 | 679 | 0.526 | 108.178 | 1.201  | 0.97  | 0.001 | 0.03  |
| B | K | gii15608964 | 61  | 0.205 | 42.107  | 0.274  | 0.001 | 0.959 | 0.04  |
| E | K | gii15608964 | 141 | 0.461 | 94.766  | 1.111  | 0.004 | 0.085 | 0.91  |
| E | K | gii15608966 | 73  | 0.452 | 92.894  | 1.24   | 0.002 | 0.816 | 0.182 |
| E | K | gii15608969 | 292 | 0.431 | 88.595  | 1.187  | 0.802 | 0.014 | 0.185 |
| E | K | gii15608969 | 805 | 0.612 | 125.847 | -0.501 | 0.354 | 0.048 | 0.598 |
| E | K | gii15608974 | 728 | 0.363 | 74.71   | 0.532  | 0.113 | 0.087 | 0.8   |
| E | K | gii15608974 | 447 | 0.268 | 55.107  | 1.035  | 0.97  | 0.001 | 0.03  |
| E | K | gii15608974 | 570 | 0.562 | 115.562 | -0.872 | 0.115 | 0.016 | 0.868 |
| E | K | gii15608974 | 66  | 0.547 | 112.58  | 1.484  | 0.923 | 0.002 | 0.076 |
| E | K | gii15608974 | 305 | 0.573 | 117.887 | -0.655 | 0.118 | 0.15  | 0.732 |
| E | K | gii15608974 | 443 | 0.29  | 59.591  | 1.283  | 0.97  | 0.001 | 0.03  |
| E | K | gii15608974 | 167 | 0.438 | 90.076  | 1.679  | 0.97  | 0.001 | 0.03  |
| E | K | gii15608980 | 254 | 0.349 | 71.728  | -0.181 | 0.66  | 0.049 | 0.291 |
| E | K | gii15608980 | 287 | 0.517 | 106.429 | 1.187  | 0.858 | 0.002 | 0.139 |
| E | K | gii15608980 | 408 | 0.543 | 111.675 | 0.301  | 0.056 | 0.142 | 0.802 |
| E | K | gii15608992 | 187 | 0.39  | 80.244  | 1.033  | 0.923 | 0.002 | 0.076 |
| E | K | gii15608992 | 20  | 0.358 | 73.579  | -0.02  | 0.176 | 0.004 | 0.82  |
| B | K | gii15609001 | 43  | 0.204 | 42.045  | 0.195  | 0.004 | 0.616 | 0.381 |
| B | K | gii15609006 | 105 | 0.23  | 47.332  | 1.738  | 0.023 | 0.655 | 0.322 |
| E | K | gii15609009 | 28  | 0.539 | 110.872 | -0.195 | 0.058 | 0.017 | 0.925 |
| E | K | gii15609013 | 111 | 0.476 | 97.934  | 0.929  | 0.246 | 0.004 | 0.75  |
| B | K | gii15609031 | 283 | 0.24  | 49.389  | 0.214  | 0.053 | 0.043 | 0.903 |
| B | K | gii15609031 | 348 | 0.205 | 42.271  | 0.926  | 0.115 | 0.016 | 0.868 |
| E | K | gii15609033 | 41  | 0.575 | 118.339 | -0.072 | 0.016 | 0.005 | 0.979 |
| B | K | gii15609035 | 76  | 0.189 | 38.877  | 0.817  | 0.001 | 0.9   | 0.099 |
| E | K | gii15609038 | 309 | 0.55  | 113.217 | 0.899  | 0.184 | 0.043 | 0.773 |
| E | K | gii15609045 | 557 | 0.402 | 82.691  | -0.32  | 0.321 | 0.003 | 0.675 |
| E | K | gii15609045 | 600 | 0.484 | 99.559  | -1.303 | 0.058 | 0.017 | 0.925 |
| E | K | gii15609045 | 356 | 0.387 | 79.709  | -0.544 | 0.056 | 0.142 | 0.802 |
| E | K | gii15609045 | 310 | 0.608 | 125.066 | -2.328 | 0.016 | 0.005 | 0.979 |
| E | K | gii15609045 | 590 | 0.348 | 71.522  | -0.677 | 0.053 | 0.043 | 0.903 |
| E | K | gii15609045 | 688 | 0.391 | 80.388  | -0.163 | 0.125 | 0.227 | 0.648 |
| E | K | gii15609045 | 554 | 0.277 | 56.999  | 0.996  | 0.938 | 0.007 | 0.055 |
| E | K | gii15609045 | 410 | 0.415 | 85.304  | 1.86   | 0.988 | 0     | 0.012 |
| E | K | gii15609045 | 433 | 0.587 | 120.746 | -0.996 | 0.018 | 0.047 | 0.935 |
| E | K | gii15609056 | 5   | 0.483 | 99.333  | 0.861  | 0.002 | 0.816 | 0.182 |
| B | K | gii15609065 | 25  | 0.177 | 36.429  | 1.157  | 0.97  | 0.001 | 0.03  |
| E | K | gii15609069 | 90  | 0.443 | 91.228  | 1.781  | 0.97  | 0.001 | 0.03  |
| E | K | gii15609069 | 45  | 0.41  | 84.296  | 1.457  | 0.004 | 0.085 | 0.91  |
| E | K | gii15609081 | 179 | 0.42  | 86.291  | -0.111 | 0.455 | 0.046 | 0.498 |
| E | K | gii15609115 | 72  | 0.663 | 136.42  | 1.413  | 0.923 | 0.002 | 0.076 |
| B | K | gii15609117 | 115 | 0.212 | 43.67   | -0.158 | 0.011 | 0.918 | 0.071 |
| B | K | gii15609133 | 253 | 0.229 | 47.188  | 0.808  | 0.001 | 0.959 | 0.04  |
| E | K | gii15609139 | 45  | 0.479 | 98.53   | 2.2    | 0.97  | 0.001 | 0.03  |
| E | K | gii15609142 | 252 | 0.277 | 57.02   | 1.328  | 0.858 | 0.002 | 0.139 |
| E | K | gii15609142 | 80  | 0.475 | 97.769  | 1.412  | 0.923 | 0.002 | 0.076 |
| E | K | gii15609142 | 77  | 0.585 | 120.293 | 1.796  | 0.923 | 0.002 | 0.076 |
| E | K | gii15609166 | 11  | 0.339 | 69.691  | 0.111  | 0.005 | 0.015 | 0.979 |
| E | K | gii15609167 | 392 | 0.634 | 130.414 | 1.209  | 0.406 | 0.004 | 0.59  |
| E | K | gii15609168 | 64  | 0.526 | 108.136 | 0.522  | 0.004 | 0.197 | 0.799 |
| E | K | gii15609168 | 85  | 0.663 | 136.4   | 0.599  | 0.02  | 0.205 | 0.775 |

|   |   |             |     |       |         |        |       |       |       |
|---|---|-------------|-----|-------|---------|--------|-------|-------|-------|
| E | K | gii15609168 | 119 | 0.49  | 100.711 | -0.241 | 0.004 | 0.085 | 0.91  |
| E | K | gii15609168 | 132 | 0.679 | 139.732 | 0.51   | 0.018 | 0.047 | 0.935 |
| E | K | gii15609168 | 78  | 0.298 | 61.196  | 1.248  | 0.001 | 0.959 | 0.04  |
| E | K | gii15609168 | 47  | 0.423 | 86.97   | 0.77   | 0.004 | 0.197 | 0.799 |
| E | K | gii15609168 | 114 | 0.528 | 108.589 | 1.863  | 0.011 | 0.918 | 0.071 |
| E | K | gii15609169 | 12  | 0.304 | 62.492  | 1.566  | 0.988 | 0     | 0.012 |
| E | K | gii15609169 | 45  | 0.342 | 70.391  | 0.334  | 0.018 | 0.088 | 0.893 |
| B | K | gii15609191 | 183 | 0.174 | 35.73   | 1.589  | 0.001 | 0.959 | 0.04  |
| E | K | gii15609191 | 176 | 0.416 | 85.612  | 0.53   | 0.246 | 0.004 | 0.75  |
| E | K | gii15609198 | 26  | 0.264 | 54.325  | 0.657  | 0.005 | 0.336 | 0.66  |
| E | K | gii15609204 | 143 | 0.385 | 79.133  | 1.967  | 0.988 | 0     | 0.012 |
| E | K | gii15609211 | 61  | 0.317 | 65.207  | 1.245  | 0.273 | 0.587 | 0.14  |
| E | K | gii15609220 | 250 | 0.487 | 100.238 | -0.434 | 0.058 | 0.017 | 0.925 |
| E | K | gii15609229 | 761 | 0.566 | 116.344 | 1.752  | 0.003 | 0.003 | 0.994 |
| E | K | gii15609234 | 202 | 0.397 | 81.725  | 1.276  | 0.43  | 0.016 | 0.555 |
| E | K | gii15609240 | 53  | 0.358 | 73.558  | 0.754  | 0.02  | 0.205 | 0.775 |
| B | K | gii15609246 | 52  | 0.243 | 49.923  | 1.021  | 0.453 | 0.248 | 0.299 |
| E | K | gii15609249 | 376 | 0.532 | 109.515 | 1.605  | 0.97  | 0.001 | 0.03  |
| B | K | gii15609258 | 32  | 0.277 | 56.917  | -0.376 | 0.019 | 0.141 | 0.84  |
| E | K | gii15609258 | 9   | 0.481 | 98.921  | -0.077 | 0.058 | 0.017 | 0.925 |
| E | K | gii15609277 | 143 | 0.594 | 122.165 | 0.276  | 0.018 | 0.047 | 0.935 |
| E | K | gii15609277 | 140 | 0.404 | 83.165  | 0.427  | 0.004 | 0.138 | 0.858 |
| E | K | gii15609282 | 190 | 0.354 | 72.777  | 1.253  | 0.97  | 0.001 | 0.03  |
| E | K | gii15609282 | 224 | 0.407 | 83.679  | 1.34   | 0.97  | 0.001 | 0.03  |
| E | K | gii15609282 | 122 | 0.515 | 105.997 | 1.371  | 0.923 | 0.002 | 0.076 |
| E | K | gii15609282 | 15  | 0.554 | 113.958 | 0.82   | 0.184 | 0.043 | 0.773 |
| E | K | gii15609282 | 20  | 0.368 | 75.718  | -0.674 | 0.115 | 0.016 | 0.868 |
| E | K | gii15609282 | 179 | 0.316 | 64.898  | 0.882  | 0.923 | 0.002 | 0.076 |
| E | K | gii15609296 | 2   | 0.558 | 114.698 | -0.817 | 0.018 | 0.047 | 0.935 |
| B | K | gii15609298 | 36  | 0.066 | 13.597  | -0.168 | 0.113 | 0.087 | 0.8   |
| E | K | gii15609303 | 21  | 0.584 | 120.17  | 1.546  | 0.6   | 0.003 | 0.397 |
| E | K | gii15609303 | 9   | 0.456 | 93.82   | 0.359  | 0.066 | 0.296 | 0.638 |
| E | K | gii15609309 | 254 | 0.353 | 72.571  | 1.211  | 0.923 | 0.002 | 0.076 |
| E | K | gii15609309 | 163 | 0.438 | 90.179  | 1.156  | 0.021 | 0.756 | 0.223 |
| E | K | gii15609309 | 207 | 0.463 | 95.321  | 0.142  | 0.113 | 0.087 | 0.8   |
| E | K | gii15609315 | 133 | 0.299 | 61.401  | 0.738  | 0.053 | 0.043 | 0.903 |
| E | K | gii15609315 | 328 | 0.521 | 107.17  | -0.213 | 0.018 | 0.019 | 0.964 |
| B | K | gii15609319 | 132 | 0.181 | 37.335  | 0.05   | 0.43  | 0.016 | 0.555 |
| E | K | gii15609322 | 136 | 0.509 | 104.64  | 1.77   | 0.97  | 0.001 | 0.03  |
| B | K | gii15609324 | 282 | 0.239 | 49.203  | 1.432  | 0.97  | 0.001 | 0.03  |
| E | K | gii15609332 | 37  | 0.655 | 134.672 | -0.263 | 0.115 | 0.016 | 0.868 |
| E | K | gii15609333 | 456 | 0.447 | 91.886  | 0.598  | 0.023 | 0.655 | 0.322 |
| E | K | gii15609337 | 329 | 0.695 | 142.879 | -0.859 | 0.115 | 0.016 | 0.868 |
| E | K | gii15609339 | 161 | 0.747 | 153.74  | 1.028  | 0.694 | 0.003 | 0.303 |
| E | K | gii15609347 | 299 | 0.533 | 109.535 | 1.264  | 0.694 | 0.003 | 0.303 |
| E | K | gii15609348 | 290 | 0.453 | 93.264  | 0.592  | 0.858 | 0.002 | 0.139 |
| E | K | gii15609350 | 212 | 0.583 | 119.985 | 1.963  | 0.97  | 0.001 | 0.03  |
| E | K | gii15609352 | 361 | 0.316 | 64.898  | 1.001  | 0.782 | 0.003 | 0.216 |
| E | K | gii15609352 | 287 | 0.536 | 110.173 | -1.155 | 0.113 | 0.087 | 0.8   |
| E | K | gii15609352 | 302 | 0.577 | 118.648 | -1.411 | 0.058 | 0.017 | 0.925 |
| E | K | gii15609352 | 387 | 0.407 | 83.72   | 1.072  | 0.858 | 0.002 | 0.139 |
| E | K | gii15609352 | 352 | 0.239 | 49.142  | 0.905  | 0.938 | 0.007 | 0.055 |
| B | K | gii15609352 | 539 | 0.216 | 44.411  | 1.417  | 0.988 | 0     | 0.012 |
| E | K | gii15609352 | 208 | 0.488 | 100.402 | -0.843 | 0.184 | 0.043 | 0.773 |
| E | K | gii15609352 | 212 | 0.554 | 113.896 | -0.769 | 0.113 | 0.043 | 0.844 |
| E | K | gii15609352 | 273 | 0.362 | 74.525  | -0.655 | 0.135 | 0.317 | 0.548 |
| B | K | gii15609352 | 331 | 0.188 | 38.713  | 0.74   | 0.97  | 0.001 | 0.03  |
| E | K | gii15609352 | 454 | 0.465 | 95.568  | 1.364  | 0.005 | 0.015 | 0.979 |
| E | K | gii15609357 | 17  | 0.686 | 141.192 | 0.964  | 0.005 | 0.015 | 0.979 |
| B | K | gii15609357 | 201 | 0.199 | 41.017  | 1.496  | 0.97  | 0.001 | 0.03  |
| E | K | gii15609357 | 44  | 0.665 | 136.77  | 1.159  | 0.6   | 0.003 | 0.397 |
| E | K | gii15609357 | 183 | 0.411 | 84.563  | -1.025 | 0.018 | 0.047 | 0.935 |
| E | K | gii15609357 | 361 | 0.545 | 112.168 | 0.252  | 0.005 | 0.045 | 0.951 |
| E | K | gii15609357 | 14  | 0.607 | 124.86  | 1.835  | 0.782 | 0.003 | 0.216 |
| E | K | gii15609357 | 394 | 0.476 | 97.872  | 0.5    | 0.502 | 0.002 | 0.495 |
| E | K | gii15609357 | 392 | 0.387 | 79.668  | 1.164  | 0.923 | 0.002 | 0.076 |
| E | K | gii15609357 | 4   | 0.518 | 106.614 | -0.138 | 0.246 | 0.004 | 0.75  |
| E | K | gii15609357 | 11  | 0.551 | 113.32  | 2.162  | 0.97  | 0.001 | 0.03  |
| B | K | gii15609357 | 265 | 0.121 | 24.931  | 0.575  | 0.021 | 0.279 | 0.699 |
| E | K | gii15609359 | 363 | 0.614 | 126.382 | 0.357  | 0.782 | 0.003 | 0.216 |
| E | K | gii15609367 | 250 | 0.559 | 114.904 | 0.166  | 0.018 | 0.047 | 0.935 |
| E | K | gii15609376 | 31  | 0.466 | 95.856  | 0.483  | 0.538 | 0.173 | 0.289 |
| E | K | gii15609381 | 94  | 0.578 | 118.977 | 0.693  | 0.268 | 0.043 | 0.689 |
| E | K | gii15609381 | 115 | 0.804 | 165.486 | 0.443  | 0.003 | 0.003 | 0.994 |
| E | K | gii15609381 | 79  | 0.672 | 138.148 | 1.864  | 0.923 | 0.002 | 0.076 |
| E | K | gii15609381 | 58  | 0.688 | 141.439 | 1.462  | 0.004 | 0.197 | 0.799 |
| E | K | gii15609382 | 232 | 0.569 | 117.126 | -0.328 | 0.113 | 0.043 | 0.844 |
| E | K | gii15609382 | 260 | 0.43  | 88.513  | 1.942  | 0.02  | 0.205 | 0.775 |
| B | K | gii15609395 | 187 | 0.098 | 20.241  | 0.809  | 0.97  | 0.001 | 0.03  |
| E | K | gii15609417 | 354 | 0.543 | 111.675 | 1.779  | 0.97  | 0.001 | 0.03  |
| E | K | gii15609417 | 329 | 0.289 | 59.509  | -0.21  | 0.694 | 0.003 | 0.303 |
| E | K | gii15609417 | 322 | 0.446 | 91.824  | 1.869  | 0.97  | 0.001 | 0.03  |
| E | K | gii15609422 | 237 | 0.399 | 82.095  | 0.685  | 0.053 | 0.043 | 0.903 |
| E | K | gii15609433 | 262 | 0.421 | 86.661  | 1.177  | 0.858 | 0.002 | 0.139 |
| E | K | gii15609433 | 276 | 0.348 | 71.584  | -1.056 | 0.005 | 0.045 | 0.951 |
| E | K | gii15609435 | 208 | 0.435 | 89.438  | 0.624  | 0.056 | 0.142 | 0.802 |
| E | K | gii15609436 | 378 | 0.386 | 79.38   | 1.762  | 0.988 | 0     | 0.012 |
| E | K | gii15609436 | 205 | 0.453 | 93.141  | 1.549  | 0.858 | 0.002 | 0.139 |
| E | K | gii15609436 | 439 | 0.528 | 108.568 | 1.168  | 0.109 | 0.005 | 0.886 |
| E | K | gii15609436 | 72  | 0.626 | 128.789 | -0.191 | 0.005 | 0.015 | 0.979 |
| E | K | gii15609436 | 363 | 0.457 | 94.067  | 1.889  | 0.97  | 0.001 | 0.03  |
| E | K | gii15609436 | 458 | 0.582 | 119.759 | 0.003  | 0.6   | 0.003 | 0.397 |
| E | K | gii15609436 | 466 | 0.408 | 83.946  | 0.933  | 0.858 | 0.002 | 0.139 |
| E | K | gii15609451 | 13  | 0.593 | 121.96  | 2.066  | 0.97  | 0.001 | 0.03  |
| B | K | gii15609494 | 384 | 0.162 | 33.262  | 1.325  | 0.988 | 0     | 0.012 |
| E | K | gii15609495 | 96  | 0.372 | 76.5    | 1.161  | 0.923 | 0.002 | 0.076 |
| E | K | gii15609510 | 21  | 0.313 | 64.466  | 1.917  | 0.97  | 0.001 | 0.03  |
| E | K | gii15609521 | 453 | 0.382 | 78.557  | 0.487  | 0.056 | 0.142 | 0.802 |
| E | K | gii15609528 | 310 | 0.454 | 93.429  | 0.449  | 0.66  | 0.049 | 0.291 |
| E | K | gii15609528 | 321 | 0.37  | 76.068  | -0.92  | 0.428 | 0.171 | 0.402 |
| E | K | gii15609528 | 334 | 0.445 | 91.475  | -1.119 | 0.199 | 0.152 | 0.649 |

|   |   |             |      |       |         |        |       |       |       |
|---|---|-------------|------|-------|---------|--------|-------|-------|-------|
| E | K | gii15609528 | 304  | 0.527 | 108.445 | -0.583 | 0.66  | 0.049 | 0.291 |
| E | K | gii15609528 | 56   | 0.655 | 134.692 | 0.194  | 0.246 | 0.004 | 0.75  |
| E | K | gii15609528 | 523  | 0.615 | 126.526 | 0.042  | 0.018 | 0.088 | 0.893 |
| B | K | gii15609528 | 206  | 0.278 | 57.267  | 0.376  | 0.053 | 0.005 | 0.942 |
| B | K | gii15609541 | 426  | 0.223 | 45.892  | 0.063  | 0.002 | 0.816 | 0.182 |
| E | K | gii15609542 | 102  | 0.51  | 104.989 | 0.116  | 0.018 | 0.047 | 0.935 |
| E | K | gii15609543 | 84   | 0.442 | 91.002  | -0.061 | 0.005 | 0.015 | 0.979 |
| E | K | gii15609546 | 210  | 0.441 | 90.714  | -0.999 | 0.053 | 0.043 | 0.903 |
| E | K | gii15609546 | 132  | 0.763 | 156.908 | 0.425  | 0.109 | 0.005 | 0.886 |
| E | K | gii15609547 | 232  | 0.416 | 85.489  | 1.566  | 0.988 | 0     | 0.012 |
| E | K | gii15609549 | 46   | 0.456 | 93.84   | 2.206  | 0.97  | 0.001 | 0.03  |
| B | K | gii15609556 | 67   | 0.154 | 31.637  | 1.404  | 0.97  | 0.001 | 0.03  |
| E | K | gii15609556 | 47   | 0.855 | 175.832 | 0.854  | 0.246 | 0.004 | 0.75  |
| B | K | gii15609565 | 55   | 0.204 | 42.045  | -0.523 | 0.005 | 0.015 | 0.979 |
| E | K | gii15609566 | 15   | 0.53  | 109.083 | 0.741  | 0.66  | 0.049 | 0.291 |
| E | K | gii15609566 | 18   | 0.439 | 90.405  | 1.073  | 0.538 | 0.173 | 0.289 |
| E | K | gii15609566 | 7    | 0.401 | 82.445  | 0.782  | 0.879 | 0.01  | 0.111 |
| E | K | gii15609566 | 5    | 0.511 | 105.195 | 1.752  | 0.858 | 0.002 | 0.139 |
| E | K | gii15609579 | 58   | 0.617 | 126.937 | 0.68   | 0.004 | 0.197 | 0.799 |
| E | K | gii15609579 | 70   | 0.554 | 114.02  | -0.287 | 0.004 | 0.197 | 0.799 |
| E | K | gii15609579 | 24   | 0.302 | 62.142  | 1.527  | 0.001 | 0.959 | 0.04  |
| E | K | gii15609579 | 54   | 0.339 | 69.753  | -0.256 | 0.021 | 0.451 | 0.528 |
| E | K | gii15609581 | 440  | 0.371 | 76.253  | 0.405  | 0.004 | 0.616 | 0.381 |
| E | K | gii15609581 | 626  | 0.507 | 104.31  | 1.318  | 0.02  | 0.205 | 0.775 |
| B | K | gii15609581 | 485  | 0.229 | 47.126  | 1.831  | 0.988 | 0     | 0.012 |
| E | K | gii15609581 | 529  | 0.327 | 67.326  | 1.388  | 0.97  | 0.001 | 0.03  |
| E | K | gii15609585 | 828  | 0.538 | 110.728 | 1.331  | 0.97  | 0.001 | 0.03  |
| E | K | gii15609585 | 535  | 0.412 | 84.646  | -0.524 | 0.113 | 0.043 | 0.844 |
| E | K | gii15609585 | 369  | 0.632 | 129.982 | 1.367  | 0.923 | 0.002 | 0.076 |
| E | K | gii15609585 | 335  | 0.407 | 83.699  | -0.7   | 0.135 | 0.317 | 0.548 |
| E | K | gii15609591 | 45   | 0.524 | 107.787 | 0.119  | 0.522 | 0.016 | 0.462 |
| B | K | gii15609591 | 167  | 0.174 | 35.771  | -0.647 | 0.307 | 0.165 | 0.527 |
| E | K | gii15609592 | 448  | 0.618 | 127.143 | -0.445 | 0.354 | 0.048 | 0.598 |
| E | K | gii15609592 | 211  | 0.408 | 83.864  | 0.148  | 0.053 | 0.005 | 0.942 |
| E | K | gii15609599 | 33   | 0.549 | 112.97  | 2.117  | 0.97  | 0.001 | 0.03  |
| E | K | gii15609603 | 85   | 0.647 | 133.067 | -0.18  | 0.321 | 0.003 | 0.675 |
| E | K | gii15609611 | 62   | 0.517 | 106.367 | -0.396 | 0.021 | 0.279 | 0.699 |
| E | K | gii15609612 | 79   | 0.383 | 78.804  | 0.632  | 0.001 | 0.959 | 0.04  |
| E | K | gii15609612 | 62   | 0.3   | 61.628  | 1.121  | 0.001 | 0.9   | 0.099 |
| B | K | gii15609613 | 1141 | 0.19  | 39.165  | 1.491  | 0.001 | 0.9   | 0.099 |
| E | K | gii15609613 | 835  | 0.367 | 75.574  | 0.352  | 0.191 | 0.086 | 0.723 |
| B | K | gii15609613 | 845  | 0.217 | 44.657  | 0.014  | 0.004 | 0.197 | 0.799 |
| B | K | gii15609613 | 1599 | 0.226 | 46.509  | 0.386  | 0.053 | 0.005 | 0.942 |
| E | K | gii15609613 | 1268 | 0.686 | 141.11  | 0.67   | 0.923 | 0.002 | 0.076 |
| E | K | gii15609613 | 1062 | 0.5   | 102.932 | 0.112  | 0.022 | 0.359 | 0.619 |
| E | K | gii15609613 | 1442 | 0.518 | 106.573 | 1.855  | 0.97  | 0.001 | 0.03  |
| E | K | gii15609613 | 1200 | 0.383 | 78.721  | 0.954  | 0.018 | 0.047 | 0.935 |
| E | K | gii15609613 | 180  | 0.525 | 107.972 | 2.15   | 0.97  | 0.001 | 0.03  |
| E | K | gii15609613 | 275  | 0.349 | 71.851  | 0.447  | 0.004 | 0.085 | 0.91  |
| B | K | gii15609613 | 830  | 0.246 | 50.582  | 0.673  | 0.879 | 0.01  | 0.111 |
| E | K | gii15609614 | 338  | 0.562 | 115.665 | 0.816  | 0.004 | 0.42  | 0.576 |
| E | K | gii15609614 | 247  | 0.332 | 68.313  | 1.474  | 0.923 | 0.002 | 0.076 |
| E | K | gii15609614 | 432  | 0.466 | 95.774  | 1.609  | 0.003 | 0.003 | 0.994 |
| E | K | gii15609614 | 379  | 0.459 | 94.416  | 1.194  | 0.001 | 0.959 | 0.04  |
| E | K | gii15609614 | 385  | 0.348 | 71.645  | 1.277  | 0.001 | 0.9   | 0.099 |
| B | K | gii15609632 | 278  | 0.219 | 44.966  | 1.01   | 0.018 | 0.019 | 0.964 |
| E | K | gii15609635 | 23   | 0.509 | 104.66  | 1.082  | 0.858 | 0.002 | 0.139 |
| E | K | gii15609637 | 324  | 0.472 | 97.07   | 0.57   | 0.016 | 0.005 | 0.979 |
| E | K | gii15609638 | 322  | 0.555 | 114.205 | -0.31  | 0.018 | 0.047 | 0.935 |
| E | K | gii15609639 | 319  | 0.436 | 89.747  | 1.023  | 0.052 | 0.084 | 0.864 |
| E | K | gii15609640 | 156  | 0.49  | 100.772 | 0.723  | 0.003 | 0.718 | 0.279 |
| E | K | gii15609640 | 151  | 0.555 | 114.184 | -0.351 | 0.018 | 0.047 | 0.935 |
| B | K | gii15609640 | 127  | 0.185 | 38.137  | -1.672 | 0.021 | 0.279 | 0.699 |
| E | K | gii15609641 | 82   | 0.45  | 92.668  | 0.109  | 0.923 | 0.002 | 0.076 |
| B | K | gii15609648 | 136  | 0.196 | 40.276  | 0.592  | 0.97  | 0.001 | 0.03  |
| E | K | gii15609648 | 98   | 0.594 | 122.124 | -0.973 | 0.003 | 0.003 | 0.994 |
| B | K | gii15609658 | 80   | 0.159 | 32.624  | 1.023  | 0.923 | 0.002 | 0.076 |
| E | K | gii15609658 | 143  | 0.442 | 91.002  | -0.464 | 0.018 | 0.019 | 0.964 |
| E | K | gii15609658 | 12   | 0.539 | 110.79  | 1.164  | 0.053 | 0.043 | 0.903 |
| E | K | gii15609659 | 459  | 0.414 | 85.078  | 1.415  | 0.97  | 0.001 | 0.03  |
| E | K | gii15609661 | 2858 | 0.612 | 125.827 | 1.334  | 0.858 | 0.002 | 0.139 |
| B | K | gii15609661 | 2848 | 0.034 | 7.097   | -0.798 | 0.97  | 0.001 | 0.03  |
| E | K | gii15609661 | 1359 | 0.447 | 92.01   | 1.314  | 0.988 | 0     | 0.012 |
| B | K | gii15609661 | 1873 | 0.266 | 54.819  | -0.041 | 0.052 | 0.084 | 0.864 |
| E | K | gii15609664 | 115  | 0.494 | 101.616 | 1.37   | 0.879 | 0.01  | 0.111 |
| B | K | gii15609665 | 229  | 0.21  | 43.218  | 1.543  | 0.97  | 0.001 | 0.03  |
| E | K | gii15609670 | 45   | 0.605 | 124.346 | -0.836 | 0.109 | 0.005 | 0.886 |
| E | K | gii15609671 | 42   | 0.292 | 60.003  | 1.486  | 0.001 | 0.959 | 0.04  |
| E | K | gii15609671 | 48   | 0.463 | 95.342  | 0.476  | 0.005 | 0.262 | 0.733 |
| E | K | gii15609671 | 52   | 0.384 | 78.907  | 0.773  | 0.001 | 0.9   | 0.099 |
| E | K | gii15609671 | 59   | 0.442 | 90.919  | 1.759  | 0.004 | 0.514 | 0.481 |
| E | K | gii15609674 | 47   | 0.526 | 108.198 | 1.751  | 0.002 | 0.816 | 0.182 |
| B | K | gii15609675 | 39   | 0.198 | 40.811  | 1.275  | 0.004 | 0.42  | 0.576 |
| B | K | gii15609677 | 315  | 0.211 | 43.341  | 0.75   | 0.004 | 0.42  | 0.576 |
| E | K | gii15609692 | 765  | 0.561 | 115.336 | 1.515  | 0.97  | 0.001 | 0.03  |
| E | K | gii15609692 | 872  | 0.399 | 82.115  | 0.383  | 0.058 | 0.017 | 0.925 |
| E | K | gii15609692 | 548  | 0.753 | 154.933 | 0.056  | 0.005 | 0.015 | 0.979 |
| E | K | gii15609692 | 226  | 0.379 | 77.919  | 0.582  | 0.018 | 0.019 | 0.964 |
| E | K | gii15609706 | 154  | 0.562 | 115.542 | -1.319 | 0.016 | 0.005 | 0.979 |
| E | K | gii15609709 | 364  | 0.487 | 100.135 | -0.658 | 0.43  | 0.016 | 0.555 |
| E | K | gii15609718 | 45   | 0.722 | 148.536 | 1.696  | 0.858 | 0.002 | 0.139 |
| E | K | gii15609726 | 166  | 0.348 | 71.501  | -0.018 | 0.018 | 0.047 | 0.935 |
| E | K | gii15609727 | 192  | 0.454 | 93.45   | -1.604 | 0.257 | 0.016 | 0.727 |
| E | K | gii15609743 | 258  | 0.344 | 70.679  | 1.365  | 0.97  | 0.001 | 0.03  |
| E | K | gii15609743 | 271  | 0.513 | 105.586 | 1.441  | 0.97  | 0.001 | 0.03  |
| B | K | gii15609744 | 81   | 0.216 | 44.39   | 0.718  | 0.002 | 0.816 | 0.182 |
| E | K | gii15609751 | 217  | 0.426 | 87.669  | -0.957 | 0.066 | 0.296 | 0.638 |
| E | K | gii15609751 | 142  | 0.543 | 111.613 | 1.846  | 0.858 | 0.002 | 0.139 |
| E | K | gii15609751 | 406  | 0.435 | 89.5    | -0.863 | 0.056 | 0.142 | 0.802 |
| E | K | gii15609760 | 109  | 0.538 | 110.769 | 0.836  | 0.406 | 0.004 | 0.59  |
| E | K | gii15609760 | 77   | 0.587 | 120.746 | 1.929  | 0.923 | 0.002 | 0.076 |

|   |   |             |      |       |         |        |       |       |       |
|---|---|-------------|------|-------|---------|--------|-------|-------|-------|
| E | K | gii15609760 | 35   | 0.771 | 158.512 | 0.608  | 0.003 | 0.003 | 0.994 |
| E | K | gii15609761 | 82   | 0.611 | 125.744 | 1.816  | 0.004 | 0.616 | 0.381 |
| B | K | gii15609761 | 47   | 0.195 | 40.091  | 0.305  | 0.004 | 0.197 | 0.799 |
| E | K | gii15609778 | 30   | 0.494 | 101.616 | 0.224  | 0.021 | 0.756 | 0.223 |
| E | K | gii15609812 | 229  | 0.498 | 102.356 | 0.095  | 0.018 | 0.047 | 0.935 |
| E | K | gii15609813 | 44   | 0.545 | 112.168 | 0.914  | 0.923 | 0.002 | 0.076 |
| E | K | gii15609813 | 164  | 0.501 | 103.097 | -0.064 | 0.257 | 0.016 | 0.727 |
| E | K | gii15609816 | 139  | 0.278 | 57.123  | 1.566  | 0.148 | 0.418 | 0.435 |
| B | K | gii15609834 | 91   | 0.138 | 28.366  | 1.066  | 0.001 | 0.959 | 0.04  |
| E | K | gii15609840 | 59   | 0.628 | 129.138 | 0.719  | 0.053 | 0.043 | 0.903 |
| E | K | gii15609848 | 67   | 0.454 | 93.347  | 1.61   | 0.782 | 0.003 | 0.216 |
| E | K | gii15609848 | 185  | 0.426 | 87.731  | 0.844  | 0.923 | 0.002 | 0.076 |
| E | K | gii15609850 | 24   | 0.691 | 142.242 | 1.15   | 0.782 | 0.003 | 0.216 |
| E | K | gii15609853 | 29   | 0.58  | 119.285 | -0.231 | 0.003 | 0.003 | 0.994 |
| B | K | gii15609863 | 38   | 0.285 | 58.563  | -0.283 | 0.053 | 0.043 | 0.903 |
| B | K | gii15609890 | 171  | 0.194 | 39.947  | 0.085  | 0.003 | 0.718 | 0.279 |
| E | K | gii15609890 | 100  | 0.46  | 94.622  | 2.229  | 0.97  | 0.001 | 0.03  |
| E | K | gii15609902 | 193  | 0.369 | 75.862  | 2.056  | 0.97  | 0.001 | 0.03  |
| E | K | gii15609902 | 3    | 0.487 | 100.217 | 0.277  | 0.004 | 0.514 | 0.481 |
| E | K | gii15609910 | 136  | 0.354 | 72.838  | 0.214  | 0.058 | 0.017 | 0.925 |
| E | K | gii15609910 | 11   | 0.364 | 74.854  | 0.408  | 0.6   | 0.003 | 0.397 |
| E | K | gii15609910 | 149  | 0.372 | 76.582  | 1.614  | 0.988 | 0     | 0.012 |
| E | K | gii15609917 | 10   | 0.435 | 89.5    | -0.035 | 0.018 | 0.047 | 0.935 |
| E | K | gii15609917 | 75   | 0.404 | 83.103  | 0.174  | 0.005 | 0.262 | 0.733 |
| E | K | gii15609917 | 230  | 0.462 | 95.054  | 1.251  | 0.502 | 0.002 | 0.495 |
| E | K | gii15609918 | 254  | 0.296 | 60.846  | 1.014  | 0.938 | 0.007 | 0.055 |
| E | K | gii15609918 | 299  | 0.344 | 70.679  | 0.227  | 0.923 | 0.002 | 0.076 |
| E | K | gii15609920 | 697  | 0.26  | 53.544  | 0.266  | 0.021 | 0.451 | 0.528 |
| B | K | gii15609920 | 306  | 0.168 | 34.475  | 1.477  | 0.97  | 0.001 | 0.03  |
| E | K | gii15609920 | 322  | 0.561 | 115.357 | 0.647  | 0.923 | 0.002 | 0.076 |
| E | K | gii15609920 | 570  | 0.398 | 81.869  | 0.007  | 0.802 | 0.014 | 0.185 |
| E | K | gii15609920 | 63   | 0.429 | 88.142  | 0.57   | 0.018 | 0.047 | 0.935 |
| E | K | gii15609920 | 542  | 0.532 | 109.432 | -1.033 | 0.02  | 0.205 | 0.775 |
| E | K | gii15609920 | 601  | 0.313 | 64.343  | -0.604 | 0.018 | 0.846 | 0.136 |
| E | K | gii15609922 | 44   | 0.606 | 124.675 | 1.507  | 0.858 | 0.002 | 0.139 |
| E | K | gii15609923 | 47   | 0.615 | 126.505 | 1.695  | 0.97  | 0.001 | 0.03  |
| E | K | gii15609926 | 157  | 0.387 | 79.647  | 1.462  | 0.018 | 0.846 | 0.136 |
| E | K | gii15609955 | 352  | 0.259 | 53.194  | 1.083  | 0.97  | 0.001 | 0.03  |
| E | K | gii15609955 | 202  | 0.355 | 73.003  | 0.727  | 0.561 | 0.047 | 0.393 |
| E | K | gii15609955 | 199  | 0.53  | 108.98  | -0.386 | 0.561 | 0.047 | 0.393 |
| E | K | gii15609976 | 765  | 0.541 | 111.387 | 1.19   | 0.923 | 0.002 | 0.076 |
| E | K | gii15609976 | 862  | 0.566 | 116.488 | 0.397  | 0.113 | 0.043 | 0.844 |
| E | K | gii15609976 | 799  | 0.563 | 115.727 | 1.365  | 0.058 | 0.017 | 0.925 |
| E | K | gii15609976 | 513  | 0.262 | 53.832  | 0.664  | 0.018 | 0.019 | 0.964 |
| E | K | gii15609982 | 173  | 0.388 | 79.873  | 1.399  | 0.97  | 0.001 | 0.03  |
| E | K | gii15609982 | 531  | 0.315 | 64.857  | 0.77   | 0.879 | 0.01  | 0.111 |
| E | K | gii15609982 | 128  | 0.382 | 78.577  | 0.097  | 0.522 | 0.016 | 0.462 |
| E | K | gii15609982 | 26   | 0.337 | 69.239  | 1.144  | 0.97  | 0.001 | 0.03  |
| E | K | gii15609982 | 495  | 0.486 | 100.052 | -0.193 | 0.018 | 0.019 | 0.964 |
| E | K | gii15610005 | 336  | 0.333 | 68.478  | -0.242 | 0.02  | 0.205 | 0.775 |
| E | K | gii15610005 | 133  | 0.517 | 106.265 | 2.196  | 0.988 | 0     | 0.012 |
| E | K | gii15610005 | 122  | 0.481 | 98.839  | -0.463 | 0.058 | 0.017 | 0.925 |
| E | K | gii15610019 | 158  | 0.621 | 127.699 | 1.711  | 0.97  | 0.001 | 0.03  |
| E | K | gii15610019 | 162  | 0.583 | 119.903 | 2.049  | 0.97  | 0.001 | 0.03  |
| E | K | gii15610019 | 115  | 0.525 | 108.095 | 1.966  | 0.988 | 0     | 0.012 |
| E | K | gii15610019 | 144  | 0.683 | 140.575 | 0.338  | 0.321 | 0.003 | 0.675 |
| B | K | gii15610019 | 68   | 0.163 | 33.529  | 1.296  | 0.002 | 0.816 | 0.182 |
| E | K | gii15610026 | 214  | 0.447 | 92.051  | 0.777  | 0.016 | 0.005 | 0.979 |
| E | K | gii15610026 | 221  | 0.405 | 83.247  | 0.938  | 0.751 | 0.05  | 0.199 |
| E | K | gii15610026 | 131  | 0.402 | 82.671  | 1.036  | 0.113 | 0.043 | 0.844 |
| E | K | gii15610027 | 109  | 0.463 | 95.239  | 0.319  | 0.858 | 0.002 | 0.139 |
| E | K | gii15610032 | 273  | 0.456 | 93.717  | 1.07   | 0.923 | 0.002 | 0.076 |
| E | K | gii15610038 | 77   | 0.353 | 72.612  | 0.234  | 0.079 | 0.592 | 0.329 |
| E | K | gii15610041 | 43   | 0.291 | 59.818  | 0.806  | 0.001 | 0.9   | 0.099 |
| E | K | gii15610046 | 84   | 0.414 | 85.222  | -0.092 | 0.561 | 0.047 | 0.393 |
| E | K | gii15610046 | 94   | 0.476 | 97.913  | 0.541  | 0.199 | 0.152 | 0.649 |
| E | K | gii15610056 | 9    | 0.266 | 54.696  | 1.601  | 0.005 | 0.262 | 0.733 |
| E | K | gii15610064 | 167  | 0.626 | 128.83  | 1.64   | 0.97  | 0.001 | 0.03  |
| E | K | gii15610064 | 100  | 0.427 | 87.793  | 1.688  | 0.97  | 0.001 | 0.03  |
| E | K | gii15610065 | 56   | 0.293 | 60.229  | 1.198  | 0.004 | 0.616 | 0.381 |
| E | K | gii15610072 | 34   | 0.355 | 73.085  | 0.25   | 0.018 | 0.019 | 0.964 |
| E | K | gii15610072 | 379  | 0.383 | 78.701  | 0.884  | 0.6   | 0.003 | 0.397 |
| B | K | gii15610077 | 1561 | 0.112 | 23.059  | 0.261  | 0.003 | 0.718 | 0.279 |
| B | K | gii15610077 | 1582 | 0.219 | 45.007  | 0.587  | 0.257 | 0.016 | 0.727 |
| E | K | gii15610077 | 2081 | 0.278 | 57.143  | 0.423  | 0.649 | 0.163 | 0.188 |
| E | K | gii15610088 | 142  | 0.49  | 100.855 | 1.107  | 0.522 | 0.016 | 0.462 |
| E | K | gii15610088 | 187  | 0.551 | 113.382 | -0.857 | 0.018 | 0.019 | 0.964 |
| E | K | gii15610090 | 127  | 0.669 | 137.634 | 1.246  | 0.923 | 0.002 | 0.076 |
| E | K | gii15610102 | 55   | 0.322 | 66.153  | 1.797  | 0.97  | 0.001 | 0.03  |
| E | K | gii15610104 | 508  | 0.612 | 125.827 | 0.178  | 0.605 | 0.105 | 0.29  |
| E | K | gii15610106 | 159  | 0.353 | 72.55   | 0.557  | 0.694 | 0.003 | 0.303 |
| E | K | gii15610106 | 67   | 0.73  | 150.223 | -1.149 | 0.058 | 0.017 | 0.925 |
| B | K | gii15610121 | 489  | 0.257 | 52.824  | 0.613  | 0.199 | 0.152 | 0.649 |
| E | K | gii15610121 | 687  | 0.361 | 74.196  | 0.466  | 0.004 | 0.138 | 0.858 |
| E | K | gii15610121 | 223  | 0.421 | 86.6    | 1.277  | 0.002 | 0.816 | 0.182 |
| E | K | gii15610121 | 519  | 0.53  | 108.939 | -0.362 | 0.181 | 0.016 | 0.803 |
| E | K | gii15610122 | 148  | 0.477 | 98.078  | -1.35  | 0.268 | 0.043 | 0.689 |
| E | K | gii15610122 | 55   | 0.343 | 70.473  | 0.34   | 0.022 | 0.359 | 0.619 |
| E | K | gii15610123 | 103  | 0.519 | 106.655 | -0.558 | 0.058 | 0.017 | 0.925 |
| E | K | gii15610123 | 70   | 0.582 | 119.615 | 1.042  | 0.021 | 0.756 | 0.223 |
| E | K | gii15610123 | 72   | 0.519 | 106.738 | 0.62   | 0.019 | 0.141 | 0.84  |
| B | K | gii15610128 | 61   | 0.125 | 25.692  | 0.974  | 0.911 | 0.033 | 0.057 |
| B | K | gii15610132 | 178  | 0.142 | 29.271  | 0.371  | 0.053 | 0.043 | 0.903 |
| B | K | gii15610132 | 171  | 0.276 | 56.855  | 0.349  | 0.005 | 0.015 | 0.979 |
| E | K | gii15610139 | 133  | 0.3   | 61.813  | 1.809  | 0.858 | 0.002 | 0.139 |
| E | K | gii15610139 | 75   | 0.401 | 82.465  | 1.832  | 0.001 | 0.959 | 0.04  |
| E | K | gii15610146 | 152  | 0.308 | 63.438  | 0.657  | 0.118 | 0.15  | 0.732 |
| B | K | gii15610146 | 234  | 0.234 | 48.175  | 0.264  | 0.004 | 0.42  | 0.576 |
| E | K | gii15610146 | 254  | 0.483 | 99.271  | 1.017  | 0.858 | 0.002 | 0.139 |
| E | K | gii15610146 | 248  | 0.328 | 67.408  | 0.469  | 0.004 | 0.42  | 0.576 |
| E | K | gii15610147 | 64   | 0.287 | 59.139  | -0.174 | 0.176 | 0.004 | 0.82  |

|   |   |             |     |       |         |        |       |       |       |
|---|---|-------------|-----|-------|---------|--------|-------|-------|-------|
| E | K | gii15610165 | 57  | 0.276 | 56.814  | 2.149  | 0.001 | 0.9   | 0.099 |
| E | K | gii15610165 | 17  | 0.591 | 121.589 | 1.15   | 0.622 | 0.015 | 0.363 |
| E | K | gii15610165 | 51  | 0.412 | 84.748  | 0.644  | 0.858 | 0.002 | 0.139 |
| E | K | gii15610165 | 284 | 0.388 | 79.77   | 0.585  | 0.004 | 0.085 | 0.91  |
| E | K | gii15610165 | 304 | 0.494 | 101.595 | 1.914  | 0.97  | 0.001 | 0.03  |
| E | K | gii15610165 | 314 | 0.504 | 103.57  | 1.837  | 0.97  | 0.001 | 0.03  |
| E | K | gii15610166 | 87  | 0.255 | 52.392  | 0.718  | 0.022 | 0.552 | 0.426 |
| B | K | gii15610166 | 92  | 0.246 | 50.52   | 0.687  | 0.003 | 0.718 | 0.279 |
| E | K | gii15610166 | 53  | 0.555 | 114.163 | 0.995  | 0.802 | 0.014 | 0.185 |
| E | K | gii15610166 | 197 | 0.565 | 116.22  | 0.993  | 0.858 | 0.002 | 0.139 |
| E | K | gii15610166 | 79  | 0.404 | 83.206  | 1.349  | 0.97  | 0.001 | 0.03  |
| E | K | gii15610166 | 19  | 0.522 | 107.437 | 1.141  | 0.001 | 0.9   | 0.099 |
| E | K | gii15610166 | 153 | 0.464 | 95.404  | 1.163  | 0.001 | 0.9   | 0.099 |
| E | K | gii15610166 | 160 | 0.349 | 71.769  | 1.972  | 0.001 | 0.9   | 0.099 |
| E | K | gii15610166 | 245 | 0.414 | 85.078  | 1.091  | 0.001 | 0.959 | 0.04  |
| E | K | gii15610166 | 264 | 0.607 | 124.778 | 1.039  | 0.058 | 0.017 | 0.925 |
| E | K | gii15610182 | 36  | 0.288 | 59.262  | 1.224  | 0.001 | 0.9   | 0.099 |
| E | K | gii15610182 | 109 | 0.493 | 101.369 | 0.459  | 0.522 | 0.016 | 0.462 |
| B | K | gii15610182 | 210 | 0.122 | 25.034  | 0.999  | 0.923 | 0.002 | 0.076 |
| E | K | gii15610182 | 209 | 0.637 | 131.01  | 0.862  | 0.782 | 0.003 | 0.216 |
| E | K | gii15610187 | 12  | 0.596 | 122.535 | 0.309  | 0.058 | 0.017 | 0.925 |
| E | K | gii15610187 | 63  | 0.481 | 99.024  | 0.783  | 0.113 | 0.043 | 0.844 |
| E | K | gii15610188 | 500 | 0.703 | 144.566 | 0.243  | 0.018 | 0.047 | 0.935 |
| E | K | gii15610188 | 65  | 0.49  | 100.814 | 2.093  | 0.97  | 0.001 | 0.03  |
| E | K | gii15610188 | 259 | 0.494 | 101.554 | -0.017 | 0.455 | 0.046 | 0.498 |
| E | K | gii15610198 | 452 | 0.377 | 77.487  | 0.541  | 0.782 | 0.003 | 0.216 |
| E | K | gii15610212 | 276 | 0.392 | 80.676  | 1.914  | 0.97  | 0.001 | 0.03  |
| E | K | gii15610212 | 151 | 0.6   | 123.502 | -0.035 | 0.115 | 0.016 | 0.868 |
| E | K | gii15610223 | 227 | 0.666 | 136.934 | 1.708  | 0.858 | 0.002 | 0.139 |
| E | K | gii15610224 | 341 | 0.325 | 66.832  | 0.541  | 0.923 | 0.002 | 0.076 |
| E | K | gii15610225 | 54  | 0.464 | 95.445  | -0.102 | 0.115 | 0.016 | 0.868 |
| E | K | gii15610226 | 487 | 0.354 | 72.818  | 0.73   | 0.622 | 0.015 | 0.363 |
| E | K | gii15610231 | 14  | 0.402 | 82.691  | 2.349  | 0.97  | 0.001 | 0.03  |
| E | K | gii15610236 | 197 | 0.481 | 98.942  | -0.486 | 0.052 | 0.084 | 0.864 |
| E | K | gii15610236 | 269 | 0.508 | 104.496 | 0.248  | 0.879 | 0.01  | 0.111 |
| B | K | gii15610242 | 302 | 0.2   | 41.037  | 1.902  | 0.97  | 0.001 | 0.03  |
| E | K | gii15610269 | 107 | 0.526 | 108.239 | 0.848  | 0.016 | 0.005 | 0.979 |
| E | K | gii15610269 | 179 | 0.541 | 111.304 | 0.585  | 0.802 | 0.014 | 0.185 |
| E | K | gii15610269 | 182 | 0.511 | 105.092 | 1.773  | 0.97  | 0.001 | 0.03  |
| E | K | gii15610275 | 244 | 0.391 | 80.408  | 1.234  | 0.018 | 0.846 | 0.136 |
| E | K | gii15610275 | 12  | 0.472 | 97.008  | 0.708  | 0.339 | 0.016 | 0.645 |
| E | K | gii15610276 | 10  | 0.48  | 98.674  | 1.376  | 0.923 | 0.002 | 0.076 |
| E | K | gii15610285 | 45  | 0.449 | 92.359  | 2.31   | 0.988 | 0     | 0.012 |
| E | K | gii15610286 | 246 | 0.686 | 141.11  | -0.971 | 0.018 | 0.019 | 0.964 |
| E | K | gii15610305 | 308 | 0.378 | 77.775  | -1.149 | 0.019 | 0.141 | 0.84  |
| B | K | gii15610336 | 157 | 0.198 | 40.749  | -0.376 | 0.782 | 0.003 | 0.216 |
| E | K | gii15610346 | 166 | 0.443 | 91.146  | 0.222  | 0.354 | 0.048 | 0.598 |
| B | K | gii15610351 | 188 | 0.277 | 57.041  | 0.901  | 0.002 | 0.816 | 0.182 |
| B | K | gii15610359 | 79  | 0.226 | 46.488  | 0.399  | 0.802 | 0.014 | 0.185 |
| B | K | gii15610360 | 37  | 0.231 | 47.434  | 0.986  | 0.004 | 0.138 | 0.858 |
| E | K | gii15610360 | 44  | 0.601 | 123.605 | 0.315  | 0.6   | 0.003 | 0.397 |
| E | K | gii15610360 | 136 | 0.287 | 58.954  | 1.181  | 0.858 | 0.002 | 0.139 |
| E | K | gii15610360 | 216 | 0.377 | 77.569  | 1.346  | 0.018 | 0.019 | 0.964 |
| E | K | gii15610360 | 230 | 0.546 | 112.23  | 0.343  | 0.058 | 0.017 | 0.925 |
| E | K | gii15610360 | 6   | 0.252 | 51.898  | 1.55   | 0.005 | 0.336 | 0.66  |
| B | K | gii15610363 | 23  | 0.206 | 42.354  | -0.056 | 0.321 | 0.003 | 0.675 |
| E | K | gii15610382 | 108 | 0.415 | 85.365  | 0.971  | 0.058 | 0.017 | 0.925 |
| B | K | gii15610384 | 188 | 0.214 | 43.958  | -0.144 | 0.701 | 0.107 | 0.192 |
| E | K | gii15610384 | 350 | 0.527 | 108.383 | 1.292  | 0.782 | 0.003 | 0.216 |
| E | K | gii15610384 | 60  | 0.616 | 126.608 | 1.314  | 0.058 | 0.017 | 0.925 |
| B | K | gii15610384 | 254 | 0.187 | 38.445  | 0.156  | 0.455 | 0.046 | 0.498 |
| E | K | gii15610384 | 456 | 0.307 | 63.068  | 1.125  | 0.97  | 0.001 | 0.03  |
| B | K | gii15610384 | 213 | 0.175 | 36.08   | 0.769  | 0.021 | 0.756 | 0.223 |
| E | K | gii15610384 | 471 | 0.584 | 120.129 | 1.526  | 0.125 | 0.227 | 0.648 |
| E | K | gii15610384 | 474 | 0.69  | 141.933 | 0.758  | 0.717 | 0.014 | 0.269 |
| E | K | gii15610384 | 384 | 0.292 | 60.147  | 0.59   | 0.064 | 0.216 | 0.721 |
| E | K | gii15610384 | 118 | 0.475 | 97.728  | 0.057  | 0.052 | 0.084 | 0.864 |
| E | K | gii15610391 | 289 | 0.36  | 73.97   | 0.396  | 0.018 | 0.047 | 0.935 |
| B | K | gii15610391 | 400 | 0.161 | 33.159  | 1.705  | 0.001 | 0.959 | 0.04  |
| E | K | gii15610391 | 307 | 0.406 | 83.452  | -0.32  | 0.018 | 0.047 | 0.935 |
| E | K | gii15610405 | 33  | 0.586 | 120.602 | 0.558  | 0.43  | 0.016 | 0.555 |
| E | K | gii15610405 | 53  | 0.492 | 101.163 | 0.589  | 0.66  | 0.049 | 0.291 |
| E | K | gii15610406 | 71  | 0.565 | 116.262 | 1.941  | 0.923 | 0.002 | 0.076 |
| E | K | gii15610408 | 231 | 0.394 | 80.943  | -1.566 | 0.184 | 0.043 | 0.773 |
| E | K | gii15610408 | 273 | 0.373 | 76.767  | 1.987  | 0.988 | 0     | 0.012 |
| E | K | gii15610408 | 269 | 0.588 | 121.013 | 0.845  | 0.923 | 0.002 | 0.076 |
| E | K | gii15610410 | 151 | 0.362 | 74.505  | 1.855  | 0.006 | 0.962 | 0.032 |
| E | K | gii15610410 | 32  | 0.652 | 134.096 | 1.951  | 0.858 | 0.002 | 0.139 |
| E | K | gii15610410 | 44  | 0.698 | 143.62  | 1.295  | 0.246 | 0.004 | 0.75  |
| E | K | gii15610410 | 207 | 0.508 | 104.516 | 0.101  | 0.056 | 0.142 | 0.802 |
| E | K | gii15610410 | 197 | 0.294 | 60.373  | 0.533  | 0.005 | 0.015 | 0.979 |
| E | K | gii15610410 | 117 | 0.608 | 124.963 | 1.414  | 0.97  | 0.001 | 0.03  |
| E | K | gii15610411 | 160 | 0.296 | 60.99   | 0.792  | 0.782 | 0.003 | 0.216 |
| B | K | gii15610412 | 368 | 0.183 | 37.623  | -0.078 | 0.004 | 0.514 | 0.481 |
| E | K | gii15610412 | 361 | 0.444 | 91.393  | -0.032 | 0.018 | 0.088 | 0.893 |
| E | K | gii15610416 | 50  | 0.599 | 123.214 | 1.54   | 0.622 | 0.015 | 0.363 |
| E | K | gii15610416 | 91  | 0.565 | 116.22  | -0.342 | 0.184 | 0.043 | 0.773 |
| E | K | gii15610417 | 105 | 0.548 | 112.682 | -0.177 | 0.058 | 0.017 | 0.925 |
| E | K | gii15610419 | 214 | 0.324 | 66.606  | -0.525 | 0.43  | 0.016 | 0.555 |
| E | K | gii15610419 | 186 | 0.476 | 97.954  | -0.537 | 0.066 | 0.296 | 0.638 |
| E | K | gii15610421 | 149 | 0.546 | 112.209 | 0.043  | 0.058 | 0.017 | 0.925 |
| E | K | gii15610421 | 330 | 0.524 | 107.766 | 0.108  | 0.005 | 0.015 | 0.979 |
| B | K | gii15610421 | 14  | 0.173 | 35.648  | 1.16   | 0.268 | 0.505 | 0.227 |
| E | K | gii15610421 | 366 | 0.314 | 64.569  | 0.253  | 0.023 | 0.655 | 0.322 |
| E | K | gii15610438 | 29  | 0.73  | 150.099 | 0.828  | 0.43  | 0.016 | 0.555 |
| B | K | gii15610438 | 387 | 0.165 | 33.982  | -0.824 | 0.6   | 0.003 | 0.397 |
| E | K | gii15610447 | 408 | 0.519 | 106.676 | 1.297  | 0.97  | 0.001 | 0.03  |
| E | K | gii15610454 | 476 | 0.433 | 88.965  | 1.823  | 0.97  | 0.001 | 0.03  |
| E | K | gii15610472 | 323 | 0.533 | 109.659 | 2.165  | 0.97  | 0.001 | 0.03  |
| E | K | gii15610472 | 191 | 0.367 | 75.554  | -0.314 | 0.066 | 0.296 | 0.638 |
| E | K | gii15610475 | 27  | 0.421 | 86.538  | 1.991  | 0.988 | 0     | 0.012 |

|   |   |             |     |       |         |        |       |       |       |
|---|---|-------------|-----|-------|---------|--------|-------|-------|-------|
| E | K | gii15610476 | 372 | 0.466 | 95.774  | 0.791  | 0.184 | 0.043 | 0.773 |
| E | K | gii15610492 | 20  | 0.364 | 74.978  | 2.212  | 0.988 | 0     | 0.012 |
| E | K | gii15610492 | 9   | 0.476 | 98.016  | 1.871  | 0.879 | 0.01  | 0.111 |
| E | K | gii15610492 | 59  | 0.601 | 123.667 | 1.015  | 0.802 | 0.014 | 0.185 |
| E | K | gii15610504 | 25  | 0.524 | 107.869 | 1.163  | 0.018 | 0.019 | 0.964 |
| B | K | gii15610525 | 242 | 0.223 | 45.789  | -0.595 | 0.005 | 0.336 | 0.66  |
| E | K | gii15610525 | 113 | 0.413 | 84.975  | 0.301  | 0.005 | 0.262 | 0.733 |
| E | K | gii15610525 | 96  | 0.473 | 97.337  | 1.983  | 0.001 | 0.9   | 0.099 |
| E | K | gii15610525 | 109 | 0.386 | 79.318  | 0.755  | 0.004 | 0.42  | 0.576 |
| E | K | gii15610528 | 6   | 0.616 | 126.691 | 0.522  | 0.406 | 0.004 | 0.59  |
| E | K | gii15610532 | 418 | 0.638 | 131.237 | 0.519  | 0.802 | 0.014 | 0.185 |
| E | K | gii15610532 | 380 | 0.318 | 65.413  | 1.064  | 0.782 | 0.003 | 0.216 |
| E | K | gii15610537 | 136 | 0.318 | 65.413  | 1.865  | 0.001 | 0.959 | 0.04  |
| E | K | gii15610537 | 258 | 0.512 | 105.421 | 1.294  | 0.002 | 0.816 | 0.182 |
| E | K | gii15610546 | 31  | 0.623 | 128.048 | -0.495 | 0.02  | 0.205 | 0.775 |
| E | K | gii15610553 | 140 | 0.483 | 99.312  | 0.769  | 0.858 | 0.002 | 0.139 |
| E | K | gii15610553 | 275 | 0.522 | 107.437 | 0.11   | 0.02  | 0.205 | 0.775 |
| E | K | gii15610553 | 41  | 0.367 | 75.492  | 0.748  | 0.022 | 0.359 | 0.619 |
| E | K | gii15610553 | 284 | 0.404 | 83.021  | 1.236  | 0.923 | 0.002 | 0.076 |
| E | K | gii15610553 | 423 | 0.42  | 86.291  | 1.233  | 0.97  | 0.001 | 0.03  |
| E | K | gii15610553 | 267 | 0.574 | 117.969 | -0.418 | 0.502 | 0.002 | 0.495 |
| E | K | gii15610553 | 270 | 0.369 | 75.862  | 0.496  | 0.064 | 0.216 | 0.721 |
| E | K | gii15610553 | 121 | 0.353 | 72.55   | 1.828  | 0.988 | 0     | 0.012 |
| E | K | gii15610553 | 325 | 0.6   | 123.502 | -0.487 | 0.018 | 0.088 | 0.893 |
| B | K | gii15610553 | 362 | 0.207 | 42.6    | 1.41   | 0.011 | 0.918 | 0.071 |
| E | K | gii15610553 | 388 | 0.497 | 102.233 | 1.445  | 0.97  | 0.001 | 0.03  |
| E | K | gii15610554 | 3   | 0.582 | 119.82  | -0.169 | 0.018 | 0.088 | 0.893 |
| E | K | gii15610554 | 7   | 0.399 | 82.013  | 1.853  | 0.021 | 0.451 | 0.528 |
| E | K | gii15610554 | 100 | 0.803 | 165.28  | 1.298  | 0.005 | 0.015 | 0.979 |
| E | K | gii15610554 | 37  | 0.464 | 95.465  | 0.546  | 0.018 | 0.088 | 0.893 |
| E | K | gii15610554 | 35  | 0.564 | 115.933 | 0.267  | 0.052 | 0.084 | 0.864 |
| E | K | gii15610554 | 73  | 0.595 | 122.494 | 0.15   | 0.005 | 0.045 | 0.951 |
| E | K | gii15610554 | 80  | 0.588 | 121.054 | 1.571  | 0.001 | 0.959 | 0.04  |
| E | K | gii15610554 | 57  | 0.439 | 90.364  | 0.341  | 0.004 | 0.514 | 0.481 |
| E | K | gii15610568 | 446 | 0.791 | 162.77  | 1.539  | 0.502 | 0.002 | 0.495 |
| E | K | gii15610568 | 151 | 0.536 | 110.255 | -1.358 | 0.053 | 0.043 | 0.903 |
| E | K | gii15610572 | 544 | 0.361 | 74.299  | 1.43   | 0.97  | 0.001 | 0.03  |
| E | K | gii15610578 | 121 | 0.699 | 143.764 | 0.606  | 0.782 | 0.003 | 0.216 |
| E | K | gii15610578 | 48  | 0.445 | 91.516  | 1.586  | 0.001 | 0.9   | 0.099 |
| B | K | gii15610578 | 70  | 0.149 | 30.67   | 0.688  | 0.923 | 0.002 | 0.076 |
| E | K | gii15610579 | 86  | 0.463 | 95.219  | -0.148 | 0.021 | 0.279 | 0.699 |
| B | K | gii15610590 | 343 | 0.184 | 37.869  | 0.305  | 0.005 | 0.336 | 0.66  |
| E | K | gii15610593 | 213 | 0.399 | 82.115  | 1.264  | 0.97  | 0.001 | 0.03  |
| E | K | gii15610593 | 70  | 0.39  | 80.141  | 0.733  | 0.455 | 0.046 | 0.498 |
| E | K | gii15610593 | 173 | 0.339 | 69.835  | -0.279 | 0.018 | 0.846 | 0.136 |
| B | K | gii15610593 | 177 | 0.246 | 50.684  | 0.749  | 0.001 | 0.959 | 0.04  |
| E | K | gii15610593 | 292 | 0.475 | 97.728  | 1.309  | 0.622 | 0.015 | 0.363 |
| E | K | gii15610593 | 265 | 0.466 | 95.836  | 1.301  | 0.717 | 0.014 | 0.269 |
| E | K | gii15610594 | 42  | 0.382 | 78.66   | 0.076  | 0.115 | 0.016 | 0.868 |
| E | K | gii15610594 | 80  | 0.339 | 69.753  | -0.686 | 0.115 | 0.016 | 0.868 |
| B | K | gii15610595 | 91  | 0.239 | 49.142  | 1.391  | 0.001 | 0.959 | 0.04  |
| E | K | gii15610640 | 238 | 0.356 | 73.25   | 1.606  | 0.975 | 0.003 | 0.022 |
| E | K | gii15610646 | 209 | 0.528 | 108.568 | -0.908 | 0.018 | 0.047 | 0.935 |
| E | K | gii15610646 | 214 | 0.388 | 79.77   | 0.513  | 0.923 | 0.002 | 0.076 |
| B | K | gii15610652 | 139 | 0.222 | 45.645  | -0.256 | 0.199 | 0.152 | 0.649 |
| E | K | gii15610652 | 132 | 0.283 | 58.254  | 1.621  | 0.074 | 0.484 | 0.442 |
| E | K | gii15610655 | 206 | 0.561 | 115.377 | 0.415  | 0.43  | 0.016 | 0.555 |
| E | K | gii15610656 | 161 | 0.397 | 81.663  | -0.386 | 0.021 | 0.279 | 0.699 |
| E | K | gii15610656 | 115 | 0.488 | 100.299 | 0.882  | 0.321 | 0.003 | 0.675 |
| E | K | gii15610656 | 158 | 0.468 | 96.35   | -1.045 | 0.056 | 0.142 | 0.802 |
| E | K | gii15610671 | 172 | 0.43  | 88.451  | 0.988  | 0.923 | 0.002 | 0.076 |
| E | K | gii15610678 | 253 | 0.317 | 65.145  | -1.362 | 0.018 | 0.019 | 0.964 |
| E | K | gii15610684 | 150 | 0.467 | 96.144  | -0.824 | 0.113 | 0.043 | 0.844 |
| E | K | gii15610692 | 259 | 0.658 | 135.268 | 1.378  | 0.923 | 0.002 | 0.076 |
| E | K | gii15610692 | 325 | 0.576 | 118.504 | -0.749 | 0.016 | 0.005 | 0.979 |
| E | K | gii15610692 | 167 | 0.328 | 67.531  | 0.027  | 0.923 | 0.002 | 0.076 |
| E | K | gii15610699 | 179 | 0.315 | 64.878  | -0.114 | 0.858 | 0.002 | 0.139 |
| E | K | gii15610704 | 25  | 0.564 | 115.912 | 0.407  | 0.802 | 0.014 | 0.185 |
| E | K | gii15610704 | 33  | 0.591 | 121.507 | 0.081  | 0.023 | 0.655 | 0.322 |
| E | K | gii15610704 | 237 | 0.743 | 152.876 | 0.243  | 0.003 | 0.003 | 0.994 |
| E | K | gii15610704 | 89  | 0.364 | 74.916  | 0.099  | 0.002 | 0.816 | 0.182 |
| E | K | gii15610705 | 160 | 0.467 | 96.041  | 0.175  | 0.782 | 0.003 | 0.216 |
| B | K | gii15610705 | 97  | 0.188 | 38.692  | 1.609  | 0.97  | 0.001 | 0.03  |
| E | K | gii15610706 | 272 | 0.311 | 64.055  | 0.634  | 0.354 | 0.048 | 0.598 |
| B | K | gii15610706 | 274 | 0.168 | 34.66   | -0.387 | 0.455 | 0.046 | 0.498 |
| E | K | gii15610706 | 211 | 0.512 | 105.277 | -0.46  | 0.052 | 0.084 | 0.864 |
| E | K | gii15610706 | 198 | 0.369 | 75.862  | 0.881  | 0.004 | 0.616 | 0.381 |
| E | K | gii15610717 | 108 | 0.464 | 95.363  | 0.105  | 0.058 | 0.017 | 0.925 |
| E | K | gii15610719 | 90  | 0.592 | 121.774 | 1.351  | 0.97  | 0.001 | 0.03  |
| E | K | gii15610728 | 21  | 0.648 | 133.376 | 1.688  | 0.97  | 0.001 | 0.03  |
| E | K | gii15610733 | 49  | 0.394 | 81.108  | 1.164  | 0.858 | 0.002 | 0.139 |
| E | K | gii15610734 | 382 | 0.568 | 116.796 | -0.805 | 0.184 | 0.043 | 0.773 |
| E | K | gii15610736 | 25  | 0.49  | 100.834 | 0.287  | 0.066 | 0.296 | 0.638 |
| E | K | gii15610736 | 106 | 0.552 | 113.608 | 0.39   | 0.257 | 0.016 | 0.727 |
| E | K | gii15610745 | 128 | 0.428 | 87.957  | -0.146 | 0.502 | 0.002 | 0.495 |
| B | K | gii15610745 | 118 | 0.243 | 50.006  | -0.08  | 0.6   | 0.003 | 0.397 |
| E | K | gii15610764 | 136 | 0.345 | 70.925  | 1.384  | 0.023 | 0.655 | 0.322 |
| E | K | gii15610764 | 127 | 0.284 | 58.439  | 0.628  | 0.354 | 0.048 | 0.598 |
| E | K | gii15610764 | 91  | 0.256 | 52.556  | 0.858  | 0.004 | 0.514 | 0.481 |
| B | K | gii15610764 | 16  | 0.172 | 35.339  | 0.616  | 0.023 | 0.655 | 0.322 |
| B | K | gii15610764 | 120 | 0.24  | 49.286  | 1.535  | 0.988 | 0     | 0.012 |
| E | K | gii15610782 | 542 | 0.516 | 106.223 | 1.387  | 0.923 | 0.002 | 0.076 |
| E | K | gii15610782 | 189 | 0.39  | 80.285  | -0.85  | 0.018 | 0.047 | 0.935 |
| E | K | gii15610784 | 57  | 0.65  | 133.623 | 0.395  | 0.018 | 0.019 | 0.964 |
| E | K | gii15610803 | 193 | 0.492 | 101.143 | -0.105 | 0.113 | 0.087 | 0.8   |
| E | K | gii15610803 | 366 | 0.599 | 123.255 | 0.902  | 0.694 | 0.003 | 0.303 |
| E | K | gii15610805 | 157 | 0.478 | 98.304  | 0.356  | 0.113 | 0.043 | 0.844 |
| E | K | gii15610812 | 193 | 0.387 | 79.668  | 1.222  | 0.97  | 0.001 | 0.03  |
| E | K | gii15610812 | 209 | 0.429 | 88.328  | 0.463  | 0.005 | 0.045 | 0.951 |
| E | K | gii15610814 | 63  | 0.294 | 60.558  | 1.408  | 0.97  | 0.001 | 0.03  |
| E | K | gii15610814 | 46  | 0.545 | 112.148 | -1.069 | 0.018 | 0.088 | 0.893 |

|   |   |              |      |       |         |        |       |       |       |
|---|---|--------------|------|-------|---------|--------|-------|-------|-------|
| E | K | gii15610835  | 221  | 0.306 | 62.924  | 1.053  | 0.622 | 0.015 | 0.363 |
| B | K | gii15610852  | 43   | 0.218 | 44.863  | 2.228  | 0     | 0.983 | 0.017 |
| E | K | gii15610862  | 10   | 0.659 | 135.618 | 1.583  | 0.005 | 0.045 | 0.951 |
| B | K | gii15610870  | 149  | 0.208 | 42.827  | 0.642  | 0.97  | 0.001 | 0.03  |
| B | K | gii15610870  | 251  | 0.15  | 30.814  | -0.331 | 0.858 | 0.002 | 0.139 |
| E | K | gii15610891  | 171  | 0.277 | 56.917  | 1.139  | 0.018 | 0.846 | 0.136 |
| E | K | gii15610897  | 159  | 0.428 | 88.101  | -0.684 | 0.115 | 0.016 | 0.868 |
| E | K | gii15610910  | 179  | 0.448 | 92.133  | 0.493  | 0.018 | 0.047 | 0.935 |
| E | K | gii15610910  | 101  | 0.415 | 85.304  | 1.071  | 0.97  | 0.001 | 0.03  |
| E | K | gii15610910  | 142  | 0.297 | 61.093  | 1.58   | 0.148 | 0.418 | 0.435 |
| E | K | gii15610913  | 319  | 0.587 | 120.828 | 0.291  | 0.018 | 0.019 | 0.964 |
| B | K | gii15610913  | 176  | 0.09  | 18.554  | 0.185  | 0.923 | 0.002 | 0.076 |
| E | K | gii15610926  | 418  | 0.344 | 70.781  | -1.33  | 0.113 | 0.087 | 0.8   |
| E | K | gii15610927  | 56   | 0.469 | 96.391  | 1.575  | 0.923 | 0.002 | 0.076 |
| E | K | gii15610933  | 506  | 0.642 | 132.142 | -0.185 | 0.246 | 0.004 | 0.75  |
| E | K | gii15610936  | 1468 | 0.437 | 89.85   | -0.129 | 0.018 | 0.047 | 0.935 |
| E | K | gii15610936  | 687  | 0.585 | 120.355 | 1.208  | 0.923 | 0.002 | 0.076 |
| E | K | gii15610936  | 550  | 0.553 | 113.834 | -1.112 | 0.181 | 0.016 | 0.803 |
| E | K | gii15610936  | 181  | 0.523 | 107.519 | 0.241  | 0.052 | 0.084 | 0.864 |
| E | K | gii15610936  | 1065 | 0.477 | 98.078  | 0.083  | 0.056 | 0.142 | 0.802 |
| E | K | gii15610936  | 1018 | 0.403 | 82.856  | -1.413 | 0.018 | 0.019 | 0.964 |
| E | K | gii15610936  | 1412 | 0.341 | 70.185  | 0.783  | 0.923 | 0.002 | 0.076 |
| E | K | gii15610936  | 1551 | 0.347 | 71.398  | 0.789  | 0.018 | 0.019 | 0.964 |
| E | K | gii15610936  | 506  | 0.324 | 66.688  | 1.339  | 0.002 | 0.816 | 0.182 |
| E | K | gii15610936  | 33   | 0.58  | 119.347 | 1.361  | 0.97  | 0.001 | 0.03  |
| E | K | gii15610936  | 947  | 0.498 | 102.459 | -0.949 | 0.113 | 0.043 | 0.844 |
| E | K | gii15610937  | 35   | 0.412 | 84.687  | 1.674  | 0.97  | 0.001 | 0.03  |
| E | K | gii15610937  | 492  | 0.452 | 92.915  | 0.178  | 0.113 | 0.087 | 0.8   |
| B | K | gii15610937  | 43   | 0.218 | 44.822  | 1.152  | 0.004 | 0.138 | 0.858 |
| E | K | gii15610945  | 354  | 0.254 | 52.33   | 0.349  | 0.005 | 0.015 | 0.979 |
| B | K | gii15610950  | 130  | 0.186 | 38.342  | 0.01   | 0.339 | 0.016 | 0.645 |
| E | K | gii15610955  | 30   | 0.438 | 90.097  | 0.427  | 0.021 | 0.451 | 0.528 |
| E | K | gii15610961  | 385  | 0.348 | 71.522  | 0.607  | 0.6   | 0.003 | 0.397 |
| E | K | gii15610974  | 306  | 0.512 | 105.216 | 0.018  | 0.018 | 0.047 | 0.935 |
| E | K | gii15610982  | 31   | 0.441 | 90.755  | 0.95   | 0.782 | 0.003 | 0.216 |
| E | K | gii15610982  | 38   | 0.468 | 96.35   | 1.436  | 0.97  | 0.001 | 0.03  |
| E | K | gii15610982  | 53   | 0.496 | 101.986 | -0.271 | 0.181 | 0.016 | 0.803 |
| E | K | gii15610982  | 46   | 0.556 | 114.328 | 0.545  | 0.6   | 0.003 | 0.397 |
| E | K | gii15610982  | 90   | 0.531 | 109.288 | -0.928 | 0.005 | 0.015 | 0.979 |
| E | K | gii15610982  | 108  | 0.452 | 92.935  | 2.135  | 0.97  | 0.001 | 0.03  |
| B | K | gii15610982  | 174  | 0.183 | 37.725  | 0.535  | 0.782 | 0.003 | 0.216 |
| E | K | gii15610982  | 179  | 0.531 | 109.247 | 1.668  | 0.988 | 0     | 0.012 |
| E | K | gii15610985  | 83   | 0.418 | 85.983  | 1.4    | 0.858 | 0.002 | 0.139 |
| E | K | gii15610985  | 116  | 0.274 | 56.382  | 1.756  | 0.97  | 0.001 | 0.03  |
| E | K | gii15610985  | 71   | 0.356 | 73.229  | 1.074  | 0.005 | 0.015 | 0.979 |
| E | K | gii15610986  | 33   | 0.535 | 110.111 | 0.678  | 0.6   | 0.003 | 0.397 |
| E | K | gii15610988  | 58   | 0.48  | 98.777  | -0.36  | 0.115 | 0.016 | 0.868 |
| E | K | gii15610994  | 9    | 0.597 | 122.7   | 0.234  | 0.056 | 0.142 | 0.802 |
| E | K | gii15610994  | 419  | 0.491 | 101.019 | 0.944  | 0.023 | 0.655 | 0.322 |
| E | K | gii15610995  | 728  | 0.321 | 66.112  | 1.34   | 0.923 | 0.002 | 0.076 |
| B | K | gii15610995  | 732  | 0.224 | 46.118  | 1.103  | 0.97  | 0.001 | 0.03  |
| E | K | gii15610995  | 863  | 0.336 | 69.197  | 0.198  | 0.148 | 0.418 | 0.435 |
| E | K | gii15610995  | 926  | 0.443 | 91.228  | -1.015 | 0.278 | 0.093 | 0.628 |
| E | K | gii15610995  | 839  | 0.669 | 137.593 | 0.925  | 0.97  | 0.001 | 0.03  |
| E | K | gii15611000  | 118  | 0.309 | 63.664  | 0.111  | 0.701 | 0.107 | 0.192 |
| E | K | gii15611016  | 67   | 0.447 | 92.03   | 0.452  | 0.858 | 0.002 | 0.139 |
| E | K | gii15611017  | 259  | 0.569 | 116.94  | 1.1    | 0.97  | 0.001 | 0.03  |
| E | K | gii15611017  | 267  | 0.632 | 129.961 | -2.118 | 0.016 | 0.005 | 0.979 |
| E | K | gii15611017  | 134  | 0.377 | 77.631  | 1.088  | 0.923 | 0.002 | 0.076 |
| B | K | gii15611050  | 62   | 0.192 | 39.412  | 0.673  | 0.001 | 0.959 | 0.04  |
| E | K | gii15611050  | 101  | 0.396 | 81.457  | 1.26   | 0.923 | 0.002 | 0.076 |
| E | K | gii15611050  | 6    | 0.658 | 135.309 | 0.5    | 0.058 | 0.017 | 0.925 |
| E | K | gii161352467 | 1087 | 0.607 | 124.778 | 0.425  | 0.354 | 0.048 | 0.598 |
| E | K | gii161352467 | 1093 | 0.46  | 94.622  | 0.905  | 0.019 | 0.141 | 0.84  |
| E | K | gii161352467 | 116  | 0.507 | 104.228 | 1.429  | 0.97  | 0.001 | 0.03  |
| E | K | gii161352467 | 156  | 0.344 | 70.74   | 0.869  | 0.021 | 0.279 | 0.699 |
| E | K | gii161352467 | 1080 | 0.491 | 100.999 | 0.245  | 0.184 | 0.043 | 0.773 |
| E | K | gii161352467 | 475  | 0.62  | 127.596 | 0.479  | 0.018 | 0.019 | 0.964 |
| E | K | gii161352467 | 482  | 0.271 | 55.765  | 1.814  | 0.97  | 0.001 | 0.03  |
| E | K | gii161352467 | 187  | 0.439 | 90.343  | 0.043  | 0.004 | 0.138 | 0.858 |
| E | K | gii161352467 | 207  | 0.576 | 118.483 | -2.373 | 0.018 | 0.019 | 0.964 |
| E | K | gii161352467 | 306  | 0.352 | 72.345  | -0.305 | 0.023 | 0.655 | 0.322 |
| E | K | gii161352467 | 150  | 0.545 | 112.065 | 0.48   | 0.694 | 0.003 | 0.303 |
| E | K | gii161352467 | 776  | 0.612 | 125.888 | 1.264  | 0.97  | 0.001 | 0.03  |
| E | K | gii161352467 | 1200 | 0.317 | 65.31   | 0.975  | 0.001 | 0.9   | 0.099 |
| E | K | gii161352467 | 472  | 0.461 | 94.807  | -0.587 | 0.246 | 0.004 | 0.75  |
| E | K | gii161352467 | 870  | 0.524 | 107.766 | 1.647  | 0.97  | 0.001 | 0.03  |
| E | K | gii345462027 | 442  | 0.357 | 73.517  | 1.029  | 0.97  | 0.001 | 0.03  |
| B | K | gii345462027 | 434  | 0.241 | 49.512  | 0.303  | 0.858 | 0.002 | 0.139 |
| E | K | gii448816588 | 539  | 0.417 | 85.797  | -0.064 | 0.43  | 0.016 | 0.555 |
| E | K | gii448824735 | 596  | 0.695 | 142.9   | 0.653  | 0.694 | 0.003 | 0.303 |
| E | K | gii448824735 | 484  | 0.318 | 65.371  | -0.043 | 0.022 | 0.359 | 0.619 |
| E | K | gii448824735 | 603  | 0.601 | 123.667 | -0.554 | 0.113 | 0.043 | 0.844 |
| E | K | gii448824735 | 600  | 0.566 | 116.447 | 0.22   | 0.199 | 0.152 | 0.649 |
| E | K | gii448824735 | 452  | 0.463 | 95.198  | 0.908  | 0.019 | 0.141 | 0.84  |
| E | K | gii448824735 | 381  | 0.345 | 70.925  | 0.154  | 0.717 | 0.014 | 0.269 |
| E | K | gii448824735 | 386  | 0.46  | 94.663  | 0.595  | 0.923 | 0.002 | 0.076 |
| E | K | gii448824735 | 404  | 0.428 | 87.937  | 1.653  | 0.97  | 0.001 | 0.03  |
| E | K | gii448824735 | 498  | 0.489 | 100.505 | 0.22   | 0.694 | 0.003 | 0.303 |
| B | K | gii448824753 | 80   | 0.148 | 30.382  | 0.973  | 0.97  | 0.001 | 0.03  |
| B | K | gii448824753 | 166  | 0.148 | 30.361  | 1.107  | 0.005 | 0.336 | 0.66  |
| B | K | gii448824753 | 272  | 0.218 | 44.904  | 0.231  | 0.97  | 0.001 | 0.03  |
| E | K | gii448824753 | 245  | 0.529 | 108.774 | 0.978  | 0.938 | 0.007 | 0.055 |
| B | K | gii448824753 | 240  | 0.189 | 38.836  | 0.407  | 0.004 | 0.197 | 0.799 |
| E | K | gii448824754 | 57   | 0.513 | 105.483 | 0.387  | 0.782 | 0.003 | 0.216 |
| E | K | gii448824757 | 30   | 0.485 | 99.662  | 1.469  | 0.923 | 0.002 | 0.076 |
| B | K | gii448824761 | 31   | 0.195 | 40.111  | 1.598  | 0.97  | 0.001 | 0.03  |
| E | K | gii448824762 | 157  | 0.531 | 109.144 | 0.421  | 0.782 | 0.003 | 0.216 |
| B | K | gii448824769 | 153  | 0.211 | 43.423  | 0.517  | 0.694 | 0.003 | 0.303 |
| E | K | gii448824769 | 45   | 0.609 | 125.271 | 1.367  | 0.858 | 0.002 | 0.139 |
| E | K | gii448824781 | 381  | 0.425 | 87.361  | -1.372 | 0.246 | 0.004 | 0.75  |



|   |   |              |     |       |         |        |       |       |       |
|---|---|--------------|-----|-------|---------|--------|-------|-------|-------|
| E | K | gii448824781 | 490 | 0.406 | 83.576  | -0.455 | 0.522 | 0.016 | 0.462 |
| B | K | gii448824781 | 514 | 0.203 | 41.86   | -0.107 | 0.406 | 0.004 | 0.59  |
| E | K | gii448824781 | 412 | 0.397 | 81.745  | -0.834 | 0.053 | 0.043 | 0.903 |
| E | K | gii448824781 | 475 | 0.528 | 108.692 | -0.519 | 0.268 | 0.043 | 0.689 |
| B | K | gii448824781 | 508 | 0.211 | 43.444  | 0.466  | 0.988 | 0     | 0.012 |
| E | K | gii448824781 | 393 | 0.287 | 58.995  | 0.271  | 0.021 | 0.451 | 0.528 |
| E | K | gii448824785 | 105 | 0.409 | 84.111  | -0.995 | 0.018 | 0.088 | 0.893 |
| E | K | gii448824785 | 418 | 0.582 | 119.738 | 0.835  | 0.923 | 0.002 | 0.076 |
| E | K | gii448824790 | 41  | 0.257 | 52.783  | 1.513  | 0.97  | 0.001 | 0.03  |
| E | K | gii448824790 | 22  | 0.401 | 82.568  | -0.338 | 0.113 | 0.043 | 0.844 |
| E | K | gii448824790 | 167 | 0.58  | 119.368 | 1.273  | 0.858 | 0.002 | 0.139 |
| E | K | gii448824795 | 171 | 0.332 | 68.272  | 0.608  | 0.018 | 0.846 | 0.136 |
| B | K | gii448824795 | 42  | 0.184 | 37.808  | 0.232  | 0.019 | 0.141 | 0.84  |
| B | K | gii448824796 | 178 | 0.236 | 48.545  | -0.066 | 0.268 | 0.505 | 0.227 |
| E | K | gii448824796 | 287 | 0.418 | 86.065  | 1.53   | 0.97  | 0.001 | 0.03  |
| E | K | gii448824796 | 297 | 0.582 | 119.656 | 0.402  | 0.858 | 0.002 | 0.139 |
| E | K | gii448824796 | 167 | 0.287 | 58.974  | 0.326  | 0.879 | 0.01  | 0.111 |
| B | K | gii448824796 | 16  | 0.247 | 50.87   | 1.524  | 0.004 | 0.514 | 0.481 |
| E | K | gii448824796 | 142 | 0.468 | 96.35   | -0.045 | 0.018 | 0.019 | 0.964 |
| E | K | gii448824796 | 316 | 0.486 | 99.908  | 2.021  | 0.988 | 0     | 0.012 |
| E | K | gii448824796 | 53  | 0.393 | 80.881  | 1.965  | 0.97  | 0.001 | 0.03  |
| E | K | gii448824796 | 45  | 0.335 | 69.012  | 0.705  | 0.004 | 0.42  | 0.576 |
| E | K | gii448824797 | 19  | 0.476 | 98.016  | 0.292  | 0.053 | 0.005 | 0.942 |
| E | K | gii448824799 | 90  | 0.743 | 152.897 | -1.419 | 0.003 | 0.003 | 0.994 |
| B | K | gii448824809 | 110 | 0.124 | 25.486  | 0.861  | 0.97  | 0.001 | 0.03  |
| B | K | gii448824818 | 403 | 0.142 | 29.168  | 1.135  | 0.004 | 0.514 | 0.481 |
| E | K | gii448824818 | 227 | 0.543 | 111.798 | 1.834  | 0.97  | 0.001 | 0.03  |
| E | K | gii57116682  | 139 | 0.703 | 144.587 | 0.444  | 0.052 | 0.084 | 0.864 |
| E | K | gii57116686  | 19  | 0.402 | 82.671  | 0.292  | 0.004 | 0.085 | 0.91  |
| E | K | gii57116686  | 25  | 0.575 | 118.195 | 0.364  | 0.018 | 0.047 | 0.935 |
| E | K | gii57116686  | 26  | 0.691 | 142.159 | 0.605  | 0.018 | 0.019 | 0.964 |
| E | K | gii57116686  | 13  | 0.534 | 109.782 | -0.694 | 0.058 | 0.017 | 0.925 |
| E | K | gii57116686  | 16  | 0.455 | 93.655  | -0.575 | 0.018 | 0.019 | 0.964 |
| B | K | gii57116704  | 140 | 0.19  | 39.145  | 0.528  | 0.97  | 0.001 | 0.03  |
| E | K | gii57116704  | 372 | 0.577 | 118.709 | 1.921  | 0.97  | 0.001 | 0.03  |
| E | K | gii57116724  | 234 | 0.69  | 141.995 | -1.16  | 0.018 | 0.047 | 0.935 |
| E | K | gii57116727  | 58  | 0.3   | 61.772  | 1.257  | 0.001 | 0.959 | 0.04  |
| E | K | gii57116727  | 64  | 0.359 | 73.887  | 1.106  | 0.001 | 0.959 | 0.04  |
| E | K | gii57116727  | 5   | 0.314 | 64.508  | 0.81   | 0.011 | 0.918 | 0.071 |
| B | K | gii57116727  | 52  | 0.208 | 42.724  | 0.105  | 0.001 | 0.9   | 0.099 |
| E | K | gii57116734  | 334 | 0.525 | 107.951 | 1.303  | 0.97  | 0.001 | 0.03  |
| E | K | gii57116734  | 322 | 0.419 | 86.271  | -0.64  | 0.181 | 0.016 | 0.803 |
| E | K | gii57116735  | 223 | 0.443 | 91.125  | 0.613  | 0.011 | 0.918 | 0.071 |
| E | K | gii57116735  | 108 | 0.763 | 156.97  | 0.847  | 0.782 | 0.003 | 0.216 |
| E | K | gii57116739  | 101 | 0.238 | 49.039  | 1.11   | 0.923 | 0.002 | 0.076 |
| E | K | gii57116739  | 176 | 0.396 | 81.395  | 1.371  | 0.005 | 0.015 | 0.979 |
| E | K | gii57116747  | 343 | 0.595 | 122.392 | 1.488  | 0.858 | 0.002 | 0.139 |
| E | K | gii57116747  | 514 | 0.35  | 72.057  | 1.065  | 0.858 | 0.002 | 0.139 |
| E | K | gii57116747  | 304 | 0.28  | 57.534  | 0.06   | 0.074 | 0.484 | 0.442 |
| E | K | gii57116764  | 47  | 0.53  | 109.103 | 1.091  | 0.056 | 0.142 | 0.802 |
| E | K | gii57116764  | 19  | 0.522 | 107.437 | -0.312 | 0.056 | 0.142 | 0.802 |
| E | K | gii57116767  | 181 | 0.481 | 98.942  | 1.17   | 0.176 | 0.004 | 0.82  |
| E | K | gii57116768  | 4   | 0.626 | 128.85  | 0.546  | 0.694 | 0.003 | 0.303 |
| E | K | gii57116768  | 482 | 0.607 | 124.86  | 0.485  | 0.005 | 0.045 | 0.951 |
| E | K | gii57116768  | 504 | 0.499 | 102.603 | -0.609 | 0.074 | 0.484 | 0.442 |
| E | K | gii57116768  | 359 | 0.419 | 86.168  | 0.698  | 0.021 | 0.756 | 0.223 |
| E | K | gii57116768  | 218 | 0.306 | 63.006  | 0.337  | 0.938 | 0.007 | 0.055 |
| E | K | gii57116779  | 362 | 0.513 | 105.462 | 1.022  | 0.005 | 0.045 | 0.951 |
| E | K | gii57116779  | 332 | 0.5   | 102.809 | 0.471  | 0.923 | 0.002 | 0.076 |
| E | K | gii57116784  | 143 | 0.304 | 62.512  | -0.153 | 0.004 | 0.42  | 0.576 |
| E | K | gii57116786  | 284 | 0.43  | 88.554  | 1.831  | 0.97  | 0.001 | 0.03  |
| E | K | gii57116786  | 30  | 0.582 | 119.779 | 0.447  | 0.113 | 0.043 | 0.844 |
| E | K | gii57116786  | 20  | 0.601 | 123.687 | 0.938  | 0.858 | 0.002 | 0.139 |
| E | K | gii57116786  | 179 | 0.604 | 124.263 | 1.593  | 0.923 | 0.002 | 0.076 |
| E | K | gii57116786  | 4   | 0.575 | 118.236 | 1.115  | 0.053 | 0.005 | 0.942 |
| E | K | gii57116786  | 131 | 0.518 | 106.573 | 1.38   | 0.97  | 0.001 | 0.03  |
| E | K | gii57116786  | 328 | 0.462 | 95.095  | -0.248 | 0.216 | 0.235 | 0.548 |
| E | K | gii57116800  | 190 | 0.415 | 85.263  | -1.61  | 0.053 | 0.005 | 0.942 |
| E | K | gii57116808  | 56  | 0.751 | 154.522 | 0.528  | 0.053 | 0.043 | 0.903 |
| E | K | gii57116810  | 337 | 0.343 | 70.473  | 0.095  | 0.005 | 0.015 | 0.979 |
| E | K | gii57116820  | 401 | 0.497 | 102.171 | 0.593  | 0.115 | 0.016 | 0.868 |
| E | K | gii57116820  | 97  | 0.627 | 128.933 | -0.31  | 0.016 | 0.005 | 0.979 |
| B | K | gii57116820  | 102 | 0.117 | 24.005  | 1.021  | 0.97  | 0.001 | 0.03  |
| E | K | gii57116820  | 428 | 0.509 | 104.742 | 1.634  | 0.923 | 0.002 | 0.076 |
| E | K | gii57116829  | 53  | 0.623 | 128.213 | 1.111  | 0.694 | 0.003 | 0.303 |
| E | K | gii57116832  | 218 | 0.404 | 83.041  | -0.644 | 0.199 | 0.152 | 0.649 |
| E | K | gii57116835  | 31  | 0.446 | 91.763  | 1.484  | 0.001 | 0.959 | 0.04  |
| E | K | gii57116856  | 138 | 0.303 | 62.286  | 2.227  | 0.97  | 0.001 | 0.03  |
| E | K | gii57116903  | 65  | 0.784 | 161.269 | 0.794  | 0.109 | 0.005 | 0.886 |
| E | K | gii57116903  | 352 | 0.439 | 90.385  | 2.027  | 0.002 | 0.816 | 0.182 |
| E | K | gii57116903  | 298 | 0.475 | 97.707  | 1.184  | 0.354 | 0.048 | 0.598 |
| E | K | gii57116903  | 19  | 0.471 | 96.782  | 0.959  | 0.022 | 0.552 | 0.426 |
| E | K | gii57116956  | 24  | 0.467 | 96.041  | 0.093  | 0.339 | 0.016 | 0.645 |
| E | K | gii57116972  | 134 | 0.705 | 144.957 | 1.693  | 0.923 | 0.002 | 0.076 |
| E | K | gii57116987  | 332 | 0.304 | 62.533  | 1.516  | 0.001 | 0.959 | 0.04  |
| B | K | gii57116987  | 234 | 0.254 | 52.31   | -0.407 | 0.005 | 0.336 | 0.66  |
| E | K | gii57116987  | 378 | 0.398 | 81.869  | 0.076  | 0.005 | 0.045 | 0.951 |
| B | K | gii57116990  | 635 | 0.199 | 40.934  | 0.454  | 0.428 | 0.171 | 0.402 |
| E | K | gii57116990  | 414 | 0.468 | 96.247  | 2.227  | 0.97  | 0.001 | 0.03  |
| E | K | gii57116993  | 26  | 0.581 | 119.491 | 1.823  | 0.858 | 0.002 | 0.139 |
| B | K | gii57116994  | 781 | 0.246 | 50.602  | 0.906  | 0.97  | 0.001 | 0.03  |
| B | K | gii57116994  | 530 | 0.188 | 38.713  | -0.976 | 0.005 | 0.336 | 0.66  |
| E | K | gii57116994  | 243 | 0.714 | 146.89  | 1.099  | 0.923 | 0.002 | 0.076 |
| E | K | gii57117015  | 188 | 0.687 | 141.295 | -0.329 | 0.018 | 0.088 | 0.893 |
| E | K | gii57117016  | 167 | 0.367 | 75.533  | -0.025 | 0.135 | 0.317 | 0.548 |
| B | K | gii57117019  | 147 | 0.197 | 40.523  | 0.295  | 0.97  | 0.001 | 0.03  |
| E | K | gii57117019  | 71  | 0.58  | 119.327 | 1.942  | 0.923 | 0.002 | 0.076 |
| E | K | gii57117031  | 175 | 0.307 | 63.191  | 1.515  | 0.502 | 0.002 | 0.495 |
| E | K | gii57117031  | 66  | 0.637 | 131.093 | 1.591  | 0.923 | 0.002 | 0.076 |
| E | K | gii57117036  | 203 | 0.633 | 130.126 | 1.769  | 0.923 | 0.002 | 0.076 |
| E | K | gii57117037  | 59  | 0.465 | 95.753  | 2.523  | 0.97  | 0.001 | 0.03  |

|   |   |            |     |       |         |        |       |       |       |
|---|---|------------|-----|-------|---------|--------|-------|-------|-------|
| E | K | gi57117041 | 443 | 0.534 | 109.782 | -0.178 | 0.018 | 0.019 | 0.964 |
| E | K | gi57117041 | 396 | 0.653 | 134.384 | -0.35  | 0.858 | 0.002 | 0.139 |
| B | K | gi57117041 | 243 | 0.232 | 47.64   | -0.103 | 0.453 | 0.248 | 0.299 |
| B | K | gi57117042 | 205 | 0.251 | 51.651  | -0.702 | 0.018 | 0.019 | 0.964 |
| E | K | gi57117042 | 220 | 0.455 | 93.532  | 1.736  | 0.694 | 0.003 | 0.303 |
| E | K | gi57117042 | 401 | 0.456 | 93.758  | 0.983  | 0.001 | 0.9   | 0.099 |
| E | K | gi57117042 | 11  | 0.591 | 121.548 | 0.959  | 0.005 | 0.015 | 0.979 |
| E | K | gi57117044 | 233 | 0.579 | 119.059 | 2.137  | 0.97  | 0.001 | 0.03  |
| E | K | gi57117044 | 218 | 0.551 | 113.423 | -0.921 | 0.115 | 0.016 | 0.868 |
| E | K | gi57117044 | 13  | 0.421 | 86.682  | -0.435 | 0.053 | 0.043 | 0.903 |
| E | K | gi57117051 | 23  | 0.37  | 76.212  | 0.851  | 0.858 | 0.002 | 0.139 |
| E | K | gi57117069 | 33  | 0.598 | 123.07  | 0.769  | 0.694 | 0.003 | 0.303 |
| E | K | gi57117073 | 4   | 0.354 | 72.715  | 1.047  | 0.001 | 0.9   | 0.099 |
| E | K | gi57117081 | 15  | 0.504 | 103.693 | 0.156  | 0.052 | 0.084 | 0.864 |
| E | K | gi57117086 | 54  | 0.388 | 79.873  | 0.623  | 0.001 | 0.959 | 0.04  |
| E | K | gi57117125 | 236 | 0.497 | 102.192 | 1.7    | 0.001 | 0.959 | 0.04  |
| E | K | gi57117128 | 82  | 0.253 | 51.96   | 0.897  | 0.97  | 0.001 | 0.03  |
| E | K | gi57117128 | 78  | 0.408 | 84.028  | 1.288  | 0.923 | 0.002 | 0.076 |
| E | K | gi57117131 | 761 | 0.629 | 129.282 | 1.765  | 0.97  | 0.001 | 0.03  |
| E | K | gi57117131 | 126 | 0.635 | 130.681 | 0.536  | 0.858 | 0.002 | 0.139 |
| E | K | gi57117131 | 195 | 0.58  | 119.347 | 1.275  | 0.923 | 0.002 | 0.076 |
| E | K | gi57117131 | 86  | 0.467 | 96.144  | 2.113  | 0.988 | 0     | 0.012 |
| E | K | gi57117131 | 274 | 0.543 | 111.777 | 1.811  | 0.97  | 0.001 | 0.03  |
| E | K | gi57117131 | 743 | 0.561 | 115.418 | 0.88   | 0.858 | 0.002 | 0.139 |
| E | K | gi57117131 | 702 | 0.527 | 108.322 | 0.455  | 0.858 | 0.002 | 0.139 |
| E | K | gi57117137 | 244 | 0.536 | 110.193 | -0.07  | 0.018 | 0.019 | 0.964 |
| E | K | gi57117137 | 276 | 0.416 | 85.653  | 0.834  | 0.386 | 0.097 | 0.517 |
| E | K | gi57117147 | 38  | 0.284 | 58.419  | 0.281  | 0.005 | 0.015 | 0.979 |
| E | K | gi57117147 | 384 | 0.668 | 137.366 | -0.931 | 0.018 | 0.047 | 0.935 |
| E | K | gi57117147 | 337 | 0.415 | 85.407  | -1.451 | 0.005 | 0.045 | 0.951 |
| E | K | gi57117147 | 242 | 0.506 | 104.043 | -0.982 | 0.522 | 0.016 | 0.462 |
| E | K | gi57117168 | 325 | 0.58  | 119.388 | 0.837  | 0.923 | 0.002 | 0.076 |
| B | K | gi57117168 | 266 | 0.25  | 51.322  | -0.161 | 0.561 | 0.047 | 0.393 |
