# Supplementary material
Source: PubMed Central journal article supplement (PMC4390261)
Supplement: supp_M114.045922_mcp.M114.045922-7.pdf [file supp_M114.045922_mcp.M114.045922-7.pdf]

**Table S6. List of succinylated proteins and their interacting proteins.**

|           |    |         |
|-----------|----|---------|
| PE_PGRS45 | pp | amiA1   |
| Rv1097c   | pp | dapB    |
| echA10    | pp | corA    |
| modB      | pp | ahpD    |
| vapB8     | pp | icd1    |
| ribG      | pp | Rv3716c |
| Rv1372    | pp | rpoA    |
| ephC      | pp | Rv2159c |
| Rv2141c   | pp | citE    |
| lipP      | pp | folD    |
| nuoD      | pp | galE1   |
| Rv0177    | pp | fas     |
| relF      | pp | glpD2   |
| Rv1889c   | pp | dapB    |
| mazE3     | pp | ltp1    |
| Rv0146    | pp | hadB    |
| Rv0612    | pp | hupB    |
| Rv0826    | pp | Rv2781c |
| Rv1149    | pp | Rv1558  |
| Rv0455c   | pp | acg     |
| Rv0330c   | pp | fadE7   |
| Rv0309    | pp | dapB    |
| moeY      | pp | Rv1978  |
| lpqS      | pp | trpC    |
| Rv2401    | pp | folD    |
| Rv1725c   | pp | Rv2477c |
| ribA1     | pp | purE    |
| Rv0004    | pp | Rv0566c |
| lprJ      | pp | hupB    |
| fadD30    | pp | Rv3814c |
| Rv1761c   | pp | Rv2991  |
| Rv0061    | pp | nuoE    |
| Rv1192    | pp | efp     |
| Rv0499    | pp | rpsJ    |
| Rv1717    | pp | fas     |
| mbtK      | pp | Rv2765  |
| Rv1524    | pp | sigH    |
| Rv2302    | pp | mapB    |
| Rv1109c   | pp | Rv3814c |
| rocD1     | pp | Rv3094c |
| mtrB      | pp | mtrA    |
| Rv0544c   | pp | dapB    |
| Rv0199    | pp | Rv3131  |
| Rv0274    | pp | umaA    |
| hisF      | pp | ideR    |
| Rv3190c   | pp | Rv3583c |
| secG      | pp | mpt64   |
| secG      | pp | viuB    |
| Rv2342    | pp | orn     |
| Rv0203    | pp | tig     |
| Rv2670c   | pp | aroA    |
| Rv1729c   | pp | Rv1869c |
| Rv1831    | pp | prcA    |
| Rv2228c   | pp | rplU    |
| aceAa     | pp | devR    |
| Rv2989    | pp | icd1    |
| Rv0349    | pp | dapB    |
| Rv0207c   | pp | end     |
| lprL      | pp | dapB    |
| Rv1425    | pp | folD    |
| Rv2971    | pp | Rv3520c |
| Rv1456c   | pp | Rv2993c |
| parD1     | pp | entC    |
| parD1     | pp | Rv3755c |
| murI      | pp | inhA    |
| murI      | pp | Rv3699  |
| Rv1116    | pp | fadE22  |
| Rv0281    | pp | gcvT    |
| rpmB1     | pp | Rv2477c |
| menD      | pp | Rv2298  |
| mez       | pp | scoB    |
| Rv0139    | pp | Rv1324  |
| Rv0615    | pp | wag31   |
| Rv2288    | pp | gpgP    |
| Rv1515c   | pp | dapA    |
| mesT      | pp | hsaG    |
| Rv2286c   | pp | accD5   |
| Rv0480c   | pp | pheS    |
| hsdS      | pp | folD    |

|         |    |         |
|---------|----|---------|
| Rv2751  | pp | echA21  |
| Rv0375c | pp | dapB    |
| TB18.5  | pp | Rv0466  |
| Rv1035c | pp | qcrA    |
| Rv1684  | pp | folD    |
| Rv1684  | pp | dapB    |
| Rv0613c | pp | trpS    |
| mazE2   | pp | mutA    |
| papA4   | pp | amiA1   |
| Rv2507  | pp | dapB    |
| far     | pp | pdxH    |
| Rv0561c | pp | cmaA1   |
| Rv2361c | pp | ispF    |
| Rv0367c | pp | dapB    |
| Rv0367c | pp | eis     |
| rocA    | pp | purE    |
| lprQ    | pp | sseA    |
| Rv2087  | pp | rplM    |
| Rv2015c | pp | prcA    |
| Rv1722  | pp | topA    |
| adh     | pp | prcA    |
| PPE41   | pp | Rv2475c |
| idsA2   | pp | Rv3583c |
| Rv0901  | pp | ltp1    |
| Rv0901  | pp | dapB    |
| Rv1290A | pp | cmaA1   |
| PE31    | pp | Rv3669  |
| Rv3438  | pp | Rv3600c |
| pknE    | pp | Rv2474c |
| sigB    | pp | gatA    |
| Rv2035  | pp | acpM    |
| Rv2035  | pp | icd1    |
| trxA    | pp | polA    |
| ureC    | pp | Rv3678c |
| Rv0197  | pp | ceoC    |
| esxO    | pp | citE    |
| Rv0075  | pp | Rv1762c |
| pip     | pp | Rv1144  |
| TB22.2  | pp | Rv3600c |
| Rv0316  | pp | leuA    |
| Rv0749A | pp | icd1    |
| Rv0818  | pp | echA6   |
| Rv1147  | pp | Rv2230c |
| Rv2434c | pp | Rv2991  |
| fabD2   | pp | Rv1155  |
| Rv2227  | pp | hupB    |
| Rv0863  | pp | Rv3777  |
| Rv0863  | pp | Rv2083  |
| Rv0863  | pp | echA7   |
| Rv3207c | pp | Rv3210c |
| thiE    | pp | ahpC    |
| thiE    | pp | tpx     |
| thiE    | pp | nuoF    |
| aftC    | pp | ppa     |
| mpt53   | pp | ppa     |
| Rv0784  | pp | Rv3094c |
| Rv0358  | pp | Rv1738  |
| Rv1233c | pp | viuB    |
| Rv1139c | pp | dapB    |
| pknJ    | pp | dnaJ2   |
| pknJ    | pp | kasA    |
| Rv1588c | pp | Rv2475c |
| Rv2090  | pp | prcA    |
| Rv0964c | pp | scoB    |
| Rv0712  | pp | dapB    |
| Rv0205  | pp | amiA1   |
| Rv0205  | pp | ahpD    |
| Rv2700  | pp | dapB    |
| Rv0459  | pp | Rv3510c |
| fhaA    | pp | Rv1144  |
| vapB41  | pp | rplM    |
| hycP    | pp | hspX    |
| Rv2719c | pp | dapA    |
| vapC4   | pp | acyP    |
| Rv1904  | pp | echA15  |
| Rv1904  | pp | tgs4    |
| rbsK    | pp | topA    |
| Rv0669c | pp | Rv3131  |
| Rv0669c | pp | echA5   |
| Rv0523c | pp | dapB    |
| Rv0523c | pp | ilvE    |

|         |    |         |
|---------|----|---------|
| aroK    | pp | dapB    |
| yrbE1B  | pp | Rv2475c |
| yrbE1B  | pp | TB18.6  |
| Rv0158  | pp | bcp     |
| Rv0158  | pp | Rv0953c |
| Rv1586c | pp | accA3   |
| Rv2023c | pp | cmaA1   |
| Rv0204c | pp | Rv2765  |
| PPE26   | pp | Rv2581c |
| Rv0958  | pp | cmaA1   |
| betP    | pp | dapB    |
| malQ    | pp | Rv3131  |
| celA2a  | pp | aroA    |
| Rv2808  | pp | rplM    |
| Rv0397  | pp | Rv1025  |
| mce1R   | pp | rplC    |
| Rv1417  | pp | Rv3311  |
| Rv0421c | pp | bfrA    |
| hsdM    | pp | folD    |
| iniA    | pp | manA    |
| Rv3304  | pp | trxC    |
| dnaE1   | pp | Rv2005c |
| Rv0340  | pp | rpsI    |
| lrpA    | pp | Rv3519  |
| kdpE    | pp | Rv2474c |
| sigF    | pp | Rv3548c |
| mmuM    | pp | aroA    |
| Rv1882c | pp | acyP    |
| Rv1882c | pp | dapB    |
| Rv0495c | pp | rplO    |
| Rv0495c | pp | aroB    |
| xseA    | pp | nadC    |
| PE3     | pp | nadC    |
| Rv0877  | pp | Rv1025  |
| Rv0877  | pp | Rv3819  |
| lipX    | pp | dapB    |
| Rv2506  | pp | dapB    |
| cycA    | pp | Rv2991  |
| cobT    | pp | dapB    |
| lpqJ    | pp | aroD    |
| Rv2795c | pp | viuB    |
| Rv2795c | pp | rpsI    |
| fadD1   | pp | rpsT    |
| fadD1   | pp | Rv2475c |
| Rv1371  | pp | Rv3669  |
| Rv3015c | pp | accD5   |
| pknL    | pp | dnaJ2   |
| Rv1179c | pp | Rv3169  |
| Rv3430c | pp | rpsI    |
| Rv2170  | pp | hupB    |
| Rv0881  | pp | gltD    |
| Rv0881  | pp | echA21  |
| Rv0881  | pp | hisB    |
| Rv1200  | pp | prcA    |
| Rv1865c | pp | Rv2161c |
| Rv1865c | pp | tgs4    |
| Rv2631  | pp | cmaA1   |
| Rv1478  | pp | viuB    |
| Rv0963c | pp | Rv2716  |
| ackA    | pp | echA19  |
| fadD26  | pp | Rv3814c |
| hspR    | pp | Rv3224  |
| Rv1331  | pp | cmaA1   |
| Rv1054  | pp | cmaA1   |
| Rv1054  | pp | dapB    |
| Rv0918  | pp | manB    |
| Rv0042c | pp | Rv2067c |
| Rv0263c | pp | pknG    |
| pyrC    | pp | Rv3583c |
| pyrC    | pp | gpgP    |
| Rv0313  | pp | Rv1245c |
| Rv1508A | pp | dapB    |
| Rv0692  | pp | nusB    |
| Rv0692  | pp | gltS    |
| Rv3226c | pp | Rv3699  |
| Rv3226c | pp | purE    |
| Rv2843  | pp | rpsB    |
| Rv0378  | pp | Rv2475c |
| rpmE    | pp | Rv3669  |
| PE22    | pp | fadA6   |
| Rv0150c | pp | rpiB    |

|           |    |         |
|-----------|----|---------|
| PPE45     | pp | sseA    |
| Rv0082    | pp | Rv0493c |
| PE26      | pp | Rv2765  |
| Rv2690c   | pp | Rv3600c |
| Rv0476    | pp | hisB    |
| Rv1341    | pp | galE1   |
| vapC20    | pp | icd1    |
| nrp       | pp | Rv3600c |
| Rv1075c   | pp | trxC    |
| Rv1117    | pp | Rv2054  |
| Rv1117    | pp | aroG    |
| Rv1117    | pp | lldD2   |
| PE_PGRS8  | pp | Rv2230c |
| pks9      | pp | hupB    |
| Rv2426c   | pp | Rv3519  |
| pks12     | pp | rpsK    |
| dnaB      | pp | ppa     |
| dnaB      | pp | dapB    |
| vapC36    | pp | fas     |
| Rv1209    | pp | dapB    |
| mutT2     | pp | aroF    |
| Rv2375    | pp | Rv3094c |
| idi       | pp | Rv2581c |
| greC1     | pp | Rv2475c |
| Rv2822c   | pp | hupB    |
| ureB      | pp | kdtB    |
| ureB      | pp | ahpD    |
| ureB      | pp | orn     |
| Rv0028    | pp | espL    |
| Rv0028    | pp | Rv0333  |
| tesB1     | pp | dapB    |
| tesB1     | pp | rpsK    |
| Rv2132    | pp | gpgP    |
| Rv1951c   | pp | aroG    |
| Rv1951c   | pp | accD5   |
| Rv1995    | pp | fadE23  |
| Rv1995    | pp | fadA6   |
| Rv3353c   | pp | cmaA1   |
| Rv1930c   | pp | dapB    |
| Rv1930c   | pp | leuA    |
| Rv1930c   | pp | Rv3600c |
| Rv1373    | pp | Rv3669  |
| Rv0950c   | pp | Rv2074  |
| Rv3228    | pp | Rv3814c |
| Rv1465    | pp | lysS    |
| Rv1465    | pp | Rv2409c |
| Rv1225c   | pp | dapB    |
| Rv1225c   | pp | ceoB    |
| trpD      | pp | dapB    |
| argR      | pp | sigH    |
| lpqX      | pp | cmaA1   |
| glbN      | pp | dprE2   |
| Rv0036c   | pp | pyrR    |
| Rv1583c   | pp | ald     |
| Rv1583c   | pp | pheS    |
| mmpS4     | pp | echA5   |
| Rv2418c   | pp | dapB    |
| Rv3122    | pp | Rv3542c |
| Rv3489    | pp | Rv3583c |
| Rv0324    | pp | rpID    |
| Rv1021    | pp | htdY    |
| Rv1021    | pp | accE5   |
| Rv0666    | pp | topA    |
| Rv0741    | pp | dprE1   |
| lpdA      | pp | hsaG    |
| mce2C     | pp | Rv1919c |
| Rv2683    | pp | dapB    |
| Rv1220c   | pp | mapB    |
| aac       | pp | Rv2716  |
| Rv2078    | pp | bkdC    |
| fadD11.1  | pp | guaB3   |
| Rv1287    | pp | nat     |
| Rv2119    | pp | Rv2475c |
| PE_PGRS12 | pp | Rv3814c |
| PE_PGRS12 | pp | fabG3   |
| PE_PGRS12 | pp | pyrB    |
| Rv0463    | pp | rpIK    |
| Rv0463    | pp | ribF    |
| cyp135B1  | pp | Rv2765  |
| kdpD      | pp | Rv3716c |
| cyp124    | pp | folD    |

|         |    |         |
|---------|----|---------|
| Rv1742  | pp | gevT    |
| rplR    | pp | fadE35  |
| wbbL2   | pp | ahpC    |
| Rv0914c | pp | dapB    |
| Rv0914c | pp | Rv2074  |
| Rv0914c | pp | Rv1703c |
| Rv2295  | pp | gltS    |
| Rv1576c | pp | Rv3050c |
| kasB    | pp | fas     |
| kasB    | pp | echA19  |
| kdpC    | pp | ahpD    |
| espD    | pp | espR    |
| Rv0851c | pp | Rv2054  |
| Rv0851c | pp | pyrR    |
| Rv0851c | pp | gltD    |
| Rv0851c | pp | fadE19  |
| Rv0492c | pp | udgB    |
| Rv2614A | pp | glmS    |
| lpqT    | pp | espB    |
| Rv0698  | pp | ppa     |
| fmt     | pp | ahpD    |
| cdh     | pp | serA1   |
| lpqN    | pp | topA    |
| lpqN    | pp | Rv2765  |
| Rv2468c | pp | dapB    |
| pknA    | pp | aroA    |
| pknA    | pp | kasA    |
| Rv0634c | pp | fadE25  |
| aspC    | pp | rpoA    |
| vapB40  | pp | accD5   |
| Rv3778c | pp | Rv3814c |
| Rv2372c | pp | mhuD    |
| rpmI    | pp | topA    |
| Rv2367c | pp | Rv2901c |
| Rv2366c | pp | ahpC    |
| vapC6   | pp | topA    |
| mmpS5   | pp | fadA6   |
| Rv2186c | pp | topA    |
| Rv0689c | pp | viuB    |
| Rv0689c | pp | mrr     |
| Rv0474  | pp | Rv0925c |
| Rv0474  | pp | pheS    |
| pnp     | pp | Rv2716  |
| Rv1119c | pp | Rv2474c |
| ptrBa   | pp | Rv0785  |
| ptrBa   | pp | dlaT    |
| Rv0318c | pp | Rv2409c |
| murD    | pp | acyP    |
| cysH    | pp | espR    |
| moaB2   | pp | sigH    |
| echA11  | pp | espB    |
| Rv2473  | pp | folD    |
| Rv2473  | pp | echA19  |
| Rv0744c | pp | Rv1178  |
| Rv0744c | pp | Rv0831c |
| Rv0744c | pp | glf     |
| Rv0744c | pp | dlaT    |
| Rv0744c | pp | aspS    |
| Rv0836c | pp | echA19  |
| Rv0836c | pp | topA    |
| adhA    | pp | gabT    |
| Rv2293c | pp | dapB    |
| sigG    | pp | hemC    |
| Rv0481c | pp | dapC    |
| Rv0481c | pp | amiA1   |
| tam     | pp | Rv0953c |
| tam     | pp | murB    |
| tam     | pp | cysS1   |
| Rv1439c | pp | vapC17  |
| Rv1439c | pp | Rv3169  |
| Rv0837c | pp | sigH    |
| Rv0837c | pp | dapB    |
| Rv2622  | pp | dapB    |
| Rv1473A | pp | Rv2298  |
| PPE27   | pp | orn     |
| Rv2712c | pp | echA19  |
| Rv0057  | pp | dapB    |
| Rv1158c | pp | dapB    |
| vapC29  | pp | accA1   |
| vapC29  | pp | corA    |
| vapC29  | pp | pknD    |

|         |    |         |
|---------|----|---------|
| PE17    | pp | bfrA    |
| Rv0942  | pp | rpsT    |
| cobH    | pp | echA19  |
| cobH    | pp | Rv3678c |
| Rv1273c | pp | Rv3131  |
| nei     | pp | Rv3329  |
| Rv0024  | pp | espB    |
| Rv0024  | pp | fadA3   |
| Rv0024  | pp | rpsS    |
| Rv3463  | pp | lsr2    |
| Rv0907  | pp | snzP    |
| Rv0634A | pp | mapB    |
| Rv0224c | pp | Rv3272  |
| Rv0224c | pp | glf     |
| Rv2417c | pp | hupB    |
| trpA    | pp | Rv2474c |
| trpA    | pp | Rv2230c |
| trpA    | pp | Rv2182c |
| trpA    | pp | serA1   |
| Rv1312  | pp | dapB    |
| Rv0295c | pp | Rv1144  |
| proA    | pp | rplM    |
| proA    | pp | hsaG    |
| Rv0880  | pp | echA7   |
| Rv0880  | pp | TB15.3  |
| Rv0880  | pp | prfB    |
| glpQ2   | pp | cmaA2   |
| glpQ2   | pp | glf     |
| glpQ2   | pp | Rv3600c |
| Rv0071  | pp | rplN    |
| Rv0071  | pp | nusB    |
| PE8     | pp | dapB    |
| PE8     | pp | thrC    |
| vapB20  | pp | ppa     |
| PE18    | pp | espR    |
| PE18    | pp | Rv3600c |
| Rv1086  | pp | Rv2406c |
| ndkA    | pp | fixA    |
| PE19    | pp | tesA    |
| PE19    | pp | Rv3716c |
| Rv2598  | pp | purE    |
| Rv2598  | pp | dapB    |
| dcd     | pp | gpgP    |
| dcd     | pp | Rv0831c |
| dcd     | pp | dapB    |
| higA    | pp | sigH    |
| ndh     | pp | Rv2239c |
| Rv1137c | pp | dapB    |
| vapB19  | pp | sodA    |
| recO    | pp | tesA    |
| recO    | pp | rpiB    |
| Rv1337  | pp | dapB    |
| Rv0789c | pp | cmaA1   |
| Rv0789c | pp | bcp     |
| Rv0789c | pp | rpsO    |
| Rv0068  | pp | gabT    |
| Rv0068  | pp | Rv2409c |
| Rv1505c | pp | tgs4    |
| Rv0759c | pp | folD    |
| Rv1354c | pp | dnaJ2   |
| Rv1354c | pp | Rv3819  |
| Rv1354c | pp | Rv3716c |
| Rv0979c | pp | hisG    |
| Rv0979c | pp | dapB    |
| rskA    | pp | sigK    |
| Rv2635  | pp | Rv3600c |
| Rv2635  | pp | hsaA    |
| Rv3000  | pp | sodA    |
| Rv0610c | pp | accE5   |
| Rv0687  | pp | rpoA    |
| Rv1120c | pp | Rv2182c |
| Rv0822c | pp | echA6   |
| Rv1105  | pp | Rv1265  |
| Rv1105  | pp | glgP    |
| Rv0025  | pp | gpgP    |
| Rv0025  | pp | hisB    |
| Rv2688c | pp | Rv3519  |
| Rv0519c | pp | udgB    |
| Rv0519c | pp | aroB    |
| Rv0519c | pp | dapB    |
| Rv0519c | pp | cspA    |

|           |    |         |
|-----------|----|---------|
| Rv1428c   | pp | tal     |
| dnaA      | pp | bfrA    |
| dnaA      | pp | Rv2522c |
| vapC13    | pp | Rv3669  |
| vapC13    | pp | rpsB    |
| Rv0680c   | pp | hisB    |
| Rv0680c   | pp | ceoB    |
| whiB2     | pp | folD    |
| celA2b    | pp | gltS    |
| Rv0790c   | pp | prcA    |
| rplW      | pp | nadC    |
| rplW      | pp | TB18.6  |
| eccA3     | pp | Rv0925c |
| eccA3     | pp | TB27.3  |
| Rv2816c   | pp | folD    |
| Rv3192    | pp | ppa     |
| yrbE2A    | pp | prcA    |
| mce2R     | pp | fas     |
| mce2R     | pp | Rv3600c |
| PE24      | pp | Rv3272  |
| tsnR      | pp | dapB    |
| tsnR      | pp | Rv3600c |
| echA20    | pp | Rv3600c |
| gca       | pp | nuoE    |
| galE3     | pp | echA6   |
| galE3     | pp | Rv1245c |
| galE3     | pp | Rv3600c |
| Rv1474c   | pp | pdxH    |
| cysM      | pp | Rv2765  |
| cysM      | pp | fabG1   |
| PE_PGRS37 | pp | Rv2716  |
| PE_PGRS37 | pp | kasA    |
| cut3      | pp | Rv3548c |
| hycE      | pp | accE5   |
| hycE      | pp | Rv0315  |
| hycE      | pp | prcA    |
| hycE      | pp | hupB    |
| che1      | pp | echA19  |
| che1      | pp | dapB    |
| vapC33    | pp | cmaA1   |
| Rv1885c   | pp | rpsB    |
| uvrD1     | pp | Rv1532c |
| uvrD1     | pp | Rv3583c |
| Rv1480    | pp | ahpD    |
| moaC2     | pp | aroG    |
| vapB21    | pp | rpsO    |
| vapB21    | pp | dapB    |
| hsdS.1    | pp | ilvN    |
| subI      | pp | cadI    |
| fdxA      | pp | TB18.6  |
| fdxA      | pp | ceoB    |
| Rv0461    | pp | dapB    |
| fucA      | pp | pyrR    |
| Rv2022c   | pp | fixA    |
| Rv2022c   | pp | Rv3368c |
| Rv3395c   | pp | topA    |
| galTb     | pp | rpsT    |
| galTb     | pp | amiA1   |
| galTb     | pp | pheA    |
| cyp123    | pp | Rv3726  |
| Rv0616c   | pp | Rv1422  |
| Rv0616c   | pp | dapB    |
| Rv0209    | pp | infC    |
| gcvH      | pp | cysS1   |
| gcvH      | pp | fadE35  |
| Rv3386    | pp | galE1   |
| Rv0257    | pp | hisB    |
| Rv0257    | pp | dapB    |
| hsp       | pp | thiD    |
| hsp       | pp | rplA    |
| hsp       | pp | mmaA4   |
| hsp       | pp | murA    |
| Rv2585c   | pp | fadD13  |
| Rv0077c   | pp | Rv0580c |
| Rv1100    | pp | galE1   |
| rseA      | pp | scoA    |
| rseA      | pp | ilvB1   |
| Rv0799c   | pp | relE    |
| Rv0799c   | pp | dapB    |
| Rv1413    | pp | infC    |
| Rv1413    | pp | folD    |

|         |    |         |
|---------|----|---------|
| Rv0940c | pp | rpoA    |
| ephG    | pp | Rv3600c |
| ephG    | pp | adhD    |
| Rv0323c | pp | hspX    |
| Rv0323c | pp | TB18.6  |
| Rv0323c | pp | kdtB    |
| Rv0323c | pp | gpgP    |
| tlyA    | pp | Rv3699  |
| Rv0074  | pp | Rv0221  |
| rpmC    | pp | Rv0953c |
| rpmC    | pp | rpsB    |
| rpmC    | pp | Rv3131  |
| trcS    | pp | Rv3814c |
| Rv2437  | pp | topA    |
| mazF4   | pp | accE5   |
| mazF4   | pp | glmS    |
| mazF4   | pp | topA    |
| fgd2    | pp | scoB    |
| Rv0787A | pp | gpgP    |
| Rv2472  | pp | dapB    |
| Rv3517  | pp | topA    |
| Rv2432c | pp | dapB    |
| Rv1498c | pp | hupB    |
| Rv2307B | pp | fadE25  |
| Rv1748  | pp | dapB    |
| Rv1735c | pp | folD    |
| Rv0606  | pp | Rv3600c |
| Rv0606  | pp | fadD9   |
| Rv2541  | pp | dapB    |
| Rv0695  | pp | bkdC    |
| Rv0695  | pp | Rv2067c |
| fadE18  | pp | ppa     |
| Rv0763c | pp | Rv1443c |
| Rv2387  | pp | viuB    |
| Rv2387  | pp | Rv2624c |
| lppH    | pp | Rv3600c |
| argA    | pp | Rv3099c |
| mbtI    | pp | Rv2409c |
| folP2   | pp | Rv2624c |
| Rv2081c | pp | Rv3600c |
| Rv2081c | pp | fadD13  |
| obg     | pp | fas     |
| esxL    | pp | folD    |
| Rv3073c | pp | accD5   |
| Rv1342c | pp | pdxH    |
| Rv2407  | pp | Rv2569c |
| Rv2910c | pp | tgs2    |
| sigE    | pp | hisB    |
| Rv0731c | pp | sseA    |
| Rv0731c | pp | Rv0925c |
| Rv1060  | pp | glpD2   |
| Rv2665  | pp | ilvB1   |
| Rv2599  | pp | dapB    |
| Rv0912  | pp | bfrA    |
| Rv0912  | pp | nuoE    |
| Rv0912  | pp | rpiB    |
| Rv0912  | pp | Rv3075c |
| Rv0912  | pp | Rv3131  |
| pepQ    | pp | echA21  |
| pks10   | pp | echA19  |
| mmpL1   | pp | rplJ    |
| mmpL1   | pp | Rv3131  |
| Rv0192  | pp | echA21  |
| Rv0986  | pp | rplU    |
| Rv3481c | pp | echA19  |
| Rv0921  | pp | Rv3519  |
| eccD5   | pp | snzP    |
| Rv0396  | pp | Rv1265  |
| Rv0329c | pp | mmaA2   |
| Rv0516c | pp | fadD13  |
| Rv0516c | pp | mmaA2   |
| Rv0516c | pp | rpmG2   |
| Rv1680  | pp | rpsB    |
| mazF6   | pp | topA    |
| Rv0374c | pp | rpmG2   |
| dppB    | pp | Rv3678c |
| mbtE    | pp | sseA    |
| Rv2269c | pp | Rv2581c |
| Rv2269c | pp | fadE25  |
| Rv2554c | pp | mapB    |
| hadA    | pp | tgs4    |



|           |    |         |
|-----------|----|---------|
| hadA      | pp | Rv3269  |
| hadA      | pp | rphA    |
| rpsN2     | pp | kdtB    |
| rpsN2     | pp | Rv3094c |
| Rv2018    | pp | accE5   |
| Rv2018    | pp | sthA    |
| PPE9      | pp | thrS    |
| Rv1056    | pp | dapA    |
| Rv1056    | pp | Rv3520c |
| Rv2324    | pp | Rv2581c |
| PE_PGRS32 | pp | fadD31  |
| PE_PGRS32 | pp | dapB    |
| esxK      | pp | dapB    |
| Rv2864c   | pp | hupB    |
| mmaA1     | pp | mutA    |
| ccdA      | pp | rpsH    |
| cobB      | pp | folD    |
| bioD      | pp | topA    |
| Rv0650    | pp | echA19  |
| Rv1087A   | pp | mutA    |
| Rv1087A   | pp | Rv3600c |
| cyp135A1  | pp | dapB    |
| Rv2469c   | pp | Rv2475c |
| Rv2469c   | pp | mhuD    |
| iniC      | pp | hupB    |
| iniC      | pp | Rv3716c |
| iniC      | pp | gpm1    |
| Rv3813c   | pp | trxC    |
| Rv3007c   | pp | Rv3131  |
| pcp       | pp | Rv3583c |
| Rv0138    | pp | aroF    |
| Rv0138    | pp | Rv3520c |
| gpdA1     | pp | dlaT    |
| PPE36     | pp | dapB    |
| mprA      | pp | echA19  |
| Rv1072    | pp | hisB    |
| Rv2028c   | pp | prcA    |
| oppC      | pp | Rv2474c |
| oppC      | pp | Rv2454c |
| Rv2478c   | pp | Rv3669  |
| Rv2478c   | pp | ilvB1   |
| cobL      | pp | gltD    |
| Rv3844    | pp | espR    |
| Rv0007    | pp | echA19  |
| PE27      | pp | Rv3669  |
| PE5       | pp | Rv3600c |
| PE5       | pp | Rv1533  |
| PE5       | pp | fabG2   |
| Rv0049    | pp | mutA    |
| Rv0049    | pp | kasA    |
| Rv0049    | pp | Rv3520c |
| Rv2880c   | pp | Rv3131  |
| Rv2880c   | pp | Rv3600c |
| Rv2880c   | pp | hupB    |
| vapB13    | pp | pheA    |
| serB1     | pp | echA7   |
| Rv1510    | pp | leuA    |
| Rv1510    | pp | Rv3600c |
| Rv0039c   | pp | bfrA    |
| Rv0998    | pp | nuoF    |
| mshA      | pp | Rv1928c |
| mshA      | pp | Rv1532c |
| PPE38     | pp | tig     |
| PPE38     | pp | Rv2475c |
| PPE38     | pp | ceoB    |
| Rv1823    | pp | fixA    |
| otsB1     | pp | accE5   |
| otsB1     | pp | Rv3716c |
| vapC2     | pp | rplC    |
| vapC2     | pp | acg     |
| dedA      | pp | dapB    |
| dedA      | pp | amiA1   |
| Rv1496    | pp | accE5   |
| Rv2203    | pp | pfkA    |
| Rv2203    | pp | Rv3850  |
| alkA      | pp | Rv3050c |
| Rv0547c   | pp | 35kd_ag |
| Rv0547c   | pp | rpsO    |
| Rv1924c   | pp | dapB    |
| Rv1504c   | pp | TB18.6  |
| Rv1833c   | pp | dapB    |

|         |    |         |
|---------|----|---------|
| Rv2806  | pp | folD    |
| Rv2806  | pp | Rv3224  |
| lppI    | pp | Rv2409c |
| lppI    | pp | dapB    |
| lppI    | pp | dprE2   |
| Rv1888c | pp | pdxH    |
| Rv1888c | pp | Rv3583c |
| moxR1   | pp | Rv2005c |
| moxR1   | pp | Rv1770  |
| moxR1   | pp | leuA    |
| Rv2617c | pp | dapB    |
| Rv2617c | pp | Rv3600c |
| vapB6   | pp | Rv2474c |
| lppO    | pp | dapB    |
| lppO    | pp | metC    |
| lppO    | pp | Rv2953  |
| Rv1444c | pp | topA    |
| Rv1444c | pp | glf     |
| Rv1444c | pp | pykA    |
| Rv0229c | pp | topA    |
| Rv2696c | pp | Rv3548c |
| Rv3230c | pp | fadA6   |
| Rv1132  | pp | Rv2159c |
| Rv0213c | pp | dapB    |
| Rv1773c | pp | sigH    |
| Rv1773c | pp | hsaA    |
| Rv1190  | pp | rpsT    |
| Rv1190  | pp | ppa     |
| rpfC    | pp | Rv3678c |
| rpfC    | pp | ceoC    |
| Rv1135A | pp | amiA1   |
| Rv1135A | pp | Rv1265  |
| Rv1003  | pp | tpx     |
| Rv1003  | pp | rpsO    |
| Rv1003  | pp | nusB    |
| Rv1003  | pp | cmaA1   |
| Rv1003  | pp | Rv2159c |
| Rv1003  | pp | Rv1544  |
| Rv1003  | pp | Rv1422  |
| mutY    | pp | gltD    |
| Rv1891  | pp | Rv1898  |
| msrB    | pp | rpsO    |
| msrB    | pp | dapB    |
| msrB    | pp | Rv3814c |
| ufaA1   | pp | nuoE    |
| ufaA1   | pp | hisB    |
| ufaA1   | pp | Rv1144  |
| thiG    | pp | inhA    |
| Rv1012  | pp | Rv2991  |
| Rv1012  | pp | Rv2405  |
| Rv0609A | pp | Rv2716  |
| Rv0609A | pp | echA5   |
| vapC24  | pp | fadD13  |
| vapC24  | pp | Rv1627c |
| Rv2310  | pp | ilvB1   |
| Rv2310  | pp | folD    |
| espC    | pp | espR    |
| Rv1503c | pp | echA15  |
| deoC    | pp | cfp29   |
| deoC    | pp | aroF    |
| dfrA    | pp | Rv3368c |
| pepD    | pp | purE    |
| prfB    | pp | rpsO    |
| Rv3174  | pp | echA19  |
| vapB12  | pp | Rv2624c |
| vapB12  | pp | aroG    |
| Rv0607  | pp | Rv0925c |
| Rv0607  | pp | dapB    |
| Rv2219A | pp | leuA    |
| Rv2219A | pp | prfB    |
| xthA    | pp | hupB    |
| xthA    | pp | tgs4    |
| xthA    | pp | Rv1532c |
| Rv1577c | pp | Rv1770  |
| Rv1577c | pp | folD    |
| Rv1577c | pp | dapB    |
| Rv1577c | pp | hsaD    |
| mce3R   | pp | accA3   |
| dgt     | pp | ppsE    |
| sigL    | pp | Rv3600c |
| Rv2825c | pp | rpsK    |

|         |    |         |
|---------|----|---------|
| whiB3   | pp | Rv3548c |
| whiB3   | pp | Rv3600c |
| whiB3   | pp | rpoA    |
| cysW    | pp | rpiB    |
| Rv3243c | pp | Rv3726  |
| Rv2033c | pp | Rv2969c |
| Rv2033c | pp | fadD13  |
| Rv1638A | pp | Rv2716  |
| Rv1638A | pp | Rv3094c |
| Rv1638A | pp | Rv2083  |
| Rv1638A | pp | folD    |
| Rv1638A | pp | rpsB    |
| Rv1638A | pp | gcvT    |
| Rv0920c | pp | pdxH    |
| Rv3120  | pp | Rv3814c |
| Rv0825c | pp | tgs4    |
| Rv0825c | pp | nuoF    |
| Rv0825c | pp | topA    |
| Rv0825c | pp | Rv1928c |
| Rv0825c | pp | Rv2969c |
| Rv1546  | pp | mapB    |
| Rv0047c | pp | mmaA2   |
| Rv0047c | pp | Rv2474c |
| Rv0047c | pp | Rv0791c |
| Rv1571  | pp | fixA    |
| Rv1571  | pp | thrS    |
| Rv1571  | pp | Rv2230c |
| Rv2787  | pp | Rv3224  |
| Rv2699c | pp | tgs4    |
| Rv1939  | pp | Rv3600c |
| Rv1939  | pp | Rv3094c |
| Rv1939  | pp | vapC17  |
| Rv2250c | pp | espB    |
| hrp1    | pp | topA    |
| Rv2047c | pp | viuB    |
| Rv2560  | pp | gabT    |
| Rv0484c | pp | bkdC    |
| Rv0484c | pp | Rv2676c |
| Rv2250A | pp | Rv3169  |
| Rv2250A | pp | lsr2    |
| Rv2256c | pp | Rv2405  |
| Rv1455  | pp | ppa     |
| Rv1455  | pp | infC    |
| Rv1574  | pp | dapB    |
| Rv1574  | pp | Rv3600c |
| argC    | pp | ilvE    |
| cyp143  | pp | purE    |
| devB    | pp | Rv3699  |
| devB    | pp | nadC    |
| devB    | pp | Rv2569c |
| Rv0048c | pp | echA6   |
| Rv0161  | pp | rpsT    |
| Rv0997  | pp | nadC    |
| Rv2636  | pp | Rv3777  |
| Rv2636  | pp | pheA    |
| Rv2636  | pp | amiA1   |
| vapB14  | pp | mapB    |
| vapB14  | pp | Rv3600c |
| Rv0406c | pp | dapB    |
| Rv0802c | pp | Rv2474c |
| Rv0802c | pp | tpx     |
| Rv2091c | pp | Rv3600c |
| Rv2253  | pp | rpsI    |
| Rv2253  | pp | dapB    |
| Rv2821c | pp | sseA    |
| Rv2821c | pp | Rv3600c |
| Rv1767  | pp | accE5   |
| cysQ    | pp | hsaD    |
| Rv3475  | pp | topA    |
| Rv1830  | pp | fadE23  |
| Rv1830  | pp | folD    |
| Rv2669  | pp | Rv3777  |
| Rv2669  | pp | hsaD    |
| Rv2669  | pp | gatA    |
| Rv2680  | pp | Rv3131  |
| lipB    | pp | Rv2474c |
| lipB    | pp | accD5   |
| Rv3126c | pp | topA    |
| xylB    | pp | Rv2409c |
| xylB    | pp | gpgP    |
| Rv0600c | pp | hupB    |

|         |    |         |
|---------|----|---------|
| Rv0600c | pp | mmsA    |
| Rv1518  | pp | Rv3678c |
| vapC18  | pp | dapB    |
| Rv1804c | pp | rplS    |
| Rv0259c | pp | fadE25  |
| Rv0259c | pp | fadD31  |
| vapC21  | pp | dapB    |
| fabH    | pp | pknD    |
| fabH    | pp | ahpD    |
| fabH    | pp | cmaA1   |
| Rv2805  | pp | tsf     |
| Rv2805  | pp | fadE25  |
| rubA    | pp | folE    |
| nuoC    | pp | Rv3329  |
| nuoC    | pp | sigH    |
| treX    | pp | kdtB    |
| Rv3134c | pp | glpD2   |
| Rv0345  | pp | ceoC    |
| Rv1184c | pp | Rv3583c |
| Rv1184c | pp | folD    |
| pstP    | pp | pdxH    |
| mazE4   | pp | glyS    |
| mazE4   | pp | aspS    |
| mazE4   | pp | topA    |
| mazF2   | pp | accE5   |
| Rv1104  | pp | dut     |
| Rv1104  | pp | amiA1   |
| Rv2038c | pp | ahpD    |
| Rv0308  | pp | hisB    |
| mmsB    | pp | rpsO    |
| menA    | pp | ahpD    |
| Rv1863c | pp | pheA    |
| Rv0142  | pp | trxC    |
| Rv0145  | pp | Rv1155  |
| rpfA    | pp | sseA    |
| rpfA    | pp | nuoE    |
| rpfA    | pp | gpgP    |
| Rv0966c | pp | cmaA1   |
| Rv0614  | pp | Rv0831c |
| Rv0614  | pp | rpoA    |
| Rv0614  | pp | rpsD    |
| Rv0614  | pp | htdY    |
| Rv0219  | pp | inhA    |
| Rv0219  | pp | rplM    |
| Rv0219  | pp | glf     |
| PE10    | pp | Rv3777  |
| PE10    | pp | trxC    |
| PE10    | pp | atpD    |
| PE10    | pp | metK    |
| plcD    | pp | echA21  |
| plcD    | pp | dapB    |
| relB    | pp | mtrA    |
| relB    | pp | Rv3075c |
| Rv0027  | pp | glf     |
| Rv0027  | pp | dapB    |
| Rv0027  | pp | aroF    |
| Rv0027  | pp | udgB    |
| Rv0027  | pp | fadD24  |
| Rv0027  | pp | rpsS    |
| Rv0027  | pp | Rv0439c |
| Rv0027  | pp | Rv1627c |
| gmk     | pp | nadC    |
| Rv0187  | pp | rplD    |
| Rv0187  | pp | gltD    |
| Rv0187  | pp | Rv0801  |
| rpe     | pp | ceoB    |
| lprO    | pp | atpG    |
| pbpB    | pp | glpD2   |
| rpsN1   | pp | Rv1544  |
| Rv3233c | pp | Rv3600c |
| Rv3233c | pp | cmaA1   |
| Rv2687c | pp | sodA    |
| PE4     | pp | Rv0927c |
| ruvA    | pp | purE    |
| Rv1975  | pp | ctpC    |
| Rv1975  | pp | fadE22  |
| Rv1975  | pp | trpS    |
| Rv1975  | pp | fas     |
| Rv1975  | pp | efp     |
| Rv1975  | pp | Rv3272  |
| Rv3047c | pp | ppa     |

|         |    |         |
|---------|----|---------|
| mazE7   | pp | hns     |
| Rv1019  | pp | folD    |
| Rv1019  | pp | Rv1025  |
| Rv2323c | pp | dut     |
| narK2   | pp | Rv3131  |
| narK2   | pp | Rv2410c |
| Rv0307c | pp | rpsA    |
| Rv0307c | pp | trpC    |
| Rv0307c | pp | serC    |
| Rv0307c | pp | murA    |
| PPE22   | pp | ahpC    |
| PPE22   | pp | gabT    |
| PPE22   | pp | Rv2005c |
| PPE22   | pp | pafA    |
| PPE22   | pp | gltD    |
| PPE22   | pp | topA    |
| PPE22   | pp | Rv3169  |
| Rv1036c | pp | Rv1869c |
| Rv1414  | pp | fas     |
| Rv1414  | pp | hisB    |
| hadC    | pp | hisB    |
| Rv2464c | pp | echA21  |
| Rv2464c | pp | espB    |
| pstS3   | pp | serA1   |
| Rv1257c | pp | Rv3819  |
| lipG    | pp | mmsA    |
| lipG    | pp | icd1    |
| wbbL1   | pp | Rv3329  |
| wbbL1   | pp | glf     |
| Rv0122  | pp | dapB    |
| Rv0122  | pp | Rv3600c |
| Rv0067c | pp | fadE2   |
| vapB43  | pp | amiA1   |
| Rv1867  | pp | rpsB    |
| Rv1867  | pp | mapB    |
| Rv1867  | pp | dapB    |
| Rv0909  | pp | hsaA    |
| ogt     | pp | glpD2   |
| ogt     | pp | dapB    |
| ogt     | pp | amiA1   |
| ogt     | pp | fabG2   |
| ogt     | pp | glyS    |
| ogt     | pp | prcA    |
| Rv2717c | pp | fixA    |
| Rv2717c | pp | accE5   |
| Rv2717c | pp | Rv3224  |
| tesB2   | pp | dapB    |
| Rv0893c | pp | dapB    |
| Rv1044  | pp | Rv2409c |
| Rv1044  | pp | Rv2581c |
| Rv1716  | pp | Rv3368c |
| Rv1050  | pp | Rv3600c |
| fabD    | pp | mapB    |
| fabD    | pp | purE    |
| Rv3034c | pp | ispF    |
| bpoC    | pp | Rv3600c |
| bpoC    | pp | dapB    |
| bpoC    | pp | nadC    |
| clpP1   | pp | Rv3720  |
| esxV    | pp | Rv3850  |
| esxV    | pp | espR    |
| esxV    | pp | topA    |
| Rv0302  | pp | trpC    |
| PE6     | pp | TB18.6  |
| PE6     | pp | scoA    |
| Rv1668c | pp | sigH    |
| Rv1668c | pp | purE    |
| Rv0031  | pp | topA    |
| Rv0031  | pp | dapB    |
| Rv0031  | pp | Rv2067c |
| Rv0031  | pp | Rv1544  |
| whiB7   | pp | Rv3814c |
| whiB7   | pp | ispF    |
| whiB7   | pp | rpsK    |
| whiB7   | pp | leuA    |
| pup     | pp | Rv3200c |
| Rv2695  | pp | Rv3329  |
| Rv2695  | pp | dapB    |
| echA14  | pp | cmaA1   |
| Rv3209  | pp | cmaA1   |
| mpg     | pp | topA    |

|         |    |           |
|---------|----|-----------|
| accD5   | pp | mesJ      |
| rpsT    | pp | mrr       |
| rpsT    | pp | accE5     |
| rpsT    | pp | Rv2825c   |
| rpsT    | pp | Rv3412    |
| prrA    | pp | Rv3412    |
| vapB27  | pp | Rv1752    |
| TB16.3  | pp | TB22.2    |
| Rv1178  | pp | Rv2825c   |
| Rv1178  | pp | Rv3438    |
| Rv1178  | pp | Rv3057c   |
| Rv1178  | pp | nei       |
| murB    | pp | Rv0579    |
| murB    | pp | Rv0776c   |
| murB    | pp | Rv3134c   |
| murB    | pp | Rv3475    |
| echA5   | pp | Rv3693    |
| echA5   | pp | Rv3468c   |
| echA5   | pp | pyrF      |
| echA5   | pp | Rv0997    |
| echA5   | pp | rpfE      |
| echA5   | pp | vapB37    |
| Rv0801  | pp | Rv0857    |
| Rv0801  | pp | Rv1358    |
| Rv0801  | pp | Rv3552    |
| Rv0801  | pp | Rv1874    |
| Rv0801  | pp | Rv2022c   |
| Rv0801  | pp | espD      |
| Rv1532c | pp | viuB      |
| Rv1532c | pp | PPE39     |
| Rv1532c | pp | Rv2084    |
| Rv1532c | pp | Rv3131    |
| Rv3169  | pp | vapB44    |
| Rv3169  | pp | wbbL1     |
| Rv3169  | pp | Rv3566A   |
| mak     | pp | Rv3672c   |
| mak     | pp | Rv1501    |
| mak     | pp | esxV      |
| fbiC    | pp | wbbL1     |
| fbiC    | pp | Rv3422c   |
| fbiC    | pp | Rv1571    |
| trpS    | pp | Rv3672c   |
| trpS    | pp | Rv3475    |
| trpS    | pp | PE_PGRS60 |
| fum     | pp | Rv3716c   |
| fum     | pp | Rv3789    |
| fum     | pp | Rv1287    |
| fum     | pp | ndkA      |
| Rv1898  | pp | PE_PGRS61 |
| Rv1898  | pp | Rv1937    |
| dapF    | pp | esxB      |
| dapF    | pp | Rv2862c   |
| Rv2716  | pp | kdtB      |
| Rv2716  | pp | rnhB      |
| Rv2716  | pp | recX      |
| Rv2716  | pp | nuoI      |
| fadE26  | pp | Rv3819    |
| Rv1732c | pp | Rv3134c   |
| Rv1732c | pp | Rv3230c   |
| Rv1732c | pp | Rv3073c   |
| sodC    | pp | sdhB      |
| sodC    | pp | dapB      |
| sodC    | pp | Rv2708c   |
| sodC    | pp | mbtB      |
| sodC    | pp | Rv2336    |
| sodC    | pp | Rv1533    |
| sodC    | pp | Rv1157c   |
| kdtB    | pp | esxC      |
| Rv3094c | pp | PPE58     |
| Rv3094c | pp | fadA6     |
| Rv3094c | pp | Rv3224    |
| rplY    | pp | Rv3579c   |
| rplY    | pp | Rv3071    |
| rplY    | pp | Rv2717c   |
| qcrA    | pp | Rv3492c   |
| viuB    | pp | amiD      |
| viuB    | pp | Rv3236c   |
| viuB    | pp | Rv2994    |
| viuB    | pp | ubiA      |
| viuB    | pp | Rv3844    |
| viuB    | pp | rplM      |

|         |    |           |
|---------|----|-----------|
| viuB    | pp | fadE28    |
| Rv2676c | pp | Rv2762c   |
| Rv2676c | pp | dfrA      |
| Rv2676c | pp | trcX      |
| echA3   | pp | Rv0986    |
| echA3   | pp | TB8.4     |
| icd1    | pp | ispF      |
| Rv2298  | pp | Rv3204    |
| Rv2298  | pp | echA19    |
| Rv2298  | pp | Rv3412    |
| cfp29   | pp | Rv2954c   |
| cfp29   | pp | espG2     |
| mihF    | pp | Rv2033c   |
| Rv1265  | pp | Rv2818c   |
| Rv1265  | pp | Rv1502    |
| Rv1265  | pp | Rv2307B   |
| Rv1265  | pp | Rv2568c   |
| Rv1265  | pp | Rv2647    |
| Rv1265  | pp | Rv1928c   |
| Rv1265  | pp | fdxA      |
| Rv1265  | pp | ctpF      |
| Rv1265  | pp | pknF      |
| Rv1265  | pp | vapC12    |
| Rv1265  | pp | rpe       |
| Rv1265  | pp | lpqA      |
| Rv1265  | pp | papA5     |
| Rv1265  | pp | viuB      |
| Rv1265  | pp | mapB      |
| Rv1265  | pp | acg       |
| Rv0293c | pp | tam       |
| Rv0293c | pp | Rv2310    |
| Rv0293c | pp | Rv3359    |
| Rv0293c | pp | Rv0756c   |
| Rv1869c | pp | Rv2269c   |
| Rv1261c | pp | Rv1752    |
| prfB    | pp | Rv3517    |
| prfB    | pp | Rv3122    |
| Rv1404  | pp | devB      |
| hisA    | pp | Rv3327    |
| Rv3726  | pp | Rv3786c   |
| Rv3726  | pp | Rv3766    |
| pykA    | pp | Rv2250c   |
| pykA    | pp | Rv3600c   |
| rpsO    | pp | eccE2     |
| rpsO    | pp | echA18    |
| rpsO    | pp | trmD      |
| Rv0148  | pp | PE_PGRS28 |
| Rv0148  | pp | Rv2541    |
| Rv0148  | pp | Rv2310    |
| Rv0148  | pp | Rv1957    |
| Rv0148  | pp | Rv3840    |
| rplL    | pp | lppQ      |
| rplL    | pp | fum       |
| efp     | pp | PPE67     |
| Rv0333  | pp | echA6     |
| Rv0333  | pp | vapC7     |
| citA    | pp | lppW      |
| gcvT    | pp | PE_PGRS60 |
| menB    | pp | Rv2621c   |
| accE5   | pp | Rv3472    |
| accE5   | pp | Rv3471c   |
| accE5   | pp | deoD      |
| nusG    | pp | Rv0743c   |
| cysK1   | pp | Rv3837c   |
| citE    | pp | mpt70     |
| citE    | pp | Rv2696c   |
| citE    | pp | eccCa1    |
| Rv1533  | pp | dapB      |
| Rv0831c | pp | glyA1     |
| Rv0831c | pp | PE_PGRS18 |
| Rv0831c | pp | PPE69     |
| Rv0831c | pp | TB8.4     |
| Rv0831c | pp | recX      |
| Rv0831c | pp | Rv1044    |
| Rv0831c | pp | Rv1700    |
| Rv0831c | pp | Rv2372c   |
| Rv0831c | pp | Rv3471c   |
| rplS    | pp | Rv3678c   |
| rplS    | pp | Rv3600c   |
| rplS    | pp | whiB3     |
| rplS    | pp | nuoI      |

|         |    |         |
|---------|----|---------|
| rplS    | pp | Rv3098c |
| mapB    | pp | Rv3813c |
| mapB    | pp | metA    |
| mapB    | pp | Rv3660c |
| fixA    | pp | vapB46  |
| Rv0433  | pp | whiB3   |
| Rv0433  | pp | Rv2765  |
| Rv0433  | pp | Rv2653c |
| pyrR    | pp | pyrR    |
| pyrR    | pp | Rv1670  |
| pyrR    | pp | Rv2728c |
| rplA    | pp | Rv2570  |
| gabT    | pp | Rv2622  |
| gabT    | pp | Rv3773c |
| gabT    | pp | Rv2817c |
| fadE10  | pp | Rv3327  |
| mog     | pp | Rv0968  |
| mog     | pp | Rv2035  |
| mog     | pp | Rv3472  |
| mog     | pp | dapB    |
| mog     | pp | rpiB    |
| mog     | pp | Rv3295  |
| mog     | pp | wbbL1   |
| Rv1896c | pp | esxA    |
| Rv1896c | pp | Rv3599c |
| ideR    | pp | Rv3067  |
| mkl     | pp | Rv1975  |
| mkl     | pp | obg     |
| mkl     | pp | Rv1117  |
| mkl     | pp | Rv1638A |
| mkl     | pp | Rv2474c |
| mkl     | pp | Rv1104  |
| Rv0760c | pp | Rv3131  |
| ilvN    | pp | idsA1   |
| ilvN    | pp | Rv3015c |
| lpqO    | pp | PE20    |
| eis     | pp | Rv2468c |
| eis     | pp | Rv2636  |
| eis     | pp | whiB3   |
| sucC    | pp | Rv1930c |
| sucC    | pp | prcA    |
| sucC    | pp | pks12   |
| sucC    | pp | vapB20  |
| atpG    | pp | Rv3741c |
| atpG    | pp | Rv3008  |
| atpG    | pp | Rv1444c |
| atpG    | pp | topA    |
| atpG    | pp | Rv3642c |
| adk     | pp | Rv1455  |
| rplD    | pp | vapB40  |
| rplD    | pp | Rv2825c |
| rplD    | pp | Rv1135A |
| rplD    | pp | rpfC    |
| rplD    | pp | PPE58   |
| glnB    | pp | Rv3327  |
| hbhA    | pp | vapC38  |
| hbhA    | pp | Rv1987  |
| hbhA    | pp | Rv3230c |
| hbhA    | pp | nuoI    |
| hbhA    | pp | Rv1513  |
| hbhA    | pp | echA11  |
| hbhA    | pp | PPE22   |
| hbhA    | pp | bioD    |
| hbhA    | pp | wbbL1   |
| dnaN    | pp | Rv2621c |
| dnaN    | pp | Rv3142c |
| dnaN    | pp | Rv0484c |
| ssb     | pp | Rv3474  |
| ssb     | pp | hsdS.1  |
| ssb     | pp | ung     |
| ssb     | pp | ssb     |
| dapC    | pp | Rv3752c |
| dapC    | pp | Rv1507A |
| dapC    | pp | Rv3204  |
| dapC    | pp | accD2   |
| folD    | pp | Rv3690  |
| folD    | pp | fadE28  |
| folD    | pp | Rv3434c |
| folD    | pp | idsB    |
| folD    | pp | Rv3850  |
| folD    | pp | Rv3766  |



|         |    |         |
|---------|----|---------|
| folD    | pp | Rv3694c |
| espR    | pp | Rv3850  |
| thrS    | pp | glpQ1   |
| ahpD    | pp | Rv2715  |
| ahpD    | pp | dfrA    |
| ahpD    | pp | ahpD    |
| ahpD    | pp | Rv2622  |
| ahpD    | pp | Rv2828c |
| ahpD    | pp | nagA    |
| ahpD    | pp | Rv2817c |
| ahpD    | pp | Rv2821c |
| ahpD    | pp | ppa     |
| ahpD    | pp | fadE35  |
| Rv2005c | pp | Rv2665  |
| Rv2005c | pp | Rv2616  |
| prsA    | pp | vapB41  |
| prsA    | pp | hspX    |
| hspX    | pp | ltp2    |
| hspX    | pp | lrpA    |
| hspX    | pp | whiB3   |
| hspX    | pp | Rv2267c |
| hspX    | pp | PPE38   |
| hspX    | pp | trpD    |
| hspX    | pp | Rv2250c |
| Rv1829  | pp | Rv2253  |
| Rv1829  | pp | Rv2990c |
| Rv1829  | pp | hupB    |
| Rv1829  | pp | lppF    |
| rplX    | pp | ftsZ    |
| rplX    | pp | Rv2271  |
| fadE1   | pp | rpfA    |
| desA2   | pp | Rv3718c |
| desA2   | pp | Rv2825c |
| canA    | pp | Rv1883c |
| canA    | pp | Rv1668c |
| canA    | pp | hisB    |
| canA    | pp | clpS    |
| canA    | pp | Rv3600c |
| canA    | pp | nuoC    |
| canA    | pp | PPE38   |
| infC    | pp | PE20    |
| infC    | pp | Rv2695  |
| infC    | pp | recO    |
| infC    | pp | Rv2775  |
| infC    | pp | Rv2717c |
| tsf     | pp | usfY    |
| tsf     | pp | rraA    |
| pth     | pp | mazF9   |
| thiD    | pp | vapB19  |
| thiD    | pp | Rv2409c |
| thiD    | pp | Rv1265  |
| hemC    | pp | PE29    |
| hemC    | pp | Rv3033  |
| hemC    | pp | devS    |
| hemC    | pp | Rv3137  |
| hemC    | pp | Rv1444c |
| hemC    | pp | Rv1474c |
| hemC    | pp | Rv2204c |
| mutA    | pp | whiB3   |
| pepB    | pp | Rv3466  |
| pepB    | pp | PPE69   |
| fadD8   | pp | Rv3412  |
| fadD8   | pp | pknH    |
| fadD8   | pp | PE7     |
| fadD8   | pp | Rv1891  |
| fadD8   | pp | polA    |
| mmsA    | pp | Rv0776c |
| mmsA    | pp | fadE15  |
| mmsA    | pp | Rv1137c |
| mmsA    | pp | Rv1577c |
| mmsA    | pp | trxB1   |
| mmsA    | pp | fadD14  |
| mmsA    | pp | PE7     |
| mmsA    | pp | Rv1132  |
| mmsA    | pp | Rv1105  |
| mmsA    | pp | Rv1722  |
| mmsA    | pp | lprM    |
| mmsA    | pp | Rv1975  |
| mmsA    | pp | Rv1998c |
| mmsA    | pp | hisA    |
| mmsA    | pp | Rv1638A |

|         |    |         |
|---------|----|---------|
| mmsA    | pp | ppnK    |
| mmsA    | pp | PPE22   |
| mmsA    | pp | Rv2658c |
| mmsA    | pp | Rv2700  |
| mmsA    | pp | Rv2898c |
| mmsA    | pp | Rv2915c |
| mmsA    | pp | pfkB    |
| mmsA    | pp | Rv2146c |
| mmsA    | pp | stp     |
| mmsA    | pp | esxP    |
| mmsA    | pp | Rv3241c |
| mmsA    | pp | Rv3067  |
| mmsA    | pp | fixA    |
| mmsA    | pp | PPE48   |
| mmsA    | pp | tcrY    |
| mmsA    | pp | panD    |
| mmsA    | pp | whiB3   |
| mmsA    | pp | accA3   |
| mmsA    | pp | esxB    |
| lldD2   | pp | glnD    |
| lldD2   | pp | Rv3637  |
| lldD2   | pp | Rv3091  |
| Rv0365c | pp | echA14  |
| Rv0365c | pp | Rv1501  |
| Rv0365c | pp | Rv1975  |
| fadE7   | pp | purE    |
| fadE7   | pp | Rv1003  |
| fadE7   | pp | Rv0805  |
| Rv0149  | pp | Rv2737A |
| ppa     | pp | Rv3702c |
| mbtN    | pp | Rv3672c |
| relE    | pp | mhpE    |
| relE    | pp | relF    |
| relE    | pp | relB    |
| pheS    | pp | gcvH    |
| fabG3   | pp | Rv2240c |
| fabG3   | pp | gpgP    |
| fabG3   | pp | ruvC    |
| fabG3   | pp | mpt53   |
| fabG3   | pp | Rv3599c |
| scoA    | pp | Rv3778c |
| scoA    | pp | Rv2857c |
| scoA    | pp | whiB3   |
| scoA    | pp | Rv3216  |
| galE1   | pp | Rv3766  |
| Rv0332  | pp | lppO    |
| Rv0332  | pp | Rv2003c |
| Rv0332  | pp | Rv1116A |
| Rv0332  | pp | Rv3471c |
| TB18.6  | pp | Rv2510c |
| TB18.6  | pp | vapB43  |
| TB18.6  | pp | Rv3041c |
| TB18.6  | pp | Rv3486  |
| rpsJ    | pp | esxK    |
| rpsJ    | pp | rsbW    |
| rpsJ    | pp | ogt     |
| Rv1191  | pp | Rv3780  |
| Rv1191  | pp | Rv3471c |
| Rv1191  | pp | esxV    |
| Rv0576  | pp | Rv2033c |
| Rv0576  | pp | Rv2119  |
| Rv0576  | pp | Rv2551c |
| Rv0576  | pp | Rv2766c |
| hsaA    | pp | Rv3760  |
| dut     | pp | Rv2765  |
| pgk     | pp | Rv2372c |
| pgk     | pp | Rv1941  |
| pgk     | pp | Rv2722  |
| pgk     | pp | Rv2506  |
| pgk     | pp | Rv3047c |
| pgk     | pp | Rv2961  |
| pgk     | pp | whiB3   |
| echA6   | pp | Rv1638A |
| echA6   | pp | inhA    |
| echA6   | pp | Rv2102  |
| echA6   | pp | Rv1748  |
| echA6   | pp | mprA    |
| echA6   | pp | fadA4   |
| echA6   | pp | Rv1137c |
| echA6   | pp | tesB2   |
| echA6   | pp | cysH    |

|         |    |         |
|---------|----|---------|
| echA6   | pp | Rv3352c |
| echA6   | pp | fadD22  |
| echA6   | pp | Rv3502c |
| echA6   | pp | Rv3400  |
| echA6   | pp | rfbD    |
| echA6   | pp | nth     |
| echA6   | pp | PE35    |
| Rv0081  | pp | umaA    |
| Rv0081  | pp | vapB13  |
| Rv0081  | pp | vapC18  |
| Rv0081  | pp | dapB    |
| Rv0081  | pp | Rv0477  |
| Rv0081  | pp | Rv3337  |
| Rv0081  | pp | Rv2857c |
| Rv0081  | pp | Rv0825c |
| purH    | pp | rpoZ    |
| gltS    | pp | wbbL1   |
| rplC    | pp | acpS    |
| rplC    | pp | Rv2522c |
| rplC    | pp | Rv1941  |
| rplC    | pp | whiB3   |
| rplC    | pp | Rv3604c |
| ppsE    | pp | whiB3   |
| Rv3368c | pp | Rv3538  |
| Rv3368c | pp | Rv3817  |
| hisB    | pp | Rv3768  |
| hisB    | pp | Rv3716c |
| hisB    | pp | Rv3766  |
| hisB    | pp | fadD3   |
| hisB    | pp | Rv3662c |
| hisB    | pp | accA3   |
| hisB    | pp | kshA    |
| hisB    | pp | Rv1927  |
| hisB    | pp | PPE22   |
| hisB    | pp | Rv2203  |
| hisB    | pp | Rv1961  |
| hisB    | pp | Rv2700  |
| hisB    | pp | Rv2661c |
| hisB    | pp | Rv3182  |
| hisB    | pp | Rv2819c |
| hisB    | pp | hemN    |
| hisB    | pp | Rv2292c |
| hisB    | pp | Rv2658c |
| hisB    | pp | Rv2536  |
| fgd1    | pp | hsaA    |
| fgd1    | pp | esxV    |
| fgd1    | pp | Rv0634c |
| accA1   | pp | Rv3702c |
| accA1   | pp | nuoC    |
| accA1   | pp | Rv2867c |
| rplU    | pp | Rv3113  |
| rplU    | pp | Rv3530c |
| sodA    | pp | gid     |
| rpsF    | pp | Rv1708  |
| scoB    | pp | Rv3845  |
| nat     | pp | Rv3600c |
| Rv0566c | pp | lppA    |
| Rv0566c | pp | Rv1120c |
| Rv0566c | pp | Rv1939  |
| Rv0566c | pp | Rv2475c |
| Rv0566c | pp | Rv2653c |
| Rv0566c | pp | Rv3108  |
| Rv0566c | pp | Rv3351c |
| Rv0439c | pp | Rv2256c |
| purD    | pp | Rv1257c |
| purD    | pp | espC    |
| purD    | pp | purD    |
| Rv2474c | pp | leuA    |
| htdX    | pp | esxK    |
| Rv2166c | pp | ahpD    |
| Rv2166c | pp | Rv2166c |
| sseA    | pp | Rv3861  |
| sseA    | pp | Rv3642c |
| sseA    | pp | Rv3519  |
| fadD32  | pp | ethR    |
| cadI    | pp | cadI    |
| cadI    | pp | ilvB1   |
| fadA2   | pp | Rv2844  |
| fadA2   | pp | Rv3778c |
| fadA2   | pp | vapC18  |
| fadA2   | pp | vapC28  |

|         |    |          |
|---------|----|----------|
| pfkB    | pp | Rv2765   |
| pdxH    | pp | Rv3243c  |
| metB    | pp | Rv2474c  |
| metB    | pp | Rv2669   |
| metB    | pp | folD     |
| metB    | pp | Rv3471c  |
| rplB    | pp | lpqH     |
| rplB    | pp | Rv2585c  |
| rplB    | pp | Rv3471c  |
| rplB    | pp | Rv2306A  |
| rplB    | pp | Rv2326c  |
| Rv0216  | pp | Rv2464c  |
| Rv0216  | pp | Rv2256c  |
| Rv0216  | pp | Rv1053c  |
| Rv0216  | pp | spoU     |
| Rv0216  | pp | vapB2    |
| Rv0216  | pp | rpe      |
| purE    | pp | Rv3362c  |
| purE    | pp | purE     |
| Rv2054  | pp | trmD     |
| Rv2054  | pp | proW     |
| mhuD    | pp | Rv3778c  |
| gpm1    | pp | whiB3    |
| gpm1    | pp | PE20     |
| gpm1    | pp | dapB     |
| gpm1    | pp | wbbL1    |
| secE2   | pp | Rv2857c  |
| secE2   | pp | vapB41   |
| secE2   | pp | ppiB     |
| secE2   | pp | vapB18   |
| secE2   | pp | Rv1290A  |
| Rv0141c | pp | Rv3572   |
| Rv0141c | pp | Rv3169   |
| Rv0141c | pp | Rv3387   |
| Rv0141c | pp | Rv0759c  |
| Rv0141c | pp | Rv1043c  |
| Rv0141c | pp | Rv1973   |
| Rv0141c | pp | Rv2695   |
| Rv0141c | pp | Rv0724A  |
| Rv0141c | pp | lppW     |
| Rv0141c | pp | PE_PGRS8 |
| Rv0141c | pp | deoA     |
| rpsB    | pp | Rv3304   |
| rpsB    | pp | lppH     |
| rpsB    | pp | Rv3108   |
| Rv3583c | pp | esxV     |
| Rv3583c | pp | Rv3629c  |
| Rv0925c | pp | Rv3632   |
| Rv0925c | pp | Rv1676   |
| Rv0925c | pp | vapB37   |
| Rv0925c | pp | hsdM     |
| Rv0925c | pp | esxL     |
| Rv0925c | pp | relB     |
| Rv0925c | pp | mtr      |
| snzP    | pp | aldC     |
| snzP    | pp | proS     |
| snzP    | pp | Rv2686c  |
| Rv1025  | pp | cysA1    |
| Rv1025  | pp | sirR     |
| Rv1025  | pp | narX     |
| Rv1025  | pp | glf      |
| Rv1025  | pp | PE27A    |
| Rv1025  | pp | htdY     |
| Rv1025  | pp | Rv3549c  |
| Rv1025  | pp | Rv3094c  |
| Rv1025  | pp | Rv2636   |
| Rv1025  | pp | Rv1810   |
| Rv1025  | pp | Rv1191   |
| Rv1144  | pp | lpdA     |
| Rv1144  | pp | ald      |
| Rv1144  | pp | mtr      |
| Rv1144  | pp | Rv1948c  |
| Rv1144  | pp | Rv3662c  |
| Rv1144  | pp | Rv3848   |
| Rv1144  | pp | Rv3912   |
| Rv1144  | pp | Rv1377c  |
| grpE    | pp | Rv0358   |
| grpE    | pp | accD5    |
| grpE    | pp | Rv3467   |
| grpE    | pp | dgt      |
| grpE    | pp | vapC18   |

|         |    |           |
|---------|----|-----------|
| grpE    | pp | Rv1669    |
| grpE    | pp | Rv2292c   |
| grpE    | pp | Rv0992c   |
| grpE    | pp | cyp139    |
| echA9   | pp | gevT      |
| Rv1919c | pp | Rv2076c   |
| orn     | pp | rnpA      |
| orn     | pp | lipY      |
| orn     | pp | Rv3861    |
| Rv3099c | pp | Rv3327    |
| rpsH    | pp | Rv2665    |
| rpsH    | pp | dapB      |
| rpsH    | pp | nuoC      |
| rpsH    | pp | Rv1044    |
| mrr     | pp | aroE      |
| leuB    | pp | Rv3552    |
| leuB    | pp | Rv3661    |
| leuB    | pp | nuoJ      |
| leuB    | pp | rimI      |
| coaE    | pp | trcX      |
| glgP    | pp | bkdA      |
| glgP    | pp | Rv2085    |
| glgP    | pp | Rv1510    |
| glgP    | pp | Rv3837c   |
| glgP    | pp | manB      |
| dnaJ2   | pp | ligC      |
| dnaJ2   | pp | pknK      |
| dnaJ2   | pp | Rv2752c   |
| corA    | pp | Rv1276c   |
| corA    | pp | Rv2867c   |
| corA    | pp | Rv3745c   |
| TB15.3  | pp | Rv3818    |
| TB15.3  | pp | Rv2695    |
| proC    | pp | PE_PGRS60 |
| fabG4   | pp | lppJ      |
| Rv1544  | pp | ndkA      |
| Rv1544  | pp | Rv3069    |
| Rv1544  | pp | Rv2256c   |
| Rv1544  | pp | Rv2323c   |
| Rv2280  | pp | Rv3327    |
| fadA3   | pp | echA14    |
| fadA3   | pp | Rv2369c   |
| fadA3   | pp | lppO      |
| fadA3   | pp | Rv1455    |
| fadA3   | pp | Rv3085    |
| fadA3   | pp | pptT      |
| fadA3   | pp | Rv2665    |
| Rv0854  | pp | mpt53     |
| Rv0854  | pp | dapB      |
| Rv0854  | pp | trpC      |
| Rv0854  | pp | Rv3778c   |
| Rv0854  | pp | Rv2787    |
| Rv0854  | pp | Rv3312A   |
| pknD    | pp | Rv1354c   |
| pknD    | pp | kasA      |
| pknD    | pp | apa       |
| pknD    | pp | whiB7     |
| pknD    | pp | Rv2361c   |
| gpgP    | pp | aspS      |
| gpgP    | pp | Rv2808    |
| gpgP    | pp | ephG      |
| gpgP    | pp | Rv3073c   |
| gpgP    | pp | Rv3072c   |
| gpgP    | pp | Rv3475    |
| gpgP    | pp | echA18.1  |
| gpgP    | pp | Rv3807c   |
| Rv2454c | pp | Rv2622    |
| Rv2454c | pp | fadE35    |
| Rv1996  | pp | Rv2665    |
| Rv1996  | pp | Rv3440c   |
| rplJ    | pp | nuoI      |
| rplJ    | pp | fadD11.1  |
| rplJ    | pp | Rv2619c   |
| rplJ    | pp | mazF9     |
| rplJ    | pp | pknI      |
| rplJ    | pp | end       |
| rplJ    | pp | cysN      |
| rplJ    | pp | Rv1443c   |
| fadD31  | pp | esxO      |
| fadD31  | pp | aroK      |
| fadD31  | pp | PE_PGRS41 |

|         |    |           |
|---------|----|-----------|
| fadD31  | pp | esxR      |
| fadD31  | pp | glnD      |
| fadD31  | pp | PPE50     |
| rpmF    | pp | bcpB      |
| rpmF    | pp | Rv1060    |
| Rv1928c | pp | vapC35    |
| bfrA    | pp | bfrA      |
| bfrA    | pp | Rv3836    |
| bfrA    | pp | proA      |
| Rv2406c | pp | vapC47    |
| Rv2406c | pp | Rv3741c   |
| qor     | pp | Rv2639c   |
| qor     | pp | Rv2669    |
| qor     | pp | Rv2688c   |
| qor     | pp | lytB1     |
| qor     | pp | cut4      |
| sigK    | pp | Rv3474    |
| sigK    | pp | rpsE      |
| sigK    | pp | PPE22     |
| sigK    | pp | Rv1051c   |
| sigK    | pp | aroF      |
| sigK    | pp | Rv2170    |
| sigK    | pp | Rv2653c   |
| sigK    | pp | Rv2585c   |
| Rv1148c | pp | Rv3422c   |
| Rv1148c | pp | PE34      |
| Rv1894c | pp | Rv2618    |
| Rv1894c | pp | Rv2052c   |
| Rv1738  | pp | rnc       |
| Rv1738  | pp | Rv2683    |
| Rv1738  | pp | Rv2851c   |
| acyP    | pp | esxD      |
| acyP    | pp | Rv3243c   |
| Rv0247c | pp | rip       |
| Rv0247c | pp | Rv2640c   |
| fadE25  | pp | asd       |
| Rv2296  | pp | lppQ      |
| Rv2296  | pp | Rv2554c   |
| Rv2410c | pp | fadE30    |
| ahpC    | pp | Rv3753c   |
| Rv0044c | pp | dapB      |
| Rv0044c | pp | whiB7     |
| Rv0044c | pp | purE      |
| Rv0044c | pp | Rv3529c   |
| Rv0044c | pp | Rv0894    |
| Rv0044c | pp | Rv1104    |
| Rv0044c | pp | Rv2323c   |
| Rv2172c | pp | dapB      |
| Rv2172c | pp | Rv3085    |
| acg     | pp | Rv2767c   |
| cmaA2   | pp | Rv2437    |
| cmaA2   | pp | clpP1     |
| cmaA2   | pp | Rv2468c   |
| cmaA2   | pp | Rv3216    |
| cmaA2   | pp | Rv3243c   |
| msrA    | pp | esxQ      |
| fadE23  | pp | Rv3180c   |
| rpmG2   | pp | Rv0679c   |
| rpmG2   | pp | Rv1919c   |
| rpmG2   | pp | PE29      |
| rpmG2   | pp | Rv1321    |
| rpmG2   | pp | Rv1444c   |
| hsaC    | pp | Rv3770B   |
| end     | pp | whiB3     |
| end     | pp | Rv2525c   |
| end     | pp | Rv2475c   |
| end     | pp | PE_PGRS39 |
| Rv2182c | pp | Rv3134c   |
| Rv2083  | pp | Rv2979c   |
| Rv2083  | pp | Rv2825c   |
| Rv2083  | pp | Rv3583c   |
| Rv2409c | pp | ppa       |
| Rv2409c | pp | spoU      |
| Rv2409c | pp | dapB      |
| mec     | pp | hisB      |
| mec     | pp | argC      |
| mec     | pp | Rv3322c   |
| mec     | pp | whiB1     |
| Rv1944c | pp | Rv2581c   |
| Rv0791c | pp | fadE23    |
| Rv2581c | pp | Rv3600c   |

|         |    |           |
|---------|----|-----------|
| Rv2581c | pp | Rv3172c   |
| Rv2581c | pp | Rv2650c   |
| Rv2581c | pp | hupB      |
| Rv2581c | pp | cysG      |
| Rv2581c | pp | hsdM      |
| hadB    | pp | ubiA      |
| hadB    | pp | Rv3541c   |
| hadB    | pp | kdpD      |
| hadB    | pp | hisI      |
| hadB    | pp | lgt       |
| hadB    | pp | Rv1728c   |
| hadB    | pp | ureB      |
| hadB    | pp | mbtI      |
| hadB    | pp | eis       |
| hadB    | pp | leuB      |
| hadB    | pp | lpqU      |
| rplF    | pp | plcD      |
| rpsR1   | pp | Rv3092c   |
| rpsR1   | pp | vapC42    |
| rpsR1   | pp | PPE64     |
| rpsR1   | pp | Rv3231c   |
| rpsR1   | pp | PE_PGRS62 |
| rpsR1   | pp | Rv1044    |
| rpsR1   | pp | fum       |
| rpsR1   | pp | nadD      |
| rplE    | pp | Rv2136c   |
| rplE    | pp | Rv2993c   |
| rplE    | pp | PE7       |
| rplE    | pp | Rv1455    |
| udgB    | pp | ligC      |
| udgB    | pp | Rv3474    |
| udgB    | pp | PPE37     |
| udgB    | pp | Rv1958c   |
| udgB    | pp | Rv1577c   |
| dapB    | pp | pknI      |
| dapB    | pp | mapB      |
| dapB    | pp | glnD      |
| dapB    | pp | ffh       |
| dapB    | pp | Rv2810c   |
| dapB    | pp | Rv3073c   |
| dapB    | pp | pknK      |
| dapB    | pp | agpS      |
| dapB    | pp | nuoJ      |
| dapB    | pp | Rv2944    |
| dapB    | pp | esxR      |
| dapB    | pp | PPE48     |
| dapB    | pp | Rv3046c   |
| dapB    | pp | Rv3224    |
| dapB    | pp | Rv3277    |
| dapB    | pp | PPE54     |
| dapB    | pp | Rv3346c   |
| dapB    | pp | Rv3180c   |
| dapB    | pp | Rv3182    |
| dapB    | pp | Rv3209    |
| dapB    | pp | TB7.3     |
| dapB    | pp | PE_PGRS57 |
| dapB    | pp | Rv3559c   |
| dapB    | pp | PE31      |
| dapB    | pp | PPE60     |
| dapB    | pp | ppa       |
| dapB    | pp | Rv3660c   |
| dapB    | pp | Rv3572    |
| dapB    | pp | ispF      |
| dapB    | pp | Rv3387    |
| dapB    | pp | Rv3400    |
| dapB    | pp | Rv3352c   |
| dapB    | pp | amiD      |
| dapB    | pp | Rv3434c   |
| dapB    | pp | Rv3475    |
| dapB    | pp | Rv3421c   |
| dapB    | pp | Rv3422c   |
| dapB    | pp | esxE      |
| dapB    | pp | embC      |
| dapB    | pp | Rv3788    |
| dapB    | pp | PE34      |
| dapB    | pp | Rv3669    |
| dapB    | pp | eccCa1    |
| dapB    | pp | espR      |
| dapB    | pp | papA1     |
| dapB    | pp | Rv3818    |
| serA1   | pp | wbbL1     |

|         |    |         |
|---------|----|---------|
| Rv1245c | pp | Rv2309A |
| Rv1245c | pp | Rv2449c |
| Rv1245c | pp | Rv2730  |
| Rv1245c | pp | Rv3143  |
| Rv1245c | pp | Rv3209  |
| Rv1245c | pp | Rv3243c |
| Rv1245c | pp | Rv3736  |
| Rv1245c | pp | tpx     |
| Rv1245c | pp | aspS    |
| topA    | pp | Rv3741c |
| topA    | pp | PPE67   |
| aspS    | pp | Rv2857c |
| aspS    | pp | Rv3836  |
| Rv0953c | pp | Rv3599c |
| Rv0953c | pp | Rv2998A |
| Rv0953c | pp | Rv2910c |
| Rv0953c | pp | Rv1081c |
| Rv0953c | pp | tlyA    |
| Rv0953c | pp | gabT    |
| Rv0953c | pp | cmaA1   |
| Rv0088  | pp | Rv1882c |
| Rv0088  | pp | Rv3717  |
| nadC    | pp | Rv3552  |
| nadC    | pp | Rv3718c |
| nadC    | pp | Rv3047c |
| nadC    | pp | Rv3134c |
| nadC    | pp | Rv2260  |
| nadC    | pp | ahpD    |
| nadC    | pp | fabG3   |
| nadC    | pp | Rv1870c |
| aroF    | pp | Rv2554c |
| aroF    | pp | vapB19  |
| aroF    | pp | vapB21  |
| aroF    | pp | Rv2621c |
| aroF    | pp | hsaE    |
| aroF    | pp | ispD    |
| aroF    | pp | serB2   |
| aroF    | pp | whiB3   |
| aroF    | pp | Rv3672c |
| aroF    | pp | Rv3844  |
| tesA    | pp | eccCb1  |
| wag31   | pp | Rv2560  |
| wag31   | pp | Rv2665  |
| wag31   | pp | Rv3485c |
| wag31   | pp | Rv3741c |
| wag31   | pp | Rv3134c |
| wag31   | pp | whiB3   |
| nusB    | pp | Rv3815c |
| nusB    | pp | Rv3840  |
| accD2   | pp | Rv1868  |
| Rv2285  | pp | Rv2407  |
| Rv2285  | pp | Rv2633c |
| Rv2285  | pp | Rv2644c |
| Rv2285  | pp | Rv2798c |
| Rv2285  | pp | truA    |
| pstS2   | pp | espC    |
| pstS2   | pp | Rv3528c |
| pstS2   | pp | Rv3353c |
| pstS2   | pp | Rv3067  |
| pstS2   | pp | cfp6    |
| pstS2   | pp | Rv2991  |
| pstS2   | pp | Rv2817c |
| pstS2   | pp | recO    |
| pstS2   | pp | Rv2307D |
| pstS2   | pp | Rv2295  |
| pstS2   | pp | Rv2280  |
| pstS2   | pp | Rv1517  |
| pstS2   | pp | mbtK    |
| pstS2   | pp | Rv1273c |
| pstS2   | pp | vapB33  |
| pstS2   | pp | Rv1209  |
| pstS2   | pp | Rv1155  |
| pstS2   | pp | celA2b  |
| tuf     | pp | Rv3840  |
| argF    | pp | PPE38   |
| argF    | pp | Rv2189c |
| gltA2   | pp | Rv3850  |
| Rv1864c | pp | Rv2022c |
| Rv0493c | pp | mapB    |
| Rv0493c | pp | sigB    |
| Rv0493c | pp | mazF8   |



|         |    |         |
|---------|----|---------|
| Rv0493c | pp | Rv3422c |
| Rv0493c | pp | Rv2669  |
| Rv0493c | pp | Rv3510c |
| Rv0493c | pp | Rv3813c |
| Rv3600c | pp | Rv3745c |
| Rv3600c | pp | Rv3680  |
| Rv3600c | pp | esxD    |
| Rv3600c | pp | esxB    |
| Rv3600c | pp | gltD    |
| Rv1324  | pp | Rv2308  |
| groEL2  | pp | Rv2960c |
| groEL2  | pp | Rv1188  |
| groEL2  | pp | PE9     |
| groEL2  | pp | mapA    |
| groEL2  | pp | Rv3272  |
| ald     | pp | acyP    |
| ald     | pp | Rv2867c |
| ald     | pp | Rv3686c |
| ald     | pp | esxR    |
| rpsA    | pp | Rv2307B |
| rplO    | pp | Rv3422c |
| rplO    | pp | cmr     |
| rplO    | pp | oppD    |
| rplO    | pp | ligA    |
| rplO    | pp | mscR    |
| rplO    | pp | Rv3137  |
| rplO    | pp | serB2   |
| umaA    | pp | uvrD1   |
| umaA    | pp | Rv1638A |
| umaA    | pp | Rv0893c |
| umaA    | pp | Rv2510c |
| umaA    | pp | Rv2851c |
| umaA    | pp | lppG    |
| umaA    | pp | kasB    |
| umaA    | pp | vapC48  |
| Rv3311  | pp | fdxB    |
| sigH    | pp | Rv3282  |
| trpC    | pp | parB    |
| trpC    | pp | Rv3740c |
| trpC    | pp | Rv2269c |
| trpC    | pp | whiB7   |
| trpC    | pp | rbfA    |
| trpC    | pp | Rv2481c |
| trpC    | pp | mbtH    |
| rpsS    | pp | PPE22   |
| rpsS    | pp | Rv2250A |
| rpsS    | pp | uspC    |
| rpsS    | pp | Rv2658c |
| rpsS    | pp | Rv1155  |
| rpsS    | pp | trxC    |
| rpsS    | pp | nuoI    |
| rpsS    | pp | Rv2730  |
| rpsS    | pp | Rv3226c |
| rpsS    | pp | gpm2    |
| pknG    | pp | Rv2809  |
| pknG    | pp | whiB7   |
| Rv1770  | pp | Rv2085  |
| Rv2405  | pp | dapB    |
| Rv2405  | pp | vapB19  |
| Rv2405  | pp | ribD    |
| Rv2405  | pp | Rv3785  |
| Rv1443c | pp | Rv2774c |
| Rv1443c | pp | Rv2561  |
| Rv1443c | pp | Rv3213c |
| Rv1443c | pp | Rv2775  |
| Rv1443c | pp | Rv2219A |
| Rv1443c | pp | lppO    |
| Rv1443c | pp | vapB18  |
| Rv0250c | pp | fabD2   |
| Rv0250c | pp | ptkA    |
| echA8   | pp | proW    |
| echA8   | pp | Rv3847  |
| moeA1   | pp | pepB    |
| eno     | pp | Rv1532c |
| fadE2   | pp | Rv0488  |
| fadE2   | pp | hadC    |
| fadE2   | pp | Rv0216  |
| fadE2   | pp | deoC    |
| fadE2   | pp | gcvT    |
| fadE2   | pp | Rv3662c |
| fadE2   | pp | fucA    |

|         |    |         |
|---------|----|---------|
| fadE2   | pp | Rv1574  |
| fadE2   | pp | Rv3719  |
| Rv2765  | pp | Rv2821c |
| Rv2765  | pp | Rv3520c |
| Rv2765  | pp | Rv3718c |
| Rv2765  | pp | cobB    |
| Rv2765  | pp | amiA1   |
| Rv2765  | pp | esxA    |
| mmaA2   | pp | Rv0909  |
| mmaA2   | pp | Rv3271c |
| glyS    | pp | Rv3387  |
| glyS    | pp | apt     |
| glyS    | pp | Rv2390c |
| Rv2159c | pp | Rv2250A |
| metK    | pp | vapC48  |
| metK    | pp | Rv2825c |
| metK    | pp | lppI    |
| metK    | pp | Rv1567c |
| Rv0315  | pp | Rv3600c |
| Rv0315  | pp | Rv3231c |
| Rv0315  | pp | Rv1374c |
| Rv0315  | pp | Rv0345  |
| Rv2927c | pp | Rv3412  |
| echA1   | pp | hisB    |
| echA1   | pp | Rv1257c |
| echA1   | pp | Rv0979c |
| inhA    | pp | Rv1941  |
| inhA    | pp | Rv2292c |
| inhA    | pp | Rv3129  |
| inhA    | pp | Rv3278c |
| inhA    | pp | PPE55   |
| inhA    | pp | Rv3583c |
| inhA    | pp | esxV    |
| inhA    | pp | Rv3745c |
| inhA    | pp | espG2   |
| Rv2074  | pp | murD    |
| Rv2074  | pp | whiB3   |
| Rv2074  | pp | rnpA    |
| Rv2074  | pp | Rv2558  |
| Rv2074  | pp | Rv3050c |
| Rv2074  | pp | Rv3548c |
| Rv2074  | pp | Rv3912  |
| trpG    | pp | Rv1321  |
| trpG    | pp | dapB    |
| trpG    | pp | whiB7   |
| trpG    | pp | echA19  |
| trpG    | pp | espG2   |
| trpG    | pp | parB    |
| hemD    | pp | Rv2203  |
| prcA    | pp | Rv2136c |
| prcA    | pp | Rv2191  |
| prcA    | pp | murX    |
| prcA    | pp | ligC    |
| prcA    | pp | Rv3780  |
| prcA    | pp | dctA    |
| prcA    | pp | secF    |
| prcA    | pp | Rv2732c |
| prcA    | pp | Rv3209  |
| fadE12  | pp | snoP    |
| fadE12  | pp | Rv2669  |
| eccC5   | pp | Rv1975  |
| Rv0466  | pp | PE15    |
| Rv0466  | pp | vapB19  |
| Rv0466  | pp | rshA    |
| Rv0466  | pp | Rv2475c |
| Rv0466  | pp | Rv1772  |
| echA7   | pp | Rv1358  |
| echA7   | pp | adhA    |
| echA7   | pp | Rv2401A |
| echA7   | pp | Rv3224B |
| echA7   | pp | arsB2   |
| echA7   | pp | Rv3821  |
| echA7   | pp | Rv1290A |
| ribH    | pp | ureB    |
| ribH    | pp | Rv2717c |
| aceE    | pp | Rv3143  |
| Rv1558  | pp | bioD    |
| Rv1558  | pp | Rv2509  |
| Rv2230c | pp | wbbL1   |
| Rv2230c | pp | Rv3047c |
| Rv2230c | pp | Rv3583c |

|         |    |         |
|---------|----|---------|
| Rv2993c | pp | mrsA    |
| Rv2993c | pp | Rv3235  |
| Rv2993c | pp | Rv3085  |
| accD1   | pp | Rv2636  |
| dapA    | pp | Rv3387  |
| dapA    | pp | wbbL1   |
| atpD    | pp | Rv3583c |
| accA3   | pp | Rv3583c |
| tpx     | pp | Rv3915  |
| tpx     | pp | apt     |
| tpx     | pp | echA21  |
| Rv1276c | pp | lpqD    |
| Rv1276c | pp | malQ    |
| Rv1276c | pp | argC    |
| Rv1276c | pp | Rv3094c |
| Rv1276c | pp | Rv2680  |
| Rv1276c | pp | Rv3253c |
| Rv1276c | pp | Rv3699  |
| Rv1276c | pp | Rv2464c |
| aroB    | pp | PPE69   |
| Rv3131  | pp | Rv3920c |
| Rv3131  | pp | Rv3726  |
| Rv3131  | pp | Rv3521  |
| Rv3131  | pp | esxE    |
| Rv1627c | pp | vapC38  |
| dlaT    | pp | snoP    |
| dlaT    | pp | viuB    |
| dlaT    | pp | Rv3235  |
| Rv1155  | pp | glpD2   |
| Rv1155  | pp | hemY    |
| Rv1155  | pp | pfkB    |
| Rv1155  | pp | dapB    |
| Rv1155  | pp | hflX    |
| Rv1155  | pp | Rv1597  |
| Rv1155  | pp | Rv2966c |
| Rv1155  | pp | Rv3182  |
| rplN    | pp | Rv1870c |
| rplN    | pp | Rv2717c |
| rplN    | pp | usfY    |
| murA    | pp | Rv2475c |
| murA    | pp | Rv2844  |
| murA    | pp | dapB    |
| Rv2569c | pp | Rv2805  |
| Rv2569c | pp | Rv2695  |
| Rv2569c | pp | glpQ1   |
| aroG    | pp | cobO    |
| aroG    | pp | echA19  |
| aroG    | pp | Rv2696c |
| aroG    | pp | dapB    |
| aroG    | pp | Rv3707c |
| aroG    | pp | Rv2189c |
| aroG    | pp | Rv2258c |
| rpmD    | pp | fecB    |
| rpmD    | pp | Rv1287  |
| Rv2475c | pp | accA1   |
| Rv2475c | pp | Rv2730  |
| Rv2475c | pp | Rv2808  |
| Rv2475c | pp | Rv2475c |
| Rv2475c | pp | Rv2581c |
| Rv2475c | pp | Rv2676c |
| glnA1   | pp | Rv2880c |
| glnA1   | pp | Rv2598  |
| ceoB    | pp | esxB    |
| ceoB    | pp | Rv3916c |
| ceoB    | pp | ceoC    |
| ceoB    | pp | pmmB    |
| Rv0272c | pp | Rv3780  |
| Rv0272c | pp | Rv2033c |
| Rv0272c | pp | hsdS.1  |
| Rv0272c | pp | PE22    |
| Rv0272c | pp | mce2R   |
| fadE15  | pp | dapB    |
| fadE15  | pp | Rv2669  |
| serC    | pp | sdhB    |
| serC    | pp | Rv3210c |
| serC    | pp | dapB    |
| serC    | pp | Rv1413  |
| serC    | pp | Rv1060  |
| rmlA    | pp | Rv0804  |
| rmlA    | pp | rplM    |
| rmlA    | pp | hsdS    |

|         |    |           |
|---------|----|-----------|
| kasA    | pp | kasB      |
| kasA    | pp | dapB      |
| kasA    | pp | pknK      |
| kasA    | pp | Rv3126c   |
| gabD1   | pp | espG2     |
| gabD1   | pp | wbbL1     |
| gabD1   | pp | Rv1638A   |
| gabD1   | pp | trpA      |
| gabD1   | pp | Rv1546    |
| gabD1   | pp | glpQ2     |
| gabD1   | pp | tesA      |
| gabD1   | pp | Rv2910c   |
| gabD1   | pp | Rv2407    |
| gabD1   | pp | moeX      |
| gabD1   | pp | Rv0295c   |
| rplK    | pp | Rv2003c   |
| rplK    | pp | lppQ      |
| rplK    | pp | Rv2993c   |
| rplK    | pp | whiB3     |
| rplK    | pp | rplJ      |
| rplK    | pp | ptrBa     |
| rplK    | pp | Rv0944    |
| rplK    | pp | Rv1060    |
| Rv3224  | pp | Rv3632    |
| Rv3224  | pp | Rv3520c   |
| Rv3224  | pp | echA20    |
| Rv2477c | pp | fadE23    |
| Rv2206  | pp | esxO      |
| Rv2206  | pp | PE_PGRS41 |
| gyrB    | pp | Rv1455    |
| gyrB    | pp | Rv2323c   |
| gyrB    | pp | Rv2645    |
| gyrB    | pp | Rv1580c   |
| gyrB    | pp | Rv1975    |
| gyrB    | pp | Rv2654c   |
| acpM    | pp | Rv2560    |
| metC    | pp | cut3      |
| metC    | pp | glpQ1     |
| phoY2   | pp | Rv1105    |
| phoY2   | pp | Rv3422c   |
| phoY2   | pp | PPE38     |
| Rv3075c | pp | Rv3183    |
| Rv3075c | pp | Rv3241c   |
| metZ    | pp | dapB      |
| metZ    | pp | Rv2636    |
| metZ    | pp | PE10      |
| metZ    | pp | Rv3528c   |
| rpiB    | pp | Rv3686c   |
| rpiB    | pp | Rv3745c   |
| rpiB    | pp | Rv2806    |
| rpiB    | pp | Rv3672c   |
| rpiB    | pp | dapB      |
| Rv1978  | pp | Rv3654c   |
| Rv1978  | pp | Rv2825c   |
| Rv1978  | pp | Rv2970A   |
| Rv1978  | pp | ppk1      |
| fadB2   | pp | ceoB      |
| glpX    | pp | drrC      |
| glpX    | pp | Rv1321    |
| glpX    | pp | Rv3528c   |
| garA    | pp | Rv2269c   |
| garA    | pp | Rv2478c   |
| garA    | pp | Rv2016    |
| pgi     | pp | uvrD1     |
| glyA1   | pp | pks12     |
| ilvD    | pp | ndkA      |
| ilvD    | pp | prcA      |
| rplI    | pp | Rv2705c   |
| rplI    | pp | rpsT      |
| rplI    | pp | mhuD      |
| rplI    | pp | rpsB      |
| rplI    | pp | Rv0919    |
| rplI    | pp | Rv0837c   |
| rplI    | pp | mgtC      |
| rplI    | pp | priA      |
| rplI    | pp | cfp29     |
| rplI    | pp | PPE12     |
| fas     | pp | Rv2577    |
| fas     | pp | PPE48     |
| Rv3520c | pp | PE33      |
| Rv3520c | pp | echA21    |

|         |    |           |
|---------|----|-----------|
| vapC17  | pp | Rv2969c   |
| tal     | pp | lipB      |
| tal     | pp | sigB      |
| tal     | pp | Rv2665    |
| tal     | pp | Rv3422c   |
| fadD24  | pp | Rv2240c   |
| fadD24  | pp | Rv3180c   |
| Rv2061c | pp | Rv3422c   |
| aroA    | pp | Rv3669    |
| aroA    | pp | accD5     |
| aroA    | pp | wbbL1     |
| rpsG    | pp | Rv2125    |
| rpsG    | pp | Rv0744c   |
| rpsG    | pp | rpsB      |
| rpsG    | pp | lppQ      |
| cmaA1   | pp | Rv3780    |
| cmaA1   | pp | esxU      |
| nuoF    | pp | parA      |
| entC    | pp | rsbW      |
| pyrB    | pp | ceoB      |
| pyrB    | pp | Rv2669    |
| pyrB    | pp | Rv3131    |
| glmS    | pp | Rv3827c   |
| Rv1855c | pp | whiB7     |
| Rv1855c | pp | Rv2091c   |
| lytB2   | pp | mazE4     |
| lytB2   | pp | gltS      |
| Rv1232c | pp | Rv2728c   |
| Rv1232c | pp | Rv2019    |
| Rv1232c | pp | Rv3488    |
| Rv1232c | pp | Rv3000    |
| fadE19  | pp | gatA      |
| fadE19  | pp | Rv3126c   |
| fadB    | pp | Rv0997    |
| fadB    | pp | Rv1951c   |
| fadB    | pp | Rv2078    |
| ilvE    | pp | TB7.3     |
| ilvE    | pp | mpt83     |
| ilvE    | pp | Rv2696c   |
| ilvE    | pp | ahpD      |
| ilvE    | pp | ilvE      |
| Rv2953  | pp | lat       |
| echA19  | pp | Rv3771c   |
| echA19  | pp | hsaC      |
| echA19  | pp | Rv3732    |
| Rv0738  | pp | Rv2033c   |
| Rv0738  | pp | Rv2696c   |
| Rv0738  | pp | Rv3467    |
| Rv0738  | pp | mazF4     |
| Rv0738  | pp | recO      |
| Rv0738  | pp | cysH      |
| Rv0738  | pp | ahpD      |
| Rv0738  | pp | mesJ      |
| TB27.3  | pp | ligC      |
| TB27.3  | pp | PPE65     |
| TB27.3  | pp | Rv1924c   |
| TB27.3  | pp | Rv2446c   |
| TB27.3  | pp | folC      |
| TB27.3  | pp | rpfE      |
| TB27.3  | pp | Rv2459    |
| TB27.3  | pp | Rv2507    |
| TB27.3  | pp | Rv2509    |
| TB27.3  | pp | espD      |
| TB27.3  | pp | Rv0625c   |
| TB27.3  | pp | Rv0921    |
| TB27.3  | pp | Rv1050    |
| TB27.3  | pp | celA2a    |
| TB27.3  | pp | nadC      |
| TB27.3  | pp | cmk       |
| fadE6   | pp | secE2     |
| hupB    | pp | Rv3920c   |
| hupB    | pp | Rv3732    |
| hupB    | pp | Rv3213c   |
| hupB    | pp | entC      |
| hupB    | pp | Rv3353c   |
| hupB    | pp | PE_PGRS60 |
| gap     | pp | fadE17    |
| gap     | pp | Rv1829    |
| gap     | pp | devB      |
| gap     | pp | rpsO      |
| gap     | pp | Rv2475c   |

|        |    |         |
|--------|----|---------|
| gap    | pp | lppI    |
| Rv0221 | pp | sdhB    |
| Rv0221 | pp | sseA    |
| Rv0221 | pp | vapC40  |
| Rv0221 | pp | ogt     |
| Rv0221 | pp | Rv0263c |
| Rv0221 | pp | Rv2307B |
| Rv0221 | pp | Rv3085  |
| Rv0221 | pp | Rv3583c |
| desA1  | pp | Rv3134c |
| desA1  | pp | argC    |
| desA1  | pp | Rv1532c |
| Rv0785 | pp | Rv1044  |
| Rv0785 | pp | Rv1634  |
| Rv0785 | pp | esxV    |
| Rv0785 | pp | cut3    |
