# Supplementary material
Source: PubMed Central journal article supplement (PMC4390261)
Supplement: supp_M114.045922_mcp.M114.045922-8.pdf [file supp_M114.045922_mcp.M114.045922-8.pdf]

**Table S7A. Complete list of succinylated proteins according to their function category.**

| ID           | Synonym | Functional category          |
|--------------|---------|------------------------------|
| gi 15607321  | Rv0180c | cell wall and cell processes |
| gi 15607488  | Rv0347  | cell wall and cell processes |
| gi 57116727  | Rv0379  | cell wall and cell processes |
| gi 15607535  | Rv0394c | cell wall and cell processes |
| gi 15607616  | Rv0475  | cell wall and cell processes |
| gi 15607623  | Rv0482  | cell wall and cell processes |
| gi 15607654  | Rv0513  | cell wall and cell processes |
| gi 15607744  | Rv0604  | cell wall and cell processes |
| gi 15607795  | Rv0655  | cell wall and cell processes |
| gi 15607864  | Rv0724  | cell wall and cell processes |
| gi 15607961  | Rv0821c | cell wall and cell processes |
| gi 57116800  | Rv0932c | cell wall and cell processes |
| gi 15608158  | Rv1018c | cell wall and cell processes |
| gi 57116829  | Rv1110  | cell wall and cell processes |
| gi 15608379  | Rv1239c | cell wall and cell processes |
| gi 15608455  | Rv1315  | cell wall and cell processes |
| gi 15608626  | Rv1488  | cell wall and cell processes |
| gi 448816588 | Rv1783  | cell wall and cell processes |
| gi 15608958  | Rv1821  | cell wall and cell processes |
| gi 15609117  | Rv1980c | cell wall and cell processes |
| gi 15609282  | Rv2145c | cell wall and cell processes |
| gi 57116956  | Rv2206  | cell wall and cell processes |
| gi 15609599  | Rv2462c | cell wall and cell processes |
| gi 15609614  | Rv2477c | cell wall and cell processes |
| gi 57117015  | Rv2691  | cell wall and cell processes |
| gi 57117016  | Rv2692  | cell wall and cell processes |
| gi 448824790 | Rv2790c | cell wall and cell processes |
| gi 57117036  | Rv2922c | cell wall and cell processes |
| gi 15610102  | Rv2965c | cell wall and cell processes |
| gi 15610106  | Rv2969c | cell wall and cell processes |
| gi 15610336  | Rv3200c | cell wall and cell processes |
| gi 57117081  | Rv3264c | cell wall and cell processes |
| gi 15610406  | Rv3270  | cell wall and cell processes |
| gi 15610590  | Rv3454  | cell wall and cell processes |
| gi 15610805  | Rv3669  | cell wall and cell processes |
| gi 15610945  | Rv3809c | cell wall and cell processes |
| gi 15607201  | Rv0059  | conserved hypotheticals      |
| gi 15607230  | Rv0088  | conserved hypotheticals      |
| gi 15607269  | Rv0127  | conserved hypotheticals      |
| gi 15607283  | Rv0141c | conserved hypotheticals      |
| gi 15607331  | Rv0190  | conserved hypotheticals      |
| gi 15607362  | Rv0221  | conserved hypotheticals      |
| gi 15607391  | Rv0250c | conserved hypotheticals      |
| gi 15607413  | Rv0272c | conserved hypotheticals      |
| gi 15607434  | Rv0293c | conserved hypotheticals      |
| gi 15607473  | Rv0332  | conserved hypotheticals      |
| gi 15607474  | Rv0333  | conserved hypotheticals      |
| gi 15607506  | Rv0365c | conserved hypotheticals      |
| gi 15607574  | Rv0433  | conserved hypotheticals      |
| gi 15607607  | Rv0466  | conserved hypotheticals      |
| gi 15607634  | Rv0493c | conserved hypotheticals      |
| gi 15607706  | Rv0566c | conserved hypotheticals      |
| gi 15607711  | Rv0571c | conserved hypotheticals      |
| gi 15607717  | Rv0577  | conserved hypotheticals      |
| gi 15607720  | Rv0580c | conserved hypotheticals      |
| gi 15607787  | Rv0647c | conserved hypotheticals      |
| gi 15607878  | Rv0738  | conserved hypotheticals      |
| gi 15607900  | Rv0760c | conserved hypotheticals      |
| gi 15607925  | Rv0785  | conserved hypotheticals      |
| gi 15607931  | Rv0791c | conserved hypotheticals      |
| gi 15607941  | Rv0801  | conserved hypotheticals      |
| gi 15607951  | Rv0811c | conserved hypotheticals      |
| gi 15607971  | Rv0831c | conserved hypotheticals      |
| gi 15607994  | Rv0854  | conserved hypotheticals      |
| gi 15608050  | Rv0910  | conserved hypotheticals      |
| gi 15608065  | Rv0925c | conserved hypotheticals      |
| gi 15608165  | Rv1025  | conserved hypotheticals      |
| gi 15608203  | Rv1063c | conserved hypotheticals      |
| gi 448824754 | Rv1099c | conserved hypotheticals      |
| gi 15608295  | Rv1155  | conserved hypotheticals      |
| gi 15608296  | Rv1156  | conserved hypotheticals      |
| gi 57116835  | Rv1159A | conserved hypotheticals      |
| gi 15608331  | Rv1191  | conserved hypotheticals      |
| gi 15608372  | Rv1232c | conserved hypotheticals      |
| gi 15608399  | Rv1259  | conserved hypotheticals      |
| gi 15608401  | Rv1261c | conserved hypotheticals      |
| gi 15608405  | Rv1265  | conserved hypotheticals      |
| gi 15608416  | Rv1276c | conserved hypotheticals      |

|              |         |                         |
|--------------|---------|-------------------------|
| gi 15608474  | Rv1334  | conserved hypotheticals |
| gi 15608560  | Rv1422  | conserved hypotheticals |
| gi 15608581  | Rv1443c | conserved hypotheticals |
| gi 15608670  | Rv1532c | conserved hypotheticals |
| gi 15608671  | Rv1533  | conserved hypotheticals |
| gi 15608696  | Rv1558  | conserved hypotheticals |
| gi 15608731  | Rv1593c | conserved hypotheticals |
| gi 15608736  | Rv1598c | conserved hypotheticals |
| gi 15608774  | Rv1636  | conserved hypotheticals |
| gi 15608870  | Rv1732c | conserved hypotheticals |
| gi 15608876  | Rv1738  | conserved hypotheticals |
| gi 15608900  | Rv1762c | conserved hypotheticals |
| gi 15608908  | Rv1770  | conserved hypotheticals |
| gi 15608964  | Rv1827  | conserved hypotheticals |
| gi 15608966  | Rv1829  | conserved hypotheticals |
| gi 15609001  | Rv1864c | conserved hypotheticals |
| gi 15609031  | Rv1894c | conserved hypotheticals |
| gi 15609033  | Rv1896c | conserved hypotheticals |
| gi 15609035  | Rv1898  | conserved hypotheticals |
| gi 15609056  | Rv1919c | conserved hypotheticals |
| gi 15609081  | Rv1944c | conserved hypotheticals |
| gi 15609115  | Rv1978  | conserved hypotheticals |
| gi 15609133  | Rv1996  | conserved hypotheticals |
| gi 15609142  | Rv2005c | conserved hypotheticals |
| gi 15609167  | Rv2030c | conserved hypotheticals |
| gi 15609169  | Rv2032  | conserved hypotheticals |
| gi 15609191  | Rv2054  | conserved hypotheticals |
| gi 15609198  | Rv2061c | conserved hypotheticals |
| gi 15609204  | Rv2067c | conserved hypotheticals |
| gi 15609211  | Rv2074  | conserved hypotheticals |
| gi 15609220  | Rv2083  | conserved hypotheticals |
| gi 15609234  | Rv2097c | conserved hypotheticals |
| gi 15609249  | Rv2112c | conserved hypotheticals |
| gi 15609277  | Rv2140c | conserved hypotheticals |
| gi 15609296  | Rv2159c | conserved hypotheticals |
| gi 15609303  | Rv2166c | conserved hypotheticals |
| gi 15609309  | Rv2172c | conserved hypotheticals |
| gi 15609319  | Rv2182c | conserved hypotheticals |
| gi 15609322  | Rv2185c | conserved hypotheticals |
| gi 15609367  | Rv2230c | conserved hypotheticals |
| gi 15609376  | Rv2239c | conserved hypotheticals |
| gi 15609422  | Rv2285  | conserved hypotheticals |
| gi 15609435  | Rv2298  | conserved hypotheticals |
| gi 15609451  | Rv2314c | conserved hypotheticals |
| gi 448824785 | Rv2402  | conserved hypotheticals |
| gi 15609542  | Rv2405  | conserved hypotheticals |
| gi 15609543  | Rv2406c | conserved hypotheticals |
| gi 15609546  | Rv2409c | conserved hypotheticals |
| gi 15609547  | Rv2410c | conserved hypotheticals |
| gi 15609603  | Rv2466c | conserved hypotheticals |
| gi 15609611  | Rv2474c | conserved hypotheticals |
| gi 15609612  | Rv2475c | conserved hypotheticals |
| gi 15609659  | Rv2522c | conserved hypotheticals |
| gi 15609706  | Rv2569c | conserved hypotheticals |
| gi 15609760  | Rv2623  | conserved hypotheticals |
| gi 15609761  | Rv2624c | conserved hypotheticals |
| gi 15609778  | Rv2641  | conserved hypotheticals |
| gi 15609812  | Rv2675c | conserved hypotheticals |
| gi 15609813  | Rv2676c | conserved hypotheticals |
| gi 15609853  | Rv2716  | conserved hypotheticals |
| gi 57117019  | Rv2744c | conserved hypotheticals |
| gi 15610005  | Rv2868c | conserved hypotheticals |
| gi 15610038  | Rv2901c | conserved hypotheticals |
| gi 15610064  | Rv2927c | conserved hypotheticals |
| gi 15610090  | Rv2953  | conserved hypotheticals |
| gi 15610128  | Rv2991  | conserved hypotheticals |
| gi 15610212  | Rv3075c | conserved hypotheticals |
| gi 15610224  | Rv3087  | conserved hypotheticals |
| gi 15610225  | Rv3088  | conserved hypotheticals |
| gi 15610231  | Rv3094c | conserved hypotheticals |
| gi 15610236  | Rv3099c | conserved hypotheticals |
| gi 448824799 | Rv3131  | conserved hypotheticals |
| gi 15610305  | Rv3169  | conserved hypotheticals |
| gi 57117069  | Rv3196A | conserved hypotheticals |
| gi 57117073  | Rv3208A | conserved hypotheticals |
| gi 15610346  | Rv3210c | conserved hypotheticals |
| gi 15610408  | Rv3272  | conserved hypotheticals |
| gi 15610417  | Rv3281  | conserved hypotheticals |
| gi 15610447  | Rv3311  | conserved hypotheticals |
| gi 15610646  | Rv3510c | conserved hypotheticals |
| gi 15610655  | Rv3519  | conserved hypotheticals |

|              |         |                         |
|--------------|---------|-------------------------|
| gi 15610678  | Rv3542c | conserved hypotheticals |
| gi 15610728  | Rv3592  | conserved hypotheticals |
| gi 15610733  | Rv3597c | conserved hypotheticals |
| gi 15610736  | Rv3600c | conserved hypotheticals |
| gi 15610814  | Rv3678c | conserved hypotheticals |
| gi 15610835  | Rv3699  | conserved hypotheticals |
| gi 15610852  | Rv3716c | conserved hypotheticals |
| gi 57117147  | Rv3722c | conserved hypotheticals |
| gi 15610870  | Rv3734c | conserved hypotheticals |
| gi 15610891  | Rv3755c | conserved hypotheticals |
| gi 15610955  | Rv3819  | conserved hypotheticals |
| gi 15610985  | Rv3849  | conserved hypotheticals |
| gi 15610986  | Rv3850  | conserved hypotheticals |
| gi 15611000  | Rv3864  | conserved hypotheticals |
| gi 15611016  | Rv3880c | conserved hypotheticals |
| gi 15611017  | Rv3881c | conserved hypotheticals |
| gi 15607144  | Rv0002  | information pathways    |
| gi 448824735 | Rv0005  | information pathways    |
| gi 15607148  | Rv0006  | information pathways    |
| gi 15607151  | Rv0009  | information pathways    |
| gi 15607195  | Rv0053  | information pathways    |
| gi 15607196  | Rv0054  | information pathways    |
| gi 57116686  | Rv0055  | information pathways    |
| gi 15607198  | Rv0056  | information pathways    |
| gi 15607586  | Rv0445c | information pathways    |
| gi 15607771  | Rv0631c | information pathways    |
| gi 57116764  | Rv0634B | information pathways    |
| gi 15607779  | Rv0639  | information pathways    |
| gi 15607780  | Rv0640  | information pathways    |
| gi 15607781  | Rv0641  | information pathways    |
| gi 15607791  | Rv0651  | information pathways    |
| gi 15607792  | Rv0652  | information pathways    |
| gi 15607807  | Rv0667  | information pathways    |
| gi 15607808  | Rv0668  | information pathways    |
| gi 15607810  | Rv0670  | information pathways    |
| gi 15607823  | Rv0683  | information pathways    |
| gi 57116768  | Rv0684  | information pathways    |
| gi 15607825  | Rv0685  | information pathways    |
| gi 15607840  | Rv0700  | information pathways    |
| gi 15607841  | Rv0701  | information pathways    |
| gi 15607842  | Rv0702  | information pathways    |
| gi 15607844  | Rv0704  | information pathways    |
| gi 15607845  | Rv0705  | information pathways    |
| gi 15607846  | Rv0706  | information pathways    |
| gi 15607847  | Rv0707  | information pathways    |
| gi 15607854  | Rv0714  | information pathways    |
| gi 15607855  | Rv0715  | information pathways    |
| gi 15607856  | Rv0716  | information pathways    |
| gi 15607858  | Rv0718  | information pathways    |
| gi 15607859  | Rv0719  | information pathways    |
| gi 15607862  | Rv0722  | information pathways    |
| gi 15607863  | Rv0723  | information pathways    |
| gi 57116808  | Rv0979A | information pathways    |
| gi 15608155  | Rv1015c | information pathways    |
| gi 15608432  | Rv1292  | information pathways    |
| gi 15608437  | Rv1297  | information pathways    |
| gi 15608480  | Rv1340  | information pathways    |
| gi 15608527  | Rv1388  | information pathways    |
| gi 15608674  | Rv1536  | information pathways    |
| gi 15608767  | Rv1629  | information pathways    |
| gi 15608768  | Rv1630  | information pathways    |
| gi 15608776  | Rv1638  | information pathways    |
| gi 15608779  | Rv1641  | information pathways    |
| gi 448824761 | Rv1649  | information pathways    |
| gi 15608788  | Rv1650  | information pathways    |
| gi 15609229  | Rv2092c | information pathways    |
| gi 15609494  | Rv2357c | information pathways    |
| gi 15609549  | Rv2412  | information pathways    |
| gi 15609579  | Rv2442c | information pathways    |
| gi 15609581  | Rv2444c | information pathways    |
| gi 15609585  | Rv2448c | information pathways    |
| gi 15609665  | Rv2528c | information pathways    |
| gi 15609670  | Rv2533c | information pathways    |
| gi 15609671  | Rv2534c | information pathways    |
| gi 15609692  | Rv2555c | information pathways    |
| gi 15609709  | Rv2572c | information pathways    |
| gi 15609751  | Rv2614c | information pathways    |
| gi 15609840  | Rv2703  | information pathways    |
| gi 15609920  | Rv2783c | information pathways    |
| gi 15609922  | Rv2785c | information pathways    |
| gi 15609976  | Rv2839c | information pathways    |

|              |         |                                         |
|--------------|---------|-----------------------------------------|
| gi 15609982  | Rv2845c | information pathways                    |
| gi 15610019  | Rv2882c | information pathways                    |
| gi 15610026  | Rv2889c | information pathways                    |
| gi 15610027  | Rv2890c | information pathways                    |
| gi 15610041  | Rv2904c | information pathways                    |
| gi 15610046  | Rv2909c | information pathways                    |
| gi 15610122  | Rv2985  | information pathways                    |
| gi 15610123  | Rv2986c | information pathways                    |
| gi 57117041  | Rv2992c | information pathways                    |
| gi 15610146  | Rv3009c | information pathways                    |
| gi 448824797 | Rv3011c | information pathways                    |
| gi 57117051  | Rv3048c | information pathways                    |
| gi 15610188  | Rv3051c | information pathways                    |
| gi 15610242  | Rv3105c | information pathways                    |
| gi 15610359  | Rv3223c | information pathways                    |
| gi 15610472  | Rv3336c | information pathways                    |
| gi 15610578  | Rv3442c | information pathways                    |
| gi 15610579  | Rv3443c | information pathways                    |
| gi 15610593  | Rv3457c | information pathways                    |
| gi 15610594  | Rv3458c | information pathways                    |
| gi 15610595  | Rv3459c | information pathways                    |
| gi 57117128  | Rv3580c | information pathways                    |
| gi 15610734  | Rv3598c | information pathways                    |
| gi 15610782  | Rv3646c | information pathways                    |
| gi 15610988  | Rv3852  | information pathways                    |
| gi 57117168  | Rv3907c | information pathways                    |
| gi 15608288  | Rv1148c | insertion seqs and phages               |
| gi 57116682  | Rv0013  | intermediary metabolism and respiration |
| gi 15607186  | Rv0044c | intermediary metabolism and respiration |
| gi 15607208  | Rv0066c | intermediary metabolism and respiration |
| gi 15607279  | Rv0137c | intermediary metabolism and respiration |
| gi 15607290  | Rv0148  | intermediary metabolism and respiration |
| gi 15607291  | Rv0149  | intermediary metabolism and respiration |
| gi 15607297  | Rv0155  | intermediary metabolism and respiration |
| gi 15607330  | Rv0189c | intermediary metabolism and respiration |
| gi 15607352  | Rv0211  | intermediary metabolism and respiration |
| gi 15607357  | Rv0216  | intermediary metabolism and respiration |
| gi 15607364  | Rv0223c | intermediary metabolism and respiration |
| gi 57116704  | Rv0234c | intermediary metabolism and respiration |
| gi 15607382  | Rv0241c | intermediary metabolism and respiration |
| gi 15607388  | Rv0247c | intermediary metabolism and respiration |
| gi 15607389  | Rv0248c | intermediary metabolism and respiration |
| gi 15607407  | Rv0266c | intermediary metabolism and respiration |
| gi 15607456  | Rv0315  | intermediary metabolism and respiration |
| gi 15607475  | Rv0334  | intermediary metabolism and respiration |
| gi 15607498  | Rv0357c | intermediary metabolism and respiration |
| gi 15607504  | Rv0363c | intermediary metabolism and respiration |
| gi 15607530  | Rv0389  | intermediary metabolism and respiration |
| gi 15607532  | Rv0391  | intermediary metabolism and respiration |
| gi 15607548  | Rv0407  | intermediary metabolism and respiration |
| gi 15607549  | Rv0408  | intermediary metabolism and respiration |
| gi 15607563  | Rv0422c | intermediary metabolism and respiration |
| gi 15607564  | Rv0423c | intermediary metabolism and respiration |
| gi 15607580  | Rv0439c | intermediary metabolism and respiration |
| gi 15607598  | Rv0457c | intermediary metabolism and respiration |
| gi 15607603  | Rv0462  | intermediary metabolism and respiration |
| gi 57116734  | Rv0467  | intermediary metabolism and respiration |
| gi 57116739  | Rv0489  | intermediary metabolism and respiration |
| gi 15607641  | Rv0500  | intermediary metabolism and respiration |
| gi 15607651  | Rv0510  | intermediary metabolism and respiration |
| gi 57116747  | Rv0511  | intermediary metabolism and respiration |
| gi 15607688  | Rv0548c | intermediary metabolism and respiration |
| gi 15607776  | Rv0636  | intermediary metabolism and respiration |
| gi 15607873  | Rv0733  | intermediary metabolism and respiration |
| gi 15607893  | Rv0753c | intermediary metabolism and respiration |
| gi 57116779  | Rv0761c | intermediary metabolism and respiration |
| gi 15607912  | Rv0772  | intermediary metabolism and respiration |
| gi 15607913  | Rv0773c | intermediary metabolism and respiration |
| gi 57116784  | Rv0794c | intermediary metabolism and respiration |
| gi 15607940  | Rv0800  | intermediary metabolism and respiration |
| gi 15607949  | Rv0809  | intermediary metabolism and respiration |
| gi 15607955  | Rv0815c | intermediary metabolism and respiration |
| gi 15607998  | Rv0858c | intermediary metabolism and respiration |
| gi 15608005  | Rv0865  | intermediary metabolism and respiration |
| gi 15608024  | Rv0884c | intermediary metabolism and respiration |
| gi 15608029  | Rv0889c | intermediary metabolism and respiration |
| gi 15608036  | Rv0896  | intermediary metabolism and respiration |
| gi 15608067  | Rv0927c | intermediary metabolism and respiration |
| gi 15608086  | Rv0946c | intermediary metabolism and respiration |
| gi 15608091  | Rv0951  | intermediary metabolism and respiration |
| gi 15608092  | Rv0952  | intermediary metabolism and respiration |

|              |         |                                         |
|--------------|---------|-----------------------------------------|
| gi 15608093  | Rv0953c | intermediary metabolism and respiration |
| gi 15608097  | Rv0957  | intermediary metabolism and respiration |
| gi 57116810  | Rv0994  | intermediary metabolism and respiration |
| gi 15608154  | Rv1014c | intermediary metabolism and respiration |
| gi 15608157  | Rv1017c | intermediary metabolism and respiration |
| gi 15608163  | Rv1023  | intermediary metabolism and respiration |
| gi 57116820  | Rv1077  | intermediary metabolism and respiration |
| gi 15608219  | Rv1079  | intermediary metabolism and respiration |
| gi 448824753 | Rv1093  | intermediary metabolism and respiration |
| gi 15608238  | Rv1098c | intermediary metabolism and respiration |
| gi 57116832  | Rv1121  | intermediary metabolism and respiration |
| gi 15608262  | Rv1122  | intermediary metabolism and respiration |
| gi 15608273  | Rv1133c | intermediary metabolism and respiration |
| gi 15608284  | Rv1144  | intermediary metabolism and respiration |
| gi 15608313  | Rv1173  | intermediary metabolism and respiration |
| gi 15608318  | Rv1178  | intermediary metabolism and respiration |
| gi 15608341  | Rv1201c | intermediary metabolism and respiration |
| gi 15608380  | Rv1240  | intermediary metabolism and respiration |
| gi 15608385  | Rv1245c | intermediary metabolism and respiration |
| gi 161352467 | Rv1248c | intermediary metabolism and respiration |
| gi 15608424  | Rv1284  | intermediary metabolism and respiration |
| gi 15608435  | Rv1295  | intermediary metabolism and respiration |
| gi 15608446  | Rv1306  | intermediary metabolism and respiration |
| gi 15608447  | Rv1307  | intermediary metabolism and respiration |
| gi 15608448  | Rv1308  | intermediary metabolism and respiration |
| gi 15608449  | Rv1309  | intermediary metabolism and respiration |
| gi 15608450  | Rv1310  | intermediary metabolism and respiration |
| gi 15608451  | Rv1311  | intermediary metabolism and respiration |
| gi 15608464  | Rv1324  | intermediary metabolism and respiration |
| gi 15608468  | Rv1328  | intermediary metabolism and respiration |
| gi 15608520  | Rv1380  | intermediary metabolism and respiration |
| gi 15608523  | Rv1383  | intermediary metabolism and respiration |
| gi 57116856  | Rv1384  | intermediary metabolism and respiration |
| gi 15608530  | Rv1391  | intermediary metabolism and respiration |
| gi 15608531  | Rv1392  | intermediary metabolism and respiration |
| gi 448824757 | Rv1416  | intermediary metabolism and respiration |
| gi 15608574  | Rv1436  | intermediary metabolism and respiration |
| gi 15608575  | Rv1437  | intermediary metabolism and respiration |
| gi 15608576  | Rv1438  | intermediary metabolism and respiration |
| gi 15608586  | Rv1448c | intermediary metabolism and respiration |
| gi 15608587  | Rv1449c | intermediary metabolism and respiration |
| gi 15608592  | Rv1454c | intermediary metabolism and respiration |
| gi 15608613  | Rv1475c | intermediary metabolism and respiration |
| gi 15608697  | Rv1559  | intermediary metabolism and respiration |
| gi 15608734  | Rv1596  | intermediary metabolism and respiration |
| gi 15608739  | Rv1601  | intermediary metabolism and respiration |
| gi 15608741  | Rv1603  | intermediary metabolism and respiration |
| gi 15608749  | Rv1611  | intermediary metabolism and respiration |
| gi 15608755  | Rv1617  | intermediary metabolism and respiration |
| gi 15608769  | Rv1631  | intermediary metabolism and respiration |
| gi 15608792  | Rv1654  | intermediary metabolism and respiration |
| gi 15608793  | Rv1655  | intermediary metabolism and respiration |
| gi 15608794  | Rv1656  | intermediary metabolism and respiration |
| gi 15608833  | Rv1695  | intermediary metabolism and respiration |
| gi 15608837  | Rv1699  | intermediary metabolism and respiration |
| gi 448824762 | Rv1703c | intermediary metabolism and respiration |
| gi 57116903  | Rv1731  | intermediary metabolism and respiration |
| gi 15608889  | Rv1751  | intermediary metabolism and respiration |
| gi 15608912  | Rv1774  | intermediary metabolism and respiration |
| gi 15608969  | Rv1832  | intermediary metabolism and respiration |
| gi 15608974  | Rv1837c | intermediary metabolism and respiration |
| gi 15608980  | Rv1843c | intermediary metabolism and respiration |
| gi 15608992  | Rv1855c | intermediary metabolism and respiration |
| gi 15609006  | Rv1869c | intermediary metabolism and respiration |
| gi 15609009  | Rv1872c | intermediary metabolism and respiration |
| gi 15609013  | Rv1876  | intermediary metabolism and respiration |
| gi 15609065  | Rv1928c | intermediary metabolism and respiration |
| gi 15609166  | Rv2029c | intermediary metabolism and respiration |
| gi 15609246  | Rv2109c | intermediary metabolism and respiration |
| gi 15609258  | Rv2121c | intermediary metabolism and respiration |
| gi 15609298  | Rv2161c | intermediary metabolism and respiration |
| gi 15609315  | Rv2178c | intermediary metabolism and respiration |
| gi 15609332  | Rv2195  | intermediary metabolism and respiration |
| gi 15609333  | Rv2196  | intermediary metabolism and respiration |
| gi 15609337  | Rv2200c | intermediary metabolism and respiration |
| gi 15609339  | Rv2202c | intermediary metabolism and respiration |
| gi 15609347  | Rv2210c | intermediary metabolism and respiration |
| gi 15609348  | Rv2211c | intermediary metabolism and respiration |
| gi 15609350  | Rv2213  | intermediary metabolism and respiration |
| gi 15609352  | Rv2215  | intermediary metabolism and respiration |
| gi 15609357  | Rv2220  | intermediary metabolism and respiration |

|              |         |                                         |
|--------------|---------|-----------------------------------------|
| gi 15609359  | Rv2222c | intermediary metabolism and respiration |
| gi 448824781 | Rv2241  | intermediary metabolism and respiration |
| gi 15609417  | Rv2280  | intermediary metabolism and respiration |
| gi 15609433  | Rv2296  | intermediary metabolism and respiration |
| gi 57116972  | Rv2334  | intermediary metabolism and respiration |
| gi 15609528  | Rv2391  | intermediary metabolism and respiration |
| gi 15609541  | Rv2404c | intermediary metabolism and respiration |
| gi 15609556  | Rv2419c | intermediary metabolism and respiration |
| gi 57116990  | Rv2438c | intermediary metabolism and respiration |
| gi 15609591  | Rv2454c | intermediary metabolism and respiration |
| gi 15609592  | Rv2455c | intermediary metabolism and respiration |
| gi 57116993  | Rv2465c | intermediary metabolism and respiration |
| gi 57116994  | Rv2467  | intermediary metabolism and respiration |
| gi 15609613  | Rv2476c | intermediary metabolism and respiration |
| gi 15609632  | Rv2495c | intermediary metabolism and respiration |
| gi 15609635  | Rv2498c | intermediary metabolism and respiration |
| gi 15609648  | Rv2511  | intermediary metabolism and respiration |
| gi 15609674  | Rv2537c | intermediary metabolism and respiration |
| gi 15609675  | Rv2538c | intermediary metabolism and respiration |
| gi 15609677  | Rv2540c | intermediary metabolism and respiration |
| gi 15609726  | Rv2589  | intermediary metabolism and respiration |
| gi 15609743  | Rv2606c | intermediary metabolism and respiration |
| gi 15609744  | Rv2607  | intermediary metabolism and respiration |
| gi 15609834  | Rv2697c | intermediary metabolism and respiration |
| gi 15609850  | Rv2713  | intermediary metabolism and respiration |
| gi 15609863  | Rv2726c | intermediary metabolism and respiration |
| gi 15609890  | Rv2753c | intermediary metabolism and respiration |
| gi 15609902  | Rv2765  | intermediary metabolism and respiration |
| gi 15609910  | Rv2773c | intermediary metabolism and respiration |
| gi 15609917  | Rv2780  | intermediary metabolism and respiration |
| gi 15609918  | Rv2781c | intermediary metabolism and respiration |
| gi 15609923  | Rv2786c | intermediary metabolism and respiration |
| gi 57117031  | Rv2861c | intermediary metabolism and respiration |
| gi 15610032  | Rv2895c | intermediary metabolism and respiration |
| gi 57117037  | Rv2922A | intermediary metabolism and respiration |
| gi 15610088  | Rv2951c | intermediary metabolism and respiration |
| gi 15610104  | Rv2967c | intermediary metabolism and respiration |
| gi 15610121  | Rv2984  | intermediary metabolism and respiration |
| gi 448824795 | Rv2993c | intermediary metabolism and respiration |
| gi 15610132  | Rv2995c | intermediary metabolism and respiration |
| gi 57117042  | Rv2996c | intermediary metabolism and respiration |
| gi 448824796 | Rv3001c | intermediary metabolism and respiration |
| gi 15610139  | Rv3002c | intermediary metabolism and respiration |
| gi 57117044  | Rv3003c | intermediary metabolism and respiration |
| gi 15610147  | Rv3010c | intermediary metabolism and respiration |
| gi 15610165  | Rv3028c | intermediary metabolism and respiration |
| gi 15610166  | Rv3029c | intermediary metabolism and respiration |
| gi 15610182  | Rv3045  | intermediary metabolism and respiration |
| gi 15610223  | Rv3086  | intermediary metabolism and respiration |
| gi 15610285  | Rv3149  | intermediary metabolism and respiration |
| gi 15610286  | Rv3150  | intermediary metabolism and respiration |
| gi 15610351  | Rv3215  | intermediary metabolism and respiration |
| gi 15610360  | Rv3224  | intermediary metabolism and respiration |
| gi 15610363  | Rv3227  | intermediary metabolism and respiration |
| gi 15610384  | Rv3248c | intermediary metabolism and respiration |
| gi 15610391  | Rv3255c | intermediary metabolism and respiration |
| gi 15610411  | Rv3275c | intermediary metabolism and respiration |
| gi 15610412  | Rv3276c | intermediary metabolism and respiration |
| gi 15610419  | Rv3283  | intermediary metabolism and respiration |
| gi 15610438  | Rv3302c | intermediary metabolism and respiration |
| gi 57117086  | Rv3305c | intermediary metabolism and respiration |
| gi 15610454  | Rv3318  | intermediary metabolism and respiration |
| gi 448824809 | Rv3329  | intermediary metabolism and respiration |
| gi 15610475  | Rv3339c | intermediary metabolism and respiration |
| gi 15610476  | Rv3340  | intermediary metabolism and respiration |
| gi 15610492  | Rv3356c | intermediary metabolism and respiration |
| gi 15610504  | Rv3368c | intermediary metabolism and respiration |
| gi 15610525  | Rv3389c | intermediary metabolism and respiration |
| gi 15610532  | Rv3396c | intermediary metabolism and respiration |
| gi 15610537  | Rv3401  | intermediary metabolism and respiration |
| gi 15610546  | Rv3410c | intermediary metabolism and respiration |
| gi 15610568  | Rv3432c | intermediary metabolism and respiration |
| gi 15610572  | Rv3436c | intermediary metabolism and respiration |
| gi 15610656  | Rv3520c | intermediary metabolism and respiration |
| gi 15610671  | Rv3535c | intermediary metabolism and respiration |
| gi 15610684  | Rv3548c | intermediary metabolism and respiration |
| gi 57117125  | Rv3566c | intermediary metabolism and respiration |
| gi 15610704  | Rv3568c | intermediary metabolism and respiration |
| gi 15610705  | Rv3569c | intermediary metabolism and respiration |
| gi 15610706  | Rv3570c | intermediary metabolism and respiration |
| gi 15610717  | Rv3581c | intermediary metabolism and respiration |

|              |         |                                         |
|--------------|---------|-----------------------------------------|
| gi 57117131  | Rv3596c | intermediary metabolism and respiration |
| gi 15610745  | Rv3609c | intermediary metabolism and respiration |
| gi 15610764  | Rv3628  | intermediary metabolism and respiration |
| gi 57117137  | Rv3634c | intermediary metabolism and respiration |
| gi 345462027 | Rv3710  | intermediary metabolism and respiration |
| gi 15610862  | Rv3726  | intermediary metabolism and respiration |
| gi 15610913  | Rv3777  | intermediary metabolism and respiration |
| gi 15610926  | Rv3790  | intermediary metabolism and respiration |
| gi 15610927  | Rv3791  | intermediary metabolism and respiration |
| gi 15610950  | Rv3814c | intermediary metabolism and respiration |
| gi 15610974  | Rv3838c | intermediary metabolism and respiration |
| gi 15610994  | Rv3858c | intermediary metabolism and respiration |
| gi 15610995  | Rv3859c | intermediary metabolism and respiration |
| gi 15611050  | Rv3914  | intermediary metabolism and respiration |
| gi 15607261  | Rv0119  | lipid metabolism                        |
| gi 15607273  | Rv0131c | lipid metabolism                        |
| gi 15607296  | Rv0154c | lipid metabolism                        |
| gi 15607363  | Rv0222  | lipid metabolism                        |
| gi 15607372  | Rv0231  | lipid metabolism                        |
| gi 15607383  | Rv0242c | lipid metabolism                        |
| gi 15607384  | Rv0243  | lipid metabolism                        |
| gi 15607385  | Rv0244c | lipid metabolism                        |
| gi 15607411  | Rv0270  | lipid metabolism                        |
| gi 15607412  | Rv0271c | lipid metabolism                        |
| gi 15607541  | Rv0400c | lipid metabolism                        |
| gi 15607609  | Rv0468  | lipid metabolism                        |
| gi 57116735  | Rv0469  | lipid metabolism                        |
| gi 15607644  | Rv0503c | lipid metabolism                        |
| gi 15607691  | Rv0551c | lipid metabolism                        |
| gi 15607772  | Rv0632c | lipid metabolism                        |
| gi 15607782  | Rv0642c | lipid metabolism                        |
| gi 15607784  | Rv0644c | lipid metabolism                        |
| gi 57116767  | Rv0675  | lipid metabolism                        |
| gi 15607892  | Rv0752c | lipid metabolism                        |
| gi 57116786  | Rv0824c | lipid metabolism                        |
| gi 15607999  | Rv0859  | lipid metabolism                        |
| gi 15608000  | Rv0860  | lipid metabolism                        |
| gi 15608013  | Rv0873  | lipid metabolism                        |
| gi 15608045  | Rv0905  | lipid metabolism                        |
| gi 15608111  | Rv0971c | lipid metabolism                        |
| gi 15608112  | Rv0972c | lipid metabolism                        |
| gi 15608114  | Rv0974c | lipid metabolism                        |
| gi 15608210  | Rv1070c | lipid metabolism                        |
| gi 15608211  | Rv1071c | lipid metabolism                        |
| gi 15608214  | Rv1074c | lipid metabolism                        |
| gi 15608234  | Rv1094  | lipid metabolism                        |
| gi 15608283  | Rv1143  | lipid metabolism                        |
| gi 15608321  | Rv1181  | lipid metabolism                        |
| gi 15608463  | Rv1323  | lipid metabolism                        |
| gi 15608486  | Rv1346  | lipid metabolism                        |
| gi 15608490  | Rv1350  | lipid metabolism                        |
| gi 15608605  | Rv1467c | lipid metabolism                        |
| gi 15608621  | Rv1483  | lipid metabolism                        |
| gi 15608622  | Rv1484  | lipid metabolism                        |
| gi 15608630  | Rv1492  | lipid metabolism                        |
| gi 15608631  | Rv1493  | lipid metabolism                        |
| gi 15608659  | Rv1521  | lipid metabolism                        |
| gi 15608667  | Rv1529  | lipid metabolism                        |
| gi 15608682  | Rv1544  | lipid metabolism                        |
| gi 15608765  | Rv1627c | lipid metabolism                        |
| gi 15608821  | Rv1683  | lipid metabolism                        |
| gi 448824769 | Rv1925  | lipid metabolism                        |
| gi 15609139  | Rv2002  | lipid metabolism                        |
| gi 15609324  | Rv2187  | lipid metabolism                        |
| gi 15609381  | Rv2244  | lipid metabolism                        |
| gi 15609382  | Rv2245  | lipid metabolism                        |
| gi 15609521  | Rv2384  | lipid metabolism                        |
| gi 15609637  | Rv2500c | lipid metabolism                        |
| gi 15609638  | Rv2501c | lipid metabolism                        |
| gi 15609639  | Rv2502c | lipid metabolism                        |
| gi 15609640  | Rv2503c | lipid metabolism                        |
| gi 15609641  | Rv2504c | lipid metabolism                        |
| gi 15609661  | Rv2524c | lipid metabolism                        |
| gi 15609727  | Rv2590  | lipid metabolism                        |
| gi 15609816  | Rv2679  | lipid metabolism                        |
| gi 15609926  | Rv2789c | lipid metabolism                        |
| gi 15610065  | Rv2928  | lipid metabolism                        |
| gi 15610072  | Rv2935  | lipid metabolism                        |
| gi 15610077  | Rv2940c | lipid metabolism                        |
| gi 15610198  | Rv3061c | lipid metabolism                        |
| gi 15610226  | Rv3089  | lipid metabolism                        |

|              |         |                                       |
|--------------|---------|---------------------------------------|
| gi 15610275  | Rv3139  | lipid metabolism                      |
| gi 15610276  | Rv3140  | lipid metabolism                      |
| gi 15610410  | Rv3274c | lipid metabolism                      |
| gi 15610416  | Rv3280  | lipid metabolism                      |
| gi 15610421  | Rv3285  | lipid metabolism                      |
| gi 15610528  | Rv3392c | lipid metabolism                      |
| gi 15610640  | Rv3504  | lipid metabolism                      |
| gi 15610652  | Rv3516  | lipid metabolism                      |
| gi 15610692  | Rv3556c | lipid metabolism                      |
| gi 15610699  | Rv3563  | lipid metabolism                      |
| gi 15610803  | Rv3667  | lipid metabolism                      |
| gi 448824818 | Rv3720  | lipid metabolism                      |
| gi 15610897  | Rv3761c | lipid metabolism                      |
| gi 15610910  | Rv3774  | lipid metabolism                      |
| gi 15610933  | Rv3797  | lipid metabolism                      |
| gi 15610936  | Rv3800c | lipid metabolism                      |
| gi 15610937  | Rv3801c | lipid metabolism                      |
| gi 15610961  | Rv3825c | lipid metabolism                      |
| gi 15607223  | Rv0081  | regulatory proteins                   |
| gi 15607551  | Rv0410c | regulatory proteins                   |
| gi 15607716  | Rv0576  | regulatory proteins                   |
| gi 15608043  | Rv0903c | regulatory proteins                   |
| gi 15608071  | Rv0931c | regulatory proteins                   |
| gi 15608519  | Rv1379  | regulatory proteins                   |
| gi 15608542  | Rv1404  | regulatory proteins                   |
| gi 15609395  | Rv2258c | regulatory proteins                   |
| gi 15609495  | Rv2358  | regulatory proteins                   |
| gi 15609848  | Rv2711  | regulatory proteins                   |
| gi 15610056  | Rv2919c | regulatory proteins                   |
| gi 15610187  | Rv3050c | regulatory proteins                   |
| gi 15610269  | Rv3133c | regulatory proteins                   |
| gi 15610382  | Rv3246c | regulatory proteins                   |
| gi 15610719  | Rv3583c | regulatory proteins                   |
| gi 15610812  | Rv3676  | regulatory proteins                   |
| gi 15609955  | Rv2818c | unknown                               |
| gi 15607491  | Rv0350  | virulence, detoxification, adaptation |
| gi 15607492  | Rv0351  | virulence, detoxification, adaptation |
| gi 57116724  | Rv0352  | virulence, detoxification, adaptation |
| gi 15607525  | Rv0384c | virulence, detoxification, adaptation |
| gi 15607573  | Rv0432  | virulence, detoxification, adaptation |
| gi 15607581  | Rv0440  | virulence, detoxification, adaptation |
| gi 15607739  | Rv0599c | virulence, detoxification, adaptation |
| gi 15607938  | Rv0798c | virulence, detoxification, adaptation |
| gi 15608386  | Rv1246c | virulence, detoxification, adaptation |
| gi 15609038  | Rv1901  | virulence, detoxification, adaptation |
| gi 15609045  | Rv1908c | virulence, detoxification, adaptation |
| gi 15609069  | Rv1932  | virulence, detoxification, adaptation |
| gi 15609168  | Rv2031c | virulence, detoxification, adaptation |
| gi 15609240  | Rv2103c | virulence, detoxification, adaptation |
| gi 15609436  | Rv2299c | virulence, detoxification, adaptation |
| gi 15609510  | Rv2373c | virulence, detoxification, adaptation |
| gi 57116987  | Rv2416c | virulence, detoxification, adaptation |
| gi 15609565  | Rv2428  | virulence, detoxification, adaptation |
| gi 15609566  | Rv2429  | virulence, detoxification, adaptation |
| gi 15609658  | Rv2521  | virulence, detoxification, adaptation |
| gi 15609664  | Rv2527  | virulence, detoxification, adaptation |
| gi 15609718  | Rv2581c | virulence, detoxification, adaptation |
| gi 15610405  | Rv3269  | virulence, detoxification, adaptation |
| gi 15610553  | Rv3417c | virulence, detoxification, adaptation |
| gi 15610554  | Rv3418c | virulence, detoxification, adaptation |
| gi 15610784  | Rv3648c | virulence, detoxification, adaptation |
| gi 15610982  | Rv3846  | virulence, detoxification, adaptation |



**Table S7B. Complete list of M.tuberculosis proteins according to their function category.**

| Synonym | Functional category          |
|---------|------------------------------|
| Rv2920c | cell wall and cell processes |
| Rv2127  | cell wall and cell processes |
| Rv0346c | cell wall and cell processes |
| Rv1860  | cell wall and cell processes |
| Rv2684  | cell wall and cell processes |
| Rv2685  | cell wall and cell processes |
| Rv3578  | cell wall and cell processes |
| Rv2643  | cell wall and cell processes |
| Rv0917  | cell wall and cell processes |
| Rv2691  | cell wall and cell processes |
| Rv2692  | cell wall and cell processes |
| Rv2376c | cell wall and cell processes |
| Rv1984c | cell wall and cell processes |
| Rv3004  | cell wall and cell processes |
| Rv1607  | cell wall and cell processes |
| Rv1239c | cell wall and cell processes |
| Rv0806c | cell wall and cell processes |
| Rv0092  | cell wall and cell processes |
| Rv0103c | cell wall and cell processes |
| Rv3270  | cell wall and cell processes |
| Rv1469  | cell wall and cell processes |
| Rv0908  | cell wall and cell processes |
| Rv1997  | cell wall and cell processes |
| Rv1992c | cell wall and cell processes |
| Rv0425c | cell wall and cell processes |
| Rv0107c | cell wall and cell processes |
| Rv3743c | cell wall and cell processes |
| Rv0969  | cell wall and cell processes |
| Rv1758  | cell wall and cell processes |
| Rv2301  | cell wall and cell processes |
| Rv3451  | cell wall and cell processes |
| Rv3452  | cell wall and cell processes |
| Rv3724A | cell wall and cell processes |
| Rv3724B | cell wall and cell processes |
| Rv1704c | cell wall and cell processes |
| Rv2397c | cell wall and cell processes |
| Rv2399c | cell wall and cell processes |
| Rv2398c | cell wall and cell processes |
| Rv3330  | cell wall and cell processes |
| Rv2911  | cell wall and cell processes |
| Rv2443  | cell wall and cell processes |
| Rv2981c | cell wall and cell processes |
| Rv2637  | cell wall and cell processes |
| Rv3666c | cell wall and cell processes |
| Rv3665c | cell wall and cell processes |
| Rv3664c | cell wall and cell processes |
| Rv3663c | cell wall and cell processes |
| Rv2936  | cell wall and cell processes |
| Rv2937  | cell wall and cell processes |
| Rv2938  | cell wall and cell processes |
| Rv1677  | cell wall and cell processes |
| Rv2846c | cell wall and cell processes |
| Rv3794  | cell wall and cell processes |
| Rv3795  | cell wall and cell processes |
| Rv3793  | cell wall and cell processes |
| Rv0783c | cell wall and cell processes |
| Rv3875  | cell wall and cell processes |
| Rv3874  | cell wall and cell processes |
| Rv3890c | cell wall and cell processes |
| Rv3891c | cell wall and cell processes |
| Rv3904c | cell wall and cell processes |
| Rv3905c | cell wall and cell processes |
| Rv0287  | cell wall and cell processes |
| Rv0288  | cell wall and cell processes |
| Rv1037c | cell wall and cell processes |
| Rv1038c | cell wall and cell processes |
| Rv1197  | cell wall and cell processes |
| Rv1198  | cell wall and cell processes |
| Rv1792  | cell wall and cell processes |
| Rv1793  | cell wall and cell processes |
| Rv2346c | cell wall and cell processes |
| Rv2347c | cell wall and cell processes |
| Rv3017c | cell wall and cell processes |
| Rv3019c | cell wall and cell processes |
| Rv3020c | cell wall and cell processes |
| Rv3444c | cell wall and cell processes |
| Rv3445c | cell wall and cell processes |
| Rv3619c | cell wall and cell processes |

|         |                              |
|---------|------------------------------|
| Rv3620c | cell wall and cell processes |
| Rv3044  | cell wall and cell processes |
| Rv2916c | cell wall and cell processes |
| Rv3641c | cell wall and cell processes |
| Rv3102c | cell wall and cell processes |
| Rv3610c | cell wall and cell processes |
| Rv2748c | cell wall and cell processes |
| Rv2151c | cell wall and cell processes |
| Rv2154c | cell wall and cell processes |
| Rv3101c | cell wall and cell processes |
| Rv2921c | cell wall and cell processes |
| Rv2150c | cell wall and cell processes |
| Rv0522  | cell wall and cell processes |
| Rv0112  | cell wall and cell processes |
| Rv3919c | cell wall and cell processes |
| Rv3809c | cell wall and cell processes |
| Rv3782  | cell wall and cell processes |
| Rv3808c | cell wall and cell processes |
| Rv1018c | cell wall and cell processes |
| Rv0411c | cell wall and cell processes |
| Rv2564  | cell wall and cell processes |
| Rv0113  | cell wall and cell processes |
| Rv0114  | cell wall and cell processes |
| Rv0475  | cell wall and cell processes |
| Rv0115  | cell wall and cell processes |
| Rv0342  | cell wall and cell processes |
| Rv0341  | cell wall and cell processes |
| Rv0343  | cell wall and cell processes |
| Rv1029  | cell wall and cell processes |
| Rv1030  | cell wall and cell processes |
| Rv1031  | cell wall and cell processes |
| Rv1028A | cell wall and cell processes |
| Rv2965c | cell wall and cell processes |
| Rv3476c | cell wall and cell processes |
| Rv2903c | cell wall and cell processes |
| Rv1614  | cell wall and cell processes |
| Rv2543  | cell wall and cell processes |
| Rv2544  | cell wall and cell processes |
| Rv1911c | cell wall and cell processes |
| Rv1899c | cell wall and cell processes |
| Rv1881c | cell wall and cell processes |
| Rv1921c | cell wall and cell processes |
| Rv1946c | cell wall and cell processes |
| Rv3576  | cell wall and cell processes |
| Rv2046  | cell wall and cell processes |
| Rv2080  | cell wall and cell processes |
| Rv2116  | cell wall and cell processes |
| Rv2138  | cell wall and cell processes |
| Rv2171  | cell wall and cell processes |
| Rv2270  | cell wall and cell processes |
| Rv2290  | cell wall and cell processes |
| Rv2330c | cell wall and cell processes |
| Rv2341  | cell wall and cell processes |
| Rv2403c | cell wall and cell processes |
| Rv2518c | cell wall and cell processes |
| Rv1799  | cell wall and cell processes |
| Rv2784c | cell wall and cell processes |
| Rv2796c | cell wall and cell processes |
| Rv2905  | cell wall and cell processes |
| Rv2945c | cell wall and cell processes |
| Rv2999  | cell wall and cell processes |
| Rv3006  | cell wall and cell processes |
| Rv3016  | cell wall and cell processes |
| Rv3244c | cell wall and cell processes |
| Rv3298c | cell wall and cell processes |
| Rv3390  | cell wall and cell processes |
| Rv3584  | cell wall and cell processes |
| Rv3593  | cell wall and cell processes |
| Rv3623  | cell wall and cell processes |
| Rv3763  | cell wall and cell processes |
| Rv0237  | cell wall and cell processes |
| Rv0344c | cell wall and cell processes |
| Rv0399c | cell wall and cell processes |
| Rv0418  | cell wall and cell processes |
| Rv0419  | cell wall and cell processes |
| Rv0583c | cell wall and cell processes |
| Rv0604  | cell wall and cell processes |
| Rv0671  | cell wall and cell processes |
| Rv0835  | cell wall and cell processes |
| Rv0838  | cell wall and cell processes |
| Rv0847  | cell wall and cell processes |

|         |                              |
|---------|------------------------------|
| Rv1016c | cell wall and cell processes |
| Rv1022  | cell wall and cell processes |
| Rv1064c | cell wall and cell processes |
| Rv1166  | cell wall and cell processes |
| Rv1228  | cell wall and cell processes |
| Rv1235  | cell wall and cell processes |
| Rv1244  | cell wall and cell processes |
| Rv1270c | cell wall and cell processes |
| Rv1274  | cell wall and cell processes |
| Rv1275  | cell wall and cell processes |
| Rv1343c | cell wall and cell processes |
| Rv1252c | cell wall and cell processes |
| Rv1368  | cell wall and cell processes |
| Rv1411c | cell wall and cell processes |
| Rv1418  | cell wall and cell processes |
| Rv1541c | cell wall and cell processes |
| Rv1690  | cell wall and cell processes |
| Rv0173  | cell wall and cell processes |
| Rv0593  | cell wall and cell processes |
| Rv1970  | cell wall and cell processes |
| Rv3495c | cell wall and cell processes |
| Rv0179c | cell wall and cell processes |
| Rv0962c | cell wall and cell processes |
| Rv0483  | cell wall and cell processes |
| Rv1539  | cell wall and cell processes |
| Rv2790c | cell wall and cell processes |
| Rv3382c | cell wall and cell processes |
| Rv1110  | cell wall and cell processes |
| Rv3264c | cell wall and cell processes |
| Rv3625c | cell wall and cell processes |
| Rv1811  | cell wall and cell processes |
| Rv0362  | cell wall and cell processes |
| Rv0655  | cell wall and cell processes |
| Rv0402c | cell wall and cell processes |
| Rv1183  | cell wall and cell processes |
| Rv0202c | cell wall and cell processes |
| Rv1522c | cell wall and cell processes |
| Rv1145  | cell wall and cell processes |
| Rv1146  | cell wall and cell processes |
| Rv0507  | cell wall and cell processes |
| Rv0206c | cell wall and cell processes |
| Rv0450c | cell wall and cell processes |
| Rv0676c | cell wall and cell processes |
| Rv1557  | cell wall and cell processes |
| Rv2942  | cell wall and cell processes |
| Rv3823c | cell wall and cell processes |
| Rv2339  | cell wall and cell processes |
| Rv0403c | cell wall and cell processes |
| Rv0506  | cell wall and cell processes |
| Rv2198c | cell wall and cell processes |
| Rv0451c | cell wall and cell processes |
| Rv0677c | cell wall and cell processes |
| Rv3065  | cell wall and cell processes |
| Rv0924c | cell wall and cell processes |
| Rv1857  | cell wall and cell processes |
| Rv1858  | cell wall and cell processes |
| Rv1859  | cell wall and cell processes |
| Rv2878c | cell wall and cell processes |
| Rv1926c | cell wall and cell processes |
| Rv1980c | cell wall and cell processes |
| Rv2875  | cell wall and cell processes |
| Rv2873  | cell wall and cell processes |
| Rv2174  | cell wall and cell processes |
| Rv0985c | cell wall and cell processes |
| Rv0040c | cell wall and cell processes |
| Rv1315  | cell wall and cell processes |
| Rv0482  | cell wall and cell processes |
| Rv2152c | cell wall and cell processes |
| Rv2155c | cell wall and cell processes |
| Rv2158c | cell wall and cell processes |
| Rv2157c | cell wall and cell processes |
| Rv2153c | cell wall and cell processes |
| Rv1338  | cell wall and cell processes |
| Rv2156c | cell wall and cell processes |
| Rv3332  | cell wall and cell processes |
| Rv1902c | cell wall and cell processes |
| Rv2329c | cell wall and cell processes |
| Rv1737c | cell wall and cell processes |
| Rv0261c | cell wall and cell processes |
| Rv0267  | cell wall and cell processes |
| Rv2856  | cell wall and cell processes |

|         |                              |
|---------|------------------------------|
| Rv0899  | cell wall and cell processes |
| Rv1280c | cell wall and cell processes |
| Rv1283c | cell wall and cell processes |
| Rv1282c | cell wall and cell processes |
| Rv1281c | cell wall and cell processes |
| Rv3918c | cell wall and cell processes |
| Rv3917c | cell wall and cell processes |
| Rv0016c | cell wall and cell processes |
| Rv2163c | cell wall and cell processes |
| Rv0820  | cell wall and cell processes |
| Rv3301c | cell wall and cell processes |
| Rv0821c | cell wall and cell processes |
| Rv1159  | cell wall and cell processes |
| Rv3810  | cell wall and cell processes |
| Rv0545c | cell wall and cell processes |
| Rv2281  | cell wall and cell processes |
| Rv0050  | cell wall and cell processes |
| Rv3682  | cell wall and cell processes |
| Rv2051c | cell wall and cell processes |
| Rv0930  | cell wall and cell processes |
| Rv0936  | cell wall and cell processes |
| Rv0933  | cell wall and cell processes |
| Rv0935  | cell wall and cell processes |
| Rv0929  | cell wall and cell processes |
| Rv0934  | cell wall and cell processes |
| Rv0932c | cell wall and cell processes |
| Rv0928  | cell wall and cell processes |
| Rv3783  | cell wall and cell processes |
| Rv3781  | cell wall and cell processes |
| Rv1302  | cell wall and cell processes |
| Rv2869c | cell wall and cell processes |
| Rv2320c | cell wall and cell processes |
| Rv0017c | cell wall and cell processes |
| Rv0867c | cell wall and cell processes |
| Rv1009  | cell wall and cell processes |
| Rv1884c | cell wall and cell processes |
| Rv2389c | cell wall and cell processes |
| Rv2450c | cell wall and cell processes |
| Rv0007  | cell wall and cell processes |
| Rv0008c | cell wall and cell processes |
| Rv0010c | cell wall and cell processes |
| Rv0011c | cell wall and cell processes |
| Rv0012  | cell wall and cell processes |
| Rv0037c | cell wall and cell processes |
| Rv0039c | cell wall and cell processes |
| Rv0048c | cell wall and cell processes |
| Rv0051  | cell wall and cell processes |
| Rv0064  | cell wall and cell processes |
| Rv0072  | cell wall and cell processes |
| Rv0073  | cell wall and cell processes |
| Rv0076c | cell wall and cell processes |
| Rv0090  | cell wall and cell processes |
| Rv0093c | cell wall and cell processes |
| Rv0102  | cell wall and cell processes |
| Rv0110  | cell wall and cell processes |
| Rv0116c | cell wall and cell processes |
| Rv0128  | cell wall and cell processes |
| Rv0143c | cell wall and cell processes |
| Rv0175  | cell wall and cell processes |
| Rv0176  | cell wall and cell processes |
| Rv0178  | cell wall and cell processes |
| Rv0180c | cell wall and cell processes |
| Rv0188  | cell wall and cell processes |
| Rv0191  | cell wall and cell processes |
| Rv0192A | cell wall and cell processes |
| Rv0194  | cell wall and cell processes |
| Rv0199  | cell wall and cell processes |
| Rv0200  | cell wall and cell processes |
| Rv0203  | cell wall and cell processes |
| Rv0204c | cell wall and cell processes |
| Rv0205  | cell wall and cell processes |
| Rv0218  | cell wall and cell processes |
| Rv0219  | cell wall and cell processes |
| Rv0225  | cell wall and cell processes |
| Rv0226c | cell wall and cell processes |
| Rv0227c | cell wall and cell processes |
| Rv0229c | cell wall and cell processes |
| Rv0235c | cell wall and cell processes |
| Rv0236A | cell wall and cell processes |
| Rv0236c | cell wall and cell processes |
| Rv0246  | cell wall and cell processes |

|         |                              |
|---------|------------------------------|
| Rv0265c | cell wall and cell processes |
| Rv0283  | cell wall and cell processes |
| Rv0284  | cell wall and cell processes |
| Rv0290  | cell wall and cell processes |
| Rv0292  | cell wall and cell processes |
| Rv0308  | cell wall and cell processes |
| Rv0309  | cell wall and cell processes |
| Rv0314c | cell wall and cell processes |
| Rv0318c | cell wall and cell processes |
| Rv0320  | cell wall and cell processes |
| Rv0347  | cell wall and cell processes |
| Rv0359  | cell wall and cell processes |
| Rv0361  | cell wall and cell processes |
| Rv0364  | cell wall and cell processes |
| Rv0383c | cell wall and cell processes |
| Rv0394c | cell wall and cell processes |
| Rv0398c | cell wall and cell processes |
| Rv0401  | cell wall and cell processes |
| Rv0412c | cell wall and cell processes |
| Rv0420c | cell wall and cell processes |
| Rv0426c | cell wall and cell processes |
| Rv0431  | cell wall and cell processes |
| Rv0435c | cell wall and cell processes |
| Rv0446c | cell wall and cell processes |
| Rv0461  | cell wall and cell processes |
| Rv0463  | cell wall and cell processes |
| Rv0473  | cell wall and cell processes |
| Rv0476  | cell wall and cell processes |
| Rv0477  | cell wall and cell processes |
| Rv0479c | cell wall and cell processes |
| Rv0488  | cell wall and cell processes |
| Rv0497  | cell wall and cell processes |
| Rv0513  | cell wall and cell processes |
| Rv0514  | cell wall and cell processes |
| Rv0518  | cell wall and cell processes |
| Rv0519c | cell wall and cell processes |
| Rv0528  | cell wall and cell processes |
| Rv0531  | cell wall and cell processes |
| Rv0537c | cell wall and cell processes |
| Rv0538  | cell wall and cell processes |
| Rv0541c | cell wall and cell processes |
| Rv0544c | cell wall and cell processes |
| Rv0556  | cell wall and cell processes |
| Rv0559c | cell wall and cell processes |
| Rv0584  | cell wall and cell processes |
| Rv0585c | cell wall and cell processes |
| Rv0603  | cell wall and cell processes |
| Rv0615  | cell wall and cell processes |
| Rv0621  | cell wall and cell processes |
| Rv0622  | cell wall and cell processes |
| Rv0625c | cell wall and cell processes |
| Rv0633c | cell wall and cell processes |
| Rv0658c | cell wall and cell processes |
| Rv0666  | cell wall and cell processes |
| Rv0680c | cell wall and cell processes |
| Rv0686  | cell wall and cell processes |
| Rv0713  | cell wall and cell processes |
| Rv0736  | cell wall and cell processes |
| Rv0774c | cell wall and cell processes |
| Rv0779c | cell wall and cell processes |
| Rv0817c | cell wall and cell processes |
| Rv0841  | cell wall and cell processes |
| Rv0842  | cell wall and cell processes |
| Rv0849  | cell wall and cell processes |
| Rv0870c | cell wall and cell processes |
| Rv0875c | cell wall and cell processes |
| Rv0876c | cell wall and cell processes |
| Rv0879c | cell wall and cell processes |
| Rv0882  | cell wall and cell processes |
| Rv0888  | cell wall and cell processes |
| Rv0900  | cell wall and cell processes |
| Rv0901  | cell wall and cell processes |
| Rv0907  | cell wall and cell processes |
| Rv0912  | cell wall and cell processes |
| Rv0954  | cell wall and cell processes |
| Rv0955  | cell wall and cell processes |
| Rv0961  | cell wall and cell processes |
| Rv0970  | cell wall and cell processes |
| Rv0986  | cell wall and cell processes |
| Rv0987  | cell wall and cell processes |
| Rv0988  | cell wall and cell processes |

|         |                              |
|---------|------------------------------|
| Rv0996  | cell wall and cell processes |
| Rv1002c | cell wall and cell processes |
| Rv1004c | cell wall and cell processes |
| Rv1024  | cell wall and cell processes |
| Rv1072  | cell wall and cell processes |
| Rv1075c | cell wall and cell processes |
| Rv1081c | cell wall and cell processes |
| Rv1086  | cell wall and cell processes |
| Rv1087A | cell wall and cell processes |
| Rv1097c | cell wall and cell processes |
| Rv1101c | cell wall and cell processes |
| Rv1115  | cell wall and cell processes |
| Rv1132  | cell wall and cell processes |
| Rv1139c | cell wall and cell processes |
| Rv1140  | cell wall and cell processes |
| Rv1184c | cell wall and cell processes |
| Rv1200  | cell wall and cell processes |
| Rv1216c | cell wall and cell processes |
| Rv1217c | cell wall and cell processes |
| Rv1218c | cell wall and cell processes |
| Rv1226c | cell wall and cell processes |
| Rv1227c | cell wall and cell processes |
| Rv1230c | cell wall and cell processes |
| Rv1231c | cell wall and cell processes |
| Rv1233c | cell wall and cell processes |
| Rv1234  | cell wall and cell processes |
| Rv1249c | cell wall and cell processes |
| Rv1250  | cell wall and cell processes |
| Rv1258c | cell wall and cell processes |
| Rv1269c | cell wall and cell processes |
| Rv1271c | cell wall and cell processes |
| Rv1272c | cell wall and cell processes |
| Rv1273c | cell wall and cell processes |
| Rv1291c | cell wall and cell processes |
| Rv1303  | cell wall and cell processes |
| Rv1312  | cell wall and cell processes |
| Rv1337  | cell wall and cell processes |
| Rv1342c | cell wall and cell processes |
| Rv1348  | cell wall and cell processes |
| Rv1349  | cell wall and cell processes |
| Rv1362c | cell wall and cell processes |
| Rv1363c | cell wall and cell processes |
| Rv1371  | cell wall and cell processes |
| Rv1382  | cell wall and cell processes |
| Rv1401  | cell wall and cell processes |
| Rv1410c | cell wall and cell processes |
| Rv1417  | cell wall and cell processes |
| Rv1424c | cell wall and cell processes |
| Rv1431  | cell wall and cell processes |
| Rv1433  | cell wall and cell processes |
| Rv1435c | cell wall and cell processes |
| Rv1456c | cell wall and cell processes |
| Rv1457c | cell wall and cell processes |
| Rv1458c | cell wall and cell processes |
| Rv1459c | cell wall and cell processes |
| Rv1463  | cell wall and cell processes |
| Rv1473  | cell wall and cell processes |
| Rv1476  | cell wall and cell processes |
| Rv1481  | cell wall and cell processes |
| Rv1487  | cell wall and cell processes |
| Rv1488  | cell wall and cell processes |
| Rv1490  | cell wall and cell processes |
| Rv1491c | cell wall and cell processes |
| Rv1496  | cell wall and cell processes |
| Rv1508c | cell wall and cell processes |
| Rv1510  | cell wall and cell processes |
| Rv1517  | cell wall and cell processes |
| Rv1565c | cell wall and cell processes |
| Rv1567c | cell wall and cell processes |
| Rv1591  | cell wall and cell processes |
| Rv1610  | cell wall and cell processes |
| Rv1615  | cell wall and cell processes |
| Rv1616  | cell wall and cell processes |
| Rv1619  | cell wall and cell processes |
| Rv1624c | cell wall and cell processes |
| Rv1634  | cell wall and cell processes |
| Rv1635c | cell wall and cell processes |
| Rv1639c | cell wall and cell processes |
| Rv1648  | cell wall and cell processes |
| Rv1667c | cell wall and cell processes |
| Rv1668c | cell wall and cell processes |

|         |                              |
|---------|------------------------------|
| Rv1671  | cell wall and cell processes |
| Rv1672c | cell wall and cell processes |
| Rv1678  | cell wall and cell processes |
| Rv1686c | cell wall and cell processes |
| Rv1687c | cell wall and cell processes |
| Rv1707  | cell wall and cell processes |
| Rv1708  | cell wall and cell processes |
| Rv1730c | cell wall and cell processes |
| Rv1733c | cell wall and cell processes |
| Rv1735c | cell wall and cell processes |
| Rv1739c | cell wall and cell processes |
| Rv1744c | cell wall and cell processes |
| Rv1747  | cell wall and cell processes |
| Rv1749c | cell wall and cell processes |
| Rv1761c | cell wall and cell processes |
| Rv1779c | cell wall and cell processes |
| Rv1782  | cell wall and cell processes |
| Rv1783  | cell wall and cell processes |
| Rv1795  | cell wall and cell processes |
| Rv1797  | cell wall and cell processes |
| Rv1819c | cell wall and cell processes |
| Rv1824  | cell wall and cell processes |
| Rv1841c | cell wall and cell processes |
| Rv1842c | cell wall and cell processes |
| Rv1845c | cell wall and cell processes |
| Rv1861  | cell wall and cell processes |
| Rv1863c | cell wall and cell processes |
| Rv1877  | cell wall and cell processes |
| Rv1888c | cell wall and cell processes |
| Rv1892  | cell wall and cell processes |
| Rv1903  | cell wall and cell processes |
| Rv1910c | cell wall and cell processes |
| Rv1920  | cell wall and cell processes |
| Rv1922  | cell wall and cell processes |
| Rv1972  | cell wall and cell processes |
| Rv1973  | cell wall and cell processes |
| Rv1974  | cell wall and cell processes |
| Rv1979c | cell wall and cell processes |
| Rv1986  | cell wall and cell processes |
| Rv1987  | cell wall and cell processes |
| Rv1999c | cell wall and cell processes |
| Rv2025c | cell wall and cell processes |
| Rv2037c | cell wall and cell processes |
| Rv2038c | cell wall and cell processes |
| Rv2039c | cell wall and cell processes |
| Rv2040c | cell wall and cell processes |
| Rv2041c | cell wall and cell processes |
| Rv2053c | cell wall and cell processes |
| Rv2060  | cell wall and cell processes |
| Rv2075c | cell wall and cell processes |
| Rv2077c | cell wall and cell processes |
| Rv2081c | cell wall and cell processes |
| Rv2091c | cell wall and cell processes |
| Rv2113  | cell wall and cell processes |
| Rv2115c | cell wall and cell processes |
| Rv2120c | cell wall and cell processes |
| Rv2128  | cell wall and cell processes |
| Rv2136c | cell wall and cell processes |
| Rv2144c | cell wall and cell processes |
| Rv2146c | cell wall and cell processes |
| Rv2164c | cell wall and cell processes |
| Rv2169c | cell wall and cell processes |
| Rv2180c | cell wall and cell processes |
| Rv2181  | cell wall and cell processes |
| Rv2197c | cell wall and cell processes |
| Rv2199c | cell wall and cell processes |
| Rv2203  | cell wall and cell processes |
| Rv2206  | cell wall and cell processes |
| Rv2209  | cell wall and cell processes |
| Rv2219  | cell wall and cell processes |
| Rv2219A | cell wall and cell processes |
| Rv2223c | cell wall and cell processes |
| Rv2224c | cell wall and cell processes |
| Rv2235  | cell wall and cell processes |
| Rv2253  | cell wall and cell processes |
| Rv2254c | cell wall and cell processes |
| Rv2265  | cell wall and cell processes |
| Rv2272  | cell wall and cell processes |
| Rv2273  | cell wall and cell processes |
| Rv2306A | cell wall and cell processes |
| Rv2306B | cell wall and cell processes |

|         |                              |
|---------|------------------------------|
| Rv2326c | cell wall and cell processes |
| Rv2333c | cell wall and cell processes |
| Rv2345  | cell wall and cell processes |
| Rv2361c | cell wall and cell processes |
| Rv2366c | cell wall and cell processes |
| Rv2395  | cell wall and cell processes |
| Rv2401A | cell wall and cell processes |
| Rv2434c | cell wall and cell processes |
| Rv2437  | cell wall and cell processes |
| Rv2446c | cell wall and cell processes |
| Rv2456c | cell wall and cell processes |
| Rv2459  | cell wall and cell processes |
| Rv2473  | cell wall and cell processes |
| Rv2477c | cell wall and cell processes |
| Rv2507  | cell wall and cell processes |
| Rv2508c | cell wall and cell processes |
| Rv2520c | cell wall and cell processes |
| Rv2536  | cell wall and cell processes |
| Rv2553c | cell wall and cell processes |
| Rv2560  | cell wall and cell processes |
| Rv2563  | cell wall and cell processes |
| Rv2571c | cell wall and cell processes |
| Rv2575  | cell wall and cell processes |
| Rv2576c | cell wall and cell processes |
| Rv2585c | cell wall and cell processes |
| Rv2597  | cell wall and cell processes |
| Rv2599  | cell wall and cell processes |
| Rv2600  | cell wall and cell processes |
| Rv2609c | cell wall and cell processes |
| Rv2617c | cell wall and cell processes |
| Rv2620c | cell wall and cell processes |
| Rv2625c | cell wall and cell processes |
| Rv2639c | cell wall and cell processes |
| Rv2668  | cell wall and cell processes |
| Rv2673  | cell wall and cell processes |
| Rv2686c | cell wall and cell processes |
| Rv2687c | cell wall and cell processes |
| Rv2688c | cell wall and cell processes |
| Rv2690c | cell wall and cell processes |
| Rv2693c | cell wall and cell processes |
| Rv2698  | cell wall and cell processes |
| Rv2700  | cell wall and cell processes |
| Rv2709  | cell wall and cell processes |
| Rv2719c | cell wall and cell processes |
| Rv2721c | cell wall and cell processes |
| Rv2723  | cell wall and cell processes |
| Rv2729c | cell wall and cell processes |
| Rv2732c | cell wall and cell processes |
| Rv2743c | cell wall and cell processes |
| Rv2767c | cell wall and cell processes |
| Rv2772c | cell wall and cell processes |
| Rv2799  | cell wall and cell processes |
| Rv2806  | cell wall and cell processes |
| Rv2843  | cell wall and cell processes |
| Rv2864c | cell wall and cell processes |
| Rv2876  | cell wall and cell processes |
| Rv2877c | cell wall and cell processes |
| Rv2963  | cell wall and cell processes |
| Rv2968c | cell wall and cell processes |
| Rv2969c | cell wall and cell processes |
| Rv2972c | cell wall and cell processes |
| Rv2980  | cell wall and cell processes |
| Rv2994  | cell wall and cell processes |
| Rv3000  | cell wall and cell processes |
| Rv3041c | cell wall and cell processes |
| Rv3064c | cell wall and cell processes |
| Rv3069  | cell wall and cell processes |
| Rv3070  | cell wall and cell processes |
| Rv3092c | cell wall and cell processes |
| Rv3104c | cell wall and cell processes |
| Rv3162c | cell wall and cell processes |
| Rv3163c | cell wall and cell processes |
| Rv3193c | cell wall and cell processes |
| Rv3194c | cell wall and cell processes |
| Rv3197  | cell wall and cell processes |
| Rv3200c | cell wall and cell processes |
| Rv3213c | cell wall and cell processes |
| Rv3217c | cell wall and cell processes |
| Rv3236c | cell wall and cell processes |
| Rv3238c | cell wall and cell processes |
| Rv3239c | cell wall and cell processes |



|         |                              |
|---------|------------------------------|
| Rv3253c | cell wall and cell processes |
| Rv3271c | cell wall and cell processes |
| Rv3277  | cell wall and cell processes |
| Rv3278c | cell wall and cell processes |
| Rv3289c | cell wall and cell processes |
| Rv3312A | cell wall and cell processes |
| Rv3335c | cell wall and cell processes |
| Rv3346c | cell wall and cell processes |
| Rv3355c | cell wall and cell processes |
| Rv3395A | cell wall and cell processes |
| Rv3402c | cell wall and cell processes |
| Rv3434c | cell wall and cell processes |
| Rv3435c | cell wall and cell processes |
| Rv3437  | cell wall and cell processes |
| Rv3447c | cell wall and cell processes |
| Rv3448  | cell wall and cell processes |
| Rv3450c | cell wall and cell processes |
| Rv3453  | cell wall and cell processes |
| Rv3454  | cell wall and cell processes |
| Rv3479  | cell wall and cell processes |
| Rv3481c | cell wall and cell processes |
| Rv3482c | cell wall and cell processes |
| Rv3483c | cell wall and cell processes |
| Rv3524  | cell wall and cell processes |
| Rv3587c | cell wall and cell processes |
| Rv3604c | cell wall and cell processes |
| Rv3605c | cell wall and cell processes |
| Rv3629c | cell wall and cell processes |
| Rv3630  | cell wall and cell processes |
| Rv3632  | cell wall and cell processes |
| Rv3635  | cell wall and cell processes |
| Rv3645  | cell wall and cell processes |
| Rv3657c | cell wall and cell processes |
| Rv3658c | cell wall and cell processes |
| Rv3669  | cell wall and cell processes |
| Rv3675  | cell wall and cell processes |
| Rv3679  | cell wall and cell processes |
| Rv3680  | cell wall and cell processes |
| Rv3689  | cell wall and cell processes |
| Rv3690  | cell wall and cell processes |
| Rv3693  | cell wall and cell processes |
| Rv3694c | cell wall and cell processes |
| Rv3695  | cell wall and cell processes |
| Rv3723  | cell wall and cell processes |
| Rv3728  | cell wall and cell processes |
| Rv3737  | cell wall and cell processes |
| Rv3760  | cell wall and cell processes |
| Rv3779  | cell wall and cell processes |
| Rv3789  | cell wall and cell processes |
| Rv3792  | cell wall and cell processes |
| Rv3802c | cell wall and cell processes |
| Rv3805c | cell wall and cell processes |
| Rv3806c | cell wall and cell processes |
| Rv3807c | cell wall and cell processes |
| Rv3821  | cell wall and cell processes |
| Rv3835  | cell wall and cell processes |
| Rv3843c | cell wall and cell processes |
| Rv3848  | cell wall and cell processes |
| Rv3851  | cell wall and cell processes |
| Rv3857c | cell wall and cell processes |
| Rv3869  | cell wall and cell processes |
| Rv3870  | cell wall and cell processes |
| Rv3877  | cell wall and cell processes |
| Rv3882c | cell wall and cell processes |
| Rv3885c | cell wall and cell processes |
| Rv3887c | cell wall and cell processes |
| Rv3888c | cell wall and cell processes |
| Rv3894c | cell wall and cell processes |
| Rv3895c | cell wall and cell processes |
| Rv3901c | cell wall and cell processes |
| Rv3910  | cell wall and cell processes |
| Rv3921c | cell wall and cell processes |
| Rv3310  | cell wall and cell processes |
| Rv3240c | cell wall and cell processes |
| Rv1821  | cell wall and cell processes |
| Rv2587c | cell wall and cell processes |
| Rv0638  | cell wall and cell processes |
| Rv0379  | cell wall and cell processes |
| Rv2586c | cell wall and cell processes |
| Rv1440  | cell wall and cell processes |
| Rv0732  | cell wall and cell processes |

|         |                              |
|---------|------------------------------|
| Rv2922c | cell wall and cell processes |
| Rv0724  | cell wall and cell processes |
| Rv2400c | cell wall and cell processes |
| Rv1236  | cell wall and cell processes |
| Rv1237  | cell wall and cell processes |
| Rv1238  | cell wall and cell processes |
| Rv3331  | cell wall and cell processes |
| Rv2094c | cell wall and cell processes |
| Rv1224  | cell wall and cell processes |
| Rv2093c | cell wall and cell processes |
| Rv1008  | cell wall and cell processes |
| Rv3036c | cell wall and cell processes |
| Rv1174c | cell wall and cell processes |
| Rv2462c | cell wall and cell processes |
| Rv2835c | cell wall and cell processes |
| Rv2833c | cell wall and cell processes |
| Rv2832c | cell wall and cell processes |
| Rv2834c | cell wall and cell processes |
| Rv2316  | cell wall and cell processes |
| Rv2317  | cell wall and cell processes |
| Rv2318  | cell wall and cell processes |
| Rv2145c | cell wall and cell processes |
| Rv3265c | cell wall and cell processes |
| Rv2588c | cell wall and cell processes |
| Rv2287  | cell wall and cell processes |
| Rv2744c | conserved hypotheticals      |
| Rv2032  | conserved hypotheticals      |
| Rv2641  | conserved hypotheticals      |
| Rv2393  | conserved hypotheticals      |
| Rv3484  | conserved hypotheticals      |
| Rv1827  | conserved hypotheticals      |
| Rv2868c | conserved hypotheticals      |
| Rv3597c | conserved hypotheticals      |
| Rv1078  | conserved hypotheticals      |
| Rv0004  | conserved hypotheticals      |
| Rv0021c | conserved hypotheticals      |
| Rv0025  | conserved hypotheticals      |
| Rv0026  | conserved hypotheticals      |
| Rv0027  | conserved hypotheticals      |
| Rv0028  | conserved hypotheticals      |
| Rv0029  | conserved hypotheticals      |
| Rv0030  | conserved hypotheticals      |
| Rv0034  | conserved hypotheticals      |
| Rv0036c | conserved hypotheticals      |
| Rv0038  | conserved hypotheticals      |
| Rv0047c | conserved hypotheticals      |
| Rv0049  | conserved hypotheticals      |
| Rv0052  | conserved hypotheticals      |
| Rv0057  | conserved hypotheticals      |
| Rv0059  | conserved hypotheticals      |
| Rv0060  | conserved hypotheticals      |
| Rv0061  | conserved hypotheticals      |
| Rv0074  | conserved hypotheticals      |
| Rv0078A | conserved hypotheticals      |
| Rv0079  | conserved hypotheticals      |
| Rv0080  | conserved hypotheticals      |
| Rv0088  | conserved hypotheticals      |
| Rv0098  | conserved hypotheticals      |
| Rv0100  | conserved hypotheticals      |
| Rv0104  | conserved hypotheticals      |
| Rv0106  | conserved hypotheticals      |
| Rv0108c | conserved hypotheticals      |
| Rv0121c | conserved hypotheticals      |
| Rv0122  | conserved hypotheticals      |
| Rv0123  | conserved hypotheticals      |
| Rv0127  | conserved hypotheticals      |
| Rv0138  | conserved hypotheticals      |
| Rv0140  | conserved hypotheticals      |
| Rv0141c | conserved hypotheticals      |
| Rv0142  | conserved hypotheticals      |
| Rv0145  | conserved hypotheticals      |
| Rv0146  | conserved hypotheticals      |
| Rv0150c | conserved hypotheticals      |
| Rv0157A | conserved hypotheticals      |
| Rv0163  | conserved hypotheticals      |
| Rv0177  | conserved hypotheticals      |
| Rv0181c | conserved hypotheticals      |
| Rv0184  | conserved hypotheticals      |
| Rv0185  | conserved hypotheticals      |
| Rv0190  | conserved hypotheticals      |
| Rv0192  | conserved hypotheticals      |

|         |                         |
|---------|-------------------------|
| Rv0193c | conserved hypotheticals |
| Rv0201c | conserved hypotheticals |
| Rv0207c | conserved hypotheticals |
| Rv0209  | conserved hypotheticals |
| Rv0210  | conserved hypotheticals |
| Rv0221  | conserved hypotheticals |
| Rv0250c | conserved hypotheticals |
| Rv0257  | conserved hypotheticals |
| Rv0258c | conserved hypotheticals |
| Rv0259c | conserved hypotheticals |
| Rv0263c | conserved hypotheticals |
| Rv0264c | conserved hypotheticals |
| Rv0268c | conserved hypotheticals |
| Rv0269c | conserved hypotheticals |
| Rv0272c | conserved hypotheticals |
| Rv0274  | conserved hypotheticals |
| Rv0276  | conserved hypotheticals |
| Rv0281  | conserved hypotheticals |
| Rv0282  | conserved hypotheticals |
| Rv0289  | conserved hypotheticals |
| Rv0293c | conserved hypotheticals |
| Rv0295c | conserved hypotheticals |
| Rv0298  | conserved hypotheticals |
| Rv0299  | conserved hypotheticals |
| Rv0307c | conserved hypotheticals |
| Rv0310c | conserved hypotheticals |
| Rv0311  | conserved hypotheticals |
| Rv0312  | conserved hypotheticals |
| Rv0313  | conserved hypotheticals |
| Rv0323c | conserved hypotheticals |
| Rv0329c | conserved hypotheticals |
| Rv0330c | conserved hypotheticals |
| Rv0332  | conserved hypotheticals |
| Rv0333  | conserved hypotheticals |
| Rv0340  | conserved hypotheticals |
| Rv0345  | conserved hypotheticals |
| Rv0349  | conserved hypotheticals |
| Rv0356c | conserved hypotheticals |
| Rv0358  | conserved hypotheticals |
| Rv0360c | conserved hypotheticals |
| Rv0365c | conserved hypotheticals |
| Rv0366c | conserved hypotheticals |
| Rv0367c | conserved hypotheticals |
| Rv0368c | conserved hypotheticals |
| Rv0371c | conserved hypotheticals |
| Rv0372c | conserved hypotheticals |
| Rv0376c | conserved hypotheticals |
| Rv0378  | conserved hypotheticals |
| Rv0381c | conserved hypotheticals |
| Rv0387c | conserved hypotheticals |
| Rv0390  | conserved hypotheticals |
| Rv0395  | conserved hypotheticals |
| Rv0396  | conserved hypotheticals |
| Rv0406c | conserved hypotheticals |
| Rv0421c | conserved hypotheticals |
| Rv0424c | conserved hypotheticals |
| Rv0428c | conserved hypotheticals |
| Rv0430  | conserved hypotheticals |
| Rv0433  | conserved hypotheticals |
| Rv0434  | conserved hypotheticals |
| Rv0441c | conserved hypotheticals |
| Rv0443  | conserved hypotheticals |
| Rv0444c | conserved hypotheticals |
| Rv0448c | conserved hypotheticals |
| Rv0449c | conserved hypotheticals |
| Rv0454  | conserved hypotheticals |
| Rv0455c | conserved hypotheticals |
| Rv0459  | conserved hypotheticals |
| Rv0460  | conserved hypotheticals |
| Rv0464c | conserved hypotheticals |
| Rv0466  | conserved hypotheticals |
| Rv0470A | conserved hypotheticals |
| Rv0471c | conserved hypotheticals |
| Rv0481c | conserved hypotheticals |
| Rv0487  | conserved hypotheticals |
| Rv0492A | conserved hypotheticals |
| Rv0493c | conserved hypotheticals |
| Rv0495c | conserved hypotheticals |
| Rv0496  | conserved hypotheticals |
| Rv0498  | conserved hypotheticals |
| Rv0499  | conserved hypotheticals |

|         |                         |
|---------|-------------------------|
| Rv0500A | conserved hypotheticals |
| Rv0500B | conserved hypotheticals |
| Rv0502  | conserved hypotheticals |
| Rv0504c | conserved hypotheticals |
| Rv0508  | conserved hypotheticals |
| Rv0516c | conserved hypotheticals |
| Rv0523c | conserved hypotheticals |
| Rv0525  | conserved hypotheticals |
| Rv0530  | conserved hypotheticals |
| Rv0540  | conserved hypotheticals |
| Rv0543c | conserved hypotheticals |
| Rv0546c | conserved hypotheticals |
| Rv0552  | conserved hypotheticals |
| Rv0566c | conserved hypotheticals |
| Rv0569  | conserved hypotheticals |
| Rv0571c | conserved hypotheticals |
| Rv0572c | conserved hypotheticals |
| Rv0573c | conserved hypotheticals |
| Rv0574c | conserved hypotheticals |
| Rv0579  | conserved hypotheticals |
| Rv0580c | conserved hypotheticals |
| Rv0597c | conserved hypotheticals |
| Rv0607  | conserved hypotheticals |
| Rv0609A | conserved hypotheticals |
| Rv0610c | conserved hypotheticals |
| Rv0611c | conserved hypotheticals |
| Rv0612  | conserved hypotheticals |
| Rv0613c | conserved hypotheticals |
| Rv0614  | conserved hypotheticals |
| Rv0616c | conserved hypotheticals |
| Rv0628c | conserved hypotheticals |
| Rv0634A | conserved hypotheticals |
| Rv0635  | conserved hypotheticals |
| Rv0637  | conserved hypotheticals |
| Rv0647c | conserved hypotheticals |
| Rv0674  | conserved hypotheticals |
| Rv0678  | conserved hypotheticals |
| Rv0679c | conserved hypotheticals |
| Rv0689c | conserved hypotheticals |
| Rv0690c | conserved hypotheticals |
| Rv0692  | conserved hypotheticals |
| Rv0695  | conserved hypotheticals |
| Rv0698  | conserved hypotheticals |
| Rv0699  | conserved hypotheticals |
| Rv0712  | conserved hypotheticals |
| Rv0724A | conserved hypotheticals |
| Rv0725c | conserved hypotheticals |
| Rv0726c | conserved hypotheticals |
| Rv0730  | conserved hypotheticals |
| Rv0731c | conserved hypotheticals |
| Rv0738  | conserved hypotheticals |
| Rv0739  | conserved hypotheticals |
| Rv0740  | conserved hypotheticals |
| Rv0743c | conserved hypotheticals |
| Rv0745  | conserved hypotheticals |
| Rv0749A | conserved hypotheticals |
| Rv0750  | conserved hypotheticals |
| Rv0756c | conserved hypotheticals |
| Rv0759c | conserved hypotheticals |
| Rv0760c | conserved hypotheticals |
| Rv0762c | conserved hypotheticals |
| Rv0767c | conserved hypotheticals |
| Rv0775  | conserved hypotheticals |
| Rv0776c | conserved hypotheticals |
| Rv0784  | conserved hypotheticals |
| Rv0785  | conserved hypotheticals |
| Rv0786c | conserved hypotheticals |
| Rv0787  | conserved hypotheticals |
| Rv0787A | conserved hypotheticals |
| Rv0789c | conserved hypotheticals |
| Rv0790c | conserved hypotheticals |
| Rv0791c | conserved hypotheticals |
| Rv0793  | conserved hypotheticals |
| Rv0799c | conserved hypotheticals |
| Rv0801  | conserved hypotheticals |
| Rv0802c | conserved hypotheticals |
| Rv0804  | conserved hypotheticals |
| Rv0805  | conserved hypotheticals |
| Rv0807  | conserved hypotheticals |
| Rv0810c | conserved hypotheticals |
| Rv0811c | conserved hypotheticals |

|         |                         |
|---------|-------------------------|
| Rv0813c | conserved hypotheticals |
| Rv0822c | conserved hypotheticals |
| Rv0825c | conserved hypotheticals |
| Rv0826  | conserved hypotheticals |
| Rv0830  | conserved hypotheticals |
| Rv0831c | conserved hypotheticals |
| Rv0836c | conserved hypotheticals |
| Rv0837c | conserved hypotheticals |
| Rv0839  | conserved hypotheticals |
| Rv0854  | conserved hypotheticals |
| Rv0856  | conserved hypotheticals |
| Rv0857  | conserved hypotheticals |
| Rv0862c | conserved hypotheticals |
| Rv0863  | conserved hypotheticals |
| Rv0874c | conserved hypotheticals |
| Rv0877  | conserved hypotheticals |
| Rv0883c | conserved hypotheticals |
| Rv0885  | conserved hypotheticals |
| Rv0887c | conserved hypotheticals |
| Rv0893c | conserved hypotheticals |
| Rv0895  | conserved hypotheticals |
| Rv0898c | conserved hypotheticals |
| Rv0906  | conserved hypotheticals |
| Rv0909  | conserved hypotheticals |
| Rv0910  | conserved hypotheticals |
| Rv0911  | conserved hypotheticals |
| Rv0918  | conserved hypotheticals |
| Rv0919  | conserved hypotheticals |
| Rv0923c | conserved hypotheticals |
| Rv0925c | conserved hypotheticals |
| Rv0926c | conserved hypotheticals |
| Rv0937c | conserved hypotheticals |
| Rv0941c | conserved hypotheticals |
| Rv0942  | conserved hypotheticals |
| Rv0948c | conserved hypotheticals |
| Rv0950c | conserved hypotheticals |
| Rv0959  | conserved hypotheticals |
| Rv0963c | conserved hypotheticals |
| Rv0964c | conserved hypotheticals |
| Rv0965c | conserved hypotheticals |
| Rv0966c | conserved hypotheticals |
| Rv0967  | conserved hypotheticals |
| Rv0968  | conserved hypotheticals |
| Rv0976c | conserved hypotheticals |
| Rv0979c | conserved hypotheticals |
| Rv0990c | conserved hypotheticals |
| Rv0991c | conserved hypotheticals |
| Rv0992c | conserved hypotheticals |
| Rv0997  | conserved hypotheticals |
| Rv0998  | conserved hypotheticals |
| Rv0999  | conserved hypotheticals |
| Rv1000c | conserved hypotheticals |
| Rv1003  | conserved hypotheticals |
| Rv1006  | conserved hypotheticals |
| Rv1012  | conserved hypotheticals |
| Rv1021  | conserved hypotheticals |
| Rv1025  | conserved hypotheticals |
| Rv1043c | conserved hypotheticals |
| Rv1044  | conserved hypotheticals |
| Rv1045  | conserved hypotheticals |
| Rv1048c | conserved hypotheticals |
| Rv1051c | conserved hypotheticals |
| Rv1052  | conserved hypotheticals |
| Rv1053c | conserved hypotheticals |
| Rv1056  | conserved hypotheticals |
| Rv1057  | conserved hypotheticals |
| Rv1059  | conserved hypotheticals |
| Rv1060  | conserved hypotheticals |
| Rv1061  | conserved hypotheticals |
| Rv1062  | conserved hypotheticals |
| Rv1063c | conserved hypotheticals |
| Rv1065  | conserved hypotheticals |
| Rv1066  | conserved hypotheticals |
| Rv1069c | conserved hypotheticals |
| Rv1073  | conserved hypotheticals |
| Rv1083  | conserved hypotheticals |
| Rv1084  | conserved hypotheticals |
| Rv1099c | conserved hypotheticals |
| Rv1100  | conserved hypotheticals |
| Rv1109c | conserved hypotheticals |
| Rv1111c | conserved hypotheticals |

|         |                         |
|---------|-------------------------|
| Rv1112  | conserved hypotheticals |
| Rv1116  | conserved hypotheticals |
| Rv1116A | conserved hypotheticals |
| Rv1117  | conserved hypotheticals |
| Rv1118c | conserved hypotheticals |
| Rv1119c | conserved hypotheticals |
| Rv1120c | conserved hypotheticals |
| Rv1125  | conserved hypotheticals |
| Rv1126c | conserved hypotheticals |
| Rv1130  | conserved hypotheticals |
| Rv1134  | conserved hypotheticals |
| Rv1137c | conserved hypotheticals |
| Rv1147  | conserved hypotheticals |
| Rv1154c | conserved hypotheticals |
| Rv1155  | conserved hypotheticals |
| Rv1156  | conserved hypotheticals |
| Rv1157c | conserved hypotheticals |
| Rv1158c | conserved hypotheticals |
| Rv1159A | conserved hypotheticals |
| Rv1171  | conserved hypotheticals |
| Rv1176c | conserved hypotheticals |
| Rv1179c | conserved hypotheticals |
| Rv1186c | conserved hypotheticals |
| Rv1190  | conserved hypotheticals |
| Rv1191  | conserved hypotheticals |
| Rv1192  | conserved hypotheticals |
| Rv1194c | conserved hypotheticals |
| Rv1203c | conserved hypotheticals |
| Rv1204c | conserved hypotheticals |
| Rv1205  | conserved hypotheticals |
| Rv1208  | conserved hypotheticals |
| Rv1209  | conserved hypotheticals |
| Rv1211  | conserved hypotheticals |
| Rv1215c | conserved hypotheticals |
| Rv1222  | conserved hypotheticals |
| Rv1225c | conserved hypotheticals |
| Rv1232c | conserved hypotheticals |
| Rv1251c | conserved hypotheticals |
| Rv1259  | conserved hypotheticals |
| Rv1261c | conserved hypotheticals |
| Rv1262c | conserved hypotheticals |
| Rv1265  | conserved hypotheticals |
| Rv1268c | conserved hypotheticals |
| Rv1276c | conserved hypotheticals |
| Rv1277  | conserved hypotheticals |
| Rv1278  | conserved hypotheticals |
| Rv1287  | conserved hypotheticals |
| Rv1288  | conserved hypotheticals |
| Rv1289  | conserved hypotheticals |
| Rv1290A | conserved hypotheticals |
| Rv1290c | conserved hypotheticals |
| Rv1301  | conserved hypotheticals |
| Rv1314c | conserved hypotheticals |
| Rv1321  | conserved hypotheticals |
| Rv1322  | conserved hypotheticals |
| Rv1322A | conserved hypotheticals |
| Rv1330c | conserved hypotheticals |
| Rv1331  | conserved hypotheticals |
| Rv1334  | conserved hypotheticals |
| Rv1335  | conserved hypotheticals |
| Rv1339  | conserved hypotheticals |
| Rv1341  | conserved hypotheticals |
| Rv1347c | conserved hypotheticals |
| Rv1351  | conserved hypotheticals |
| Rv1352  | conserved hypotheticals |
| Rv1354c | conserved hypotheticals |
| Rv1356c | conserved hypotheticals |
| Rv1357c | conserved hypotheticals |
| Rv1364c | conserved hypotheticals |
| Rv1366  | conserved hypotheticals |
| Rv1367c | conserved hypotheticals |
| Rv1372  | conserved hypotheticals |
| Rv1374c | conserved hypotheticals |
| Rv1375  | conserved hypotheticals |
| Rv1376  | conserved hypotheticals |
| Rv1378c | conserved hypotheticals |
| Rv1413  | conserved hypotheticals |
| Rv1414  | conserved hypotheticals |
| Rv1419  | conserved hypotheticals |
| Rv1421  | conserved hypotheticals |
| Rv1422  | conserved hypotheticals |

|         |                         |
|---------|-------------------------|
| Rv1425  | conserved hypotheticals |
| Rv1428c | conserved hypotheticals |
| Rv1429  | conserved hypotheticals |
| Rv1434  | conserved hypotheticals |
| Rv1439c | conserved hypotheticals |
| Rv1443c | conserved hypotheticals |
| Rv1444c | conserved hypotheticals |
| Rv1455  | conserved hypotheticals |
| Rv1461  | conserved hypotheticals |
| Rv1462  | conserved hypotheticals |
| Rv1466  | conserved hypotheticals |
| Rv1480  | conserved hypotheticals |
| Rv1482c | conserved hypotheticals |
| Rv1486c | conserved hypotheticals |
| Rv1489  | conserved hypotheticals |
| Rv1489A | conserved hypotheticals |
| Rv1498A | conserved hypotheticals |
| Rv1499  | conserved hypotheticals |
| Rv1501  | conserved hypotheticals |
| Rv1503c | conserved hypotheticals |
| Rv1504c | conserved hypotheticals |
| Rv1505c | conserved hypotheticals |
| Rv1507c | conserved hypotheticals |
| Rv1508A | conserved hypotheticals |
| Rv1513  | conserved hypotheticals |
| Rv1514c | conserved hypotheticals |
| Rv1515c | conserved hypotheticals |
| Rv1518  | conserved hypotheticals |
| Rv1519  | conserved hypotheticals |
| Rv1531  | conserved hypotheticals |
| Rv1532c | conserved hypotheticals |
| Rv1533  | conserved hypotheticals |
| Rv1535  | conserved hypotheticals |
| Rv1540  | conserved hypotheticals |
| Rv1545  | conserved hypotheticals |
| Rv1546  | conserved hypotheticals |
| Rv1558  | conserved hypotheticals |
| Rv1571  | conserved hypotheticals |
| Rv1590  | conserved hypotheticals |
| Rv1592c | conserved hypotheticals |
| Rv1593c | conserved hypotheticals |
| Rv1597  | conserved hypotheticals |
| Rv1598c | conserved hypotheticals |
| Rv1628c | conserved hypotheticals |
| Rv1632c | conserved hypotheticals |
| Rv1637c | conserved hypotheticals |
| Rv1638A | conserved hypotheticals |
| Rv1645c | conserved hypotheticals |
| Rv1647  | conserved hypotheticals |
| Rv1669  | conserved hypotheticals |
| Rv1670  | conserved hypotheticals |
| Rv1673c | conserved hypotheticals |
| Rv1676  | conserved hypotheticals |
| Rv1680  | conserved hypotheticals |
| Rv1682  | conserved hypotheticals |
| Rv1684  | conserved hypotheticals |
| Rv1685c | conserved hypotheticals |
| Rv1691  | conserved hypotheticals |
| Rv1693  | conserved hypotheticals |
| Rv1697  | conserved hypotheticals |
| Rv1698  | conserved hypotheticals |
| Rv1706A | conserved hypotheticals |
| Rv1709  | conserved hypotheticals |
| Rv1710  | conserved hypotheticals |
| Rv1711  | conserved hypotheticals |
| Rv1716  | conserved hypotheticals |
| Rv1717  | conserved hypotheticals |
| Rv1718  | conserved hypotheticals |
| Rv1724c | conserved hypotheticals |
| Rv1725c | conserved hypotheticals |
| Rv1727  | conserved hypotheticals |
| Rv1728c | conserved hypotheticals |
| Rv1729c | conserved hypotheticals |
| Rv1732c | conserved hypotheticals |
| Rv1734c | conserved hypotheticals |
| Rv1738  | conserved hypotheticals |
| Rv1748  | conserved hypotheticals |
| Rv1752  | conserved hypotheticals |
| Rv1754c | conserved hypotheticals |
| Rv1760  | conserved hypotheticals |
| Rv1762c | conserved hypotheticals |

|         |                         |
|---------|-------------------------|
| Rv1765c | conserved hypotheticals |
| Rv1766  | conserved hypotheticals |
| Rv1767  | conserved hypotheticals |
| Rv1769  | conserved hypotheticals |
| Rv1770  | conserved hypotheticals |
| Rv1772  | conserved hypotheticals |
| Rv1775  | conserved hypotheticals |
| Rv1778c | conserved hypotheticals |
| Rv1780  | conserved hypotheticals |
| Rv1784  | conserved hypotheticals |
| Rv1794  | conserved hypotheticals |
| Rv1798  | conserved hypotheticals |
| Rv1804c | conserved hypotheticals |
| Rv1805c | conserved hypotheticals |
| Rv1810  | conserved hypotheticals |
| Rv1813c | conserved hypotheticals |
| Rv1815  | conserved hypotheticals |
| Rv1823  | conserved hypotheticals |
| Rv1825  | conserved hypotheticals |
| Rv1828  | conserved hypotheticals |
| Rv1829  | conserved hypotheticals |
| Rv1830  | conserved hypotheticals |
| Rv1831  | conserved hypotheticals |
| Rv1835c | conserved hypotheticals |
| Rv1836c | conserved hypotheticals |
| Rv1847  | conserved hypotheticals |
| Rv1864c | conserved hypotheticals |
| Rv1868  | conserved hypotheticals |
| Rv1870c | conserved hypotheticals |
| Rv1871c | conserved hypotheticals |
| Rv1873  | conserved hypotheticals |
| Rv1874  | conserved hypotheticals |
| Rv1875  | conserved hypotheticals |
| Rv1879  | conserved hypotheticals |
| Rv1883c | conserved hypotheticals |
| Rv1885c | conserved hypotheticals |
| Rv1887  | conserved hypotheticals |
| Rv1888A | conserved hypotheticals |
| Rv1889c | conserved hypotheticals |
| Rv1890c | conserved hypotheticals |
| Rv1891  | conserved hypotheticals |
| Rv1893  | conserved hypotheticals |
| Rv1894c | conserved hypotheticals |
| Rv1896c | conserved hypotheticals |
| Rv1897c | conserved hypotheticals |
| Rv1898  | conserved hypotheticals |
| Rv1904  | conserved hypotheticals |
| Rv1906c | conserved hypotheticals |
| Rv1907c | conserved hypotheticals |
| Rv1913  | conserved hypotheticals |
| Rv1914c | conserved hypotheticals |
| Rv1919c | conserved hypotheticals |
| Rv1924c | conserved hypotheticals |
| Rv1927  | conserved hypotheticals |
| Rv1929c | conserved hypotheticals |
| Rv1930c | conserved hypotheticals |
| Rv1944c | conserved hypotheticals |
| Rv1947  | conserved hypotheticals |
| Rv1948c | conserved hypotheticals |
| Rv1949c | conserved hypotheticals |
| Rv1950c | conserved hypotheticals |
| Rv1951c | conserved hypotheticals |
| Rv1954c | conserved hypotheticals |
| Rv1957  | conserved hypotheticals |
| Rv1958c | conserved hypotheticals |
| Rv1961  | conserved hypotheticals |
| Rv1975  | conserved hypotheticals |
| Rv1976c | conserved hypotheticals |
| Rv1977  | conserved hypotheticals |
| Rv1978  | conserved hypotheticals |
| Rv1989c | conserved hypotheticals |
| Rv1991c | conserved hypotheticals |
| Rv1993c | conserved hypotheticals |
| Rv1995  | conserved hypotheticals |
| Rv1996  | conserved hypotheticals |
| Rv1998c | conserved hypotheticals |
| Rv2000  | conserved hypotheticals |
| Rv2001  | conserved hypotheticals |
| Rv2003c | conserved hypotheticals |
| Rv2004c | conserved hypotheticals |
| Rv2005c | conserved hypotheticals |



|         |                         |
|---------|-------------------------|
| Rv2008c | conserved hypotheticals |
| Rv2011c | conserved hypotheticals |
| Rv2012  | conserved hypotheticals |
| Rv2015c | conserved hypotheticals |
| Rv2016  | conserved hypotheticals |
| Rv2018  | conserved hypotheticals |
| Rv2019  | conserved hypotheticals |
| Rv2020c | conserved hypotheticals |
| Rv2022c | conserved hypotheticals |
| Rv2023A | conserved hypotheticals |
| Rv2023c | conserved hypotheticals |
| Rv2024c | conserved hypotheticals |
| Rv2026c | conserved hypotheticals |
| Rv2028c | conserved hypotheticals |
| Rv2030c | conserved hypotheticals |
| Rv2033c | conserved hypotheticals |
| Rv2035  | conserved hypotheticals |
| Rv2042c | conserved hypotheticals |
| Rv2044c | conserved hypotheticals |
| Rv2047c | conserved hypotheticals |
| Rv2049c | conserved hypotheticals |
| Rv2050  | conserved hypotheticals |
| Rv2052c | conserved hypotheticals |
| Rv2054  | conserved hypotheticals |
| Rv2059  | conserved hypotheticals |
| Rv2061c | conserved hypotheticals |
| Rv2067c | conserved hypotheticals |
| Rv2074  | conserved hypotheticals |
| Rv2076c | conserved hypotheticals |
| Rv2077A | conserved hypotheticals |
| Rv2078  | conserved hypotheticals |
| Rv2079  | conserved hypotheticals |
| Rv2082  | conserved hypotheticals |
| Rv2083  | conserved hypotheticals |
| Rv2095c | conserved hypotheticals |
| Rv2096c | conserved hypotheticals |
| Rv2097c | conserved hypotheticals |
| Rv2102  | conserved hypotheticals |
| Rv2111c | conserved hypotheticals |
| Rv2112c | conserved hypotheticals |
| Rv2114  | conserved hypotheticals |
| Rv2117  | conserved hypotheticals |
| Rv2119  | conserved hypotheticals |
| Rv2125  | conserved hypotheticals |
| Rv2132  | conserved hypotheticals |
| Rv2133c | conserved hypotheticals |
| Rv2134c | conserved hypotheticals |
| Rv2135c | conserved hypotheticals |
| Rv2137c | conserved hypotheticals |
| Rv2143  | conserved hypotheticals |
| Rv2147c | conserved hypotheticals |
| Rv2148c | conserved hypotheticals |
| Rv2159c | conserved hypotheticals |
| Rv2165c | conserved hypotheticals |
| Rv2166c | conserved hypotheticals |
| Rv2170  | conserved hypotheticals |
| Rv2172c | conserved hypotheticals |
| Rv2179c | conserved hypotheticals |
| Rv2182c | conserved hypotheticals |
| Rv2183c | conserved hypotheticals |
| Rv2184c | conserved hypotheticals |
| Rv2186c | conserved hypotheticals |
| Rv2188c | conserved hypotheticals |
| Rv2189c | conserved hypotheticals |
| Rv2204c | conserved hypotheticals |
| Rv2205c | conserved hypotheticals |
| Rv2212  | conserved hypotheticals |
| Rv2216  | conserved hypotheticals |
| Rv2226  | conserved hypotheticals |
| Rv2227  | conserved hypotheticals |
| Rv2228c | conserved hypotheticals |
| Rv2229c | conserved hypotheticals |
| Rv2230c | conserved hypotheticals |
| Rv2232  | conserved hypotheticals |
| Rv2237  | conserved hypotheticals |
| Rv2239c | conserved hypotheticals |
| Rv2240c | conserved hypotheticals |
| Rv2242  | conserved hypotheticals |
| Rv2248  | conserved hypotheticals |
| Rv2252  | conserved hypotheticals |
| Rv2255c | conserved hypotheticals |

|         |                         |
|---------|-------------------------|
| Rv2256c | conserved hypotheticals |
| Rv2257c | conserved hypotheticals |
| Rv2260  | conserved hypotheticals |
| Rv2264c | conserved hypotheticals |
| Rv2267c | conserved hypotheticals |
| Rv2269c | conserved hypotheticals |
| Rv2271  | conserved hypotheticals |
| Rv2275  | conserved hypotheticals |
| Rv2283  | conserved hypotheticals |
| Rv2285  | conserved hypotheticals |
| Rv2286c | conserved hypotheticals |
| Rv2288  | conserved hypotheticals |
| Rv2293c | conserved hypotheticals |
| Rv2295  | conserved hypotheticals |
| Rv2297  | conserved hypotheticals |
| Rv2298  | conserved hypotheticals |
| Rv2300c | conserved hypotheticals |
| Rv2302  | conserved hypotheticals |
| Rv2304c | conserved hypotheticals |
| Rv2305  | conserved hypotheticals |
| Rv2307A | conserved hypotheticals |
| Rv2307B | conserved hypotheticals |
| Rv2307c | conserved hypotheticals |
| Rv2307D | conserved hypotheticals |
| Rv2308  | conserved hypotheticals |
| Rv2309A | conserved hypotheticals |
| Rv2311  | conserved hypotheticals |
| Rv2312  | conserved hypotheticals |
| Rv2313c | conserved hypotheticals |
| Rv2314c | conserved hypotheticals |
| Rv2315c | conserved hypotheticals |
| Rv2319c | conserved hypotheticals |
| Rv2323c | conserved hypotheticals |
| Rv2325c | conserved hypotheticals |
| Rv2327  | conserved hypotheticals |
| Rv2331  | conserved hypotheticals |
| Rv2331A | conserved hypotheticals |
| Rv2336  | conserved hypotheticals |
| Rv2337c | conserved hypotheticals |
| Rv2342  | conserved hypotheticals |
| Rv2360c | conserved hypotheticals |
| Rv2365c | conserved hypotheticals |
| Rv2367c | conserved hypotheticals |
| Rv2369c | conserved hypotheticals |
| Rv2370c | conserved hypotheticals |
| Rv2372c | conserved hypotheticals |
| Rv2375  | conserved hypotheticals |
| Rv2387  | conserved hypotheticals |
| Rv2390c | conserved hypotheticals |
| Rv2401  | conserved hypotheticals |
| Rv2402  | conserved hypotheticals |
| Rv2405  | conserved hypotheticals |
| Rv2406c | conserved hypotheticals |
| Rv2407  | conserved hypotheticals |
| Rv2409c | conserved hypotheticals |
| Rv2410c | conserved hypotheticals |
| Rv2411c | conserved hypotheticals |
| Rv2413c | conserved hypotheticals |
| Rv2414c | conserved hypotheticals |
| Rv2415c | conserved hypotheticals |
| Rv2417c | conserved hypotheticals |
| Rv2418c | conserved hypotheticals |
| Rv2420c | conserved hypotheticals |
| Rv2422  | conserved hypotheticals |
| Rv2423  | conserved hypotheticals |
| Rv2425c | conserved hypotheticals |
| Rv2426c | conserved hypotheticals |
| Rv2432c | conserved hypotheticals |
| Rv2433c | conserved hypotheticals |
| Rv2438A | conserved hypotheticals |
| Rv2449c | conserved hypotheticals |
| Rv2451  | conserved hypotheticals |
| Rv2452c | conserved hypotheticals |
| Rv2466c | conserved hypotheticals |
| Rv2468c | conserved hypotheticals |
| Rv2469c | conserved hypotheticals |
| Rv2472  | conserved hypotheticals |
| Rv2474c | conserved hypotheticals |
| Rv2475c | conserved hypotheticals |
| Rv2478c | conserved hypotheticals |
| Rv2481c | conserved hypotheticals |

|         |                         |
|---------|-------------------------|
| Rv2484c | conserved hypotheticals |
| Rv2489c | conserved hypotheticals |
| Rv2491  | conserved hypotheticals |
| Rv2492  | conserved hypotheticals |
| Rv2510c | conserved hypotheticals |
| Rv2513  | conserved hypotheticals |
| Rv2514c | conserved hypotheticals |
| Rv2515c | conserved hypotheticals |
| Rv2516c | conserved hypotheticals |
| Rv2517c | conserved hypotheticals |
| Rv2522c | conserved hypotheticals |
| Rv2525c | conserved hypotheticals |
| Rv2529  | conserved hypotheticals |
| Rv2532c | conserved hypotheticals |
| Rv2541  | conserved hypotheticals |
| Rv2542  | conserved hypotheticals |
| Rv2551c | conserved hypotheticals |
| Rv2554c | conserved hypotheticals |
| Rv2556c | conserved hypotheticals |
| Rv2557  | conserved hypotheticals |
| Rv2558  | conserved hypotheticals |
| Rv2559c | conserved hypotheticals |
| Rv2561  | conserved hypotheticals |
| Rv2562  | conserved hypotheticals |
| Rv2565  | conserved hypotheticals |
| Rv2566  | conserved hypotheticals |
| Rv2567  | conserved hypotheticals |
| Rv2568c | conserved hypotheticals |
| Rv2569c | conserved hypotheticals |
| Rv2570  | conserved hypotheticals |
| Rv2573  | conserved hypotheticals |
| Rv2574  | conserved hypotheticals |
| Rv2577  | conserved hypotheticals |
| Rv2578c | conserved hypotheticals |
| Rv2598  | conserved hypotheticals |
| Rv2603c | conserved hypotheticals |
| Rv2614A | conserved hypotheticals |
| Rv2616  | conserved hypotheticals |
| Rv2618  | conserved hypotheticals |
| Rv2619c | conserved hypotheticals |
| Rv2624c | conserved hypotheticals |
| Rv2626c | conserved hypotheticals |
| Rv2627c | conserved hypotheticals |
| Rv2628  | conserved hypotheticals |
| Rv2629  | conserved hypotheticals |
| Rv2630  | conserved hypotheticals |
| Rv2631  | conserved hypotheticals |
| Rv2632c | conserved hypotheticals |
| Rv2633c | conserved hypotheticals |
| Rv2635  | conserved hypotheticals |
| Rv2636  | conserved hypotheticals |
| Rv2638  | conserved hypotheticals |
| Rv2644c | conserved hypotheticals |
| Rv2660c | conserved hypotheticals |
| Rv2661c | conserved hypotheticals |
| Rv2662  | conserved hypotheticals |
| Rv2663  | conserved hypotheticals |
| Rv2664  | conserved hypotheticals |
| Rv2665  | conserved hypotheticals |
| Rv2669  | conserved hypotheticals |
| Rv2670c | conserved hypotheticals |
| Rv2674  | conserved hypotheticals |
| Rv2675c | conserved hypotheticals |
| Rv2676c | conserved hypotheticals |
| Rv2680  | conserved hypotheticals |
| Rv2681  | conserved hypotheticals |
| Rv2683  | conserved hypotheticals |
| Rv2689c | conserved hypotheticals |
| Rv2694c | conserved hypotheticals |
| Rv2695  | conserved hypotheticals |
| Rv2696c | conserved hypotheticals |
| Rv2699c | conserved hypotheticals |
| Rv2704  | conserved hypotheticals |
| Rv2705c | conserved hypotheticals |
| Rv2706c | conserved hypotheticals |
| Rv2707  | conserved hypotheticals |
| Rv2708c | conserved hypotheticals |
| Rv2712c | conserved hypotheticals |
| Rv2714  | conserved hypotheticals |
| Rv2716  | conserved hypotheticals |
| Rv2717c | conserved hypotheticals |

|         |                         |
|---------|-------------------------|
| Rv2718c | conserved hypotheticals |
| Rv2722  | conserved hypotheticals |
| Rv2728c | conserved hypotheticals |
| Rv2730  | conserved hypotheticals |
| Rv2731  | conserved hypotheticals |
| Rv2733c | conserved hypotheticals |
| Rv2734  | conserved hypotheticals |
| Rv2735c | conserved hypotheticals |
| Rv2737A | conserved hypotheticals |
| Rv2738c | conserved hypotheticals |
| Rv2742c | conserved hypotheticals |
| Rv2747  | conserved hypotheticals |
| Rv2749  | conserved hypotheticals |
| Rv2751  | conserved hypotheticals |
| Rv2752c | conserved hypotheticals |
| Rv2762c | conserved hypotheticals |
| Rv2771c | conserved hypotheticals |
| Rv2774c | conserved hypotheticals |
| Rv2775  | conserved hypotheticals |
| Rv2777c | conserved hypotheticals |
| Rv2778c | conserved hypotheticals |
| Rv2787  | conserved hypotheticals |
| Rv2794c | conserved hypotheticals |
| Rv2795c | conserved hypotheticals |
| Rv2797c | conserved hypotheticals |
| Rv2798c | conserved hypotheticals |
| Rv2802c | conserved hypotheticals |
| Rv2803  | conserved hypotheticals |
| Rv2804c | conserved hypotheticals |
| Rv2805  | conserved hypotheticals |
| Rv2807  | conserved hypotheticals |
| Rv2808  | conserved hypotheticals |
| Rv2809  | conserved hypotheticals |
| Rv2811  | conserved hypotheticals |
| Rv2813  | conserved hypotheticals |
| Rv2816c | conserved hypotheticals |
| Rv2817c | conserved hypotheticals |
| Rv2819c | conserved hypotheticals |
| Rv2820c | conserved hypotheticals |
| Rv2821c | conserved hypotheticals |
| Rv2822c | conserved hypotheticals |
| Rv2823c | conserved hypotheticals |
| Rv2824c | conserved hypotheticals |
| Rv2825c | conserved hypotheticals |
| Rv2826c | conserved hypotheticals |
| Rv2827c | conserved hypotheticals |
| Rv2828A | conserved hypotheticals |
| Rv2828c | conserved hypotheticals |
| Rv2837c | conserved hypotheticals |
| Rv2840c | conserved hypotheticals |
| Rv2842c | conserved hypotheticals |
| Rv2844  | conserved hypotheticals |
| Rv2851c | conserved hypotheticals |
| Rv2854  | conserved hypotheticals |
| Rv2862c | conserved hypotheticals |
| Rv2867c | conserved hypotheticals |
| Rv2879c | conserved hypotheticals |
| Rv2880c | conserved hypotheticals |
| Rv2891  | conserved hypotheticals |
| Rv2896c | conserved hypotheticals |
| Rv2897c | conserved hypotheticals |
| Rv2898c | conserved hypotheticals |
| Rv2901c | conserved hypotheticals |
| Rv2908c | conserved hypotheticals |
| Rv2910c | conserved hypotheticals |
| Rv2915c | conserved hypotheticals |
| Rv2917  | conserved hypotheticals |
| Rv2923c | conserved hypotheticals |
| Rv2926c | conserved hypotheticals |
| Rv2927c | conserved hypotheticals |
| Rv2929  | conserved hypotheticals |
| Rv2949c | conserved hypotheticals |
| Rv2953  | conserved hypotheticals |
| Rv2954c | conserved hypotheticals |
| Rv2955c | conserved hypotheticals |
| Rv2956  | conserved hypotheticals |
| Rv2960c | conserved hypotheticals |
| Rv2970A | conserved hypotheticals |
| Rv2974c | conserved hypotheticals |
| Rv2975c | conserved hypotheticals |
| Rv2983  | conserved hypotheticals |

|         |                         |
|---------|-------------------------|
| Rv2990c | conserved hypotheticals |
| Rv2991  | conserved hypotheticals |
| Rv2998  | conserved hypotheticals |
| Rv2998A | conserved hypotheticals |
| Rv3005c | conserved hypotheticals |
| Rv3008  | conserved hypotheticals |
| Rv3013  | conserved hypotheticals |
| Rv3015c | conserved hypotheticals |
| Rv3026c | conserved hypotheticals |
| Rv3027c | conserved hypotheticals |
| Rv3030  | conserved hypotheticals |
| Rv3031  | conserved hypotheticals |
| Rv3033  | conserved hypotheticals |
| Rv3035  | conserved hypotheticals |
| Rv3037c | conserved hypotheticals |
| Rv3038c | conserved hypotheticals |
| Rv3040c | conserved hypotheticals |
| Rv3046c | conserved hypotheticals |
| Rv3047c | conserved hypotheticals |
| Rv3054c | conserved hypotheticals |
| Rv3067  | conserved hypotheticals |
| Rv3071  | conserved hypotheticals |
| Rv3072c | conserved hypotheticals |
| Rv3073c | conserved hypotheticals |
| Rv3074  | conserved hypotheticals |
| Rv3075c | conserved hypotheticals |
| Rv3076  | conserved hypotheticals |
| Rv3079c | conserved hypotheticals |
| Rv3081  | conserved hypotheticals |
| Rv3087  | conserved hypotheticals |
| Rv3088  | conserved hypotheticals |
| Rv3090  | conserved hypotheticals |
| Rv3091  | conserved hypotheticals |
| Rv3094c | conserved hypotheticals |
| Rv3096  | conserved hypotheticals |
| Rv3098c | conserved hypotheticals |
| Rv3099c | conserved hypotheticals |
| Rv3103c | conserved hypotheticals |
| Rv3108  | conserved hypotheticals |
| Rv3114  | conserved hypotheticals |
| Rv3120  | conserved hypotheticals |
| Rv3122  | conserved hypotheticals |
| Rv3123  | conserved hypotheticals |
| Rv3126c | conserved hypotheticals |
| Rv3127  | conserved hypotheticals |
| Rv3128c | conserved hypotheticals |
| Rv3129  | conserved hypotheticals |
| Rv3131  | conserved hypotheticals |
| Rv3134c | conserved hypotheticals |
| Rv3142c | conserved hypotheticals |
| Rv3165c | conserved hypotheticals |
| Rv3166c | conserved hypotheticals |
| Rv3168  | conserved hypotheticals |
| Rv3169  | conserved hypotheticals |
| Rv3172c | conserved hypotheticals |
| Rv3178  | conserved hypotheticals |
| Rv3179  | conserved hypotheticals |
| Rv3180c | conserved hypotheticals |
| Rv3181c | conserved hypotheticals |
| Rv3182  | conserved hypotheticals |
| Rv3188  | conserved hypotheticals |
| Rv3189  | conserved hypotheticals |
| Rv3190c | conserved hypotheticals |
| Rv3192  | conserved hypotheticals |
| Rv3195  | conserved hypotheticals |
| Rv3196  | conserved hypotheticals |
| Rv3196A | conserved hypotheticals |
| Rv3205c | conserved hypotheticals |
| Rv3207c | conserved hypotheticals |
| Rv3209  | conserved hypotheticals |
| Rv3210c | conserved hypotheticals |
| Rv3212  | conserved hypotheticals |
| Rv3218  | conserved hypotheticals |
| Rv3222c | conserved hypotheticals |
| Rv3224A | conserved hypotheticals |
| Rv3224B | conserved hypotheticals |
| Rv3226c | conserved hypotheticals |
| Rv3228  | conserved hypotheticals |
| Rv3231c | conserved hypotheticals |
| Rv3233c | conserved hypotheticals |
| Rv3234c | conserved hypotheticals |

|         |                         |
|---------|-------------------------|
| Rv3235  | conserved hypotheticals |
| Rv3237c | conserved hypotheticals |
| Rv3242c | conserved hypotheticals |
| Rv3243c | conserved hypotheticals |
| Rv3254  | conserved hypotheticals |
| Rv3256c | conserved hypotheticals |
| Rv3258c | conserved hypotheticals |
| Rv3259  | conserved hypotheticals |
| Rv3267  | conserved hypotheticals |
| Rv3268  | conserved hypotheticals |
| Rv3272  | conserved hypotheticals |
| Rv3281  | conserved hypotheticals |
| Rv3282  | conserved hypotheticals |
| Rv3284  | conserved hypotheticals |
| Rv3292  | conserved hypotheticals |
| Rv3294c | conserved hypotheticals |
| Rv3300c | conserved hypotheticals |
| Rv3304  | conserved hypotheticals |
| Rv3311  | conserved hypotheticals |
| Rv3312c | conserved hypotheticals |
| Rv3333c | conserved hypotheticals |
| Rv3337  | conserved hypotheticals |
| Rv3338  | conserved hypotheticals |
| Rv3351c | conserved hypotheticals |
| Rv3353c | conserved hypotheticals |
| Rv3354  | conserved hypotheticals |
| Rv3360  | conserved hypotheticals |
| Rv3361c | conserved hypotheticals |
| Rv3362c | conserved hypotheticals |
| Rv3363c | conserved hypotheticals |
| Rv3364c | conserved hypotheticals |
| Rv3365c | conserved hypotheticals |
| Rv3369  | conserved hypotheticals |
| Rv3371  | conserved hypotheticals |
| Rv3376  | conserved hypotheticals |
| Rv3378c | conserved hypotheticals |
| Rv3394c | conserved hypotheticals |
| Rv3395c | conserved hypotheticals |
| Rv3399  | conserved hypotheticals |
| Rv3403c | conserved hypotheticals |
| Rv3404c | conserved hypotheticals |
| Rv3412  | conserved hypotheticals |
| Rv3413c | conserved hypotheticals |
| Rv3415c | conserved hypotheticals |
| Rv3421c | conserved hypotheticals |
| Rv3422c | conserved hypotheticals |
| Rv3424c | conserved hypotheticals |
| Rv3433c | conserved hypotheticals |
| Rv3438  | conserved hypotheticals |
| Rv3439c | conserved hypotheticals |
| Rv3440c | conserved hypotheticals |
| Rv3446c | conserved hypotheticals |
| Rv3463  | conserved hypotheticals |
| Rv3471c | conserved hypotheticals |
| Rv3472  | conserved hypotheticals |
| Rv3480c | conserved hypotheticals |
| Rv3486  | conserved hypotheticals |
| Rv3488  | conserved hypotheticals |
| Rv3489  | conserved hypotheticals |
| Rv3491  | conserved hypotheticals |
| Rv3492c | conserved hypotheticals |
| Rv3493c | conserved hypotheticals |
| Rv3510c | conserved hypotheticals |
| Rv3517  | conserved hypotheticals |
| Rv3519  | conserved hypotheticals |
| Rv3521  | conserved hypotheticals |
| Rv3527  | conserved hypotheticals |
| Rv3528c | conserved hypotheticals |
| Rv3529c | conserved hypotheticals |
| Rv3531c | conserved hypotheticals |
| Rv3541c | conserved hypotheticals |
| Rv3542c | conserved hypotheticals |
| Rv3547  | conserved hypotheticals |
| Rv3555c | conserved hypotheticals |
| Rv3566A | conserved hypotheticals |
| Rv3572  | conserved hypotheticals |
| Rv3577  | conserved hypotheticals |
| Rv3586  | conserved hypotheticals |
| Rv3594  | conserved hypotheticals |
| Rv3600c | conserved hypotheticals |
| Rv3603c | conserved hypotheticals |

|         |                         |
|---------|-------------------------|
| Rv3611  | conserved hypotheticals |
| Rv3612c | conserved hypotheticals |
| Rv3613c | conserved hypotheticals |
| Rv3614c | conserved hypotheticals |
| Rv3615c | conserved hypotheticals |
| Rv3616c | conserved hypotheticals |
| Rv3626c | conserved hypotheticals |
| Rv3627c | conserved hypotheticals |
| Rv3633  | conserved hypotheticals |
| Rv3639c | conserved hypotheticals |
| Rv3642c | conserved hypotheticals |
| Rv3643  | conserved hypotheticals |
| Rv3647c | conserved hypotheticals |
| Rv3651  | conserved hypotheticals |
| Rv3654c | conserved hypotheticals |
| Rv3655c | conserved hypotheticals |
| Rv3656c | conserved hypotheticals |
| Rv3659c | conserved hypotheticals |
| Rv3662c | conserved hypotheticals |
| Rv3672c | conserved hypotheticals |
| Rv3678A | conserved hypotheticals |
| Rv3678c | conserved hypotheticals |
| Rv3683  | conserved hypotheticals |
| Rv3686c | conserved hypotheticals |
| Rv3688c | conserved hypotheticals |
| Rv3691  | conserved hypotheticals |
| Rv3698  | conserved hypotheticals |
| Rv3699  | conserved hypotheticals |
| Rv3701c | conserved hypotheticals |
| Rv3702c | conserved hypotheticals |
| Rv3703c | conserved hypotheticals |
| Rv3705A | conserved hypotheticals |
| Rv3705c | conserved hypotheticals |
| Rv3706c | conserved hypotheticals |
| Rv3707c | conserved hypotheticals |
| Rv3714c | conserved hypotheticals |
| Rv3716c | conserved hypotheticals |
| Rv3717  | conserved hypotheticals |
| Rv3718c | conserved hypotheticals |
| Rv3719  | conserved hypotheticals |
| Rv3722c | conserved hypotheticals |
| Rv3730c | conserved hypotheticals |
| Rv3732  | conserved hypotheticals |
| Rv3733c | conserved hypotheticals |
| Rv3734c | conserved hypotheticals |
| Rv3735  | conserved hypotheticals |
| Rv3740c | conserved hypotheticals |
| Rv3745c | conserved hypotheticals |
| Rv3747  | conserved hypotheticals |
| Rv3748  | conserved hypotheticals |
| Rv3749c | conserved hypotheticals |
| Rv3753c | conserved hypotheticals |
| Rv3755c | conserved hypotheticals |
| Rv3766  | conserved hypotheticals |
| Rv3767c | conserved hypotheticals |
| Rv3768  | conserved hypotheticals |
| Rv3769  | conserved hypotheticals |
| Rv3770c | conserved hypotheticals |
| Rv3771c | conserved hypotheticals |
| Rv3773c | conserved hypotheticals |
| Rv3776  | conserved hypotheticals |
| Rv3780  | conserved hypotheticals |
| Rv3785  | conserved hypotheticals |
| Rv3786c | conserved hypotheticals |
| Rv3787c | conserved hypotheticals |
| Rv3788  | conserved hypotheticals |
| Rv3796  | conserved hypotheticals |
| Rv3811  | conserved hypotheticals |
| Rv3813c | conserved hypotheticals |
| Rv3818  | conserved hypotheticals |
| Rv3819  | conserved hypotheticals |
| Rv3822  | conserved hypotheticals |
| Rv3831  | conserved hypotheticals |
| Rv3832c | conserved hypotheticals |
| Rv3836  | conserved hypotheticals |
| Rv3839  | conserved hypotheticals |
| Rv3845  | conserved hypotheticals |
| Rv3847  | conserved hypotheticals |
| Rv3849  | conserved hypotheticals |
| Rv3850  | conserved hypotheticals |
| Rv3856c | conserved hypotheticals |

|         |                         |
|---------|-------------------------|
| Rv3860  | conserved hypotheticals |
| Rv3861  | conserved hypotheticals |
| Rv3863  | conserved hypotheticals |
| Rv3864  | conserved hypotheticals |
| Rv3865  | conserved hypotheticals |
| Rv3866  | conserved hypotheticals |
| Rv3867  | conserved hypotheticals |
| Rv3868  | conserved hypotheticals |
| Rv3871  | conserved hypotheticals |
| Rv3876  | conserved hypotheticals |
| Rv3878  | conserved hypotheticals |
| Rv3879c | conserved hypotheticals |
| Rv3880c | conserved hypotheticals |
| Rv3881c | conserved hypotheticals |
| Rv3884c | conserved hypotheticals |
| Rv3896c | conserved hypotheticals |
| Rv3897c | conserved hypotheticals |
| Rv3898c | conserved hypotheticals |
| Rv3899c | conserved hypotheticals |
| Rv3900c | conserved hypotheticals |
| Rv3902c | conserved hypotheticals |
| Rv3903c | conserved hypotheticals |
| Rv3906c | conserved hypotheticals |
| Rv3908  | conserved hypotheticals |
| Rv3909  | conserved hypotheticals |
| Rv3912  | conserved hypotheticals |
| Rv3916c | conserved hypotheticals |
| Rv3920c | conserved hypotheticals |
| Rv3592  | conserved hypotheticals |
| Rv1636  | conserved hypotheticals |
| Rv2185c | conserved hypotheticals |
| Rv0164  | conserved hypotheticals |
| Rv2140c | conserved hypotheticals |
| Rv0577  | conserved hypotheticals |
| Rv2623  | conserved hypotheticals |
| Rv3208A | conserved hypotheticals |
| Rv3288c | conserved hypotheticals |
| Rv1525  | conserved hypotheticals |
| Rv2149c | conserved hypotheticals |
| Rv2555c | information pathways    |
| Rv1317c | information pathways    |
| Rv1292  | information pathways    |
| Rv2572c | information pathways    |
| Rv3580c | information pathways    |
| Rv1253  | information pathways    |
| Rv0429c | information pathways    |
| Rv2836c | information pathways    |
| Rv1329c | information pathways    |
| Rv3056  | information pathways    |
| Rv1537  | information pathways    |
| Rv0001  | information pathways    |
| Rv0058  | information pathways    |
| Rv1547  | information pathways    |
| Rv3370c | information pathways    |
| Rv2343c | information pathways    |
| Rv0002  | information pathways    |
| Rv3711c | information pathways    |
| Rv3721c | information pathways    |
| Rv2534c | information pathways    |
| Rv0670  | information pathways    |
| Rv0861c | information pathways    |
| Rv1406  | information pathways    |
| Rv1407  | information pathways    |
| Rv2924c | information pathways    |
| Rv2882c | information pathways    |
| Rv0684  | information pathways    |
| Rv0120c | information pathways    |
| Rv3011c | information pathways    |
| Rv3009c | information pathways    |
| Rv3012c | information pathways    |
| Rv2992c | information pathways    |
| Rv2357c | information pathways    |
| Rv2783c | information pathways    |
| Rv1080c | information pathways    |
| Rv0006  | information pathways    |
| Rv0005  | information pathways    |
| Rv2092c | information pathways    |
| Rv2101  | information pathways    |
| Rv2580c | information pathways    |
| Rv3852  | information pathways    |
| Rv2756c | information pathways    |



|         |                      |
|---------|----------------------|
| Rv2761c | information pathways |
| Rv2755c | information pathways |
| Rv2986c | information pathways |
| Rv1536  | information pathways |
| Rv3462c | information pathways |
| Rv2839c | information pathways |
| Rv1641  | information pathways |
| Rv1010  | information pathways |
| Rv0041  | information pathways |
| Rv3296  | information pathways |
| Rv3014c | information pathways |
| Rv3062  | information pathways |
| Rv3731  | information pathways |
| Rv3598c | information pathways |
| Rv1640c | information pathways |
| Rv1007c | information pathways |
| Rv1020  | information pathways |
| Rv1388  | information pathways |
| Rv1688  | information pathways |
| Rv2528c | information pathways |
| Rv2985  | information pathways |
| Rv1160  | information pathways |
| Rv0413  | information pathways |
| Rv3589  | information pathways |
| Rv3297  | information pathways |
| Rv0233  | information pathways |
| Rv3051c | information pathways |
| Rv1981c | information pathways |
| Rv3048c | information pathways |
| Rv3053c | information pathways |
| Rv3052c | information pathways |
| Rv0570  | information pathways |
| Rv3674c | information pathways |
| Rv2841c | information pathways |
| Rv2533c | information pathways |
| Rv0639  | information pathways |
| Rv1316c | information pathways |
| Rv3907c | information pathways |
| Rv1649  | information pathways |
| Rv1650  | information pathways |
| Rv1629  | information pathways |
| Rv0009  | information pathways |
| Rv2582  | information pathways |
| Rv1299  | information pathways |
| Rv3105c | information pathways |
| Rv1402  | information pathways |
| Rv2845c | information pathways |
| Rv3232c | information pathways |
| Rv3585  | information pathways |
| Rv2838c | information pathways |
| Rv2737c | information pathways |
| Rv0630c | information pathways |
| Rv0631c | information pathways |
| Rv0629c | information pathways |
| Rv0003  | information pathways |
| Rv2973c | information pathways |
| Rv1696  | information pathways |
| Rv2362c | information pathways |
| Rv3715c | information pathways |
| Rv2736c | information pathways |
| Rv3211  | information pathways |
| Rv1297  | information pathways |
| Rv3420c | information pathways |
| Rv0995  | information pathways |
| Rv2907c | information pathways |
| Rv2925c | information pathways |
| Rv2444c | information pathways |
| Rv2902c | information pathways |
| Rv3923c | information pathways |
| Rv1340  | information pathways |
| Rv0641  | information pathways |
| Rv0704  | information pathways |
| Rv0701  | information pathways |
| Rv0702  | information pathways |
| Rv0716  | information pathways |
| Rv0719  | information pathways |
| Rv0056  | information pathways |
| Rv0651  | information pathways |
| Rv0640  | information pathways |
| Rv0652  | information pathways |
| Rv3443c | information pathways |

|         |                      |
|---------|----------------------|
| Rv0714  | information pathways |
| Rv0723  | information pathways |
| Rv0708  | information pathways |
| Rv3456c | information pathways |
| Rv0720  | information pathways |
| Rv2904c | information pathways |
| Rv1643  | information pathways |
| Rv2442c | information pathways |
| Rv0706  | information pathways |
| Rv0703  | information pathways |
| Rv0715  | information pathways |
| Rv1015c | information pathways |
| Rv2441c | information pathways |
| Rv0105c | information pathways |
| Rv2058c | information pathways |
| Rv0709  | information pathways |
| Rv0722  | information pathways |
| Rv1298  | information pathways |
| Rv0979A | information pathways |
| Rv2057c | information pathways |
| Rv3924c | information pathways |
| Rv1642  | information pathways |
| Rv3461c | information pathways |
| Rv3457c | information pathways |
| Rv0667  | information pathways |
| Rv0668  | information pathways |
| Rv1390  | information pathways |
| Rv1630  | information pathways |
| Rv2890c | information pathways |
| Rv0707  | information pathways |
| Rv3458c | information pathways |
| Rv0721  | information pathways |
| Rv0053  | information pathways |
| Rv0683  | information pathways |
| Rv0718  | information pathways |
| Rv3442c | information pathways |
| Rv0700  | information pathways |
| Rv3459c | information pathways |
| Rv0682  | information pathways |
| Rv3460c | information pathways |
| Rv0717  | information pathways |
| Rv2056c | information pathways |
| Rv2785c | information pathways |
| Rv2909c | information pathways |
| Rv0710  | information pathways |
| Rv0055  | information pathways |
| Rv2055c | information pathways |
| Rv0705  | information pathways |
| Rv2412  | information pathways |
| Rv3287c | information pathways |
| Rv1365c | information pathways |
| Rv3687c | information pathways |
| Rv2593c | information pathways |
| Rv2592c | information pathways |
| Rv2594c | information pathways |
| Rv0071  | information pathways |
| Rv0634B | information pathways |
| Rv0944  | information pathways |
| Rv1700  | information pathways |
| Rv2090  | information pathways |
| Rv2191  | information pathways |
| Rv2464c | information pathways |
| Rv3201c | information pathways |
| Rv3202c | information pathways |
| Rv3204  | information pathways |
| Rv3221A | information pathways |
| Rv3241c | information pathways |
| Rv3263  | information pathways |
| Rv3644c | information pathways |
| Rv3649  | information pathways |
| Rv3834c | information pathways |
| Rv2703  | information pathways |
| Rv2710  | information pathways |
| Rv2069  | information pathways |
| Rv3414c | information pathways |
| Rv1221  | information pathways |
| Rv3286c | information pathways |
| Rv0182c | information pathways |
| Rv3223c | information pathways |
| Rv1189  | information pathways |
| Rv3328c | information pathways |

|         |                           |
|---------|---------------------------|
| Rv0445c | information pathways      |
| Rv0735  | information pathways      |
| Rv3911  | information pathways      |
| Rv3366  | information pathways      |
| Rv0054  | information pathways      |
| Rv1210  | information pathways      |
| Rv2614c | information pathways      |
| Rv3646c | information pathways      |
| Rv2906c | information pathways      |
| Rv3024c | information pathways      |
| Rv3336c | information pathways      |
| Rv3455c | information pathways      |
| Rv2793c | information pathways      |
| Rv2889c | information pathways      |
| Rv1644  | information pathways      |
| Rv0685  | information pathways      |
| Rv1165  | information pathways      |
| Rv1689  | information pathways      |
| Rv2976c | information pathways      |
| Rv1638  | information pathways      |
| Rv1633  | information pathways      |
| Rv1420  | information pathways      |
| Rv0949  | information pathways      |
| Rv3198c | information pathways      |
| Rv2448c | information pathways      |
| Rv1108c | information pathways      |
| Rv1107c | information pathways      |
| Rv0427c | information pathways      |
| Rv0031  | insertion seqs and phages |
| Rv0094c | insertion seqs and phages |
| Rv0095c | insertion seqs and phages |
| Rv0336  | insertion seqs and phages |
| Rv0393  | insertion seqs and phages |
| Rv0397  | insertion seqs and phages |
| Rv0515  | insertion seqs and phages |
| Rv0605  | insertion seqs and phages |
| Rv0606  | insertion seqs and phages |
| Rv0741  | insertion seqs and phages |
| Rv0755A | insertion seqs and phages |
| Rv0795  | insertion seqs and phages |
| Rv0796  | insertion seqs and phages |
| Rv0797  | insertion seqs and phages |
| Rv0829  | insertion seqs and phages |
| Rv0850  | insertion seqs and phages |
| Rv0920c | insertion seqs and phages |
| Rv0921  | insertion seqs and phages |
| Rv0922  | insertion seqs and phages |
| Rv1034c | insertion seqs and phages |
| Rv1035c | insertion seqs and phages |
| Rv1036c | insertion seqs and phages |
| Rv1041c | insertion seqs and phages |
| Rv1042c | insertion seqs and phages |
| Rv1047  | insertion seqs and phages |
| Rv1054  | insertion seqs and phages |
| Rv1055  | insertion seqs and phages |
| Rv1128c | insertion seqs and phages |
| Rv1148c | insertion seqs and phages |
| Rv1149  | insertion seqs and phages |
| Rv1150  | insertion seqs and phages |
| Rv1199c | insertion seqs and phages |
| Rv1313c | insertion seqs and phages |
| Rv1369c | insertion seqs and phages |
| Rv1370c | insertion seqs and phages |
| Rv1572c | insertion seqs and phages |
| Rv1573  | insertion seqs and phages |
| Rv1574  | insertion seqs and phages |
| Rv1575  | insertion seqs and phages |
| Rv1576c | insertion seqs and phages |
| Rv1577c | insertion seqs and phages |
| Rv1578c | insertion seqs and phages |
| Rv1579c | insertion seqs and phages |
| Rv1580c | insertion seqs and phages |
| Rv1581c | insertion seqs and phages |
| Rv1582c | insertion seqs and phages |
| Rv1583c | insertion seqs and phages |
| Rv1584c | insertion seqs and phages |
| Rv1585c | insertion seqs and phages |
| Rv1586c | insertion seqs and phages |
| Rv1587c | insertion seqs and phages |
| Rv1588c | insertion seqs and phages |
| Rv1701  | insertion seqs and phages |

|         |                           |
|---------|---------------------------|
| Rv1702c | insertion seqs and phages |
| Rv1756c | insertion seqs and phages |
| Rv1757c | insertion seqs and phages |
| Rv1763  | insertion seqs and phages |
| Rv1764  | insertion seqs and phages |
| Rv1765A | insertion seqs and phages |
| Rv1945  | insertion seqs and phages |
| Rv2013  | insertion seqs and phages |
| Rv2014  | insertion seqs and phages |
| Rv2085  | insertion seqs and phages |
| Rv2086  | insertion seqs and phages |
| Rv2087  | insertion seqs and phages |
| Rv2100  | insertion seqs and phages |
| Rv2105  | insertion seqs and phages |
| Rv2106  | insertion seqs and phages |
| Rv2167c | insertion seqs and phages |
| Rv2168c | insertion seqs and phages |
| Rv2177c | insertion seqs and phages |
| Rv2278  | insertion seqs and phages |
| Rv2279  | insertion seqs and phages |
| Rv2309c | insertion seqs and phages |
| Rv2310  | insertion seqs and phages |
| Rv2354  | insertion seqs and phages |
| Rv2355  | insertion seqs and phages |
| Rv2424c | insertion seqs and phages |
| Rv2479c | insertion seqs and phages |
| Rv2480c | insertion seqs and phages |
| Rv2512c | insertion seqs and phages |
| Rv2646  | insertion seqs and phages |
| Rv2647  | insertion seqs and phages |
| Rv2648  | insertion seqs and phages |
| Rv2649  | insertion seqs and phages |
| Rv2650c | insertion seqs and phages |
| Rv2651c | insertion seqs and phages |
| Rv2652c | insertion seqs and phages |
| Rv2653c | insertion seqs and phages |
| Rv2654c | insertion seqs and phages |
| Rv2655c | insertion seqs and phages |
| Rv2656c | insertion seqs and phages |
| Rv2657c | insertion seqs and phages |
| Rv2658c | insertion seqs and phages |
| Rv2659c | insertion seqs and phages |
| Rv2666  | insertion seqs and phages |
| Rv2791c | insertion seqs and phages |
| Rv2792c | insertion seqs and phages |
| Rv2810c | insertion seqs and phages |
| Rv2812  | insertion seqs and phages |
| Rv2814c | insertion seqs and phages |
| Rv2815c | insertion seqs and phages |
| Rv2885c | insertion seqs and phages |
| Rv2886c | insertion seqs and phages |
| Rv2943  | insertion seqs and phages |
| Rv2943A | insertion seqs and phages |
| Rv2944  | insertion seqs and phages |
| Rv2961  | insertion seqs and phages |
| Rv2978c | insertion seqs and phages |
| Rv2979c | insertion seqs and phages |
| Rv3023c | insertion seqs and phages |
| Rv3115  | insertion seqs and phages |
| Rv3184  | insertion seqs and phages |
| Rv3185  | insertion seqs and phages |
| Rv3186  | insertion seqs and phages |
| Rv3187  | insertion seqs and phages |
| Rv3191c | insertion seqs and phages |
| Rv3325  | insertion seqs and phages |
| Rv3326  | insertion seqs and phages |
| Rv3327  | insertion seqs and phages |
| Rv3348  | insertion seqs and phages |
| Rv3349c | insertion seqs and phages |
| Rv3380c | insertion seqs and phages |
| Rv3381c | insertion seqs and phages |
| Rv3386  | insertion seqs and phages |
| Rv3387  | insertion seqs and phages |
| Rv3427c | insertion seqs and phages |
| Rv3428c | insertion seqs and phages |
| Rv3430c | insertion seqs and phages |
| Rv3431c | insertion seqs and phages |
| Rv3466  | insertion seqs and phages |
| Rv3467  | insertion seqs and phages |
| Rv3474  | insertion seqs and phages |
| Rv3475  | insertion seqs and phages |

|         |                                         |
|---------|-----------------------------------------|
| Rv3636  | insertion seqs and phages               |
| Rv3637  | insertion seqs and phages               |
| Rv3638  | insertion seqs and phages               |
| Rv3640c | insertion seqs and phages               |
| Rv3750c | insertion seqs and phages               |
| Rv3751  | insertion seqs and phages               |
| Rv3770A | insertion seqs and phages               |
| Rv3770B | insertion seqs and phages               |
| Rv3798  | insertion seqs and phages               |
| Rv3827c | insertion seqs and phages               |
| Rv3828c | insertion seqs and phages               |
| Rv3844  | insertion seqs and phages               |
| Rv2894c | insertion seqs and phages               |
| Rv1905c | intermediary metabolism and respiration |
| Rv1915  | intermediary metabolism and respiration |
| Rv1916  | intermediary metabolism and respiration |
| Rv2241  | intermediary metabolism and respiration |
| Rv0409  | intermediary metabolism and respiration |
| Rv1475c | intermediary metabolism and respiration |
| Rv2922A | intermediary metabolism and respiration |
| Rv3313c | intermediary metabolism and respiration |
| Rv1530  | intermediary metabolism and respiration |
| Rv1862  | intermediary metabolism and respiration |
| Rv0761c | intermediary metabolism and respiration |
| Rv3045  | intermediary metabolism and respiration |
| Rv3086  | intermediary metabolism and respiration |
| Rv0162c | intermediary metabolism and respiration |
| Rv0733  | intermediary metabolism and respiration |
| Rv2202c | intermediary metabolism and respiration |
| Rv2471  | intermediary metabolism and respiration |
| Rv2780  | intermediary metabolism and respiration |
| Rv0768  | intermediary metabolism and respiration |
| Rv2858c | intermediary metabolism and respiration |
| Rv3423c | intermediary metabolism and respiration |
| Rv3305c | intermediary metabolism and respiration |
| Rv2363  | intermediary metabolism and respiration |
| Rv3306c | intermediary metabolism and respiration |
| Rv1263  | intermediary metabolism and respiration |
| Rv2888c | intermediary metabolism and respiration |
| Rv3375  | intermediary metabolism and respiration |
| Rv1538c | intermediary metabolism and respiration |
| Rv3170  | intermediary metabolism and respiration |
| Rv2584c | intermediary metabolism and respiration |
| Rv1001  | intermediary metabolism and respiration |
| Rv1654  | intermediary metabolism and respiration |
| Rv1652  | intermediary metabolism and respiration |
| Rv1655  | intermediary metabolism and respiration |
| Rv1656  | intermediary metabolism and respiration |
| Rv1658  | intermediary metabolism and respiration |
| Rv1659  | intermediary metabolism and respiration |
| Rv1653  | intermediary metabolism and respiration |
| Rv3227  | intermediary metabolism and respiration |
| Rv2538c | intermediary metabolism and respiration |
| Rv2537c | intermediary metabolism and respiration |
| Rv2552c | intermediary metabolism and respiration |
| Rv2540c | intermediary metabolism and respiration |
| Rv2178c | intermediary metabolism and respiration |
| Rv2539c | intermediary metabolism and respiration |
| Rv3708c | intermediary metabolism and respiration |
| Rv3709c | intermediary metabolism and respiration |
| Rv2201  | intermediary metabolism and respiration |
| Rv3565  | intermediary metabolism and respiration |
| Rv0337c | intermediary metabolism and respiration |
| Rv1308  | intermediary metabolism and respiration |
| Rv1304  | intermediary metabolism and respiration |
| Rv1311  | intermediary metabolism and respiration |
| Rv1310  | intermediary metabolism and respiration |
| Rv1305  | intermediary metabolism and respiration |
| Rv1306  | intermediary metabolism and respiration |
| Rv1309  | intermediary metabolism and respiration |
| Rv1307  | intermediary metabolism and respiration |
| Rv0711  | intermediary metabolism and respiration |
| Rv3299c | intermediary metabolism and respiration |
| Rv0663  | intermediary metabolism and respiration |
| Rv1876  | intermediary metabolism and respiration |
| Rv3841  | intermediary metabolism and respiration |
| Rv0186  | intermediary metabolism and respiration |
| Rv1568  | intermediary metabolism and respiration |
| Rv1589  | intermediary metabolism and respiration |
| Rv1570  | intermediary metabolism and respiration |
| Rv1569  | intermediary metabolism and respiration |

|         |                                         |
|---------|-----------------------------------------|
| Rv0032  | intermediary metabolism and respiration |
| Rv3279c | intermediary metabolism and respiration |
| Rv1442  | intermediary metabolism and respiration |
| Rv2068c | intermediary metabolism and respiration |
| Rv1284  | intermediary metabolism and respiration |
| Rv3588c | intermediary metabolism and respiration |
| Rv1383  | intermediary metabolism and respiration |
| Rv1384  | intermediary metabolism and respiration |
| Rv1077  | intermediary metabolism and respiration |
| Rv0527  | intermediary metabolism and respiration |
| Rv0529  | intermediary metabolism and respiration |
| Rv3315c | intermediary metabolism and respiration |
| Rv0062  | intermediary metabolism and respiration |
| Rv1089A | intermediary metabolism and respiration |
| Rv1090  | intermediary metabolism and respiration |
| Rv0889c | intermediary metabolism and respiration |
| Rv2498c | intermediary metabolism and respiration |
| Rv3596c | intermediary metabolism and respiration |
| Rv2667  | intermediary metabolism and respiration |
| Rv2461c | intermediary metabolism and respiration |
| Rv2460c | intermediary metabolism and respiration |
| Rv2457c | intermediary metabolism and respiration |
| Rv1712  | intermediary metabolism and respiration |
| Rv1092c | intermediary metabolism and respiration |
| Rv1631  | intermediary metabolism and respiration |
| Rv2848c | intermediary metabolism and respiration |
| Rv2231c | intermediary metabolism and respiration |
| Rv2236c | intermediary metabolism and respiration |
| Rv2064  | intermediary metabolism and respiration |
| Rv2065  | intermediary metabolism and respiration |
| Rv2066  | intermediary metabolism and respiration |
| Rv2070c | intermediary metabolism and respiration |
| Rv2072c | intermediary metabolism and respiration |
| Rv2071c | intermediary metabolism and respiration |
| Rv2062c | intermediary metabolism and respiration |
| Rv2849c | intermediary metabolism and respiration |
| Rv0255c | intermediary metabolism and respiration |
| Rv3713  | intermediary metabolism and respiration |
| Rv2208  | intermediary metabolism and respiration |
| Rv2207  | intermediary metabolism and respiration |
| Rv0254c | intermediary metabolism and respiration |
| Rv1464  | intermediary metabolism and respiration |
| Rv1451  | intermediary metabolism and respiration |
| Rv2200c | intermediary metabolism and respiration |
| Rv3043c | intermediary metabolism and respiration |
| Rv2193  | intermediary metabolism and respiration |
| Rv1625c | intermediary metabolism and respiration |
| Rv1623c | intermediary metabolism and respiration |
| Rv1622c | intermediary metabolism and respiration |
| Rv1620c | intermediary metabolism and respiration |
| Rv1621c | intermediary metabolism and respiration |
| Rv2276  | intermediary metabolism and respiration |
| Rv0766c | intermediary metabolism and respiration |
| Rv2266  | intermediary metabolism and respiration |
| Rv3545c | intermediary metabolism and respiration |
| Rv0778  | intermediary metabolism and respiration |
| Rv2268c | intermediary metabolism and respiration |
| Rv1256c | intermediary metabolism and respiration |
| Rv1394c | intermediary metabolism and respiration |
| Rv0327c | intermediary metabolism and respiration |
| Rv0568  | intermediary metabolism and respiration |
| Rv3059  | intermediary metabolism and respiration |
| Rv3685c | intermediary metabolism and respiration |
| Rv0136  | intermediary metabolism and respiration |
| Rv1666c | intermediary metabolism and respiration |
| Rv1880c | intermediary metabolism and respiration |
| Rv3121  | intermediary metabolism and respiration |
| Rv3518c | intermediary metabolism and respiration |
| Rv1785c | intermediary metabolism and respiration |
| Rv1777  | intermediary metabolism and respiration |
| Rv0764c | intermediary metabolism and respiration |
| Rv0815c | intermediary metabolism and respiration |
| Rv3117  | intermediary metabolism and respiration |
| Rv1285  | intermediary metabolism and respiration |
| Rv2335  | intermediary metabolism and respiration |
| Rv2847c | intermediary metabolism and respiration |
| Rv2392  | intermediary metabolism and respiration |
| Rv2334  | intermediary metabolism and respiration |
| Rv0848  | intermediary metabolism and respiration |
| Rv1336  | intermediary metabolism and respiration |
| Rv1286  | intermediary metabolism and respiration |

|         |                                         |
|---------|-----------------------------------------|
| Rv2131c | intermediary metabolism and respiration |
| Rv2753c | intermediary metabolism and respiration |
| Rv2773c | intermediary metabolism and respiration |
| Rv1202  | intermediary metabolism and respiration |
| Rv2726c | intermediary metabolism and respiration |
| Rv0321  | intermediary metabolism and respiration |
| Rv3314c | intermediary metabolism and respiration |
| Rv0478  | intermediary metabolism and respiration |
| Rv3307  | intermediary metabolism and respiration |
| Rv1445c | intermediary metabolism and respiration |
| Rv1391  | intermediary metabolism and respiration |
| Rv2763c | intermediary metabolism and respiration |
| Rv2344c | intermediary metabolism and respiration |
| Rv2579  | intermediary metabolism and respiration |
| Rv2874  | intermediary metabolism and respiration |
| Rv2215  | intermediary metabolism and respiration |
| Rv2697c | intermediary metabolism and respiration |
| Rv2870c | intermediary metabolism and respiration |
| Rv2682c | intermediary metabolism and respiration |
| Rv3379c | intermediary metabolism and respiration |
| Rv1713  | intermediary metabolism and respiration |
| Rv1023  | intermediary metabolism and respiration |
| Rv3215  | intermediary metabolism and respiration |
| Rv1512  | intermediary metabolism and respiration |
| Rv2364c | intermediary metabolism and respiration |
| Rv3854c | intermediary metabolism and respiration |
| Rv0363c | intermediary metabolism and respiration |
| Rv3261  | intermediary metabolism and respiration |
| Rv3262  | intermediary metabolism and respiration |
| Rv1173  | intermediary metabolism and respiration |
| Rv2899c | intermediary metabolism and respiration |
| Rv2900c | intermediary metabolism and respiration |
| Rv2007c | intermediary metabolism and respiration |
| Rv3554  | intermediary metabolism and respiration |
| Rv1177  | intermediary metabolism and respiration |
| Rv3503c | intermediary metabolism and respiration |
| Rv0407  | intermediary metabolism and respiration |
| Rv0132c | intermediary metabolism and respiration |
| Rv3029c | intermediary metabolism and respiration |
| Rv3028c | intermediary metabolism and respiration |
| Rv3607c | intermediary metabolism and respiration |
| Rv2447c | intermediary metabolism and respiration |
| Rv3356c | intermediary metabolism and respiration |
| Rv3609c | intermediary metabolism and respiration |
| Rv3606c | intermediary metabolism and respiration |
| Rv3608c | intermediary metabolism and respiration |
| Rv1207  | intermediary metabolism and respiration |
| Rv3106  | intermediary metabolism and respiration |
| Rv0886  | intermediary metabolism and respiration |
| Rv1552  | intermediary metabolism and respiration |
| Rv1553  | intermediary metabolism and respiration |
| Rv1554  | intermediary metabolism and respiration |
| Rv1555  | intermediary metabolism and respiration |
| Rv0727c | intermediary metabolism and respiration |
| Rv1098c | intermediary metabolism and respiration |
| Rv0234c | intermediary metabolism and respiration |
| Rv1731  | intermediary metabolism and respiration |
| Rv2589  | intermediary metabolism and respiration |
| Rv3432c | intermediary metabolism and respiration |
| Rv3634c | intermediary metabolism and respiration |
| Rv0501  | intermediary metabolism and respiration |
| Rv0536  | intermediary metabolism and respiration |
| Rv0620  | intermediary metabolism and respiration |
| Rv0618  | intermediary metabolism and respiration |
| Rv0619  | intermediary metabolism and respiration |
| Rv0993  | intermediary metabolism and respiration |
| Rv1436  | intermediary metabolism and respiration |
| Rv3419c | intermediary metabolism and respiration |
| Rv1832  | intermediary metabolism and respiration |
| Rv1826  | intermediary metabolism and respiration |
| Rv2211c | intermediary metabolism and respiration |
| Rv2476c | intermediary metabolism and respiration |
| Rv0773c | intermediary metabolism and respiration |
| Rv2394  | intermediary metabolism and respiration |
| Rv1542c | intermediary metabolism and respiration |
| Rv2470  | intermediary metabolism and respiration |
| Rv1837c | intermediary metabolism and respiration |
| Rv1326c | intermediary metabolism and respiration |
| Rv1213  | intermediary metabolism and respiration |
| Rv1327c | intermediary metabolism and respiration |
| Rv1328  | intermediary metabolism and respiration |

|         |                                         |
|---------|-----------------------------------------|
| Rv3436c | intermediary metabolism and respiration |
| Rv2220  | intermediary metabolism and respiration |
| Rv2222c | intermediary metabolism and respiration |
| Rv1878  | intermediary metabolism and respiration |
| Rv2860c | intermediary metabolism and respiration |
| Rv2918c | intermediary metabolism and respiration |
| Rv2221c | intermediary metabolism and respiration |
| Rv2249c | intermediary metabolism and respiration |
| Rv3302c | intermediary metabolism and respiration |
| Rv3696c | intermediary metabolism and respiration |
| Rv3842c | intermediary metabolism and respiration |
| Rv0317c | intermediary metabolism and respiration |
| Rv1093  | intermediary metabolism and respiration |
| Rv0896  | intermediary metabolism and respiration |
| Rv3859c | intermediary metabolism and respiration |
| Rv3858c | intermediary metabolism and respiration |
| Rv1093  | intermediary metabolism and respiration |
| Rv0070c | intermediary metabolism and respiration |
| Rv1511  | intermediary metabolism and respiration |
| Rv1389  | intermediary metabolism and respiration |
| Rv1844c | intermediary metabolism and respiration |
| Rv1122  | intermediary metabolism and respiration |
| Rv0489  | intermediary metabolism and respiration |
| Rv3214  | intermediary metabolism and respiration |
| Rv0562  | intermediary metabolism and respiration |
| Rv0989c | intermediary metabolism and respiration |
| Rv3704c | intermediary metabolism and respiration |
| Rv3396c | intermediary metabolism and respiration |
| Rv1843c | intermediary metabolism and respiration |
| Rv3411c | intermediary metabolism and respiration |
| Rv3410c | intermediary metabolism and respiration |
| Rv3078  | intermediary metabolism and respiration |
| Rv0509  | intermediary metabolism and respiration |
| Rv0512  | intermediary metabolism and respiration |
| Rv0510  | intermediary metabolism and respiration |
| Rv0511  | intermediary metabolism and respiration |
| Rv2678c | intermediary metabolism and respiration |
| Rv1300  | intermediary metabolism and respiration |
| Rv0524  | intermediary metabolism and respiration |
| Rv2388c | intermediary metabolism and respiration |
| Rv2677c | intermediary metabolism and respiration |
| Rv1485  | intermediary metabolism and respiration |
| Rv2725c | intermediary metabolism and respiration |
| Rv1603  | intermediary metabolism and respiration |
| Rv1601  | intermediary metabolism and respiration |
| Rv1600  | intermediary metabolism and respiration |
| Rv3772  | intermediary metabolism and respiration |
| Rv1599  | intermediary metabolism and respiration |
| Rv2122c | intermediary metabolism and respiration |
| Rv1605  | intermediary metabolism and respiration |
| Rv2121c | intermediary metabolism and respiration |
| Rv1602  | intermediary metabolism and respiration |
| Rv1606  | intermediary metabolism and respiration |
| Rv3571  | intermediary metabolism and respiration |
| Rv3624c | intermediary metabolism and respiration |
| Rv3570c | intermediary metabolism and respiration |
| Rv3567c | intermediary metabolism and respiration |
| Rv3568c | intermediary metabolism and respiration |
| Rv3569c | intermediary metabolism and respiration |
| Rv3536c | intermediary metabolism and respiration |
| Rv3534c | intermediary metabolism and respiration |
| Rv3535c | intermediary metabolism and respiration |
| Rv0130  | intermediary metabolism and respiration |
| Rv1223  | intermediary metabolism and respiration |
| Rv0084  | intermediary metabolism and respiration |
| Rv0087  | intermediary metabolism and respiration |
| Rv0085  | intermediary metabolism and respiration |
| Rv0086  | intermediary metabolism and respiration |
| Rv3339c | intermediary metabolism and respiration |
| Rv0066c | intermediary metabolism and respiration |
| Rv0467  | intermediary metabolism and respiration |
| Rv1745c | intermediary metabolism and respiration |
| Rv1559  | intermediary metabolism and respiration |
| Rv3003c | intermediary metabolism and respiration |
| Rv3470c | intermediary metabolism and respiration |
| Rv3001c | intermediary metabolism and respiration |
| Rv0189c | intermediary metabolism and respiration |
| Rv2210c | intermediary metabolism and respiration |
| Rv1820  | intermediary metabolism and respiration |
| Rv3002c | intermediary metabolism and respiration |
| Rv3509c | intermediary metabolism and respiration |



|         |                                         |
|---------|-----------------------------------------|
| Rv1604  | intermediary metabolism and respiration |
| Rv0046c | intermediary metabolism and respiration |
| Rv3025c | intermediary metabolism and respiration |
| Rv3582c | intermediary metabolism and respiration |
| Rv1011  | intermediary metabolism and respiration |
| Rv3581c | intermediary metabolism and respiration |
| Rv3393  | intermediary metabolism and respiration |
| Rv3476c | intermediary metabolism and respiration |
| Rv3537  | intermediary metabolism and respiration |
| Rv3290c | intermediary metabolism and respiration |
| Rv2404c | intermediary metabolism and respiration |
| Rv3710  | intermediary metabolism and respiration |
| Rv2995c | intermediary metabolism and respiration |
| Rv2988c | intermediary metabolism and respiration |
| Rv2987c | intermediary metabolism and respiration |
| Rv2218  | intermediary metabolism and respiration |
| Rv2217  | intermediary metabolism and respiration |
| Rv0220  | intermediary metabolism and respiration |
| Rv1923  | intermediary metabolism and respiration |
| Rv3775  | intermediary metabolism and respiration |
| Rv3487c | intermediary metabolism and respiration |
| Rv0646c | intermediary metabolism and respiration |
| Rv1399c | intermediary metabolism and respiration |
| Rv1400c | intermediary metabolism and respiration |
| Rv1900c | intermediary metabolism and respiration |
| Rv1497  | intermediary metabolism and respiration |
| Rv2284  | intermediary metabolism and respiration |
| Rv2970c | intermediary metabolism and respiration |
| Rv1426c | intermediary metabolism and respiration |
| Rv2463  | intermediary metabolism and respiration |
| Rv2485c | intermediary metabolism and respiration |
| Rv3084  | intermediary metabolism and respiration |
| Rv2045c | intermediary metabolism and respiration |
| Rv1076  | intermediary metabolism and respiration |
| Rv3203  | intermediary metabolism and respiration |
| Rv0217c | intermediary metabolism and respiration |
| Rv1834  | intermediary metabolism and respiration |
| Rv0694  | intermediary metabolism and respiration |
| Rv1872c | intermediary metabolism and respiration |
| Rv3303c | intermediary metabolism and respiration |
| Rv0462  | intermediary metabolism and respiration |
| Rv1293  | intermediary metabolism and respiration |
| Rv1781c | intermediary metabolism and respiration |
| Rv3255c | intermediary metabolism and respiration |
| Rv0734  | intermediary metabolism and respiration |
| Rv2861c | intermediary metabolism and respiration |
| Rv1240  | intermediary metabolism and respiration |
| Rv0534c | intermediary metabolism and respiration |
| Rv0548c | intermediary metabolism and respiration |
| Rv0553  | intermediary metabolism and respiration |
| Rv0555  | intermediary metabolism and respiration |
| Rv0542c | intermediary metabolism and respiration |
| Rv0558  | intermediary metabolism and respiration |
| Rv3341  | intermediary metabolism and respiration |
| Rv1079  | intermediary metabolism and respiration |
| Rv3340  | intermediary metabolism and respiration |
| Rv1133c | intermediary metabolism and respiration |
| Rv2124c | intermediary metabolism and respiration |
| Rv1392  | intermediary metabolism and respiration |
| Rv0391  | intermediary metabolism and respiration |
| Rv2332  | intermediary metabolism and respiration |
| Rv3469c | intermediary metabolism and respiration |
| Rv2727c | intermediary metabolism and respiration |
| Rv0753c | intermediary metabolism and respiration |
| Rv0751c | intermediary metabolism and respiration |
| Rv2458  | intermediary metabolism and respiration |
| Rv3109  | intermediary metabolism and respiration |
| Rv0869c | intermediary metabolism and respiration |
| Rv3110  | intermediary metabolism and respiration |
| Rv0984  | intermediary metabolism and respiration |
| Rv3111  | intermediary metabolism and respiration |
| Rv0864  | intermediary metabolism and respiration |
| Rv3324c | intermediary metabolism and respiration |
| Rv3112  | intermediary metabolism and respiration |
| Rv0868c | intermediary metabolism and respiration |
| Rv3119  | intermediary metabolism and respiration |
| Rv0866  | intermediary metabolism and respiration |
| Rv3323c | intermediary metabolism and respiration |
| Rv2453c | intermediary metabolism and respiration |
| Rv0994  | intermediary metabolism and respiration |
| Rv0438c | intermediary metabolism and respiration |

|         |                                         |
|---------|-----------------------------------------|
| Rv3206c | intermediary metabolism and respiration |
| Rv3116  | intermediary metabolism and respiration |
| Rv2338c | intermediary metabolism and respiration |
| Rv1681  | intermediary metabolism and respiration |
| Rv1355c | intermediary metabolism and respiration |
| Rv0865  | intermediary metabolism and respiration |
| Rv2852c | intermediary metabolism and respiration |
| Rv1229c | intermediary metabolism and respiration |
| Rv3441c | intermediary metabolism and respiration |
| Rv2259  | intermediary metabolism and respiration |
| Rv0486  | intermediary metabolism and respiration |
| Rv1170  | intermediary metabolism and respiration |
| Rv2130c | intermediary metabolism and respiration |
| Rv0819  | intermediary metabolism and respiration |
| Rv0137c | intermediary metabolism and respiration |
| Rv0091  | intermediary metabolism and respiration |
| Rv2855  | intermediary metabolism and respiration |
| Rv3883c | intermediary metabolism and respiration |
| Rv3886c | intermediary metabolism and respiration |
| Rv0291  | intermediary metabolism and respiration |
| Rv3449  | intermediary metabolism and respiration |
| Rv1796  | intermediary metabolism and respiration |
| Rv1594  | intermediary metabolism and respiration |
| Rv1595  | intermediary metabolism and respiration |
| Rv1596  | intermediary metabolism and respiration |
| Rv2421c | intermediary metabolism and respiration |
| Rv2438c | intermediary metabolism and respiration |
| Rv1161  | intermediary metabolism and respiration |
| Rv1162  | intermediary metabolism and respiration |
| Rv1164  | intermediary metabolism and respiration |
| Rv1163  | intermediary metabolism and respiration |
| Rv1736c | intermediary metabolism and respiration |
| Rv3566c | intermediary metabolism and respiration |
| Rv1854c | intermediary metabolism and respiration |
| Rv0392c | intermediary metabolism and respiration |
| Rv2445c | intermediary metabolism and respiration |
| Rv0252  | intermediary metabolism and respiration |
| Rv0253  | intermediary metabolism and respiration |
| Rv3199c | intermediary metabolism and respiration |
| Rv3145  | intermediary metabolism and respiration |
| Rv3146  | intermediary metabolism and respiration |
| Rv3147  | intermediary metabolism and respiration |
| Rv3148  | intermediary metabolism and respiration |
| Rv3149  | intermediary metabolism and respiration |
| Rv3150  | intermediary metabolism and respiration |
| Rv3151  | intermediary metabolism and respiration |
| Rv3152  | intermediary metabolism and respiration |
| Rv3153  | intermediary metabolism and respiration |
| Rv3154  | intermediary metabolism and respiration |
| Rv3155  | intermediary metabolism and respiration |
| Rv3156  | intermediary metabolism and respiration |
| Rv3157  | intermediary metabolism and respiration |
| Rv3158  | intermediary metabolism and respiration |
| Rv2440c | intermediary metabolism and respiration |
| Rv1446c | intermediary metabolism and respiration |
| Rv0266c | intermediary metabolism and respiration |
| Rv2511  | intermediary metabolism and respiration |
| Rv0118c | intermediary metabolism and respiration |
| Rv1005c | intermediary metabolism and respiration |
| Rv2225  | intermediary metabolism and respiration |
| Rv3602c | intermediary metabolism and respiration |
| Rv3601c | intermediary metabolism and respiration |
| Rv2967c | intermediary metabolism and respiration |
| Rv3293  | intermediary metabolism and respiration |
| Rv0211  | intermediary metabolism and respiration |
| Rv0319  | intermediary metabolism and respiration |
| Rv0853c | intermediary metabolism and respiration |
| Rv2497c | intermediary metabolism and respiration |
| Rv2496c | intermediary metabolism and respiration |
| Rv2495c | intermediary metabolism and respiration |
| Rv2607  | intermediary metabolism and respiration |
| Rv0125  | intermediary metabolism and respiration |
| Rv2213  | intermediary metabolism and respiration |
| Rv0800  | intermediary metabolism and respiration |
| Rv0983  | intermediary metabolism and respiration |
| Rv2089c | intermediary metabolism and respiration |
| Rv2467  | intermediary metabolism and respiration |
| Rv2535c | intermediary metabolism and respiration |
| Rv2782c | intermediary metabolism and respiration |
| Rv3010c | intermediary metabolism and respiration |
| Rv2029c | intermediary metabolism and respiration |

|         |                                         |
|---------|-----------------------------------------|
| Rv3138  | intermediary metabolism and respiration |
| Rv0946c | intermediary metabolism and respiration |
| Rv1437  | intermediary metabolism and respiration |
| Rv3068c | intermediary metabolism and respiration |
| Rv3838c | intermediary metabolism and respiration |
| Rv2368c | intermediary metabolism and respiration |
| Rv1095  | intermediary metabolism and respiration |
| Rv3397c | intermediary metabolism and respiration |
| Rv0840c | intermediary metabolism and respiration |
| Rv2351c | intermediary metabolism and respiration |
| Rv2350c | intermediary metabolism and respiration |
| Rv2349c | intermediary metabolism and respiration |
| Rv1755c | intermediary metabolism and respiration |
| Rv3257c | intermediary metabolism and respiration |
| Rv3308  | intermediary metabolism and respiration |
| Rv2043c | intermediary metabolism and respiration |
| Rv0535  | intermediary metabolism and respiration |
| Rv0155  | intermediary metabolism and respiration |
| Rv0156  | intermediary metabolism and respiration |
| Rv0157  | intermediary metabolism and respiration |
| Rv3628  | intermediary metabolism and respiration |
| Rv1127c | intermediary metabolism and respiration |
| Rv2702  | intermediary metabolism and respiration |
| Rv2984  | intermediary metabolism and respiration |
| Rv1695  | intermediary metabolism and respiration |
| Rv0693  | intermediary metabolism and respiration |
| Rv2109c | intermediary metabolism and respiration |
| Rv2110c | intermediary metabolism and respiration |
| Rv2427c | intermediary metabolism and respiration |
| Rv2439c | intermediary metabolism and respiration |
| Rv0500  | intermediary metabolism and respiration |
| Rv1017c | intermediary metabolism and respiration |
| Rv0408  | intermediary metabolism and respiration |
| Rv1014c | intermediary metabolism and respiration |
| Rv0781  | intermediary metabolism and respiration |
| Rv0782  | intermediary metabolism and respiration |
| Rv0357c | intermediary metabolism and respiration |
| Rv0777  | intermediary metabolism and respiration |
| Rv0780  | intermediary metabolism and respiration |
| Rv0772  | intermediary metabolism and respiration |
| Rv3275c | intermediary metabolism and respiration |
| Rv0808  | intermediary metabolism and respiration |
| Rv0957  | intermediary metabolism and respiration |
| Rv3276c | intermediary metabolism and respiration |
| Rv0803  | intermediary metabolism and respiration |
| Rv0809  | intermediary metabolism and respiration |
| Rv0956  | intermediary metabolism and respiration |
| Rv0788  | intermediary metabolism and respiration |
| Rv0389  | intermediary metabolism and respiration |
| Rv2964  | intermediary metabolism and respiration |
| Rv1617  | intermediary metabolism and respiration |
| Rv1380  | intermediary metabolism and respiration |
| Rv1381  | intermediary metabolism and respiration |
| Rv2139  | intermediary metabolism and respiration |
| Rv0382c | intermediary metabolism and respiration |
| Rv1385  | intermediary metabolism and respiration |
| Rv1699  | intermediary metabolism and respiration |
| Rv2883c | intermediary metabolism and respiration |
| Rv2195  | intermediary metabolism and respiration |
| Rv2196  | intermediary metabolism and respiration |
| Rv2194  | intermediary metabolism and respiration |
| Rv1454c | intermediary metabolism and respiration |
| Rv2436  | intermediary metabolism and respiration |
| Rv2583c | intermediary metabolism and respiration |
| Rv1940  | intermediary metabolism and respiration |
| Rv1415  | intermediary metabolism and respiration |
| Rv1412  | intermediary metabolism and respiration |
| Rv2671  | intermediary metabolism and respiration |
| Rv2786c | intermediary metabolism and respiration |
| Rv1409  | intermediary metabolism and respiration |
| Rv1416  | intermediary metabolism and respiration |
| Rv0334  | intermediary metabolism and respiration |
| Rv3464  | intermediary metabolism and respiration |
| Rv3465  | intermediary metabolism and respiration |
| Rv3266c | intermediary metabolism and respiration |
| Rv1187  | intermediary metabolism and respiration |
| Rv2322c | intermediary metabolism and respiration |
| Rv2321c | intermediary metabolism and respiration |
| Rv1408  | intermediary metabolism and respiration |
| Rv2465c | intermediary metabolism and respiration |
| Rv3251c | intermediary metabolism and respiration |









|         |                                         |
|---------|-----------------------------------------|
| Rv2192c | intermediary metabolism and respiration |
| Rv1609  | intermediary metabolism and respiration |
| Rv0013  | intermediary metabolism and respiration |
| Rv1470  | intermediary metabolism and respiration |
| Rv1471  | intermediary metabolism and respiration |
| Rv3913  | intermediary metabolism and respiration |
| Rv3914  | intermediary metabolism and respiration |
| Rv3754  | intermediary metabolism and respiration |
| Rv0322  | intermediary metabolism and respiration |
| Rv3309c | intermediary metabolism and respiration |
| Rv1848  | intermediary metabolism and respiration |
| Rv1849  | intermediary metabolism and respiration |
| Rv1850  | intermediary metabolism and respiration |
| Rv1853  | intermediary metabolism and respiration |
| Rv1851  | intermediary metabolism and respiration |
| Rv1852  | intermediary metabolism and respiration |
| Rv2895c | intermediary metabolism and respiration |
| Rv0729  | intermediary metabolism and respiration |
| Rv1121  | intermediary metabolism and respiration |
| Rv1447c | intermediary metabolism and respiration |
| Rv2501c | lipid metabolism                        |
| Rv0973c | lipid metabolism                        |
| Rv3285  | lipid metabolism                        |
| Rv2502c | lipid metabolism                        |
| Rv0974c | lipid metabolism                        |
| Rv0904c | lipid metabolism                        |
| Rv3799c | lipid metabolism                        |
| Rv3280  | lipid metabolism                        |
| Rv2247  | lipid metabolism                        |
| Rv0033  | lipid metabolism                        |
| Rv2244  | lipid metabolism                        |
| Rv2523c | lipid metabolism                        |
| Rv3391  | lipid metabolism                        |
| Rv3667  | lipid metabolism                        |
| Rv3107c | lipid metabolism                        |
| Rv3252c | lipid metabolism                        |
| Rv2289  | lipid metabolism                        |
| Rv2881c | lipid metabolism                        |
| Rv3409c | lipid metabolism                        |
| Rv3392c | lipid metabolism                        |
| Rv0503c | lipid metabolism                        |
| Rv0824c | lipid metabolism                        |
| Rv1094  | lipid metabolism                        |
| Rv3229c | lipid metabolism                        |
| Rv0222  | lipid metabolism                        |
| Rv1142c | lipid metabolism                        |
| Rv1141c | lipid metabolism                        |
| Rv1472  | lipid metabolism                        |
| Rv1935c | lipid metabolism                        |
| Rv2486  | lipid metabolism                        |
| Rv2679  | lipid metabolism                        |
| Rv2831  | lipid metabolism                        |
| Rv3039c | lipid metabolism                        |
| Rv3373  | lipid metabolism                        |
| Rv3374  | lipid metabolism                        |
| Rv3516  | lipid metabolism                        |
| Rv0456c | lipid metabolism                        |
| Rv3550  | lipid metabolism                        |
| Rv3774  | lipid metabolism                        |
| Rv0632c | lipid metabolism                        |
| Rv0673  | lipid metabolism                        |
| Rv0675  | lipid metabolism                        |
| Rv0905  | lipid metabolism                        |
| Rv0971c | lipid metabolism                        |
| Rv1070c | lipid metabolism                        |
| Rv1071c | lipid metabolism                        |
| Rv1814  | lipid metabolism                        |
| Rv2243  | lipid metabolism                        |
| Rv0649  | lipid metabolism                        |
| Rv1483  | lipid metabolism                        |
| Rv1350  | lipid metabolism                        |
| Rv2002  | lipid metabolism                        |
| Rv0242c | lipid metabolism                        |
| Rv0533c | lipid metabolism                        |
| Rv0859  | lipid metabolism                        |
| Rv0243  | lipid metabolism                        |
| Rv1074c | lipid metabolism                        |
| Rv1323  | lipid metabolism                        |
| Rv3546  | lipid metabolism                        |
| Rv3556c | lipid metabolism                        |
| Rv0860  | lipid metabolism                        |



|         |                  |
|---------|------------------|
| Rv0468  | lipid metabolism |
| Rv1715  | lipid metabolism |
| Rv3141  | lipid metabolism |
| Rv1912c | lipid metabolism |
| Rv1750c | lipid metabolism |
| Rv0099  | lipid metabolism |
| Rv1550  | lipid metabolism |
| Rv1549  | lipid metabolism |
| Rv1427c | lipid metabolism |
| Rv3089  | lipid metabolism |
| Rv1058  | lipid metabolism |
| Rv2187  | lipid metabolism |
| Rv0852  | lipid metabolism |
| Rv3506  | lipid metabolism |
| Rv3513c | lipid metabolism |
| Rv3515c | lipid metabolism |
| Rv0270  | lipid metabolism |
| Rv1185c | lipid metabolism |
| Rv2948c | lipid metabolism |
| Rv3826  | lipid metabolism |
| Rv1529  | lipid metabolism |
| Rv1521  | lipid metabolism |
| Rv2930  | lipid metabolism |
| Rv2941  | lipid metabolism |
| Rv2950c | lipid metabolism |
| Rv3561  | lipid metabolism |
| Rv0404  | lipid metabolism |
| Rv1925  | lipid metabolism |
| Rv3801c | lipid metabolism |
| Rv1345  | lipid metabolism |
| Rv0035  | lipid metabolism |
| Rv2505c | lipid metabolism |
| Rv1193  | lipid metabolism |
| Rv0214  | lipid metabolism |
| Rv0166  | lipid metabolism |
| Rv1206  | lipid metabolism |
| Rv0119  | lipid metabolism |
| Rv0551c | lipid metabolism |
| Rv2590  | lipid metabolism |
| Rv0131c | lipid metabolism |
| Rv0873  | lipid metabolism |
| Rv0972c | lipid metabolism |
| Rv0975c | lipid metabolism |
| Rv1346  | lipid metabolism |
| Rv1467c | lipid metabolism |
| Rv1679  | lipid metabolism |
| Rv1934c | lipid metabolism |
| Rv1933c | lipid metabolism |
| Rv2500c | lipid metabolism |
| Rv0154c | lipid metabolism |
| Rv2724c | lipid metabolism |
| Rv2789c | lipid metabolism |
| Rv3061c | lipid metabolism |
| Rv3140  | lipid metabolism |
| Rv3139  | lipid metabolism |
| Rv3274c | lipid metabolism |
| Rv3504  | lipid metabolism |
| Rv3505  | lipid metabolism |
| Rv3544c | lipid metabolism |
| Rv3543c | lipid metabolism |
| Rv0215c | lipid metabolism |
| Rv3560c | lipid metabolism |
| Rv3562  | lipid metabolism |
| Rv3563  | lipid metabolism |
| Rv3564  | lipid metabolism |
| Rv3573c | lipid metabolism |
| Rv3797  | lipid metabolism |
| Rv3761c | lipid metabolism |
| Rv0231  | lipid metabolism |
| Rv0244c | lipid metabolism |
| Rv0271c | lipid metabolism |
| Rv0400c | lipid metabolism |
| Rv0672  | lipid metabolism |
| Rv0752c | lipid metabolism |
| Rv1175c | lipid metabolism |
| Rv0855  | lipid metabolism |
| Rv2524c | lipid metabolism |
| Rv3804c | lipid metabolism |
| Rv1886c | lipid metabolism |
| Rv0129c | lipid metabolism |
| Rv3803c | lipid metabolism |

|         |                  |
|---------|------------------|
| Rv0564c | lipid metabolism |
| Rv2982c | lipid metabolism |
| Rv3398c | lipid metabolism |
| Rv2173  | lipid metabolism |
| Rv3383c | lipid metabolism |
| Rv1484  | lipid metabolism |
| Rv2245  | lipid metabolism |
| Rv2246  | lipid metabolism |
| Rv3540c | lipid metabolism |
| Rv3523  | lipid metabolism |
| Rv3522  | lipid metabolism |
| Rv2940c | lipid metabolism |
| Rv2384  | lipid metabolism |
| Rv2383c | lipid metabolism |
| Rv2382c | lipid metabolism |
| Rv2381c | lipid metabolism |
| Rv2380c | lipid metabolism |
| Rv2379c | lipid metabolism |
| Rv2378c | lipid metabolism |
| Rv2377c | lipid metabolism |
| Rv2386c | lipid metabolism |
| Rv2385  | lipid metabolism |
| Rv1143  | lipid metabolism |
| Rv0645c | lipid metabolism |
| Rv0644c | lipid metabolism |
| Rv0643c | lipid metabolism |
| Rv0642c | lipid metabolism |
| Rv1492  | lipid metabolism |
| Rv1493  | lipid metabolism |
| Rv0101  | lipid metabolism |
| Rv1153c | lipid metabolism |
| Rv3824c | lipid metabolism |
| Rv3820c | lipid metabolism |
| Rv1182  | lipid metabolism |
| Rv1528c | lipid metabolism |
| Rv2939  | lipid metabolism |
| Rv0470c | lipid metabolism |
| Rv2612c | lipid metabolism |
| Rv1822  | lipid metabolism |
| Rv2746c | lipid metabolism |
| Rv0230c | lipid metabolism |
| Rv2610c | lipid metabolism |
| Rv2188c | lipid metabolism |
| Rv2946c | lipid metabolism |
| Rv1660  | lipid metabolism |
| Rv1665  | lipid metabolism |
| Rv2048c | lipid metabolism |
| Rv3800c | lipid metabolism |
| Rv2947c | lipid metabolism |
| Rv1013  | lipid metabolism |
| Rv1663  | lipid metabolism |
| Rv3825c | lipid metabolism |
| Rv1180  | lipid metabolism |
| Rv1181  | lipid metabolism |
| Rv1527c | lipid metabolism |
| Rv0405  | lipid metabolism |
| Rv1661  | lipid metabolism |
| Rv1662  | lipid metabolism |
| Rv1664  | lipid metabolism |
| Rv1551  | lipid metabolism |
| Rv2482c | lipid metabolism |
| Rv2483c | lipid metabolism |
| Rv2931  | lipid metabolism |
| Rv2932  | lipid metabolism |
| Rv2933  | lipid metabolism |
| Rv2934  | lipid metabolism |
| Rv2935  | lipid metabolism |
| Rv0437c | lipid metabolism |
| Rv0436c | lipid metabolism |
| Rv0045c | lipid metabolism |
| Rv0914c | lipid metabolism |
| Rv0947c | lipid metabolism |
| Rv1135A | lipid metabolism |
| Rv1136  | lipid metabolism |
| Rv1344  | lipid metabolism |
| Rv1543  | lipid metabolism |
| Rv1544  | lipid metabolism |
| Rv1627c | lipid metabolism |
| Rv1683  | lipid metabolism |
| Rv1722  | lipid metabolism |
| Rv1866  | lipid metabolism |

|         |                  |
|---------|------------------|
| Rv1867  | lipid metabolism |
| Rv2261c | lipid metabolism |
| Rv2262c | lipid metabolism |
| Rv2611c | lipid metabolism |
| Rv2613c | lipid metabolism |
| Rv3720  | lipid metabolism |
| Rv2504c | lipid metabolism |
| Rv2503c | lipid metabolism |
| Rv3221c | lipid metabolism |
| Rv2928  | lipid metabolism |
| Rv1618  | lipid metabolism |
| Rv2605c | lipid metabolism |
| Rv3130c | lipid metabolism |
| Rv0447c | lipid metabolism |
| Rv0469  | lipid metabolism |
| Rv1169c | PE_PPE           |
| Rv3097c | PE_PPE           |
| Rv0109  | PE_PPE           |
| Rv0747  | PE_PPE           |
| Rv0754  | PE_PPE           |
| Rv0832  | PE_PPE           |
| Rv0833  | PE_PPE           |
| Rv0834c | PE_PPE           |
| Rv0872c | PE_PPE           |
| Rv0977  | PE_PPE           |
| Rv0978c | PE_PPE           |
| Rv0980c | PE_PPE           |
| Rv1067c | PE_PPE           |
| Rv0124  | PE_PPE           |
| Rv1068c | PE_PPE           |
| Rv1087  | PE_PPE           |
| Rv1091  | PE_PPE           |
| Rv1243c | PE_PPE           |
| Rv1325c | PE_PPE           |
| Rv1396c | PE_PPE           |
| Rv1441c | PE_PPE           |
| Rv1450c | PE_PPE           |
| Rv1452c | PE_PPE           |
| Rv1468c | PE_PPE           |
| Rv0278c | PE_PPE           |
| Rv1651c | PE_PPE           |
| Rv1768  | PE_PPE           |
| Rv1803c | PE_PPE           |
| Rv1818c | PE_PPE           |
| Rv1840c | PE_PPE           |
| Rv1983  | PE_PPE           |
| Rv2098c | PE_PPE           |
| Rv2126c | PE_PPE           |
| Rv2162c | PE_PPE           |
| Rv2340c | PE_PPE           |
| Rv0279c | PE_PPE           |
| Rv2371  | PE_PPE           |
| Rv2396  | PE_PPE           |
| Rv2487c | PE_PPE           |
| Rv2490c | PE_PPE           |
| Rv2591  | PE_PPE           |
| Rv2615c | PE_PPE           |
| Rv2634c | PE_PPE           |
| Rv2741  | PE_PPE           |
| Rv2853  | PE_PPE           |
| Rv3344c | PE_PPE           |
| Rv0297  | PE_PPE           |
| Rv3345c | PE_PPE           |
| Rv3367  | PE_PPE           |
| Rv3388  | PE_PPE           |
| Rv3507  | PE_PPE           |
| Rv3508  | PE_PPE           |
| Rv3511  | PE_PPE           |
| Rv3512  | PE_PPE           |
| Rv3514  | PE_PPE           |
| Rv3590c | PE_PPE           |
| Rv3595c | PE_PPE           |
| Rv0532  | PE_PPE           |
| Rv3652  | PE_PPE           |
| Rv3653  | PE_PPE           |
| Rv3812  | PE_PPE           |
| Rv0578c | PE_PPE           |
| Rv0742  | PE_PPE           |
| Rv0746  | PE_PPE           |
| Rv0151c | PE_PPE           |
| Rv1089  | PE_PPE           |

|         |        |
|---------|--------|
| Rv1172c | PE_PPE |
| Rv1195  | PE_PPE |
| Rv1214c | PE_PPE |
| Rv1386  | PE_PPE |
| Rv1430  | PE_PPE |
| Rv1646  | PE_PPE |
| Rv1788  | PE_PPE |
| Rv1791  | PE_PPE |
| Rv0152c | PE_PPE |
| Rv1806  | PE_PPE |
| Rv2099c | PE_PPE |
| Rv2107  | PE_PPE |
| Rv2328  | PE_PPE |
| Rv2408  | PE_PPE |
| Rv2431c | PE_PPE |
| Rv2519  | PE_PPE |
| Rv2769c | PE_PPE |
| Rv3018A | PE_PPE |
| Rv3022A | PE_PPE |
| Rv0159c | PE_PPE |
| Rv3477  | PE_PPE |
| Rv3622c | PE_PPE |
| Rv3650  | PE_PPE |
| Rv3746c | PE_PPE |
| Rv3872  | PE_PPE |
| Rv3893c | PE_PPE |
| Rv0160c | PE_PPE |
| Rv0285  | PE_PPE |
| Rv0335c | PE_PPE |
| Rv0916c | PE_PPE |
| Rv1040c | PE_PPE |
| Rv1088  | PE_PPE |
| Rv0096  | PE_PPE |
| Rv0442c | PE_PPE |
| Rv0453  | PE_PPE |
| Rv0755c | PE_PPE |
| Rv0878c | PE_PPE |
| Rv0915c | PE_PPE |
| Rv1039c | PE_PPE |
| Rv1135c | PE_PPE |
| Rv1168c | PE_PPE |
| Rv1196  | PE_PPE |
| Rv1361c | PE_PPE |
| Rv0256c | PE_PPE |
| Rv1387  | PE_PPE |
| Rv1548c | PE_PPE |
| Rv1705c | PE_PPE |
| Rv1706c | PE_PPE |
| Rv1753c | PE_PPE |
| Rv1787  | PE_PPE |
| Rv1789  | PE_PPE |
| Rv1790  | PE_PPE |
| Rv1800  | PE_PPE |
| Rv1801  | PE_PPE |
| Rv0280  | PE_PPE |
| Rv1802  | PE_PPE |
| Rv1807  | PE_PPE |
| Rv1808  | PE_PPE |
| Rv1809  | PE_PPE |
| Rv1917c | PE_PPE |
| Rv1918c | PE_PPE |
| Rv2108  | PE_PPE |
| Rv2123  | PE_PPE |
| Rv2352c | PE_PPE |
| Rv2353c | PE_PPE |
| Rv0286  | PE_PPE |
| Rv2356c | PE_PPE |
| Rv2430c | PE_PPE |
| Rv2608  | PE_PPE |
| Rv2768c | PE_PPE |
| Rv2770c | PE_PPE |
| Rv2892c | PE_PPE |
| Rv3018c | PE_PPE |
| Rv3021c | PE_PPE |
| Rv3022c | PE_PPE |
| Rv3125c | PE_PPE |
| Rv0304c | PE_PPE |
| Rv3135  | PE_PPE |
| Rv3136  | PE_PPE |
| Rv3144c | PE_PPE |
| Rv3159c | PE_PPE |

|         |                     |
|---------|---------------------|
| Rv3343c | PE_PPE              |
| Rv3347c | PE_PPE              |
| Rv3350c | PE_PPE              |
| Rv3425  | PE_PPE              |
| Rv3426  | PE_PPE              |
| Rv3429  | PE_PPE              |
| Rv0305c | PE_PPE              |
| Rv3478  | PE_PPE              |
| Rv3532  | PE_PPE              |
| Rv3533c | PE_PPE              |
| Rv3539  | PE_PPE              |
| Rv3558  | PE_PPE              |
| Rv3621c | PE_PPE              |
| Rv3738c | PE_PPE              |
| Rv3739c | PE_PPE              |
| Rv3873  | PE_PPE              |
| Rv3892c | PE_PPE              |
| Rv0354c | PE_PPE              |
| Rv0355c | PE_PPE              |
| Rv0388c | PE_PPE              |
| Rv1759c | PE_PPE              |
| Rv1657  | regulatory proteins |
| Rv1994c | regulatory proteins |
| Rv3133c | regulatory proteins |
| Rv3132c | regulatory proteins |
| Rv2027c | regulatory proteins |
| Rv1267c | regulatory proteins |
| Rv3855  | regulatory proteins |
| Rv0020c | regulatory proteins |
| Rv0019c | regulatory proteins |
| Rv1909c | regulatory proteins |
| Rv2359  | regulatory proteins |
| Rv2919c | regulatory proteins |
| Rv2711  | regulatory proteins |
| Rv1028c | regulatory proteins |
| Rv1027c | regulatory proteins |
| Rv2720  | regulatory proteins |
| Rv1963c | regulatory proteins |
| Rv1479  | regulatory proteins |
| Rv3692  | regulatory proteins |
| Rv3164c | regulatory proteins |
| Rv0981  | regulatory proteins |
| Rv0982  | regulatory proteins |
| Rv3246c | regulatory proteins |
| Rv3245c | regulatory proteins |
| Rv0212c | regulatory proteins |
| Rv0844c | regulatory proteins |
| Rv3744  | regulatory proteins |
| Rv0117  | regulatory proteins |
| Rv0757  | regulatory proteins |
| Rv0758  | regulatory proteins |
| Rv0015c | regulatory proteins |
| Rv0014c | regulatory proteins |
| Rv0931c | regulatory proteins |
| Rv1743  | regulatory proteins |
| Rv1746  | regulatory proteins |
| Rv0410c | regulatory proteins |
| Rv1266c | regulatory proteins |
| Rv2914c | regulatory proteins |
| Rv2088  | regulatory proteins |
| Rv3080c | regulatory proteins |
| Rv2176  | regulatory proteins |
| Rv0903c | regulatory proteins |
| Rv0902c | regulatory proteins |
| Rv0018c | regulatory proteins |
| Rv0153c | regulatory proteins |
| Rv2234  | regulatory proteins |
| Rv1379  | regulatory proteins |
| Rv0491  | regulatory proteins |
| Rv3853  | regulatory proteins |
| Rv0023  | regulatory proteins |
| Rv0042c | regulatory proteins |
| Rv0043c | regulatory proteins |
| Rv0067c | regulatory proteins |
| Rv0078  | regulatory proteins |
| Rv0081  | regulatory proteins |
| Rv0135c | regulatory proteins |
| Rv0144  | regulatory proteins |
| Rv0158  | regulatory proteins |
| Rv0165c | regulatory proteins |
| Rv0195  | regulatory proteins |

|         |                     |
|---------|---------------------|
| Rv0196  | regulatory proteins |
| Rv0232  | regulatory proteins |
| Rv0238  | regulatory proteins |
| Rv0260c | regulatory proteins |
| Rv0273c | regulatory proteins |
| Rv0275c | regulatory proteins |
| Rv0302  | regulatory proteins |
| Rv0324  | regulatory proteins |
| Rv0328  | regulatory proteins |
| Rv0339c | regulatory proteins |
| Rv0348  | regulatory proteins |
| Rv0377  | regulatory proteins |
| Rv0386  | regulatory proteins |
| Rv0452  | regulatory proteins |
| Rv0465c | regulatory proteins |
| Rv0472c | regulatory proteins |
| Rv0474  | regulatory proteins |
| Rv0485  | regulatory proteins |
| Rv0494  | regulatory proteins |
| Rv0576  | regulatory proteins |
| Rv0586  | regulatory proteins |
| Rv0600c | regulatory proteins |
| Rv0601c | regulatory proteins |
| Rv0653c | regulatory proteins |
| Rv0681  | regulatory proteins |
| Rv0691c | regulatory proteins |
| Rv0737  | regulatory proteins |
| Rv0744c | regulatory proteins |
| Rv0792c | regulatory proteins |
| Rv0818  | regulatory proteins |
| Rv0823c | regulatory proteins |
| Rv0827c | regulatory proteins |
| Rv0845  | regulatory proteins |
| Rv0880  | regulatory proteins |
| Rv0890c | regulatory proteins |
| Rv0891c | regulatory proteins |
| Rv0894  | regulatory proteins |
| Rv1019  | regulatory proteins |
| Rv1049  | regulatory proteins |
| Rv1129c | regulatory proteins |
| Rv1151c | regulatory proteins |
| Rv1152  | regulatory proteins |
| Rv1167c | regulatory proteins |
| Rv1219c | regulatory proteins |
| Rv1255c | regulatory proteins |
| Rv1332  | regulatory proteins |
| Rv1353c | regulatory proteins |
| Rv1358  | regulatory proteins |
| Rv1359  | regulatory proteins |
| Rv1395  | regulatory proteins |
| Rv1404  | regulatory proteins |
| Rv1453  | regulatory proteins |
| Rv1460  | regulatory proteins |
| Rv1473A | regulatory proteins |
| Rv1474c | regulatory proteins |
| Rv1534  | regulatory proteins |
| Rv1556  | regulatory proteins |
| Rv1626  | regulatory proteins |
| Rv1674c | regulatory proteins |
| Rv1675c | regulatory proteins |
| Rv1719  | regulatory proteins |
| Rv1773c | regulatory proteins |
| Rv1776c | regulatory proteins |
| Rv1816  | regulatory proteins |
| Rv1846c | regulatory proteins |
| Rv1931c | regulatory proteins |
| Rv1985c | regulatory proteins |
| Rv1990c | regulatory proteins |
| Rv2017  | regulatory proteins |
| Rv2021c | regulatory proteins |
| Rv2034  | regulatory proteins |
| Rv2160A | regulatory proteins |
| Rv2160c | regulatory proteins |
| Rv2175c | regulatory proteins |
| Rv2250c | regulatory proteins |
| Rv2258c | regulatory proteins |
| Rv2282c | regulatory proteins |
| Rv2324  | regulatory proteins |
| Rv2358  | regulatory proteins |
| Rv2488c | regulatory proteins |
| Rv2506  | regulatory proteins |

|         |                     |
|---------|---------------------|
| Rv2621c | regulatory proteins |
| Rv2640c | regulatory proteins |
| Rv2642  | regulatory proteins |
| Rv2745c | regulatory proteins |
| Rv2779c | regulatory proteins |
| Rv2884  | regulatory proteins |
| Rv2887  | regulatory proteins |
| Rv2912c | regulatory proteins |
| Rv2989  | regulatory proteins |
| Rv3050c | regulatory proteins |
| Rv3055  | regulatory proteins |
| Rv3058c | regulatory proteins |
| Rv3060c | regulatory proteins |
| Rv3066  | regulatory proteins |
| Rv3095  | regulatory proteins |
| Rv3124  | regulatory proteins |
| Rv3143  | regulatory proteins |
| Rv3160c | regulatory proteins |
| Rv3167c | regulatory proteins |
| Rv3173c | regulatory proteins |
| Rv3183  | regulatory proteins |
| Rv3208  | regulatory proteins |
| Rv3220c | regulatory proteins |
| Rv3249c | regulatory proteins |
| Rv3291c | regulatory proteins |
| Rv3295  | regulatory proteins |
| Rv3334  | regulatory proteins |
| Rv3405c | regulatory proteins |
| Rv3557c | regulatory proteins |
| Rv3574  | regulatory proteins |
| Rv3575c | regulatory proteins |
| Rv3583c | regulatory proteins |
| Rv3676  | regulatory proteins |
| Rv3736  | regulatory proteins |
| Rv3830c | regulatory proteins |
| Rv3833  | regulatory proteins |
| Rv3840  | regulatory proteins |
| Rv0490  | regulatory proteins |
| Rv2788  | regulatory proteins |
| Rv0602c | regulatory proteins |
| Rv3765c | regulatory proteins |
| Rv3764c | regulatory proteins |
| Rv1033c | regulatory proteins |
| Rv1032c | regulatory proteins |
| Rv1423  | regulatory proteins |
| Rv3219  | regulatory proteins |
| Rv3260c | regulatory proteins |
| Rv3416  | regulatory proteins |
| Rv3681c | regulatory proteins |
| Rv0022c | regulatory proteins |
| Rv3862c | regulatory proteins |
| Rv3197A | regulatory proteins |
| Rv3281  | unknown             |
| Rv2673  | unknown             |
| Rv2747  | unknown             |
| Rv2497c | unknown             |
| Rv2495c | unknown             |
| Rv1331  | unknown             |
| Rv1675c | unknown             |
| Rv0858c | unknown             |
| Rv3790  | unknown             |
| Rv3791  | unknown             |
| Rv0282  | unknown             |
| Rv1783  | unknown             |
| Rv3870  | unknown             |
| Rv3871  | unknown             |
| Rv1795  | unknown             |
| Rv3885c | unknown             |
| Rv3881c | unknown             |
| Rv3615c | unknown             |
| Rv3614c | unknown             |
| Rv3889c | unknown             |
| Rv3880c | unknown             |
| Rv3849  | unknown             |
| Rv1099c | unknown             |
| Rv2419c | unknown             |
| Rv0635  | unknown             |
| Rv0636  | unknown             |
| Rv0637  | unknown             |
| Rv2626c | unknown             |
| Rv0241c | unknown             |

|         |                                     |
|---------|-------------------------------------|
| Rv3389c | unknown                             |
| Rv3526  | unknown                             |
| Rv3291c | unknown                             |
| Rv0127  | unknown                             |
| Rv1991c | unknown                             |
| Rv1347c | unknown                             |
| Rv1346  | unknown                             |
| Rv0165c | unknown                             |
| Rv0586  | unknown                             |
| Rv1334  | unknown                             |
| Rv3592  | unknown                             |
| Rv2674  | unknown                             |
| Rv2097c | unknown                             |
| Rv2794c | unknown                             |
| Rv2232  | unknown                             |
| Rv2111c | unknown                             |
| Rv0634B | unknown                             |
| Rv1222  | unknown                             |
| Rv3221A | unknown                             |
| Rv0444c | unknown                             |
| Rv0325  | unknown                             |
| Rv0326  | unknown                             |
| Rv1046c | unknown                             |
| Rv1502  | unknown                             |
| Rv1506c | unknown                             |
| Rv1507A | unknown                             |
| Rv1509  | unknown                             |
| Rv1742  | unknown                             |
| Rv2084  | unknown                             |
| Rv2292c | unknown                             |
| Rv2348c | unknown                             |
| Rv2645  | unknown                             |
| Rv2818c | unknown                             |
| Rv3599c | unknown                             |
| Rv3889c | unknown                             |
| Rv2333c | unknown                             |
| Rv3734c | unknown                             |
| Rv3088  | unknown                             |
| Rv3806c | unknown                             |
| Rv1259  | unknown                             |
| Rv0262c | virulence detoxification adaptation |
| Rv2428  | virulence detoxification adaptation |
| Rv2429  | virulence detoxification adaptation |
| Rv2238c | virulence detoxification adaptation |
| Rv2521  | virulence detoxification adaptation |
| Rv1608c | virulence detoxification adaptation |
| Rv3473c | virulence detoxification adaptation |
| Rv1123c | virulence detoxification adaptation |
| Rv0554  | virulence detoxification adaptation |
| Rv0798c | virulence detoxification adaptation |
| Rv1901  | virulence detoxification adaptation |
| Rv0384c | virulence detoxification adaptation |
| Rv3648c | virulence detoxification adaptation |
| Rv0871  | virulence detoxification adaptation |
| Rv3063  | virulence detoxification adaptation |
| Rv0352  | virulence detoxification adaptation |
| Rv2373c | virulence detoxification adaptation |
| Rv0350  | virulence detoxification adaptation |
| Rv2416c | virulence detoxification adaptation |
| Rv3617  | virulence detoxification adaptation |
| Rv1938  | virulence detoxification adaptation |
| Rv1124  | virulence detoxification adaptation |
| Rv2214c | virulence detoxification adaptation |
| Rv3670  | virulence detoxification adaptation |
| Rv0134  | virulence detoxification adaptation |
| Rv2740  | virulence detoxification adaptation |
| Rv3417c | virulence detoxification adaptation |
| Rv0440  | virulence detoxification adaptation |
| Rv3418c | virulence detoxification adaptation |
| Rv0351  | virulence detoxification adaptation |
| Rv1956  | virulence detoxification adaptation |
| Rv1955  | virulence detoxification adaptation |
| Rv3171c | virulence detoxification adaptation |
| Rv2374c | virulence detoxification adaptation |
| Rv0251c | virulence detoxification adaptation |
| Rv0353  | virulence detoxification adaptation |
| Rv2031c | virulence detoxification adaptation |
| Rv2299c | virulence detoxification adaptation |
| Rv0563  | virulence detoxification adaptation |
| Rv1908c | virulence detoxification adaptation |
| Rv0456B | virulence detoxification adaptation |



|         |                                     |
|---------|-------------------------------------|
| Rv0660c | virulence detoxification adaptation |
| Rv1103c | virulence detoxification adaptation |
| Rv1494  | virulence detoxification adaptation |
| Rv1943c | virulence detoxification adaptation |
| Rv1991A | virulence detoxification adaptation |
| Rv2063  | virulence detoxification adaptation |
| Rv2274A | virulence detoxification adaptation |
| Rv2801A | virulence detoxification adaptation |
| Rv0456A | virulence detoxification adaptation |
| Rv0659c | virulence detoxification adaptation |
| Rv1102c | virulence detoxification adaptation |
| Rv1495  | virulence detoxification adaptation |
| Rv1942c | virulence detoxification adaptation |
| Rv2063A | virulence detoxification adaptation |
| Rv2274c | virulence detoxification adaptation |
| Rv2801c | virulence detoxification adaptation |
| Rv1082  | virulence detoxification adaptation |
| Rv0169  | virulence detoxification adaptation |
| Rv0170  | virulence detoxification adaptation |
| Rv0171  | virulence detoxification adaptation |
| Rv0172  | virulence detoxification adaptation |
| Rv0174  | virulence detoxification adaptation |
| Rv0589  | virulence detoxification adaptation |
| Rv0590  | virulence detoxification adaptation |
| Rv0591  | virulence detoxification adaptation |
| Rv0592  | virulence detoxification adaptation |
| Rv0594  | virulence detoxification adaptation |
| Rv1966  | virulence detoxification adaptation |
| Rv1967  | virulence detoxification adaptation |
| Rv1968  | virulence detoxification adaptation |
| Rv1969  | virulence detoxification adaptation |
| Rv1971  | virulence detoxification adaptation |
| Rv3499c | virulence detoxification adaptation |
| Rv3498c | virulence detoxification adaptation |
| Rv3497c | virulence detoxification adaptation |
| Rv3496c | virulence detoxification adaptation |
| Rv3494c | virulence detoxification adaptation |
| Rv3176c | virulence detoxification adaptation |
| Rv3490  | virulence detoxification adaptation |
| Rv2006  | virulence detoxification adaptation |
| Rv3372  | virulence detoxification adaptation |
| Rv1960c | virulence detoxification adaptation |
| Rv2142A | virulence detoxification adaptation |
| Rv1959c | virulence detoxification adaptation |
| Rv2142c | virulence detoxification adaptation |
| Rv3758c | virulence detoxification adaptation |
| Rv3757c | virulence detoxification adaptation |
| Rv3759c | virulence detoxification adaptation |
| Rv3756c | virulence detoxification adaptation |
| Rv1247c | virulence detoxification adaptation |
| Rv1246c | virulence detoxification adaptation |
| Rv2865  | virulence detoxification adaptation |
| Rv2866  | virulence detoxification adaptation |
| Rv3357  | virulence detoxification adaptation |
| Rv3358  | virulence detoxification adaptation |
| Rv1477  | virulence detoxification adaptation |
| Rv0024  | virulence detoxification adaptation |
| Rv0590A | virulence detoxification adaptation |
| Rv0634c | virulence detoxification adaptation |
| Rv1026  | virulence detoxification adaptation |
| Rv1085c | virulence detoxification adaptation |
| Rv1478  | virulence detoxification adaptation |
| Rv1566c | virulence detoxification adaptation |
| Rv2190c | virulence detoxification adaptation |
| Rv2303c | virulence detoxification adaptation |
| Rv2581c | virulence detoxification adaptation |
| Rv3177  | virulence detoxification adaptation |
| Rv3269  | virulence detoxification adaptation |
| Rv3660c | virulence detoxification adaptation |
| Rv3661  | virulence detoxification adaptation |
| Rv3922c | virulence detoxification adaptation |
| Rv3100c | virulence detoxification adaptation |
| Rv3846  | virulence detoxification adaptation |
| Rv0432  | virulence detoxification adaptation |
| Rv2701c | virulence detoxification adaptation |
| Rv1694  | virulence detoxification adaptation |
| Rv1932  | virulence detoxification adaptation |
| Rv0126  | virulence detoxification adaptation |
| Rv1564c | virulence detoxification adaptation |
| Rv1563c | virulence detoxification adaptation |
| Rv1562c | virulence detoxification adaptation |

|         |                                     |
|---------|-------------------------------------|
| Rv0064A | virulence detoxification adaptation |
| Rv1398c | virulence detoxification adaptation |
| Rv1560  | virulence detoxification adaptation |
| Rv1721c | virulence detoxification adaptation |
| Rv1839c | virulence detoxification adaptation |
| Rv1952  | virulence detoxification adaptation |
| Rv2009  | virulence detoxification adaptation |
| Rv2231B | virulence detoxification adaptation |
| Rv2526  | virulence detoxification adaptation |
| Rv2545  | virulence detoxification adaptation |
| Rv2547  | virulence detoxification adaptation |
| Rv0300  | virulence detoxification adaptation |
| Rv2550c | virulence detoxification adaptation |
| Rv2758c | virulence detoxification adaptation |
| Rv2830c | virulence detoxification adaptation |
| Rv2862A | virulence detoxification adaptation |
| Rv0239  | virulence detoxification adaptation |
| Rv0581  | virulence detoxification adaptation |
| Rv0599c | virulence detoxification adaptation |
| Rv0608  | virulence detoxification adaptation |
| Rv0616A | virulence detoxification adaptation |
| Rv0550c | virulence detoxification adaptation |
| Rv0623  | virulence detoxification adaptation |
| Rv0748  | virulence detoxification adaptation |
| Rv1113  | virulence detoxification adaptation |
| Rv1241  | virulence detoxification adaptation |
| Rv1740  | virulence detoxification adaptation |
| Rv1962A | virulence detoxification adaptation |
| Rv1982A | virulence detoxification adaptation |
| Rv2104c | virulence detoxification adaptation |
| Rv2493  | virulence detoxification adaptation |
| Rv2530A | virulence detoxification adaptation |
| Rv0596c | virulence detoxification adaptation |
| Rv2595  | virulence detoxification adaptation |
| Rv2601A | virulence detoxification adaptation |
| Rv2760c | virulence detoxification adaptation |
| Rv2871  | virulence detoxification adaptation |
| Rv3321c | virulence detoxification adaptation |
| Rv3385c | virulence detoxification adaptation |
| Rv3407  | virulence detoxification adaptation |
| Rv3697A | virulence detoxification adaptation |
| Rv0626  | virulence detoxification adaptation |
| Rv0657c | virulence detoxification adaptation |
| Rv0662c | virulence detoxification adaptation |
| Rv0664  | virulence detoxification adaptation |
| Rv0959A | virulence detoxification adaptation |
| Rv0065  | virulence detoxification adaptation |
| Rv1397c | virulence detoxification adaptation |
| Rv1561  | virulence detoxification adaptation |
| Rv1720c | virulence detoxification adaptation |
| Rv1838c | virulence detoxification adaptation |
| Rv1953  | virulence detoxification adaptation |
| Rv2010  | virulence detoxification adaptation |
| Rv2231A | virulence detoxification adaptation |
| Rv2527  | virulence detoxification adaptation |
| Rv2546  | virulence detoxification adaptation |
| Rv2548  | virulence detoxification adaptation |
| Rv0301  | virulence detoxification adaptation |
| Rv2549c | virulence detoxification adaptation |
| Rv2757c | virulence detoxification adaptation |
| Rv2829c | virulence detoxification adaptation |
| Rv2863  | virulence detoxification adaptation |
| Rv0240  | virulence detoxification adaptation |
| Rv0277c | virulence detoxification adaptation |
| Rv0582  | virulence detoxification adaptation |
| Rv0598c | virulence detoxification adaptation |
| Rv0609  | virulence detoxification adaptation |
| Rv0617  | virulence detoxification adaptation |
| Rv0549c | virulence detoxification adaptation |
| Rv0624  | virulence detoxification adaptation |
| Rv0749  | virulence detoxification adaptation |
| Rv1114  | virulence detoxification adaptation |
| Rv1242  | virulence detoxification adaptation |
| Rv1741  | virulence detoxification adaptation |
| Rv1962c | virulence detoxification adaptation |
| Rv1982c | virulence detoxification adaptation |
| Rv2103c | virulence detoxification adaptation |
| Rv2494  | virulence detoxification adaptation |
| Rv2530c | virulence detoxification adaptation |
| Rv0595c | virulence detoxification adaptation |
| Rv2596  | virulence detoxification adaptation |

|         |                                     |
|---------|-------------------------------------|
| Rv2602  | virulence detoxification adaptation |
| Rv2759c | virulence detoxification adaptation |
| Rv2872  | virulence detoxification adaptation |
| Rv3320c | virulence detoxification adaptation |
| Rv3384c | virulence detoxification adaptation |
| Rv3408  | virulence detoxification adaptation |
| Rv3697c | virulence detoxification adaptation |
| Rv0627  | virulence detoxification adaptation |
| Rv0656c | virulence detoxification adaptation |
| Rv0661c | virulence detoxification adaptation |
| Rv0665  | virulence detoxification adaptation |
| Rv0960  | virulence detoxification adaptation |
| Rv3082c | virulence detoxification adaptation |
| Rv0167  | virulence detoxification adaptation |
| Rv0168  | virulence detoxification adaptation |
| Rv0587  | virulence detoxification adaptation |
| Rv0588  | virulence detoxification adaptation |
| Rv1964  | virulence detoxification adaptation |
| Rv1965  | virulence detoxification adaptation |
| Rv3501c | virulence detoxification adaptation |
| Rv3500c | virulence detoxification adaptation |
