# Supplementary material
Source: PubMed Central journal article supplement (PMC4390261)
Supplement: supp_M114.045922_mcp.M114.045922-9.pdf [file supp_M114.045922_mcp.M114.045922-9.pdf]

**Supplemental Table S8. Complete list of KEGG pathways in the identified succinylated proteins.**

mtu01100 Metabolic pathways - Mycobacterium tuberculosis H37Rv (222)

|                 |             |       |                                                                                                                                                                                                                                                                                                                |
|-----------------|-------------|-------|----------------------------------------------------------------------------------------------------------------------------------------------------------------------------------------------------------------------------------------------------------------------------------------------------------------|
| ncbi-gi:1560714 | mtu:Rv0002  | dnaN  | DNA polymerase III (beta chain) DnaN (DNA nucleotidyltransferase)                                                                                                                                                                                                                                              |
| ncbi-gi:1560720 | mtu:Rv0066c | icd2  | Probable isocitrate dehydrogenase [NADP] Icd2 (oxalosuccinate decarboxylase) (IDH) (NADP+-specific ICDH) (IDP)                                                                                                                                                                                                 |
| ncbi-gi:1560727 | mtu:Rv0131c | fadE1 | Probable acyl-CoA dehydrogenase FadE1                                                                                                                                                                                                                                                                          |
| ncbi-gi:1560729 | mtu:Rv0154c | fadE2 | Probable acyl-CoA dehydrogenase FadE2                                                                                                                                                                                                                                                                          |
| ncbi-gi:1560729 | mtu:Rv0155  | pntAa | Probable N catalytic part] (pyridine nucleotide transhydrogenase subunit alpha) (nicotinamide nucleotide transhydrogenase subunit alpha)                                                                                                                                                                       |
| ncbi-gi:1560733 | mtu:Rv0189c | ilvD  | Probable dihydroxy-acid dehydrogenase IlvD (dad)                                                                                                                                                                                                                                                               |
| ncbi-gi:1560735 | mtu:Rv0211  | pckA  | Probable iron-regulated phosphoenolpyruvate carboxykinase [GTP] PckA (phosphoenolpyruvate carboxylase) (PEPCK)(pep carboxykinase)                                                                                                                                                                              |
| ncbi-gi:1560736 | mtu:Rv0222  | echA1 | Probable enoyl-CoA hydratase EchA1 (enoyl hydrase) (unsaturated acyl-CoA hydratase) (crotonase)                                                                                                                                                                                                                |
| ncbi-gi:1560737 | mtu:Rv0231  | fadE4 | Probable acyl-CoA dehydrogenase FadE4                                                                                                                                                                                                                                                                          |
| ncbi-gi:5711670 | mtu:Rv0234c | gabD1 | Succinate-semialdehyde dehydrogenase [NADP+] dependent (SSDH) GabD1                                                                                                                                                                                                                                            |
| ncbi-gi:1560738 | mtu:Rv0242c | fabG4 | Probable 3-oxoacyl-[acyl-carrier protein] reductase FabG4 (3-ketoacyl-acyl carrier protein reductase)                                                                                                                                                                                                          |
| ncbi-gi:1560738 | mtu:Rv0243  | fadA2 | Probable acetyl-CoA acyltransferase FadA2 (3-ketoacyl-CoA thiolase) (beta-ketothiolase)                                                                                                                                                                                                                        |
| ncbi-gi:1560738 | mtu:Rv0247c |       | Probable succinate dehydrogenase [iron-sulfur subunit] (succinic dehydrogenase)                                                                                                                                                                                                                                |
| ncbi-gi:1560738 | mtu:Rv0248c |       | Probable succinate dehydrogenase [iron-sulfur subunit] (succinic dehydrogenase)                                                                                                                                                                                                                                |
| ncbi-gi:1560747 | mtu:Rv0334  | rmlA  | Alpha-D-glucose-1-phosphate thymidyllyltransferase RmlA (dTDP-glucose synthase) (dTDP-glucose pyrophosphorylase)                                                                                                                                                                                               |
| ncbi-gi:1560749 | mtu:Rv0357c | purA  | Probable adenylosuccinate synthetase PurA (imp--aspartate ligase) (ADSS) (ampsase)                                                                                                                                                                                                                             |
| ncbi-gi:1560750 | mtu:Rv0363c | fbA   | Probable fructose-bisphosphate aldolase Fba                                                                                                                                                                                                                                                                    |
| ncbi-gi:1560753 | mtu:Rv0389  | purT  | Probable phosphoribosylglycinamide formyltransferase 2 PurT (GART 2) (gar transformylase 2) (5'-phosphoribosylglycinamide transformylase 2) (formate-dependent gar transformylase)                                                                                                                             |
| ncbi-gi:1560753 | mtu:Rv0391  | metZ  | Probable O-succinylhomoserine sulfhydrylase MetZ (OSH sulfhydrylase)                                                                                                                                                                                                                                           |
| ncbi-gi:1560754 | mtu:Rv0400c | fadE7 | Acyl-CoA dehydrogenase FadE7                                                                                                                                                                                                                                                                                   |
| ncbi-gi:1560754 | mtu:Rv0408  | pta   | Probable phosphate acetyltransferase Pta (phosphotransacetylase)                                                                                                                                                                                                                                               |
| ncbi-gi:1560756 | mtu:Rv0422c | thiD  | Probable phosphomethylpyrimidine kinase ThiD (HMP-phosphate kinase) (HMP-P kinase)                                                                                                                                                                                                                             |
| ncbi-gi:1560756 | mtu:Rv0423c | thiC  | Probable thiamine biosynthesis protein ThiC                                                                                                                                                                                                                                                                    |
| ncbi-gi:1560760 | mtu:Rv0462  | lpdC  | Dihydrolipoamide dehydrogenase LpdC (lipoamide reductase (NADH)) (lipoyl dehydrogenase) (dihydrolipoyl dehydrogenase) (diaphorase)                                                                                                                                                                             |
| ncbi-gi:5711673 | mtu:Rv0467  | icl1  | Isocitrate lyase Icl (isocitrase) (isocitratase)                                                                                                                                                                                                                                                               |
| ncbi-gi:1560760 | mtu:Rv0468  | fadB2 | 3-hydroxybutyryl-CoA dehydrogenase FadB2 (beta-hydroxybutyryl-CoA dehydrogenase) (BHBD)                                                                                                                                                                                                                        |
| ncbi-gi:1560762 | mtu:Rv0482  | murB  | Probable UDP-N-acetylenolpyruvoylglucosamine reductase MurB (UDP-N-acetylmuramate dehydrogenase)                                                                                                                                                                                                               |
| ncbi-gi:5711673 | mtu:Rv0489  | gpm1  | Probable phosphoglycerate mutase 1 Gpm1 (phosphoglyceromutase) (PGAM) (BPG-dependent PGAM)                                                                                                                                                                                                                     |
| ncbi-gi:1560764 | mtu:Rv0500  | proC  | Probable pyrroline-5-carboxylate reductase ProC (P5CR) (P5C reductase)                                                                                                                                                                                                                                         |
| ncbi-gi:1560765 | mtu:Rv0510  | hemC  | Probable porphobilinogen deaminase HemC (PBG) (hydroxymethylbilane synthase) (HMBS) (pre-uroporphyrinogen synthase)                                                                                                                                                                                            |
| ncbi-gi:5711674 | mtu:Rv0511  | hemD  | Probable uroporphyrin-III C-methyltransferase HemD (uroporphyrinogen III methylase) (urogen III methylase) (SUMT) (urogen III methylase) (UROM)                                                                                                                                                                |
| ncbi-gi:1560768 | mtu:Rv0548c | menB  | Naphthoate synthase MenB (dihydroxynaphthoic acid synthetase) (DHNA synthetase)                                                                                                                                                                                                                                |
| ncbi-gi:1560777 | mtu:Rv0632c | echA3 | Probable enoyl-CoA hydratase EchA3 (enoyl hydrase) (unsaturated acyl-CoA hydratase) (crotonase)                                                                                                                                                                                                                |
| ncbi-gi:1560780 | mtu:Rv0667  | rpoB  | DNA-directed RNA polymerase (beta chain) RpoB (transcriptase beta chain) (RNA polymerase beta subunit)                                                                                                                                                                                                         |
| ncbi-gi:1560780 | mtu:Rv0668  | rpoC  | DNA-directed RNA polymerase (beta' chain) RpoC (transcriptase beta' chain) (RNA polymerase beta' subunit)                                                                                                                                                                                                      |
| ncbi-gi:5711676 | mtu:Rv0675  | echA5 | Probable enoyl-CoA hydratase EchA5 (enoyl hydrase) (unsaturated acyl-CoA hydratase) (crotonase)                                                                                                                                                                                                                |
| ncbi-gi:1560787 | mtu:Rv0733  | adk   | Adenylyate kinase Adk (ATP-AMP transphosphorylase)                                                                                                                                                                                                                                                             |
| ncbi-gi:1560789 | mtu:Rv0753c | mmsA  | Probable methylmalonate-semialdehyde dehydrogenase MmsA (methylmalonic acid semialdehyde dehydrogenase) (MMSDH)                                                                                                                                                                                                |
| ncbi-gi:1560790 | mtu:Rv0760c |       | hypothetical protein                                                                                                                                                                                                                                                                                           |
| ncbi-gi:5711677 | mtu:Rv0761c | adhB  | Possible zinc-containing alcohol dehydrogenase NAD dependent AdhB                                                                                                                                                                                                                                              |
| ncbi-gi:1560791 | mtu:Rv0772  | purD  | Probable phosphoribosylamine-glycine ligase PurD (GARS) (glycinamide ribonucleotide synthetase) (phosphoribosylglycinamide synthetase) (5'-phosphoribosylglycinamide synthetase)                                                                                                                               |
| ncbi-gi:1560791 | mtu:Rv0773c | ggtA  | Probable bifunctional acylase GgtA: cephalosporin acylase (GL-7ACA acylase) + gamma-glutamyltranspeptidase (GGT)                                                                                                                                                                                               |
| ncbi-gi:5711678 | mtu:Rv0794c | lpdB  | Probable oxidoreductase                                                                                                                                                                                                                                                                                        |
| ncbi-gi:1560794 | mtu:Rv0809  | purM  | Probable phosphoribosylformylglycinamide CYCLO-ligase PurM (AIRS) (phosphoribosyl-aminoimidazole synthetase) (air synthase)                                                                                                                                                                                    |
| ncbi-gi:1560795 | mtu:Rv0815c | cysA2 | Probable thiosulfate sulfurtransferase CysA2 (rhodanese-like protein) (thiosulfate cyanide transsulfurase) (thiosulfate thiotransferase)                                                                                                                                                                       |
| ncbi-gi:1560799 | mtu:Rv0858c | dapC  | Probable N-succinyldiaminopimelate aminotransferase DapC (DAP-at)                                                                                                                                                                                                                                              |
| ncbi-gi:1560799 | mtu:Rv0859  | fadA  | Possible acyl-CoA thiolase FadA                                                                                                                                                                                                                                                                                |
| ncbi-gi:1560800 | mtu:Rv0860  | fadB  | Probable fatty oxidation protein FadB                                                                                                                                                                                                                                                                          |
| ncbi-gi:1560802 | mtu:Rv0884c | serC  | Possible phosphoserine aminotransferase SerC (PSAT)                                                                                                                                                                                                                                                            |
| ncbi-gi:1560802 | mtu:Rv0889c | citA  | Probable citrate synthase II CitA                                                                                                                                                                                                                                                                              |
| ncbi-gi:1560803 | mtu:Rv0896  | gltA2 | Probable citrate synthase I GltA2                                                                                                                                                                                                                                                                              |
| ncbi-gi:1560804 | mtu:Rv0905  | echA6 | Possible enoyl-CoA hydratase EchA6 (enoyl hydrase) (unsaturated acyl-CoA hydratase) (crotonase)                                                                                                                                                                                                                |
| ncbi-gi:1560808 | mtu:Rv0946c | pgi   | Probable glucose-6-phosphate isomerase Pgi (GPI) (phosphoglucose isomerase) (phosphohexose isomerase) (phi)                                                                                                                                                                                                    |
| ncbi-gi:1560809 | mtu:Rv0951  | sucC  | Probable succinyl-CoA synthetase (beta chain) SucC (SCS-beta)                                                                                                                                                                                                                                                  |
| ncbi-gi:1560809 | mtu:Rv0952  | sucD  | Probable succinyl-CoA synthetase (alpha chain) SucD (SCS-alpha)                                                                                                                                                                                                                                                |
| ncbi-gi:1560809 | mtu:Rv0957  | purH  | Probable bifunctional purine biosynthesis protein PurH: phosphoribosylaminoimidazolecarboxamide formyltransferase (AICAR transformylase) (5'-phosphoribosyl-5-aminoimidazole-4-carboxamide formyltransferase) + inosinemonophosphate cyclohydrolase (imp cyclohydrolase) (inosinicase) (imp synthetase) (ATIC) |
| ncbi-gi:1560811 | mtu:Rv0971c | echA7 | Probable enoyl-CoA hydratase EchA7 (enoyl hydrase) (unsaturated acyl-CoA hydratase) (crotonase)                                                                                                                                                                                                                |
| ncbi-gi:1560815 | mtu:Rv1017c | prsA  | Probable ribose-phosphate pyrophosphokinase PrsA (phosphoribosyl pyrophosphate synthetase) (PRPP synthetase)                                                                                                                                                                                                   |
| ncbi-gi:1560815 | mtu:Rv1018c | glmU  | Probable UDP-N-acetylglucosamine pyrophosphorylase GlmU                                                                                                                                                                                                                                                        |
| ncbi-gi:1560816 | mtu:Rv1023  | eno   | Probable enolase Eno                                                                                                                                                                                                                                                                                           |
| ncbi-gi:1560821 | mtu:Rv1070c | echA8 | Probable enoyl-CoA hydratase EchA8 (enoyl hydrase) (unsaturated acyl-CoA hydratase) (crotonase)                                                                                                                                                                                                                |
| ncbi-gi:1560821 | mtu:Rv1071c | echA9 | Possible enoyl-CoA hydratase EchA9 (enoyl hydrase) (unsaturated acyl-CoA hydratase) (crotonase)                                                                                                                                                                                                                |
| ncbi-gi:1560821 | mtu:Rv1074c | fadA3 | Probable beta-ketoacyl CoA thiolase FadA3                                                                                                                                                                                                                                                                      |
| ncbi-gi:5711682 | mtu:Rv1077  | cbs   | Probable cystathionine beta-synthase Cbs (serine sulfhydrase) (beta-thionase) (hemoprotein H-450)                                                                                                                                                                                                              |
| ncbi-gi:1560821 | mtu:Rv1079  | metB  | Cystathionine gamma-synthase MetB (CGS) (O-succinylhomoserine [thiol]-lyase)                                                                                                                                                                                                                                   |
| ncbi-gi:4488247 | mtu:Rv1093  | glyA1 | Serine hydroxymethyltransferase 1 GlyA1                                                                                                                                                                                                                                                                        |
| ncbi-gi:1560823 | mtu:Rv1098c | fum   | Probable fumarase Fum (fumarate hydratase)                                                                                                                                                                                                                                                                     |
| ncbi-gi:4488247 | mtu:Rv1099c | glpX  | Fructose 1,6-bisphosphatase GlpX                                                                                                                                                                                                                                                                               |
| ncbi-gi:5711682 | mtu:Rv1110  | lytB2 | Probable LYTB-related protein LytB2                                                                                                                                                                                                                                                                            |
| ncbi-gi:5711683 | mtu:Rv1121  | zwf1  | Probable glucose-6-phosphate 1-dehydrogenase Zwf1 (G6PD)                                                                                                                                                                                                                                                       |
| ncbi-gi:1560826 | mtu:Rv1122  | gnd2  | Probable 6-phosphogluconate dehydrogenase,decarboxylating Gnd2                                                                                                                                                                                                                                                 |
| ncbi-gi:1560827 | mtu:Rv1133c | metE  | Probable 5-methyltetrahydropteroyltrimethylglutamate-homocysteine methyltransferase MetE (methionine synthase, vitamin-B12 independent isozyme)                                                                                                                                                                |
| ncbi-gi:1560828 | mtu:Rv1143  | mcr   | Probable alpha-methylacyl-CoA racemase Mcr (2-methylacyl-CoA racemase) (2-arylpropionyl-CoA epimerase )                                                                                                                                                                                                        |
| ncbi-gi:1560834 | mtu:Rv1201c | dapD  | Tetrahydridipicolinate N-succinyltransferase DapD                                                                                                                                                                                                                                                              |
| ncbi-gi:1560838 | mtu:Rv1240  | mdh   | Probable malate dehydrogenase Mdh                                                                                                                                                                                                                                                                              |
| ncbi-gi:1560843 | mtu:Rv1295  | thrC  | Threonine synthase ThrC (ts)                                                                                                                                                                                                                                                                                   |
| ncbi-gi:1560844 | mtu:Rv1306  | atpF  | Probable ATP synthase B chain AtpF                                                                                                                                                                                                                                                                             |
| ncbi-gi:1560844 | mtu:Rv1307  | atpH  | Probable ATP synthase delta chain AtpH                                                                                                                                                                                                                                                                         |
| ncbi-gi:1560844 | mtu:Rv1308  | atpA  | Probable ATP synthase alpha chain AtpA                                                                                                                                                                                                                                                                         |
| ncbi-gi:1560844 | mtu:Rv1309  | atpG  | Probable ATP synthase gamma chain AtpG                                                                                                                                                                                                                                                                         |
| ncbi-gi:1560845 | mtu:Rv1310  | atpD  | Probable ATP synthase beta chain AtpD                                                                                                                                                                                                                                                                          |

|                 |            |        |                                                                                                                                                                                                                                             |
|-----------------|------------|--------|---------------------------------------------------------------------------------------------------------------------------------------------------------------------------------------------------------------------------------------------|
| ncbi-gi:1560845 | mtu:Rv1311 | atpC   | Probable ATP synthase epsilon chain AtpC                                                                                                                                                                                                    |
| ncbi-gi:1560845 | mtu:Rv1315 | murA   | Probable UDP-N-acetylglucosamine 1-carboxyvinyltransferase MurA                                                                                                                                                                             |
| ncbi-gi:1560846 | mtu:Rv1323 | fadA4  | Probable acetyl-CoA acetyltransferase FadA4 (acetoacetyl-CoA thiolase)                                                                                                                                                                      |
| ncbi-gi:1560846 | mtu:Rv1328 | glgP   | Probable glycogen phosphorylase GlgP                                                                                                                                                                                                        |
| ncbi-gi:1560849 | mtu:Rv1350 | fabG2  | Probable 3-oxoacyl-[acyl-carrier protein] reductase FabG2 (3-ketoacyl-acyl carrier protein reductase)                                                                                                                                       |
| ncbi-gi:1560851 | mtu:Rv1379 | pyrR   | Probable pyrimidine operon regulatory protein PyrR                                                                                                                                                                                          |
| ncbi-gi:1560852 | mtu:Rv1380 | pyrB   | Probable aspartate carbamoyltransferase PyrB (ATCase) (aspartate transcarbamylase)                                                                                                                                                          |
| ncbi-gi:1560852 | mtu:Rv1383 | carA   | Probable carbamoyl-phosphate synthase small chain CarA (carbamoyl-phosphate synthetase glutamine chain)                                                                                                                                     |
| ncbi-gi:5711685 | mtu:Rv1384 | carB   | Probable carbamoyl-phosphate synthase large chain CarB (carbamoyl-phosphate synthetase ammonia chain)                                                                                                                                       |
| ncbi-gi:1560853 | mtu:Rv1391 | dfp    | Probable DNA/pantothenate metabolism flavoprotein homolog Dfp                                                                                                                                                                               |
| ncbi-gi:1560853 | mtu:Rv1392 | metK   | Probable S-adenosylmethionine synthetase MetK (mat) (AdoMet synthetase) (methionine adenosyltransferase)                                                                                                                                    |
| ncbi-gi:4488247 | mtu:Rv1416 | ribH   | Probable riboflavin synthase beta chain RibH (6,7-dimethyl-8-ribityllumazine synthase) (DMRL synthase) (lumazine synthase)                                                                                                                  |
| ncbi-gi:1560857 | mtu:Rv1436 | gap    | Probable glyceraldehyde 3-phosphate dehydrogenase Gap (GAPDH)                                                                                                                                                                               |
| ncbi-gi:1560857 | mtu:Rv1437 | pgk    | Probable phosphoglycerate kinase Pgk                                                                                                                                                                                                        |
| ncbi-gi:1560857 | mtu:Rv1438 | tpi    | Probable triosephosphate isomerase Tpi (TIM)                                                                                                                                                                                                |
| ncbi-gi:1560858 | mtu:Rv1448 | tal    | Probable transaldolase Tal                                                                                                                                                                                                                  |
| ncbi-gi:1560858 | mtu:Rv1449 | tkt    | Transketolase Tkt (TK)                                                                                                                                                                                                                      |
| ncbi-gi:1560861 | mtu:Rv1475 | acn    | Probable iron-regulated aconitate hydratase Acn (citrate hydro-lyase) (aconitase)                                                                                                                                                           |
| ncbi-gi:1560863 | mtu:Rv1492 | mutA   | Probable methylmalonyl-CoA mutase small subunit MutA (MCM)                                                                                                                                                                                  |
| ncbi-gi:1560863 | mtu:Rv1493 | mutB   | Probable methylmalonyl-CoA mutase large subunit MutB (MCM)                                                                                                                                                                                  |
| ncbi-gi:1560869 | mtu:Rv1559 | ilvA   | Probable threonine dehydratase IlvA                                                                                                                                                                                                         |
| ncbi-gi:1560873 | mtu:Rv1596 | nadC   | Probable nicotinate-nucleotide pyrophosphatase NadC                                                                                                                                                                                         |
| ncbi-gi:1560873 | mtu:Rv1601 | hisB   | Probable imidazole glycerol-phosphate dehydratase HisB                                                                                                                                                                                      |
| ncbi-gi:1560874 | mtu:Rv1603 | hisA   | Probable phosphoribosylformimino-5-aminoimidazole carboxamide ribotide isomerase HisA                                                                                                                                                       |
| ncbi-gi:1560874 | mtu:Rv1611 | trpC   | Probable indole-3-glycerol phosphate synthase TrpC                                                                                                                                                                                          |
| ncbi-gi:1560875 | mtu:Rv1617 | pykA   | Probable pyruvate kinase PykA                                                                                                                                                                                                               |
| ncbi-gi:1560876 | mtu:Rv1629 | polA   | Probable DNA polymerase I PolA                                                                                                                                                                                                              |
| ncbi-gi:1560876 | mtu:Rv1631 | coaE   | Probable dephospho-CoA kinase CoaE (dephosphocoenzyme a kinase)                                                                                                                                                                             |
| ncbi-gi:1560879 | mtu:Rv1654 | argB   | Probable acetylglutamate kinase ArgB                                                                                                                                                                                                        |
| ncbi-gi:1560879 | mtu:Rv1655 | argD   | Probable acetylornithine aminotransferase ArgD                                                                                                                                                                                              |
| ncbi-gi:1560879 | mtu:Rv1656 | argF   | Probable ornithine carbamoyltransferase, anabolic ArgF                                                                                                                                                                                      |
| ncbi-gi:1560883 | mtu:Rv1695 | ppnK   | Inorganic polyphosphate/ATP-NAD kinase PpnK (poly(P)/ATP NAD kinase)                                                                                                                                                                        |
| ncbi-gi:1560883 | mtu:Rv1699 | pyrG   | Probable CTP synthase PyrG                                                                                                                                                                                                                  |
| ncbi-gi:4488247 | mtu:Rv1703 |        | Probable catechol-O-methyltransferase                                                                                                                                                                                                       |
| ncbi-gi:5711690 | mtu:Rv1731 | gabD2  | Possible succinate-semialdehyde dehydrogenase [NADP+] dependent (SSDH) GabD2                                                                                                                                                                |
| ncbi-gi:1560896 | mtu:Rv1832 | gcvB   | Probable glycine dehydrogenase GcvB (glycine decarboxylase) (glycine cleavage system P-protein)                                                                                                                                             |
| ncbi-gi:1560897 | mtu:Rv1837 | glcB   | Malate synthase G GlcB                                                                                                                                                                                                                      |
| ncbi-gi:1560898 | mtu:Rv1843 | guaB1  | Probable inosine-5'-monophosphate dehydrogenase GuaB1 (imp dehydrogenase) (IMPDH) (IMPD)                                                                                                                                                    |
| ncbi-gi:1560900 | mtu:Rv1872 | lldD2  | Possible L-lactate dehydrogenase (cytochrome) LldD2                                                                                                                                                                                         |
| ncbi-gi:1560904 | mtu:Rv1908 | katG   | Catalase-peroxidase-peroxynitritase T KatG                                                                                                                                                                                                  |
| ncbi-gi:1560913 | mtu:Rv2002 | fabG3  | Possible 20-beta-hydroxysteroid dehydrogenase FabG3 (cortisone reductase) ((R)-20-hydroxysteroid dehydrogenase)                                                                                                                             |
| ncbi-gi:1560916 | mtu:Rv2029 | pfkB   | 6-phosphofructokinase PfkB (phosphohexokinase) (phosphofructokinase)                                                                                                                                                                        |
| ncbi-gi:1560919 | mtu:Rv2054 |        | hypothetical protein                                                                                                                                                                                                                        |
| ncbi-gi:1560925 | mtu:Rv2121 | hisG   | ATP phosphoribosyltransferase HisG                                                                                                                                                                                                          |
| ncbi-gi:1560931 | mtu:Rv2178 | aroG   | 3-deoxy-D-arabino-heptulosonate 7-phosphate synthase AroG (DAHP synthetase, phenylalanine-repressible)                                                                                                                                      |
| ncbi-gi:1560931 | mtu:Rv2182 |        | 1-acylglycerol-3-phosphate O-acyltransferase                                                                                                                                                                                                |
| ncbi-gi:1560932 | mtu:Rv2187 | fadD15 | Long-chain-fatty-acid-CoA ligase FadD15 (fatty-acid-CoA synthetase) (fatty-acid-CoA synthase)                                                                                                                                               |
| ncbi-gi:1560933 | mtu:Rv2195 | qcrA   | Probable rieske iron-sulfur protein QcrA                                                                                                                                                                                                    |
| ncbi-gi:1560933 | mtu:Rv2196 | qcrB   | Probable ubiquinol-cytochrome C reductase QcrB (cytochrome B subunit)                                                                                                                                                                       |
| ncbi-gi:1560933 | mtu:Rv2200 | ctaC   | Probable transmembrane cytochrome C oxidase (subunit II) CtaC                                                                                                                                                                               |
| ncbi-gi:1560933 | mtu:Rv2202 | adoK   | Adenosine kinase                                                                                                                                                                                                                            |
| ncbi-gi:1560934 | mtu:Rv2210 | ilvE   | Branched-chain amino acid transaminase IlvE                                                                                                                                                                                                 |
| ncbi-gi:1560934 | mtu:Rv2211 | gcvT   | Probable aminomethyltransferase GcvT (glycine cleavage system T protein)                                                                                                                                                                    |
| ncbi-gi:1560935 | mtu:Rv2213 | pepB   | Probable aminopeptidase PepB                                                                                                                                                                                                                |
| ncbi-gi:1560935 | mtu:Rv2215 | dlaT   | DlaT, dihydrolipoamide acyltransferase, E2 component of pyruvate dehydrogenase                                                                                                                                                              |
| ncbi-gi:1560935 | mtu:Rv2220 | glnA1  | Glutamine synthetase GlnA1 (glutamine synthase) (GS-I)                                                                                                                                                                                      |
| ncbi-gi:1560935 | mtu:Rv2222 | glnA2  | Probable glutamine synthetase GlnA2 (glutamine synthase) (GS-II)                                                                                                                                                                            |
| ncbi-gi:4488247 | mtu:Rv2241 | aceE   | Pyruvate dehydrogenase E1 component AceE (pyruvate decarboxylase) (pyruvate dehydrogenase) (pyruvic dehydrogenase)                                                                                                                          |
| ncbi-gi:1560943 | mtu:Rv2296 |        | Probable haloalkane dehalogenase                                                                                                                                                                                                            |
| ncbi-gi:5711697 | mtu:Rv2334 | cysK1  | Cysteine synthase a CysK1 (O-acetylserine sulfhydrylase A) (O-acetylserine (thiol)-lyase A) (CSASE A)                                                                                                                                       |
| ncbi-gi:1560952 | mtu:Rv2391 | sirA   | Ferredoxin-dependent sulfite reductase SirA                                                                                                                                                                                                 |
| ncbi-gi:1560955 | mtu:Rv2419 | gpgP   | Glucosyl-3-phosphoglycerate phosphatase GpgP                                                                                                                                                                                                |
| ncbi-gi:5711699 | mtu:Rv2438 | nadE   | Glutamine-dependent NAD(+) synthetase NadE (NAD(+)) synthase [glutamine-hydrolysing])                                                                                                                                                       |
| ncbi-gi:1560959 | mtu:Rv2454 |        | Probable oxidoreductase (beta subunit)                                                                                                                                                                                                      |
| ncbi-gi:1560959 | mtu:Rv2455 |        | Probable oxidoreductase (alpha subunit)                                                                                                                                                                                                     |
| ncbi-gi:5711699 | mtu:Rv2465 | rpiB   | Ribose-5-phosphate isomerase                                                                                                                                                                                                                |
| ncbi-gi:5711699 | mtu:Rv2467 | pepN   | Probable aminopeptidase N PepN (Lysyl aminopeptidase) (LYS-AP) (alanine aminopeptidase)                                                                                                                                                     |
| ncbi-gi:1560961 | mtu:Rv2476 | gdh    | Probable NAD-dependent glutamate dehydrogenase Gdh (NAD-Gdh) (NAD-dependent glutamic dehydrogenase)                                                                                                                                         |
| ncbi-gi:1560963 | mtu:Rv2495 | bkdC   | Probable branched-chain keto acid dehydrogenase E2 component BkdC                                                                                                                                                                           |
| ncbi-gi:1560963 | mtu:Rv2501 | accA1  | Probable acetyl-/propionyl-coenzyme A carboxylase alpha chain (alpha subunit) AccA1: biotin carboxylase + biotin carboxyl carrier protein (BCCP)                                                                                            |
| ncbi-gi:1560963 | mtu:Rv2502 | accD1  | Probable acetyl-/propionyl-CoA carboxylase (beta subunit) AccD1                                                                                                                                                                             |
| ncbi-gi:1560966 | mtu:Rv2524 | fas    | Probable fatty acid synthase Fas (fatty acid synthetase)                                                                                                                                                                                    |
| ncbi-gi:1560967 | mtu:Rv2537 | aroD   | 3-dehydroquinate dehydratase AroD (AROQ) (3-dehydroquinase) (type II dhqase)                                                                                                                                                                |
| ncbi-gi:1560967 | mtu:Rv2538 | aroB   | 3-dehydroquinate synthase AroB                                                                                                                                                                                                              |
| ncbi-gi:1560967 | mtu:Rv2540 | aroF   | Probable chorismate synthase AroF (5-enolpyruvylshikimate-3-phosphate phospholyase)                                                                                                                                                         |
| ncbi-gi:1560972 | mtu:Rv2589 | gabT   | 4-aminobutyrate aminotransferase GabT (gamma-amino-N-butyrate transaminase) (GABA transaminase) (glutamate:succinic semialdehyde transaminase) (GABA aminotransferase) (GABA-at)                                                            |
| ncbi-gi:1560974 | mtu:Rv2607 | pdxH   | Probable pyridoxamine 5'-phosphate oxidase PdxH (PNP/PMP oxidase) (pyridoxinephosphate oxidase) (PNPOX) (pyridoxine 5'-phosphate oxidase)                                                                                                   |
| ncbi-gi:1560981 | mtu:Rv2679 | echA15 | Probable enoyl-CoA hydratase EchA15 (enoyl hydrase) (unsaturated acyl-CoA hydratase) (crotonase)                                                                                                                                            |
| ncbi-gi:1560983 | mtu:Rv2697 | dut    | Probable deoxyuridine 5'-triphosphate nucleotidohydrolase Dut (dUTPase) (dUTP pyrophosphatase) (deoxyuridine 5'-triphosphatase) (dUTP diphosphatase) (deoxyuridine-triphosphatase)                                                          |
| ncbi-gi:1560985 | mtu:Rv2713 | sthA   | Probable soluble pyridine nucleotide transhydrogenase SthA (STH) (NAD(P)(+)) transhydrogenase [B-specific]) (nicotinamide nucleotide transhydrogenase)                                                                                      |
| ncbi-gi:1560986 | mtu:Rv2726 | dapF   | Probable diaminopimelate epimerase DapF (DAP epimerase)                                                                                                                                                                                     |
| ncbi-gi:1560989 | mtu:Rv2753 | dapA   | Probable dihydrodipicolinate synthase DapA (DHDPS) (dihydrodipicolinate synthetase)                                                                                                                                                         |
| ncbi-gi:1560990 | mtu:Rv2765 |        | Probable alanine rich hydrolase                                                                                                                                                                                                             |
| ncbi-gi:1560991 | mtu:Rv2773 | dapB   | Dihydrodipicolinate reductase DapB (DHPR)                                                                                                                                                                                                   |
| ncbi-gi:1560991 | mtu:Rv2780 | ald    | Secreted L-alanine dehydrogenase Ald (40 kDa antigen) (TB43)                                                                                                                                                                                |
| ncbi-gi:1560992 | mtu:Rv2786 | ribF   | Probable bifunctional FAD synthetase/riboflavin biosynthesis protein RibF: riboflavin kinase (flavokinase) + FMN adenylyltransferase (FAD pyrophosphorylase) (FAD synthetase)(FAD diphosphorylase) (flavin adenine dinucleotide synthetase) |

|                             |        |                                                                                                                                                                                                                                                             |
|-----------------------------|--------|-------------------------------------------------------------------------------------------------------------------------------------------------------------------------------------------------------------------------------------------------------------|
| ncbi-gi:4488247;mtu:Rv2790c | Itp1   | Probable lipid-transfer protein Itp1                                                                                                                                                                                                                        |
| ncbi-gi:1561000;mtu:Rv2868c | gcpE   | Probable GcpE protein                                                                                                                                                                                                                                       |
| ncbi-gi:1561010;mtu:Rv2965c | kdtB   | Probable phosphopantetheine adenylyltransferase KdtB (pantetheine-phosphate adenylyltransferase) (PPAT) (dephospho-CoA pyrophosphorylase)                                                                                                                   |
| ncbi-gi:1561010;mtu:Rv2967c | pca    | Probable pyruvate carboxylase Pca (pyruvic carboxylase)                                                                                                                                                                                                     |
| ncbi-gi:5711704;mtu:Rv2992c | gltS   | Glutamyl-tRNA synthetase GltS (glutamate--tRNA ligase) (glutamyl-tRNA synthase) (GLURS)                                                                                                                                                                     |
| ncbi-gi:1561013;mtu:Rv2995c | leuB   | Probable 3-isopropylmalate dehydrogenase LeuB (beta-IPM dehydrogenase) (IMDH) (3-IPM-DH)                                                                                                                                                                    |
| ncbi-gi:5711704;mtu:Rv2996c | serA1  | Probable D-3-phosphoglycerate dehydrogenase SerA1 (PGDH)                                                                                                                                                                                                    |
| ncbi-gi:4488247;mtu:Rv3001c | ilvC   | Probable KETOL-acid reductoisomerase IlvC (acetohydroxy-acid isomeroeductase) (alpha-keto-beta-hydroxylacil reductoisomerase)                                                                                                                               |
| ncbi-gi:1561013;mtu:Rv3002c | ilvN   | Probable acetolactate synthase (small subunit) IlvN (acetohydroxy-acid synthase) (AHAS) (ALS)                                                                                                                                                               |
| ncbi-gi:5711704;mtu:Rv3003c | ilvB1  | Acetolactate synthase (large subunit) IlvB1 (acetohydroxy-acid synthase)                                                                                                                                                                                    |
| ncbi-gi:1561014;mtu:Rv3009c | gatB   | Probable glutamyl-tRNA(GLN) amidotransferase (subunit B) GatB (Glu-ADT subunit B)                                                                                                                                                                           |
| ncbi-gi:1561014;mtu:Rv3010c | pfkA   | Probable 6-phosphofructokinase PfkA (phosphohexokinase) (phosphofructokinase)                                                                                                                                                                               |
| ncbi-gi:4488247;mtu:Rv3011c | gatA   | Probable glutamyl-tRNA(GLN) amidotransferase (subunit A) GatA (Glu-ADT subunit A)                                                                                                                                                                           |
| ncbi-gi:5711705;mtu:Rv3048c | nrdF2  | Ribonucleoside-diphosphate reductase (beta chain) NrdF2 (ribonucleotide reductase small subunit) (R2F protein)                                                                                                                                              |
| ncbi-gi:1561018;mtu:Rv3051c | nrdE   | Ribonucleoside-diphosphate reductase (alpha chain) NrdE (ribonucleotide reductase small subunit) (R1F protein)                                                                                                                                              |
| ncbi-gi:1561022;mtu:Rv3086  | adhD   | Probable zinc-type alcohol dehydrogenase AdhD (aldehyde reductase)                                                                                                                                                                                          |
| ncbi-gi:1561027;mtu:Rv3140  | fadE23 | Probable acyl-CoA dehydrogenase FadE23                                                                                                                                                                                                                      |
| ncbi-gi:1561028;mtu:Rv3149  | nuoE   | Probable NADH dehydrogenase I (chain E) NuoE (NADH-ubiquinone oxidoreductase chain E)                                                                                                                                                                       |
| ncbi-gi:1561028;mtu:Rv3150  | nuoF   | Probable NADH dehydrogenase I (chain F) NuoF (NADH-ubiquinone oxidoreductase chain F)                                                                                                                                                                       |
| ncbi-gi:1561035;mtu:Rv3215  | entC   | Probable isochorismate synthase EntC (isochorismate hydroxymutase) (enterochelin biosynthesis)                                                                                                                                                              |
| ncbi-gi:1561036;mtu:Rv3227  | aroA   | 3-phosphoshikimate 1-carboxyvinyltransferase AroA (5-enolpyruvylshikimate-3-phosphate synthase) (EPSP synthase) (EPSPS)                                                                                                                                     |
| ncbi-gi:1561038;mtu:Rv3248c | sahH   | Probable adenosylhomocysteinase SahH (S-adenosyl-L-homocysteine hydrolase) (adohcayase)                                                                                                                                                                     |
| ncbi-gi:1561039;mtu:Rv3255c | manA   | Probable mannose-6-phosphate isomerase ManA (phosphomannose isomerase) (phosphomannoisomerase) (PMI) (phosphohexoisomerase) (phosphohexomutase)                                                                                                             |
| ncbi-gi:5711708;mtu:Rv3264c | manB   | D-alpha-D-mannose-1-phosphate guanylyltransferase ManB (D-alpha-D-heptose-1-phosphate guanylyltransferase)                                                                                                                                                  |
| ncbi-gi:1561041;mtu:Rv3275c | purE   | Probable phosphoribosylaminoimidazole carboxylase catalytic subunit PurE (air carboxylase) (AIRC)                                                                                                                                                           |
| ncbi-gi:1561041;mtu:Rv3276c | purK   | Probable phosphoribosylaminoimidazole carboxylase ATPase subunit PurK (air carboxylase) (AIRC)                                                                                                                                                              |
| ncbi-gi:1561041;mtu:Rv3280  | accD5  | Probable propionyl-CoA carboxylase beta chain 5 AccD5 (pccase) (propanoyl-CoA:carbon dioxide ligase)                                                                                                                                                        |
| ncbi-gi:1561041;mtu:Rv3283  | sseA   | Probable thiosulfate sulfurtransferase SseA (rhodanese) (thiosulfate cyanide transsulfurase) (thiosulfate thiotransferase)                                                                                                                                  |
| ncbi-gi:1561042;mtu:Rv3285  | accA3  | Probable bifunctional protein acetyl-/propionyl-coenzyme A carboxylase (alpha chain) AccA3: biotin carboxylase + biotin carboxyl carrier protein (BCCP)                                                                                                     |
| ncbi-gi:1561045;mtu:Rv3318  | sdhA   | Probable succinate dehydrogenase (flavoprotein subunit) SdhA (succinic dehydrogenase) (fumarate reductase) (fumarate dehydrogenase) (fumaric hydrogenase)                                                                                                   |
| ncbi-gi:1561047;mtu:Rv3339c | icd1   | Probable isocitrate dehydrogenase [NADP] Icd1 (oxalosuccinate decarboxylase) (IDH) (NADP+-specific ICDH) (IDP)                                                                                                                                              |
| ncbi-gi:1561047;mtu:Rv3340  | metC   | Probable O-acetylhomoserine sulphydrylase MetC (homocysteine synthase) (O-acetylhomoserine (thiol)-lyase) (OAH sulphydrylase) (O-acetyl-L-homoserine sulphydrylase)                                                                                         |
| ncbi-gi:1561049;mtu:Rv3356c | folD   | Probable bifunctional protein FolD: methylenetetrahydrofolate dehydrogenase + methenyltetrahydrofolate cyclohydrolase                                                                                                                                       |
| ncbi-gi:1561053;mtu:Rv3396c | guaA   | Probable GMP synthase [glutamine-hydrolyzing] GuaA (glutamine amidotransferase) (GMP synthetase)                                                                                                                                                            |
| ncbi-gi:1561054;mtu:Rv3410c | guaB3  | Probable inosine-5'-monophosphate dehydrogenase GuaB3 (imp dehydrogenase) (inosinic acid dehydrogenase) (inosinate dehydrogenase) (imp oxidoreductase) (inosine-5'-monophosphate oxidoreductase) (IMPDH) (IMPD)                                             |
| ncbi-gi:1561056;mtu:Rv3432c | gadB   | Probable glutamate decarboxylase GadB                                                                                                                                                                                                                       |
| ncbi-gi:1561057;mtu:Rv3436c | glmS   | Probable glucosamine--fructose-6-phosphate aminotransferase [isomerizing] GlmS (hexosephosphate aminotransferase) (D-fructose-6-phosphate amidotransferase) (GFAT) (L-glutamine-D-fructose-6-phosphate amidotransferase) (glucosamine-6-phosphate synthase) |
| ncbi-gi:1561059;mtu:Rv3457c | rpoA   | Probable DNA-directed RNA polymerase (alpha chain) RpoA (transcriptase alpha chain) (RNA polymerase alpha subunit) (DNA-directed RNA nucleotidyltransferase)                                                                                                |
| ncbi-gi:1561065;mtu:Rv3516  | echA19 | Possible enoyl-CoA hydratase EchA19 (enoyl hydrase) (unsaturated acyl-CoA hydratase) (crotonase)                                                                                                                                                            |
| ncbi-gi:1561067;mtu:Rv3535c | hsaG   | Probable acetaldehyde dehydrogenase (acetaldehyde dehydrogenase [acetylating])                                                                                                                                                                              |
| ncbi-gi:1561069;mtu:Rv3556c | fadA6  | Probable acetyl-CoA acetyltransferase FadA6 (acetoacetyl-CoA thiolase)                                                                                                                                                                                      |
| ncbi-gi:5711712;mtu:Rv3566c | nat    | Arylamine N-acetyltransferase Nat (arylamine acetylase)                                                                                                                                                                                                     |
| ncbi-gi:1561070;mtu:Rv3568c | hsaC   | 3,4-DHSA dioxygenase                                                                                                                                                                                                                                        |
| ncbi-gi:1561070;mtu:Rv3569c | hsaD   | 4,9-DHSA hydrolase                                                                                                                                                                                                                                          |
| ncbi-gi:1561070;mtu:Rv3570c | hsaA   | Possible oxidoreductase Possible 3-hydroxy-9,10-seconandrost-1,3,5(10)-triene-9,17-dione hydroxylase                                                                                                                                                        |
| ncbi-gi:1561071;mtu:Rv3581c | ispF   | Probable 2C-methyl-D-erythritol 2,4-cyclodiphosphate synthase IspF (MECPs)                                                                                                                                                                                  |
| ncbi-gi:1561073;mtu:Rv3600c |        | hypothetical protein                                                                                                                                                                                                                                        |
| ncbi-gi:1561074;mtu:Rv3609c | folE   | GTP cyclohydrolase I FolE (GTP-ch-I)                                                                                                                                                                                                                        |
| ncbi-gi:5711713;mtu:Rv3634c | galE1  | UDP-glucose 4-epimerase GalE1 (galactowaldenase) (UDP-galactose 4-epimerase) (uridine diphosphate galactose 4-epimerase) (uridine diphospho-galactose 4-epimerase)                                                                                          |
| ncbi-gi:1561080;mtu:Rv3667  | acs    | Acetyl-coenzyme A synthetase Acs (acetate--CoA ligase) (acetyl-CoA synthetase) (acetyl-CoA synthase) (acyl-activating enzyme) (acetate thiokinase) (acetyl-activating enzyme) (acetate--coenzyme A ligase) (acetyl-coenzyme A synthase)                     |
| ncbi-gi:3454620;mtu:Rv3710  | leuA   | 2-isopropylmalate synthase LeuA (alpha-isopropylmalate synthase) (alpha-IPM synthetase) (IPMS)                                                                                                                                                              |
| ncbi-gi:1561091;mtu:Rv3774  | echA21 | Possible enoyl-CoA hydratase EchA21 (enoyl hydrase) (unsaturated acyl-CoA hydratase) (crotonase)                                                                                                                                                            |
| ncbi-gi:1561097;mtu:Rv3838c | pheA   | Prephenate dehydratase PheA                                                                                                                                                                                                                                 |
| ncbi-gi:1561099;mtu:Rv3858c | gltD   | Probable NADH-dependent glutamate synthase (small subunit) GltD (L-glutamate synthase) (L-glutamate synthetase) (NADH-glutamate synthase) (glutamate synthase (NADH)) (GLTS beta chain) (NADPH-GOGAT)                                                       |
| ncbi-gi:1561099;mtu:Rv3859c | gltB   | Probable ferredoxin-dependent glutamate synthase [NADPH] (large subunit) GltB (L-glutamate synthase) (L-glutamate synthetase) (NADH-glutamate synthase) (glutamate synthase (NADH))(NADPH-GOGAT)                                                            |

mtu01110 Biosynthesis of secondary metabolites - Mycobacterium tuberculosis H37Rv (135)

|                             |       |                                                                                                                                                                                    |
|-----------------------------|-------|------------------------------------------------------------------------------------------------------------------------------------------------------------------------------------|
| ncbi-gi:1560720;mtu:Rv0066c | icd2  | Probable isocitrate dehydrogenase [NADP] Icd2 (oxalosuccinate decarboxylase) (IDH) (NADP+-specific ICDH) (IDP)                                                                     |
| ncbi-gi:1560727;mtu:Rv0131c | fadE1 | Probable acyl-CoA dehydrogenase FadE1                                                                                                                                              |
| ncbi-gi:1560729;mtu:Rv0154c | fadE2 | Probable acyl-CoA dehydrogenase FadE2                                                                                                                                              |
| ncbi-gi:1560733;mtu:Rv0189c | ilvD  | Probable dihydroxy-acid dehydratase IlvD (dad)                                                                                                                                     |
| ncbi-gi:1560735;mtu:Rv0211  | pckA  | Probable iron-regulated phosphoenolpyruvate carboxykinase [GTP] PckA (phosphoenolpyruvate carboxylase) (PEPCK)(pep carboxykinase)                                                  |
| ncbi-gi:1560736;mtu:Rv0222  | echA1 | Probable enoyl-CoA hydratase EchA1 (enoyl hydrase) (unsaturated acyl-CoA hydratase) (crotonase)                                                                                    |
| ncbi-gi:1560736;mtu:Rv0223c |       | Probable aldehyde dehydrogenase                                                                                                                                                    |
| ncbi-gi:1560737;mtu:Rv0231  | fadE4 | Probable acyl-CoA dehydrogenase FadE4                                                                                                                                              |
| ncbi-gi:1560738;mtu:Rv0243  | fadA2 | Probable acetyl-CoA acyltransferase FadA2 (3-ketoacyl-CoA thiolase) (beta-ketothiolase)                                                                                            |
| ncbi-gi:1560738;mtu:Rv0244c | fadE5 | Probable acyl-CoA dehydrogenase FadE5                                                                                                                                              |
| ncbi-gi:1560738;mtu:Rv0247c |       | Probable succinate dehydrogenase [iron-sulfur subunit] (succinic dehydrogenase)                                                                                                    |
| ncbi-gi:1560738;mtu:Rv0248c |       | Probable succinate dehydrogenase [iron-sulfur subunit] (succinic dehydrogenase)                                                                                                    |
| ncbi-gi:1560741;mtu:Rv0271c | fadE6 | Probable acyl-CoA dehydrogenase FadE6                                                                                                                                              |
| ncbi-gi:1560747;mtu:Rv0334  | rmlA  | Alpha-D-glucose-1-phosphate thymidyllyltransferase RmlA (dTDP-glucose synthase) (dTDP-glucose pyrophosphorylase)                                                                   |
| ncbi-gi:1560750;mtu:Rv0363c | fba   | Probable fructose-bisphosphate aldolase Fba                                                                                                                                        |
| ncbi-gi:1560753;mtu:Rv0389  | purT  | Probable phosphoribosylglycinamide formyltransferase 2 PurT (GART 2) (gar transformylase 2) (5'-phosphoribosylglycinamide transformylase 2) (formate-dependent gar transformylase) |
| ncbi-gi:1560760;mtu:Rv0462  | lpdC  | Dihydrolipoamide dehydrogenase LpdC (lipoamide reductase (NADH)) (lipoyl dehydrogenase) (dihydrolipoyl dehydrogenase) (diaphorase)                                                 |
| ncbi-gi:5711673;mtu:Rv0489  | gpm1  | Probable phosphoglycerate mutase 1 Gpm1 (phosphoglyceromutase) (PGAM) (BPG-dependent PGAM)                                                                                         |
| ncbi-gi:1560764;mtu:Rv0500  | proC  | Probable pyrroline-5-carboxylate reductase ProC (P5CR) (P5C reductase)                                                                                                             |
| ncbi-gi:1560765;mtu:Rv0510  | hemC  | Probable porphobilinogen deaminase HemC (PBG) (hydroxymethylbilan synthase) (HMBS) (pre-uroporphyrinogen synthase)                                                                 |
| ncbi-gi:5711674;mtu:Rv0511  | hemD  | Probable uroporphyrin-III C-methyltransferase HemD (uroporphyrinogen III methylase) (urogen III methylase) (SUMT) (urogen III methylase) (UROM)                                    |
| ncbi-gi:1560768;mtu:Rv0548c | menB  | Naphthoate synthase MenB (dihydroxynaphthoic acid synthetase) (DHNA synthetase)                                                                                                    |
| ncbi-gi:1560777;mtu:Rv0632c | echA3 | Probable enoyl-CoA hydratase EchA3 (enoyl hydrase) (unsaturated acyl-CoA hydratase) (crotonase)                                                                                    |
| ncbi-gi:5711676;mtu:Rv0675  | echA5 | Probable enoyl-CoA hydratase EchA5 (enoyl hydrase) (unsaturated acyl-CoA hydratase) (crotonase)                                                                                    |
| ncbi-gi:1560787;mtu:Rv0733  | adk   | Adenylate kinase Adk (ATP-AMP transphosphorylase)                                                                                                                                  |
| ncbi-gi:1560789;mtu:Rv0752c | fadE9 | Probable acyl-CoA dehydrogenase FadE9                                                                                                                                              |
| ncbi-gi:5711677;mtu:Rv0761c | adhB  | Possible zinc-containing alcohol dehydrogenase NAD dependent AdhB                                                                                                                  |

|                             |        |                                                                                                                                                                                                                                                                                                                |
|-----------------------------|--------|----------------------------------------------------------------------------------------------------------------------------------------------------------------------------------------------------------------------------------------------------------------------------------------------------------------|
| ncbi-gi:1560791;mtu:Rv0772  | purD   | Probable phosphoribosylamine--glycine ligase PurD (GARS) (glycinamide ribonucleotide synthetase) (phosphoribosylglycinamide synthetase) (5'-phosphoribosylglycinamide synthetase)                                                                                                                              |
| ncbi-gi:5711678;mtu:Rv0794c | lpdB   | Probable oxidoreductase                                                                                                                                                                                                                                                                                        |
| ncbi-gi:1560794;mtu:Rv0809  | purM   | Probable phosphoribosylformylglycinimidine CYCLO-ligase PurM (AIRS) (phosphoribosyl-aminoimidazole synthetase) (air synthase)                                                                                                                                                                                  |
| ncbi-gi:1560799;mtu:Rv0859  | fadA   | Possible acyl-CoA thiolase FadA                                                                                                                                                                                                                                                                                |
| ncbi-gi:1560800;mtu:Rv0860  | fadB   | Probable fatty oxidation protein FadB                                                                                                                                                                                                                                                                          |
| ncbi-gi:1560801;mtu:Rv0873  | fadE10 | Probable acyl-CoA dehydrogenase FadE10                                                                                                                                                                                                                                                                         |
| ncbi-gi:1560802;mtu:Rv0889c | citA   | Probable citrate synthase II CitA                                                                                                                                                                                                                                                                              |
| ncbi-gi:1560803;mtu:Rv0896  | gltA2  | Probable citrate synthase I GltA2                                                                                                                                                                                                                                                                              |
| ncbi-gi:1560804;mtu:Rv0905  | echA6  | Possible enoyl-CoA hydratase EchA6 (enoyl hydrase) (unsaturated acyl-CoA hydratase) (crotonase)                                                                                                                                                                                                                |
| ncbi-gi:1560808;mtu:Rv0946c | pgi    | Probable glucose-6-phosphate isomerase Pgi (GPI) (phosphoglucose isomerase) (phosphohexose isomerase) (phi)                                                                                                                                                                                                    |
| ncbi-gi:1560809;mtu:Rv0951  | sucC   | Probable succinyl-CoA synthetase (beta chain) SucC (SCS-beta)                                                                                                                                                                                                                                                  |
| ncbi-gi:1560809;mtu:Rv0952  | sucD   | Probable succinyl-CoA synthetase (alpha chain) SucD (SCS-alpha)                                                                                                                                                                                                                                                |
| ncbi-gi:1560809;mtu:Rv0957  | purH   | Probable bifunctional purine biosynthesis protein PurH: phosphoribosylaminoimidazolecarboxamide formyltransferase (AICAR transformylase) (5'-phosphoribosyl-5-aminoimidazole-4-carboxamide formyltransferase) + inosinemonophosphate cyclohydrolase (imp cyclohydrolase) (inosinicase) (imp synthetase) (ATIC) |
| ncbi-gi:1560811;mtu:Rv0971c | echA7  | Probable enoyl-CoA hydratase EchA7 (enoyl hydrase) (unsaturated acyl-CoA hydratase) (crotonase)                                                                                                                                                                                                                |
| ncbi-gi:1560811;mtu:Rv0972c | fadE12 | Acyl-CoA dehydrogenase FadE12                                                                                                                                                                                                                                                                                  |
| ncbi-gi:1560815;mtu:Rv1017c | prsA   | Probable ribose-phosphate pyrophosphokinase PrsA (phosphoribosyl pyrophosphate synthetase) (PRPP synthetase)                                                                                                                                                                                                   |
| ncbi-gi:1560815;mtu:Rv1018c | glmU   | Probable UDP-N-acetylglucosamine pyrophosphorylase GlmU                                                                                                                                                                                                                                                        |
| ncbi-gi:1560816;mtu:Rv1023  | eno    | Probable enolase Eno                                                                                                                                                                                                                                                                                           |
| ncbi-gi:1560821;mtu:Rv1070c | echA8  | Probable enoyl-CoA hydratase EchA8 (enoyl hydrase) (unsaturated acyl-CoA hydratase) (crotonase)                                                                                                                                                                                                                |
| ncbi-gi:1560821;mtu:Rv1071c | echA9  | Possible enoyl-CoA hydratase EchA9 (enoyl hydrase) (unsaturated acyl-CoA hydratase) (crotonase)                                                                                                                                                                                                                |
| ncbi-gi:1560821;mtu:Rv1074c | fadA3  | Probable beta-ketoacyl CoA thiolase FadA3                                                                                                                                                                                                                                                                      |
| ncbi-gi:1560821;mtu:Rv1079  | metB   | Cystathionine gamma-synthase MetB (CGS) (O-succinylhomoserine [thiol]-lyase)                                                                                                                                                                                                                                   |
| ncbi-gi:4488247;mtu:Rv1093  | glyA1  | Serine hydroxymethyltransferase 1 GlyA1                                                                                                                                                                                                                                                                        |
| ncbi-gi:1560823;mtu:Rv1098c | fum    | Probable fumarase Fum (fumarate hydratase)                                                                                                                                                                                                                                                                     |
| ncbi-gi:4488247;mtu:Rv1099c | glpX   | Fructose 1,6-bisphosphatase GlpX                                                                                                                                                                                                                                                                               |
| ncbi-gi:5711682;mtu:Rv1110  | lytB2  | Probable LYTb-related protein LytB2                                                                                                                                                                                                                                                                            |
| ncbi-gi:5711683;mtu:Rv1121  | zwf1   | Probable glucose-6-phosphate 1-dehydrogenase Zwf1 (G6PD)                                                                                                                                                                                                                                                       |
| ncbi-gi:1560826;mtu:Rv1122  | gnd2   | Probable 6-phosphogluconate dehydrogenase,decarboxylating Gnd2                                                                                                                                                                                                                                                 |
| ncbi-gi:1560827;mtu:Rv1133c | metE   | Probable 5-methyltetrahydropteroyltriglutamate--homocysteine methyltransferase MetE (methionine synthase, vitamin-B12 independent isozyme)                                                                                                                                                                     |
| ncbi-gi:1560838;mtu:Rv1240  | mdh    | Probable malate dehydrogenase Mdh                                                                                                                                                                                                                                                                              |
| ncbi-gi:1560846;mtu:Rv1323  | fadA4  | Probable acetyl-CoA acetyltransferase FadA4 (acetoacetyl-CoA thiolase)                                                                                                                                                                                                                                         |
| ncbi-gi:1560846;mtu:Rv1328  | glgP   | Probable glycogen phosphorylase GlgP                                                                                                                                                                                                                                                                           |
| ncbi-gi:1560848;mtu:Rv1346  | mbtN   | Acyl-CoA dehydrogenase MbtN                                                                                                                                                                                                                                                                                    |
| ncbi-gi:1560853;mtu:Rv1392  | metK   | Probable S-adenosylmethionine synthetase MetK (mat) (AdoMet synthetase) (methionine adenosyltransferase)                                                                                                                                                                                                       |
| ncbi-gi:1560857;mtu:Rv1436  | gap    | Probable glyceraldehyde 3-phosphate dehydrogenase Gap (GAPDH)                                                                                                                                                                                                                                                  |
| ncbi-gi:1560857;mtu:Rv1437  | pgk    | Probable phosphoglycerate kinase Pgk                                                                                                                                                                                                                                                                           |
| ncbi-gi:1560857;mtu:Rv1438  | tpi    | Probable triosephosphate isomerase Tpi (TIM)                                                                                                                                                                                                                                                                   |
| ncbi-gi:1560858;mtu:Rv1448c | tal    | Probable transaldolase Tal                                                                                                                                                                                                                                                                                     |
| ncbi-gi:1560858;mtu:Rv1449c | tkt    | Transketolase Tkt (TK)                                                                                                                                                                                                                                                                                         |
| ncbi-gi:1560860;mtu:Rv1467c | fadE15 | Probable acyl-CoA dehydrogenase FadE15                                                                                                                                                                                                                                                                         |
| ncbi-gi:1560861;mtu:Rv1475c | acn    | Probable iron-regulated aconitate hydratase Acn (citrate hydro-lyase) (aconitase)                                                                                                                                                                                                                              |
| ncbi-gi:1560869;mtu:Rv1559  | ilvA   | Probable threonine dehydratase IlvA                                                                                                                                                                                                                                                                            |
| ncbi-gi:1560873;mtu:Rv1601  | hisB   | Probable imidazole glycerol-phosphate dehydratase HisB                                                                                                                                                                                                                                                         |
| ncbi-gi:1560874;mtu:Rv1603  | hisA   | Probable phosphoribosylformimino-5-aminoimidazole carboxamide ribotide isomerase HisA                                                                                                                                                                                                                          |
| ncbi-gi:1560874;mtu:Rv1611  | trpC   | Probable indole-3-glycerol phosphate synthase TrpC                                                                                                                                                                                                                                                             |
| ncbi-gi:1560875;mtu:Rv1617  | pykA   | Probable pyruvate kinase PykA                                                                                                                                                                                                                                                                                  |
| ncbi-gi:1560879;mtu:Rv1654  | argB   | Probable acetylglutamate kinase ArgB                                                                                                                                                                                                                                                                           |
| ncbi-gi:1560879;mtu:Rv1655  | argD   | Probable acetylornithine aminotransferase ArgD                                                                                                                                                                                                                                                                 |
| ncbi-gi:1560879;mtu:Rv1656  | argF   | Probable ornithine carbamoyltransferase, anabolic ArgF                                                                                                                                                                                                                                                         |
| ncbi-gi:1560898;mtu:Rv1843c | guaB1  | Probable inosine-5'-monophosphate dehydrogenase GuaB1(imp dehydrogenase) (IMPDH) (IMPD)                                                                                                                                                                                                                        |
| ncbi-gi:1560916;mtu:Rv2029c | pfkB   | 6-phosphofructokinase PfkB (phosphohexokinase) (phosphofructokinase)                                                                                                                                                                                                                                           |
| ncbi-gi:1560919;mtu:Rv2054  |        | hypothetical protein                                                                                                                                                                                                                                                                                           |
| ncbi-gi:1560925;mtu:Rv2121c | hisG   | ATP phosphoribosyltransferase HisG                                                                                                                                                                                                                                                                             |
| ncbi-gi:1560931;mtu:Rv2178c | aroG   | 3-deoxy-D-arabino-heptulosonate 7-phosphate synthase AroG (DAHP synthetase, phenylalanine-repressible)                                                                                                                                                                                                         |
| ncbi-gi:1560934;mtu:Rv2210c | ilvE   | Branched-chain amino acid transaminase IlvE                                                                                                                                                                                                                                                                    |
| ncbi-gi:1560935;mtu:Rv2215  | dlaT   | DlaT, dihydroliipoamide acyltransferase, E2 component of pyruvate dehydrogenase                                                                                                                                                                                                                                |
| ncbi-gi:4488247;mtu:Rv2241  | aceE   | Pyruvate dehydrogenase E1 component AceE (pyruvate decarboxylase) (pyruvate dehydrogenase) (pyruvic dehydrogenase)                                                                                                                                                                                             |
| ncbi-gi:1560955;mtu:Rv2419c | gpgP   | Glucosyl-3-phosphoglycerate phosphatase GpgP                                                                                                                                                                                                                                                                   |
| ncbi-gi:5711699;mtu:Rv2465c | rpiB   | Ribose-5-phosphate isomerase                                                                                                                                                                                                                                                                                   |
| ncbi-gi:1560963;mtu:Rv2495c | bkdC   | Probable branched-chain keto acid dehydrogenase E2 component BkdC                                                                                                                                                                                                                                              |
| ncbi-gi:1560963;mtu:Rv2498c | citE   | Probable citrate (pro-3S)-lyase (beta subunit) CitE (citrase) (citratase) (citritase) (citridesmolase) (citrase aldolase)                                                                                                                                                                                      |
| ncbi-gi:1560967;mtu:Rv2537c | aroD   | 3-dehydroquinate dehydratase AroD (AROQ) (3-dehydroquinase) (type II dhqase)                                                                                                                                                                                                                                   |
| ncbi-gi:1560967;mtu:Rv2538c | aroB   | 3-dehydroquinate synthase AroB                                                                                                                                                                                                                                                                                 |
| ncbi-gi:1560967;mtu:Rv2540c | aroF   | Probable chorismate synthase AroF (5-enolpyruvylshikimate-3-phosphate phospholyase)                                                                                                                                                                                                                            |
| ncbi-gi:1560981;mtu:Rv2679  | echA15 | Probable enoyl-CoA hydratase EchA15 (enoyl hydrase) (unsaturated acyl-CoA hydratase) (crotonase)                                                                                                                                                                                                               |
| ncbi-gi:1560986;mtu:Rv2726c | dapF   | Probable diaminopimelate epimerase DapF (DAP epimerase)                                                                                                                                                                                                                                                        |
| ncbi-gi:1560989;mtu:Rv2753c | dapA   | Probable dihydrodipicolinate synthase DapA (DHDPS) (dihydrodipicolinate synthetase)                                                                                                                                                                                                                            |
| ncbi-gi:1560990;mtu:Rv2765  |        | Probable alanine rich hydrolase                                                                                                                                                                                                                                                                                |
| ncbi-gi:1560991;mtu:Rv2773c | dapB   | Dihydrodipicolinate reductase DapB (DHPR)                                                                                                                                                                                                                                                                      |
| ncbi-gi:1560992;mtu:Rv2789c | fadE21 | Probable acyl-CoA dehydrogenase FadE21                                                                                                                                                                                                                                                                         |
| ncbi-gi:4488247;mtu:Rv2790c | ltp1   | Probable lipid-transfer protein Ltp1                                                                                                                                                                                                                                                                           |
| ncbi-gi:1561000;mtu:Rv2868c | gcpE   | Probable GcpE protein                                                                                                                                                                                                                                                                                          |
| ncbi-gi:5711704;mtu:Rv2992c | gltS   | Glutamyl-tRNA synthetase GltS (glutamate--tRNA ligase) (glutamyl-tRNA synthase) (GLURS)                                                                                                                                                                                                                        |
| ncbi-gi:1561013;mtu:Rv2995c | leuB   | Probable 3-isopropylmalate dehydrogenase LeuB (beta-IPM dehydrogenase) (IMDH) (3-IPM-DH)                                                                                                                                                                                                                       |
| ncbi-gi:4488247;mtu:Rv3001c | ilvC   | Probable KETOL-acid reductoisomerase IlvC (acetohydroxy-acid isomeroreductase) (alpha-keto-beta-hydroxylacil reductoisomerase)                                                                                                                                                                                 |
| ncbi-gi:1561013;mtu:Rv3002c | ilvN   | Probable acetolactate synthase (small subunit) IlvN (acetohydroxy-acid synthase) (AHAS) (ALS)                                                                                                                                                                                                                  |
| ncbi-gi:5711704;mtu:Rv3003c | ilvB1  | Acetolactate synthase (large subunit) IlvB1 (acetohydroxy-acid synthase)                                                                                                                                                                                                                                       |
| ncbi-gi:1561014;mtu:Rv3010c | pfkA   | Probable 6-phosphofructokinase PfkA (phosphohexokinase) (phosphofructokinase)                                                                                                                                                                                                                                  |
| ncbi-gi:1561021;mtu:Rv3075c |        | hypothetical protein                                                                                                                                                                                                                                                                                           |
| ncbi-gi:1561022;mtu:Rv3086  | adhD   | Probable zinc-type alcohol dehydrogenase AdhD (aldehyde reductase)                                                                                                                                                                                                                                             |
| ncbi-gi:1561027;mtu:Rv3139  | fadE24 | Probable acyl-CoA dehydrogenase FadE24                                                                                                                                                                                                                                                                         |
| ncbi-gi:1561027;mtu:Rv3140  | fadE23 | Probable acyl-CoA dehydrogenase FadE23                                                                                                                                                                                                                                                                         |
| ncbi-gi:1561035;mtu:Rv3215  | entC   | Probable isochorismate synthase EntC (isochorismate hydroxymutase) (enterochelin biosynthesis)                                                                                                                                                                                                                 |
| ncbi-gi:1561036;mtu:Rv3227  | aroA   | 3-phosphoshikimate 1-carboxyvinyltransferase AroA (5-enolpyruvylshikimate-3-phosphate synthase) (EPSP synthase) (EPSPS)                                                                                                                                                                                        |
| ncbi-gi:1561039;mtu:Rv3255c | manA   | Probable mannose-6-phosphate isomerase ManA (phosphomannose isomerase) (phosphomannoisomerase) (PMI) (phosphohexoisomerase) (phosphohexomutase)                                                                                                                                                                |
| ncbi-gi:5711708;mtu:Rv3264c | manB   | D-alpha-D-mannose-1-phosphate guanylyltransferase ManB (D-alpha-D-heptose-1-phosphate guanylyltransferase)                                                                                                                                                                                                     |

|                             |        |                                                                                                                                                                                                                                                             |
|-----------------------------|--------|-------------------------------------------------------------------------------------------------------------------------------------------------------------------------------------------------------------------------------------------------------------|
| ncbi-gi:1561041 mtu:Rv3274c | fadE25 | Probable acyl-CoA dehydrogenase FadE25                                                                                                                                                                                                                      |
| ncbi-gi:1561041 mtu:Rv3275c | purE   | Probable phosphoribosylaminoimidazole carboxylase catalytic subunit PurE (air carboxylase) (AIRC)                                                                                                                                                           |
| ncbi-gi:1561041 mtu:Rv3276c | purK   | Probable phosphoribosylaminoimidazole carboxylase ATPase subunit PurK (air carboxylase) (AIRC)                                                                                                                                                              |
| ncbi-gi:1561045 mtu:Rv3318  | sdhA   | Probable succinate dehydrogenase (flavoprotein subunit) SdhA (succinic dehydrogenase) (fumarate reductase) (fumarate dehydrogenase) (fumaric hydrogenase)                                                                                                   |
| ncbi-gi:1561047 mtu:Rv3339c | icd1   | Probable isocitrate dehydrogenase [NADP] Icd1 (oxalosuccinate decarboxylase) (IDH) (NADP+-specific ICDH) (IDP)                                                                                                                                              |
| ncbi-gi:1561054 mtu:Rv3410c | guaB3  | Probable inosine-5'-monophosphate dehydrogenase GuaB3 (imp dehydrogenase) (inosinic acid dehydrogenase) (inosinate dehydrogenase) (imp oxidoreductase) (inosine-5'-monophosphate oxidoreductase) (IMPDH) (IMPD)                                             |
| ncbi-gi:1561056 mtu:Rv3432c | gadB   | Probable glutamate decarboxylase GadB                                                                                                                                                                                                                       |
| ncbi-gi:1561057 mtu:Rv3436c | glmS   | Probable glucosamine--fructose-6-phosphate aminotransferase [isomerizing] GlmS (hexosephosphate aminotransferase) (D-fructose-6-phosphate amidotransferase) (GFAT) (L-glutamine-D-fructose-6-phosphate amidotransferase) (glucosamine-6-phosphate synthase) |
| ncbi-gi:1561064 mtu:Rv3504  | fadE26 | Probable acyl-CoA dehydrogenase FadE26                                                                                                                                                                                                                      |
| ncbi-gi:1561065 mtu:Rv3516  | echA19 | Possible enoyl-CoA hydratase EchA19 (enoyl hydrase) (unsaturated acyl-CoA hydratase) (crotonase)                                                                                                                                                            |
| ncbi-gi:1561069 mtu:Rv3556c | fadA6  | Probable acetyl-CoA acetyltransferase FadA6 (acetoacetyl-CoA thiolase)                                                                                                                                                                                      |
| ncbi-gi:1561069 mtu:Rv3563  | fadE32 | Probable acyl-CoA dehydrogenase FadE32                                                                                                                                                                                                                      |
| ncbi-gi:5711712 mtu:Rv3566c | nat    | Arylamine N-acetyltransferase Nat (arylamine acetylase)                                                                                                                                                                                                     |
| ncbi-gi:1561071 mtu:Rv3581c | ispF   | Probable 2C-methyl-D-erythritol 2,4-cyclodiphosphate synthase IspF (MECPS)                                                                                                                                                                                  |
| ncbi-gi:5711713 mtu:Rv3634c | galE1  | UDP-glucose 4-epimerase GalE1 (galactowaldenase) (UDP-galactose 4-epimerase) (uridine diphosphate galactose 4-epimerase) (uridine diphospho-galactose 4-epimerase)                                                                                          |
| ncbi-gi:1561080 mtu:Rv3667  | acs    | Acetyl-coenzyme A synthetase Acs (acetate--CoA ligase) (acetyl-CoA synthetase) (acetyl-CoA synthase) (acyl-activating enzyme) (acetate thiokinase) (acetyl-activating enzyme) (acetate--coenzyme A ligase) (acetyl-coenzyme A synthase)                     |
| ncbi-gi:3454620 mtu:Rv3710  | leuA   | 2-isopropylmalate synthase LeuA (alpha-isopropylmalate synthase) (alpha-IPM synthetase) (IPMS)                                                                                                                                                              |
| ncbi-gi:1561089 mtu:Rv3761c | fadE36 | Possible acyl-CoA dehydrogenase FadE36                                                                                                                                                                                                                      |
| ncbi-gi:1561091 mtu:Rv3774  | echA21 | Possible enoyl-CoA hydratase EchA21 (enoyl hydrase) (unsaturated acyl-CoA hydratase) (crotonase)                                                                                                                                                            |
| ncbi-gi:1561097 mtu:Rv3838c | pheA   | Prephenate dehydratase PheA                                                                                                                                                                                                                                 |
| ncbi-gi:1561099 mtu:Rv3858c | gltD   | Probable NADH-dependent glutamate synthase (small subunit) GltD (L-glutamate synthase) (L-glutamate synthetase) (NADH-glutamate synthase) (glutamate synthase (NADH)) (GLTS beta chain) (NADPH-GOGAT)                                                       |
| ncbi-gi:1561099 mtu:Rv3859c | gltB   | Probable ferredoxin-dependent glutamate synthase [NADPH] (large subunit) GltB (L-glutamate synthase) (L-glutamate synthetase) (NADH-glutamate synthase) (glutamate synthase (NADH))(NADPH-GOGAT)                                                            |

#### mtu01120 Microbial metabolism in diverse environments - Mycobacterium tuberculosis H37Rv (97)

|                             |       |                                                                                                                                          |
|-----------------------------|-------|------------------------------------------------------------------------------------------------------------------------------------------|
| ncbi-gi:1560720 mtu:Rv0066c | icd2  | Probable isocitrate dehydrogenase [NADP] Icd2 (oxalosuccinate decarboxylase) (IDH) (NADP+-specific ICDH) (IDP)                           |
| ncbi-gi:1560735 mtu:Rv0211  | pckA  | Probable iron-regulated phosphoenolpyruvate carboxykinase [GTP] PckA (phosphoenolpyruvate carboxylase) (PEPCK)(pep carboxykinase)        |
| ncbi-gi:1560736 mtu:Rv0222  | echA1 | Probable enoyl-CoA hydratase EchA1 (enoyl hydrase) (unsaturated acyl-CoA hydratase) (crotonase)                                          |
| ncbi-gi:1560736 mtu:Rv0223c |       | Probable aldehyde dehydrogenase                                                                                                          |
| ncbi-gi:5711670 mtu:Rv0234c | gabD1 | Succinate-semialdehyde dehydrogenase [NADP+] dependent (SSDH) GabD1                                                                      |
| ncbi-gi:1560738 mtu:Rv0243  | fadA2 | Probable acetyl-CoA acyltransferase FadA2 (3-ketoacyl-CoA thiolase) (beta-ketothiolase)                                                  |
| ncbi-gi:1560738 mtu:Rv0247c |       | Probable succinate dehydrogenase [iron-sulfur subunit] (succinic dehydrogenase)                                                          |
| ncbi-gi:1560738 mtu:Rv0248c |       | Probable succinate dehydrogenase [iron-sulfur subunit] (succinic dehydrogenase)                                                          |
| ncbi-gi:1560750 mtu:Rv0363c | fba   | Probable fructose-bisphosphate aldolase Fba                                                                                              |
| ncbi-gi:1560754 mtu:Rv0408  | pta   | Probable phosphate acetyltransferase Pta (phosphotransacetylase)                                                                         |
| ncbi-gi:1560760 mtu:Rv0462  | lpdC  | Dihydrolipoamide dehydrogenase LpdC (lipoamide reductase (NADH)) (lipoyl dehydrogenase) (dihydrolipoyl dehydrogenase) (diaphorase)       |
| ncbi-gi:5711673 mtu:Rv0467  | icl1  | Isocitrate lyase Icl (isocitrase) (isocitratase)                                                                                         |
| ncbi-gi:1560760 mtu:Rv0468  | fadB2 | 3-hydroxybutyryl-CoA dehydrogenase FadB2 (beta-hydroxybutyryl-CoA dehydrogenase) (BHBD)                                                  |
| ncbi-gi:5711673 mtu:Rv0489  | gpm1  | Probable phosphoglycerate mutase 1 Gpm1 (phosphoglyceromutase) (PGAM) (BPG-dependent PGAM)                                               |
| ncbi-gi:1560777 mtu:Rv0632c | echA3 | Probable enoyl-CoA hydratase EchA3 (enoyl hydrase) (unsaturated acyl-CoA hydratase) (crotonase)                                          |
| ncbi-gi:5711676 mtu:Rv0675  | echA5 | Probable enoyl-CoA hydratase EchA5 (enoyl hydrase) (unsaturated acyl-CoA hydratase) (crotonase)                                          |
| ncbi-gi:1560790 mtu:Rv0760c |       | hypothetical protein                                                                                                                     |
| ncbi-gi:5711677 mtu:Rv0761c | adhB  | Possible zinc-containing alcohol dehydrogenase NAD dependent AdhB                                                                        |
| ncbi-gi:5711678 mtu:Rv0794c | lpdB  | Probable oxidoreductase                                                                                                                  |
| ncbi-gi:1560795 mtu:Rv0815c | cysA2 | Probable thiosulfate sulfurtransferase CysA2 (rhodanese-like protein) (thiosulfate cyanide transsulfurase) (thiosulfate thiotransferase) |
| ncbi-gi:1560799 mtu:Rv0858c | dapC  | Probable N-succinyldiaminopimelate aminotransferase DapC (DAP-at)                                                                        |
| ncbi-gi:1560799 mtu:Rv0859  | fadA  | Possible acyl-CoA thiolase FadA                                                                                                          |
| ncbi-gi:1560800 mtu:Rv0860  | fadB  | Probable fatty oxidation protein FadB                                                                                                    |
| ncbi-gi:1560802 mtu:Rv0884c | serC  | Possible phosphoserine aminotransferase SerC (PSAT)                                                                                      |
| ncbi-gi:1560802 mtu:Rv0889c | citA  | Probable citrate synthase II CitA                                                                                                        |
| ncbi-gi:1560803 mtu:Rv0896  | gltA2 | Probable citrate synthase I GltA2                                                                                                        |
| ncbi-gi:1560804 mtu:Rv0905  | echA6 | Possible enoyl-CoA hydratase EchA6 (enoyl hydrase) (unsaturated acyl-CoA hydratase) (crotonase)                                          |
| ncbi-gi:1560808 mtu:Rv0946c | pgi   | Probable glucose-6-phosphate isomerase Pgi (GPI) (phosphoglucose isomerase) (phosphohexose isomerase) (phi)                              |
| ncbi-gi:1560809 mtu:Rv0951  | sucC  | Probable succinyl-CoA synthetase (beta chain) SucC (SCS-beta)                                                                            |
| ncbi-gi:1560809 mtu:Rv0952  | sucD  | Probable succinyl-CoA synthetase (alpha chain) SucD (SCS-alpha)                                                                          |
| ncbi-gi:1560811 mtu:Rv0971c | echA7 | Probable enoyl-CoA hydratase EchA7 (enoyl hydrase) (unsaturated acyl-CoA hydratase) (crotonase)                                          |
| ncbi-gi:1560815 mtu:Rv1017c | prsA  | Probable ribose-phosphate pyrophosphokinase PrsA (phosphoribosyl pyrophosphate synthetase) (PRPP synthetase)                             |
| ncbi-gi:1560816 mtu:Rv1023  | eno   | Probable enolase Eno                                                                                                                     |
| ncbi-gi:1560821 mtu:Rv1070c | echA8 | Probable enoyl-CoA hydratase EchA8 (enoyl hydrase) (unsaturated acyl-CoA hydratase) (crotonase)                                          |
| ncbi-gi:1560821 mtu:Rv1071c | echA9 | Possible enoyl-CoA hydratase EchA9 (enoyl hydrase) (unsaturated acyl-CoA hydratase) (crotonase)                                          |
| ncbi-gi:1560821 mtu:Rv1074c | fadA3 | Probable beta-ketoacyl CoA thiolase FadA3                                                                                                |
| ncbi-gi:4488247 mtu:Rv1093  | glyA1 | Serine hydroxymethyltransferase 1 GlyA1                                                                                                  |
| ncbi-gi:1560823 mtu:Rv1098c | fum   | Probable fumarase Fum (fumarate hydratase)                                                                                               |
| ncbi-gi:4488247 mtu:Rv1099c | glpX  | Fructose 1,6-bisphosphatase GlpX                                                                                                         |
| ncbi-gi:5711683 mtu:Rv1121  | zwf1  | Probable glucose-6-phosphate 1-dehydrogenase Zwf1 (G6PD)                                                                                 |
| ncbi-gi:1560826 mtu:Rv1122  | gnd2  | Probable 6-phosphogluconate dehydrogenase,decarboxylating Gnd2                                                                           |
| ncbi-gi:1560834 mtu:Rv1201c | dapD  | Tetrahydrodipicolinate N-succinyltransferase DapD                                                                                        |
| ncbi-gi:1560838 mtu:Rv1240  | mdh   | Probable malate dehydrogenase Mdh                                                                                                        |
| ncbi-gi:1560843 mtu:Rv1295  | thrC  | Threonine synthase ThrC (ts)                                                                                                             |
| ncbi-gi:1560846 mtu:Rv1323  | fadA4 | Probable acetyl-CoA acetyltransferase FadA4 (acetoacetyl-CoA thiolase)                                                                   |
| ncbi-gi:1560857 mtu:Rv1436  | gap   | Probable glyceraldehyde 3-phosphate dehydrogenase Gap (GAPDH)                                                                            |
| ncbi-gi:1560857 mtu:Rv1437  | pgk   | Probable phosphoglycerate kinase Pgk                                                                                                     |
| ncbi-gi:1560857 mtu:Rv1438  | tpi   | Probable triosephosphate isomerase Tpi (TIM)                                                                                             |
| ncbi-gi:1560858 mtu:Rv1448c | tal   | Probable transaldolase Tal                                                                                                               |
| ncbi-gi:1560858 mtu:Rv1449c | tkt   | Transketolase Tkt (TK)                                                                                                                   |
| ncbi-gi:1560861 mtu:Rv1475c | acn   | Probable iron-regulated aconitate hydratase Acn (citrate hydro-lyase) (aconitase)                                                        |
| ncbi-gi:1560863 mtu:Rv1492  | mutA  | Probable methylmalonyl-CoA mutase small subunit MutA (MCM)                                                                               |
| ncbi-gi:1560863 mtu:Rv1493  | mutB  | Probable methylmalonyl-CoA mutase large subunit MutB (MCM)                                                                               |
| ncbi-gi:1560875 mtu:Rv1617  | pykA  | Probable pyruvate kinase PykA                                                                                                            |
| ncbi-gi:5711690 mtu:Rv1731  | gabD2 | Possible succinate-semialdehyde dehydrogenase [NADP+] dependent (SSDH) GabD2                                                             |
| ncbi-gi:1560897 mtu:Rv1837c | glcB  | Malate synthase G GlcB                                                                                                                   |
| ncbi-gi:1560916 mtu:Rv2029c | pfkB  | 6-phosphofructokinase PfkB (phosphohexokinase) (phosphofructokinase)                                                                     |
| ncbi-gi:1560919 mtu:Rv2054  |       | hypothetical protein                                                                                                                     |
| ncbi-gi:1560935 mtu:Rv2215  | dlaT  | DlaT, dihydrolipoamide acyltransferase, E2 component of pyruvate dehydrogenase                                                           |
| ncbi-gi:1560935 mtu:Rv2220  | glnA1 | Glutamine synthetase GlnA1 (glutamine synthase) (GS-I)                                                                                   |

|                  |             |        |                                                                                                                                                                                                                   |
|------------------|-------------|--------|-------------------------------------------------------------------------------------------------------------------------------------------------------------------------------------------------------------------|
| ncbi-gi:1560935' | mtu:Rv2222c | glnA2  | Probable glutamine synthetase GlnA2 (glutamine synthase) (GS-II)                                                                                                                                                  |
| ncbi-gi:4488247' | mtu:Rv2241  | aceE   | Pyruvate dehydrogenase E1 component AceE (pyruvate decarboxylase) (pyruvate dehydrogenase) (pyruvic dehydrogenase)                                                                                                |
| ncbi-gi:1560943' | mtu:Rv2296  |        | Probable haloalkane dehalogenase                                                                                                                                                                                  |
| ncbi-gi:5711697' | mtu:Rv2334  | cysK1  | Cysteine synthase a CysK1 (O-acetylserine sulfhydrylase A) (O-acetylserine (thiol)-lyase A) (CSASE A)                                                                                                             |
| ncbi-gi:1560952' | mtu:Rv2391  | sirA   | Ferredoxin-dependent sulfite reductase SirA                                                                                                                                                                       |
| ncbi-gi:1560955' | mtu:Rv2419c | gpgP   | Glucosyl-3-phosphoglycerate phosphatase GpgP                                                                                                                                                                      |
| ncbi-gi:1560959  | mtu:Rv2454c |        | Probable oxidoreductase (beta subunit)                                                                                                                                                                            |
| ncbi-gi:1560959' | mtu:Rv2455c |        | Probable oxidoreductase (alpha subunit)                                                                                                                                                                           |
| ncbi-gi:5711699' | mtu:Rv2465c | rpiB   | Ribose-5-phosphate isomerase                                                                                                                                                                                      |
| ncbi-gi:1560963' | mtu:Rv2495c | bkdC   | Probable branched-chain keto acid dehydrogenase E2 component BkdC                                                                                                                                                 |
| ncbi-gi:1560981' | mtu:Rv2679  | echA15 | Probable enoyl-CoA hydratase EchA15 (enoyl hydrase) (unsaturated acyl-CoA hydratase) (crotonase)                                                                                                                  |
| ncbi-gi:1560986' | mtu:Rv2726c | dapF   | Probable diaminopimelate epimerase DapF (DAP epimerase)                                                                                                                                                           |
| ncbi-gi:1560989' | mtu:Rv2753c | dapA   | Probable dihydrodipicolinate synthase DapA (DHDPS) (dihydrodipicolinate synthetase)                                                                                                                               |
| ncbi-gi:1560990' | mtu:Rv2765  |        | Probable alanine rich hydrolase                                                                                                                                                                                   |
| ncbi-gi:1560991' | mtu:Rv2773c | dapB   | Dihydrodipicolinate reductase DapB (DHPR)                                                                                                                                                                         |
| ncbi-gi:4488247' | mtu:Rv2790c | ltp1   | Probable lipid-transfer protein Ltp1                                                                                                                                                                              |
| ncbi-gi:5711703' | mtu:Rv2922A | acyP   | Probable acylphosphatase AcyP (acylphosphate phosphohydrolase)                                                                                                                                                    |
| ncbi-gi:1561010' | mtu:Rv2967c | pca    | Probable pyruvate carboxylase Pca (pyruvic carboxylase)                                                                                                                                                           |
| ncbi-gi:5711704' | mtu:Rv2996c | serA1  | Probable D-3-phosphoglycerate dehydrogenase SerA1 (PGDH)                                                                                                                                                          |
| ncbi-gi:1561014' | mtu:Rv3010c | pfkA   | Probable 6-phosphofructokinase PfkA (phosphohexokinase) (phosphofructokinase)                                                                                                                                     |
| ncbi-gi:1561022' | mtu:Rv3086  | adhD   | Probable zinc-type alcohol dehydrogenase AdhD (aldehyde reductase)                                                                                                                                                |
| ncbi-gi:1561041' | mtu:Rv3280  | accD5  | Probable propionyl-CoA carboxylase beta chain 5 AccD5 (pccase) (propanoyl-CoA:carbon dioxide ligase)                                                                                                              |
| ncbi-gi:1561041' | mtu:Rv3283  | sseA   | Probable thiosulfate sulfurtransferase SseA (rhodanese) (thiosulfate cyanide transsulfurase) (thiosulfate thiotransferase)                                                                                        |
| ncbi-gi:1561045' | mtu:Rv3318  | sdhA   | Probable succinate dehydrogenase (flavoprotein subunit) SdhA (succinic dehydrogenase) (fumarate reductase) (fumarate dehydrogenase) (fumaric hydrogenase)                                                         |
| ncbi-gi:1561047' | mtu:Rv3339c | icd1   | Probable isocitrate dehydrogenase [NADP] Icd1 (oxalosuccinate decarboxylase) (IDH) (NADP+-specific ICDH) (IDP)                                                                                                    |
| ncbi-gi:1561049' | mtu:Rv3356c | folD   | Probable bifunctional protein FolD: methylenetetrahydrofolate dehydrogenase + methenyltetrahydrofolate cyclohydrolase                                                                                             |
| ncbi-gi:1561065' | mtu:Rv3516  | echA19 | Possible enoyl-CoA hydratase EchA19 (enoyl hydrase) (unsaturated acyl-CoA hydratase) (crotonase)                                                                                                                  |
| ncbi-gi:1561067  | mtu:Rv3535c | hsaG   | Probable acetaldehyde dehydrogenase (acetaldehyde dehydrogenase [acetylating])                                                                                                                                    |
| ncbi-gi:1561069' | mtu:Rv3556c | fadA6  | Probable acetyl-CoA acetyltransferase FadA6 (acetoacetyl-CoA thiolase)                                                                                                                                            |
| ncbi-gi:5711712' | mtu:Rv3566c | nat    | Arylamine N-acetyltransferase Nat (arylamine acetylase)                                                                                                                                                           |
| ncbi-gi:1561070' | mtu:Rv3568c | hsaC   | 3,4-DHSA dioxygenase                                                                                                                                                                                              |
| ncbi-gi:1561070' | mtu:Rv3569c | hsaD   | 4,9-DHSA hydrolase                                                                                                                                                                                                |
| ncbi-gi:1561070' | mtu:Rv3570c | hsaA   | Possible oxidoreductase Possible 3-hydroxy-9,10-seconandrost-1,3,5(10)-triene-9,17-dione hydroxylase                                                                                                              |
| ncbi-gi:1561080' | mtu:Rv3667  | acsA   | Acetyl-coenzyme A synthetase Acs (acetate--CoA ligase) (acetyl-CoA synthetase) (acyl-activating enzyme) (acetate thiokinase) (acetyl-activating enzyme) (acetate--coenzyme A ligase) (acetyl-coenzyme A synthase) |
| ncbi-gi:1561091' | mtu:Rv3774  | echA21 | Possible enoyl-CoA hydratase EchA21 (enoyl hydrase) (unsaturated acyl-CoA hydratase) (crotonase)                                                                                                                  |
| ncbi-gi:1561099' | mtu:Rv3858c | gltD   | Probable NADH-dependent glutamate synthase (small subunit) GltD (L-glutamate synthase) (L-glutamate synthetase) (NADH-glutamate synthase) (glutamate synthase (NADH)) (GLTS beta chain) (NADPH-GOGAT)             |
| ncbi-gi:1561099' | mtu:Rv3859c | gltB   | Probable ferredoxin-dependent glutamate synthase [NADPH] (large subunit) GltB (L-glutamate synthase) (L-glutamate synthetase) (NADH-glutamate synthase) (glutamate synthase (NADH))(NADPH-GOGAT)                  |

#### mtu01200 Carbon metabolism - Mycobacterium tuberculosis H37Rv (61)

|                  |             |       |                                                                                                                                    |
|------------------|-------------|-------|------------------------------------------------------------------------------------------------------------------------------------|
| ncbi-gi:1560720' | mtu:Rv0066c | icd2  | Probable isocitrate dehydrogenase [NADP] Icd2 (oxalosuccinate decarboxylase) (IDH) (NADP+-specific ICDH) (IDP)                     |
| ncbi-gi:1560738' | mtu:Rv0243  | fadA2 | Probable acetyl-CoA acyltransferase FadA2 (3-ketoacyl-CoA thiolase) (beta-ketothiolase)                                            |
| ncbi-gi:1560738' | mtu:Rv0247c |       | Probable succinate dehydrogenase [iron-sulfur subunit] (succinic dehydrogenase)                                                    |
| ncbi-gi:1560738' | mtu:Rv0248c |       | Probable succinate dehydrogenase [iron-sulfur subunit] (succinic dehydrogenase)                                                    |
| ncbi-gi:1560750' | mtu:Rv0363c | fba   | Probable fructose-bisphosphate aldolase Fba                                                                                        |
| ncbi-gi:1560754' | mtu:Rv0408  | pta   | Probable phosphate acetyltransferase Pta (phosphotransacetylase)                                                                   |
| ncbi-gi:1560760' | mtu:Rv0462  | lpdC  | Dihydrolipoamide dehydrogenase LpdC (lipoamide reductase (NADH)) (lipoyl dehydrogenase) (dihydrolipoyl dehydrogenase) (diaphorase) |
| ncbi-gi:5711673' | mtu:Rv0467  | icl1  | Isocitrate lyase Icl (isocitrase) (isocitratase)                                                                                   |
| ncbi-gi:5711673' | mtu:Rv0489  | gpm1  | Probable phosphoglycerate mutase 1 Gpm1 (phosphoglyceromutase) (PGAM) (BPG-dependent PGAM)                                         |
| ncbi-gi:5711677' | mtu:Rv0761c | adhB  | Possible zinc-containing alcohol dehydrogenase NAD dependent AdhB                                                                  |
| ncbi-gi:5711678' | mtu:Rv0794c | lpdB  | Probable oxidoreductase                                                                                                            |
| ncbi-gi:1560799' | mtu:Rv0859  | fadA  | Possible acyl-CoA thiolase FadA                                                                                                    |
| ncbi-gi:1560800' | mtu:Rv0860  | fadB  | Probable fatty oxidation protein FadB                                                                                              |
| ncbi-gi:1560802' | mtu:Rv0884c | serC  | Possible phosphoserine aminotransferase SerC (PSAT)                                                                                |
| ncbi-gi:1560802' | mtu:Rv0889c | citA  | Probable citrate synthase II CitA                                                                                                  |
| ncbi-gi:1560803' | mtu:Rv0896  | gltA2 | Probable citrate synthase I GltA2                                                                                                  |
| ncbi-gi:1560808' | mtu:Rv0946c | pgi   | Probable glucose-6-phosphate isomerase Pgi (GPI) (phosphoglucose isomerase) (phosphohexose isomerase) (phi)                        |
| ncbi-gi:1560809  | mtu:Rv0951  | sucC  | Probable succinyl-CoA synthetase (beta chain) SucC (SCS-beta)                                                                      |
| ncbi-gi:1560809' | mtu:Rv0952  | sucD  | Probable succinyl-CoA synthetase (alpha chain) SucD (SCS-alpha)                                                                    |
| ncbi-gi:1560815' | mtu:Rv1017c | prsA  | Probable ribose-phosphate pyrophosphokinase PrsA (phosphoribosyl pyrophosphate synthetase) (PRPP synthetase)                       |
| ncbi-gi:1560816' | mtu:Rv1023  | eno   | Probable enolase Eno                                                                                                               |
| ncbi-gi:1560821' | mtu:Rv1074c | fadA3 | Probable beta-ketoacyl CoA thiolase FadA3                                                                                          |
| ncbi-gi:4488247' | mtu:Rv1093  | glyA1 | Serine hydroxymethyltransferase 1 GlyA1                                                                                            |
| ncbi-gi:1560823' | mtu:Rv1098c | fum   | Probable fumarase Fum (fumarate hydratase)                                                                                         |
| ncbi-gi:4488247' | mtu:Rv1099c | glpX  | Fructose 1,6-bisphosphatase GlpX                                                                                                   |
| ncbi-gi:5711683' | mtu:Rv1121  | zwf1  | Probable glucose-6-phosphate 1-dehydrogenase Zwf1 (G6PD)                                                                           |
| ncbi-gi:1560826' | mtu:Rv1122  | gnd2  | Probable 6-phosphogluconate dehydrogenase,decarboxylating Gnd2                                                                     |
| ncbi-gi:1560838' | mtu:Rv1240  | mdh   | Probable malate dehydrogenase Mdh                                                                                                  |
| ncbi-gi:1560846' | mtu:Rv1323  | fadA4 | Probable acetyl-CoA acetyltransferase FadA4 (acetoacetyl-CoA thiolase)                                                             |
| ncbi-gi:1560857' | mtu:Rv1436  | gap   | Probable glyceraldehyde 3-phosphate dehydrogenase Gap (GAPDH)                                                                      |
| ncbi-gi:1560857' | mtu:Rv1437  | pgk   | Probable phosphoglycerate kinase Pkg                                                                                               |
| ncbi-gi:1560857' | mtu:Rv1438  | tpi   | Probable triosephosphate isomerase Tpi (TIM)                                                                                       |
| ncbi-gi:1560858' | mtu:Rv1448c | tal   | Probable transaldolase Tal                                                                                                         |
| ncbi-gi:1560858' | mtu:Rv1449c | tkt   | Transketolase Tkt (TK)                                                                                                             |
| ncbi-gi:1560861' | mtu:Rv1475c | acn   | Probable iron-regulated aconitate hydratase Acn (citrate hydro-lyase) (aconitase)                                                  |
| ncbi-gi:1560863' | mtu:Rv1492  | mutA  | Probable methylmalonyl-CoA mutase small subunit MutA (MCM)                                                                         |
| ncbi-gi:1560863' | mtu:Rv1493  | mutB  | Probable methylmalonyl-CoA mutase large subunit MutB (MCM)                                                                         |
| ncbi-gi:1560869' | mtu:Rv1559  | ilvA  | Probable threonine dehydratase IlvA                                                                                                |
| ncbi-gi:1560875' | mtu:Rv1617  | pykA  | Probable pyruvate kinase PykA                                                                                                      |
| ncbi-gi:1560896' | mtu:Rv1832  | gcvB  | Probable glycine dehydrogenase GcvB (glycine decarboxylase) (glycine cleavage system P-protein)                                    |
| ncbi-gi:1560897' | mtu:Rv1837c | glcB  | Malate synthase G GlcB                                                                                                             |
| ncbi-gi:1560916' | mtu:Rv2029c | pfkB  | 6-phosphofructokinase PfkB (phosphohexokinase) (phosphofructokinase)                                                               |
| ncbi-gi:1560934' | mtu:Rv2211c | gcvT  | Probable aminomethyltransferase GcvT (glycine cleavage system T protein)                                                           |
| ncbi-gi:1560935' | mtu:Rv2215  | dlaT  | DlaT, dihydrolipoamide acyltransferase, E2 component of pyruvate dehydrogenase                                                     |
| ncbi-gi:4488247' | mtu:Rv2241  | aceE  | Pyruvate dehydrogenase E1 component AceE (pyruvate decarboxylase) (pyruvate dehydrogenase) (pyruvic dehydrogenase)                 |

|                             |             |                                                                                                                                                                                                                                         |
|-----------------------------|-------------|-----------------------------------------------------------------------------------------------------------------------------------------------------------------------------------------------------------------------------------------|
| ncbi-gi:5711697:mtu:Rv2334  | cysK1       | Cysteine synthase a CysK1 (O-acetylserine sulfhydrylase A) (O-acetylserine (thiol)-lyase A) (CSASE A)                                                                                                                                   |
| ncbi-gi:1560955:mtu:Rv2419c | gpgP        | Glucosyl-3-phosphoglycerate phosphatase GpgP                                                                                                                                                                                            |
| ncbi-gi:1560959             | mtu:Rv2454c | Probable oxidoreductase (beta subunit)                                                                                                                                                                                                  |
| ncbi-gi:1560959:mtu:Rv2455c |             | Probable oxidoreductase (alpha subunit)                                                                                                                                                                                                 |
| ncbi-gi:5711699:mtu:Rv2465c | rpiB        | Ribose-5-phosphate isomerase                                                                                                                                                                                                            |
| ncbi-gi:1560963:mtu:Rv2495c | bkdC        | Probable branched-chain keto acid dehydrogenase E2 component BkdC                                                                                                                                                                       |
| ncbi-gi:1561010:mtu:Rv2967c | pca         | Probable pyruvate carboxylase Pca (pyruvic carboxylase)                                                                                                                                                                                 |
| ncbi-gi:5711704:mtu:Rv2996c | serA1       | Probable D-3-phosphoglycerate dehydrogenase SerA1 (PGDH)                                                                                                                                                                                |
| ncbi-gi:1561014:mtu:Rv3010c | pfkA        | Probable 6-phosphofructokinase PfkA (phosphohexokinase) (phosphofructokinase)                                                                                                                                                           |
| ncbi-gi:1561022:mtu:Rv3086  | adhD        | Probable zinc-type alcohol dehydrogenase AdhD (aldehyde reductase)                                                                                                                                                                      |
| ncbi-gi:1561041:mtu:Rv3280  | accD5       | Probable propionyl-CoA carboxylase beta chain 5 AccD5 (pccase) (propanoyl-CoA:carbon dioxide ligase)                                                                                                                                    |
| ncbi-gi:1561045:mtu:Rv3318  | sdhA        | Probable succinate dehydrogenase (flavoprotein subunit) SdhA (succinic dehydrogenase) (fumarate reductase) (fumarate dehydrogenase) (fumaric hydrogenase)                                                                               |
| ncbi-gi:1561047:mtu:Rv3339c | icd1        | Probable isocitrate dehydrogenase [NADP] Icd1 (oxalosuccinate decarboxylase) (IDH) (NADP+-specific ICDH) (IDP)                                                                                                                          |
| ncbi-gi:1561049:mtu:Rv3356c | folD        | Probable bifunctional protein FolD: methylenetetrahydrofolate dehydrogenase + methylenetetrahydrofolate cyclohydrolase                                                                                                                  |
| ncbi-gi:1561069:mtu:Rv3556c | fadA6       | Probable acetyl-CoA acetyltransferase FadA6 (acetoacetyl-CoA thiolase)                                                                                                                                                                  |
| ncbi-gi:1561080:mtu:Rv3667  | acs         | Acetyl-coenzyme A synthetase Acs (acetate--CoA ligase) (acetyl-CoA synthetase) (acetyl-CoA synthase) (acyl-activating enzyme) (acetate thiokinase) (acetyl-activating enzyme) (acetate--coenzyme A ligase) (acetyl-coenzyme A synthase) |

#### mtu01230 Biosynthesis of amino acids - Mycobacterium tuberculosis H37Rv (60)

|                             |             |                                                                                                                                                                                                       |
|-----------------------------|-------------|-------------------------------------------------------------------------------------------------------------------------------------------------------------------------------------------------------|
| ncbi-gi:1560720:mtu:Rv0066c | icd2        | Probable isocitrate dehydrogenase [NADP] Icd2 (oxalosuccinate decarboxylase) (IDH) (NADP+-specific ICDH) (IDP)                                                                                        |
| ncbi-gi:1560733:mtu:Rv0189c | ilvD        | Probable dihydroxy-acid dehydratase IlvD (dad)                                                                                                                                                        |
| ncbi-gi:1560750:mtu:Rv0363c | fba         | Probable fructose-bisphosphate aldolase Fba                                                                                                                                                           |
| ncbi-gi:5711673:mtu:Rv0489  | gpm1        | Probable phosphoglycerate mutase 1 Gpm1 (phosphoglyceromutase) (PGAM) (BPG-dependent PGAM)                                                                                                            |
| ncbi-gi:1560764             | mtu:Rv0500  | Probable pyrroline-5-carboxylate reductase ProC (P5CR) (P5C reductase)                                                                                                                                |
| ncbi-gi:1560799:mtu:Rv0858c | dapC        | Probable N-succinyldiaminopimelate aminotransferase DapC (DAP-at)                                                                                                                                     |
| ncbi-gi:1560802:mtu:Rv0884c | serC        | Possible phosphoserine aminotransferase SerC (PSAT)                                                                                                                                                   |
| ncbi-gi:1560802:mtu:Rv0889c | citA        | Probable citrate synthase II CitA                                                                                                                                                                     |
| ncbi-gi:1560803:mtu:Rv0896  | gltA2       | Probable citrate synthase I GltA2                                                                                                                                                                     |
| ncbi-gi:1560815:mtu:Rv1017c | prsA        | Probable ribose-phosphate pyrophosphokinase PrsA (phosphoribosyl pyrophosphate synthetase) (PRPP synthetase)                                                                                          |
| ncbi-gi:1560816:mtu:Rv1023  | eno         | Probable enolase Eno                                                                                                                                                                                  |
| ncbi-gi:5711682:mtu:Rv1077  | cbs         | Probable cystathionine beta-synthase Cbs (serine sulfhydrase) (beta-thionase) (hemoprotein H-450)                                                                                                     |
| ncbi-gi:1560821:mtu:Rv1079  | metB        | Cystathionine gamma-synthase MetB (CGS) (O-succinylhomoserine [thiol]-lyase)                                                                                                                          |
| ncbi-gi:4488247:mtu:Rv1093  | glyA1       | Serine hydroxymethyltransferase 1 GlyA1                                                                                                                                                               |
| ncbi-gi:1560827:mtu:Rv1133c | metE        | Probable 5-methyltetrahydropteroyltrimethylglutamate--homocysteine methyltransferase MetE (methionine synthase, vitamin-B12 independent isozyme)                                                      |
| ncbi-gi:1560834             | mtu:Rv1201c | Tetrahydrodipicolinate N-succinyltransferase DapD                                                                                                                                                     |
| ncbi-gi:1560843:mtu:Rv1295  | thrC        | Threonine synthase ThrC (ts)                                                                                                                                                                          |
| ncbi-gi:1560853             | mtu:Rv1392  | Probable S-adenosylmethionine synthetase MetK (mat) (AdoMet synthetase) (methionine adenosyltransferase)                                                                                              |
| ncbi-gi:1560857:mtu:Rv1436  | gap         | Probable glyceraldehyde 3-phosphate dehydrogenase Gap (GAPDH)                                                                                                                                         |
| ncbi-gi:1560857:mtu:Rv1437  | pgk         | Probable phosphoglycerate kinase Pkg                                                                                                                                                                  |
| ncbi-gi:1560857:mtu:Rv1438  | tpi         | Probable triosephosphate isomerase Tpi (TIM)                                                                                                                                                          |
| ncbi-gi:1560858:mtu:Rv1448c | tal         | Probable transaldolase Tal                                                                                                                                                                            |
| ncbi-gi:1560858:mtu:Rv1449c | tkt         | Transketolase Tkt (TK)                                                                                                                                                                                |
| ncbi-gi:1560861:mtu:Rv1475c | acn         | Probable iron-regulated aconitate hydratase Acn (citrate hydro-lyase) (aconitase)                                                                                                                     |
| ncbi-gi:1560869:mtu:Rv1559  | ilvA        | Probable threonine dehydratase IlvA                                                                                                                                                                   |
| ncbi-gi:1560873:mtu:Rv1601  | hisB        | Probable imidazole glycerol-phosphate dehydratase HisB                                                                                                                                                |
| ncbi-gi:1560874             | mtu:Rv1603  | Probable phosphoribosylformimino-5-aminoimidazole carboxamide ribotide isomerase HisA                                                                                                                 |
| ncbi-gi:1560874:mtu:Rv1611  | trpC        | Probable indole-3-glycerol phosphate synthase TrpC                                                                                                                                                    |
| ncbi-gi:1560875:mtu:Rv1617  | pykA        | Probable pyruvate kinase PykA                                                                                                                                                                         |
| ncbi-gi:1560879:mtu:Rv1654  | argB        | Probable acetylglutamate kinase ArgB                                                                                                                                                                  |
| ncbi-gi:1560879:mtu:Rv1655  | argD        | Probable acetylornithine aminotransferase ArgD                                                                                                                                                        |
| ncbi-gi:1560879:mtu:Rv1656  | argF        | Probable ornithine carbamoyltransferase, anabolic ArgF                                                                                                                                                |
| ncbi-gi:1560916:mtu:Rv2029c | pfkB        | 6-phosphofructokinase PfkB (phosphohexokinase) (phosphofructokinase)                                                                                                                                  |
| ncbi-gi:1560925:mtu:Rv2121c | hisG        | ATP phosphoribosyltransferase HisG                                                                                                                                                                    |
| ncbi-gi:1560931:mtu:Rv2178c | aroG        | 3-deoxy-D-arabino-heptulosonate 7-phosphate synthase AroG (DAHP synthetase, phenylalanine-repressible)                                                                                                |
| ncbi-gi:1560934:mtu:Rv2210c | ilvE        | Branched-chain amino acid transaminase IlvE                                                                                                                                                           |
| ncbi-gi:1560935:mtu:Rv2220  | glnA1       | Glutamine synthetase GlnA1 (glutamine synthase) (GS-I)                                                                                                                                                |
| ncbi-gi:1560935:mtu:Rv2222c | glnA2       | Probable glutamine synthetase GlnA2 (glutamine synthase) (GS-II)                                                                                                                                      |
| ncbi-gi:5711697:mtu:Rv2334  | cysK1       | Cysteine synthase a CysK1 (O-acetylserine sulfhydrylase A) (O-acetylserine (thiol)-lyase A) (CSASE A)                                                                                                 |
| ncbi-gi:1560955:mtu:Rv2419c | gpgP        | Glucosyl-3-phosphoglycerate phosphatase GpgP                                                                                                                                                          |
| ncbi-gi:5711699:mtu:Rv2465c | rpiB        | Ribose-5-phosphate isomerase                                                                                                                                                                          |
| ncbi-gi:1560967:mtu:Rv2537c | aroD        | 3-dehydroquininate dehydratase AroD (AROQ) (3-dehydroquinase) (type II dhqase)                                                                                                                        |
| ncbi-gi:1560967:mtu:Rv2538c | aroB        | 3-dehydroquininate synthase AroB                                                                                                                                                                      |
| ncbi-gi:1560967:mtu:Rv2540c | aroF        | Probable chorismate synthase AroF (5-enolpyruvylshikimate-3-phosphate phospholyase)                                                                                                                   |
| ncbi-gi:1560986:mtu:Rv2726c | dapF        | Probable diaminopimelate epimerase DapF (DAP epimerase)                                                                                                                                               |
| ncbi-gi:1560989:mtu:Rv2753c | dapA        | Probable dihydrodipicolinate synthase DapA (DHDPS) (dihydrodipicolinate synthetase)                                                                                                                   |
| ncbi-gi:1560991:mtu:Rv2773c | dapB        | Dihydrodipicolinate reductase DapB (DHPR)                                                                                                                                                             |
| ncbi-gi:1561010:mtu:Rv2967c | pca         | Probable pyruvate carboxylase Pca (pyruvic carboxylase)                                                                                                                                               |
| ncbi-gi:1561013:mtu:Rv2995c | leuB        | Probable 3-isopropylmalate dehydrogenase LeuB (beta-IPM dehydrogenase) (IMDH) (3-IPM-DH)                                                                                                              |
| ncbi-gi:5711704:mtu:Rv2996c | serA1       | Probable D-3-phosphoglycerate dehydrogenase SerA1 (PGDH)                                                                                                                                              |
| ncbi-gi:4488247:mtu:Rv3001c | ilvC        | Probable KETOL-acid reductoisomerase IlvC (acetohydroxy-acid isomeroreductase) (alpha-keto-beta-hydroxylacil reductoisomerase)                                                                        |
| ncbi-gi:1561013:mtu:Rv3002c | ilvN        | Probable acetolactate synthase (small subunit) IlvN (acetohydroxy-acid synthase) (AHAS) (ALS)                                                                                                         |
| ncbi-gi:5711704:mtu:Rv3003c | ilvB1       | Acetolactate synthase (large subunit) IlvB1 (acetohydroxy-acid synthase)                                                                                                                              |
| ncbi-gi:1561014:mtu:Rv3010c | pfkA        | Probable 6-phosphofructokinase PfkA (phosphohexokinase) (phosphofructokinase)                                                                                                                         |
| ncbi-gi:1561036:mtu:Rv3227  | aroA        | 3-phosphoshikimate 1-carboxyvinyltransferase AroA (5-enolpyruvylshikimate-3-phosphate synthase) (EPSP synthase) (EPSPS)                                                                               |
| ncbi-gi:1561047:mtu:Rv3339c | icd1        | Probable isocitrate dehydrogenase [NADP] Icd1 (oxalosuccinate decarboxylase) (IDH) (NADP+-specific ICDH) (IDP)                                                                                        |
| ncbi-gi:3454620:mtu:Rv3710  | leuA        | 2-isopropylmalate synthase LeuA (alpha-isopropylmalate synthase) (alpha-IPM synthetase) (IPMS)                                                                                                        |
| ncbi-gi:1561097:mtu:Rv3838c | pheA        | Prephenate dehydratase PheA                                                                                                                                                                           |
| ncbi-gi:1561099:mtu:Rv3858c | gltD        | Probable NADH-dependent glutamate synthase (small subunit) GltD (L-glutamate synthase) (L-glutamate synthetase) (NADH-glutamate synthase) (glutamate synthase (NADH)) (GLTS beta chain) (NADPH-GOGAT) |
| ncbi-gi:1561099:mtu:Rv3859c | gltB        | Probable ferredoxin-dependent glutamate synthase [NADPH] (large subunit) GltB (L-glutamate synthase) (L-glutamate synthetase) (NADH-glutamate synthase) (glutamate synthase (NADH))(NADPH-GOGAT)      |

#### mtu03010 Ribosome - Mycobacterium tuberculosis H37Rv (36)

|                            |       |                                   |
|----------------------------|-------|-----------------------------------|
| ncbi-gi:1560719:mtu:Rv0053 | rpsF  | 30S ribosomal protein S6 RpsF     |
| ncbi-gi:5711668:mtu:Rv0055 | rpsR1 | 30S ribosomal protein S18-1 RpsR1 |

|                             |             |                                                                            |                                |
|-----------------------------|-------------|----------------------------------------------------------------------------|--------------------------------|
| ncbi-gi:1560719:mtu:Rv0056  | rplI        | 50S ribosomal protein L9 RplI                                              |                                |
| ncbi-gi:5711676:mtu:Rv0634B | rpmG2       | 50S ribosomal protein L33 RpmG2                                            |                                |
| ncbi-gi:1560778:mtu:Rv0640  | rplK        | 50S ribosomal protein L11 RplK                                             |                                |
| ncbi-gi:1560778             | mtu:Rv0641  | rplA                                                                       | 50S ribosomal protein L1 RplA  |
| ncbi-gi:1560779             | mtu:Rv0651  | rplJ                                                                       | 50S ribosomal protein L10 RplJ |
| ncbi-gi:1560779:mtu:Rv0652  | rplL        | 50S ribosomal protein L7/L12 RplL (SA1)                                    |                                |
| ncbi-gi:1560782:mtu:Rv0683  | rpsG        | 30S ribosomal protein S7 RpsG                                              |                                |
| ncbi-gi:1560784:mtu:Rv0700  | rpsJ        | 30S ribosomal protein S10 RpsJ (transcription antitermination factor NusE) |                                |
| ncbi-gi:1560784             | mtu:Rv0701  | rplC                                                                       | 50S ribosomal protein L3 RplC  |
| ncbi-gi:1560784:mtu:Rv0702  | rplD        | 50S ribosomal protein L4 RplD                                              |                                |
| ncbi-gi:1560784:mtu:Rv0704  | rplB        | 50S ribosomal protein L2 RplB                                              |                                |
| ncbi-gi:1560784:mtu:Rv0705  | rpsS        | 30S ribosomal protein S19 RpsS                                             |                                |
| ncbi-gi:1560784:mtu:Rv0706  | rplV        | 50S ribosomal protein L22 RplV                                             |                                |
| ncbi-gi:1560784:mtu:Rv0707  | rpsC        | 30S ribosomal protein S3 RpsC                                              |                                |
| ncbi-gi:1560785:mtu:Rv0714  | rplN        | 50S ribosomal protein L14 RplN                                             |                                |
| ncbi-gi:1560785:mtu:Rv0715  | rplX        | 50S ribosomal protein L24 RplX                                             |                                |
| ncbi-gi:1560785:mtu:Rv0716  | rplE        | 50S ribosomal protein L5 RplE                                              |                                |
| ncbi-gi:1560785:mtu:Rv0718  | rpsH        | 30S ribosomal protein S8 RpsH                                              |                                |
| ncbi-gi:1560785:mtu:Rv0719  | rplF        | 50S ribosomal protein L6 RplF                                              |                                |
| ncbi-gi:1560786:mtu:Rv0722  | rpmD        | 50S ribosomal protein L30 RpmD                                             |                                |
| ncbi-gi:1560786:mtu:Rv0723  | rplO        | 50S ribosomal protein L15 RplO                                             |                                |
| ncbi-gi:5711680:mtu:Rv0979A | rpmF        | 50S ribosomal protein L32 RpmF                                             |                                |
| ncbi-gi:1560815:mtu:Rv1015c | rplY        | 50S ribosomal protein L25 RplY                                             |                                |
| ncbi-gi:1560876:mtu:Rv1630  | rpsA        | 30S ribosomal protein S1 RpsA                                              |                                |
| ncbi-gi:1560954:mtu:Rv2412  | rpsT        | 30S ribosomal protein S20 RpsT                                             |                                |
| ncbi-gi:1560957:mtu:Rv2442c | rplU        | 50S ribosomal protein L21 RplU                                             |                                |
| ncbi-gi:1560992:mtu:Rv2785c | rpsO        | 30S ribosomal protein S15 RpsO                                             |                                |
| ncbi-gi:1561002:mtu:Rv2890c | rpsB        | 30S ribosomal protein S2 RpsB                                              |                                |
| ncbi-gi:1561004             | mtu:Rv2904c | rplS                                                                       | 50S ribosomal protein L19 RplS |
| ncbi-gi:1561004:mtu:Rv2909c | rpsP        | 30S ribosomal protein S16 RpsP                                             |                                |
| ncbi-gi:1561057:mtu:Rv3442c | rpsI        | 30S ribosomal protein S9 RpsI                                              |                                |
| ncbi-gi:1561057:mtu:Rv3443c | rplM        | 50S ribosomal protein L13 RplM                                             |                                |
| ncbi-gi:1561059:mtu:Rv3458c | rpsD        | 30S ribosomal protein S4 RpsD                                              |                                |
| ncbi-gi:1561059:mtu:Rv3459c | rpsK        | 30S ribosomal protein S11 RpsK                                             |                                |

#### mtu00280 Valine, leucine and isoleucine degradation - Mycobacterium tuberculosis H37Rv (32)

|                             |             |                                                                                                                                                                                  |                                                                                                                                                                    |
|-----------------------------|-------------|----------------------------------------------------------------------------------------------------------------------------------------------------------------------------------|--------------------------------------------------------------------------------------------------------------------------------------------------------------------|
| ncbi-gi:1560727:mtu:Rv0131c | fadE1       | Probable acyl-CoA dehydrogenase FadE1                                                                                                                                            |                                                                                                                                                                    |
| ncbi-gi:1560729:mtu:Rv0154c | fadE2       | Probable acyl-CoA dehydrogenase FadE2                                                                                                                                            |                                                                                                                                                                    |
| ncbi-gi:1560736:mtu:Rv0222  | echA1       | Probable enoyl-CoA hydratase EchA1 (enoyl hydrase) (unsaturated acyl-CoA hydratase) (crotonase)                                                                                  |                                                                                                                                                                    |
| ncbi-gi:1560737:mtu:Rv0231  | fadE4       | Probable acyl-CoA dehydrogenase FadE4                                                                                                                                            |                                                                                                                                                                    |
| ncbi-gi:1560738:mtu:Rv0243  | fadA2       | Probable acetyl-CoA acyltransferase FadA2 (3-ketoacyl-CoA thiolase) (beta-ketothiolase)                                                                                          |                                                                                                                                                                    |
| ncbi-gi:1560760:mtu:Rv0462  | lpdC        | Dihydrolipoamide dehydrogenase LpdC (lipoamide reductase (NADH)) (lipoyl dehydrogenase) (dihydrolipoyl dehydrogenase) (diaphorase)                                               |                                                                                                                                                                    |
| ncbi-gi:1560777:mtu:Rv0632c | echA3       | Probable enoyl-CoA hydratase EchA3 (enoyl hydrase) (unsaturated acyl-CoA hydratase) (crotonase)                                                                                  |                                                                                                                                                                    |
| ncbi-gi:5711676:mtu:Rv0675  | echA5       | Probable enoyl-CoA hydratase EchA5 (enoyl hydrase) (unsaturated acyl-CoA hydratase) (crotonase)                                                                                  |                                                                                                                                                                    |
| ncbi-gi:1560789:mtu:Rv0753c | mmsA        | Probable methylmalonate-semialdehyde dehydrogenase MmsA (methylmalonic acid semialdehyde dehydrogenase) (MMSDH)                                                                  |                                                                                                                                                                    |
| ncbi-gi:5711678:mtu:Rv0794c | lpdB        | Probable oxidoreductase                                                                                                                                                          |                                                                                                                                                                    |
| ncbi-gi:1560799:mtu:Rv0859  | fadA        | Possible acyl-CoA thiolase FadA                                                                                                                                                  |                                                                                                                                                                    |
| ncbi-gi:1560800:mtu:Rv0860  | fadB        | Probable fatty oxidation protein FadB                                                                                                                                            |                                                                                                                                                                    |
| ncbi-gi:1560804:mtu:Rv0905  | echA6       | Possible enoyl-CoA hydratase EchA6 (enoyl hydrase) (unsaturated acyl-CoA hydratase) (crotonase)                                                                                  |                                                                                                                                                                    |
| ncbi-gi:1560811             | mtu:Rv0971c | echA7                                                                                                                                                                            | Probable enoyl-CoA hydratase EchA7 (enoyl hydrase) (unsaturated acyl-CoA hydratase) (crotonase)                                                                    |
| ncbi-gi:1560821:mtu:Rv1070c | echA8       | Probable enoyl-CoA hydratase EchA8 (enoyl hydrase) (unsaturated acyl-CoA hydratase) (crotonase)                                                                                  |                                                                                                                                                                    |
| ncbi-gi:1560821             | mtu:Rv1071c | echA9                                                                                                                                                                            | Possible enoyl-CoA hydratase EchA9 (enoyl hydrase) (unsaturated acyl-CoA hydratase) (crotonase)                                                                    |
| ncbi-gi:1560821:mtu:Rv1074c | fadA3       | Probable beta-ketoacyl CoA thiolase FadA3                                                                                                                                        |                                                                                                                                                                    |
| ncbi-gi:1560846:mtu:Rv1323  | fadA4       | Probable acetyl-CoA acetyltransferase FadA4 (acetoacetyl-CoA thiolase)                                                                                                           |                                                                                                                                                                    |
| ncbi-gi:1560863:mtu:Rv1492  | mutA        | Probable methylmalonyl-CoA mutase small subunit MutA (MCM)                                                                                                                       |                                                                                                                                                                    |
| ncbi-gi:1560863             | mtu:Rv1493  | mutB                                                                                                                                                                             | Probable methylmalonyl-CoA mutase large subunit MutB (MCM)                                                                                                         |
| ncbi-gi:1560934:mtu:Rv2210c | ilvE        | Branched-chain amino acid transaminase IlvE                                                                                                                                      |                                                                                                                                                                    |
| ncbi-gi:1560963:mtu:Rv2502c | accD1       | Probable acetyl-/propionyl-CoA carboxylase (beta subunit) AccD1                                                                                                                  |                                                                                                                                                                    |
| ncbi-gi:1560964:mtu:Rv2503c | scoB        | Probable succinyl-CoA:3-ketoacid-coenzyme A transferase (beta subunit) ScoB (3-oxo-acid:CoA transferase) (OXCT B) (succinyl CoA:3-oxoacid CoA-transferase)                       |                                                                                                                                                                    |
| ncbi-gi:1560964             | mtu:Rv2504c | scoA                                                                                                                                                                             | Probable succinyl-CoA:3-ketoacid-coenzyme A transferase (alpha subunit) ScoA (3-oxo acid:CoA transferase) (OXCT A) (succinyl-CoA:3-oxoacid-coenzyme A transferase) |
| ncbi-gi:1560972:mtu:Rv2589  | gabT        | 4-aminobutyrate aminotransferase GabT (gamma-amino-N-butyrate transaminase) (GABA transaminase) (glutamate:succinic semialdehyde transaminase) (GABA aminotransferase) (GABA-at) |                                                                                                                                                                    |
| ncbi-gi:1560981:mtu:Rv2679  | echA15      | Probable enoyl-CoA hydratase EchA15 (enoyl hydrase) (unsaturated acyl-CoA hydratase) (crotonase)                                                                                 |                                                                                                                                                                    |
| ncbi-gi:4488247:mtu:Rv2790c | ltp1        | Probable lipid-transfer protein Ltp1                                                                                                                                             |                                                                                                                                                                    |
| ncbi-gi:1561027:mtu:Rv3140  | fadE23      | Probable acyl-CoA dehydrogenase FadE23                                                                                                                                           |                                                                                                                                                                    |
| ncbi-gi:1561041:mtu:Rv3280  | accD5       | Probable propionyl-CoA carboxylase beta chain 5 AccD5 (pccase) (propanoyl-CoA:carbon dioxide ligase)                                                                             |                                                                                                                                                                    |
| ncbi-gi:1561065:mtu:Rv3516  | echA19      | Possible enoyl-CoA hydratase EchA19 (enoyl hydrase) (unsaturated acyl-CoA hydratase) (crotonase)                                                                                 |                                                                                                                                                                    |
| ncbi-gi:1561069:mtu:Rv3556c | fadA6       | Probable acetyl-CoA acetyltransferase FadA6 (acetoacetyl-CoA thiolase)                                                                                                           |                                                                                                                                                                    |
| ncbi-gi:1561091:mtu:Rv3774  | echA21      | Possible enoyl-CoA hydratase EchA21 (enoyl hydrase) (unsaturated acyl-CoA hydratase) (crotonase)                                                                                 |                                                                                                                                                                    |

#### mtu00640 Propanoate metabolism - Mycobacterium tuberculosis H37Rv (29)

|                             |       |                                                                                                                 |
|-----------------------------|-------|-----------------------------------------------------------------------------------------------------------------|
| ncbi-gi:1560727:mtu:Rv0131c | fadE1 | Probable acyl-CoA dehydrogenase FadE1                                                                           |
| ncbi-gi:1560729:mtu:Rv0154c | fadE2 | Probable acyl-CoA dehydrogenase FadE2                                                                           |
| ncbi-gi:1560736:mtu:Rv0222  | echA1 | Probable enoyl-CoA hydratase EchA1 (enoyl hydrase) (unsaturated acyl-CoA hydratase) (crotonase)                 |
| ncbi-gi:1560737:mtu:Rv0231  | fadE4 | Probable acyl-CoA dehydrogenase FadE4                                                                           |
| ncbi-gi:1560738:mtu:Rv0243  | fadA2 | Probable acetyl-CoA acyltransferase FadA2 (3-ketoacyl-CoA thiolase) (beta-ketothiolase)                         |
| ncbi-gi:1560754:mtu:Rv0408  | pta   | Probable phosphate acetyltransferase Pta (phosphotransacetylase)                                                |
| ncbi-gi:1560777:mtu:Rv0632c | echA3 | Probable enoyl-CoA hydratase EchA3 (enoyl hydrase) (unsaturated acyl-CoA hydratase) (crotonase)                 |
| ncbi-gi:5711676:mtu:Rv0675  | echA5 | Probable enoyl-CoA hydratase EchA5 (enoyl hydrase) (unsaturated acyl-CoA hydratase) (crotonase)                 |
| ncbi-gi:1560789:mtu:Rv0753c | mmsA  | Probable methylmalonate-semialdehyde dehydrogenase MmsA (methylmalonic acid semialdehyde dehydrogenase) (MMSDH) |
| ncbi-gi:1560799:mtu:Rv0859  | fadA  | Possible acyl-CoA thiolase FadA                                                                                 |
| ncbi-gi:1560800:mtu:Rv0860  | fadB  | Probable fatty oxidation protein FadB                                                                           |
| ncbi-gi:1560804:mtu:Rv0905  | echA6 | Possible enoyl-CoA hydratase EchA6 (enoyl hydrase) (unsaturated acyl-CoA hydratase) (crotonase)                 |



|                 |             |        |                                                                                                                                                                                                                                       |
|-----------------|-------------|--------|---------------------------------------------------------------------------------------------------------------------------------------------------------------------------------------------------------------------------------------|
| ncbi-gi:1560809 | mtu:Rv0951  | sucC   | Probable succinyl-CoA synthetase (beta chain) SucC (SCS-beta)                                                                                                                                                                         |
| ncbi-gi:1560809 | mtu:Rv0952  | sucD   | Probable succinyl-CoA synthetase (alpha chain) SucD (SCS-alpha)                                                                                                                                                                       |
| ncbi-gi:1560811 | mtu:Rv0971c | echA7  | Probable enoyl-CoA hydratase EchA7 (enoyl hydrase) (unsaturated acyl-CoA hydratase) (crotonase)                                                                                                                                       |
| ncbi-gi:1560821 | mtu:Rv1070c | echA8  | Probable enoyl-CoA hydratase EchA8 (enoyl hydrase) (unsaturated acyl-CoA hydratase) (crotonase)                                                                                                                                       |
| ncbi-gi:1560821 | mtu:Rv1071c | echA9  | Possible enoyl-CoA hydratase EchA9 (enoyl hydrase) (unsaturated acyl-CoA hydratase) (crotonase)                                                                                                                                       |
| ncbi-gi:1560821 | mtu:Rv1074c | fadA3  | Probable beta-ketoacyl CoA thiolase FadA3                                                                                                                                                                                             |
| ncbi-gi:1560846 | mtu:Rv1323  | fadA4  | Probable acetyl-CoA acetyltransferase FadA4 (acetoacetyl-CoA thiolase)                                                                                                                                                                |
| ncbi-gi:1560863 | mtu:Rv1492  | mutA   | Probable methylmalonyl-CoA mutase small subunit MutA (MCM)                                                                                                                                                                            |
| ncbi-gi:1560863 | mtu:Rv1493  | mutB   | Probable methylmalonyl-CoA mutase large subunit MutB (MCM)                                                                                                                                                                            |
| ncbi-gi:1560972 | mtu:Rv2589  | gabT   | 4-aminobutyrate aminotransferase GabT (gamma-amino-N-butyrate transaminase) (GABA transaminase) (glutamate:succinic semialdehyde transaminase) (GABA aminotransferase) (GABA-at)                                                      |
| ncbi-gi:1560981 | mtu:Rv2679  | echA15 | Probable enoyl-CoA hydratase EchA15 (enoyl hydrase) (unsaturated acyl-CoA hydratase) (crotonase)                                                                                                                                      |
| ncbi-gi:1561027 | mtu:Rv3140  | fadE23 | Probable acyl-CoA dehydrogenase FadE23                                                                                                                                                                                                |
| ncbi-gi:1561041 | mtu:Rv3280  | accD5  | Probable propionyl-CoA carboxylase beta chain 5 AccD5 (pccase) (propanoyl-CoA:carbon dioxide ligase)                                                                                                                                  |
| ncbi-gi:1561065 | mtu:Rv3516  | echA19 | Possible enoyl-CoA hydratase EchA19 (enoyl hydrase) (unsaturated acyl-CoA hydratase) (crotonase)                                                                                                                                      |
| ncbi-gi:1561069 | mtu:Rv3556c | fadA6  | Probable acetyl-CoA acetyltransferase FadA6 (acetoacetyl-CoA thiolase)                                                                                                                                                                |
| ncbi-gi:1561080 | mtu:Rv3667  | acs    | Acetyl-coenzyme A synthetase Acs (acetate-CoA ligase) (acetyl-CoA synthetase) (acetyl-CoA synthase) (acyl-activating enzyme) (acetate thiokinase) (acetyl-activating enzyme) (acetate-coenzyme A ligase) (acetyl-coenzyme A synthase) |
| ncbi-gi:1561091 | mtu:Rv3774  | echA21 | Possible enoyl-CoA hydratase EchA21 (enoyl hydrase) (unsaturated acyl-CoA hydratase) (crotonase)                                                                                                                                      |

#### mtu00650 Butanoate metabolism - Mycobacterium tuberculosis H37Rv (29)

|                 |             |        |                                                                                                                                                                                  |
|-----------------|-------------|--------|----------------------------------------------------------------------------------------------------------------------------------------------------------------------------------|
| ncbi-gi:1560736 | mtu:Rv0222  | echA1  | Probable enoyl-CoA hydratase EchA1 (enoyl hydrase) (unsaturated acyl-CoA hydratase) (crotonase)                                                                                  |
| ncbi-gi:5711670 | mtu:Rv0234c | gabD1  | Succinate-semialdehyde dehydrogenase [NADP+] dependent (SSDH) GabD1                                                                                                              |
| ncbi-gi:1560738 | mtu:Rv0243  | fadA2  | Probable acetyl-CoA acyltransferase FadA2 (3-ketoacyl-CoA thiolase) (beta-ketothiolase)                                                                                          |
| ncbi-gi:1560738 | mtu:Rv0247c |        | Probable succinate dehydrogenase [iron-sulfur subunit] (succinic dehydrogenase)                                                                                                  |
| ncbi-gi:1560738 | mtu:Rv0248c |        | Probable succinate dehydrogenase [iron-sulfur subunit] (succinic dehydrogenase)                                                                                                  |
| ncbi-gi:1560760 | mtu:Rv0468  | fadB2  | 3-hydroxybutyryl-CoA dehydrogenase FadB2 (beta-hydroxybutyryl-CoA dehydrogenase) (BHBD)                                                                                          |
| ncbi-gi:1560777 | mtu:Rv0632c | echA3  | Probable enoyl-CoA hydratase EchA3 (enoyl hydrase) (unsaturated acyl-CoA hydratase) (crotonase)                                                                                  |
| ncbi-gi:5711676 | mtu:Rv0675  | echA5  | Probable enoyl-CoA hydratase EchA5 (enoyl hydrase) (unsaturated acyl-CoA hydratase) (crotonase)                                                                                  |
| ncbi-gi:1560799 | mtu:Rv0859  | fadA   | Possible acyl-CoA thiolase FadA                                                                                                                                                  |
| ncbi-gi:1560800 | mtu:Rv0860  | fadB   | Probable fatty oxidation protein FadB                                                                                                                                            |
| ncbi-gi:1560804 | mtu:Rv0905  | echA6  | Possible enoyl-CoA hydratase EchA6 (enoyl hydrase) (unsaturated acyl-CoA hydratase) (crotonase)                                                                                  |
| ncbi-gi:1560811 | mtu:Rv0971c | echA7  | Probable enoyl-CoA hydratase EchA7 (enoyl hydrase) (unsaturated acyl-CoA hydratase) (crotonase)                                                                                  |
| ncbi-gi:1560821 | mtu:Rv1070c | echA8  | Probable enoyl-CoA hydratase EchA8 (enoyl hydrase) (unsaturated acyl-CoA hydratase) (crotonase)                                                                                  |
| ncbi-gi:1560821 | mtu:Rv1071c | echA9  | Possible enoyl-CoA hydratase EchA9 (enoyl hydrase) (unsaturated acyl-CoA hydratase) (crotonase)                                                                                  |
| ncbi-gi:1560821 | mtu:Rv1074c | fadA3  | Probable beta-ketoacyl CoA thiolase FadA3                                                                                                                                        |
| ncbi-gi:1560846 | mtu:Rv1323  | fadA4  | Probable acetyl-CoA acetyltransferase FadA4 (acetoacetyl-CoA thiolase)                                                                                                           |
| ncbi-gi:5711690 | mtu:Rv1731  | gabD2  | Possible succinate-semialdehyde dehydrogenase [NADP+] dependent (SSDH) GabD2                                                                                                     |
| ncbi-gi:1560964 | mtu:Rv2503c | scoB   | Probable succinyl-CoA:3-ketoacid-coenzyme A transferase (beta subunit) ScoB (3-oxo-acid:CoA transferase) (OXCT B) (succinyl CoA:3-oxoacid CoA-transferase)                       |
| ncbi-gi:1560964 | mtu:Rv2504c | scoA   | Probable succinyl-CoA:3-ketoacid-coenzyme A transferase (alpha subunit) ScoA (3-oxo acid:CoA transferase) (OXCT A) (succinyl-CoA:3-oxoacid-coenzyme A transferase)               |
| ncbi-gi:1560972 | mtu:Rv2589  | gabT   | 4-aminobutyrate aminotransferase GabT (gamma-amino-N-butyrate transaminase) (GABA transaminase) (glutamate:succinic semialdehyde transaminase) (GABA aminotransferase) (GABA-at) |
| ncbi-gi:1560981 | mtu:Rv2679  | echA15 | Probable enoyl-CoA hydratase EchA15 (enoyl hydrase) (unsaturated acyl-CoA hydratase) (crotonase)                                                                                 |
| ncbi-gi:1561013 | mtu:Rv3002c | ilvN   | Probable acetolactate synthase (small subunit) IlvN (acetohydroxy-acid synthase) (AHAS) (ALS)                                                                                    |
| ncbi-gi:5711704 | mtu:Rv3003c | ilvB1  | Acetolactate synthase (large subunit) IlvB1 (acetohydroxy-acid synthase)                                                                                                         |
| ncbi-gi:1561045 | mtu:Rv3318  | sdhA   | Probable succinate dehydrogenase (flavoprotein subunit) SdhA (succinic dehydrogenase) (fumarate reductase) (fumarate dehydrogenase) (fumaric hydrogenase)                        |
| ncbi-gi:1561056 | mtu:Rv3432c | gadB   | Probable glutamate decarboxylase GadB                                                                                                                                            |
| ncbi-gi:1561065 | mtu:Rv3516  | echA19 | Possible enoyl-CoA hydratase EchA19 (enoyl hydrase) (unsaturated acyl-CoA hydratase) (crotonase)                                                                                 |
| ncbi-gi:1561067 | mtu:Rv3535c | hsaG   | Probable acetaldehyde dehydrogenase (acetaldehyde dehydrogenase [acetylating])                                                                                                   |
| ncbi-gi:1561069 | mtu:Rv3556c | fadA6  | Probable acetyl-CoA acetyltransferase FadA6 (acetoacetyl-CoA thiolase)                                                                                                           |
| ncbi-gi:1561091 | mtu:Rv3774  | echA21 | Possible enoyl-CoA hydratase EchA21 (enoyl hydrase) (unsaturated acyl-CoA hydratase) (crotonase)                                                                                 |

#### mtu01212 Fatty acid metabolism - Mycobacterium tuberculosis H37Rv (29)

|                 |             |        |                                                                                                                                                         |
|-----------------|-------------|--------|---------------------------------------------------------------------------------------------------------------------------------------------------------|
| ncbi-gi:1560727 | mtu:Rv0131c | fadE1  | Probable acyl-CoA dehydrogenase FadE1                                                                                                                   |
| ncbi-gi:1560729 | mtu:Rv0154c | fadE2  | Probable acyl-CoA dehydrogenase FadE2                                                                                                                   |
| ncbi-gi:1560736 | mtu:Rv0222  | echA1  | Probable enoyl-CoA hydratase EchA1 (enoyl hydrase) (unsaturated acyl-CoA hydratase) (crotonase)                                                         |
| ncbi-gi:1560737 | mtu:Rv0231  | fadE4  | Probable acyl-CoA dehydrogenase FadE4                                                                                                                   |
| ncbi-gi:1560738 | mtu:Rv0242c | fabG4  | Probable 3-oxoacyl-[acyl-carrier protein] reductase FabG4 (3-ketoacyl-acyl carrier protein reductase)                                                   |
| ncbi-gi:1560738 | mtu:Rv0243  | fadA2  | Probable acetyl-CoA acyltransferase FadA2 (3-ketoacyl-CoA thiolase) (beta-ketothiolase)                                                                 |
| ncbi-gi:1560777 | mtu:Rv0632c | echA3  | Probable enoyl-CoA hydratase EchA3 (enoyl hydrase) (unsaturated acyl-CoA hydratase) (crotonase)                                                         |
| ncbi-gi:5711676 | mtu:Rv0675  | echA5  | Probable enoyl-CoA hydratase EchA5 (enoyl hydrase) (unsaturated acyl-CoA hydratase) (crotonase)                                                         |
| ncbi-gi:5711678 | mtu:Rv0824c | desA1  | Probable acyl-[acyl-carrier protein] desaturase DesA1 (acyl-[ACP] desaturase) (stearoyl-ACP desaturase) (protein Des)                                   |
| ncbi-gi:1560799 | mtu:Rv0859  | fadA   | Possible acyl-CoA thiolase FadA                                                                                                                         |
| ncbi-gi:1560800 | mtu:Rv0860  | fadB   | Probable fatty oxidation protein FadB                                                                                                                   |
| ncbi-gi:1560804 | mtu:Rv0905  | echA6  | Possible enoyl-CoA hydratase EchA6 (enoyl hydrase) (unsaturated acyl-CoA hydratase) (crotonase)                                                         |
| ncbi-gi:1560811 | mtu:Rv0971c | echA7  | Probable enoyl-CoA hydratase EchA7 (enoyl hydrase) (unsaturated acyl-CoA hydratase) (crotonase)                                                         |
| ncbi-gi:1560821 | mtu:Rv1070c | echA8  | Probable enoyl-CoA hydratase EchA8 (enoyl hydrase) (unsaturated acyl-CoA hydratase) (crotonase)                                                         |
| ncbi-gi:1560821 | mtu:Rv1071c | echA9  | Possible enoyl-CoA hydratase EchA9 (enoyl hydrase) (unsaturated acyl-CoA hydratase) (crotonase)                                                         |
| ncbi-gi:1560821 | mtu:Rv1074c | fadA3  | Probable beta-ketoacyl CoA thiolase FadA3                                                                                                               |
| ncbi-gi:1560823 | mtu:Rv1094  | desA2  | Possible acyl-[acyl-carrier protein] desaturase DesA2 (acyl-[ACP] desaturase) (stearoyl-ACP desaturase)                                                 |
| ncbi-gi:1560846 | mtu:Rv1323  | fadA4  | Probable acetyl-CoA acetyltransferase FadA4 (acetoacetyl-CoA thiolase)                                                                                  |
| ncbi-gi:1560849 | mtu:Rv1350  | fabG2  | Probable 3-oxoacyl-[acyl-carrier protein] reductase FabG2 (3-ketoacyl-acyl carrier protein reductase)                                                   |
| ncbi-gi:1560932 | mtu:Rv2187  | fadD15 | Long-chain-fatty-acid-CoA ligase FadD15 (fatty-acid-CoA synthetase) (fatty-acid-CoA synthase)                                                           |
| ncbi-gi:1560963 | mtu:Rv2501c | accA1  | Probable acetyl-/propionyl-coenzyme A carboxylase alpha chain (alpha subunit) AccA1: biotin carboxylase + biotin carboxyl carrier protein (BCCP)        |
| ncbi-gi:1560966 | mtu:Rv2524c | fas    | Probable fatty acid synthase Fas (fatty acid synthetase)                                                                                                |
| ncbi-gi:1560981 | mtu:Rv2679  | echA15 | Probable enoyl-CoA hydratase EchA15 (enoyl hydrase) (unsaturated acyl-CoA hydratase) (crotonase)                                                        |
| ncbi-gi:4488247 | mtu:Rv2790c | ltp1   | Probable lipid-transfer protein Ltp1                                                                                                                    |
| ncbi-gi:1561027 | mtu:Rv3140  | fadE23 | Probable acyl-CoA dehydrogenase FadE23                                                                                                                  |
| ncbi-gi:1561042 | mtu:Rv3285  | accA3  | Probable bifunctional protein acetyl-/propionyl-coenzyme A carboxylase (alpha chain) AccA3: biotin carboxylase + biotin carboxyl carrier protein (BCCP) |
| ncbi-gi:1561065 | mtu:Rv3516  | echA19 | Possible enoyl-CoA hydratase EchA19 (enoyl hydrase) (unsaturated acyl-CoA hydratase) (crotonase)                                                        |
| ncbi-gi:1561069 | mtu:Rv3556c | fadA6  | Probable acetyl-CoA acetyltransferase FadA6 (acetoacetyl-CoA thiolase)                                                                                  |
| ncbi-gi:1561091 | mtu:Rv3774  | echA21 | Possible enoyl-CoA hydratase EchA21 (enoyl hydrase) (unsaturated acyl-CoA hydratase) (crotonase)                                                        |

#### mtu00281 Geraniol degradation - Mycobacterium tuberculosis H37Rv (26)

|                             |        |                                                                                                  |
|-----------------------------|--------|--------------------------------------------------------------------------------------------------|
| ncbi-gi:1560736.mtu:Rv0222  | echA1  | Probable enoyl-CoA hydratase EchA1 (enoyl hydrase) (unsaturated acyl-CoA hydratase) (crotonase)  |
| ncbi-gi:1560736.mtu:Rv0223c |        | Probable aldehyde dehydrogenase                                                                  |
| ncbi-gi:1560738.mtu:Rv0244c | fadE5  | Probable acyl-CoA dehydrogenase FadE5                                                            |
| ncbi-gi:1560741.mtu:Rv0271c | fadE6  | Probable acyl-CoA dehydrogenase FadE6                                                            |
| ncbi-gi:1560777.mtu:Rv0632c | echA3  | Probable enoyl-CoA hydratase EchA3 (enoyl hydrase) (unsaturated acyl-CoA hydratase) (crotonase)  |
| ncbi-gi:5711676.mtu:Rv0675  | echA5  | Probable enoyl-CoA hydratase EchA5 (enoyl hydrase) (unsaturated acyl-CoA hydratase) (crotonase)  |
| ncbi-gi:1560789.mtu:Rv0752c | fadE9  | Probable acyl-CoA dehydrogenase FadE9                                                            |
| ncbi-gi:1560800.mtu:Rv0860  | fadB   | Probable fatty oxidation protein FadB                                                            |
| ncbi-gi:1560801.mtu:Rv0873  | fadE10 | Probable acyl-CoA dehydrogenase FadE10                                                           |
| ncbi-gi:1560804.mtu:Rv0905  | echA6  | Possible enoyl-CoA hydratase EchA6 (enoyl hydrase) (unsaturated acyl-CoA hydratase) (crotonase)  |
| ncbi-gi:1560811.mtu:Rv0971c | echA7  | Probable enoyl-CoA hydratase EchA7 (enoyl hydrase) (unsaturated acyl-CoA hydratase) (crotonase)  |
| ncbi-gi:1560811.mtu:Rv0972c | fadE12 | Acyl-CoA dehydrogenase FadE12                                                                    |
| ncbi-gi:1560821.mtu:Rv1070c | echA8  | Probable enoyl-CoA hydratase EchA8 (enoyl hydrase) (unsaturated acyl-CoA hydratase) (crotonase)  |
| ncbi-gi:1560821.mtu:Rv1071c | echA9  | Possible enoyl-CoA hydratase EchA9 (enoyl hydrase) (unsaturated acyl-CoA hydratase) (crotonase)  |
| ncbi-gi:1560848.mtu:Rv1346  | mbtN   | Acyl-CoA dehydrogenase MbtN                                                                      |
| ncbi-gi:1560860.mtu:Rv1467c | fadE15 | Probable acyl-CoA dehydrogenase FadE15                                                           |
| ncbi-gi:1560981.mtu:Rv2679  | echA15 | Probable enoyl-CoA hydratase EchA15 (enoyl hydrase) (unsaturated acyl-CoA hydratase) (crotonase) |
| ncbi-gi:1560992.mtu:Rv2789c | fadE21 | Probable acyl-CoA dehydrogenase FadE21                                                           |
| ncbi-gi:4488247.mtu:Rv2790c | ltp1   | Probable lipid-transfer protein Ltp1                                                             |
| ncbi-gi:1561027.mtu:Rv3139  | fadE24 | Probable acyl-CoA dehydrogenase FadE24                                                           |
| ncbi-gi:1561041.mtu:Rv3274c | fadE25 | Probable acyl-CoA dehydrogenase FadE25                                                           |
| ncbi-gi:1561064.mtu:Rv3504  | fadE26 | Probable acyl-CoA dehydrogenase FadE26                                                           |
| ncbi-gi:1561065.mtu:Rv3516  | echA19 | Possible enoyl-CoA hydratase EchA19 (enoyl hydrase) (unsaturated acyl-CoA hydratase) (crotonase) |
| ncbi-gi:1561069.mtu:Rv3563  | fadE32 | Probable acyl-CoA dehydrogenase FadE32                                                           |
| ncbi-gi:1561089.mtu:Rv3761c | fadE36 | Possible acyl-CoA dehydrogenase FadE36                                                           |
| ncbi-gi:1561091.mtu:Rv3774  | echA21 | Possible enoyl-CoA hydratase EchA21 (enoyl hydrase) (unsaturated acyl-CoA hydratase) (crotonase) |

#### mtu00071 Fatty acid degradation - Mycobacterium tuberculosis H37Rv (25)

|                             |        |                                                                                                  |
|-----------------------------|--------|--------------------------------------------------------------------------------------------------|
| ncbi-gi:1560727.mtu:Rv0131c | fadE1  | Probable acyl-CoA dehydrogenase FadE1                                                            |
| ncbi-gi:1560729.mtu:Rv0154c | fadE2  | Probable acyl-CoA dehydrogenase FadE2                                                            |
| ncbi-gi:1560736.mtu:Rv0222  | echA1  | Probable enoyl-CoA hydratase EchA1 (enoyl hydrase) (unsaturated acyl-CoA hydratase) (crotonase)  |
| ncbi-gi:1560737.mtu:Rv0231  | fadE4  | Probable acyl-CoA dehydrogenase FadE4                                                            |
| ncbi-gi:1560738.mtu:Rv0243  | fadA2  | Probable acetyl-CoA acyltransferase FadA2 (3-ketoacyl-CoA thiolase) (beta-ketothiolase)          |
| ncbi-gi:1560754.mtu:Rv0400c | fadE7  | Acyl-CoA dehydrogenase FadE7                                                                     |
| ncbi-gi:1560777.mtu:Rv0632c | echA3  | Probable enoyl-CoA hydratase EchA3 (enoyl hydrase) (unsaturated acyl-CoA hydratase) (crotonase)  |
| ncbi-gi:5711676.mtu:Rv0675  | echA5  | Probable enoyl-CoA hydratase EchA5 (enoyl hydrase) (unsaturated acyl-CoA hydratase) (crotonase)  |
| ncbi-gi:5711677.mtu:Rv0761c | adhB   | Possible zinc-containing alcohol dehydrogenase NAD dependent AdhB                                |
| ncbi-gi:1560799.mtu:Rv0859  | fadA   | Possible acyl-CoA thiolase FadA                                                                  |
| ncbi-gi:1560800.mtu:Rv0860  | fadB   | Probable fatty oxidation protein FadB                                                            |
| ncbi-gi:1560804.mtu:Rv0905  | echA6  | Possible enoyl-CoA hydratase EchA6 (enoyl hydrase) (unsaturated acyl-CoA hydratase) (crotonase)  |
| ncbi-gi:1560811.mtu:Rv0971c | echA7  | Probable enoyl-CoA hydratase EchA7 (enoyl hydrase) (unsaturated acyl-CoA hydratase) (crotonase)  |
| ncbi-gi:1560821.mtu:Rv1070c | echA8  | Probable enoyl-CoA hydratase EchA8 (enoyl hydrase) (unsaturated acyl-CoA hydratase) (crotonase)  |
| ncbi-gi:1560821.mtu:Rv1071c | echA9  | Possible enoyl-CoA hydratase EchA9 (enoyl hydrase) (unsaturated acyl-CoA hydratase) (crotonase)  |
| ncbi-gi:1560821.mtu:Rv1074c | fadA3  | Probable beta-ketoacyl CoA thiolase FadA3                                                        |
| ncbi-gi:1560846.mtu:Rv1323  | fadA4  | Probable acetyl-CoA acetyltransferase FadA4 (acetoacetyl-CoA thiolase)                           |
| ncbi-gi:1560932.mtu:Rv2187  | fadD15 | Long-chain-fatty-acid-CoA ligase FadD15 (fatty-acid-CoA synthetase) (fatty-acid-CoA synthase)    |
| ncbi-gi:1560981.mtu:Rv2679  | echA15 | Probable enoyl-CoA hydratase EchA15 (enoyl hydrase) (unsaturated acyl-CoA hydratase) (crotonase) |
| ncbi-gi:4488247.mtu:Rv2790c | ltp1   | Probable lipid-transfer protein Ltp1                                                             |
| ncbi-gi:1561022.mtu:Rv3086  | adhD   | Probable zinc-type alcohol dehydrogenase AdhD (aldehyde reductase)                               |
| ncbi-gi:1561027.mtu:Rv3140  | fadE23 | Probable acyl-CoA dehydrogenase FadE23                                                           |
| ncbi-gi:1561065.mtu:Rv3516  | echA19 | Possible enoyl-CoA hydratase EchA19 (enoyl hydrase) (unsaturated acyl-CoA hydratase) (crotonase) |
| ncbi-gi:1561069.mtu:Rv3556c | fadA6  | Probable acetyl-CoA acetyltransferase FadA6 (acetoacetyl-CoA thiolase)                           |
| ncbi-gi:1561091.mtu:Rv3774  | echA21 | Possible enoyl-CoA hydratase EchA21 (enoyl hydrase) (unsaturated acyl-CoA hydratase) (crotonase) |

#### mtu00020 Citrate cycle (TCA cycle) - Mycobacterium tuberculosis H37Rv (23)

|                             |       |                                                                                                                                                           |
|-----------------------------|-------|-----------------------------------------------------------------------------------------------------------------------------------------------------------|
| ncbi-gi:1560720.mtu:Rv0066c | icd2  | Probable isocitrate dehydrogenase [NADP] Icd2 (oxalosuccinate decarboxylase) (IDH) (NADP+-specific ICDH) (IDP)                                            |
| ncbi-gi:1560735.mtu:Rv0211  | pckA  | Probable iron-regulated phosphoenolpyruvate carboxykinase [GTP] PckA (phosphoenolpyruvate carboxylase) (PEPCK)(pep carboxykinase)                         |
| ncbi-gi:1560738.mtu:Rv0247c |       | Probable succinate dehydrogenase [iron-sulfur subunit] (succinic dehydrogenase)                                                                           |
| ncbi-gi:1560738.mtu:Rv0248c |       | Probable succinate dehydrogenase [iron-sulfur subunit] (succinic dehydrogenase)                                                                           |
| ncbi-gi:1560760.mtu:Rv0462  | lpdC  | Dihydrolipoamide dehydrogenase LpdC (lipoamide reductase (NADH)) (lipoyl dehydrogenase) (dihydrolipoyl dehydrogenase) (diaphorase)                        |
| ncbi-gi:5711678.mtu:Rv0794c | lpdB  | Probable oxidoreductase                                                                                                                                   |
| ncbi-gi:1560802.mtu:Rv0889c | citA  | Probable citrate synthase II CitA                                                                                                                         |
| ncbi-gi:1560803.mtu:Rv0896  | gltA2 | Probable citrate synthase I GltA2                                                                                                                         |
| ncbi-gi:1560809.mtu:Rv0951  | sucC  | Probable succinyl-CoA synthetase (beta chain) SucC (SCS-beta)                                                                                             |
| ncbi-gi:1560809.mtu:Rv0952  | sucD  | Probable succinyl-CoA synthetase (alpha chain) SucD (SCS-alpha)                                                                                           |
| ncbi-gi:1560823.mtu:Rv1098c | fum   | Probable fumarase Fum (fumarate hydratase)                                                                                                                |
| ncbi-gi:1560838.mtu:Rv1240  | mdh   | Probable malate dehydrogenase Mdh                                                                                                                         |
| ncbi-gi:1560861.mtu:Rv1475c | acn   | Probable iron-regulated aconitate hydratase Acn (citrate hydro-lyase) (aconitase)                                                                         |
| ncbi-gi:1560935.mtu:Rv2215  | dlaT  | DlaT, dihydrolipoamide acyltransferase, E2 component of pyruvate dehydrogenase                                                                            |
| ncbi-gi:4488247.mtu:Rv2241  | aceE  | Pyruvate dehydrogenase E1 component AceE (pyruvate decarboxylase) (pyruvate dehydrogenase) (pyruvic dehydrogenase)                                        |
| ncbi-gi:1560959.mtu:Rv2454c |       | Probable oxidoreductase (beta subunit)                                                                                                                    |
| ncbi-gi:1560959.mtu:Rv2455c |       | Probable oxidoreductase (alpha subunit)                                                                                                                   |
| ncbi-gi:1560963.mtu:Rv2495c | bkdC  | Probable branched-chain keto acid dehydrogenase E2 component BkdC                                                                                         |
| ncbi-gi:1560963.mtu:Rv2498c | citE  | Probable citrate (pro-3S)-lyase (beta subunit) CitE (citrase) (citritase) (citridesmolase) (citrase aldolase)                                             |
| ncbi-gi:1561010.mtu:Rv2967c | pca   | Probable pyruvate carboxylase Pca (pyruvic carboxylase)                                                                                                   |
| ncbi-gi:1561021.mtu:Rv3075c |       | hypothetical protein                                                                                                                                      |
| ncbi-gi:1561045.mtu:Rv3318  | sdhA  | Probable succinate dehydrogenase (flavoprotein subunit) SdhA (succinic dehydrogenase) (fumarate reductase) (fumarate dehydrogenase) (fumaric hydrogenase) |
| ncbi-gi:1561047.mtu:Rv3339c | icd1  | Probable isocitrate dehydrogenase [NADP] Icd1 (oxalosuccinate decarboxylase) (IDH) (NADP+-specific ICDH) (IDP)                                            |

#### mtu00230 Purine metabolism - Mycobacterium tuberculosis H37Rv (22)

|                             |       |                                                                                                                                                                                                                                                                                                              |
|-----------------------------|-------|--------------------------------------------------------------------------------------------------------------------------------------------------------------------------------------------------------------------------------------------------------------------------------------------------------------|
| ncbi-gi:1560714:mtu:Rv0002  | dnaN  | DNA polymerase III (beta chain) DnaN (DNA nucleotidyltransferase)                                                                                                                                                                                                                                            |
| ncbi-gi:1560749:mtu:Rv0357c | purA  | Probable adenylsuccinate synthetase PurA (imp--aspartate ligase) (ADSS) (ampsase)                                                                                                                                                                                                                            |
| ncbi-gi:1560753:mtu:Rv0389  | purT  | Probable phosphoribosylglycinamide formyltransferase 2 PurT (GART 2) (gar transformylase 2) (5'-phosphoribosylglycinamide transformylase 2) (formate-dependent gar transformylase)                                                                                                                           |
| ncbi-gi:1560780:mtu:Rv0667  | rpoB  | DNA-directed RNA polymerase (beta chain) RpoB (transcriptase beta chain) (RNA polymerase beta subunit)                                                                                                                                                                                                       |
| ncbi-gi:1560780:mtu:Rv0668  | rpoC  | DNA-directed RNA polymerase (beta' chain) RpoC (transcriptase beta' chain) (RNA polymerase beta' subunit)                                                                                                                                                                                                    |
| ncbi-gi:1560787:mtu:Rv0733  | adk   | Adenylate kinase Adk (ATP-AMP transphosphorylase)                                                                                                                                                                                                                                                            |
| ncbi-gi:1560791:mtu:Rv0772  | purD  | Probable phosphoribosylamine--glycine ligase PurD (GARS) (glycinamide ribonucleotide synthetase) (phosphoribosylglycinamide synthetase) (5'-phosphoribosylglycinamide synthetase)                                                                                                                            |
| ncbi-gi:1560794:mtu:Rv0809  | purM  | Probable phosphoribosylformylglycinimidine CYCLO-ligase PurM (AIRS) (phosphoribosyl-aminoimidazole synthetase) (air synthase)                                                                                                                                                                                |
| ncbi-gi:1560809:mtu:Rv0957  | purH  | Probable bifunctional purine biosynthesis protein PurH: phosphoribosylaminoimidazolecarboxamide formyltransferase (AICAR transformylase) (5'-phosphoribosyl-5-aminoimidazole-4-carboxamide formyltransferase) + inosinemonophosphate cyclohydrolase (imp cyclohydrolase) (inosinase) (imp synthetase) (ATIC) |
| ncbi-gi:1560815:mtu:Rv1017c | prsA  | Probable ribose-phosphate pyrophosphokinase PrsA (phosphoribosyl pyrophosphate synthetase) (PRPP synthetase)                                                                                                                                                                                                 |
| ncbi-gi:1560875:mtu:Rv1617  | pykA  | Probable pyruvate kinase PykA                                                                                                                                                                                                                                                                                |
| ncbi-gi:1560876:mtu:Rv1629  | polA  | Probable DNA polymerase I PolA                                                                                                                                                                                                                                                                               |
| ncbi-gi:1560898:mtu:Rv1843c | guaB1 | Probable inosine-5'-monophosphate dehydrogenase GuaB1(imp dehydrogenase) (IMPDH) (IMPD)                                                                                                                                                                                                                      |
| ncbi-gi:1560933:mtu:Rv2202c | adoK  | Adenosine kinase                                                                                                                                                                                                                                                                                             |
| ncbi-gi:1560992:mtu:Rv2783c | gpsI  | Bifunctional protein polyribonucleotide nucleotidyltransferase GpsI: guanosine pentaphosphate synthetase + polyribonucleotide nucleotidyltransferase (polynucleotide phosphorylase) (pnpase)                                                                                                                 |
| ncbi-gi:5711705:mtu:Rv3048c | nrdF2 | Ribonucleoside-diphosphate reductase (beta chain) NrdF2 (ribonucleotide reductase small subunit) (R2F protein)                                                                                                                                                                                               |
| ncbi-gi:1561018:mtu:Rv3051c | nrdE  | Ribonucleoside-diphosphate reductase (alpha chain) NrdE (ribonucleotide reductase small subunit) (R1F protein)                                                                                                                                                                                               |
| ncbi-gi:1561041:mtu:Rv3275c | purE  | Probable phosphoribosylaminoimidazole carboxylase catalytic subunit PurE (air carboxylase) (AIRC)                                                                                                                                                                                                            |
| ncbi-gi:1561041:mtu:Rv3276c | purK  | Probable phosphoribosylaminoimidazole carboxylase ATPase subunit PurK (air carboxylase) (AIRC)                                                                                                                                                                                                               |
| ncbi-gi:1561053:mtu:Rv3396c | guaA  | Probable GMP synthase [glutamine-hydrolyzing] GuaA (glutamine amidotransferase) (GMP synthetase)                                                                                                                                                                                                             |
| ncbi-gi:1561054:mtu:Rv3410c | guaB3 | Probable inosine-5'-monophosphate dehydrogenase GuaB3 (imp dehydrogenase) (inosinic acid dehydrogenase) (inosinate dehydrogenase) (imp oxidoreductase) (inosine-5'-monophosphate oxidoreductase) (IMPDH) (IMPD)                                                                                              |
| ncbi-gi:1561059:mtu:Rv3457c | rpoA  | Probable DNA-directed RNA polymerase (alpha chain) RpoA (transcriptase alpha chain) (RNA polymerase alpha subunit) (DNA-directed RNA nucleotidyltransferase)                                                                                                                                                 |

#### mtu00310 Lysine degradation - Mycobacterium tuberculosis H37Rv (20)

|                             |        |                                                                                                  |
|-----------------------------|--------|--------------------------------------------------------------------------------------------------|
| ncbi-gi:1560736:mtu:Rv0222  | echA1  | Probable enoyl-CoA hydratase EchA1 (enoyl hydrase) (unsaturated acyl-CoA hydratase) (crotonase)  |
| ncbi-gi:5711670:mtu:Rv0234c | gabD1  | Succinate-semialdehyde dehydrogenase [NADP+] dependent (SSDH) GabD1                              |
| ncbi-gi:1560738:mtu:Rv0243  | fadA2  | Probable acetyl-CoA acyltransferase FadA2 (3-ketoacyl-CoA thiolase) (beta-ketothiolase)          |
| ncbi-gi:1560754:mtu:Rv0400c | fadE7  | Acyl-CoA dehydrogenase FadE7                                                                     |
| ncbi-gi:1560777:mtu:Rv0632c | echA3  | Probable enoyl-CoA hydratase EchA3 (enoyl hydrase) (unsaturated acyl-CoA hydratase) (crotonase)  |
| ncbi-gi:5711676:mtu:Rv0675  | echA5  | Probable enoyl-CoA hydratase EchA5 (enoyl hydrase) (unsaturated acyl-CoA hydratase) (crotonase)  |
| ncbi-gi:1560799:mtu:Rv0859  | fadA   | Possible acyl-CoA thiolase FadA                                                                  |
| ncbi-gi:1560800:mtu:Rv0860  | fadB   | Probable fatty oxidation protein FadB                                                            |
| ncbi-gi:1560804:mtu:Rv0905  | echA6  | Possible enoyl-CoA hydratase EchA6 (enoyl hydrase) (unsaturated acyl-CoA hydratase) (crotonase)  |
| ncbi-gi:1560811:mtu:Rv0971c | echA7  | Probable enoyl-CoA hydratase EchA7 (enoyl hydrase) (unsaturated acyl-CoA hydratase) (crotonase)  |
| ncbi-gi:1560821:mtu:Rv1070c | echA8  | Probable enoyl-CoA hydratase EchA8 (enoyl hydrase) (unsaturated acyl-CoA hydratase) (crotonase)  |
| ncbi-gi:1560821:mtu:Rv1071c | echA9  | Possible enoyl-CoA hydratase EchA9 (enoyl hydrase) (unsaturated acyl-CoA hydratase) (crotonase)  |
| ncbi-gi:1560821:mtu:Rv1074c | fadA3  | Probable beta-ketoacyl CoA thiolase FadA3                                                        |
| ncbi-gi:1560846:mtu:Rv1323  | fadA4  | Probable acetyl-CoA acetyltransferase FadA4 (acetoacetyl-CoA thiolase)                           |
| ncbi-gi:5711690:mtu:Rv1731  | gabD2  | Possible succinate-semialdehyde dehydrogenase [NADP+] dependent (SSDH) GabD2                     |
| ncbi-gi:1560935:mtu:Rv2215  | dlaT   | DlaT, dihydrolipoamide acyltransferase, E2 component of pyruvate dehydrogenase                   |
| ncbi-gi:1560981:mtu:Rv2679  | echA15 | Probable enoyl-CoA hydratase EchA15 (enoyl hydrase) (unsaturated acyl-CoA hydratase) (crotonase) |
| ncbi-gi:1561065:mtu:Rv3516  | echA19 | Possible enoyl-CoA hydratase EchA19 (enoyl hydrase) (unsaturated acyl-CoA hydratase) (crotonase) |
| ncbi-gi:1561069:mtu:Rv3556c | fadA6  | Probable acetyl-CoA acetyltransferase FadA6 (acetoacetyl-CoA thiolase)                           |
| ncbi-gi:1561091:mtu:Rv3774  | echA21 | Possible enoyl-CoA hydratase EchA21 (enoyl hydrase) (unsaturated acyl-CoA hydratase) (crotonase) |

#### mtu00620 Pyruvate metabolism - Mycobacterium tuberculosis H37Rv (20)

|                             |       |                                                                                                                                                                                                                                         |
|-----------------------------|-------|-----------------------------------------------------------------------------------------------------------------------------------------------------------------------------------------------------------------------------------------|
| ncbi-gi:1560735:mtu:Rv0211  | pckA  | Probable iron-regulated phosphoenolpyruvate carboxykinase [GTP] PckA (phosphoenolpyruvate carboxylase) (PEPCK)(pep carboxykinase)                                                                                                       |
| ncbi-gi:1560738:mtu:Rv0243  | fadA2 | Probable acetyl-CoA acyltransferase FadA2 (3-ketoacyl-CoA thiolase) (beta-ketothiolase)                                                                                                                                                 |
| ncbi-gi:1560754:mtu:Rv0408  | pta   | Probable phosphate acetyltransferase Pta (phosphotransacetylase)                                                                                                                                                                        |
| ncbi-gi:1560760:mtu:Rv0462  | lpdC  | Dihydrolipoamide dehydrogenase LpdC (lipoamide reductase (NADH)) (lipoyl dehydrogenase) (dihydrolipoyl dehydrogenase) (diaphorase)                                                                                                      |
| ncbi-gi:5711678:mtu:Rv0794c | lpdB  | Probable oxidoreductase                                                                                                                                                                                                                 |
| ncbi-gi:1560799:mtu:Rv0859  | fadA  | Possible acyl-CoA thiolase FadA                                                                                                                                                                                                         |
| ncbi-gi:1560821:mtu:Rv1074c | fadA3 | Probable beta-ketoacyl CoA thiolase FadA3                                                                                                                                                                                               |
| ncbi-gi:1560838:mtu:Rv1240  | mdh   | Probable malate dehydrogenase Mdh                                                                                                                                                                                                       |
| ncbi-gi:1560846:mtu:Rv1323  | fadA4 | Probable acetyl-CoA acetyltransferase FadA4 (acetoacetyl-CoA thiolase)                                                                                                                                                                  |
| ncbi-gi:1560875:mtu:Rv1617  | pykA  | Probable pyruvate kinase PykA                                                                                                                                                                                                           |
| ncbi-gi:1560897:mtu:Rv1837c | glcB  | Malate synthase G GlcB                                                                                                                                                                                                                  |
| ncbi-gi:1560900:mtu:Rv1872c | lldD2 | Possible L-lactate dehydrogenase (cytochrome) LldD2                                                                                                                                                                                     |
| ncbi-gi:4488247:mtu:Rv2241  | aceE  | Pyruvate dehydrogenase E1 component AceE (pyruvate decarboxylase) (pyruvate dehydrogenase) (pyruvic dehydrogenase)                                                                                                                      |
| ncbi-gi:1560963:mtu:Rv2495c | bkdC  | Probable branched-chain keto acid dehydrogenase E2 component BkdC                                                                                                                                                                       |
| ncbi-gi:5711703:mtu:Rv2922A | acyP  | Probable acylphosphatase AcyP (acylphosphate phosphohydrolase)                                                                                                                                                                          |
| ncbi-gi:1561010:mtu:Rv2967c | pca   | Probable pyruvate carboxylase Pca (pyruvic carboxylase)                                                                                                                                                                                 |
| ncbi-gi:1561067:mtu:Rv3535c | hsaG  | Probable acetaldehyde dehydrogenase (acetaldehyde dehydrogenase [acetylating])                                                                                                                                                          |
| ncbi-gi:1561069:mtu:Rv3556c | fadA6 | Probable acetyl-CoA acetyltransferase FadA6 (acetoacetyl-CoA thiolase)                                                                                                                                                                  |
| ncbi-gi:1561080:mtu:Rv3667  | acs   | Acetyl-coenzyme A synthetase Acs (acetate--CoA ligase) (acetyl-CoA synthetase) (acetyl-CoA synthase) (acyl-activating enzyme) (acetate thiokinase) (acetyl-activating enzyme) (acetate--coenzyme A ligase) (acetyl-coenzyme A synthase) |
| ncbi-gi:3454620:mtu:Rv3710  | leuA  | 2-isopropylmalate synthase LeuA (alpha-isopropylmalate synthase) (alpha-IPM synthetase) (IPMS)                                                                                                                                          |

#### mtu00010 Glycolysis / Gluconeogenesis - Mycobacterium tuberculosis H37Rv (20)

|                             |      |                                                                                                                                    |
|-----------------------------|------|------------------------------------------------------------------------------------------------------------------------------------|
| ncbi-gi:1560735:mtu:Rv0211  | pckA | Probable iron-regulated phosphoenolpyruvate carboxykinase [GTP] PckA (phosphoenolpyruvate carboxylase) (PEPCK)(pep carboxykinase)  |
| ncbi-gi:1560750:mtu:Rv0363c | fba  | Probable fructose-bisphosphate aldolase Fba                                                                                        |
| ncbi-gi:1560760:mtu:Rv0462  | lpdC | Dihydrolipoamide dehydrogenase LpdC (lipoamide reductase (NADH)) (lipoyl dehydrogenase) (dihydrolipoyl dehydrogenase) (diaphorase) |
| ncbi-gi:5711673:mtu:Rv0489  | gpm1 | Probable phosphoglycerate mutase 1 Gpm1 (phosphoglyceromutase) (PGAM) (BPG-dependent PGAM)                                         |
| ncbi-gi:5711677:mtu:Rv0761c | adhB | Possible zinc-containing alcohol dehydrogenase NAD dependent AdhB                                                                  |
| ncbi-gi:5711678:mtu:Rv0794c | lpdB | Probable oxidoreductase                                                                                                            |
| ncbi-gi:1560808:mtu:Rv0946c | pgi  | Probable glucose-6-phosphate isomerase Pgi (GPI) (phosphoglucose isomerase) (phosphohexose isomerase) (phi)                        |
| ncbi-gi:1560816:mtu:Rv1023  | eno  | Probable enolase Eno                                                                                                               |
| ncbi-gi:4488247:mtu:Rv1099c | glpX | Fructose 1,6-bisphosphatase GlpX                                                                                                   |
| ncbi-gi:1560857:mtu:Rv1436  | gap  | Probable glyceraldehyde 3-phosphate dehydrogenase Gap (GAPDH)                                                                      |
| ncbi-gi:1560857:mtu:Rv1437  | pgk  | Probable phosphoglycerate kinase Pkg                                                                                               |

|                  |             |      |                                                                                                                                                                                                                                         |
|------------------|-------------|------|-----------------------------------------------------------------------------------------------------------------------------------------------------------------------------------------------------------------------------------------|
| ncbi-gi:15608574 | mtu:Rv1438  | tpi  | Probable triosephosphate isomerase Tpi (TIM)                                                                                                                                                                                            |
| ncbi-gi:1560875  | mtu:Rv1617  | pykA | Probable pyruvate kinase PykA                                                                                                                                                                                                           |
| ncbi-gi:1560916  | mtu:Rv2029c | pfkB | 6-phosphofructokinase PfkB (phosphohexokinase) (phosphofructokinase)                                                                                                                                                                    |
| ncbi-gi:4488247  | mtu:Rv2241  | aceE | Pyruvate dehydrogenase E1 component AceE (pyruvate decarboxylase) (pyruvate dehydrogenase) (pyruvic dehydrogenase)                                                                                                                      |
| ncbi-gi:1560955  | mtu:Rv2419c | gpgP | Glucosyl-3-phosphoglycerate phosphatase GpgP                                                                                                                                                                                            |
| ncbi-gi:1560963  | mtu:Rv2495c | bkdC | Probable branched-chain keto acid dehydrogenase E2 component BkdC                                                                                                                                                                       |
| ncbi-gi:1561014  | mtu:Rv3010c | pfkA | Probable 6-phosphofructokinase PfkA (phosphohexokinase) (phosphofructokinase)                                                                                                                                                           |
| ncbi-gi:1561022  | mtu:Rv3086  | adhD | Probable zinc-type alcohol dehydrogenase AdhD (aldehyde reductase)                                                                                                                                                                      |
| ncbi-gi:1561080  | mtu:Rv3667  | acs  | Acetyl-coenzyme A synthetase Acs (acetate--CoA ligase) (acetyl-CoA synthetase) (acetyl-CoA synthase) (acyl-activating enzyme) (acetate thiokinase) (acetyl-activating enzyme) (acetate--coenzyme A ligase) (acetyl-coenzyme A synthase) |

#### mtu00380 Tryptophan metabolism - Mycobacterium tuberculosis H37Rv (18)

|                 |             |        |                                                                                                  |
|-----------------|-------------|--------|--------------------------------------------------------------------------------------------------|
| ncbi-gi:1560736 | mtu:Rv0222  | echA1  | Probable enoyl-CoA hydratase EchA1 (enoyl hydrase) (unsaturated acyl-CoA hydratase) (crotonase)  |
| ncbi-gi:1560738 | mtu:Rv0243  | fadA2  | Probable acetyl-CoA acyltransferase FadA2 (3-ketoacyl-CoA thiolase) (beta-ketothiolase)          |
| ncbi-gi:1560754 | mtu:Rv0400c | fadE7  | Acyl-CoA dehydrogenase FadE7                                                                     |
| ncbi-gi:1560777 | mtu:Rv0632c | echA3  | Probable enoyl-CoA hydratase EchA3 (enoyl hydrase) (unsaturated acyl-CoA hydratase) (crotonase)  |
| ncbi-gi:5711676 | mtu:Rv0675  | echA5  | Probable enoyl-CoA hydratase EchA5 (enoyl hydrase) (unsaturated acyl-CoA hydratase) (crotonase)  |
| ncbi-gi:1560799 | mtu:Rv0859  | fadA   | Possible acyl-CoA thiolase FadA                                                                  |
| ncbi-gi:1560800 | mtu:Rv0860  | fadB   | Probable fatty oxidation protein FadB                                                            |
| ncbi-gi:1560804 | mtu:Rv0905  | echA6  | Possible enoyl-CoA hydratase EchA6 (enoyl hydrase) (unsaturated acyl-CoA hydratase) (crotonase)  |
| ncbi-gi:1560811 | mtu:Rv0971c | echA7  | Probable enoyl-CoA hydratase EchA7 (enoyl hydrase) (unsaturated acyl-CoA hydratase) (crotonase)  |
| ncbi-gi:1560821 | mtu:Rv1070c | echA8  | Probable enoyl-CoA hydratase EchA8 (enoyl hydrase) (unsaturated acyl-CoA hydratase) (crotonase)  |
| ncbi-gi:1560821 | mtu:Rv1071c | echA9  | Possible enoyl-CoA hydratase EchA9 (enoyl hydrase) (unsaturated acyl-CoA hydratase) (crotonase)  |
| ncbi-gi:1560821 | mtu:Rv1074c | fadA3  | Probable beta-ketoacyl CoA thiolase FadA3                                                        |
| ncbi-gi:1560846 | mtu:Rv1323  | fadA4  | Probable acetyl-CoA acetyltransferase FadA4 (acetoacetyl-CoA thiolase)                           |
| ncbi-gi:1560904 | mtu:Rv1908c | katG   | Catalase-peroxidase-peroxynitritase T KatG                                                       |
| ncbi-gi:1560981 | mtu:Rv2679  | echA15 | Probable enoyl-CoA hydratase EchA15 (enoyl hydrase) (unsaturated acyl-CoA hydratase) (crotonase) |
| ncbi-gi:1561065 | mtu:Rv3516  | echA19 | Possible enoyl-CoA hydratase EchA19 (enoyl hydrase) (unsaturated acyl-CoA hydratase) (crotonase) |
| ncbi-gi:1561069 | mtu:Rv3556c | fadA6  | Probable acetyl-CoA acetyltransferase FadA6 (acetoacetyl-CoA thiolase)                           |
| ncbi-gi:1561091 | mtu:Rv3774  | echA21 | Possible enoyl-CoA hydratase EchA21 (enoyl hydrase) (unsaturated acyl-CoA hydratase) (crotonase) |

#### mtu00362 Benzoate degradation - Mycobacterium tuberculosis H37Rv (18)

|                 |             |        |                                                                                                  |
|-----------------|-------------|--------|--------------------------------------------------------------------------------------------------|
| ncbi-gi:1560736 | mtu:Rv0222  | echA1  | Probable enoyl-CoA hydratase EchA1 (enoyl hydrase) (unsaturated acyl-CoA hydratase) (crotonase)  |
| ncbi-gi:1560738 | mtu:Rv0243  | fadA2  | Probable acetyl-CoA acyltransferase FadA2 (3-ketoacyl-CoA thiolase) (beta-ketothiolase)          |
| ncbi-gi:1560760 | mtu:Rv0468  | fadB2  | 3-hydroxybutyryl-CoA dehydrogenase FadB2 (beta-hydroxybutyryl-CoA dehydrogenase) (BHBD)          |
| ncbi-gi:1560777 | mtu:Rv0632c | echA3  | Probable enoyl-CoA hydratase EchA3 (enoyl hydrase) (unsaturated acyl-CoA hydratase) (crotonase)  |
| ncbi-gi:5711676 | mtu:Rv0675  | echA5  | Probable enoyl-CoA hydratase EchA5 (enoyl hydrase) (unsaturated acyl-CoA hydratase) (crotonase)  |
| ncbi-gi:1560799 | mtu:Rv0859  | fadA   | Possible acyl-CoA thiolase FadA                                                                  |
| ncbi-gi:1560804 | mtu:Rv0905  | echA6  | Possible enoyl-CoA hydratase EchA6 (enoyl hydrase) (unsaturated acyl-CoA hydratase) (crotonase)  |
| ncbi-gi:1560811 | mtu:Rv0971c | echA7  | Probable enoyl-CoA hydratase EchA7 (enoyl hydrase) (unsaturated acyl-CoA hydratase) (crotonase)  |
| ncbi-gi:1560821 | mtu:Rv1070c | echA8  | Probable enoyl-CoA hydratase EchA8 (enoyl hydrase) (unsaturated acyl-CoA hydratase) (crotonase)  |
| ncbi-gi:1560821 | mtu:Rv1071c | echA9  | Possible enoyl-CoA hydratase EchA9 (enoyl hydrase) (unsaturated acyl-CoA hydratase) (crotonase)  |
| ncbi-gi:1560821 | mtu:Rv1074c | fadA3  | Probable beta-ketoacyl CoA thiolase FadA3                                                        |
| ncbi-gi:1560846 | mtu:Rv1323  | fadA4  | Probable acetyl-CoA acetyltransferase FadA4 (acetoacetyl-CoA thiolase)                           |
| ncbi-gi:1560981 | mtu:Rv2679  | echA15 | Probable enoyl-CoA hydratase EchA15 (enoyl hydrase) (unsaturated acyl-CoA hydratase) (crotonase) |
| ncbi-gi:4488247 | mtu:Rv2790c | ltp1   | Probable lipid-transfer protein Ltp1                                                             |
| ncbi-gi:1561065 | mtu:Rv3516  | echA19 | Possible enoyl-CoA hydratase EchA19 (enoyl hydrase) (unsaturated acyl-CoA hydratase) (crotonase) |
| ncbi-gi:1561067 | mtu:Rv3535c | hsaG   | Probable acetaldehyde dehydrogenase (acetaldehyde dehydrogenase [acetylating])                   |
| ncbi-gi:1561069 | mtu:Rv3556c | fadA6  | Probable acetyl-CoA acetyltransferase FadA6 (acetoacetyl-CoA thiolase)                           |
| ncbi-gi:1561091 | mtu:Rv3774  | echA21 | Possible enoyl-CoA hydratase EchA21 (enoyl hydrase) (unsaturated acyl-CoA hydratase) (crotonase) |

#### mtu00410 beta-Alanine metabolism - Mycobacterium tuberculosis H37Rv (18)

|                 |             |        |                                                                                                                                                                                  |
|-----------------|-------------|--------|----------------------------------------------------------------------------------------------------------------------------------------------------------------------------------|
| ncbi-gi:1560727 | mtu:Rv0131c | fadE1  | Probable acyl-CoA dehydrogenase FadE1                                                                                                                                            |
| ncbi-gi:1560729 | mtu:Rv0154c | fadE2  | Probable acyl-CoA dehydrogenase FadE2                                                                                                                                            |
| ncbi-gi:1560736 | mtu:Rv0222  | echA1  | Probable enoyl-CoA hydratase EchA1 (enoyl hydrase) (unsaturated acyl-CoA hydratase) (crotonase)                                                                                  |
| ncbi-gi:1560737 | mtu:Rv0231  | fadE4  | Probable acyl-CoA dehydrogenase FadE4                                                                                                                                            |
| ncbi-gi:1560777 | mtu:Rv0632c | echA3  | Probable enoyl-CoA hydratase EchA3 (enoyl hydrase) (unsaturated acyl-CoA hydratase) (crotonase)                                                                                  |
| ncbi-gi:5711676 | mtu:Rv0675  | echA5  | Probable enoyl-CoA hydratase EchA5 (enoyl hydrase) (unsaturated acyl-CoA hydratase) (crotonase)                                                                                  |
| ncbi-gi:1560789 | mtu:Rv0753c | mmsA   | Probable methylmalonate-semialdehyde dehydrogenase MmsA (methylmalonic acid semialdehyde dehydrogenase) (MMSDH)                                                                  |
| ncbi-gi:1560800 | mtu:Rv0860  | fadB   | Probable fatty oxidation protein FadB                                                                                                                                            |
| ncbi-gi:1560804 | mtu:Rv0905  | echA6  | Possible enoyl-CoA hydratase EchA6 (enoyl hydrase) (unsaturated acyl-CoA hydratase) (crotonase)                                                                                  |
| ncbi-gi:1560811 | mtu:Rv0971c | echA7  | Probable enoyl-CoA hydratase EchA7 (enoyl hydrase) (unsaturated acyl-CoA hydratase) (crotonase)                                                                                  |
| ncbi-gi:1560821 | mtu:Rv1070c | echA8  | Probable enoyl-CoA hydratase EchA8 (enoyl hydrase) (unsaturated acyl-CoA hydratase) (crotonase)                                                                                  |
| ncbi-gi:1560821 | mtu:Rv1071c | echA9  | Possible enoyl-CoA hydratase EchA9 (enoyl hydrase) (unsaturated acyl-CoA hydratase) (crotonase)                                                                                  |
| ncbi-gi:1560972 | mtu:Rv2589  | gabT   | 4-aminobutyrate aminotransferase GabT (gamma-amino-N-butyrate transaminase) (GABA transaminase) (glutamate:succinic semialdehyde transaminase) (GABA aminotransferase) (GABA-at) |
| ncbi-gi:1560981 | mtu:Rv2679  | echA15 | Probable enoyl-CoA hydratase EchA15 (enoyl hydrase) (unsaturated acyl-CoA hydratase) (crotonase)                                                                                 |
| ncbi-gi:1561027 | mtu:Rv3140  | fadE23 | Probable acyl-CoA dehydrogenase FadE23                                                                                                                                           |
| ncbi-gi:1561056 | mtu:Rv3432c | gadB   | Probable glutamate decarboxylase GadB                                                                                                                                            |
| ncbi-gi:1561065 | mtu:Rv3516  | echA19 | Possible enoyl-CoA hydratase EchA19 (enoyl hydrase) (unsaturated acyl-CoA hydratase) (crotonase)                                                                                 |
| ncbi-gi:1561091 | mtu:Rv3774  | echA21 | Possible enoyl-CoA hydratase EchA21 (enoyl hydrase) (unsaturated acyl-CoA hydratase) (crotonase)                                                                                 |

#### mtu00630 Glyoxylate and dicarboxylate metabolism - Mycobacterium tuberculosis H37Rv (17)

|                 |             |       |                                                                                         |
|-----------------|-------------|-------|-----------------------------------------------------------------------------------------|
| ncbi-gi:1560738 | mtu:Rv0243  | fadA2 | Probable acetyl-CoA acyltransferase FadA2 (3-ketoacyl-CoA thiolase) (beta-ketothiolase) |
| ncbi-gi:5711673 | mtu:Rv0467  | icl1  | Isocitrate lyase Icl (isocitrase) (isocitratase)                                        |
| ncbi-gi:1560799 | mtu:Rv0859  | fadA  | Possible acyl-CoA thiolase FadA                                                         |
| ncbi-gi:1560802 | mtu:Rv0889c | citA  | Probable citrate synthase II CitA                                                       |
| ncbi-gi:1560803 | mtu:Rv0896  | gltA2 | Probable citrate synthase I GltA2                                                       |
| ncbi-gi:1560821 | mtu:Rv1074c | fadA3 | Probable beta-ketoacyl CoA thiolase FadA3                                               |
| ncbi-gi:4488247 | mtu:Rv1093  | glyA1 | Serine hydroxymethyltransferase 1 GlyA1                                                 |

|                             |       |                                                                                                      |
|-----------------------------|-------|------------------------------------------------------------------------------------------------------|
| ncbi-gi:1560838 mtu:Rv1240  | mdh   | Probable malate dehydrogenase Mdh                                                                    |
| ncbi-gi:1560846 mtu:Rv1323  | fadA4 | Probable acetyl-CoA acetyltransferase FadA4 (acetoacetyl-CoA thiolase)                               |
| ncbi-gi:1560861 mtu:Rv1475c | acn   | Probable iron-regulated aconitate hydratase Acn (citrate hydro-lyase) (aconitase)                    |
| ncbi-gi:1560863 mtu:Rv1492  | mutA  | Probable methylmalonyl-CoA mutase small subunit MutA (MCM)                                           |
| ncbi-gi:1560863 mtu:Rv1493  | mutB  | Probable methylmalonyl-CoA mutase large subunit MutB (MCM)                                           |
| ncbi-gi:1560897 mtu:Rv1837c | glcB  | Malate synthase G GlcB                                                                               |
| ncbi-gi:1560935 mtu:Rv2220  | glnA1 | Glutamine synthetase GlnA1 (glutamine synthase) (GS-I)                                               |
| ncbi-gi:1560935 mtu:Rv2222c | glnA2 | Probable glutamine synthetase GlnA2 (glutamine synthase) (GS-II)                                     |
| ncbi-gi:1561041 mtu:Rv3280  | accD5 | Probable propionyl-CoA carboxylase beta chain 5 AccD5 (pccase) (propanoyl-CoA:carbon dioxide ligase) |
| ncbi-gi:1561069 mtu:Rv3556c | fadA6 | Probable acetyl-CoA acetyltransferase FadA6 (acetoacetyl-CoA thiolase)                               |

#### mtu00970 Aminoacyl-tRNA biosynthesis - Mycobacterium tuberculosis H37Rv (16)

|                             |       |                                                                                                                      |
|-----------------------------|-------|----------------------------------------------------------------------------------------------------------------------|
| ncbi-gi:1560843 mtu:Rv1292  | argS  | Probable arginyl-tRNA synthetase ArgS (ARGRS) (arginine--tRNA ligase)                                                |
| ncbi-gi:1560867 mtu:Rv1536  | ileS  | Isoleucyl-tRNA synthetase IleS                                                                                       |
| ncbi-gi:4488247 mtu:Rv1649  | pheS  | Probable phenylalanyl-tRNA synthetase, alpha chain PheS                                                              |
| ncbi-gi:1560878 mtu:Rv1650  | pheT  | Probable phenylalanyl-tRNA synthetase, beta chain PheT                                                               |
| ncbi-gi:1560949 mtu:Rv2357c | glyS  | Probable glycyl-tRNA synthetase GlyS (glycine--tRNA ligase) (GLYRS)                                                  |
| ncbi-gi:1560958 mtu:Rv2448c | valS  | Probable valyl-tRNA synthase protein ValS (valyl-tRNA synthetase) (valine--tRNA ligase) (valine transase)            |
| ncbi-gi:1560969 mtu:Rv2555c | alaS  | Probable alanyl-tRNA synthetase AlaS (alanine--tRNA ligase) (alanine transase) (ALARS)                               |
| ncbi-gi:1560970 mtu:Rv2572c | aspS  | Probable aspartyl-tRNA synthetase AspS (aspartate--tRNA ligase) (ASPRS) (aspartic acid transase)                     |
| ncbi-gi:1560975 mtu:Rv2614c | thrS  | Probable threonyl-tRNA synthetase ThrS (threonine-tRNA synthetase)(ThrRS) (threonine-tRNA ligase)                    |
| ncbi-gi:1560998 mtu:Rv2845c | proS  | Probable prolyl-tRNA synthetase ProS (proline--tRNA ligase) (PRORS) (global RNA synthesis factor) (proline transase) |
| ncbi-gi:5711704 mtu:Rv2992c | gltS  | Glutamyl-tRNA synthetase GltS (glutamate--tRNA ligase) (glutamyl-tRNA synthase) (GLURS)                              |
| ncbi-gi:1561014 mtu:Rv3009c | gatB  | Probable glutamyl-tRNA(GLN) amidotransferase (subunit B) GatB (Glu-ADT subunit B)                                    |
| ncbi-gi:4488247 mtu:Rv3011c | gatA  | Probable glutamyl-tRNA(GLN) amidotransferase (subunit A) GatA (Glu-ADT subunit A)                                    |
| ncbi-gi:1561047 mtu:Rv3336c | trpS  | Probable tryptophanyl-tRNA synthetase TrpS (tryptophan--tRNA ligase) (TRPRS) (tryptophan transase)                   |
| ncbi-gi:5711712 mtu:Rv3580c | cysS1 | CysteinyI-tRNA synthetase 1 CysS1 (cysteine--tRNA ligase 1) (CYSRS 1) (cysteine transase)                            |
| ncbi-gi:1561073 mtu:Rv3598c | lysS  | Lysyl-tRNA synthetase 1 LysS (lysine--tRNA ligase 1) (LysRS 1) (lysine transase)                                     |

#### mtu00190 Oxidative phosphorylation - Mycobacterium tuberculosis H37Rv (16)

|                             |      |                                                                                                                                                           |
|-----------------------------|------|-----------------------------------------------------------------------------------------------------------------------------------------------------------|
| ncbi-gi:1560738 mtu:Rv0247c |      | Probable succinate dehydrogenase [iron-sulfur subunit] (succinic dehydrogenase)                                                                           |
| ncbi-gi:1560738 mtu:Rv0248c |      | Probable succinate dehydrogenase [iron-sulfur subunit] (succinic dehydrogenase)                                                                           |
| ncbi-gi:1560844 mtu:Rv1306  | atpF | Probable ATP synthase B chain AtpF                                                                                                                        |
| ncbi-gi:1560844 mtu:Rv1307  | atpH | Probable ATP synthase delta chain AtpH                                                                                                                    |
| ncbi-gi:1560844 mtu:Rv1308  | atpA | Probable ATP synthase alpha chain AtpA                                                                                                                    |
| ncbi-gi:1560844 mtu:Rv1309  | atpG | Probable ATP synthase gamma chain AtpG                                                                                                                    |
| ncbi-gi:1560845 mtu:Rv1310  | atpD | Probable ATP synthase beta chain AtpD                                                                                                                     |
| ncbi-gi:1560845 mtu:Rv1311  | atpC | Probable ATP synthase epsilon chain AtpC                                                                                                                  |
| ncbi-gi:1560933 mtu:Rv2195  | qcrA | Probable rieske iron-sulfur protein QcrA                                                                                                                  |
| ncbi-gi:1560933 mtu:Rv2196  | qcrB | Probable ubiquinol-cytochrome C reductase QcrB (cytochrome B subunit)                                                                                     |
| ncbi-gi:1560933 mtu:Rv2200c | ctaC | Probable transmembrane cytochrome C oxidase (subunit II) CtaC                                                                                             |
| ncbi-gi:1561012 mtu:Rv2984  | ppk1 | Polyphosphate kinase PPK (polyphosphoric acid kinase) (ATP-polyphosphate phosphotransferase)                                                              |
| ncbi-gi:1561028 mtu:Rv3149  | nuoE | Probable NADH dehydrogenase I (chain E) NuoE (NADH-ubiquinone oxidoreductase chain E)                                                                     |
| ncbi-gi:1561028 mtu:Rv3150  | nuoF | Probable NADH dehydrogenase I (chain F) NuoF (NADH-ubiquinone oxidoreductase chain F)                                                                     |
| ncbi-gi:1561045 mtu:Rv3318  | sdhA | Probable succinate dehydrogenase (flavoprotein subunit) SdhA (succinic dehydrogenase) (fumarate reductase) (fumarate dehydrogenase) (fumaric hydrogenase) |
| ncbi-gi:1561076 mtu:Rv3628  | ppa  | Inorganic pyrophosphatase Ppa (pyrophosphate phospho-hydrolase) (PPASE) (inorganic diphosphatase) (diphosphate phospho-hydrolase)                         |

#### mtu00250 Alanine, aspartate and glutamate metabolism - Mycobacterium tuberculosis H37Rv (15)

|                             |       |                                                                                                                                                                                                                                                             |
|-----------------------------|-------|-------------------------------------------------------------------------------------------------------------------------------------------------------------------------------------------------------------------------------------------------------------|
| ncbi-gi:5711670 mtu:Rv0234c | gabD1 | Succinate-semialdehyde dehydrogenase [NADP+] dependent (SSDH) GabD1                                                                                                                                                                                         |
| ncbi-gi:1560749 mtu:Rv0357c | purA  | Probable adenylosuccinate synthetase PurA (imp--aspartate ligase) (ADSS) (ampsase)                                                                                                                                                                          |
| ncbi-gi:1560852 mtu:Rv1380  | pyrB  | Probable aspartate carbamoyltransferase PyrB (ATCase) (aspartate transcarbamylase)                                                                                                                                                                          |
| ncbi-gi:1560852 mtu:Rv1383  | carA  | Probable carbamoyl-phosphate synthase small chain CarA (carbamoyl-phosphate synthetase glutamine chain)                                                                                                                                                     |
| ncbi-gi:5711685 mtu:Rv1384  | carB  | Probable carbamoyl-phosphate synthase large chain CarB (carbamoyl-phosphate synthetase ammonia chain)                                                                                                                                                       |
| ncbi-gi:5711690 mtu:Rv1731  | gabD2 | Possible succinate-semialdehyde dehydrogenase [NADP+] dependent (SSDH) GabD2                                                                                                                                                                                |
| ncbi-gi:1560935 mtu:Rv2220  | glnA1 | Glutamine synthetase GlnA1 (glutamine synthase) (GS-I)                                                                                                                                                                                                      |
| ncbi-gi:1560935 mtu:Rv2222c | glnA2 | Probable glutamine synthetase GlnA2 (glutamine synthase) (GS-II)                                                                                                                                                                                            |
| ncbi-gi:1560961 mtu:Rv2476c | gdh   | Probable NAD-dependent glutamate dehydrogenase Gdh (NAD-Gdh) (NAD-dependent glutamic dehydrogenase)                                                                                                                                                         |
| ncbi-gi:1560972 mtu:Rv2589  | gabT  | 4-aminobutyrate aminotransferase GabT (gamma-amino-N-butyrate transaminase) (GABA transaminase) (glutamate:succinic semialdehyde transaminase) (GABA aminotransferase) (GABA-at)                                                                            |
| ncbi-gi:1560991 mtu:Rv2780  | ald   | Secreted L-alanine dehydrogenase Ald (40 kDa antigen) (TB43)                                                                                                                                                                                                |
| ncbi-gi:1561056 mtu:Rv3432c | gadB  | Probable glutamate decarboxylase GadB                                                                                                                                                                                                                       |
| ncbi-gi:1561057 mtu:Rv3436c | glmS  | Probable glucosamine--fructose-6-phosphate aminotransferase [isomerizing] GlmS (hexosephosphate aminotransferase) (D-fructose-6-phosphate amidotransferase) (GFAT) (L-glutamine-D-fructose-6-phosphate amidotransferase) (glucosamine-6-phosphate synthase) |
| ncbi-gi:1561099 mtu:Rv3858c | gltD  | Probable NADH-dependent glutamate synthase (small subunit) GltD (L-glutamate synthase) (L-glutamate synthetase) (NADH-glutamate synthase) (glutamate synthase (NADH)) (GLTS beta chain) (NADPH-GOGAT)                                                       |
| ncbi-gi:1561099 mtu:Rv3859c | gltB  | Probable ferredoxin-dependent glutamate synthase [NADPH] (large subunit) GltB (L-glutamate synthase) (L-glutamate synthetase) (NADH-glutamate synthase) (glutamate synthase (NADH))(NADPH-GOGAT)                                                            |

#### mtu00680 Methane metabolism - Mycobacterium tuberculosis H37Rv (15)

|                             |       |                                                                                            |
|-----------------------------|-------|--------------------------------------------------------------------------------------------|
| ncbi-gi:1560750 mtu:Rv0363c | fba   | Probable fructose-bisphosphate aldolase Fba                                                |
| ncbi-gi:1560754 mtu:Rv0408  | pta   | Probable phosphate acetyltransferase Pta (phosphotransacetylase)                           |
| ncbi-gi:5711673 mtu:Rv0489  | gpm1  | Probable phosphoglycerate mutase 1 Gpm1 (phosphoglyceromutase) (PGAM) (BPG-dependent PGAM) |
| ncbi-gi:5711677 mtu:Rv0761c | adhB  | Possible zinc-containing alcohol dehydrogenase NAD dependent AdhB                          |
| ncbi-gi:1560802 mtu:Rv0884c | serC  | Possible phosphoserine aminotransferase SerC (PSAT)                                        |
| ncbi-gi:1560816 mtu:Rv1023  | eno   | Probable enolase Eno                                                                       |
| ncbi-gi:4488247 mtu:Rv1093  | glyA1 | Serine hydroxymethyltransferase 1 GlyA1                                                    |
| ncbi-gi:4488247 mtu:Rv1099c | glpX  | Fructose 1,6-bisphosphatase GlpX                                                           |
| ncbi-gi:1560838 mtu:Rv1240  | mdh   | Probable malate dehydrogenase Mdh                                                          |
| ncbi-gi:1560916 mtu:Rv2029c | pfkB  | 6-phosphofructokinase PfkB (phosphohexokinase) (phosphofructokinase)                       |
| ncbi-gi:1560955 mtu:Rv2419c | gpgP  | Glucosyl-3-phosphoglycerate phosphatase GpgP                                               |
| ncbi-gi:5711704 mtu:Rv2996c | serA1 | Probable D-3-phosphoglycerate dehydrogenase SerA1 (PGDH)                                   |
| ncbi-gi:1561014 mtu:Rv3010c | pfkA  | Probable 6-phosphofructokinase PfkA (phosphohexokinase) (phosphofructokinase)              |

|                            |      |                                                                                                                                                                                                                                        |
|----------------------------|------|----------------------------------------------------------------------------------------------------------------------------------------------------------------------------------------------------------------------------------------|
| ncbi-gi:1561022:mtu:Rv3086 | adhD | Probable zinc-type alcohol dehydrogenase AdhD (aldehyde reductase)                                                                                                                                                                     |
| ncbi-gi:1561080:mtu:Rv3667 | acs  | Acetyl-coenzyme A synthetase Acs (acetate--CoA ligase) (acetyl-CoA synthetase) (acetyl-CoA synthase) (acyl-activating enzyme) (acetate thiokinase) (acetyl-activating enzyme) (acetate-coenzyme A ligase) (acetyl-coenzyme A synthase) |

#### mtu02020 Two-component system - Mycobacterium tuberculosis H37Rv (14)

|                             |       |                                                                                                                           |
|-----------------------------|-------|---------------------------------------------------------------------------------------------------------------------------|
| ncbi-gi:1560738:mtu:Rv0243  | fadA2 | Probable acetyl-CoA acyltransferase FadA2 (3-ketoacyl-CoA thiolase) (beta-ketothiolase)                                   |
| ncbi-gi:1560799:mtu:Rv0859  | fadA  | Possible acyl-CoA thiolase FadA                                                                                           |
| ncbi-gi:1560804:mtu:Rv0903c | prrA  | Two component response transcriptional regulatory protein PrrA                                                            |
| ncbi-gi:5711680:mtu:Rv0932c | pstS2 | Periplasmic phosphate-binding lipoprotein PstS2 (PBP-2) (PstS2)                                                           |
| ncbi-gi:1560821:mtu:Rv1074c | fadA3 | Probable beta-ketoacyl CoA thiolase FadA3                                                                                 |
| ncbi-gi:1560846:mtu:Rv1323  | fadA4 | Probable acetyl-CoA acetyltransferase FadA4 (acetoacetyl-CoA thiolase)                                                    |
| ncbi-gi:1560935:mtu:Rv2220  | glnA1 | Glutamine synthetase GlnA1 (glutamine synthase) (GS-I)                                                                    |
| ncbi-gi:1560935:mtu:Rv2222c | glnA2 | Probable glutamine synthetase GlnA2 (glutamine synthase) (GS-II)                                                          |
| ncbi-gi:1560963:mtu:Rv2498c | citE  | Probable citrate (pro-3S)-lyase (beta subunit) CitE (citrase) (citratase) (citritase) (citridesmolase) (citrase aldolase) |
| ncbi-gi:1561005:mtu:Rv2919c | glnB  | Probable nitrogen regulatory protein P-II GlnB                                                                            |
| ncbi-gi:1561021:mtu:Rv3075c |       | hypothetical protein                                                                                                      |
| ncbi-gi:1561026:mtu:Rv3133c | devR  | Two component transcriptional regulatory protein DevR (probably LuxR/UhpA-family)                                         |
| ncbi-gi:1561038:mtu:Rv3246c | mtrA  | Two component sensory transduction transcriptional regulatory protein MtrA                                                |
| ncbi-gi:1561069:mtu:Rv3556c | fadA6 | Probable acetyl-CoA acetyltransferase FadA6 (acetoacetyl-CoA thiolase)                                                    |

#### mtu01210 2-Oxocarboxylic acid metabolism - Mycobacterium tuberculosis H37Rv (14)

|                             |       |                                                                                                                                |
|-----------------------------|-------|--------------------------------------------------------------------------------------------------------------------------------|
| ncbi-gi:1560720:mtu:Rv0066c | icd2  | Probable isocitrate dehydrogenase [NADP] Icd2 (oxalosuccinate decarboxylase) (IDH) (NADP+-specific ICDH) (IDP)                 |
| ncbi-gi:1560733:mtu:Rv0189c | ilvD  | Probable dihydroxy-acid dehydratase IlvD (dad)                                                                                 |
| ncbi-gi:1560802:mtu:Rv0889c | citA  | Probable citrate synthase II CitA                                                                                              |
| ncbi-gi:1560803:mtu:Rv0896  | gltA2 | Probable citrate synthase I GltA2                                                                                              |
| ncbi-gi:1560861:mtu:Rv1475c | acn   | Probable iron-regulated aconitate hydratase Acn (citrate hydro-lyase) (aconitase)                                              |
| ncbi-gi:1560879:mtu:Rv1654  | argB  | Probable acetylglutamate kinase ArgB                                                                                           |
| ncbi-gi:1560879:mtu:Rv1655  | argD  | Probable acetylornithine aminotransferase ArgD                                                                                 |
| ncbi-gi:1560934:mtu:Rv2210c | ilvE  | Branched-chain amino acid transaminase IlvE                                                                                    |
| ncbi-gi:1561013:mtu:Rv2995c | leuB  | Probable 3-isopropylmalate dehydrogenase LeuB (beta-IPM dehydrogenase) (IMDH) (3-IPM-DH)                                       |
| ncbi-gi:4488247:mtu:Rv3001c | ilvC  | Probable KETOL-acid reductoisomerase IlvC (acetohydroxy-acid isomeroreductase) (alpha-keto-beta-hydroxylacil reductoisomerase) |
| ncbi-gi:1561013:mtu:Rv3002c | ilvN  | Probable acetolactate synthase (small subunit) IlvN (acetohydroxy-acid synthase) (AHAS) (ALS)                                  |
| ncbi-gi:5711704:mtu:Rv3003c | ilvB1 | Acetolactate synthase (large subunit) IlvB1 (acetohydroxy-acid synthase)                                                       |
| ncbi-gi:1561047:mtu:Rv3339c | icd1  | Probable isocitrate dehydrogenase [NADP] Icd1 (oxalosuccinate decarboxylase) (IDH) (NADP+-specific ICDH) (IDP)                 |
| ncbi-gi:3454620:mtu:Rv3710  | leuA  | 2-isopropylmalate synthase LeuA (alpha-isopropylmalate synthase) (alpha-IPM synthetase) (IPMS)                                 |

#### mtu00240 Pyrimidine metabolism - Mycobacterium tuberculosis H37Rv (14)

|                             |       |                                                                                                                                                                                              |
|-----------------------------|-------|----------------------------------------------------------------------------------------------------------------------------------------------------------------------------------------------|
| ncbi-gi:1560714:mtu:Rv0002  | dnaN  | DNA polymerase III (beta chain) DnaN (DNA nucleotidyltransferase)                                                                                                                            |
| ncbi-gi:1560780:mtu:Rv0667  | rpoB  | DNA-directed RNA polymerase (beta chain) RpoB (transcriptase beta chain) (RNA polymerase beta subunit)                                                                                       |
| ncbi-gi:1560780:mtu:Rv0668  | rpoC  | DNA-directed RNA polymerase (beta' chain) RpoC (transcriptase beta' chain) (RNA polymerase beta' subunit)                                                                                    |
| ncbi-gi:1560851:mtu:Rv1379  | pyrR  | Probable pyrimidine operon regulatory protein PyrR                                                                                                                                           |
| ncbi-gi:1560852:mtu:Rv1380  | pyrB  | Probable aspartate carbamoyltransferase PyrB (ATCase) (aspartate transcarbamylase)                                                                                                           |
| ncbi-gi:1560852:mtu:Rv1383  | carA  | Probable carbamoyl-phosphate synthase small chain CarA (carbamoyl-phosphate synthetase glutamine chain)                                                                                      |
| ncbi-gi:5711685:mtu:Rv1384  | carB  | Probable carbamoyl-phosphate synthase large chain CarB (carbamoyl-phosphate synthetase ammonia chain)                                                                                        |
| ncbi-gi:1560876:mtu:Rv1629  | polA  | Probable DNA polymerase I PolA                                                                                                                                                               |
| ncbi-gi:1560883:mtu:Rv1699  | pyrG  | Probable CTP synthase PyrG                                                                                                                                                                   |
| ncbi-gi:1560983:mtu:Rv2697c | dut   | Probable deoxyuridine 5'-triphosphate nucleotidohydrolase Dut (dUTPase) (dUTP pyrophosphatase) (deoxyuridine 5'-triphosphatase) (dUTP diphosphatase) (deoxyuridine-triphosphatase)           |
| ncbi-gi:1560992:mtu:Rv2783c | gpsI  | Bifunctional protein polyribonucleotide nucleotidyltransferase GpsI: guanosine pentaphosphate synthetase + polyribonucleotide nucleotidyltransferase (polynucleotide phosphorylase) (pnpase) |
| ncbi-gi:5711705:mtu:Rv3048c | nrdF2 | Ribonucleoside-diphosphate reductase (beta chain) NrdF2 (ribonucleotide reductase small subunit) (R2F protein)                                                                               |
| ncbi-gi:1561018:mtu:Rv3051c | nrdE  | Ribonucleoside-diphosphate reductase (alpha chain) NrdE (ribonucleotide reductase small subunit) (R1F protein)                                                                               |
| ncbi-gi:1561059:mtu:Rv3457c | rpoA  | Probable DNA-directed RNA polymerase (alpha chain) RpoA (transcriptase alpha chain) (RNA polymerase alpha subunit) (DNA-directed RNA nucleotidyltransferase)                                 |

#### mtu00260 Glycine, serine and threonine metabolism - Mycobacterium tuberculosis H37Rv (12)

|                             |       |                                                                                                                                    |
|-----------------------------|-------|------------------------------------------------------------------------------------------------------------------------------------|
| ncbi-gi:1560760:mtu:Rv0462  | lpdC  | Dihydrolipoamide dehydrogenase LpdC (lipoamide reductase (NADH)) (lipoyl dehydrogenase) (dihydrolipoyl dehydrogenase) (diaphorase) |
| ncbi-gi:5711673:mtu:Rv0489  | gpmI  | Probable phosphoglycerate mutase 1 GpmI (phosphoglyceromutase) (PGAM) (BPG-dependent PGAM)                                         |
| ncbi-gi:5711678:mtu:Rv0794c | lpdB  | Probable oxidoreductase                                                                                                            |
| ncbi-gi:1560802:mtu:Rv0884c | serC  | Possible phosphoserine aminotransferase SerC (PSAT)                                                                                |
| ncbi-gi:5711682:mtu:Rv1077  | cbs   | Probable cystathionine beta-synthase Cbs (serine sulfhydrase) (beta-thionase) (hemoprotein H-450)                                  |
| ncbi-gi:4488247:mtu:Rv1093  | glyA1 | Serine hydroxymethyltransferase 1 GlyA1                                                                                            |
| ncbi-gi:1560843:mtu:Rv1295  | thrC  | Threonine synthase ThrC (ts)                                                                                                       |
| ncbi-gi:1560869:mtu:Rv1559  | ilvA  | Probable threonine dehydratase IlvA                                                                                                |
| ncbi-gi:1560896:mtu:Rv1832  | gevB  | Probable glycine dehydrogenase GcvB (glycine decarboxylase) (glycine cleavage system P-protein)                                    |
| ncbi-gi:1560934:mtu:Rv2211c | gevT  | Probable aminomethyltransferase GcvT (glycine cleavage system T protein)                                                           |
| ncbi-gi:1560955:mtu:Rv2419c | gpgP  | Glucosyl-3-phosphoglycerate phosphatase GpgP                                                                                       |
| ncbi-gi:5711704:mtu:Rv2996c | serA1 | Probable D-3-phosphoglycerate dehydrogenase SerA1 (PGDH)                                                                           |

#### mtu00903 Limonene and pinene degradation - Mycobacterium tuberculosis H37Rv (12)

|                             |        |                                                                                                  |
|-----------------------------|--------|--------------------------------------------------------------------------------------------------|
| ncbi-gi:1560736:mtu:Rv0222  | echA1  | Probable enoyl-CoA hydratase EchA1 (enoyl hydrase) (unsaturated acyl-CoA hydratase) (crotonase)  |
| ncbi-gi:1560736:mtu:Rv0223c |        | Probable aldehyde dehydrogenase                                                                  |
| ncbi-gi:1560777:mtu:Rv0632c | echA3  | Probable enoyl-CoA hydratase EchA3 (enoyl hydrase) (unsaturated acyl-CoA hydratase) (crotonase)  |
| ncbi-gi:5711676:mtu:Rv0675  | echA5  | Probable enoyl-CoA hydratase EchA5 (enoyl hydrase) (unsaturated acyl-CoA hydratase) (crotonase)  |
| ncbi-gi:1560800:mtu:Rv0860  | fadB   | Probable fatty oxidation protein FadB                                                            |
| ncbi-gi:1560804:mtu:Rv0905  | echA6  | Possible enoyl-CoA hydratase EchA6 (enoyl hydrase) (unsaturated acyl-CoA hydratase) (crotonase)  |
| ncbi-gi:1560811:mtu:Rv0971c | echA7  | Probable enoyl-CoA hydratase EchA7 (enoyl hydrase) (unsaturated acyl-CoA hydratase) (crotonase)  |
| ncbi-gi:1560821:mtu:Rv1070c | echA8  | Probable enoyl-CoA hydratase EchA8 (enoyl hydrase) (unsaturated acyl-CoA hydratase) (crotonase)  |
| ncbi-gi:1560821:mtu:Rv1071c | echA9  | Possible enoyl-CoA hydratase EchA9 (enoyl hydrase) (unsaturated acyl-CoA hydratase) (crotonase)  |
| ncbi-gi:1560981:mtu:Rv2679  | echA15 | Probable enoyl-CoA hydratase EchA15 (enoyl hydrase) (unsaturated acyl-CoA hydratase) (crotonase) |

ncbi-gi:1561065;mtu:Rv3516 echA19 Possible enoyl-CoA hydratase EchA19 (enoyl hydrase) (unsaturated acyl-CoA hydratase) (crotonase)  
ncbi-gi:1561091;mtu:Rv3774 echA21 Possible enoyl-CoA hydratase EchA21 (enoyl hydrase) (unsaturated acyl-CoA hydratase) (crotonase)

#### mtu00360 Phenylalanine metabolism - Mycobacterium tuberculosis H37Rv (12)

ncbi-gi:1560736;mtu:Rv0222 echA1 Probable enoyl-CoA hydratase EchA1 (enoyl hydrase) (unsaturated acyl-CoA hydratase) (crotonase)  
ncbi-gi:1560760;mtu:Rv0468 fadB2 3-hydroxybutyryl-CoA dehydrogenase FadB2 (beta-hydroxybutyryl-CoA dehydrogenase) (BHBD)  
ncbi-gi:1560777;mtu:Rv0632c echA3 Probable enoyl-CoA hydratase EchA3 (enoyl hydrase) (unsaturated acyl-CoA hydratase) (crotonase)  
ncbi-gi:5711676;mtu:Rv0675 echA5 Probable enoyl-CoA hydratase EchA5 (enoyl hydrase) (unsaturated acyl-CoA hydratase) (crotonase)  
ncbi-gi:1560804;mtu:Rv0905 echA6 Possible enoyl-CoA hydratase EchA6 (enoyl hydrase) (unsaturated acyl-CoA hydratase) (crotonase)  
ncbi-gi:1560811;mtu:Rv0971c echA7 Probable enoyl-CoA hydratase EchA7 (enoyl hydrase) (unsaturated acyl-CoA hydratase) (crotonase)  
ncbi-gi:1560821;mtu:Rv1070c echA8 Probable enoyl-CoA hydratase EchA8 (enoyl hydrase) (unsaturated acyl-CoA hydratase) (crotonase)  
ncbi-gi:1560821;mtu:Rv1071c echA9 Possible enoyl-CoA hydratase EchA9 (enoyl hydrase) (unsaturated acyl-CoA hydratase) (crotonase)  
ncbi-gi:1560904;mtu:Rv1908c katG Catalase-peroxidase-peroxynitritase T KatG  
ncbi-gi:1560981;mtu:Rv2679 echA15 Probable enoyl-CoA hydratase EchA15 (enoyl hydrase) (unsaturated acyl-CoA hydratase) (crotonase)  
ncbi-gi:1561065;mtu:Rv3516 echA19 Possible enoyl-CoA hydratase EchA19 (enoyl hydrase) (unsaturated acyl-CoA hydratase) (crotonase)  
ncbi-gi:1561091;mtu:Rv3774 echA21 Possible enoyl-CoA hydratase EchA21 (enoyl hydrase) (unsaturated acyl-CoA hydratase) (crotonase)

#### mtu00030 Pentose phosphate pathway - Mycobacterium tuberculosis H37Rv (11)

ncbi-gi:1560750;mtu:Rv0363c fba Probable fructose-bisphosphate aldolase Fba  
ncbi-gi:1560808;mtu:Rv0946c pgi Probable glucose-6-phosphate isomerase Pgi (GPI) (phosphoglucose isomerase) (phosphohexose isomerase) (phi)  
ncbi-gi:1560815;mtu:Rv1017c prsA Probable ribose-phosphate pyrophosphokinase PrsA (phosphoribosyl pyrophosphate synthetase) (PRPP synthetase)  
ncbi-gi:4488247;mtu:Rv1099c glpX Fructose 1,6-bisphosphatase GlpX  
ncbi-gi:5711683;mtu:Rv1121 zwf1 Probable glucose-6-phosphate 1-dehydrogenase Zwf1 (G6PD)  
ncbi-gi:1560826;mtu:Rv1122 gnd2 Probable 6-phosphogluconate dehydrogenase,decarboxylating Gnd2  
ncbi-gi:1560858;mtu:Rv1448c tal Probable transaldolase Tal  
ncbi-gi:1560858;mtu:Rv1449c tkt Transketolase Tkt (TK)  
ncbi-gi:1560916;mtu:Rv2029c pfkB 6-phosphofructokinase PfkB (phosphohexokinase) (phosphofructokinase)  
ncbi-gi:5711699;mtu:Rv2465c rpiB Ribose-5-phosphate isomerase  
ncbi-gi:1561014;mtu:Rv3010c pfkA Probable 6-phosphofructokinase PfkA (phosphohexokinase) (phosphofructokinase)

#### mtu00930 Caprolactam degradation - Mycobacterium tuberculosis H37Rv (11)

ncbi-gi:1560736;mtu:Rv0222 echA1 Probable enoyl-CoA hydratase EchA1 (enoyl hydrase) (unsaturated acyl-CoA hydratase) (crotonase)  
ncbi-gi:1560777;mtu:Rv0632c echA3 Probable enoyl-CoA hydratase EchA3 (enoyl hydrase) (unsaturated acyl-CoA hydratase) (crotonase)  
ncbi-gi:5711676;mtu:Rv0675 echA5 Probable enoyl-CoA hydratase EchA5 (enoyl hydrase) (unsaturated acyl-CoA hydratase) (crotonase)  
ncbi-gi:1560800;mtu:Rv0860 fadB Probable fatty oxidation protein FadB  
ncbi-gi:1560804;mtu:Rv0905 echA6 Possible enoyl-CoA hydratase EchA6 (enoyl hydrase) (unsaturated acyl-CoA hydratase) (crotonase)  
ncbi-gi:1560811;mtu:Rv0971c echA7 Probable enoyl-CoA hydratase EchA7 (enoyl hydrase) (unsaturated acyl-CoA hydratase) (crotonase)  
ncbi-gi:1560821;mtu:Rv1070c echA8 Probable enoyl-CoA hydratase EchA8 (enoyl hydrase) (unsaturated acyl-CoA hydratase) (crotonase)  
ncbi-gi:1560821;mtu:Rv1071c echA9 Possible enoyl-CoA hydratase EchA9 (enoyl hydrase) (unsaturated acyl-CoA hydratase) (crotonase)  
ncbi-gi:1560981;mtu:Rv2679 echA15 Probable enoyl-CoA hydratase EchA15 (enoyl hydrase) (unsaturated acyl-CoA hydratase) (crotonase)  
ncbi-gi:1561065;mtu:Rv3516 echA19 Possible enoyl-CoA hydratase EchA19 (enoyl hydrase) (unsaturated acyl-CoA hydratase) (crotonase)  
ncbi-gi:1561091;mtu:Rv3774 echA21 Possible enoyl-CoA hydratase EchA21 (enoyl hydrase) (unsaturated acyl-CoA hydratase) (crotonase)

#### mtu00627 Aminobenzoate degradation - Mycobacterium tuberculosis H37Rv (11)

ncbi-gi:1560736;mtu:Rv0222 echA1 Probable enoyl-CoA hydratase EchA1 (enoyl hydrase) (unsaturated acyl-CoA hydratase) (crotonase)  
ncbi-gi:1560777;mtu:Rv0632c echA3 Probable enoyl-CoA hydratase EchA3 (enoyl hydrase) (unsaturated acyl-CoA hydratase) (crotonase)  
ncbi-gi:5711676;mtu:Rv0675 echA5 Probable enoyl-CoA hydratase EchA5 (enoyl hydrase) (unsaturated acyl-CoA hydratase) (crotonase)  
ncbi-gi:1560804;mtu:Rv0905 echA6 Possible enoyl-CoA hydratase EchA6 (enoyl hydrase) (unsaturated acyl-CoA hydratase) (crotonase)  
ncbi-gi:1560811;mtu:Rv0971c echA7 Probable enoyl-CoA hydratase EchA7 (enoyl hydrase) (unsaturated acyl-CoA hydratase) (crotonase)  
ncbi-gi:1560821;mtu:Rv1070c echA8 Probable enoyl-CoA hydratase EchA8 (enoyl hydrase) (unsaturated acyl-CoA hydratase) (crotonase)  
ncbi-gi:1560821;mtu:Rv1071c echA9 Possible enoyl-CoA hydratase EchA9 (enoyl hydrase) (unsaturated acyl-CoA hydratase) (crotonase)  
ncbi-gi:1560981;mtu:Rv2679 echA15 Probable enoyl-CoA hydratase EchA15 (enoyl hydrase) (unsaturated acyl-CoA hydratase) (crotonase)  
ncbi-gi:5711703;mtu:Rv2922A acyP Probable acylphosphatase AcyP (acylphosphate phosphohydrolase)  
ncbi-gi:1561065;mtu:Rv3516 echA19 Possible enoyl-CoA hydratase EchA19 (enoyl hydrase) (unsaturated acyl-CoA hydratase) (crotonase)  
ncbi-gi:1561091;mtu:Rv3774 echA21 Possible enoyl-CoA hydratase EchA21 (enoyl hydrase) (unsaturated acyl-CoA hydratase) (crotonase)

#### mtu00270 Cysteine and methionine metabolism - Mycobacterium tuberculosis H37Rv (10)

ncbi-gi:1560753;mtu:Rv0391 metZ Probable O-succinylhomoserine sulphydrylase MetZ (OSH sulphydrylase)  
ncbi-gi:1560795;mtu:Rv0815c cysA2 Probable thiosulfate sulfurtransferase CysA2 (rhodanese-like protein) (thiosulfate cyanide transsulfurase) (thiosulfate thiotransferase)  
ncbi-gi:5711682;mtu:Rv1077 cbs Probable cystathionine beta-synthase Cbs (serine sulphydrase) (beta-thionase) (hemoprotein H-450)  
ncbi-gi:1560821;mtu:Rv1079 metB Cystathionine gamma-synthase MetB (CGS) (O-succinylhomoserine [thiol]-lyase)  
ncbi-gi:1560827;mtu:Rv1133c metE Probable 5-methyltetrahydropteroyltriglutamate--homocysteine methyltransferase MetE (methionine synthase, vitamin-B12 independent isozyme)  
ncbi-gi:1560853;mtu:Rv1392 metK Probable S-adenosylmethionine synthetase MetK (mat) (AdoMet synthetase) (methionine adenosyltransferase)  
ncbi-gi:5711697;mtu:Rv2334 cysK1 Cysteine synthase a CysK1 (O-acetylserine sulphydrylase A) (O-acetylserine (thiol)-lyase A) (CSASE A)  
ncbi-gi:1561038;mtu:Rv3248c sahH Probable adenosylhomocysteinase SahH (S-adenosyl-L-homocysteine hydrolase) (adohcycase)  
ncbi-gi:1561041;mtu:Rv3283 sseA Probable thiosulfate sulfurtransferase SseA (rhodanese) (thiosulfate cyanide transsulfurase) (thiosulfate thiotransferase)  
ncbi-gi:1561047;mtu:Rv3340 metC Probable O-acetylhomoserine sulphydrylase MetC (homocysteine synthase) (O-acetylhomoserine (thiol)-lyase) (OAH sulphydrylase) (O-acetyl-L-homoserine sulphydrylase)

#### mtu03018 RNA degradation - Mycobacterium tuberculosis H37Rv (9)

ncbi-gi:1560749;mtu:Rv0350 dnaK Probable chaperone protein DnaK (heat shock protein 70) (heat shock 70 kDa protein) (HSP70)  
ncbi-gi:1560758;mtu:Rv0440 groEL2 60 kDa chaperonin 2 GroEL2 (protein CPN60-2) (GroEL protein 2) (65 kDa antigen) (heat shock protein 65) (cell wall protein A) (antigen A)  
ncbi-gi:1560816;mtu:Rv1023 eno Probable enolase Eno  
ncbi-gi:1560843;mtu:Rv1297 rho Probable transcription termination factor Rho homolog  
ncbi-gi:1560958;mtu:Rv2444c rne Possible ribonuclease E Rne

|                  |             |        |                                                                                                                                                                                              |
|------------------|-------------|--------|----------------------------------------------------------------------------------------------------------------------------------------------------------------------------------------------|
| ncbi-gi:15609921 | mtu:Rv2783c | gpsI   | Bifunctional protein polyribonucleotide nucleotidyltransferase GpsI: guanosine pentaphosphate synthetase + polyribonucleotide nucleotidyltransferase (polynucleotide phosphorylase) (pnpase) |
| ncbi-gi:1561012  | mtu:Rv2984  | ppk1   | Polyphosphate kinase PPK (polyphosphoric acid kinase) (ATP-polyphosphate phosphotransferase)                                                                                                 |
| ncbi-gi:1561055  | mtu:Rv3417c | groEL1 | 60 kDa chaperonin 1 GroEL1 (protein CPN60-1) (GroEL protein 1)                                                                                                                               |
| ncbi-gi:5711716  | mtu:Rv3907c | pcnA   | Probable poly(A) polymerase PcnA (polynucleotide adenyllyltransferase) (NTP polymerase) (RNA adenylating enzyme) (poly(A) polymerase)                                                        |

#### mtu00770 Pantothenate and CoA biosynthesis - Mycobacterium tuberculosis H37Rv (9)

|                 |             |       |                                                                                                                                             |
|-----------------|-------------|-------|---------------------------------------------------------------------------------------------------------------------------------------------|
| ncbi-gi:1560733 | mtu:Rv0189c | ilvD  | Probable dihydroxy-acid dehydratase IlvD (dad)                                                                                              |
| ncbi-gi:1560853 | mtu:Rv1391  | dfp   | Probable DNA/pantothenate metabolism flavoprotein homolog Dfp                                                                               |
| ncbi-gi:1560876 | mtu:Rv1631  | coaE  | Probable dephospho-CoA kinase CoaE (dephosphocoenzyme a kinase)                                                                             |
| ncbi-gi:1560934 | mtu:Rv2210c | ilvE  | Branched-chain amino acid transaminase IlvE                                                                                                 |
| ncbi-gi:1561010 | mtu:Rv2965c | kdtB  | Probable phosphopantetheine adenyllyltransferase KdtB (pantetheine-phosphate adenyllyltransferase) (PPAT) (dephospho-CoA pyrophosphorylase) |
| ncbi-gi:4488247 | mtu:Rv3001c | ilvC  | Probable KETOL-acid reductoisomerase IlvC (acetohydroxy-acid isomeroreductase) (alpha-keto-beta-hydroxylacil reductoisomerase)              |
| ncbi-gi:1561013 | mtu:Rv3002c | ilvN  | Probable acetolactate synthase (small subunit) IlvN (acetohydroxy-acid synthase) (AHAS) (ALS)                                               |
| ncbi-gi:5711704 | mtu:Rv3003c | ilvB1 | Acetolactate synthase (large subunit) IlvB1 (acetohydroxy-acid synthase)                                                                    |
| ncbi-gi:1561073 | mtu:Rv3600c |       | hypothetical protein                                                                                                                        |

#### mtu00520 Amino sugar and nucleotide sugar metabolism - Mycobacterium tuberculosis H37Rv (8)

|                 |             |       |                                                                                                                                                                                                                                                             |
|-----------------|-------------|-------|-------------------------------------------------------------------------------------------------------------------------------------------------------------------------------------------------------------------------------------------------------------|
| ncbi-gi:1560762 | mtu:Rv0482  | murB  | Probable UDP-N-acetylenolpyruvoylglucosamine reductase MurB (UDP-N-acetylmuramate dehydrogenase)                                                                                                                                                            |
| ncbi-gi:1560808 | mtu:Rv0946c | pgi   | Probable glucose-6-phosphate isomerase Pgi (GPI) (phosphoglucose isomerase) (phosphohexose isomerase) (phi)                                                                                                                                                 |
| ncbi-gi:1560815 | mtu:Rv1018c | glmU  | Probable UDP-N-acetylglucosamine pyrophosphorylase GlmU                                                                                                                                                                                                     |
| ncbi-gi:1560845 | mtu:Rv1315  | murA  | Probable UDP-N-acetylglucosamine 1-carboxyvinyltransferase MurA                                                                                                                                                                                             |
| ncbi-gi:1561039 | mtu:Rv3255c | manA  | Probable mannose-6-phosphate isomerase ManA (phosphomannose isomerase) (phosphomannoisomerase) (PMI) (phosphohexoisomerase) (phosphohexomutase)                                                                                                             |
| ncbi-gi:5711708 | mtu:Rv3264c | manB  | D-alpha-D-mannose-1-phosphate guanylyltransferase ManB (D-alpha-D-heptose-1-phosphate guanylyltransferase)                                                                                                                                                  |
| ncbi-gi:1561057 | mtu:Rv3436c | glmS  | Probable glucosamine--fructose-6-phosphate aminotransferase [isomerizing] GlmS (hexosephosphate aminotransferase) (D-fructose-6-phosphate amidotransferase) (GFAT) (L-glutamine-D-fructose-6-phosphate amidotransferase) (glucosamine-6-phosphate synthase) |
| ncbi-gi:5711713 | mtu:Rv3634c | galE1 | UDP-glucose 4-epimerase GalE1 (galactowaldenase) (UDP-galactose 4-epimerase) (uridine diphosphate galactose 4-epimerase) (uridine diphospho-galactose 4-epimerase)                                                                                          |

#### mtu00480 Glutathione metabolism - Mycobacterium tuberculosis H37Rv (8)

|                 |             |      |                                                                                                                  |
|-----------------|-------------|------|------------------------------------------------------------------------------------------------------------------|
| ncbi-gi:1560720 | mtu:Rv0066c | icd2 | Probable isocitrate dehydrogenase [NADP] Icd2 (oxalosuccinate decarboxylase) (IDH) (NADP+-specific ICDH) (IDP)   |
| ncbi-gi:1560740 | mtu:Rv0266c | oplA | Probable 5-oxoprolinase OplA (5-oxo-L-prolinase) (pyroglutamase) (5-OPASE)                                       |
| ncbi-gi:1560791 | mtu:Rv0773c | ggtA | Probable bifunctional acylase GgtA: cephalosporin acylase (GL-7ACA acylase) + gamma-glutamyltranspeptidase (GGT) |
| ncbi-gi:5711683 | mtu:Rv1121  | zwf1 | Probable glucose-6-phosphate 1-dehydrogenase Zwf1 (G6PD)                                                         |
| ncbi-gi:1560826 | mtu:Rv1122  | gnd2 | Probable 6-phosphogluconate dehydrogenase,decarboxylating Gnd2                                                   |
| ncbi-gi:1560935 | mtu:Rv2213  | pepB | Probable aminopeptidase PepB                                                                                     |
| ncbi-gi:5711699 | mtu:Rv2467  | pepN | Probable aminopeptidase N PepN (Lysyl aminopeptidase) (LYS-AP) (alanine aminopeptidase)                          |
| ncbi-gi:1561047 | mtu:Rv3339c | icd1 | Probable isocitrate dehydrogenase [NADP] Icd1 (oxalosuccinate decarboxylase) (IDH) (NADP+-specific ICDH) (IDP)   |

#### mtu00900 Terpenoid backbone biosynthesis - Mycobacterium tuberculosis H37Rv (8)

|                 |             |       |                                                                                         |
|-----------------|-------------|-------|-----------------------------------------------------------------------------------------|
| ncbi-gi:1560738 | mtu:Rv0243  | fadA2 | Probable acetyl-CoA acyltransferase FadA2 (3-ketoacyl-CoA thiolase) (beta-ketothiolase) |
| ncbi-gi:1560799 | mtu:Rv0859  | fadA  | Possible acyl-CoA thiolase FadA                                                         |
| ncbi-gi:1560821 | mtu:Rv1074c | fadA3 | Probable beta-ketoacyl CoA thiolase FadA3                                               |
| ncbi-gi:5711682 | mtu:Rv1110  | lytB2 | Probable LYTB-related protein LytB2                                                     |
| ncbi-gi:1560846 | mtu:Rv1323  | fadA4 | Probable acetyl-CoA acetyltransferase FadA4 (acetoacetyl-CoA thiolase)                  |
| ncbi-gi:1561000 | mtu:Rv2868c | gepE  | Probable GepE protein                                                                   |
| ncbi-gi:1561069 | mtu:Rv3556c | fadA6 | Probable acetyl-CoA acetyltransferase FadA6 (acetoacetyl-CoA thiolase)                  |
| ncbi-gi:1561071 | mtu:Rv3581c | ispF  | Probable 2C-methyl-D-erythritol 2,4-cyclodiphosphate synthase IspF (MECPS)              |

#### mtu00290 Valine, leucine and isoleucine biosynthesis - Mycobacterium tuberculosis H37Rv (8)

|                 |             |       |                                                                                                                                |
|-----------------|-------------|-------|--------------------------------------------------------------------------------------------------------------------------------|
| ncbi-gi:1560733 | mtu:Rv0189c | ilvD  | Probable dihydroxy-acid dehydratase IlvD (dad)                                                                                 |
| ncbi-gi:1560869 | mtu:Rv1559  | ilvA  | Probable threonine dehydratase IlvA                                                                                            |
| ncbi-gi:1560934 | mtu:Rv2210c | ilvE  | Branched-chain amino acid transaminase IlvE                                                                                    |
| ncbi-gi:1561013 | mtu:Rv2995c | leuB  | Probable 3-isopropylmalate dehydrogenase LeuB (beta-IPM dehydrogenase) (IMDH) (3-IPM-DH)                                       |
| ncbi-gi:4488247 | mtu:Rv3001c | ilvC  | Probable KETOL-acid reductoisomerase IlvC (acetohydroxy-acid isomeroreductase) (alpha-keto-beta-hydroxylacil reductoisomerase) |
| ncbi-gi:1561013 | mtu:Rv3002c | ilvN  | Probable acetolactate synthase (small subunit) IlvN (acetohydroxy-acid synthase) (AHAS) (ALS)                                  |
| ncbi-gi:5711704 | mtu:Rv3003c | ilvB1 | Acetolactate synthase (large subunit) IlvB1 (acetohydroxy-acid synthase)                                                       |
| ncbi-gi:3454620 | mtu:Rv3710  | leuA  | 2-isopropylmalate synthase LeuA (alpha-isopropylmalate synthase) (alpha-IPM synthetase) (IPMS)                                 |

#### mtu00400 Phenylalanine, tyrosine and tryptophan biosynthesis - Mycobacterium tuberculosis H37Rv (8)

|                 |             |      |                                                                                                                         |
|-----------------|-------------|------|-------------------------------------------------------------------------------------------------------------------------|
| ncbi-gi:1560874 | mtu:Rv1603  | hisA | Probable phosphoribosylformimino-5-aminoimidazole carboxamide ribotide isomerase HisA                                   |
| ncbi-gi:1560874 | mtu:Rv1611  | trpC | Probable indole-3-glycerol phosphate synthase TrpC                                                                      |
| ncbi-gi:1560931 | mtu:Rv2178c | aroG | 3-deoxy-D-arabino-heptulosonate 7-phosphate synthase AroG (DAHP synthetase, phenylalanine-repressible)                  |
| ncbi-gi:1560967 | mtu:Rv2537c | aroD | 3-dehydroquinate dehydratase AroD (AROQ) (3-dehydroquinase) (type II dhqase)                                            |
| ncbi-gi:1560967 | mtu:Rv2538c | aroB | 3-dehydroquinate synthase AroB                                                                                          |
| ncbi-gi:1560967 | mtu:Rv2540c | aroF | Probable chorismate synthase AroF (5-enolpyruvylshikimate-3-phosphate phospholyase)                                     |
| ncbi-gi:1561036 | mtu:Rv3227  | aroA | 3-phosphoshikimate 1-carboxyvinyltransferase AroA (5-enolpyruvylshikimate-3-phosphate synthase) (EPSP synthase) (EPSPS) |
| ncbi-gi:1561097 | mtu:Rv3838c | pheA | Prephenate dehydratase PheA                                                                                             |

#### mtu00051 Fructose and mannose metabolism - Mycobacterium tuberculosis H37Rv (8)

|                 |             |      |                                                                      |
|-----------------|-------------|------|----------------------------------------------------------------------|
| ncbi-gi:1560750 | mtu:Rv0363c | fba  | Probable fructose-bisphosphate aldolase Fba                          |
| ncbi-gi:4488247 | mtu:Rv1099c | glpX | Fructose 1,6-bisphosphatase GlpX                                     |
| ncbi-gi:1560857 | mtu:Rv1438  | tpi  | Probable triosephosphate isomerase Tpi (TIM)                         |
| ncbi-gi:1560916 | mtu:Rv2029c | pfkB | 6-phosphofructokinase PfkB (phosphohexokinase) (phosphofructokinase) |
| ncbi-gi:5711699 | mtu:Rv2465c | rfpB | Ribose-5-phosphate isomerase                                         |



|                              |      |                                                                                                                                                 |
|------------------------------|------|-------------------------------------------------------------------------------------------------------------------------------------------------|
| ncbi-gi:1561014' mtu:Rv3010c | pfkA | Probable 6-phosphofructokinase PfkA (phosphohexokinase) (phosphofructokinase)                                                                   |
| ncbi-gi:1561039 mtu:Rv3255c  | manA | Probable mannose-6-phosphate isomerase ManA (phosphomannose isomerase) (phosphomannoisomerase) (PMI) (phosphohexoisomerase) (phosphohexomutase) |
| ncbi-gi:5711708 mtu:Rv3264c  | manB | D-alpha-D-mannose-1-phosphate guanylyltransferase ManB (D-alpha-D-heptose-1-phosphate guanylyltransferase)                                      |

#### mtu00910 Nitrogen metabolism - Mycobacterium tuberculosis H37Rv (7)

|                              |       |                                                                                                                                                                                                       |
|------------------------------|-------|-------------------------------------------------------------------------------------------------------------------------------------------------------------------------------------------------------|
| ncbi-gi:1560842' mtu:Rv1284  | canA  | Beta-carbonic anhydrase                                                                                                                                                                               |
| ncbi-gi:1560935' mtu:Rv2220  | glnA1 | Glutamine synthetase GlnA1 (glutamine synthase) (GS-I)                                                                                                                                                |
| ncbi-gi:1560935' mtu:Rv2222c | glnA2 | Probable glutamine synthetase GlnA2 (glutamine synthase) (GS-II)                                                                                                                                      |
| ncbi-gi:1560961' mtu:Rv2476c | gdh   | Probable NAD-dependent glutamate dehydrogenase Gdh (NAD-Gdh) (NAD-dependent glutamic dehydrogenase)                                                                                                   |
| ncbi-gi:1560991' mtu:Rv2781c |       | Possible alanine rich oxidoreductase                                                                                                                                                                  |
| ncbi-gi:1561099' mtu:Rv3858c | gltD  | Probable NADH-dependent glutamate synthase (small subunit) GltD (L-glutamate synthase) (L-glutamate synthetase) (NADH-glutamate synthase) (glutamate synthase (NADH)) (GLTS beta chain) (NADPH-GOGAT) |
| ncbi-gi:1561099' mtu:Rv3859c | gltB  | Probable ferredoxin-dependent glutamate synthase [NADPH] (large subunit) GltB (L-glutamate synthase) (L-glutamate synthetase) (NADH-glutamate synthase) (glutamate synthase (NADH))(NADPH-GOGAT)      |

#### mtu00330 Arginine and proline metabolism - Mycobacterium tuberculosis H37Rv (7)

|                              |       |                                                                                                     |
|------------------------------|-------|-----------------------------------------------------------------------------------------------------|
| ncbi-gi:1560764 mtu:Rv0500   | proC  | Probable pyrroline-5-carboxylate reductase ProC (P5CR) (P5C reductase)                              |
| ncbi-gi:1560879' mtu:Rv1654  | argB  | Probable acetylglutamate kinase ArgB                                                                |
| ncbi-gi:1560879' mtu:Rv1655  | argD  | Probable acetylornithine aminotransferase ArgD                                                      |
| ncbi-gi:1560879' mtu:Rv1656  | argF  | Probable ornithine carbamoyltransferase, anabolic ArgF                                              |
| ncbi-gi:1560935' mtu:Rv2220  | glnA1 | Glutamine synthetase GlnA1 (glutamine synthase) (GS-I)                                              |
| ncbi-gi:1560935' mtu:Rv2222c | glnA2 | Probable glutamine synthetase GlnA2 (glutamine synthase) (GS-II)                                    |
| ncbi-gi:1560961' mtu:Rv2476c | gdh   | Probable NAD-dependent glutamate dehydrogenase Gdh (NAD-Gdh) (NAD-dependent glutamic dehydrogenase) |

#### mtu00061 Fatty acid biosynthesis - Mycobacterium tuberculosis H37Rv (7)

|                              |       |                                                                                                                                                         |
|------------------------------|-------|---------------------------------------------------------------------------------------------------------------------------------------------------------|
| ncbi-gi:1560738' mtu:Rv0242c | fabG4 | Probable 3-oxoacyl-[acyl-carrier protein] reductase FabG4 (3-ketoacyl-acyl carrier protein reductase)                                                   |
| ncbi-gi:5711678' mtu:Rv0824c | desA1 | Probable acyl-[acyl-carrier protein] desaturase DesA1 (acyl-[ACP] desaturase) (stearoyl-ACP desaturase) (protein Des)                                   |
| ncbi-gi:1560823' mtu:Rv1094  | desA2 | Possible acyl-[acyl-carrier protein] desaturase DesA2 (acyl-[ACP] desaturase) (stearoyl-ACP desaturase)                                                 |
| ncbi-gi:1560849' mtu:Rv1350  | fabG2 | Probable 3-oxoacyl-[acyl-carrier protein] reductase FabG2 (3-ketoacyl-acyl carrier protein reductase)                                                   |
| ncbi-gi:1560963' mtu:Rv2501c | accA1 | Probable acetyl-/propionyl-coenzyme A carboxylase alpha chain (alpha subunit) AccA1: biotin carboxylase + biotin carboxyl carrier protein (BCCP)        |
| ncbi-gi:1560966' mtu:Rv2524c | fas   | Probable fatty acid synthase Fas (fatty acid synthetase)                                                                                                |
| ncbi-gi:1561042' mtu:Rv3285  | accA3 | Probable bifunctional protein acetyl-/propionyl-coenzyme A carboxylase (alpha chain) AccA3: biotin carboxylase + biotin carboxyl carrier protein (BCCP) |

#### mtu00072 Synthesis and degradation of ketone bodies - Mycobacterium tuberculosis H37Rv (7)

|                              |       |                                                                                                                                                                    |
|------------------------------|-------|--------------------------------------------------------------------------------------------------------------------------------------------------------------------|
| ncbi-gi:1560738' mtu:Rv0243  | fadA2 | Probable acetyl-CoA acyltransferase FadA2 (3-ketoacyl-CoA thiolase) (beta-ketothiolase)                                                                            |
| ncbi-gi:1560799' mtu:Rv0859  | fadA  | Possible acyl-CoA thiolase FadA                                                                                                                                    |
| ncbi-gi:1560821' mtu:Rv1074c | fadA3 | Probable beta-ketoacyl CoA thiolase FadA3                                                                                                                          |
| ncbi-gi:1560846' mtu:Rv1323  | fadA4 | Probable acetyl-CoA acetyltransferase FadA4 (acetoacetyl-CoA thiolase)                                                                                             |
| ncbi-gi:1560964' mtu:Rv2503c | scoB  | Probable succinyl-CoA:3-ketoacid-coenzyme A transferase (beta subunit) ScoB (3-oxo-acid:CoA transferase) (OXCT B) (succinyl CoA:3-oxoacid CoA-transferase)         |
| ncbi-gi:1560964' mtu:Rv2504c | scoA  | Probable succinyl-CoA:3-ketoacid-coenzyme A transferase (alpha subunit) ScoA (3-oxo acid:CoA transferase) (OXCT A) (succinyl-CoA:3-oxoacid-coenzyme A transferase) |
| ncbi-gi:1561069' mtu:Rv3556c | fadA6 | Probable acetyl-CoA acetyltransferase FadA6 (acetoacetyl-CoA thiolase)                                                                                             |

#### mtu00920 Sulfur metabolism - Mycobacterium tuberculosis H37Rv (6)

|                              |       |                                                                                                                                          |
|------------------------------|-------|------------------------------------------------------------------------------------------------------------------------------------------|
| ncbi-gi:1560753' mtu:Rv0391  | metZ  | Probable O-succinylhomoserine sulfhydrylase MetZ (OSH sulfhydrylase)                                                                     |
| ncbi-gi:1560795' mtu:Rv0815c | cysA2 | Probable thiosulfate sulfurtransferase CysA2 (rhodanese-like protein) (thiosulfate cyanide transsulfurase) (thiosulfate thiotransferase) |
| ncbi-gi:1560821' mtu:Rv1079  | metB  | Cystathionine gamma-synthase MetB (CGS) (O-succinylhomoserine [thiol]-lyase)                                                             |
| ncbi-gi:5711697' mtu:Rv2334  | cysK1 | Cysteine synthase a CysK1 (O-acetylserine sulfhydrylase A) (O-acetylserine (thiol)-lyase A) (CSASE A)                                    |
| ncbi-gi:1560952' mtu:Rv2391  | sirA  | Ferredoxin-dependent sulfite reductase SirA                                                                                              |
| ncbi-gi:1561041' mtu:Rv3283  | sseA  | Probable thiosulfate sulfurtransferase SseA (rhodanese) (thiosulfate cyanide transsulfurase) (thiosulfate thiotransferase)               |

#### mtu00760 Nicotinate and nicotinamide metabolism - Mycobacterium tuberculosis H37Rv (5)

|                              |       |                                                                                                                                                       |
|------------------------------|-------|-------------------------------------------------------------------------------------------------------------------------------------------------------|
| ncbi-gi:1560729' mtu:Rv0155  | pntAa | Probable N catalytic part] (pyridine nucleotide transhydrogenase subunit alpha) (nicotinamide nucleotide transhydrogenase subunit alpha)              |
| ncbi-gi:1560873' mtu:Rv1596  | nadC  | Probable nicotinate-nucleotide pyrophosphatase NadC                                                                                                   |
| ncbi-gi:1560883' mtu:Rv1695  | ppnK  | Inorganic polyphosphate/ATP-NAD kinase PpnK (poly(P)/ATP NAD kinase)                                                                                  |
| ncbi-gi:5711699' mtu:Rv2438c | nadE  | Glutamine-dependent NAD(+) synthetase NadE (NAD(+) synthase [glutamine-hydrolysing])                                                                  |
| ncbi-gi:1560985' mtu:Rv2713  | sthA  | Probable soluble pyridine nucleotide transhydrogenase SthA (STH) (NAD(P)(+) transhydrogenase [B-specific]) (nicotinamide nucleotide transhydrogenase) |

#### mtu00300 Lysine biosynthesis - Mycobacterium tuberculosis H37Rv (5)

|                              |      |                                                                                     |
|------------------------------|------|-------------------------------------------------------------------------------------|
| ncbi-gi:1560799' mtu:Rv0858c | dapC | Probable N-succinyldiaminopimelate aminotransferase DapC (DAP-at)                   |
| ncbi-gi:1560834' mtu:Rv1201c | dapD | Tetrahydrodipicolinate N-succinyltransferase DapD                                   |
| ncbi-gi:1560986' mtu:Rv2726c | dapF | Probable diaminopimelate epimerase DapF (DAP epimerase)                             |
| ncbi-gi:1560989' mtu:Rv2753c | dapA | Probable dihydrodipicolinate synthase DapA (DHDPS) (dihydrodipicolinate synthetase) |
| ncbi-gi:1560991' mtu:Rv2773c | dapB | Dihydrodipicolinate reductase DapB (DHPR)                                           |

#### mtu00430 Taurine and hypotaurine metabolism - Mycobacterium tuberculosis H37Rv (5)

|                              |      |                                                                                                                  |
|------------------------------|------|------------------------------------------------------------------------------------------------------------------|
| ncbi-gi:1560754' mtu:Rv0408  | pta  | Probable phosphate acetyltransferase Pta (phosphotransacetylase)                                                 |
| ncbi-gi:1560791' mtu:Rv0773c | ggTA | Probable bifunctional acylase GgtA: cephalosporin acylase (GL-7ACA acylase) + gamma-glutamyltranspeptidase (GGT) |
| ncbi-gi:1560961' mtu:Rv2476c | gdh  | Probable NAD-dependent glutamate dehydrogenase Gdh (NAD-Gdh) (NAD-dependent glutamic dehydrogenase)              |
| ncbi-gi:1560991' mtu:Rv2780  | ald  | Secreted L-alanine dehydrogenase Ald (40 kDa antigen) (TB43)                                                     |
| ncbi-gi:1561056' mtu:Rv3432c | gadB | Probable glutamate decarboxylase GadB                                                                            |

mtu00350 Tyrosine metabolism - Mycobacterium tuberculosis H37Rv (5)

|                             |       |                                                                              |
|-----------------------------|-------|------------------------------------------------------------------------------|
| ncbi-gi:5711670:mtu:Rv0234c | gabD1 | Succinate-semialdehyde dehydrogenase [NADP+] dependent (SSDH) GabD1          |
| ncbi-gi:5711677:mtu:Rv0761c | adhB  | Possible zinc-containing alcohol dehydrogenase NAD dependent AdhB            |
| ncbi-gi:4488247:mtu:Rv1703c |       | Probable catechol-O-methyltransferase                                        |
| ncbi-gi:5711690:mtu:Rv1731  | gabD2 | Possible succinate-semialdehyde dehydrogenase [NADP+] dependent (SSDH) GabD2 |
| ncbi-gi:1561022:mtu:Rv3086  | adhD  | Probable zinc-type alcohol dehydrogenase AdhD (aldehyde reductase)           |

mtu00670 One carbon pool by folate - Mycobacterium tuberculosis H37Rv (5)

|                             |       |                                                                                                                                                                                                                                                                                                                |
|-----------------------------|-------|----------------------------------------------------------------------------------------------------------------------------------------------------------------------------------------------------------------------------------------------------------------------------------------------------------------|
| ncbi-gi:1560753:mtu:Rv0389  | purT  | Probable phosphoribosylglycinamide formyltransferase 2 PurT (GART 2) (gar transformylase 2) (5'-phosphoribosylglycinamide transformylase 2) (formate-dependent gar transformylase)                                                                                                                             |
| ncbi-gi:1560809:mtu:Rv0957  | purH  | Probable bifunctional purine biosynthesis protein PurH: phosphoribosylaminoimidazolecarboxamide formyltransferase (AICAR transformylase) (5'-phosphoribosyl-5-aminoimidazole-4-carboxamide formyltransferase) + inosinemonophosphate cyclohydrolase (imp cyclohydrolase) (inosinicase) (imp synthetase) (ATIC) |
| ncbi-gi:4488247:mtu:Rv1093  | glyA1 | Serine hydroxymethyltransferase 1 GlyA1                                                                                                                                                                                                                                                                        |
| ncbi-gi:1560934:mtu:Rv2211c | gcvT  | Probable aminomethyltransferase GcvT (glycine cleavage system T protein)                                                                                                                                                                                                                                       |
| ncbi-gi:1561049:mtu:Rv3356c | folD  | Probable bifunctional protein FolD: methylenetetrahydrofolate dehydrogenase + methenyltetrahydrofolate cyclohydrolase                                                                                                                                                                                          |

mtu01040 Biosynthesis of unsaturated fatty acids - Mycobacterium tuberculosis H37Rv (5)

|                             |       |                                                                                                                       |
|-----------------------------|-------|-----------------------------------------------------------------------------------------------------------------------|
| ncbi-gi:1560738:mtu:Rv0242c | fabG4 | Probable 3-oxoacyl-[acyl-carrier protein] reductase FabG4 (3-ketoacyl-acyl carrier protein reductase)                 |
| ncbi-gi:5711678:mtu:Rv0824c | desA1 | Probable acyl-[acyl-carrier protein] desaturase DesA1 (acyl-[ACP] desaturase) (stearoyl-ACP desaturase) (protein Des) |
| ncbi-gi:1560800:mtu:Rv0860  | fadB  | Probable fatty oxidation protein FadB                                                                                 |
| ncbi-gi:1560823:mtu:Rv1094  | desA2 | Possible acyl-[acyl-carrier protein] desaturase DesA2 (acyl-[ACP] desaturase) (stearoyl-ACP desaturase)               |
| ncbi-gi:1560849:mtu:Rv1350  | fabG2 | Probable 3-oxoacyl-[acyl-carrier protein] reductase FabG2 (3-ketoacyl-acyl carrier protein reductase)                 |

mtu00623 Toluene degradation - Mycobacterium tuberculosis H37Rv (5)

|                             |      |                                                                                                                                                           |
|-----------------------------|------|-----------------------------------------------------------------------------------------------------------------------------------------------------------|
| ncbi-gi:1560738:mtu:Rv0247c |      | Probable succinate dehydrogenase [iron-sulfur subunit] (succinic dehydrogenase)                                                                           |
| ncbi-gi:1560738:mtu:Rv0248c |      | Probable succinate dehydrogenase [iron-sulfur subunit] (succinic dehydrogenase)                                                                           |
| ncbi-gi:1560919:mtu:Rv2054  |      | hypothetical protein                                                                                                                                      |
| ncbi-gi:1560990:mtu:Rv2765  |      | Probable alanine rich hydrolase                                                                                                                           |
| ncbi-gi:1561045:mtu:Rv3318  | sdhA | Probable succinate dehydrogenase (flavoprotein subunit) SdhA (succinic dehydrogenase) (fumarate reductase) (fumarate dehydrogenase) (fumaric hydrogenase) |

mtu05152 Tuberculosis - Mycobacterium tuberculosis H37Rv (5)

|                             |        |                                                                                                                                           |
|-----------------------------|--------|-------------------------------------------------------------------------------------------------------------------------------------------|
| ncbi-gi:1560749:mtu:Rv0350  | dnaK   | Probable chaperone protein DnaK (heat shock protein 70) (heat shock 70 kDa protein) (HSP70)                                               |
| ncbi-gi:1560755:mtu:Rv0410c | pknG   | Serine/threonine-protein kinase PknG (protein kinase G) (STPK G)                                                                          |
| ncbi-gi:1560758:mtu:Rv0440  | groEL2 | 60 kDa chaperonin 2 GroEL2 (protein CPN60-2) (GroEL protein 2) (65 kDa antigen) (heat shock protein 65) (cell wall protein A) (antigen A) |
| ncbi-gi:5711680:mtu:Rv0932c | pstS2  | Periplasmic phosphate-binding lipoprotein PstS2 (PBP-2) (PstS2)                                                                           |
| ncbi-gi:1561055:mtu:Rv3417c | groEL1 | 60 kDa chaperonin 1 GroEL1 (protein CPN60-1) (GroEL protein 1)                                                                            |

mtu00750 Vitamin B6 metabolism - Mycobacterium tuberculosis H37Rv (4)

|                             |      |                                                                                                                                           |
|-----------------------------|------|-------------------------------------------------------------------------------------------------------------------------------------------|
| ncbi-gi:1560802:mtu:Rv0884c | serC | Possible phosphoserine aminotransferase SerC (PSAT)                                                                                       |
| ncbi-gi:1560843:mtu:Rv1295  | thrC | Threonine synthase ThrC (ts)                                                                                                              |
| ncbi-gi:1560974:mtu:Rv2606c | snzP | Possible pyridoxine biosynthesis protein SnzP                                                                                             |
| ncbi-gi:1560974:mtu:Rv2607  | pdxH | Probable pyridoxamine 5'-phosphate oxidase PdxH (PNP/PMP oxidase) (pyridoxinephosphate oxidase) (PNPOX) (pyridoxine 5'-phosphate oxidase) |

mtu00660 C5-Branched dibasic acid metabolism - Mycobacterium tuberculosis H37Rv (4)

|                             |       |                                                                                               |
|-----------------------------|-------|-----------------------------------------------------------------------------------------------|
| ncbi-gi:1560809:mtu:Rv0951  | sucC  | Probable succinyl-CoA synthetase (beta chain) SucC (SCS-beta)                                 |
| ncbi-gi:1560809:mtu:Rv0952  | sucD  | Probable succinyl-CoA synthetase (alpha chain) SucD (SCS-alpha)                               |
| ncbi-gi:1561013:mtu:Rv3002c | ilvN  | Probable acetolactate synthase (small subunit) IlvN (acetohydroxy-acid synthase) (AHAS) (ALS) |
| ncbi-gi:5711704:mtu:Rv3003c | ilvB1 | Acetolactate synthase (large subunit) IlvB1 (acetohydroxy-acid synthase)                      |

mtu03440 Homologous recombination - Mycobacterium tuberculosis H37Rv (4)

|                             |      |                                                                                                                    |
|-----------------------------|------|--------------------------------------------------------------------------------------------------------------------|
| ncbi-gi:1560714:mtu:Rv0002  | dnaN | DNA polymerase III (beta chain) DnaN (DNA nucleotidyltransferase)                                                  |
| ncbi-gi:1560719:mtu:Rv0054  | ssb  | Single-strand binding protein Ssb (helix-destabilizing protein)                                                    |
| ncbi-gi:1560777:mtu:Rv0631c | recC | Probable exonuclease V (gamma chain) RecC (exodeoxyribonuclease V gamma chain)(exodeoxyribonuclease V polypeptide) |
| ncbi-gi:1560876:mtu:Rv1629  | poIA | Probable DNA polymerase I PoIA                                                                                     |

mtu01220 Degradation of aromatic compounds - Mycobacterium tuberculosis H37Rv (4)

|                             |      |                                                                    |
|-----------------------------|------|--------------------------------------------------------------------|
| ncbi-gi:5711677:mtu:Rv0761c | adhB | Possible zinc-containing alcohol dehydrogenase NAD dependent AdhB  |
| ncbi-gi:1561022:mtu:Rv3086  | adhD | Probable zinc-type alcohol dehydrogenase AdhD (aldehyde reductase) |
| ncbi-gi:1561070:mtu:Rv3568c | hsaC | 3,4-DHSA dioxygenase                                               |
| ncbi-gi:1561070:mtu:Rv3569c | hsaD | 4,9-DHSA hydrolase                                                 |

mtu00984 Steroid degradation - Mycobacterium tuberculosis H37Rv (4)

|                             |      |                                                                                                      |
|-----------------------------|------|------------------------------------------------------------------------------------------------------|
| ncbi-gi:1560790:mtu:Rv0760c |      | hypothetical protein                                                                                 |
| ncbi-gi:1561070:mtu:Rv3568c | hsaC | 3,4-DHSA dioxygenase                                                                                 |
| ncbi-gi:1561070:mtu:Rv3569c | hsaD | 4,9-DHSA hydrolase                                                                                   |
| ncbi-gi:1561070:mtu:Rv3570c | hsaA | Possible oxidoreductase Possible 3-hydroxy-9,10-seconandrost-1,3,5(10)-triene-9,17-dione hydroxylase |

mtu03030 DNA replication - Mycobacterium tuberculosis H37Rv (3)

|                            |      |                                                                   |
|----------------------------|------|-------------------------------------------------------------------|
| ncbi-gi:1560714:mtu:Rv0002 | dnaN | DNA polymerase III (beta chain) DnaN (DNA nucleotidyltransferase) |
| ncbi-gi:1560719:mtu:Rv0054 | ssb  | Single-strand binding protein Ssb (helix-destabilizing protein)   |
| ncbi-gi:1560876:mtu:Rv1629 | poIA | Probable DNA polymerase I PolA                                    |

#### mtu00860 Porphyrin and chlorophyll metabolism - Mycobacterium tuberculosis H37Rv (3)

|                             |      |                                                                                                                                                 |
|-----------------------------|------|-------------------------------------------------------------------------------------------------------------------------------------------------|
| ncbi-gi:1560765:mtu:Rv0510  | hemC | Probable porphobilinogen deaminase HemC (PBG) (hydroxymethylbilane synthase) (HMBS) (pre-uroporphyrinogen synthase)                             |
| ncbi-gi:5711674:mtu:Rv0511  | hemD | Probable uroporphyrin-III C-methyltransferase HemD (uroporphyrinogen III methylase) (urogen III methylase) (SUMT) (urogen III methylase) (UROM) |
| ncbi-gi:5711704:mtu:Rv2992c | gltS | Glutamyl-tRNA synthetase GltS (glutamate--tRNA ligase) (glutamyl-tRNA synthase) (GLURS)                                                         |

#### mtu00500 Starch and sucrose metabolism - Mycobacterium tuberculosis H37Rv (3)

|                             |      |                                                                                                             |
|-----------------------------|------|-------------------------------------------------------------------------------------------------------------|
| ncbi-gi:1560726:mtu:Rv0127  | mak  | Maltokinase Mak                                                                                             |
| ncbi-gi:1560808:mtu:Rv0946c | pgi  | Probable glucose-6-phosphate isomerase Pgi (GPI) (phosphoglucose isomerase) (phosphohexose isomerase) (phi) |
| ncbi-gi:1560846:mtu:Rv1328  | glgP | Probable glycogen phosphorylase GlgP                                                                        |

#### mtu00625 Chloroalkane and chloroalkene degradation - Mycobacterium tuberculosis H37Rv (3)

|                             |      |                                                                    |
|-----------------------------|------|--------------------------------------------------------------------|
| ncbi-gi:5711677:mtu:Rv0761c | adhB | Possible zinc-containing alcohol dehydrogenase NAD dependent AdhB  |
| ncbi-gi:1560943:mtu:Rv2296  |      | Probable haloalkane dehalogenase                                   |
| ncbi-gi:1561022:mtu:Rv3086  | adhD | Probable zinc-type alcohol dehydrogenase AdhD (aldehyde reductase) |

#### mtu00626 Naphthalene degradation - Mycobacterium tuberculosis H37Rv (3)

|                             |      |                                                                    |
|-----------------------------|------|--------------------------------------------------------------------|
| ncbi-gi:1560736:mtu:Rv0223c |      | Probable aldehyde dehydrogenase                                    |
| ncbi-gi:5711677:mtu:Rv0761c | adhB | Possible zinc-containing alcohol dehydrogenase NAD dependent AdhB  |
| ncbi-gi:1561022:mtu:Rv3086  | adhD | Probable zinc-type alcohol dehydrogenase AdhD (aldehyde reductase) |

#### mtu00052 Galactose metabolism - Mycobacterium tuberculosis H37Rv (3)

|                             |       |                                                                                                                                                                    |
|-----------------------------|-------|--------------------------------------------------------------------------------------------------------------------------------------------------------------------|
| ncbi-gi:1560916:mtu:Rv2029c | pfkB  | 6-phosphofructokinase PfkB (phosphohexokinase) (phosphofructokinase)                                                                                               |
| ncbi-gi:1561014:mtu:Rv3010c | pfkA  | Probable 6-phosphofructokinase PfkA (phosphohexokinase) (phosphofructokinase)                                                                                      |
| ncbi-gi:5711713:mtu:Rv3634c | galE1 | UDP-glucose 4-epimerase GalE1 (galactowaldenase) (UDP-galactose 4-epimerase) (uridine diphosphate galactose 4-epimerase) (uridine diphospho-galactose 4-epimerase) |

#### mtu03020 RNA polymerase - Mycobacterium tuberculosis H37Rv (3)

|                             |      |                                                                                                                                                              |
|-----------------------------|------|--------------------------------------------------------------------------------------------------------------------------------------------------------------|
| ncbi-gi:1560780:mtu:Rv0667  | rpoB | DNA-directed RNA polymerase (beta chain) RpoB (transcriptase beta chain) (RNA polymerase beta subunit)                                                       |
| ncbi-gi:1560780:mtu:Rv0668  | rpoC | DNA-directed RNA polymerase (beta' chain) RpoC (transcriptase beta' chain) (RNA polymerase beta' subunit)                                                    |
| ncbi-gi:1561059:mtu:Rv3457c | rpoA | Probable DNA-directed RNA polymerase (alpha chain) RpoA (transcriptase alpha chain) (RNA polymerase alpha subunit) (DNA-directed RNA nucleotidyltransferase) |

#### mtu00361 Chlorocyclohexane and chlorobenzene degradation - Mycobacterium tuberculosis H37Rv (3)

|                            |  |                                  |
|----------------------------|--|----------------------------------|
| ncbi-gi:1560919:mtu:Rv2054 |  | hypothetical protein             |
| ncbi-gi:1560943:mtu:Rv2296 |  | Probable haloalkane dehalogenase |
| ncbi-gi:1560990:mtu:Rv2765 |  | Probable alanine rich hydrolase  |

#### mtu00340 Histidine metabolism - Mycobacterium tuberculosis H37Rv (3)

|                             |      |                                                                                       |
|-----------------------------|------|---------------------------------------------------------------------------------------|
| ncbi-gi:1560873:mtu:Rv1601  | hisB | Probable imidazole glycerol-phosphate dehydratase HisB                                |
| ncbi-gi:1560874:mtu:Rv1603  | hisA | Probable phosphoribosylformimino-5-aminoimidazole carboxamide ribotide isomerase HisA |
| ncbi-gi:1560925:mtu:Rv2121c | hisG | ATP phosphoribosyltransferase HisG                                                    |

#### mtu00564 Glycerophospholipid metabolism - Mycobacterium tuberculosis H37Rv (2)

|                             |       |                                                   |
|-----------------------------|-------|---------------------------------------------------|
| ncbi-gi:1560931:mtu:Rv2182c |       | 1-acylglycerol-3-phosphate O-acyltransferase      |
| ncbi-gi:1561043:mtu:Rv3302c | glpD2 | Probable glycerol-3-phosphate dehydrogenase GlpD2 |

#### mtu01053 Biosynthesis of siderophore group nonribosomal peptides - Mycobacterium tuberculosis H37Rv (2)

|                            |      |                                                                                                |
|----------------------------|------|------------------------------------------------------------------------------------------------|
| ncbi-gi:1560952:mtu:Rv2384 | mbtA | Bifunctional enzyme MbtA: salicyl-AMP ligase (SAL-AMP ligase) + salicyl-S-ArCP synthetase      |
| ncbi-gi:1561035:mtu:Rv3215 | entC | Probable isochorismate synthase EntC (isochorismate hydroxymutase) (enterochelin biosynthesis) |

#### mtu03410 Base excision repair - Mycobacterium tuberculosis H37Rv (2)

|                            |      |                                                                     |
|----------------------------|------|---------------------------------------------------------------------|
| ncbi-gi:1560781:mtu:Rv0670 | end  | Probable endonuclease IV End (endodeoxyribonuclease IV) (apurinase) |
| ncbi-gi:1560876:mtu:Rv1629 | poIA | Probable DNA polymerase I PolA                                      |

#### mtu04122 Sulfur relay system - Mycobacterium tuberculosis H37Rv (2)

|                             |       |                                                                                                                                          |
|-----------------------------|-------|------------------------------------------------------------------------------------------------------------------------------------------|
| ncbi-gi:1560795:mtu:Rv0815c | cysA2 | Probable thiosulfate sulfurtransferase CysA2 (rhodanese-like protein) (thiosulfate cyanide transsulfurase) (thiosulfate thiotransferase) |
| ncbi-gi:1561041:mtu:Rv3283  | sseA  | Probable thiosulfate sulfurtransferase SseA (rhodanese) (thiosulfate cyanide transsulfurase) (thiosulfate thiotransferase)               |

mtu00740 Riboflavin metabolism - Mycobacterium tuberculosis H37Rv (2)

ncbi-gi:4488247:mtu:Rv1416 ribH Probable riboflavin synthase beta chain RibH (6,7-dimethyl-8-ribityllumazine synthase) (DMRL synthase) (lumazine synthase)  
ncbi-gi:1560992:mtu:Rv2786c ribF Probable bifunctional FAD synthetase/riboflavin biosynthesis protein RibF: riboflavin kinase (flavokinase) + FMN adenylyltransferase (FAD pyrophosphorylase) (FAD synthetase)(FAD diphosphorylase) (flavin adenine dinucleotide synthetase)

mtu03420 Nucleotide excision repair - Mycobacterium tuberculosis H37Rv (2)

ncbi-gi:1560876:mtu:Rv1629 polA Probable DNA polymerase I PolA  
ncbi-gi:1560877:mtu:Rv1638 uvrA Probable excinuclease ABC (subunit A-DNA-binding ATPase) UvrA

mtu00562 Inositol phosphate metabolism - Mycobacterium tuberculosis H37Rv (2)

ncbi-gi:1560789:mtu:Rv0753c mmsA Probable methylmalonate-semialdehyde dehydrogenase MmsA (methylmalonic acid semialdehyde dehydrogenase) (MMSDH)  
ncbi-gi:1560857:mtu:Rv1438 tpi Probable triosephosphate isomerase Tpi (TIM)

mtu00130 Ubiquinone and other terpenoid-quinone biosynthesis - Mycobacterium tuberculosis H37Rv (2)

ncbi-gi:1560768:mtu:Rv0548c menB Naphthoate synthase MenB (dihydroxynaphthoic acid synthetase) (DHNA synthetase)  
ncbi-gi:1561035:mtu:Rv3215 entC Probable isochorismate synthase EntC (isochorismate hydroxymutase) (enterochelin biosynthesis)

mtu00460 Cyanoamino acid metabolism - Mycobacterium tuberculosis H37Rv (2)

ncbi-gi:1560791:mtu:Rv0773c ggtA Probable bifunctional acylase GgtA: cephalosporin acylase (GL-7ACA acylase) + gamma-glutamyltranspeptidase (GGT)  
ncbi-gi:4488247:mtu:Rv1093 glyA1 Serine hydroxymethyltransferase 1 GlyA1

mtu00730 Thiamine metabolism - Mycobacterium tuberculosis H37Rv (2)

ncbi-gi:1560756:mtu:Rv0422c thiD Probable phosphomethylpyrimidine kinase ThiD (HMP-phosphate kinase) (HMP-P kinase)  
ncbi-gi:1560756:mtu:Rv0423c thiC Probable thiamine biosynthesis protein ThiC

mtu00364 Fluorobenzoate degradation - Mycobacterium tuberculosis H37Rv (2)

ncbi-gi:1560919:mtu:Rv2054 hypothetical protein  
ncbi-gi:1560990:mtu:Rv2765 Probable alanine rich hydrolase

mtu00550 Peptidoglycan biosynthesis - Mycobacterium tuberculosis H37Rv (2)

ncbi-gi:1560762:mtu:Rv0482 murB Probable UDP-N-acetylenolpyruvoylglucosamine reductase MurB (UDP-N-acetylmuramate dehydrogenase)  
ncbi-gi:1560845:mtu:Rv1315 murA Probable UDP-N-acetylglucosamine 1-carboxyvinyltransferase MurA

mtu00450 Selenocompound metabolism - Mycobacterium tuberculosis H37Rv (2)

ncbi-gi:1560821:mtu:Rv1079 metB Cystathionine gamma-synthase MetB (CGS) (O-succinylhomoserine [thiol]-lyase)  
ncbi-gi:1560827:mtu:Rv1133c metE Probable 5-methyltetrahydropteroyltrimethylglutamate--homocysteine methyltransferase MetE (methionine synthase, vitamin-B12 independent isozyme)

mtu03430 Mismatch repair - Mycobacterium tuberculosis H37Rv (2)

ncbi-gi:1560714:mtu:Rv0002 dnaN DNA polymerase III (beta chain) DnaN (DNA nucleotidyltransferase)  
ncbi-gi:1560719:mtu:Rv0054 ssb Single-strand binding protein Ssb (helix-destabilizing protein)

mtu00780 Biotin metabolism - Mycobacterium tuberculosis H37Rv (2)

ncbi-gi:1560738:mtu:Rv0242c fabG4 Probable 3-oxoacyl-[acyl-carrier protein] reductase FabG4 (3-ketoacyl-acyl carrier protein reductase)  
ncbi-gi:1560849:mtu:Rv1350 fabG2 Probable 3-oxoacyl-[acyl-carrier protein] reductase FabG2 (3-ketoacyl-acyl carrier protein reductase)

mtu00790 Folate biosynthesis - Mycobacterium tuberculosis H37Rv (2)

ncbi-gi:5711668:mtu:Rv0013 trpG Possible anthranilate synthase component II TrpG (glutamine amidotransferase)  
ncbi-gi:1561074:mtu:Rv3609c folE GTP cyclohydrolase I FolE (GTP-ch-I)

mtu00642 Ethylbenzene degradation - Mycobacterium tuberculosis H37Rv (1)

ncbi-gi:4488247:mtu:Rv2790c ltp1 Probable lipid-transfer protein Ltp1

mtu00561 Glycerolipid metabolism - Mycobacterium tuberculosis H37Rv (1)

ncbi-gi:1560931:mtu:Rv2182c 1-acylglycerol-3-phosphate O-acyltransferase

mtu00622 Xylene degradation - Mycobacterium tuberculosis H37Rv (1)

ncbi-gi:1561067:mtu:Rv3535c hsaG Probable acetaldehyde dehydrogenase (acetaldehyde dehydrogenase [acetylating])

mtu00521 Streptomycin biosynthesis - Mycobacterium tuberculosis H37Rv (1)

ncbi-gi:1560747:mtu:Rv0334 rmlA Alpha-D-glucose-1-phosphate thymidyltransferase RmlA (dTDP-glucose synthase) (dTDP-glucose pyrophosphorylase)

mtu00633 Nitrotoluene degradation - Mycobacterium tuberculosis H37Rv (1)

ncbi-gi:5711712:mtu:Rv3566c nat Arylamine N-acetyltransferase Nat (arylamine acetylase)

mtu03060 Protein export - Mycobacterium tuberculosis H37Rv (1)

ncbi-gi:1560895:mtu:Rv1821 secA2 Possible preprotein translocase ATPase SecA2

mtu03070 Bacterial secretion system - Mycobacterium tuberculosis H37Rv (1)

ncbi-gi:1560895:mtu:Rv1821 secA2 Possible preprotein translocase ATPase SecA2

mtu00621 Dioxin degradation - Mycobacterium tuberculosis H37Rv (1)

ncbi-gi:1561067 mtu:Rv3535c hsaG Probable acetaldehyde dehydrogenase (acetaldehyde dehydrogenase [acetyating])

mtu00523 Polyketide sugar unit biosynthesis - Mycobacterium tuberculosis H37Rv (1)

ncbi-gi:1560747:mtu:Rv0334 rmlA Alpha-D-glucose-1-phosphate thymidyltransferase RmlA (dTDP-glucose synthase) (dTDP-glucose pyrophosphorylase)

mtu03050 Proteasome - Mycobacterium tuberculosis H37Rv (1)

ncbi-gi:1560924:mtu:Rv2109c prcA Proteasom assembles with beta subunit PrcB

mtu02010 ABC transporters - Mycobacterium tuberculosis H37Rv (1)

ncbi-gi:5711680:mtu:Rv0932c pstS2 Periplasmic phosphate-binding lipoprotein PstS2 (PBP-2) (PstS2)

mtu00592 alpha-Linolenic acid metabolism - Mycobacterium tuberculosis H37Rv (1)

ncbi-gi:4488247:mtu:Rv2790c ltp1 Probable lipid-transfer protein Ltp1
